# Supplementary material
Source: MDPI journal article supplement (https://www.mdpi.com/2304-6740/7/11/134)

# checkCIF/PLATON report

Structure factors have been supplied for datablock(s) MAW160517

THIS REPORT IS FOR GUIDANCE ONLY. IF USED AS PART OF A REVIEW PROCEDURE FOR PUBLICATION, IT SHOULD NOT REPLACE THE EXPERTISE OF AN EXPERIENCED CRYSTALLOGRAPHIC REFEREE.

No syntax errors found.      CIF dictionary      Interpreting this report

## Datablock: MAW160517

---

Bond precision:    C-C = 0.0028 Å                      Wavelength=1.54184

Cell:                      a=7.0695(1)              b=18.0623(2)              c=12.1056(1)  
                            alpha=90              beta=97.105(1)              gamma=90  
Temperature:              183 K

|                | Calculated                                          | Reported            |
|----------------|-----------------------------------------------------|---------------------|
| Volume         | 1533.91(3)                                          | 1533.91(3)          |
| Space group    | P 21/m                                              | P 21/m              |
| Hall group     | -P 2yb                                              | -P 2yb              |
| Moiety formula | C22 H21 N3 O2, 2(C2 H0.50 F3 O2), C2 H O2, Cl, 3(F) | ?                   |
| Sum formula    | C28 H23 Cl F9 N3 O8                                 | C28 H23 Cl F9 N3 O8 |
| Mr             | 735.94                                              | 735.94              |
| Dx,g cm-3      | 1.593                                               | 1.593               |
| Z              | 2                                                   | 2                   |
| Mu (mm-1)      | 2.113                                               | 2.113               |
| F000           | 748.0                                               | 748.0               |
| F000'          | 751.93                                              |                     |
| h,k,lmax       | 8,22,15                                             | 9,22,15             |
| Nref           | 3412                                                | 3361                |
| Tmin,Tmax      | 0.776,0.900                                         | 0.818,1.000         |
| Tmin'          | 0.590                                               |                     |

Correction method= # Reported T Limits: Tmin=0.818 Tmax=1.000  
AbsCorr = MULTI-SCAN

Data completeness= 0.985                      Theta(max)= 78.949

R(reflections)= 0.0480( 3028)              wR2(reflections)= 0.1428( 3361)

S = 1.066                      Npar= 317

---

The following ALERTS were generated. Each ALERT has the format

**test-name\_ALERT\_alert-type\_alert-level.**

Click on the hyperlinks for more details of the test.

### Alert level B

PLAT430\_ALERT\_2\_B Short Inter D...A Contact O32 .. O32 .. 2.77 Ang.

### Alert level C

PLAT234\_ALERT\_4\_C Large Hirshfeld Difference F25 -- C24 .. 0.17 Ang.  
 PLAT234\_ALERT\_4\_C Large Hirshfeld Difference F30 -- C24 .. 0.16 Ang.  
 PLAT244\_ALERT\_4\_C Low 'Solvent' Ueq as Compared to Neighbors of C21 Check  
 PLAT250\_ALERT\_2\_C Large U3/U1 Ratio for Average U(i,j) Tensor .... 2.4 Note  
 PLAT480\_ALERT\_4\_C Long H...A H-Bond Reported H9 .. F39 .. 2.64 Ang.  
 PLAT911\_ALERT\_3\_C Missing # FCF Refl Between THmin & STh/L= 0.600 2 Report

### Alert level G

PLAT002\_ALERT\_2\_G Number of Distance or Angle Restraints on AtSite 12 Note  
 PLAT003\_ALERT\_2\_G Number of Uiso or Uij Restrained non-H Atoms ... 10 Report  
 PLAT007\_ALERT\_5\_G Number of Unrefined Donor-H Atoms ..... 3 Report  
 PLAT143\_ALERT\_4\_G s.u. on c - Axis Small or Missing ..... 0.00010 Ang.  
 PLAT172\_ALERT\_4\_G The CIF-Embedded .res File Contains DFIX Records 2 Report  
 PLAT176\_ALERT\_4\_G The CIF-Embedded .res File Contains SADI Records 3 Report  
 PLAT187\_ALERT\_4\_G The CIF-Embedded .res File Contains RIGU Records 2 Report  
 PLAT244\_ALERT\_4\_G Low 'Solvent' Ueq as Compared to Neighbors of C24 Check  
 PLAT300\_ALERT\_4\_G Atom Site Occupancy of H14A is Constrained at 0.5 Check  
 PLAT300\_ALERT\_4\_G Atom Site Occupancy of H14B is Constrained at 0.5 Check  
 PLAT300\_ALERT\_4\_G Atom Site Occupancy of F25 is Constrained at 0.5 Check  
 PLAT300\_ALERT\_4\_G Atom Site Occupancy of F26 is Constrained at 0.5 Check  
 PLAT300\_ALERT\_4\_G Atom Site Occupancy of F27 is Constrained at 0.5 Check  
 PLAT300\_ALERT\_4\_G Atom Site Occupancy of F28 is Constrained at 0.5 Check  
 PLAT300\_ALERT\_4\_G Atom Site Occupancy of F29 is Constrained at 0.5 Check  
 PLAT300\_ALERT\_4\_G Atom Site Occupancy of F30 is Constrained at 0.5 Check  
 PLAT300\_ALERT\_4\_G Atom Site Occupancy of H23 is Constrained at 0.5 Check  
 PLAT300\_ALERT\_4\_G Atom Site Occupancy of O32 is Constrained at 0.5 Check  
 PLAT300\_ALERT\_4\_G Atom Site Occupancy of O33 is Constrained at 0.5 Check  
 PLAT300\_ALERT\_4\_G Atom Site Occupancy of C31 is Constrained at 0.5 Check  
 PLAT300\_ALERT\_4\_G Atom Site Occupancy of C34 is Constrained at 0.5 Check  
 PLAT300\_ALERT\_4\_G Atom Site Occupancy of H33 is Constrained at 0.5 Check  
 PLAT300\_ALERT\_4\_G Atom Site Occupancy of F37 is Constrained at 0.7 Check  
 PLAT300\_ALERT\_4\_G Atom Site Occupancy of F35 is Constrained at 0.35 Check  
 PLAT300\_ALERT\_4\_G Atom Site Occupancy of F36 is Constrained at 0.35 Check  
 PLAT300\_ALERT\_4\_G Atom Site Occupancy of F38 is Constrained at 0.15 Check  
 PLAT300\_ALERT\_4\_G Atom Site Occupancy of F39 is Constrained at 0.15 Check  
 PLAT300\_ALERT\_4\_G Atom Site Occupancy of F40 is Constrained at 0.15 Check  
 PLAT302\_ALERT\_4\_G Anion/Solvent/Minor-Residue Disorder (Resd 2).. 43 % Note  
 PLAT302\_ALERT\_4\_G Anion/Solvent/Minor-Residue Disorder (Resd 3).. 100 % Note  
 PLAT302\_ALERT\_4\_G Anion/Solvent/Minor-Residue Disorder (Resd 5).. 100 % Note  
 PLAT302\_ALERT\_4\_G Anion/Solvent/Minor-Residue Disorder (Resd 6).. 100 % Note  
 PLAT302\_ALERT\_4\_G Anion/Solvent/Minor-Residue Disorder (Resd 7).. 100 % Note  
 PLAT302\_ALERT\_4\_G Anion/Solvent/Minor-Residue Disorder (Resd 8).. 100 % Note  
 PLAT302\_ALERT\_4\_G Anion/Solvent/Minor-Residue Disorder (Resd 9).. 100 % Note  
 PLAT302\_ALERT\_4\_G Anion/Solvent/Minor-Residue Disorder (Resd 10).. 100 % Note  
 PLAT304\_ALERT\_4\_G Non-Integer Number of Atoms ( 7.50) in Resd. # 2 Check  
 PLAT304\_ALERT\_4\_G Non-Integer Number of Atoms ( 2.50) in Resd. # 3 Check  
 PLAT304\_ALERT\_4\_G Non-Integer Number of Atoms ( 0.50) in Resd. # 4 Check  
 PLAT304\_ALERT\_4\_G Non-Integer Number of Atoms ( 0.35) in Resd. # 5 Check  
 PLAT304\_ALERT\_4\_G Non-Integer Number of Atoms ( 0.35) in Resd. # 6 Check  
 PLAT304\_ALERT\_4\_G Non-Integer Number of Atoms ( 0.35) in Resd. # 7 Check

|                   |                                                  |            |            |      |       |
|-------------------|--------------------------------------------------|------------|------------|------|-------|
| PLAT304_ALERT_4_G | Non-Integer Number of Atoms (                    | 0.15)      | in Resd. # | 8    | Check |
| PLAT304_ALERT_4_G | Non-Integer Number of Atoms (                    | 0.15)      | in Resd. # | 9    | Check |
| PLAT304_ALERT_4_G | Non-Integer Number of Atoms (                    | 0.15)      | in Resd. # | 10   | Check |
| PLAT367_ALERT_2_G | Long? C(sp?)-C(sp?) Bond                         | C14 - C15  | ..         | 1.51 | Ang.  |
| PLAT432_ALERT_2_G | Short Inter X...Y Contact                        | F37 .. C34 | ..         | 1.40 | Ang.  |
| PLAT432_ALERT_2_G | Short Inter X...Y Contact                        | F37 .. C34 | ..         | 1.40 | Ang.  |
| PLAT432_ALERT_2_G | Short Inter X...Y Contact                        | F37 .. C31 | ..         | 2.32 | Ang.  |
| PLAT432_ALERT_2_G | Short Inter X...Y Contact                        | F37 .. C31 | ..         | 2.32 | Ang.  |
| PLAT432_ALERT_2_G | Short Inter X...Y Contact                        | O32 .. C31 | ..         | 1.63 | Ang.  |
| PLAT432_ALERT_2_G | Short Inter X...Y Contact                        | O32 .. C34 | ..         | 2.05 | Ang.  |
| PLAT432_ALERT_2_G | Short Inter X...Y Contact                        | O33 .. C31 | ..         | 0.94 | Ang.  |
| PLAT432_ALERT_2_G | Short Inter X...Y Contact                        | O33 .. C34 | ..         | 2.43 | Ang.  |
| PLAT432_ALERT_2_G | Short Inter X...Y Contact                        | F35 .. C34 | ..         | 1.35 | Ang.  |
| PLAT432_ALERT_2_G | Short Inter X...Y Contact                        | F35 .. C34 | ..         | 1.80 | Ang.  |
| PLAT432_ALERT_2_G | Short Inter X...Y Contact                        | F35 .. C31 | ..         | 2.14 | Ang.  |
| PLAT432_ALERT_2_G | Short Inter X...Y Contact                        | F35 .. C31 | ..         | 2.44 | Ang.  |
| PLAT432_ALERT_2_G | Short Inter X...Y Contact                        | F36 .. C34 | ..         | 1.10 | Ang.  |
| PLAT432_ALERT_2_G | Short Inter X...Y Contact                        | F36 .. C34 | ..         | 1.27 | Ang.  |
| PLAT432_ALERT_2_G | Short Inter X...Y Contact                        | F36 .. C31 | ..         | 2.34 | Ang.  |
| PLAT432_ALERT_2_G | Short Inter X...Y Contact                        | F36 .. C31 | ..         | 2.42 | Ang.  |
| PLAT432_ALERT_2_G | Short Inter X...Y Contact                        | F38 .. C34 | ..         | 1.04 | Ang.  |
| PLAT432_ALERT_2_G | Short Inter X...Y Contact                        | F38 .. C34 | ..         | 1.32 | Ang.  |
| PLAT432_ALERT_2_G | Short Inter X...Y Contact                        | F38 .. C31 | ..         | 2.35 | Ang.  |
| PLAT432_ALERT_2_G | Short Inter X...Y Contact                        | F38 .. C31 | ..         | 2.48 | Ang.  |
| PLAT432_ALERT_2_G | Short Inter X...Y Contact                        | F39 .. C34 | ..         | 1.28 | Ang.  |
| PLAT432_ALERT_2_G | Short Inter X...Y Contact                        | F39 .. C34 | ..         | 1.70 | Ang.  |
| PLAT432_ALERT_2_G | Short Inter X...Y Contact                        | F39 .. C31 | ..         | 2.05 | Ang.  |
| PLAT432_ALERT_2_G | Short Inter X...Y Contact                        | F39 .. C31 | ..         | 2.32 | Ang.  |
| PLAT432_ALERT_2_G | Short Inter X...Y Contact                        | F40 .. C34 | ..         | 1.37 | Ang.  |
| PLAT432_ALERT_2_G | Short Inter X...Y Contact                        | F40 .. C34 | ..         | 1.51 | Ang.  |
| PLAT432_ALERT_2_G | Short Inter X...Y Contact                        | F40 .. C31 | ..         | 2.24 | Ang.  |
| PLAT432_ALERT_2_G | Short Inter X...Y Contact                        | F40 .. C31 | ..         | 2.32 | Ang.  |
| PLAT432_ALERT_2_G | Short Inter X...Y Contact                        | C31 .. C31 | ..         | 0.44 | Ang.  |
| PLAT432_ALERT_2_G | Short Inter X...Y Contact                        | C31 .. C34 | ..         | 1.46 | Ang.  |
| PLAT432_ALERT_2_G | Short Inter X...Y Contact                        | C34 .. C34 | ..         | 0.46 | Ang.  |
| PLAT764_ALERT_4_G | Overcomplete CIF Bond List Detected (Rep/Expd)   | .          |            | 1.20 | Ratio |
| PLAT811_ALERT_5_G | No ADDSYM Analysis: Too Many Excluded Atoms .... |            |            | !    | Info  |
| PLAT860_ALERT_3_G | Number of Least-Squares Restraints .....         |            |            | 75   | Note  |
| PLAT912_ALERT_4_G | Missing # of FCF Reflections Above STh/L=        | 0.600      |            | 50   | Note  |
| PLAT933_ALERT_2_G | Number of OMIT Records in Embedded .res File ... |            |            | 3    | Note  |
| PLAT978_ALERT_2_G | Number C-C Bonds with Positive Residual Density. |            |            | 7    | Note  |

---

0 **ALERT level A** = Most likely a serious problem - resolve or explain  
 1 **ALERT level B** = A potentially serious problem, consider carefully  
 6 **ALERT level C** = Check. Ensure it is not caused by an omission or oversight  
 83 **ALERT level G** = General information/check it is not something unexpected

0 ALERT type 1 CIF construction/syntax error, inconsistent or missing data  
 38 ALERT type 2 Indicator that the structure model may be wrong or deficient  
 2 ALERT type 3 Indicator that the structure quality may be low  
 48 ALERT type 4 Improvement, methodology, query or suggestion  
 2 ALERT type 5 Informative message, check

---

It is advisable to attempt to resolve as many as possible of the alerts in all categories. Often the minor alerts point to easily fixed oversights, errors and omissions in your CIF or refinement strategy, so attention to these fine details can be worthwhile. In order to resolve some of the more serious problems it may be necessary to carry out additional measurements or structure refinements. However, the purpose of your study may justify the reported deviations and the more serious of these should normally be commented upon in the discussion or experimental section of a paper or in the "special\_details" fields of the CIF. checkCIF was carefully designed to identify outliers and unusual parameters, but every test has its limitations and alerts that are not important in a particular case may appear. Conversely, the absence of alerts does not guarantee there are no aspects of the results needing attention. It is up to the individual to critically assess their own results and, if necessary, seek expert advice.

### **Publication of your CIF in IUCr journals**

A basic structural check has been run on your CIF. These basic checks will be run on all CIFs submitted for publication in IUCr journals (*Acta Crystallographica*, *Journal of Applied Crystallography*, *Journal of Synchrotron Radiation*); however, if you intend to submit to *Acta Crystallographica Section C* or *E* or *IUCrData*, you should make sure that full publication checks are run on the final version of your CIF prior to submission.

### **Publication of your CIF in other journals**

Please refer to the *Notes for Authors* of the relevant journal for any special instructions relating to CIF submission.

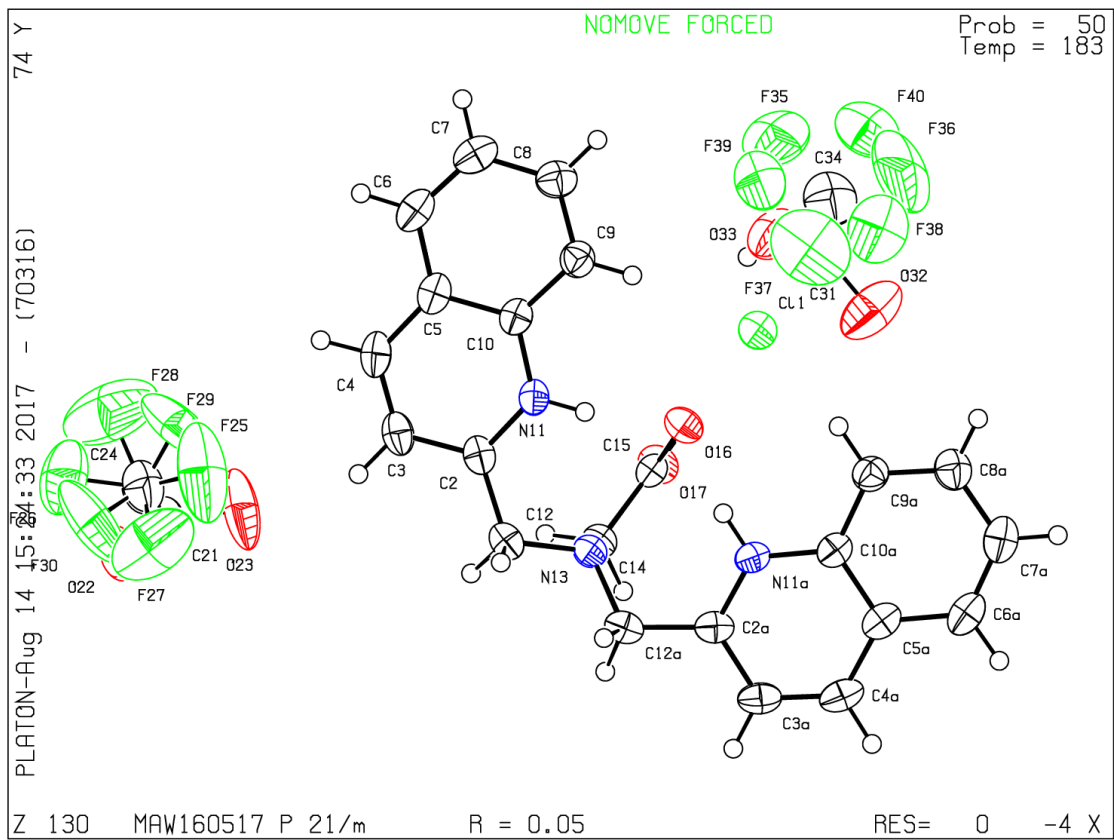

Supplement: s1 [file s1 › checkcif_MAW160517.pdf]
