# Supplementary material
Source: MDPI journal article supplement (https://www.mdpi.com/2304-6740/7/11/134)

# checkCIF/PLATON report

Structure factors have been supplied for datablock(s) maw200916

THIS REPORT IS FOR GUIDANCE ONLY. IF USED AS PART OF A REVIEW PROCEDURE FOR PUBLICATION, IT SHOULD NOT REPLACE THE EXPERTISE OF AN EXPERIENCED CRYSTALLOGRAPHIC REFEREE.

No syntax errors found.      CIF dictionary      Interpreting this report

## Datablock: maw200916

---

Bond precision:    C-C = 0.0106 Å

Wavelength=0.71073

Cell:                    a=17.6463(6)            b=9.5745(2)            c=18.6548(7)  
                          alpha=90            beta=115.083(4)        gamma=90  
Temperature:            183 K

|                | Calculated                            | Reported                 |
|----------------|---------------------------------------|--------------------------|
| Volume         | 2854.58(18)                           | 2854.58(16)              |
| Space group    | P 21                                  | P21                      |
| Hall group     | P 2yb                                 | ?                        |
| Moiety formula | 2(C26 H21 N3 O3 Re), 2(F6 P), C4 H8 O | C28 H25 F6 N3 O3.50 P Re |
| Sum formula    | C56 H50 F12 N6 O7 P2 Re2              | C56 H50 F12 N6 O7 P2 Re2 |
| Mr             | 1581.38                               | 1581.36                  |
| Dx,g cm-3      | 1.840                                 | 1.840                    |
| Z              | 2                                     | 2                        |
| Mu (mm-1)      | 4.390                                 | 4.390                    |
| F000           | 1544.0                                | 1544.0                   |
| F000'          | 1541.24                               |                          |
| h,k,lmax       | 25,13,26                              | 25,13,26                 |
| Nref           | 17400[ 9177]                          | 17390                    |
| Tmin,Tmax      | 0.412,0.674                           | 0.182,0.693              |
| Tmin'          | 0.074                                 |                          |

Correction method= # Reported T Limits: Tmin=0.182 Tmax=0.693

AbsCorr = ANALYTICAL

Data completeness= 1.89/1.00

Theta(max)= 30.510

R(reflections)= 0.0327( 15898)

wR2(reflections)= 0.0815( 17390)

S = 1.033

Npar= 752

---

The following ALERTS were generated. Each ALERT has the format

**test-name\_ALERT\_alert-type\_alert-level.**

Click on the hyperlinks for more details of the test.

### Alert level C

|                   |                                                  |         |        |
|-------------------|--------------------------------------------------|---------|--------|
| PLAT202_ALERT_3_C | Isotropic non-H Atoms in Anion/Solvent .....     | 6       | Check  |
| PLAT220_ALERT_2_C | Non-Solvent Resd 1 C Ueq(max)/Ueq(min) Range     | 3.4     | Ratio  |
| PLAT234_ALERT_4_C | Large Hirshfeld Difference C19 -- C20 ..         | 0.20    | Ang.   |
| PLAT234_ALERT_4_C | Large Hirshfeld Difference C39 -- C40 ..         | 0.16    | Ang.   |
| PLAT234_ALERT_4_C | Large Hirshfeld Difference P2 -- F4 ..           | 0.16    | Ang.   |
| PLAT241_ALERT_2_C | High 'MainMol' Ueq as Compared to Neighbors of   | C14     | Check  |
| PLAT241_ALERT_2_C | High 'MainMol' Ueq as Compared to Neighbors of   | C17     | Check  |
| PLAT241_ALERT_2_C | High 'MainMol' Ueq as Compared to Neighbors of   | C20     | Check  |
| PLAT243_ALERT_4_C | High 'Solvent' Ueq as Compared to Neighbors of   | O61     | Check  |
| PLAT243_ALERT_4_C | High 'Solvent' Ueq as Compared to Neighbors of   | C63     | Check  |
| PLAT244_ALERT_4_C | Low 'Solvent' Ueq as Compared to Neighbors of    | C62     | Check  |
| PLAT244_ALERT_4_C | Low 'Solvent' Ueq as Compared to Neighbors of    | C64     | Check  |
| PLAT250_ALERT_2_C | Large U3/U1 Ratio for Average U(i,j) Tensor .... | 3.1     | Note   |
| PLAT342_ALERT_3_C | Low Bond Precision on C-C Bonds .....            | 0.01057 | Ang.   |
| PLAT397_ALERT_2_C | Deviating C-O-C Angle from 120 Deg for O61       | 108.3   | Degree |
| PLAT430_ALERT_2_C | Short Inter D...A Contact O2 .. O32 ..           | 2.90    | Ang.   |
| PLAT971_ALERT_2_C | Check Calcd Residual Density 0.72A From Rel      | 1.61    | eA-3   |
| PLAT973_ALERT_2_C | Check Calcd Positive Residual Density on Rel     | 1.17    | eA-3   |
| PLAT978_ALERT_2_C | Number C-C Bonds with Positive Residual Density. | 0       | Note   |

### Alert level G

FORMU01\_ALERT\_1\_G There is a discrepancy between the atom counts in the  
 \_chemical\_formula\_sum and \_chemical\_formula\_moiety. This is  
 usually due to the moiety formula being in the wrong format.  
 Atom count from \_chemical\_formula\_sum: C56 H50 F12 N6 O7 P2 Re2  
 Atom count from \_chemical\_formula\_moiety: C28 H25 F6 N3 O3.5 P1 Re1

|                   |                                                  |       |              |
|-------------------|--------------------------------------------------|-------|--------------|
| PLAT002_ALERT_2_G | Number of Distance or Angle Restraints on AtSite | 9     | Note         |
| PLAT005_ALERT_5_G | No Embedded Refinement Details found in the CIF  |       | Please Do !  |
| PLAT042_ALERT_1_G | Calc. and Reported MoietyFormula Strings Differ  |       | Please Check |
| PLAT152_ALERT_1_G | The Supplied and Calc. Volume s.u. Differ by ... | 2     | Units        |
| PLAT232_ALERT_2_G | Hirshfeld Test Diff (M-X) Re1 -- C1 ..           | 6.5   | s.u.         |
| PLAT232_ALERT_2_G | Hirshfeld Test Diff (M-X) Re2 -- C31 ..          | 6.5   | s.u.         |
| PLAT244_ALERT_4_G | Low 'Solvent' Ueq as Compared to Neighbors of    | P1    | Check        |
| PLAT244_ALERT_4_G | Low 'Solvent' Ueq as Compared to Neighbors of    | P2    | Check        |
| PLAT300_ALERT_4_G | Atom Site Occupancy of >F9 is Constrained at     | 0.6   | Check        |
| PLAT300_ALERT_4_G | Atom Site Occupancy of >F10 is Constrained at    | 0.6   | Check        |
| PLAT300_ALERT_4_G | Atom Site Occupancy of >F11 is Constrained at    | 0.6   | Check        |
| PLAT300_ALERT_4_G | Atom Site Occupancy of >F12 is Constrained at    | 0.6   | Check        |
| PLAT300_ALERT_4_G | Atom Site Occupancy of <F9B is Constrained at    | 0.4   | Check        |
| PLAT300_ALERT_4_G | Atom Site Occupancy of <F10B is Constrained at   | 0.4   | Check        |
| PLAT300_ALERT_4_G | Atom Site Occupancy of <F11B is Constrained at   | 0.4   | Check        |
| PLAT300_ALERT_4_G | Atom Site Occupancy of <F12B is Constrained at   | 0.4   | Check        |
| PLAT302_ALERT_4_G | Anion/Solvent/Minor-Residue Disorder (Resd 3)..  | 57 %  | Note         |
| PLAT710_ALERT_4_G | Delete 1-2-3 or 2-3-4 Linear Torsion Angle ... # | 1     | Do !         |
|                   | C1 -RE1 -N1 -C14 139.40 1.90 1.555 1.555 1.555   | 1.555 |              |
| PLAT710_ALERT_4_G | Delete 1-2-3 or 2-3-4 Linear Torsion Angle ... # | 6     | Do !         |
|                   | C1 -RE1 -N1 -C4 22.00 2.00 1.555 1.555 1.555     | 1.555 |              |
| PLAT710_ALERT_4_G | Delete 1-2-3 or 2-3-4 Linear Torsion Angle ... # | 11    | Do !         |
|                   | C1 -RE1 -N1 -C24 -97.00 2.00 1.555 1.555 1.555   | 1.555 |              |
| PLAT710_ALERT_4_G | Delete 1-2-3 or 2-3-4 Linear Torsion Angle ... # | 18    | Do !         |
|                   | C2 -RE1 -N2 -C5 47.40 1.40 1.555 1.555 1.555     | 1.555 |              |
| PLAT710_ALERT_4_G | Delete 1-2-3 or 2-3-4 Linear Torsion Angle ... # | 23    | Do !         |
|                   | C2 -RE1 -N2 -C13 -135.70 1.20 1.555 1.555 1.555  | 1.555 |              |
| PLAT710_ALERT_4_G | Delete 1-2-3 or 2-3-4 Linear Torsion Angle ... # | 27    | Do !         |

|                   |        |       |          |         |         |           |       |       |       |
|-------------------|--------|-------|----------|---------|---------|-----------|-------|-------|-------|
| C3                | -RE1   | -N3   | -C15     | 1.50    | 1.40    | 1.555     | 1.555 | 1.555 | 1.555 |
| PLAT710_ALERT_4_G | Delete | 1-2-3 | or 2-3-4 | Linear  | Torsion | Angle ... | #     | 32    | Do !  |
| C3                | -RE1   | -N3   | -C23     | 174.80  | 1.10    | 1.555     | 1.555 | 1.555 | 1.555 |
| PLAT710_ALERT_4_G | Delete | 1-2-3 | or 2-3-4 | Linear  | Torsion | Angle ... | #     | 37    | Do !  |
| C31               | -RE2   | -N31  | -C34     | 19.00   | 2.00    | 1.555     | 1.555 | 1.555 | 1.555 |
| PLAT710_ALERT_4_G | Delete | 1-2-3 | or 2-3-4 | Linear  | Torsion | Angle ... | #     | 42    | Do !  |
| C31               | -RE2   | -N31  | -C44     | -99.00  | 2.00    | 1.555     | 1.555 | 1.555 | 1.555 |
| PLAT710_ALERT_4_G | Delete | 1-2-3 | or 2-3-4 | Linear  | Torsion | Angle ... | #     | 47    | Do !  |
| C31               | -RE2   | -N31  | -C54     | 137.00  | 2.00    | 1.555     | 1.555 | 1.555 | 1.555 |
| PLAT710_ALERT_4_G | Delete | 1-2-3 | or 2-3-4 | Linear  | Torsion | Angle ... | #     | 51    | Do !  |
| C32               | -RE2   | -N32  | -C45     | 17.40   | 1.60    | 1.555     | 1.555 | 1.555 | 1.555 |
| PLAT710_ALERT_4_G | Delete | 1-2-3 | or 2-3-4 | Linear  | Torsion | Angle ... | #     | 56    | Do !  |
| C32               | -RE2   | -N32  | -C53     | -150.90 | 1.40    | 1.555     | 1.555 | 1.555 | 1.555 |
| PLAT710_ALERT_4_G | Delete | 1-2-3 | or 2-3-4 | Linear  | Torsion | Angle ... | #     | 63    | Do !  |
| C33               | -RE2   | -N33  | -C35     | -20.90  | 1.30    | 1.555     | 1.555 | 1.555 | 1.555 |
| PLAT710_ALERT_4_G | Delete | 1-2-3 | or 2-3-4 | Linear  | Torsion | Angle ... | #     | 68    | Do !  |
| C33               | -RE2   | -N33  | -C43     | 163.00  | 1.10    | 1.555     | 1.555 | 1.555 | 1.555 |
| PLAT710_ALERT_4_G | Delete | 1-2-3 | or 2-3-4 | Linear  | Torsion | Angle ... | #     | 71    | Do !  |
| C3                | -RE1   | -C1   | -O1      | 19.00   | 5.00    | 1.555     | 1.555 | 1.555 | 1.555 |
| PLAT710_ALERT_4_G | Delete | 1-2-3 | or 2-3-4 | Linear  | Torsion | Angle ... | #     | 72    | Do !  |
| C2                | -RE1   | -C1   | -O1      | -70.00  | 5.00    | 1.555     | 1.555 | 1.555 | 1.555 |
| PLAT710_ALERT_4_G | Delete | 1-2-3 | or 2-3-4 | Linear  | Torsion | Angle ... | #     | 73    | Do !  |
| N1                | -RE1   | -C1   | -O1      | 58.00   | 6.00    | 1.555     | 1.555 | 1.555 | 1.555 |
| PLAT710_ALERT_4_G | Delete | 1-2-3 | or 2-3-4 | Linear  | Torsion | Angle ... | #     | 74    | Do !  |
| N3                | -RE1   | -C1   | -O1      | -162.00 | 5.00    | 1.555     | 1.555 | 1.555 | 1.555 |
| PLAT710_ALERT_4_G | Delete | 1-2-3 | or 2-3-4 | Linear  | Torsion | Angle ... | #     | 75    | Do !  |
| N2                | -RE1   | -C1   | -O1      | 113.00  | 5.00    | 1.555     | 1.555 | 1.555 | 1.555 |
| PLAT710_ALERT_4_G | Delete | 1-2-3 | or 2-3-4 | Linear  | Torsion | Angle ... | #     | 76    | Do !  |
| C1                | -RE1   | -C2   | -O2      | 16.00   | 0.00    | 1.555     | 1.555 | 1.555 | 1.555 |
| PLAT710_ALERT_4_G | Delete | 1-2-3 | or 2-3-4 | Linear  | Torsion | Angle ... | #     | 77    | Do !  |
| C3                | -RE1   | -C2   | -O2      | 12.00   | 0.00    | 1.555     | 1.555 | 1.555 | 1.555 |
| PLAT710_ALERT_4_G | Delete | 1-2-3 | or 2-3-4 | Linear  | Torsion | Angle ... | #     | 78    | Do !  |
| N1                | -RE1   | -C2   | -O2      | 2.00    | 0.00    | 1.555     | 1.555 | 1.555 | 1.555 |
| PLAT710_ALERT_4_G | Delete | 1-2-3 | or 2-3-4 | Linear  | Torsion | Angle ... | #     | 79    | Do !  |
| N3                | -RE1   | -C2   | -O2      | 6.00    | 0.00    | 1.555     | 1.555 | 1.555 | 1.555 |
| PLAT710_ALERT_4_G | Delete | 1-2-3 | or 2-3-4 | Linear  | Torsion | Angle ... | #     | 80    | Do !  |
| N2                | -RE1   | -C2   | -O2      | 0.00    | 0.00    | 1.555     | 1.555 | 1.555 | 1.555 |
| PLAT710_ALERT_4_G | Delete | 1-2-3 | or 2-3-4 | Linear  | Torsion | Angle ... | #     | 81    | Do !  |
| C1                | -RE1   | -C3   | -O3      | -141.00 | 19.00   | 1.555     | 1.555 | 1.555 | 1.555 |
| PLAT710_ALERT_4_G | Delete | 1-2-3 | or 2-3-4 | Linear  | Torsion | Angle ... | #     | 82    | Do !  |
| C2                | -RE1   | -C3   | -O3      | -54.00  | 19.00   | 1.555     | 1.555 | 1.555 | 1.555 |
| PLAT710_ALERT_4_G | Delete | 1-2-3 | or 2-3-4 | Linear  | Torsion | Angle ... | #     | 83    | Do !  |
| N1                | -RE1   | -C3   | -O3      | 42.00   | 19.00   | 1.555     | 1.555 | 1.555 | 1.555 |
| PLAT710_ALERT_4_G | Delete | 1-2-3 | or 2-3-4 | Linear  | Torsion | Angle ... | #     | 84    | Do !  |
| N3                | -RE1   | -C3   | -O3      | 48.00   | 19.00   | 1.555     | 1.555 | 1.555 | 1.555 |
| PLAT710_ALERT_4_G | Delete | 1-2-3 | or 2-3-4 | Linear  | Torsion | Angle ... | #     | 85    | Do !  |
| N2                | -RE1   | -C3   | -O3      | 118.00  | 19.00   | 1.555     | 1.555 | 1.555 | 1.555 |
| PLAT710_ALERT_4_G | Delete | 1-2-3 | or 2-3-4 | Linear  | Torsion | Angle ... | #     | 148   | Do !  |
| C32               | -RE2   | -C31  | -O31     | -26.00  | 7.00    | 1.555     | 1.555 | 1.555 | 1.555 |
| PLAT710_ALERT_4_G | Delete | 1-2-3 | or 2-3-4 | Linear  | Torsion | Angle ... | #     | 149   | Do !  |
| C33               | -RE2   | -C31  | -O31     | 63.00   | 7.00    | 1.555     | 1.555 | 1.555 | 1.555 |
| PLAT710_ALERT_4_G | Delete | 1-2-3 | or 2-3-4 | Linear  | Torsion | Angle ... | #     | 150   | Do !  |
| N32               | -RE2   | -C31  | -O31     | 159.00  | 7.00    | 1.555     | 1.555 | 1.555 | 1.555 |
| PLAT710_ALERT_4_G | Delete | 1-2-3 | or 2-3-4 | Linear  | Torsion | Angle ... | #     | 151   | Do !  |
| N33               | -RE2   | -C31  | -O31     | -116.00 | 7.00    | 1.555     | 1.555 | 1.555 | 1.555 |
| PLAT710_ALERT_4_G | Delete | 1-2-3 | or 2-3-4 | Linear  | Torsion | Angle ... | #     | 152   | Do !  |
| N31               | -RE2   | -C31  | -O31     | -97.00  | 7.00    | 1.555     | 1.555 | 1.555 | 1.555 |
| PLAT710_ALERT_4_G | Delete | 1-2-3 | or 2-3-4 | Linear  | Torsion | Angle ... | #     | 153   | Do !  |
| C31               | -RE2   | -C32  | -O32     | 53.00   | 18.00   | 1.555     | 1.555 | 1.555 | 1.555 |
| PLAT710_ALERT_4_G | Delete | 1-2-3 | or 2-3-4 | Linear  | Torsion | Angle ... | #     | 154   | Do !  |
| C33               | -RE2   | -C32  | -O32     | -34.00  | 18.00   | 1.555     | 1.555 | 1.555 | 1.555 |
| PLAT710_ALERT_4_G | Delete | 1-2-3 | or 2-3-4 | Linear  | Torsion | Angle ... | #     | 155   | Do !  |

|                                                                    |         |       |       |       |       |       |            |
|--------------------------------------------------------------------|---------|-------|-------|-------|-------|-------|------------|
| N32 -RE2 -C32 -O32                                                 | -160.00 | 17.00 | 1.555 | 1.555 | 1.555 | 1.555 |            |
| PLAT710_ALERT_4_G Delete 1-2-3 or 2-3-4 Linear Torsion Angle ... # |         |       |       |       |       |       | 156 Do !   |
| N33 -RE2 -C32 -O32                                                 | 154.00  | 18.00 | 1.555 | 1.555 | 1.555 | 1.555 |            |
| PLAT710_ALERT_4_G Delete 1-2-3 or 2-3-4 Linear Torsion Angle ... # |         |       |       |       |       |       | 157 Do !   |
| N31 -RE2 -C32 -O32                                                 | -132.00 | 18.00 | 1.555 | 1.555 | 1.555 | 1.555 |            |
| PLAT710_ALERT_4_G Delete 1-2-3 or 2-3-4 Linear Torsion Angle ... # |         |       |       |       |       |       | 158 Do !   |
| C32 -RE2 -C33 -O33                                                 | 4.00    | 11.00 | 1.555 | 1.555 | 1.555 | 1.555 |            |
| PLAT710_ALERT_4_G Delete 1-2-3 or 2-3-4 Linear Torsion Angle ... # |         |       |       |       |       |       | 159 Do !   |
| C31 -RE2 -C33 -O33                                                 | -80.00  | 11.00 | 1.555 | 1.555 | 1.555 | 1.555 |            |
| PLAT710_ALERT_4_G Delete 1-2-3 or 2-3-4 Linear Torsion Angle ... # |         |       |       |       |       |       | 160 Do !   |
| N32 -RE2 -C33 -O33                                                 | 18.00   | 0.00  | 1.555 | 1.555 | 1.555 | 1.555 |            |
| PLAT710_ALERT_4_G Delete 1-2-3 or 2-3-4 Linear Torsion Angle ... # |         |       |       |       |       |       | 161 Do !   |
| N33 -RE2 -C33 -O33                                                 | 93.00   | 11.00 | 1.555 | 1.555 | 1.555 | 1.555 |            |
| PLAT710_ALERT_4_G Delete 1-2-3 or 2-3-4 Linear Torsion Angle ... # |         |       |       |       |       |       | 162 Do !   |
| N31 -RE2 -C33 -O33                                                 | 98.00   | 11.00 | 1.555 | 1.555 | 1.555 | 1.555 |            |
| PLAT779_ALERT_4_G Suspect or Irrelevant (Bond) Angle in CIF .... # |         |       |       |       |       |       | 36 Check   |
| F9B -P1 -F12                                                       | 1.555   | 1.555 | 1.555 |       |       |       | 36.80 Deg. |
| PLAT779_ALERT_4_G Suspect or Irrelevant (Bond) Angle in CIF .... # |         |       |       |       |       |       | 47 Check   |
| F12B -P1 -F9                                                       | 1.555   | 1.555 | 1.555 |       |       |       | 28.20 Deg. |
| PLAT779_ALERT_4_G Suspect or Irrelevant (Bond) Angle in CIF .... # |         |       |       |       |       |       | 52 Check   |
| F11 -P1 -F11B                                                      | 1.555   | 1.555 | 1.555 |       |       |       | 30.70 Deg. |
| PLAT790_ALERT_4_G Centre of Gravity not Within Unit Cell: Resd. #  |         |       |       |       |       |       | 3 Note     |
| F6 P                                                               |         |       |       |       |       |       |            |
| PLAT790_ALERT_4_G Centre of Gravity not Within Unit Cell: Resd. #  |         |       |       |       |       |       | 4 Note     |
| F6 P                                                               |         |       |       |       |       |       |            |
| PLAT790_ALERT_4_G Centre of Gravity not Within Unit Cell: Resd. #  |         |       |       |       |       |       | 5 Note     |
| C4 H8 O                                                            |         |       |       |       |       |       |            |
| PLAT860_ALERT_3_G Number of Least-Squares Restraints .....         |         |       |       |       |       |       | 19 Note    |
| PLAT899_ALERT_4_G SHELXL97 is Deprecated and Succeeded by SHELXL   |         |       |       |       |       |       | 2014 Note  |
| PLAT910_ALERT_3_G Missing # of FCF Reflection(s) Below Theta(Min)  |         |       |       |       |       |       | 4 Note     |

---

0 **ALERT level A** = Most likely a serious problem - resolve or explain  
 0 **ALERT level B** = A potentially serious problem, consider carefully  
 19 **ALERT level C** = Check. Ensure it is not caused by an omission or oversight  
 71 **ALERT level G** = General information/check it is not something unexpected

3 **ALERT type 1** CIF construction/syntax error, inconsistent or missing data  
 13 **ALERT type 2** Indicator that the structure model may be wrong or deficient  
 4 **ALERT type 3** Indicator that the structure quality may be low  
 69 **ALERT type 4** Improvement, methodology, query or suggestion  
 1 **ALERT type 5** Informative message, check

---

It is advisable to attempt to resolve as many as possible of the alerts in all categories. Often the minor alerts point to easily fixed oversights, errors and omissions in your CIF or refinement strategy, so attention to these fine details can be worthwhile. In order to resolve some of the more serious problems it may be necessary to carry out additional measurements or structure refinements. However, the purpose of your study may justify the reported deviations and the more serious of these should normally be commented upon in the discussion or experimental section of a paper or in the "special\_details" fields of the CIF. checkCIF was carefully designed to identify outliers and unusual parameters, but every test has its limitations and alerts that are not important in a particular case may appear. Conversely, the absence of alerts does not guarantee there are no aspects of the results needing attention. It is up to the individual to critically assess their own results and, if necessary, seek expert advice.

### **Publication of your CIF in IUCr journals**

A basic structural check has been run on your CIF. These basic checks will be run on all CIFs submitted for publication in IUCr journals (*Acta Crystallographica*, *Journal of Applied Crystallography*, *Journal of Synchrotron Radiation*); however, if you intend to submit to *Acta Crystallographica Section C* or *E* or *IUCrData*, you should make sure that full publication checks are run on the final version of your CIF prior to submission.

### **Publication of your CIF in other journals**

Please refer to the *Notes for Authors* of the relevant journal for any special instructions relating to CIF submission.

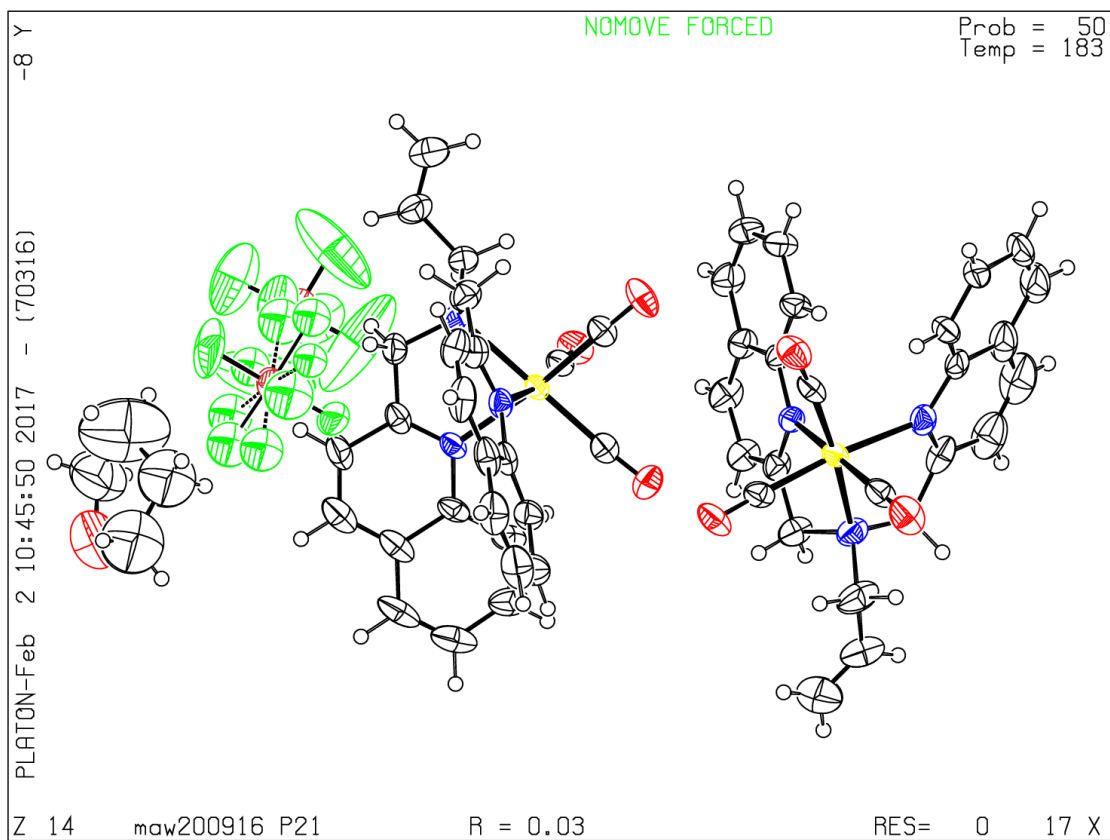

Supplement: s1 [file s1 › checkcif_maw200916.pdf]
