# Supplementary material
Source: MDPI journal article supplement (https://www.mdpi.com/2304-6740/7/11/134)
Supplement: s1 [file s1]

Archive with 8 entries (8 files):
- checkcif_MAW160517.pdf
- checkcif_maw160817.pdf
- checkcif_maw200916.pdf
- checkcif_maw281116.pdf
- MAW160517.cif
- maw160817.cif
- maw200916.cif
- maw281116.cif
