# Supplementary material
Source: MDPI journal article supplement (https://www.mdpi.com/2304-6740/7/11/134)
Supplement: s1 [file s1 › MAW160517.cif]

 
data_MAW160517
 
_audit_creation_method            'SHELXL-2014/7'
_shelx_SHELXL_version_number      '2014/7'
_chemical_name_systematic         ?
_chemical_name_common             ?
_chemical_melting_point           ?
_chemical_formula_moiety          ?
_chemical_formula_sum
 'C28 H23 Cl F9 N3 O8' 
_chemical_formula_weight          735.94

loop_
 _atom_type_symbol
 _atom_type_description
 _atom_type_scat_dispersion_real
 _atom_type_scat_dispersion_imag
 _atom_type_scat_source
 'C'  'C'   0.0181   0.0091
 'International Tables Vol C Tables 4.2.6.8 and 6.1.1.4'
 'H'  'H'   0.0000   0.0000
 'International Tables Vol C Tables 4.2.6.8 and 6.1.1.4'
 'F'  'F'   0.0727   0.0534
 'International Tables Vol C Tables 4.2.6.8 and 6.1.1.4'
 'N'  'N'   0.0311   0.0180
 'International Tables Vol C Tables 4.2.6.8 and 6.1.1.4'
 'O'  'O'   0.0492   0.0322
 'International Tables Vol C Tables 4.2.6.8 and 6.1.1.4'
 'Cl'  'Cl'   0.3639   0.7018
 'International Tables Vol C Tables 4.2.6.8 and 6.1.1.4'
 
_space_group_crystal_system       monoclinic
_space_group_IT_number            11
_space_group_name_H-M_alt         'P 21/m'
_space_group_name_Hall            '-P 2yb'
 
_shelx_space_group_comment
;
The symmetry employed for this shelxl refinement is uniquely defined
by the following loop, which should always be used as a source of
symmetry information in preference to the above space-group names.
They are only intended as comments.
;
 
loop_
 _space_group_symop_operation_xyz
 'x, y, z'
 '-x, y+1/2, -z'
 '-x, -y, -z'
 'x, -y-1/2, z'
 
_cell_length_a                    7.06950(10)
_cell_length_b                    18.0623(2)
_cell_length_c                    12.10560(10)
_cell_angle_alpha                 90
_cell_angle_beta                  97.1050(10)
_cell_angle_gamma                 90
_cell_volume                      1533.91(3)
_cell_formula_units_Z             2
_cell_measurement_temperature     183(2)
_cell_measurement_reflns_used     13815
_cell_measurement_theta_min       3.681
_cell_measurement_theta_max       78.693
 
_exptl_crystal_description        plate
_exptl_crystal_colour             brown
_exptl_crystal_density_meas       ?
_exptl_crystal_density_method     ?
_exptl_crystal_density_diffrn     1.593          
_exptl_crystal_F_000              748
_exptl_transmission_factor_min    ?
_exptl_transmission_factor_max    ?
_exptl_crystal_size_max           0.250
_exptl_crystal_size_mid           0.100
_exptl_crystal_size_min           0.050
_exptl_absorpt_coefficient_mu     2.113
_shelx_estimated_absorpt_T_min    0.620
_shelx_estimated_absorpt_T_max    0.902
_exptl_absorpt_correction_type    'multi-scan'
_exptl_absorpt_correction_T_min   0.81799
_exptl_absorpt_correction_T_max   1.00000
_exptl_absorpt_process_details
;
CrysAlisPro 1.171.39.27e (Rigaku Oxford Diffraction, 2015)
Empirical absorption correction using spherical harmonics,
 implemented in SCALE3 ABSPACK scaling algorithm.
;
_exptl_absorpt_special_details    ?
_diffrn_ambient_temperature       183(2)
_diffrn_radiation_wavelength      1.54184
_diffrn_radiation_type            CuK\a
_diffrn_radiation_source          'micro-focus sealed X-ray tube'
_diffrn_measurement_device_type   'XtaLAB Synergy, Dualflex, Pilatus 200K'
_diffrn_measurement_method        '\w scans'
_diffrn_detector_area_resol_mean  ?
_diffrn_reflns_number             20113
_diffrn_reflns_av_unetI/netI      0.0155
_diffrn_reflns_av_R_equivalents   0.0258
_diffrn_reflns_limit_h_min        -9
_diffrn_reflns_limit_h_max        7
_diffrn_reflns_limit_k_min        -21
_diffrn_reflns_limit_k_max        22
_diffrn_reflns_limit_l_min        -12
_diffrn_reflns_limit_l_max        15
_diffrn_reflns_theta_min          3.680
_diffrn_reflns_theta_max          78.949
_diffrn_reflns_theta_full         67.684
_diffrn_measured_fraction_theta_max   0.985
_diffrn_measured_fraction_theta_full  0.999
_diffrn_reflns_Laue_measured_fraction_max    0.985
_diffrn_reflns_Laue_measured_fraction_full   0.999
_diffrn_reflns_point_group_measured_fraction_max   0.985
_diffrn_reflns_point_group_measured_fraction_full  0.999
_reflns_number_total              3361
_reflns_number_gt                 3028
_reflns_threshold_expression      'I > 2\s(I)'
_reflns_Friedel_coverage          0.000
_reflns_Friedel_fraction_max      .
_reflns_Friedel_fraction_full     .
 
_reflns_special_details
;
 Reflections were merged by SHELXL according to the crystal
 class for the calculation of statistics and refinement.
 
 _reflns_Friedel_fraction is defined as the number of unique
 Friedel pairs measured divided by the number that would be
 possible theoretically, ignoring centric projections and
 systematic absences.
;
 
_computing_data_collection        'CrysAlis PRO (Rigaku, 2017)' 
_computing_cell_refinement        'CrysAlis PRO (Rigaku, 2017)' 
_computing_data_reduction         'CrysAlis PRO (Rigaku, 2017)' 
_computing_structure_solution     'SIR-97 (Altomare, 1999)'
_computing_structure_refinement 'SHELXL-2014/7 (Sheldrick, 2014)'
_computing_molecular_graphics     'ORTEP-3 (Farrugia, 1997)' 
_computing_publication_material 'SHELXL-2014/7 (Sheldrick, 2014)'
_refine_special_details           ?
_refine_ls_structure_factor_coef  Fsqd
_refine_ls_matrix_type            full
_refine_ls_weighting_scheme       calc
_refine_ls_weighting_details
'w=1/[\s^2^(Fo^2^)+(0.0786P)^2^+0.7520P] where P=(Fo^2^+2Fc^2^)/3'
_atom_sites_solution_primary      ?
_atom_sites_solution_secondary    ?
_atom_sites_solution_hydrogens    mixed
_refine_ls_hydrogen_treatment     mixed
_refine_ls_extinction_method      none
_refine_ls_extinction_coef        .
_refine_ls_number_reflns          3361
_refine_ls_number_parameters      317
_refine_ls_number_restraints      75
_refine_ls_R_factor_all           0.0534
_refine_ls_R_factor_gt            0.0480
_refine_ls_wR_factor_ref          0.1428
_refine_ls_wR_factor_gt           0.1391
_refine_ls_goodness_of_fit_ref    1.066
_refine_ls_restrained_S_all       1.113
_refine_ls_shift/su_max           0.001
_refine_ls_shift/su_mean          0.000
 
loop_
 _atom_site_label
 _atom_site_type_symbol
 _atom_site_fract_x
 _atom_site_fract_y
 _atom_site_fract_z
 _atom_site_U_iso_or_equiv
 _atom_site_adp_type
 _atom_site_occupancy
 _atom_site_site_symmetry_order  
 _atom_site_calc_flag
 _atom_site_refinement_flags_posn
 _atom_site_refinement_flags_adp
 _atom_site_refinement_flags_occupancy
 _atom_site_disorder_assembly
 _atom_site_disorder_group
C2 C 0.7660(2) 0.61622(10) 0.31011(14) 0.0325(4) Uani 1 1 d . . . . .
C3 C 0.7616(3) 0.54421(11) 0.26689(15) 0.0395(4) Uani 1 1 d . . . . .
H3 H 0.7622 0.5366 0.1893 0.047 Uiso 1 1 calc R U . . .
C4 C 0.7563(3) 0.48499(11) 0.33641(17) 0.0409(4) Uani 1 1 d . . . . .
H4 H 0.7550 0.4362 0.3069 0.049 Uiso 1 1 calc R U . . .
C5 C 0.7528(2) 0.49535(9) 0.45173(15) 0.0351(4) Uani 1 1 d . . . . .
C6 C 0.7466(3) 0.43632(10) 0.52815(18) 0.0422(4) Uani 1 1 d . . . . .
H6 H 0.7464 0.3866 0.5027 0.051 Uiso 1 1 calc R U . . .
C7 C 0.7408(3) 0.45093(11) 0.63859(18) 0.0435(4) Uani 1 1 d . . . . .
H7 H 0.7368 0.4111 0.6895 0.052 Uiso 1 1 calc R U . . .
C8 C 0.7408(3) 0.52435(11) 0.67744(16) 0.0421(4) Uani 1 1 d . . . . .
H8 H 0.7354 0.5333 0.7543 0.050 Uiso 1 1 calc R U . . .
C9 C 0.7484(2) 0.58318(10) 0.60656(15) 0.0366(4) Uani 1 1 d . . . . .
H9 H 0.7493 0.6326 0.6336 0.044 Uiso 1 1 calc R U . . .
C10 C 0.7548(2) 0.56867(9) 0.49291(14) 0.0313(3) Uani 1 1 d . . . . .
C12 C 0.7851(2) 0.68306(10) 0.23917(14) 0.0359(4) Uani 1 1 d . . . . .
H12A H 0.9217 0.6913 0.2325 0.043 Uiso 1 1 calc R U . . .
H12B H 0.7189 0.6736 0.1636 0.043 Uiso 1 1 calc R U . . .
C14 C 0.4964(3) 0.7500 0.26896(19) 0.0321(5) Uani 1 2 d S T P . .
H14A H 0.4505 0.7057 0.2255 0.038 Uiso 0.5 1 calc R U P . .
H14B H 0.4505 0.7943 0.2255 0.038 Uiso 0.5 1 calc R U P . .
C15 C 0.4123(3) 0.7500 0.37750(19) 0.0298(5) Uani 1 2 d S T P . .
C21 C 0.7005(3) 0.41981(13) -0.02789(17) 0.0515(5) Uani 1 1 d . . . . .
C24 C 0.8900(4) 0.38447(16) 0.0186(2) 0.0668(7) Uani 1 1 d . . . . .
C31 C 0.4460(7) 0.7623(3) 0.7658(5) 0.0635(16) Uani 0.5 1 d D U P B .
C34 C 0.6007(7) 0.7372(5) 0.8570(4) 0.0751(18) Uani 0.5 1 d D U P . .
F25 F 0.9178(12) 0.3766(7) 0.1204(4) 0.122(4) Uani 0.5 1 d . . P A 1
F26 F 0.9173(11) 0.3208(3) -0.0306(6) 0.111(2) Uani 0.5 1 d . . P A 1
F27 F 1.0392(8) 0.4239(4) -0.0131(11) 0.143(3) Uani 0.5 1 d . . P A 1
F28 F 0.8448(11) 0.3197(5) 0.0689(13) 0.176(4) Uani 0.5 1 d . . P A 2
F29 F 0.9804(11) 0.4214(6) 0.0978(8) 0.143(4) Uani 0.5 1 d . . P A 2
F30 F 0.9927(8) 0.3660(8) -0.0454(4) 0.136(3) Uani 0.5 1 d . . P A 2
F35 F 0.6052(11) 0.6644(4) 0.8812(7) 0.106(2) Uani 0.35 1 d D U P B 3
F36 F 0.6039(16) 0.7749(6) 0.9461(6) 0.150(5) Uani 0.35 1 d D U P B 3
F37 F 0.7729(6) 0.7500 0.8147(5) 0.133(2) Uani 0.7 2 d DS TU P B 3
F38 F 0.7280(18) 0.7898(7) 0.8831(16) 0.096(4) Uani 0.15 1 d D U P B 4
F39 F 0.675(2) 0.6756(8) 0.8321(10) 0.081(4) Uani 0.15 1 d D U P B 4
F40 F 0.513(2) 0.7268(10) 0.9509(12) 0.091(5) Uani 0.15 1 d D U P B 4
N11 N 0.76197(19) 0.62561(8) 0.41869(11) 0.0308(3) Uani 1 1 d . . . . .
H11A H 0.7640 0.6712 0.4445 0.037 Uiso 1 1 calc R U . . .
N13 N 0.7064(3) 0.7500 0.28378(16) 0.0302(4) Uani 1 2 d S T P . .
O16 O 0.5028(2) 0.7500 0.46899(14) 0.0377(4) Uani 1 2 d S T P . .
O17 O 0.2235(2) 0.7500 0.35920(15) 0.0393(4) Uani 1 2 d DS T P . .
H17 H 0.176(5) 0.7500 0.421(2) 0.059 Uiso 1 2 d DS U P . .
O22 O 0.6253(3) 0.40048(11) -0.11712(14) 0.0721(5) Uani 1 1 d . . . . .
O23 O 0.6462(3) 0.46779(15) 0.03543(19) 0.0980(9) Uani 1 1 d . . . . .
H23 H 0.5294 0.4760 0.0178 0.147 Uiso 0.5 1 calc R U P . .
O32 O 0.4400(7) 0.8266(2) 0.7407(5) 0.0952(15) Uani 0.5 1 d D U P . .
O33 O 0.3377(6) 0.7128(2) 0.7303(3) 0.0736(10) Uani 0.5 1 d D U P . .
H33 H 0.2652 0.7046 0.6713 0.110 Uiso 0.5 1 calc R U P B .
Cl1 Cl 0.01220(8) 0.7500 0.55714(5) 0.03899(19) Uani 1 2 d S T P . .
 
loop_
 _atom_site_aniso_label
 _atom_site_aniso_U_11
 _atom_site_aniso_U_22
 _atom_site_aniso_U_33
 _atom_site_aniso_U_23
 _atom_site_aniso_U_13
 _atom_site_aniso_U_12
C2 0.0251(7) 0.0389(9) 0.0322(8) -0.0066(7) -0.0018(6) 0.0045(6)
C3 0.0360(9) 0.0444(10) 0.0367(9) -0.0136(8) -0.0010(7) 0.0020(7)
C4 0.0361(9) 0.0359(9) 0.0492(10) -0.0152(8) -0.0009(7) 0.0019(7)
C5 0.0246(7) 0.0320(8) 0.0472(10) -0.0054(7) -0.0022(6) 0.0013(6)
C6 0.0344(9) 0.0295(8) 0.0609(12) 0.0004(8) -0.0016(8) 0.0006(7)
C7 0.0340(9) 0.0387(10) 0.0560(11) 0.0107(8) -0.0015(8) -0.0023(7)
C8 0.0388(9) 0.0456(10) 0.0404(9) 0.0043(8) -0.0008(7) -0.0024(8)
C9 0.0376(9) 0.0353(9) 0.0359(9) -0.0018(7) -0.0001(7) -0.0002(7)
C10 0.0248(7) 0.0304(8) 0.0372(8) -0.0018(6) -0.0024(6) 0.0022(6)
C12 0.0331(8) 0.0447(10) 0.0299(8) -0.0038(7) 0.0036(6) 0.0030(7)
C14 0.0287(11) 0.0367(12) 0.0296(11) 0.000 -0.0008(8) 0.000
C15 0.0294(11) 0.0244(10) 0.0350(12) 0.000 0.0025(9) 0.000
C21 0.0578(12) 0.0529(12) 0.0425(10) -0.0169(9) 0.0009(9) -0.0015(10)
C24 0.0670(16) 0.0684(16) 0.0650(15) -0.0140(13) 0.0078(12) 0.0117(13)
C31 0.051(2) 0.051(5) 0.087(3) 0.009(2) 0.006(2) 0.005(2)
C34 0.065(2) 0.088(5) 0.067(2) 0.000(3) -0.0133(18) 0.012(3)
F25 0.105(6) 0.223(11) 0.0394(18) 0.011(4) 0.008(2) 0.079(6)
F26 0.105(4) 0.077(3) 0.144(6) -0.027(3) -0.006(4) 0.039(3)
F27 0.066(3) 0.116(4) 0.257(10) 0.046(5) 0.059(4) 0.008(3)
F28 0.124(5) 0.141(6) 0.271(11) 0.105(7) 0.058(7) 0.059(5)
F29 0.088(5) 0.178(8) 0.143(7) -0.098(6) -0.070(5) 0.063(4)
F30 0.069(3) 0.265(11) 0.078(3) -0.057(5) 0.029(2) 0.039(5)
F35 0.108(6) 0.096(4) 0.106(6) 0.035(3) -0.018(4) 0.031(4)
F36 0.181(11) 0.188(11) 0.067(4) -0.057(5) -0.046(5) 0.039(7)
F37 0.055(2) 0.205(6) 0.135(4) 0.000 -0.007(2) 0.000
F38 0.054(6) 0.105(8) 0.120(12) -0.013(7) -0.021(6) -0.010(6)
F39 0.074(8) 0.097(7) 0.065(7) -0.003(6) -0.020(6) 0.046(6)
F40 0.067(7) 0.134(14) 0.067(6) 0.012(6) -0.010(5) 0.019(6)
N11 0.0308(7) 0.0290(7) 0.0316(7) -0.0047(5) -0.0001(5) 0.0031(5)
N13 0.0279(9) 0.0346(10) 0.0280(9) 0.000 0.0029(7) 0.000
O16 0.0333(9) 0.0489(10) 0.0305(8) 0.000 0.0031(7) 0.000
O17 0.0272(8) 0.0512(11) 0.0393(9) 0.000 0.0034(7) 0.000
O22 0.0917(13) 0.0712(11) 0.0484(9) -0.0232(8) -0.0108(8) 0.0092(10)
O23 0.0736(13) 0.1252(18) 0.0845(13) -0.0707(13) -0.0322(10) 0.0411(12)
O32 0.085(3) 0.057(2) 0.135(4) 0.020(2) -0.019(3) -0.001(2)
O33 0.074(2) 0.060(2) 0.078(2) 0.0124(18) -0.027(2) 0.008(2)
Cl1 0.0340(3) 0.0436(3) 0.0384(3) 0.000 0.0004(2) 0.000
 
_geom_special_details
;
 All esds (except the esd in the dihedral angle between two l.s. planes)
 are estimated using the full covariance matrix.  The cell esds are taken
 into account individually in the estimation of esds in distances, angles
 and torsion angles; correlations between esds in cell parameters are only
 used when they are defined by crystal symmetry.  An approximate (isotropic)
 treatment of cell esds is used for estimating esds involving l.s. planes.
;
 
loop_
 _geom_bond_atom_site_label_1
 _geom_bond_atom_site_label_2
 _geom_bond_distance
 _geom_bond_site_symmetry_2
 _geom_bond_publ_flag
C2 N11 1.329(2) . ?
C2 C3 1.401(2) . ?
C2 C12 1.497(3) . ?
C3 C4 1.364(3) . ?
C3 H3 0.9500 . ?
C4 C5 1.412(3) . ?
C4 H4 0.9500 . ?
C5 C10 1.415(2) . ?
C5 C6 1.416(3) . ?
C6 C7 1.368(3) . ?
C6 H6 0.9500 . ?
C7 C8 1.407(3) . ?
C7 H7 0.9500 . ?
C8 C9 1.371(3) . ?
C8 H8 0.9500 . ?
C9 C10 1.407(2) . ?
C9 H9 0.9500 . ?
C10 N11 1.371(2) . ?
C12 N13 1.462(2) . ?
C12 H12A 0.9900 . ?
C12 H12B 0.9900 . ?
C14 N13 1.473(3) . ?
C14 C15 1.508(3) . ?
C14 H14A 0.9900 . ?
C14 H14B 0.9900 . ?
C15 O16 1.209(3) . ?
C15 O17 1.326(3) . ?
C21 O22 1.196(3) . ?
C21 O23 1.248(3) . ?
C21 C24 1.527(4) . ?
C24 F30 1.173(5) . ?
C24 F25 1.232(5) . ?
C24 F29 1.274(6) . ?
C24 F26 1.320(5) . ?
C24 F27 1.366(6) . ?
C24 F28 1.375(7) . ?
C31 O32 1.200(7) . ?
C31 O33 1.220(6) . ?
C31 C34 1.523(7) . ?
C34 F36 1.273(9) . ?
C34 F39 1.284(10) . ?
C34 F38 1.320(10) . ?
C34 F35 1.346(11) . ?
C34 F40 1.372(12) . ?
C34 F37 1.397(7) . ?
N11 H11A 0.8800 . ?
N13 C12 1.462(2) 4_575 ?
O17 H17 0.856(19) . ?
O23 H23 0.8400 . ?
O33 H33 0.8400 . ?
 
loop_
 _geom_angle_atom_site_label_1
 _geom_angle_atom_site_label_2
 _geom_angle_atom_site_label_3
 _geom_angle
 _geom_angle_site_symmetry_1
 _geom_angle_site_symmetry_3
 _geom_angle_publ_flag
N11 C2 C3 119.06(16) . . ?
N11 C2 C12 118.60(15) . . ?
C3 C2 C12 122.27(15) . . ?
C4 C3 C2 119.90(16) . . ?
C4 C3 H3 120.0 . . ?
C2 C3 H3 120.0 . . ?
C3 C4 C5 120.74(16) . . ?
C3 C4 H4 119.6 . . ?
C5 C4 H4 119.6 . . ?
C4 C5 C10 118.17(16) . . ?
C4 C5 C6 123.51(17) . . ?
C10 C5 C6 118.33(17) . . ?
C7 C6 C5 120.02(17) . . ?
C7 C6 H6 120.0 . . ?
C5 C6 H6 120.0 . . ?
C6 C7 C8 120.64(18) . . ?
C6 C7 H7 119.7 . . ?
C8 C7 H7 119.7 . . ?
C9 C8 C7 121.31(18) . . ?
C9 C8 H8 119.3 . . ?
C7 C8 H8 119.3 . . ?
C8 C9 C10 118.44(17) . . ?
C8 C9 H9 120.8 . . ?
C10 C9 H9 120.8 . . ?
N11 C10 C9 120.64(15) . . ?
N11 C10 C5 118.09(15) . . ?
C9 C10 C5 121.26(16) . . ?
N13 C12 C2 112.92(14) . . ?
N13 C12 H12A 109.0 . . ?
C2 C12 H12A 109.0 . . ?
N13 C12 H12B 109.0 . . ?
C2 C12 H12B 109.0 . . ?
H12A C12 H12B 107.8 . . ?
N13 C14 C15 113.21(18) . . ?
N13 C14 H14A 108.9 . . ?
C15 C14 H14A 108.9 . . ?
N13 C14 H14B 108.9 . . ?
C15 C14 H14B 108.9 . . ?
H14A C14 H14B 107.7 . . ?
O16 C15 O17 124.2(2) . . ?
O16 C15 C14 125.2(2) . . ?
O17 C15 C14 110.61(19) . . ?
O22 C21 O23 128.4(2) . . ?
O22 C21 C24 118.8(2) . . ?
O23 C21 C24 112.72(19) . . ?
F30 C24 F29 110.6(5) . . ?
F25 C24 F26 109.7(6) . . ?
F25 C24 F27 107.9(6) . . ?
F26 C24 F27 99.6(5) . . ?
F30 C24 F28 104.3(7) . . ?
F29 C24 F28 103.5(7) . . ?
F30 C24 C21 117.5(4) . . ?
F25 C24 C21 116.1(4) . . ?
F29 C24 C21 113.2(4) . . ?
F26 C24 C21 111.6(3) . . ?
F27 C24 C21 110.6(4) . . ?
F28 C24 C21 106.1(4) . . ?
O32 C31 O33 128.2(6) . . ?
O32 C31 C34 118.1(6) . . ?
O33 C31 C34 113.6(6) . . ?
F39 C34 F38 113.1(9) . . ?
F36 C34 F35 109.9(7) . . ?
F39 C34 F40 108.4(9) . . ?
F38 C34 F40 105.3(10) . . ?
F36 C34 F37 107.3(7) . . ?
F35 C34 F37 104.1(6) . . ?
F36 C34 C31 113.0(7) . . ?
F39 C34 C31 111.5(7) . . ?
F38 C34 C31 111.6(9) . . ?
F35 C34 C31 116.3(6) . . ?
F40 C34 C31 106.6(8) . . ?
F37 C34 C31 105.4(5) . . ?
C2 N11 C10 124.02(15) . . ?
C2 N11 H11A 118.0 . . ?
C10 N11 H11A 118.0 . . ?
C12 N13 C12 111.56(19) 4_575 . ?
C12 N13 C14 112.28(12) 4_575 . ?
C12 N13 C14 112.27(12) . . ?
C15 O17 H17 110(3) . . ?
C21 O23 H23 109.5 . . ?
C31 O33 H33 136.0 . . ?
 
loop_
 _geom_torsion_atom_site_label_1
 _geom_torsion_atom_site_label_2
 _geom_torsion_atom_site_label_3
 _geom_torsion_atom_site_label_4
 _geom_torsion
 _geom_torsion_site_symmetry_1
 _geom_torsion_site_symmetry_2
 _geom_torsion_site_symmetry_3
 _geom_torsion_site_symmetry_4
 _geom_torsion_publ_flag
N11 C2 C3 C4 -1.1(3) . . . . ?
C12 C2 C3 C4 175.79(16) . . . . ?
C2 C3 C4 C5 0.8(3) . . . . ?
C3 C4 C5 C10 0.0(3) . . . . ?
C3 C4 C5 C6 179.75(17) . . . . ?
C4 C5 C6 C7 -179.08(17) . . . . ?
C10 C5 C6 C7 0.6(3) . . . . ?
C5 C6 C7 C8 0.1(3) . . . . ?
C6 C7 C8 C9 -0.6(3) . . . . ?
C7 C8 C9 C10 0.5(3) . . . . ?
C8 C9 C10 N11 179.82(15) . . . . ?
C8 C9 C10 C5 0.2(2) . . . . ?
C4 C5 C10 N11 -0.7(2) . . . . ?
C6 C5 C10 N11 179.62(14) . . . . ?
C4 C5 C10 C9 178.95(15) . . . . ?
C6 C5 C10 C9 -0.8(2) . . . . ?
N11 C2 C12 N13 -28.1(2) . . . . ?
C3 C2 C12 N13 155.00(16) . . . . ?
N13 C14 C15 O16 0.000(0) . . . . ?
N13 C14 C15 O17 180.000(0) . . . . ?
O22 C21 C24 F30 31.9(9) . . . . ?
O23 C21 C24 F30 -147.0(8) . . . . ?
O22 C21 C24 F25 -146.5(7) . . . . ?
O23 C21 C24 F25 34.6(8) . . . . ?
O22 C21 C24 F29 162.8(7) . . . . ?
O23 C21 C24 F29 -16.1(8) . . . . ?
O22 C21 C24 F26 -19.8(6) . . . . ?
O23 C21 C24 F26 161.3(5) . . . . ?
O22 C21 C24 F27 90.1(7) . . . . ?
O23 C21 C24 F27 -88.8(7) . . . . ?
O22 C21 C24 F28 -84.3(8) . . . . ?
O23 C21 C24 F28 96.8(8) . . . . ?
O32 C31 C34 F36 52.8(10) . . . . ?
O33 C31 C34 F36 -124.5(9) . . . . ?
O32 C31 C34 F39 -138.1(10) . . . . ?
O33 C31 C34 F39 44.6(11) . . . . ?
O32 C31 C34 F38 -10.5(11) . . . . ?
O33 C31 C34 F38 172.2(10) . . . . ?
O32 C31 C34 F35 -178.7(7) . . . . ?
O33 C31 C34 F35 4.0(8) . . . . ?
O32 C31 C34 F40 103.9(10) . . . . ?
O33 C31 C34 F40 -73.4(10) . . . . ?
O32 C31 C34 F37 -64.0(7) . . . . ?
O33 C31 C34 F37 118.6(6) . . . . ?
C3 C2 N11 C10 0.4(2) . . . . ?
C12 C2 N11 C10 -176.53(14) . . . . ?
C9 C10 N11 C2 -179.18(15) . . . . ?
C5 C10 N11 C2 0.4(2) . . . . ?
C2 C12 N13 C12 159.23(11) . . . 4_575 ?
C2 C12 N13 C14 -73.73(19) . . . . ?
C15 C14 N13 C12 -116.67(13) . . . 4_575 ?
C15 C14 N13 C12 116.67(13) . . . . ?
 
loop_
 _geom_hbond_atom_site_label_D 
 _geom_hbond_atom_site_label_H 
 _geom_hbond_atom_site_label_A 
 _geom_hbond_distance_DH 
 _geom_hbond_distance_HA 
 _geom_hbond_distance_DA 
 _geom_hbond_angle_DHA 
 _geom_hbond_site_symmetry_A 
C3 H3 O23  0.95 2.30 3.139(2) 146.3 .
C9 H9 F39  0.95 2.64 3.295(11) 126.6 .
C14 H14A O22  0.99 2.35 3.334(2) 173.8 3_665
C14 H14B O22  0.99 2.35 3.334(2) 173.8 2_655
N11 H11A O16  0.88 2.38 3.0084(17) 128.7 .
N11 H11A Cl1  0.88 2.52 3.2020(14) 134.4 1_655
O17 H17 Cl1  0.856(19) 2.13(2) 2.9763(19) 170(4) .
O23 H23 O23  0.84 1.67 2.434(4) 150.0 3_665
O33 H33 Cl1  0.84 2.27 2.991(4) 143.6 .
 
_refine_diff_density_max    0.452
_refine_diff_density_min   -0.382
_refine_diff_density_rms    0.051

_shelx_res_file
;

    MAW160517.res created by SHELXL-2014/7


REM MAW160517.res created by SHELXL-2014/7

TITL MAW160517_A.RES IN P2(1)/M
CELL  1.54184  7.06950 18.06230 12.10560 90.00000 97.10500 90.00000
ZERR 2  0.00010  0.00020  0.00010  0.00000  0.00100  0.00000
LATT 1
SYMM -X, Y+ 0.50000, -Z
SFAC C H F N O CL
UNIT 56 46 18 6 16 2
LIST 4 ! automatically inserted. Change 6 to 4 for CHECKCIF!!
PLAN 30
FMAP 2
L.S. 4
BOND $H
TEMP -90
RIGU C31 O32 C34 O33 C34
RIGU C34 F39 F40 F35 F36 F37 F38
CONF
ACTA
DFIX 0.84 O17 H17
DFIX 1.53 C31 C34
SADI C34 F40 C34 F38 C34 F39
SADI f39 F40 F40 F38 F38 F39 F35 F36 F36 F37 F37 F35
EQIV  $1   x, -y+3/2, z
FREE O32 O33_$1 O33 O33_$1 O33 C31_$1 C34 C34_$1 C31 C31_$1 C31 C34_$1
FREE C31 O32_$1 C31 O33_$1 O32 O32_$1
HTAB C3 O23
HTAB C9 F39
EQIV $2 -x+1, -y+1, -z
HTAB C14 O22_$2
EQIV $3 -x+1, y+1/2, -z
HTAB C14 O22_$3
HTAB N11 O16
EQIV $4 x+1, y, z
HTAB N11 Cl1_$4
HTAB O17 Cl1
HTAB O23 O23_$2
HTAB O33 Cl1
SIZE 0.05 0.1 0.25
REM brown plate
HTAB
REM OLD TITL MAW160517 IN P2(1)/M
REM SHELXT SOLUTION IN P2(1)/M
REM R1 0.244, RWEAK 0.020, ALPHA 0.052, ORIENTATION AS INPUT
REM FORMULA FOUND BY SHELXT: C44 N3 O4 F
REM <OLEX2.EXTRAS>
REM <HKLSRC "%.\\MAW160517.HKL">
REM </OLEX2.EXTRAS>
REM HFIX 147 O32
OMIT -3 8 13
OMIT -2 16 10
OMIT -2 12 13
SADI C31 O33 C31 O32
WGHT    0.078600    0.752000
FVAR       0.61915
C2    1    0.766021    0.616216    0.310111    11.00000    0.02514    0.03890 =
         0.03221   -0.00657   -0.00184    0.00451
C3    1    0.761583    0.544207    0.266886    11.00000    0.03599    0.04439 =
         0.03672   -0.01362   -0.00104    0.00201
AFIX  43
H3    2    0.762234    0.536617    0.189280    11.00000   -1.20000
AFIX   0
C4    1    0.756323    0.484991    0.336411    11.00000    0.03610    0.03588 =
         0.04918   -0.01515   -0.00091    0.00194
AFIX  43
H4    2    0.755002    0.436236    0.306888    11.00000   -1.20000
AFIX   0
C5    1    0.752823    0.495355    0.451727    11.00000    0.02456    0.03196 =
         0.04724   -0.00541   -0.00222    0.00129
C6    1    0.746599    0.436319    0.528154    11.00000    0.03442    0.02948 =
         0.06087    0.00035   -0.00157    0.00058
AFIX  43
H6    2    0.746443    0.386554    0.502747    11.00000   -1.20000
AFIX   0
C7    1    0.740808    0.450933    0.638590    11.00000    0.03398    0.03869 =
         0.05597    0.01066   -0.00154   -0.00225
AFIX  43
H7    2    0.736761    0.411124    0.689530    11.00000   -1.20000
AFIX   0
C8    1    0.740790    0.524348    0.677436    11.00000    0.03883    0.04559 =
         0.04037    0.00435   -0.00078   -0.00235
AFIX  43
H8    2    0.735407    0.533331    0.754307    11.00000   -1.20000
AFIX   0
C9    1    0.748386    0.583180    0.606564    11.00000    0.03756    0.03526 =
         0.03587   -0.00185   -0.00014   -0.00021
AFIX  43
H9    2    0.749303    0.632579    0.633568    11.00000   -1.20000
AFIX   0
C10   1    0.754789    0.568675    0.492913    11.00000    0.02482    0.03037 =
         0.03722   -0.00184   -0.00241    0.00216
C12   1    0.785124    0.683064    0.239174    11.00000    0.03311    0.04471 =
         0.02990   -0.00382    0.00363    0.00303
AFIX  23
H12A  2    0.921713    0.691293    0.232547    11.00000   -1.20000
H12B  2    0.718885    0.673633    0.163562    11.00000   -1.20000
AFIX   0
C14   1    0.496445    0.750000    0.268958    10.50000    0.02869    0.03674 =
         0.02965    0.00000   -0.00085    0.00000
AFIX  23
H14A  2    0.450459    0.705728    0.225457    10.50000   -1.20000
H14B  2    0.450460    0.794272    0.225457    10.50000   -1.20000
AFIX   0
C15   1    0.412273    0.750000    0.377505    10.50000    0.02945    0.02440 =
         0.03504    0.00000    0.00249    0.00000
C21   1    0.700460    0.419814   -0.027886    11.00000    0.05784    0.05287 =
         0.04246   -0.01689    0.00094   -0.00149
C24   1    0.890013    0.384467    0.018573    11.00000    0.06704    0.06843 =
         0.06499   -0.01401    0.00784    0.01165
C31   1    0.446000    0.762257    0.765793    10.50000    0.05141    0.05117 =
         0.08703    0.00945    0.00553    0.00540
C34   1    0.600676    0.737218    0.856966    10.50000    0.06466    0.08775 =
         0.06747   -0.00018   -0.01329    0.01155
PART 1
F25   3    0.917795    0.376614    0.120382    10.50000    0.10484    0.22291 =
         0.03936    0.01068    0.00771    0.07918
F26   3    0.917335    0.320800   -0.030552    10.50000    0.10490    0.07727 =
         0.14431   -0.02745   -0.00646    0.03934
F27   3    1.039167    0.423869   -0.013097    10.50000    0.06612    0.11644 =
         0.25741    0.04604    0.05912    0.00809
PART 2
F28   3    0.844841    0.319703    0.068917    10.50000    0.12364    0.14139 =
         0.27119    0.10505    0.05824    0.05926
F29   3    0.980427    0.421409    0.097835    10.50000    0.08774    0.17800 =
         0.14333   -0.09777   -0.07048    0.06287
F30   3    0.992741    0.366008   -0.045381    10.50000    0.06936    0.26477 =
         0.07778   -0.05729    0.02917    0.03865
PART 3
F35   3    0.605151    0.664442    0.881165    10.35000    0.10786    0.09559 =
         0.10595    0.03495   -0.01755    0.03149
F36   3    0.603858    0.774906    0.946053    10.35000    0.18085    0.18779 =
         0.06698   -0.05682   -0.04592    0.03851
F37   3    0.772909    0.750000    0.814677    10.35000    0.05538    0.20468 =
         0.13517    0.00000   -0.00708    0.00000
PART 4
F38   3    0.728048    0.789787    0.883087    10.15000    0.05435    0.10524 =
         0.11959   -0.01312   -0.02099   -0.01025
F39   3    0.675146    0.675551    0.832100    10.15000    0.07417    0.09687 =
         0.06480   -0.00335   -0.02019    0.04625
F40   3    0.513392    0.726805    0.950876    10.15000    0.06735    0.13446 =
         0.06692    0.01236   -0.00966    0.01922
PART 0
N11   4    0.761971    0.625611    0.418688    11.00000    0.03078    0.02902 =
         0.03156   -0.00467   -0.00009    0.00313
AFIX  43
H11A  2    0.764027    0.671185    0.444510    11.00000   -1.20000
AFIX   0
N13   4    0.706366    0.750000    0.283783    10.50000    0.02791    0.03458 =
         0.02800    0.00000    0.00289    0.00000
O16   5    0.502846    0.750000    0.468986    10.50000    0.03331    0.04893 =
         0.03052    0.00000    0.00314    0.00000
O17   5    0.223473    0.750000    0.359196    10.50000    0.02719    0.05123 =
         0.03930    0.00000    0.00338    0.00000
H17   2    0.176498    0.750000    0.421029    10.50000   -1.50000
O22   5    0.625261    0.400483   -0.117125    11.00000    0.09171    0.07123 =
         0.04837   -0.02323   -0.01084    0.00918
O23   5    0.646213    0.467788    0.035428    11.00000    0.07362    0.12523 =
         0.08446   -0.07071   -0.03225    0.04113
AFIX 147
H23   2    0.529434    0.476003    0.017775    10.50000   -1.50000
AFIX   0
O32   5    0.439983    0.826575    0.740690    10.50000    0.08517    0.05684 =
         0.13545    0.01984   -0.01856   -0.00113
O33   5    0.337674    0.712795    0.730339    10.50000    0.07378    0.06009 =
         0.07785    0.01236   -0.02733    0.00847
AFIX 147
H33   2    0.265151    0.704587    0.671262    10.50000   -1.50000
AFIX   0
CL1   6    0.012205    0.750000    0.557144    10.50000    0.03403    0.04355 =
         0.03836    0.00000    0.00036    0.00000

HKLF 4

REM  MAW160517_A.RES IN P2(1)/M
REM R1 =  0.0480 for    3028 Fo > 4sig(Fo)  and  0.0534 for all    3361 data
REM    317 parameters refined using     75 restraints

END

WGHT      0.0786      0.7520

REM Instructions for potential hydrogen bonds
HTAB C3 O23
HTAB C9 F39
HTAB C14 O22_$2
HTAB C14 O22_$3
HTAB N11 O16
HTAB N11 Cl1_$4
HTAB O17 Cl1
HTAB O23 O23_$2
HTAB O33 Cl1

REM Highest difference peak  0.452,  deepest hole -0.382,  1-sigma level  0.051
Q1    1   0.4954  0.7500  0.6975  10.50000  0.05    0.45
Q2    1   0.5355  0.6854  0.9172  11.00000  0.05    0.35
Q3    1  -0.1355  0.7500  0.5522  10.50000  0.05    0.31
Q4    1   0.7614  0.5322  0.4767  11.00000  0.05    0.30
Q5    1   0.2300  0.7500  0.6797  10.50000  0.05    0.28
Q6    1   0.0581  0.7500  0.4820  10.50000  0.05    0.27
Q7    1   0.1389  0.7500  0.5163  10.50000  0.05    0.27
Q8    1   0.7375  0.4931  0.4014  11.00000  0.05    0.26
Q9    1   0.6876  0.4886 -0.0195  11.00000  0.05    0.24
Q10   1   0.9667  0.4221 -0.0871  11.00000  0.05    0.24
Q11   1   0.7559  0.4660  0.4874  11.00000  0.05    0.24
Q12   1   0.7683  0.5806  0.2836  11.00000  0.05    0.24
Q13   1   0.5749  0.3736 -0.0652  11.00000  0.05    0.23
Q14   1   0.7552  0.5752  0.5481  11.00000  0.05    0.23
Q15   1   0.7323  0.4496  0.5830  11.00000  0.05    0.23
Q16   1   0.5785  0.7500  0.9543  10.50000  0.05    0.23
Q17   1   0.7824  0.6509  0.2790  11.00000  0.05    0.22
Q18   1   0.4579  0.7500  0.3241  10.50000  0.05    0.22
Q19   1   0.4294  0.7500  0.9586  10.50000  0.05    0.22
Q20   1   0.7779  0.6202  0.3501  11.00000  0.05    0.20
Q21   1   0.4754  0.7500  0.8659  10.50000  0.05    0.20
Q22   1   0.7298  0.7500  0.3384  10.50000  0.05    0.20
Q23   1   0.3359  0.6777  0.8055  11.00000  0.05    0.20
Q24   1   0.7399  0.7165  0.2607  11.00000  0.05    0.19
Q25   1   0.6603  0.4502  0.0623  11.00000  0.05    0.19
Q26   1   0.1703  0.7500  0.5808  10.50000  0.05    0.19
Q27   1   0.6354  0.4429  0.0382  11.00000  0.05    0.19
Q28   1   0.6084  0.7500  0.2680  10.50000  0.05    0.18
Q29   1   0.7535  0.5510  0.6353  11.00000  0.05    0.17
Q30   1   0.6778  0.8022  0.9218  11.00000  0.05    0.17
;
_shelx_res_checksum   87893

_shelx_hkl_file
;
   0   0   1    3.29    0.25
   0   0   1    3.33    0.25
   0   0   2 3036.08   54.16
   0   0   3 2120.68   38.44
   0   0   4  812.69   15.77
   0   0   5  389.70    8.67
   0   0   6   16.51    1.35
   0   0  -6   20.36    1.50
   0   0  -7  235.44    6.55
   0   0   8   90.03    3.40
   0   0   8   89.52    3.55
   0   0   8   93.42    3.27
   0   0  -8   90.86    3.80
   0   0   8   91.53    3.35
   0   0   9   62.13    3.06
   0   0  -9   63.01    3.19
   0   0   9   66.95    2.94
   0   0   9   65.35    3.04
   0   0   9   59.53    2.73
   0   0  10  106.54    4.05
   0   0  10  110.00    4.45
   0   0  10  118.61    4.38
   0   0  10  111.77    4.21
   0   0  11    3.04    1.05
   0   0  11    2.49    1.00
   0   0  11    3.39    1.00
   0   0  11    2.69    1.07
   0   0  12   40.61    2.52
   0   0  12   42.87    2.58
   0   0  12   40.96    2.64
   0   0  13   28.24    2.01
   0   0  13   26.20    1.89
   0   0  13   30.08    1.97
   0   0  14   18.45    1.44
   0   0  14   17.86    1.34
   0   0  15    3.66    0.55
   0  -1   1   26.13    0.76
   0  -1   1   26.65    0.72
   0  -1   1   28.42    0.86
   0   1  -1   25.12    0.66
   0   1   1   26.57    0.78
   0   1   1   26.97    0.82
   0   1   1   25.73    0.82
   0  -1   2 2001.68   36.50
   0  -1   2 2061.26   36.60
   0   1   2 2039.34   36.48
   0  -1   2 2028.55   36.32
   0   1   2 1985.67   36.54
   0   1  -2 2065.52   36.46
   0   1  -2 2022.49   35.87
   0   1   3  333.39    7.10
   0  -1   3  347.11    7.15
   0   1   3  346.82    7.25
   0   1  -3  346.06    7.11
   0  -1   3  336.39    7.08
   0   1  -4   82.59    2.61
   0  -1   4   82.41    2.63
   0   1   4   80.48    2.58
   0   1   4   79.87    2.68
   0   1   5   12.91    1.08
   0   1  -5   13.70    1.13
   0   1   5   12.57    1.13
   0   1  -6   25.50    1.64
   0   1   6   25.20    1.63
   0  -1  -7    0.47    0.58
   0   1  -7    0.70    0.54
   0   1   7    0.77    0.61
   0  -1   8    2.86    0.74
   0   1  -8    3.34    0.84
   0  -1   8    2.77    0.88
   0   1   8    2.49    0.84
   0  -1  -8    3.32    0.87
   0   1   8    3.10    0.75
   0   1   8    2.17    0.80
   0   1   8    3.75    0.70
   0  -1   8    2.66    0.78
   0   1   8    3.06    0.77
   0   1   9   38.09    2.31
   0   1   9   38.82    2.14
   0   1   9   37.78    1.87
   0   1   9   38.90    2.24
   0  -1  -9   37.74    2.46
   0  -1   9   37.62    2.35
   0   1   9   37.63    2.33
   0  -1   9   37.54    2.14
   0  -1   9   37.50    2.28
   0   1  10   29.70    1.72
   0   1  10   31.66    2.13
   0  -1  10   32.90    2.23
   0   1  10   29.14    2.16
   0   1  10   25.96    1.90
   0  -1  10   27.78    1.97
   0   1  10   25.52    2.13
   0  -1  10   30.72    2.28
   0   1  11   33.93    2.19
   0  -1  11   31.19    2.38
   0   1  11   29.83    2.26
   0   1  11   34.31    1.84
   0   1  11   31.94    2.39
   0  -1  11   33.40    2.35
   0   1  11   27.77    2.15
   0  -1  11   28.44    2.07
   0  -1  12   12.99    1.66
   0  -1 -12   11.94    2.11
   0   1  12   11.21    1.46
   0  -1  12   12.64    1.51
   0   1  12   13.19    1.56
   0   1  12   13.05    1.66
   0   1  13   23.86    1.78
   0  -1  13   20.17    1.68
   0   1  13   19.38    1.74
   0   1  13   18.84    1.62
   0  -1  13   23.77    1.88
   0   1  14    6.75    1.00
   0  -1  14    8.48    0.96
   0   1  14    8.13    0.98
   0  -1  14    7.59    1.04
   0  -1  15    9.94    0.80
   0  -1  15   12.81    0.81
   0   1  15   11.62    0.82
   0   2   0   19.40    0.78
   0  -2   0   17.23    0.74
   0  -2   1   73.79    1.86
   0   2   1   69.27    1.95
   0   2  -1   72.77    1.78
   0   2   1   76.50    1.79
   0  -2   1   73.04    1.65
   0   2  -1   73.01    1.97
   0   2   1   74.04    1.89
   0   2   2 1409.14   25.51
   0   2   2 1350.87   25.48
   0   2  -2 1381.81   25.03
   0   2  -2 1414.00   25.47
   0  -2   2 1437.36   25.32
   0  -2   2 1379.68   25.54
   0  -2   2 1396.90   25.17
   0  -2   3 1187.50   21.61
   0   2  -3 1168.97   21.03
   0   2   3 1162.73   21.94
   0  -2   3 1159.64   22.05
   0   2  -3 1199.18   21.90
   0   2   3 1166.61   22.01
   0   2   4   48.58    2.06
   0   2   4   49.70    1.98
   0   2  -4   52.47    1.98
   0   2   5  123.15    3.93
   0   2  -5  124.86    3.76
   0   2   5  124.15    3.79
   0   2  -6  860.18   17.25
   0   2   6  827.61   17.17
   0   2  -7   65.75    2.93
   0   2   7   63.91    2.90
   0  -2   8    3.95    0.93
   0  -2   8    5.71    0.85
   0   2   8    5.31    1.00
   0  -2   8    5.18    0.91
   0  -2  -8    4.29    0.99
   0   2   8    5.02    0.86
   0   2   8    5.77    0.93
   0   2  -8    4.76    0.91
   0   2   8    5.25    0.81
   0  -2   8    5.88    0.97
   0   2   8    5.31    0.99
   0   2   9    8.12    0.96
   0   2   9    9.40    1.32
   0  -2  -9    6.14    1.13
   0   2   9    5.87    1.00
   0   2   9    6.65    1.11
   0  -2   9    6.23    1.20
   0  -2   9    6.53    0.93
   0  -2   9    7.22    1.13
   0   2   9    4.42    1.09
   0   2  10   77.11    3.33
   0   2  10   75.76    3.54
   0   2  10   78.09    3.45
   0  -2  10   77.95    3.52
   0  -2  10   77.23    3.67
   0   2  10   84.35    3.06
   0   2  10   77.88    3.67
   0   2  11   58.98    3.10
   0   2  11   60.02    3.15
   0   2  11   58.14    2.91
   0  -2  11   62.04    3.14
   0   2  11   59.94    3.26
   0  -2  11   63.55    3.36
   0   2  11   58.94    2.56
   0   2  12   19.79    1.77
   0   2  12   20.26    1.82
   0   2  12   20.64    1.91
   0   2  12   24.92    1.53
   0  -2  12   24.25    1.92
   0  -2  12   22.17    2.02
   0   2  13    5.70    1.18
   0   2  13    9.54    1.24
   0  -2  13   10.64    1.26
   0  -2  13    9.64    1.30
   0  -2  14   22.32    1.42
   0   2  14   20.95    1.46
   0   2  14   21.64    1.53
   0  -2  14   21.34    1.52
   0   2  15   11.15    0.79
   0  -2  15   10.18    0.69
   0  -2  15   12.03    0.83
   0   3   0    0.27    0.31
   0   3   0    0.12    0.30
   0  -3   0    0.03    0.27
   0   3  -1  510.62   10.08
   0  -3   1  525.25   10.25
   0   3  -1  522.56   10.35
   0   3   1  530.83   10.35
   0   3   1  536.46    9.91
   0  -3   1  528.51    9.82
   0  -3   2  300.34    6.35
   0  -3   2  299.31    6.51
   0   3   2  312.01    6.78
   0   3   2  313.55    6.49
   0   3   2  304.33    6.59
   0   3   2  322.41    6.45
   0  -3   2  309.81    6.08
   0   3  -2  313.69    6.22
   0   3  -2  308.32    6.50
   0  -3   3  222.38    4.80
   0   3  -3  228.88    5.18
   0  -3   3  217.38    4.96
   0   3   3  218.90    5.19
   0  -3   3  219.25    5.28
   0   3   3  229.95    5.27
   0   3  -3  226.46    4.60
   0  -3   4  241.06    5.98
   0   3   4  241.39    5.91
   0   3   4  243.82    5.83
   0   3  -4  239.43    4.65
   0   3  -4  242.75    5.76
   0   3   5  578.36   12.31
   0   3   5  565.35   12.03
   0   3  -5  559.65   12.00
   0   3  -6  346.85    8.17
   0   3   6  323.33    8.09
   0   3  -7  194.78    5.63
   0   3   7  177.01    5.52
   0  -3   8    3.40    0.83
   0   3  -8    3.10    0.85
   0  -3   8    3.39    0.81
   0   3   8    3.69    0.77
   0  -3   8    3.55    0.79
   0   3   8    4.40    0.80
   0   3   8    3.33    0.90
   0   3   8    3.85    0.84
   0  -3   8    4.87    1.04
   0  -3   9    6.65    1.12
   0   3   9    7.04    1.23
   0   3   9    5.74    1.16
   0  -3   9    5.73    1.14
   0  -3   9    7.29    1.23
   0   3   9    6.87    1.00
   0   3   9    8.52    1.06
   0  -3   9    7.47    1.03
   0  -3  -9    7.23    1.24
   0   3   9    6.80    1.09
   0  -3   9    5.46    0.99
   0   3  10   69.71    2.88
   0  -3  10   69.72    3.13
   0   3  10   77.29    3.36
   0   3  10   66.12    3.39
   0  -3  10   66.42    3.23
   0   3  10   69.73    3.39
   0   3  10   70.08    3.10
   0  -3  10   72.80    3.30
   0  -3  10   64.74    2.94
   0  -3  10   66.64    3.41
   0   3  11   22.44    2.09
   0  -3 -11   26.48    2.96
   0  -3  11   23.62    1.97
   0  -3  11   24.26    1.98
   0   3  11   26.65    2.08
   0   3  11   26.37    1.73
   0  -3  11   25.72    2.21
   0   3  11   23.57    2.08
   0  -3  11   25.21    1.97
   0   3  12   20.40    1.96
   0   3  12   20.58    1.79
   0   3  12   21.76    1.50
   0  -3  12   17.92    1.69
   0  -3  12   17.94    1.84
   0   3  12   21.13    1.86
   0  -3  12   22.63    1.86
   0  -3  13    8.72    1.11
   0   3  13    8.22    1.18
   0  -3  13    8.74    1.24
   0   3  13    7.99    0.88
   0   3  13    6.19    1.17
   0  -3  13    9.29    1.16
   0  -3  14    0.90    0.59
   0  -3  14    0.54    0.60
   0   3  14    0.65    0.63
   0   3  15    0.36    0.40
   0  -3  15    0.42    0.37
   0   4   0 1603.66   29.38
   0   4   0 1582.19   28.43
   0  -4   0 1585.58   29.20
   0   4   0 1615.33   29.29
   0   4   0 1601.69   29.23
   0   4   1 3536.59   64.11
   0  -4   1 3300.50   64.11
   0  -4   1 3700.60   63.59
   0   4  -1 3428.81   63.98
   0   4  -1 3781.07   64.38
   0   4   1 3636.08   63.57
   0   4   1 3519.83   64.26
   0  -4   2  691.45   13.38
   0   4   2  693.04   13.71
   0   4  -2  693.30   13.70
   0   4   2  706.32   13.17
   0  -4   2  670.60   12.77
   0   4  -2  685.86   13.13
   0   4   2  671.36   13.49
   0   4   2  679.60   13.41
   0  -4   2  664.97   13.17
   0   4  -2  693.61   13.39
   0  -4  -3   86.20    3.07
   0   4   3   90.53    2.81
   0   4   3   89.68    2.88
   0   4  -3   94.65    2.47
   0   4  -3   93.05    3.14
   0  -4   3   89.37    2.66
   0  -4   3   90.19    2.39
   0   4  -3   96.35    2.87
   0  -4   3   89.35    2.88
   0   4   4  752.07   15.12
   0  -4   4  750.00   14.41
   0   4   4  766.85   15.17
   0  -4   4  736.41   15.23
   0  -4   4  744.43   14.68
   0   4  -4  767.84   15.07
   0   4  -4  740.02   13.96
   0   4   5    0.68    0.60
   0   4  -5    1.54    0.58
   0   4   5    0.50    0.54
   0   4   6   61.15    2.76
   0   4  -6   64.77    2.77
   0   4   7   50.89    2.08
   0   4   7   46.69    2.54
   0   4  -7   52.80    2.64
   0  -4   7   49.09    2.43
   0  -4   8  135.39    4.40
   0  -4   8  127.83    4.18
   0   4   8  138.64    4.06
   0   4   8  137.34    4.35
   0  -4   8  125.95    4.07
   0   4   8  135.56    4.02
   0   4  -8  132.33    4.70
   0  -4   8  132.18    4.58
   0   4   8  131.08    4.04
   0   4   9    2.40    0.87
   0   4   9    2.52    0.89
   0   4   9    3.12    0.79
   0  -4   9    1.99    0.83
   0  -4   9    1.71    0.90
   0  -4  -9    1.51    0.78
   0   4   9    2.63    0.79
   0  -4   9    1.72    0.96
   0   4   9    2.21    0.92
   0  -4   9    1.86    0.76
   0  -4  10  408.36    9.78
   0   4  10  382.96   10.32
   0   4  10  415.25   10.11
   0   4  10  423.03   10.37
   0   4 -10  371.19   12.31
   0   4  10  403.61    9.56
   0  -4  10  400.89    9.75
   0  -4 -10  406.18   12.84
   0  -4  10  419.11   10.04
   0  -4  10  411.18   10.16
   0   4  10  407.73    9.74
   0  -4  10  420.87   10.59
   0  -4  11  228.22    6.99
   0   4  11  223.71    6.07
   0  -4  11  215.55    6.58
   0  -4 -11  217.29    8.79
   0   4  11  211.02    6.46
   0   4  11  224.56    6.73
   0  -4  11  223.30    6.50
   0   4  11  198.53    6.64
   0   4  12   19.65    1.75
   0  -4  12   20.87    1.91
   0  -4  12   14.55    1.53
   0  -4  12   20.04    1.69
   0   4  12   17.03    1.40
   0  -4  13    3.98    1.04
   0   4  13    2.69    0.69
   0   4  13    1.60    0.80
   0  -4  13    2.32    0.83
   0  -4  13    2.16    0.78
   0  -4  14    4.54    0.80
   0  -4  14    5.24    0.75
   0   4  14    5.49    0.87
   0   4  15    1.89    0.43
   0  -4  15    2.69    0.43
   0   5   0    0.44    0.20
   0   5   0   -0.10    0.46
   0  -5   0    0.71    0.59
   0   5   0    0.09    0.45
   0   5   0    0.43    0.58
   0   5  -1    0.50    0.49
   0  -5   1    0.75    0.65
   0   5  -1   -0.05    0.57
   0  -5   1    0.19    0.32
   0   5   1    0.15    0.23
   0   5   1   -0.05    0.45
   0  -5  -1    0.63    0.53
   0   5   1    0.29    0.46
   0   5   1    0.20    0.38
   0   5   2   29.32    1.64
   0   5  -2   32.11    1.46
   0   5   2   31.27    1.33
   0   5  -2   30.31    1.52
   0   5   2   31.12    1.58
   0  -5   2   30.95    1.53
   0  -5  -2   30.73    1.70
   0   5   2   31.77    1.64
   0  -5   2   29.47    1.17
   0   5  -2   33.22    1.72
   0   5   2   34.62    1.67
   0   5  -3  370.11    8.03
   0   5  -3  360.68    8.43
   0  -5  -3  350.75    8.45
   0  -5   3  352.11    7.23
   0   5   3  357.03    8.15
   0  -5   3  360.74    7.79
   0  -5   3  345.25    8.03
   0   5   3  347.65    8.43
   0   5  -3  368.05    7.58
   0   5   3  357.29    7.85
   0   5   4   16.87    1.31
   0   5  -4   20.99    1.62
   0  -5   4   18.99    1.22
   0   5  -4   20.10    1.38
   0  -5  -4   20.59    1.64
   0  -5   4   18.67    1.01
   0   5  -4   18.56    0.98
   0   5   4   17.64    1.31
   0  -5   4   17.51    1.35
   0   5  -5  418.20    9.28
   0   5   5  385.92    9.31
   0   5   5  407.06    9.44
   0   5  -5  388.50    9.93
   0  -5  -5  399.41   10.08
   0  -5   5  387.74    9.43
   0   5   6  110.33    4.03
   0  -5  -6  110.85    4.68
   0   5  -6  109.84    3.92
   0   5  -7  191.23    6.82
   0   5  -7  190.55    5.81
   0   5   7  183.83    5.13
   0  -5  -7  197.06    7.00
   0   5   7  184.28    5.80
   0   5   7  184.72    4.89
   0  -5   7  185.00    5.05
   0   5   8   32.80    1.98
   0  -5   8   36.58    1.92
   0  -5   8   35.51    1.94
   0   5   8   35.00    1.85
   0  -5  -8   34.62    2.96
   0  -5   8   30.94    2.16
   0   5   8   34.35    1.90
   0  -5   8   31.91    1.94
   0   5   8   36.25    1.93
   0   5  -8   32.16    2.18
   0   5  -8   36.18    3.01
   0  -5   9  287.14    7.83
   0  -5   9  290.14    7.63
   0   5   9  284.77    7.34
   0   5   9  294.50    7.33
   0  -5  -9  287.39   10.06
   0  -5   9  312.98    8.34
   0   5   9  296.22    7.35
   0  -5   9  288.20    7.41
   0   5   9  295.93    7.73
   0   5  -9  307.63   10.19
   0  -5  10  400.33    9.54
   0   5  10  407.32    9.31
   0  -5 -10  380.78   12.46
   0   5  10  404.05    9.87
   0   5 -10  389.79   12.55
   0   5  10  379.19    9.36
   0  -5  10  407.37   10.43
   0  -5  10  403.65    9.84
   0  -5  10  386.57    9.60
   0  -5  10  397.19   10.02
   0  -5  11  118.35    4.18
   0   5  11  128.51    4.25
   0  -5 -11  137.99    6.66
   0  -5  11  133.24    5.03
   0  -5  11  126.68    4.53
   0   5  11  122.29    4.71
   0  -5  11  136.76    4.77
   0   5 -11  113.46    6.06
   0  -5  12   17.14    1.71
   0   5  12   16.42    1.41
   0  -5  12   16.41    1.56
   0   5  12   18.45    1.72
   0  -5  12   18.02    1.59
   0  -5  13    1.65    0.68
   0  -5  13    1.45    0.80
   0   5  13    0.77    0.74
   0  -5  13    1.88    0.76
   0   5  13    2.04    0.69
   0  -5  14   23.97    1.48
   0   5  14   25.13    1.46
   0  -6   0 4294.12   75.37
   0   6   0 4208.07   73.97
   0   6   0 4175.72   75.30
   0   6   0 4210.93   75.57
   0  -6   0 4183.41   75.50
   0   6   1  719.85   14.33
   0   6   1  704.11   13.11
   0  -6  -1  707.57   14.30
   0   6  -1  716.73   14.36
   0  -6   1  638.58   14.08
   0  -6   1  687.61   13.34
   0   6  -1  695.43   14.05
   0   6   1  719.26   14.21
   0  -6   1  631.01   14.03
   0   6   1  696.46   14.10
   0  -6  -1  724.60   14.19
   0   6   2  895.37   18.15
   0   6   2  928.65   17.37
   0   6   2  892.60   18.38
   0   6   2  912.39   18.11
   0   6  -2  920.80   17.99
   0   6  -2  928.68   18.45
   0  -6   2  883.57   17.92
   0  -6   2  921.66   17.13
   0   6  -2  911.69   17.78
   0  -6  -2  908.96   18.33
   0   6  -3  108.28    3.50
   0   6   3  107.64    3.68
   0  -6   3  102.14    2.79
   0   6  -3  110.24    3.24
   0  -6   3  105.63    3.52
   0  -6  -3  114.32    3.91
   0   6   3  106.31    3.83
   0   6  -3  103.86    3.77
   0  -6   3  106.56    3.36
   0   6   3  115.59    3.34
   0  -6   4   10.13    0.99
   0  -6   4    8.38    1.06
   0  -6  -4   11.00    1.32
   0   6   4   10.65    1.09
   0   6  -4   12.00    1.18
   0   6  -4    9.19    1.23
   0   6  -4   11.36    0.87
   0   6   4   11.53    1.18
   0  -6   4    9.91    0.76
   0  -6  -5   36.01    2.43
   0   6   5   29.31    1.95
   0   6  -5   36.41    2.44
   0  -6   5   33.45    2.08
   0   6  -5   33.88    1.99
   0   6   5   33.73    2.02
   0  -6  -6    1.52    0.94
   0   6   6    1.86    0.74
   0   6  -6    2.48    0.77
   0   6  -6    1.89    0.91
   0  -6  -7   18.74    2.12
   0   6   7   17.40    1.36
   0   6   7   16.68    1.50
   0   6   7   18.16    1.65
   0  -6   7   18.26    1.35
   0   6   7   19.62    1.36
   0  -6   7   17.62    1.35
   0  -6   7   16.65    1.21
   0   6  -7   17.13    1.59
   0   6  -7   18.81    2.06
   0  -6   8   74.85    3.02
   0  -6   8   71.75    2.96
   0   6   8   72.12    3.01
   0   6   8   69.45    2.87
   0   6  -8   77.36    3.51
   0   6   8   68.82    3.17
   0   6  -8   72.27    4.35
   0   6   8   74.34    2.78
   0  -6   8   71.91    2.83
   0  -6  -8   70.28    4.34
   0  -6   8   76.55    3.42
   0   6   8   74.38    2.98
   0  -6   9   47.39    2.38
   0   6  -9   45.00    3.62
   0   6   9   47.61    2.57
   0  -6   9   51.99    2.60
   0  -6  -9   47.77    3.73
   0   6   9   48.40    2.46
   0  -6   9   47.88    2.43
   0   6   9   45.61    2.29
   0   6   9   46.92    2.42
   0  -6   9   52.36    2.96
   0  -6   9   50.62    2.67
   0  -6  10    7.65    1.42
   0  -6  10    7.04    1.15
   0  -6 -10    7.51    1.77
   0  -6  10    7.59    1.32
   0   6  10    8.06    1.22
   0   6 -10    4.47    1.49
   0   6  10    8.10    1.15
   0  -6  10    7.23    1.12
   0  -6  10    8.35    1.21
   0   6  11   19.42    1.50
   0  -6  11   17.40    1.61
   0   6  11   20.06    1.58
   0  -6 -11   15.79    2.34
   0  -6  11   18.21    1.68
   0  -6  11   17.56    1.88
   0   6 -11   16.82    2.37
   0  -6  11   17.68    1.49
   0  -6  12   78.38    3.21
   0  -6  12   83.90    3.71
   0  -6  12   85.64    3.35
   0   6  12   79.78    3.07
   0  -6  13    3.30    0.94
   0   6  13    5.24    0.80
   0  -6  13    5.77    0.88
   0  -6  13    4.10    0.79
   0  -6  14    4.37    0.73
   0  -6  14    4.59    0.62
   0   7   0    0.39    0.56
   0  -7   0    0.58    0.58
   0   7   0    0.30    0.58
   0   7   0    0.08    0.17
   0  -7   0    1.20    0.62
   0   7   1  345.70    8.07
   0   7   1  344.81    8.22
   0   7   1  339.62    8.02
   0  -7   1  320.63    8.10
   0   7  -1  339.30    7.91
   0   7  -1  339.77    8.23
   0  -7  -1  351.94    8.10
   0  -7  -1  335.40    8.19
   0  -7   1  345.07    7.24
   0   7   1  338.71    6.86
   0  -7   2   58.14    2.68
   0   7  -2   61.77    2.62
   0   7   2   62.29    2.10
   0   7  -2   61.48    2.49
   0  -7  -2   56.69    2.70
   0  -7   2   59.56    2.06
   0   7   2   60.53    2.78
   0   7   2   63.01    2.67
   0   7  -2   63.38    2.86
   0   7   2   62.78    2.72
   0  -7   2   61.00    2.56
   0   7  -3  132.42    4.64
   0  -7   3  136.21    4.30
   0   7   3  134.36    4.47
   0   7  -3  139.86    4.32
   0  -7   3  134.79    4.17
   0   7   3  132.72    3.88
   0   7   3  139.35    4.74
   0   7  -3  137.28    4.01
   0  -7   3  132.99    3.39
   0  -7  -3  139.41    4.69
   0  -7  -4 1291.05   26.11
   0   7  -4 1307.66   24.52
   0  -7   4 1248.68   24.91
   0   7  -4 1296.37   25.36
   0   7   4 1302.26   24.98
   0  -7   4 1273.10   25.40
   0   7  -4 1314.96   26.17
   0   7   4 1262.99   25.57
   0  -7   5  141.12    4.41
   0   7  -5  156.15    5.58
   0  -7   5  149.15    5.02
   0   7   5  139.22    4.90
   0  -7  -5  144.53    5.44
   0   7   5  148.57    4.77
   0   7  -5  154.68    4.90
   0  -7   6   44.14    2.15
   0   7   6   44.94    2.20
   0   7  -6   38.22    2.84
   0   7   6   37.17    2.40
   0  -7  -6   45.72    3.07
   0   7  -6   42.07    2.44
   0  -7   7   35.64    1.84
   0   7   7   34.40    2.09
   0  -7   7   34.64    1.86
   0  -7  -7   30.95    2.74
   0  -7   7   33.98    1.96
   0  -7   7   29.99    1.62
   0   7   7   32.92    1.81
   0   7  -7   33.20    2.26
   0   7  -7   34.97    2.89
   0   7  -8   -0.34    0.65
   0  -7  -8   -0.59    1.03
   0   7  -8   -0.20    0.95
   0   7   8   -0.30    0.76
   0   7   8    0.09    0.82
   0  -7   8    0.13    0.64
   0   7   8   -0.38    0.78
   0  -7   8    0.85    0.70
   0  -7   8    0.33    0.65
   0  -7  -9   44.80    3.63
   0  -7   9   40.27    2.70
   0  -7   9   43.53    2.21
   0   7  -9   46.38    3.74
   0   7   9   44.05    2.38
   0   7   9   45.64    2.68
   0  -7   9   43.83    2.55
   0  -7   9   44.16    2.39
   0   7   9   42.29    2.32
   0  -7   9   45.85    2.44
   0  -7  10    0.27    0.70
   0   7 -10    0.68    1.05
   0  -7  10    0.29    0.87
   0  -7  10    0.33    0.68
   0  -7 -10    0.67    1.04
   0   7  10    1.59    0.87
   0  -7  10    1.81    1.09
   0   7  10    0.57    0.77
   0   7 -11   41.28    3.55
   0  -7  11   47.03    2.45
   0  -7  11   39.54    2.25
   0   7  11   50.08    2.43
   0  -7 -11   36.05    3.30
   0   7  11   42.77    2.24
   0  -7  11   42.81    2.76
   0  -7  11   44.86    2.53
   0  -7  12    5.08    1.01
   0  -7  12    4.08    0.85
   0   7  12    5.74    0.98
   0  -7  12    3.57    1.04
   0   7  12    3.49    0.74
   0  -7  13   11.49    1.03
   0  -7  13   10.00    0.99
   0   7  13   11.17    0.99
   0  -7  13    8.90    1.15
   0  -7  14   16.04    1.08
   0   7  14   12.84    0.77
   0   8   0  532.28   12.02
   0  -8   0  546.21   11.37
   0  -8   0  578.18   12.23
   0  -8   0  544.80   12.27
   0   8   0  550.45   12.38
   0  -8  -1  975.33   19.89
   0  -8   1  914.16   19.60
   0   8  -1  954.11   19.90
   0   8   1  968.02   19.71
   0   8   1  972.78   17.97
   0   8  -1  973.55   19.53
   0  -8  -1  984.29   19.67
   0   8   1  976.01   19.91
   0  -8   1  996.26   19.82
   0   8  -1  963.40   19.58
   0   8   1  960.06   19.57
   0  -8   1  953.05   18.57
   0   8   2    7.96    0.75
   0  -8  -2    8.38    1.18
   0   8  -2    6.77    1.16
   0   8   2    6.99    1.04
   0  -8  -2    8.00    1.18
   0   8  -2    7.20    1.00
   0   8   2    6.81    1.12
   0   8  -2    7.75    1.09
   0  -8   2    9.18    1.03
   0  -8   2   10.44    1.22
   0  -8   2    8.52    1.16
   0   8   3   48.02    2.77
   0   8  -3   52.68    2.86
   0   8   3   53.19    2.16
   0   8  -3   48.92    2.31
   0  -8   3   49.17    2.42
   0  -8   3   45.87    2.43
   0   8   3   47.37    2.62
   0   8  -3   51.08    2.54
   0  -8  -3   50.15    2.76
   0  -8   3   50.84    2.79
   0   8  -4  369.15    9.03
   0  -8   4  346.41    8.98
   0  -8   4  348.08    8.65
   0   8   4  366.04    9.30
   0   8  -4  362.95    9.74
   0  -8  -4  358.11    9.66
   0   8   4  356.71    8.47
   0  -8   5    7.34    1.11
   0   8   5    7.71    1.20
   0   8  -5    5.24    1.00
   0  -8  -5    4.25    1.12
   0   8  -5    6.25    1.26
   0   8   6    0.99    0.78
   0  -8   6    1.49    0.68
   0   8  -6    1.27    0.87
   0   8   6    2.87    0.85
   0  -8   6    1.26    0.57
   0   8   6    1.61    0.70
   0   8  -6    1.75    0.78
   0   8  -7  446.53   12.71
   0   8  -7  450.99   11.21
   0   8   7  457.41   10.53
   0   8   7  433.54   10.04
   0  -8   7  435.66    9.86
   0  -8   7  434.67    9.89
   0  -8   7  436.15   10.33
   0  -8  -7  448.45   12.68
   0   8   8  266.49    6.92
   0  -8   8  256.98    7.03
   0  -8   8  246.50    6.34
   0  -8   8  263.19    6.79
   0  -8   8  259.65    6.63
   0   8   8  265.95    7.31
   0  -8  -8  269.25    9.39
   0   8   8  246.58    6.69
   0   8  -8  260.51    9.31
   0  -8   9  236.37    6.79
   0  -8   9  231.51    6.64
   0  -8  -9  233.42    8.97
   0   8   9  236.46    6.48
   0  -8   9  240.26    6.57
   0  -8   9  252.57    7.43
   0   8   9  236.53    7.02
   0   8   9  240.08    6.58
   0   8  -9  228.27    9.00
   0  -8 -10    6.16    1.60
   0   8  10    6.24    1.28
   0  -8  10    7.38    1.12
   0  -8  10    6.44    1.19
   0  -8  10    8.07    1.48
   0  -8  10    7.41    1.07
   0   8  10    7.49    1.19
   0   8 -10    5.44    1.59
   0   8  10    8.82    1.21
   0   8  11   23.57    1.68
   0  -8  11   22.98    1.86
   0  -8  11   24.43    1.74
   0   8  11   22.86    1.94
   0   8  11   26.35    1.77
   0  -8  11   24.52    1.74
   0  -8  11   26.17    2.15
   0  -8  12   22.96    1.82
   0  -8  12   22.36    1.50
   0   8  12   22.91    1.54
   0  -8  12   22.14    1.56
   0   8  12   19.62    1.33
   0   8  12   22.72    1.74
   0  -8  13   -0.04    0.44
   0   8  13    0.30    0.67
   0  -8  13   -0.05    0.52
   0  -8  13    0.54    0.61
   0   8  13    0.38    0.55
   0  -8  14    2.68    0.54
   0   8  14    0.78    0.34
   0  -9   0   -0.10    0.66
   0   9   0    0.21    0.63
   0  -9   0   -0.75    1.12
   0   9   0    0.18    0.57
   0  -9   0   -0.06    0.44
   0   9   1    0.86    0.70
   0  -9   1    2.35    1.31
   0   9  -1    0.18    0.58
   0  -9  -1    0.31    0.76
   0   9   1    0.63    0.68
   0  -9  -1    1.05    0.75
   0   9  -1    0.36    0.65
   0   9   1    0.46    0.60
   0   9  -1    0.53    0.70
   0  -9   1    0.89    0.48
   0  -9   1    0.70    0.69
   0  -9   2  435.93   10.81
   0  -9  -2  445.74   11.00
   0  -9  -2  450.02   10.85
   0   9  -2  434.95   10.96
   0   9   2  428.54   10.63
   0   9  -2  462.72   10.77
   0   9  -2  437.12   10.34
   0   9   2  444.87   11.07
   0  -9   2  434.23   10.48
   0   9   3   19.90    1.93
   0  -9  -3   22.91    2.00
   0   9   3   22.00    1.36
   0   9  -3   25.68    1.91
   0  -9   3   20.47    1.74
   0  -9  -3   22.14    1.94
   0   9   3   21.78    1.88
   0  -9   3   23.07    1.78
   0  -9   3   24.34    2.01
   0   9  -3   20.95    1.61
   0   9  -3   22.67    2.04
   0   9   4    9.40    1.34
   0   9  -4   11.08    1.58
   0   9  -4   10.29    1.32
   0  -9   4    9.51    1.18
   0  -9  -4    8.23    1.41
   0   9   4    8.08    0.96
   0  -9   4    9.28    1.25
   0  -9   5   69.79    2.71
   0  -9  -5   70.49    3.88
   0   9   5   68.64    2.86
   0   9   5   63.98    3.40
   0  -9   5   72.30    3.50
   0   9  -5   72.64    3.46
   0   9   5   72.04    2.56
   0   9  -5   63.74    3.80
   0   9  -6    3.68    1.21
   0  -9   6    2.99    0.92
   0  -9   6    2.11    0.74
   0   9  -6    4.10    1.01
   0  -9  -6    2.04    1.03
   0  -9   6    2.59    0.63
   0  -9   6    4.09    0.81
   0   9   6    2.95    0.88
   0   9   6    2.64    0.90
   0   9   6    4.08    0.83
   0   9  -7  379.49   11.72
   0  -9   7  372.57    8.78
   0   9   7  380.17    9.45
   0   9   7  380.99    8.89
   0  -9  -7  399.02   11.78
   0   9  -7  374.51   10.16
   0  -9   7  372.10    8.92
   0   9   7  391.08    9.23
   0  -9   7  389.65    9.42
   0  -9  -8   67.42    4.38
   0   9   8   71.86    3.34
   0   9   8   66.32    2.99
   0  -9   8   67.68    3.18
   0   9  -8   64.12    4.41
   0  -9   8   66.39    2.81
   0  -9  -9   81.82    5.01
   0   9   9   89.38    3.89
   0   9  -9   88.81    5.34
   0  -9   9   89.64    3.67
   0  -9   9   87.69    3.66
   0  -9   9   92.03    3.47
   0  -9   9   97.81    4.24
   0   9   9   96.50    3.66
   0   9   9   82.63    3.38
   0  -9  10  332.10    8.54
   0   9  10  351.02    8.49
   0  -9 -10  316.74   10.98
   0   9  10  341.82    9.04
   0   9  10  339.06    8.42
   0   9 -10  319.23   11.23
   0  -9  10  347.80    8.40
   0  -9  10  361.99    9.46
   0  -9  10  351.82    8.78
   0  -9  11    9.13    1.11
   0  -9  11   11.45    1.51
   0   9  11   10.27    1.36
   0  -9  11   10.53    1.17
   0  -9  11   11.09    1.32
   0   9  11   12.87    1.31
   0   9  11   10.19    1.17
   0  -9  12    0.42    0.62
   0   9  12    0.23    0.79
   0  -9  12    0.78    0.79
   0  -9  12    0.82    0.55
   0   9  12    1.05    0.69
   0   9  12    0.76    0.54
   0  -9  13    1.38    0.60
   0   9  13    1.19    0.54
   0  -9  14   13.60    0.78
   0 -10   0  353.66    9.49
   0 -10   0  366.58    8.53
   0  10   0  370.47    9.42
   0  10   0  362.09    9.75
   0 -10   0  371.19    9.65
   0 -10   1  659.25   15.21
   0  10   1  670.50   15.53
   0 -10   1  679.27   15.32
   0 -10   1  638.55   13.78
   0  10  -1  690.95   15.07
   0 -10  -1  688.89   15.47
   0  10   1  694.80   15.17
   0  10  -1  661.80   15.56
   0 -10  -1  700.50   15.31
   0  10  -1  667.21   15.01
   0  10  -2    0.99    0.71
   0  10  -2    1.60    0.86
   0  10   2    0.34    0.73
   0 -10  -2    0.47    0.76
   0 -10  -2    0.12    0.67
   0 -10   2   -0.12    0.66
   0  10  -2    0.64    0.74
   0 -10   3   29.12    2.13
   0  10  -3   27.11    2.32
   0  10   3   25.04    2.20
   0 -10   3   27.46    2.24
   0  10  -3   27.07    2.12
   0 -10   3   26.25    2.03
   0 -10  -3   25.36    2.21
   0 -10  -3   28.03    2.29
   0  10   3   26.68    2.32
   0  10  -4   23.22    1.98
   0 -10   4   21.93    1.49
   0 -10   4   22.33    1.84
   0  10   4   24.99    1.66
   0 -10  -4   27.37    2.37
   0  10  -4   21.37    2.24
   0  10   4   22.57    2.05
   0 -10  -4   28.16    2.44
   0 -10   4   22.32    1.93
   0 -10   5    0.51    0.59
   0 -10  -5    0.65    0.89
   0  10   5   -0.08    0.83
   0  10   5    0.29    0.62
   0  10   5    0.14    0.67
   0  10  -5   -0.25    0.75
   0  10   5    0.68    0.70
   0 -10  -5    0.16    0.78
   0  10  -5   -0.17    0.86
   0 -10   5    0.14    0.56
   0  10  -6   20.50    2.36
   0  10  -6   16.64    1.78
   0  10   6   16.57    1.31
   0  10   6   16.20    1.84
   0 -10   6   16.08    1.51
   0 -10   6   14.75    1.70
   0  10   6   18.63    1.65
   0  10   6   16.11    1.30
   0 -10  -6   16.65    2.11
   0  10   7   20.77    1.47
   0 -10   7   19.03    1.39
   0  10   7   20.72    1.59
   0  10  -7   20.50    2.52
   0 -10  -7   21.59    2.46
   0 -10   7   19.15    1.69
   0  10   7   17.73    1.74
   0  10  -7   18.64    1.93
   0  10   7   19.76    1.63
   0 -10   8    1.41    0.67
   0  10   8    1.53    0.94
   0  10   8    0.72    0.96
   0  10   8    1.74    0.88
   0 -10  -8    1.48    1.08
   0  10  -8    0.22    1.04
   0 -10   8    0.88    0.70
   0 -10  -9   98.80    5.46
   0  10   9   98.86    3.83
   0 -10   9   98.36    3.53
   0 -10   9  101.65    3.89
   0  10   9   91.39    3.95
   0 -10   9  104.75    4.42
   0  10  -9   91.71    5.51
   0 -10   9   99.59    3.90
   0 -10  10   84.95    3.42
   0  10  10   83.24    3.71
   0 -10  10   83.79    3.44
   0  10  10   92.19    3.48
   0  10 -10   88.68    5.23
   0 -10  10   87.48    3.21
   0 -10 -10   85.30    5.00
   0 -10  10   88.89    4.00
   0 -10  11   59.67    3.01
   0  10  11   59.90    2.57
   0  10  11   58.39    2.87
   0 -10  11   58.83    2.58
   0 -10  11   58.78    2.39
   0 -10  11   58.75    2.59
   0  10  11   61.23    2.57
   0 -10  12   17.19    1.50
   0 -10  12   14.36    0.98
   0  10  12   15.15    1.39
   0  10  12   16.04    1.21
   0  10  12   17.08    1.16
   0  10  13   12.89    0.90
   0 -10  13   12.37    1.03
   0 -11   0   -0.39    1.53
   0  11   0    0.14    0.77
   0  11   0   -0.24    0.66
   0 -11   0   -0.16    0.53
   0 -11   0   -0.26    0.79
   0  11   1   17.34    1.91
   0 -11   1   17.34    1.79
   0  11   1   17.48    1.74
   0 -11  -1   13.54    1.89
   0  11  -1   13.59    1.70
   0 -11   1   21.70    2.52
   0  11  -1   16.00    1.69
   0 -11  -1   13.92    1.70
   0 -11  -1   14.61    1.39
   0  11   2   89.56    4.08
   0 -11  -2   82.92    4.03
   0  11  -2   80.46    3.85
   0  11  -2   86.29    4.03
   0 -11   2   86.74    4.13
   0 -11  -2   85.23    4.12
   0  11  -2   85.90    4.25
   0  11   2   79.77    2.94
   0  11   2   82.64    4.12
   0  11   2   79.01    4.12
   0 -11   2   88.09    3.94
   0 -11  -3   21.03    2.12
   0 -11   3   20.01    1.93
   0  11   3   21.39    1.42
   0  11  -3   21.43    2.01
   0 -11   3   18.67    2.03
   0  11   3   21.76    2.17
   0 -11   3   21.32    1.94
   0  11  -3   19.27    1.92
   0  11   3   19.32    2.14
   0 -11  -3   25.23    2.29
   0  11  -3   21.66    2.19
   0  11   4  245.81    6.14
   0  11  -4  287.11    8.38
   0 -11  -4  273.44    8.74
   0  11   4  258.85    6.93
   0  11  -4  263.11    8.78
   0  11   4  264.32    8.40
   0 -11   4  268.66    8.03
   0 -11   4  254.61    7.62
   0 -11  -4  288.14    8.82
   0  11   4  275.01    6.65
   0 -11  -5    0.52    0.93
   0  11   5    0.84    0.85
   0  11   5    0.87    0.59
   0  11   5    0.62    0.75
   0  11   5    0.14    0.69
   0  11  -5   -0.28    0.67
   0  11   5    0.42    0.65
   0 -11   5   -0.14    0.69
   0  11  -5   -0.19    0.88
   0 -11  -5    0.18    0.78
   0 -11   6   61.72    2.99
   0  11   6   56.14    2.48
   0  11   6   59.85    2.64
   0  11   6   59.11    2.98
   0 -11  -6   53.77    3.76
   0  11  -6   53.45    3.89
   0  11  -6   63.47    3.59
   0 -11  -6   61.15    4.02
   0  11   6   58.02    3.57
   0  11  -7  135.94    5.44
   0 -11  -7  143.09    6.51
   0  11   7  128.06    4.21
   0  11   7  133.32    4.27
   0 -11  -7  145.52    6.54
   0  11   7  138.92    4.87
   0 -11   7  127.65    4.70
   0  11  -7  136.16    6.62
   0  11   7  128.01    4.45
   0  11   8   -0.27    0.83
   0 -11  -8    2.16    1.23
   0 -11   8   -0.14    0.53
   0  11   8   -0.20    0.98
   0  11   8    0.32    0.83
   0 -11  -8    0.64    0.98
   0  11  -8    1.84    1.21
   0 -11   8    0.30    0.72
   0 -11   9  243.35    6.98
   0 -11  -9  224.74    8.78
   0  11  -9  245.92    9.42
   0 -11   9  244.49    6.28
   0 -11  -9  246.08    9.16
   0  11   9  248.48    7.17
   0  11   9  239.16    6.60
   0 -11   9  252.10    6.78
   0  11   9  256.85    6.87
   0 -11   9  258.47    7.61
   0 -11  10   58.07    2.63
   0 -11  10   56.42    2.34
   0 -11  10   55.23    2.68
   0  11  10   62.01    2.73
   0  11  10   57.25    2.93
   0 -11  10   63.20    3.23
   0 -11  11   35.56    1.87
   0  11  11   36.18    2.19
   0 -11  11   32.66    2.15
   0 -11  11   35.08    1.79
   0  11  11   34.59    1.86
   0  11  12   -0.05    0.51
   0  11  12    0.10    0.52
   0 -11  12   -0.14    0.63
   0  11  13   13.80    0.86
   0 -11  13   15.23    0.99
   0  12   0  647.50   13.52
   0  12   0  645.25   15.91
   0 -12   0  678.31   15.77
   0  12   0  660.24   15.38
   0  12  -1  105.55    4.57
   0 -12  -1  105.86    4.93
   0  12   1  108.20    4.99
   0 -12   1  103.43    4.72
   0 -12  -1   98.19    3.96
   0  12  -1  104.77    3.45
   0  12   1   98.17    3.44
   0  12   1  104.33    4.59
   0 -12  -1  101.57    4.72
   0 -12   1  119.58    5.08
   0  12  -1   98.18    4.77
   0 -12  -2  156.41    6.19
   0 -12   2  163.87    5.91
   0  12   2  170.19    6.56
   0 -12   2  160.52    6.26
   0  12  -2  164.44    6.02
   0  12  -2  164.16    4.62
   0  12  -2  161.12    6.42
   0  12   2  160.19    6.29
   0 -12  -2  175.90    6.42
   0 -12   2  169.45    6.08
   0  12   2  161.71    4.40
   0  12   2  164.58    4.79
   0 -12   3  121.47    5.34
   0  12   3  120.51    5.32
   0  12  -3  120.34    5.48
   0 -12  -3  116.61    5.24
   0 -12  -3  118.81    5.36
   0  12  -3  119.78    5.14
   0 -12   3  120.83    4.95
   0 -12   3  112.54    4.80
   0  12   3  122.76    3.93
   0  12  -3  118.75    5.04
   0  12   3  111.08    5.34
   0  12   3  113.12    3.61
   0  12  -3  109.56    3.56
   0  12   4    3.93    0.80
   0 -12  -4    3.62    1.21
   0  12  -4    3.10    1.07
   0 -12   4    2.65    0.85
   0  12   4    2.87    0.68
   0 -12  -4    3.69    1.20
   0  12  -4    2.58    0.98
   0  12   4    2.66    0.77
   0  12  -4    2.57    1.21
   0  12   4    2.48    1.05
   0 -12  -5    0.94    1.01
   0 -12  -5    1.87    1.10
   0  12   5    0.71    0.59
   0  12   5    1.34    0.95
   0  12  -5    1.24    0.96
   0  12   5    0.99    0.78
   0  12   5    1.31    0.67
   0  12  -5    1.58    1.13
   0 -12  -6    0.60    1.01
   0 -12  -6    1.20    1.02
   0  12  -6    1.70    1.27
   0  12   6    0.84    0.68
   0  12  -6    0.46    0.85
   0 -12   6    1.89    0.81
   0  12   6    0.80    0.67
   0  12   6    0.75    0.81
   0  12   6    4.09    1.43
   0  12   7   13.73    1.74
   0  12  -7   12.94    2.14
   0 -12  -7   11.65    1.99
   0  12   7   11.17    1.21
   0  12   7   12.65    1.28
   0 -12  -7   12.29    2.04
   0 -12   7   11.44    1.41
   0  12   8   12.40    1.20
   0 -12  -8   15.10    2.24
   0 -12  -8   12.10    2.07
   0  12   8   17.72    1.81
   0  12   8   14.08    1.35
   0  12  -8    9.51    1.96
   0 -12   8   12.67    1.48
   0  12   8   13.29    1.48
   0 -12   9   32.14    1.99
   0  12   9   31.61    1.97
   0 -12   9   30.71    2.10
   0  12   9   36.09    2.40
   0 -12   9   27.56    2.26
   0 -12  -9   32.95    3.08
   0  12   9   32.70    2.07
   0 -12  10   12.69    1.28
   0 -12  10   13.82    1.61
   0  12  10   15.94    1.37
   0  12  10   13.76    1.33
   0 -12  11   29.55    1.93
   0  12  11   26.94    1.55
   0 -12  11   26.00    1.51
   0 -12  12   26.45    1.53
   0  12  12   26.32    1.29
   0 -12  13    9.58    0.63
   0  12  13    7.58    0.53
   0 -13   0    0.32    0.82
   0  13   0   -0.34    0.82
   0  13   0   -0.07    0.55
   0  13   0    0.43    0.71
   0  13  -1   17.39    2.14
   0  13   1   18.74    1.99
   0  13   1   16.21    1.36
   0  13  -1   19.34    2.01
   0 -13  -1   18.41    2.07
   0  13  -1   17.87    1.39
   0 -13  -1   19.54    2.67
   0  13   1   15.89    2.06
   0 -13   1   18.82    2.12
   0  13  -2  203.21    5.47
   0  13   2  202.46    7.61
   0 -13  -2  201.35    7.35
   0 -13   2  196.49    6.99
   0 -13  -2  198.87    7.45
   0 -13  -2  195.06    6.41
   0  13  -2  205.74    7.63
   0  13   2  211.11    7.57
   0  13   2  191.92    5.08
   0 -13   2  206.35    7.42
   0  13   2  186.07    5.50
   0 -13   2  193.27    6.81
   0  13  -2  192.47    6.86
   0 -13  -3   98.64    5.00
   0 -13   3   90.04    4.41
   0 -13   3   95.91    4.56
   0  13   3   96.64    5.10
   0  13  -3   95.07    3.31
   0  13   3  100.40    5.04
   0  13   3   94.90    3.59
   0  13  -3   92.15    4.99
   0 -13  -3  103.37    5.05
   0  13  -3  105.36    4.82
   0  13   3   94.60    3.29
   0  13  -4  133.70    6.27
   0  13   4  142.37    4.57
   0  13  -4  137.23    5.80
   0  13   4  134.09    4.31
   0  13   4  138.88    6.04
   0 -13  -4  140.63    6.23
   0 -13  -4  139.00    6.18
   0  13  -5   13.47    1.83
   0  13   5   15.81    2.02
   0  13   5   14.30    1.40
   0  13  -5   15.09    2.19
   0  13   5   12.55    1.34
   0  13   5   14.58    1.19
   0 -13  -5   13.12    1.98
   0 -13  -5   13.23    1.97
   0 -13   6    9.76    1.32
   0 -13  -6   11.79    2.00
   0 -13  -6   10.38    1.91
   0  13   6   12.62    1.19
   0  13   6   10.02    1.31
   0  13  -6   11.16    1.98
   0  13  -6    7.76    1.57
   0  13   6   12.88    1.32
   0  13   7   56.72    2.53
   0  13  -7   51.97    3.64
   0 -13  -7   50.89    3.88
   0 -13  -7   56.48    3.97
   0 -13   7   56.88    2.99
   0  13   7   54.60    2.57
   0  13   7   50.82    2.69
   0  13  -7   56.52    4.13
   0  13   8   10.60    1.12
   0 -13   8   12.44    1.41
   0  13  -8   13.61    2.21
   0 -13  -8   13.66    2.11
   0  13   8   13.91    1.35
   0 -13  -8   10.13    1.82
   0 -13   9    9.81    1.45
   0 -13   9    9.95    1.26
   0  13   9    9.51    1.23
   0  13   9    9.93    1.15
   0  13  10   30.74    1.79
   0 -13  10   25.24    1.71
   0 -13  10   31.65    2.13
   0  13  10   31.29    1.73
   0 -13  11   23.84    1.62
   0  13  11   22.44    1.35
   0  13  11   22.92    1.32
   0  13  12    0.03    0.46
   0 -13  12    0.31    0.43
   0  13  12    0.60    0.40
   0  14   0  466.48   12.78
   0 -14   0  487.69   13.30
   0  14   0  477.49   10.97
   0 -14   0  517.50   13.49
   0  14   0  481.86   13.63
   0  14  -1    2.28    1.10
   0  14   1    4.04    1.35
   0 -14   1    3.71    1.27
   0  14  -1    4.06    1.12
   0  14  -1    3.76    0.85
   0 -14  -1    2.97    1.19
   0  14   1    3.91    0.87
   0  14   1    3.05    1.13
   0  14   1    2.85    1.23
   0  14   2  116.02    5.63
   0 -14  -2  114.61    5.43
   0  14  -2  111.48    5.60
   0  14   2  104.84    5.54
   0 -14  -2  107.05    5.73
   0 -14   2  107.90    5.34
   0  14  -2  107.16    5.01
   0 -14   2  116.26    5.25
   0  14  -2  119.72    3.92
   0 -14   2  112.59    5.07
   0  14   3   68.33    3.02
   0  14  -3   72.10    4.00
   0  14   3   67.35    2.72
   0  14  -3   58.71    4.10
   0  14   3   66.84    4.33
   0 -14  -3   65.87    4.11
   0  14  -3   65.99    2.72
   0 -14  -3   58.04    4.30
   0  14   3   68.59    4.24
   0  14  -4    0.50    0.69
   0  14   4    0.73    0.76
   0 -14  -4    1.15    0.94
   0  14   4    0.19    0.90
   0  14  -4    0.42    0.95
   0 -14  -4   -0.61    1.07
   0 -14  -4    0.79    1.08
   0  14   4   -0.09    0.63
   0 -14  -5    0.20    0.92
   0  14   5    0.06    0.65
   0  14   5    0.24    0.77
   0  14  -5   -0.17    0.76
   0  14   5    0.26    0.64
   0  14  -5    0.22    0.95
   0 -14  -5    1.23    1.05
   0  14   6   29.12    1.99
   0  14   6   27.62    1.97
   0  14   6   26.83    1.69
   0 -14   6   29.81    2.18
   0  14  -6   24.23    2.47
   0  14  -6   26.49    2.88
   0 -14  -6   31.50    2.94
   0 -14  -6   31.92    3.04
   0 -14  -7   23.84    2.61
   0  14   7   30.94    1.92
   0  14  -7   24.72    2.75
   0  14   7   29.97    1.79
   0 -14   7   31.63    2.21
   0 -14  -7   29.59    2.91
   0  14   7   29.23    2.02
   0 -14   8    1.59    0.72
   0  14   8    0.93    0.58
   0  14   8    0.55    0.67
   0  14   9   23.02    1.50
   0 -14   9   20.77    1.63
   0 -14   9   22.55    1.91
   0  14   9   24.05    1.64
   0 -14  10   29.82    1.69
   0  14  10   28.08    1.51
   0  14  10   28.00    1.60
   0 -14  10   26.67    1.81
   0  14  11   14.37    0.97
   0 -14  11   16.81    1.21
   0  14  11   16.79    1.08
   0  14  12    4.47    0.42
   0  14  12    5.94    0.47
   0 -14  12    4.91    0.52
   0 -15   0    0.93    1.06
   0  15   0   -0.21    1.03
   0  15   0    0.66    0.80
   0  15   0    0.51    0.58
   0  15   1  378.43   11.98
   0  15   1  389.68    9.57
   0 -15  -1  417.24   12.25
   0 -15   1  379.41   11.10
   0  15  -1  397.90   11.28
   0 -15   1  391.63   11.76
   0 -15  -1  398.18   11.76
   0  15  -1  396.20    9.45
   0  15   1  399.51   12.27
   0  15  -1  396.14   12.15
   0 -15   1  384.87   11.56
   0  15  -2  300.10    7.63
   0 -15  -2  305.99    9.94
   0 -15  -2  306.91   10.57
   0 -15   2  292.28    9.51
   0  15   2  305.88   10.34
   0 -15   2  304.52   10.03
   0  15   2  312.59   10.34
   0  15  -2  305.18   10.32
   0  15  -2  300.04    9.43
   0  15   3   13.37    2.01
   0  15   3   13.35    1.25
   0  15  -3   13.34    2.09
   0 -15  -3   13.88    1.98
   0 -15  -3   12.19    3.09
   0  15  -3   13.50    1.25
   0  15   3   14.82    1.47
   0  15  -3   10.46    1.71
   0 -15   4   37.47    2.35
   0  15   4   37.63    3.18
   0  15  -4   35.71    3.27
   0  15  -4   32.05    2.75
   0 -15  -4   29.18    3.62
   0  15   4   38.01    2.26
   0  15   4   37.04    2.06
   0 -15  -4   32.48    2.92
   0  15  -5   42.54    2.31
   0  15   5   42.00    2.39
   0 -15  -5   40.03    3.25
   0  15   5   44.48    2.32
   0  15  -5   42.46    3.60
   0  15   6   -0.24    0.78
   0 -15   6    0.50    0.84
   0  15   6    0.34    0.72
   0  15  -6   -0.22    0.92
   0 -15  -6   -0.38    0.88
   0 -15  -6    1.86    1.20
   0 -15  -6   -1.33    1.32
   0  15   6    0.55    0.65
   0  15   7   41.31    2.17
   0  15   7   40.17    1.96
   0  15   7   44.83    2.35
   0 -15   7   39.47    2.42
   0  15   8    4.28    0.77
   0  15   8    3.89    0.95
   0  15   8    5.43    0.85
   0 -15   8    4.47    0.96
   0 -15   9    1.43    0.63
   0  15   9    2.77    0.69
   0 -15   9    2.29    0.89
   0 -15  10   14.03    1.25
   0 -15  10   14.01    1.06
   0  15  10   14.52    1.09
   0  15  10   12.76    0.96
   0  15  11   -0.35    0.40
   0 -15  11    0.91    0.44
   0  15  11    0.20    0.41
   0  16   0  543.85   15.44
   0  16   0  562.52   12.59
   0 -16   0  562.66   15.12
   0  16   0  540.99   15.48
   0  16  -1  359.49    8.84
   0  16  -1  338.18   11.32
   0 -16  -1  376.51   11.39
   0 -16  -1  345.20   10.94
   0  16   1  348.77    8.85
   0 -16   1  363.92   11.21
   0  16   1  344.47   11.37
   0  16   1  343.63   11.32
   0 -16   1  352.21   10.86
   0  16   2  112.85    5.79
   0 -16  -2  101.24    5.25
   0  16  -2  113.50    3.97
   0  16  -2  100.35    5.56
   0  16   2  110.19    5.77
   0  16   3   18.18    2.29
   0 -16   3   17.97    1.64
   0 -16  -3   15.98    2.11
   0  16  -3   16.69    2.26
   0  16   3   16.90    1.59
   0  16   3   16.22    1.33
   0  16  -3   16.02    1.34
   0  16   4   71.22    3.20
   0  16  -4   72.67    4.63
   0 -16   4   78.51    3.43
   0  16   4   71.79    2.88
   0 -16  -4   84.95    5.84
   0 -16  -4   69.26    4.23
   0  16   5    1.23    0.74
   0  16   5    0.74    0.73
   0 -16  -5    1.27    0.93
   0  16  -5    0.65    0.63
   0  16  -5    0.21    0.90
   0 -16   5    1.27    0.86
   0  16   6   14.06    1.36
   0  16   6   14.88    1.34
   0  16   7    0.83    0.61
   0  16   7    2.46    0.65
   0 -16   7    1.05    0.75
   0  16   7    1.28    0.73
   0  16   8    9.64    0.92
   0 -16   8   11.14    1.21
   0  16   8   12.08    0.96
   0  16   8   12.87    1.18
   0  16   9    0.92    0.58
   0  16   9    1.58    0.63
   0 -16   9    2.04    0.77
   0 -16   9    2.75    0.68
   0 -16  10    7.42    0.64
   0  16  10    7.13    0.59
   0  17   0   -0.44    1.01
   0  17   0   -0.09    0.68
   0 -17   0    1.13    0.97
   0  17   0   -0.21    0.93
   0 -17   0    0.57    1.23
   0  17   1    4.01    1.35
   0  17  -1    2.56    1.26
   0 -17   1    3.60    1.23
   0 -17  -1    2.05    1.00
   0  17   1    3.17    0.91
   0  17  -1    2.88    1.28
   0  17   1    4.06    1.38
   0  17  -1    3.17    0.86
   0 -17   2   12.81    1.35
   0  17   2   11.68    2.03
   0 -17  -2   10.64    1.73
   0  17  -2   11.01    1.98
   0  17   2   12.42    1.97
   0  17  -2   12.11    1.25
   0  17   3   14.91    1.46
   0 -17   3   14.23    1.48
   0  17   3   12.40    1.96
   0  17  -3   12.77    2.01
   0 -17  -3   12.17    1.83
   0 -17   4    0.27    0.66
   0  17   4    0.26    0.66
   0  17  -4    0.41    0.84
   0  17   4   -0.06    0.58
   0  17   5   13.47    1.35
   0  17   5   14.72    1.28
   0  17  -5   15.69    1.33
   0 -17   5   16.35    1.56
   0  17   6   13.00    1.26
   0  17   6   15.33    1.27
   0  17   7    4.24    0.84
   0 -17   7    5.92    0.95
   0  17   7    5.95    0.82
   0 -17   8   17.14    1.30
   0 -17   8   16.96    1.45
   0  17   8   15.98    1.17
   0  17   8   18.86    1.10
   0 -17   9    3.86    0.73
   0  17  -9    2.85    0.48
   0  17   9    3.28    0.61
   0 -17   9    3.42    0.60
   0  17  10   12.06    0.71
   0 -17  10   10.64    0.76
   0  18   0   55.26    3.92
   0  18   0   53.51    3.92
   0 -18   0   56.59    2.41
   0  18   0   54.14    2.65
   0 -18   1   16.24    1.36
   0  18  -1   14.73    1.36
   0  18   1   11.09    1.30
   0  18   1   12.52    2.01
   0  18  -1   11.72    2.03
   0 -18   2    1.65    0.73
   0 -18   3   15.47    1.45
   0  18   3   15.97    1.47
   0  18   4    0.89    0.67
   0  18  -4    1.48    0.70
   0 -18   4    0.90    0.68
   0  18  -5   18.34    1.33
   0 -18   5   20.25    1.57
   0  18   5   18.36    1.49
   0  18   5   17.48    1.24
   0 -18   6    3.25    0.81
   0  18   6    3.58    0.70
   0  18   6    2.82    0.68
   0  18   7    6.81    0.79
   0  18   7    6.23    0.75
   0 -18   8    0.54    0.47
   0 -18   8    0.39    0.55
   0  18   8    0.15    0.43
   0 -18   9    1.24    0.46
   0  18   9    1.01    0.37
   0  19   0    0.23    0.56
   0  19   1   16.59    1.47
   0  19  -1   17.93    1.40
   0 -19   1   20.58    1.38
   0 -19   2    0.80    0.61
   0  19   2    0.78    0.66
   0 -19   3   39.40    2.05
   0  19   3   36.08    2.07
   0  19  -4   53.81    2.32
   0 -19   4   50.91    2.33
   0  19   4   49.02    2.35
   0  19  -5   31.10    1.50
   0  19   5   27.28    1.45
   0  19   5   27.04    1.62
   0 -19   5   27.49    1.67
   0 -19   6    5.61    0.81
   0  19   6    5.00    0.61
   0  19   6    5.27    0.76
   0  19   7    8.39    0.72
   0  19   7    9.34    0.70
   0  19  -8    0.17    0.28
   0 -19   8   -0.07    0.38
   0 -19   8    0.03    0.33
   0  20   1   13.47    1.19
   0 -20   1   11.62    0.92
   0  20  -2    0.14    0.61
   0  20   2    0.20    0.56
   0 -20   2    0.21    0.47
   0 -20   3    4.59    0.72
   0  20  -3    6.95    0.90
   0  20  -4    2.39    0.58
   0 -20   4    1.93    0.58
   0  20   4    2.43    0.59
   0  20   4    1.84    0.58
   0 -20   5    0.81    0.48
   0  20  -5    0.91    0.33
   0  20   5    1.38    0.52
   0  20   6    8.32    0.67
   0 -20   6    9.02    0.80
   0 -20   7    4.21    0.58
   0 -20   7    4.58    0.50
   0  21   0   -0.30    0.54
   0  21   1   -0.06    0.53
   0  21  -2    0.27    0.48
   0  21   2   -0.27    0.49
   0 -21   2   -0.28    0.33
   0  21   3    1.33    0.51
   0 -21   3    1.09    0.38
   0  21  -3    1.53    0.50
   0  21   4    8.38    0.67
   0 -21   4    7.42    0.64
   0  21  -4    7.11    0.63
   0  21   5   13.76    0.83
   0 -21   5   14.47    0.79
   0 -21   6    2.18    0.40
   0  22   0   44.26    1.75
   0  22  -1   32.60    1.47
   0  22   1   35.46    1.52
   0  22  -2    9.00    0.73
   0  22   2   11.39    0.81
   0  22   3    0.03    0.26
   0  22  -3    0.20    0.26
   0  22   4    2.16    0.35
  -1   0  15   23.38    1.22
  -1   0  15   22.26    1.03
  -1   0  14    7.82    0.97
  -1   0  14    8.97    1.10
  -1   0  14    8.98    1.03
  -1   0  13    1.63    0.73
  -1   0  13    2.11    0.85
  -1   0  13    0.94    0.81
   1   0 -12    0.20    0.91
  -1   0  12    0.43    0.92
  -1   0  12    0.58    0.79
  -1   0  12   -0.44    0.86
  -1   0  12   -0.10    0.80
  -1   0  11   81.58    3.53
  -1   0  11   75.83    3.63
  -1   0  11   71.94    3.43
  -1   0  11   74.32    3.30
  -1   0  10   53.66    2.99
  -1   0  10   54.92    2.87
  -1   0  10   54.06    2.70
  -1   0  10   57.22    2.84
  -1   0   9  374.63    9.25
  -1   0   9  378.43    9.01
  -1   0   9  383.33    9.55
  -1   0   9  383.03    9.20
  -1   0   8  425.69    9.57
  -1   0   8  410.59    9.69
  -1   0   8  408.45    9.88
  -1   0   8  431.09    9.47
   1   0  -7    8.56    0.85
  -1   0   7    6.26    1.15
  -1   0   6  598.70   13.39
   1   0  -6  598.24   12.00
   1   0  -5 1398.61   26.01
  -1   0   5 1443.83   27.40
   1   0  -4    9.02    0.58
  -1   0   4    9.34    1.01
  -1   0   4    8.85    0.51
  -1   0   3 2934.58   52.36
  -1   0   2 3259.97   58.14
  -1   0   1  209.40    3.91
   1   0  -1  208.17    4.08
  -1   0   1  218.79    4.24
  -1   0   1  198.80    4.43
  -1   0   1  204.53    4.05
   1   0  -1  211.71    4.27
   1   0  -1  209.98    4.03
   1   0   0    2.76    0.28
  -1   0   0    2.28    0.29
  -1   0   0    3.25    0.26
   1   0   0    2.67    0.21
  -1   0   0    2.86    0.39
  -1   0   0    2.66    0.29
  -1   0  -1  906.47   17.51
  -1   0  -1  970.17   17.10
   1   0   2  901.67   16.65
  -1   0  -2  937.10   16.98
  -1   0  -3 1046.95   18.79
   1   0   3 1026.30   18.34
   1   0   3 1017.41   19.48
   1   0   4    3.56    0.68
  -1   0  -4    4.03    0.39
   1   0   4    2.96    0.64
   1   0   5 3918.41   71.33
   1   0   6  568.94   12.78
  -1   0  -6  577.43   13.18
   1   0   7   68.35    3.25
  -1   0  -7   66.97    3.39
   1   0   8    4.00    1.00
  -1   0  -8    4.69    1.12
   1   0   8    3.94    0.71
   1   0   8    3.54    0.83
   1   0   8    5.13    0.95
   1   0   8    5.15    0.92
   1   0   9   41.85    2.33
   1   0   9   37.63    2.39
   1   0   9   43.04    2.56
  -1   0  -9   38.55    2.81
  -1   0 -10   12.79    1.71
   1   0  10   14.33    1.45
   1   0  10   14.03    1.69
   1   0  10   15.09    1.64
   1   0  11   32.84    2.27
   1   0  11   30.00    2.02
   1   0  11   29.39    2.31
   1   0  12   13.03    1.57
   1   0  12   15.76    1.39
   1   0  12   15.23    1.63
   1   0  13    2.43    0.85
   1   0  13    3.31    0.89
   1   0  14    1.28    0.56
   1   0  14    0.98    0.58
  -1  -1  15    2.19    0.53
  -1   1  15    2.02    0.48
  -1   1  15    2.97    0.55
  -1   1  14    3.57    0.82
  -1  -1  14    3.50    0.76
  -1  -1  14    5.70    0.93
  -1  -1  14    3.51    0.74
  -1   1  14    4.56    0.86
  -1   1  13   30.26    2.08
  -1  -1  13   28.99    1.89
  -1  -1  13   29.63    2.06
  -1   1  13   29.24    1.96
  -1  -1  13   30.27    2.01
  -1   1  13   30.43    2.01
  -1  -1  12    0.57    0.87
  -1   1  12    1.27    0.93
  -1   1  12    1.07    0.86
   1   1 -12    2.45    1.18
  -1  -1  12    0.29    0.76
  -1   1  12    1.97    0.89
  -1   1  12    0.33    0.95
  -1  -1  12    1.53    0.99
  -1  -1  12    0.95    0.81
  -1  -1  11  105.79    4.00
  -1  -1  11  100.89    4.12
  -1   1  11  105.18    4.12
  -1   1  11   99.92    4.11
  -1  -1  11  107.73    4.17
  -1   1  11  102.65    4.33
  -1   1  11  107.71    3.97
  -1  -1  11  110.27    4.44
  -1  -1  10   27.37    1.91
  -1   1  10   22.87    1.52
  -1   1  10   29.11    2.00
  -1  -1  10   24.61    2.05
  -1   1  10   26.90    2.03
  -1  -1  10   27.32    1.98
  -1  -1  10   25.97    1.98
  -1   1  10   24.54    1.83
  -1   1  10   24.65    2.05
  -1  -1   9   39.25    2.14
  -1   1   9   39.17    2.33
  -1  -1   9   40.36    2.25
  -1  -1   9   39.78    2.43
  -1   1   9   41.26    2.18
  -1   1   9   37.39    2.34
  -1  -1   9   42.90    2.35
  -1   1   9   38.71    1.90
  -1   1   9   41.91    2.25
  -1  -1   8    0.36    0.55
  -1  -1   8    0.85    0.57
  -1   1   8    0.84    0.62
  -1   1   8    1.85    0.80
  -1   1   8    1.28    0.61
  -1  -1   8    0.44    0.64
  -1   1   8    0.45    0.69
  -1   1   8    3.09    0.69
  -1   1   8    0.76    0.72
  -1  -1   8    0.59    0.69
  -1   1   7   89.04    3.82
   1  -1  -7   82.49    2.90
  -1   1   6  314.88    8.22
   1   1  -6  317.40    6.71
   1   1  -6  316.18    6.93
  -1  -1   6  332.11    8.34
  -1  -1   5   12.43    1.24
   1   1  -5   13.09    0.81
  -1   1   5   12.05    1.22
   1   1  -5   13.12    0.87
  -1  -1   4  793.01   16.26
  -1   1   4  837.77   16.33
   1   1  -4  809.44   14.97
  -1   1   4  795.99   14.97
  -1  -1   4  814.80   14.82
  -1  -1   3 2223.92   39.81
   1   1  -3 2200.18   39.43
  -1   1   3 2226.59   39.86
  -1   1   3 2275.95   40.77
  -1  -1   2  128.22    3.32
  -1  -1   2  130.34    3.04
  -1   1   2  129.40    3.01
   1   1  -1  502.15    9.19
  -1   1   1  500.60    8.99
  -1   1   1  473.33    9.29
  -1   1   1  461.42    9.30
  -1  -1   1  480.10    9.46
   1  -1  -1  481.69    9.24
   1   1  -1  481.25    8.96
  -1  -1   1  484.37    9.19
  -1  -1   0   65.71    1.75
  -1   1   0   64.38    1.76
   1   1   0   68.39    1.69
  -1   1   0   68.48    1.75
   1   1   0   71.40    1.70
  -1  -1   0   64.63    1.62
  -1   1   0   67.29    1.88
  -1   1  -1  559.45   11.01
   1   1   1  568.12   10.76
  -1   1  -1  574.83   10.82
   1   1   2 2428.84   43.23
   1  -1   2 2491.08   43.54
  -1   1  -2 2443.62   43.32
  -1   1  -2 2391.56   43.94
   1  -1   3    8.68    0.76
   1  -1   3    7.58    0.80
   1   1   3    8.00    0.51
   1   1   3    6.95    0.42
   1  -1   3    7.10    0.73
   1   1   3    8.46    0.79
  -1   1  -3    8.64    0.55
  -1   1  -4  417.22    7.95
   1  -1   4  436.52    9.23
  -1  -1  -4  421.67    8.35
   1  -1   4  434.75    9.15
  -1   1  -4  405.31    9.51
  -1  -1  -5    2.51    0.33
  -1   1  -5    2.52    0.79
   1  -1   5    3.08    0.70
   1  -1   6 1111.04   22.33
  -1   1  -6 1120.46   22.88
  -1  -1  -7   59.48    3.25
   1   1   7   55.10    2.98
  -1   1  -7   61.13    3.21
   1   1   8  315.82    8.00
  -1   1  -8  350.48    9.68
   1  -1   8  328.15    8.41
   1  -1   8  336.42    8.29
   1  -1   8  316.09    8.02
   1   1   8  336.72    7.60
   1  -1   8  328.03    8.14
   1   1   8  339.91    8.47
   1   1   8  342.08    8.24
   1  -1   8  335.95    8.29
  -1  -1  -8  345.11    9.71
   1  -1   9   28.97    2.15
  -1   1  -9   30.81    2.54
   1  -1   9   29.09    2.00
   1   1   9   29.00    2.13
   1   1   9   29.44    1.96
   1  -1   9   31.32    2.04
   1   1   9   31.25    1.73
  -1  -1  -9   28.23    2.47
   1  -1   9   23.86    1.91
   1   1  10   17.74    1.60
   1  -1  10   18.00    1.78
   1  -1  10   20.90    1.73
   1  -1  10   18.80    1.76
   1   1  10   18.93    1.39
  -1   1 -10   20.92    2.10
   1   1  10   20.33    1.91
   1  -1  10   19.79    1.90
  -1  -1 -10   16.94    1.98
   1  -1  11   15.69    1.72
   1   1  11   18.11    1.59
   1  -1  11   18.54    1.87
   1  -1  11   17.22    1.71
   1   1  11   19.14    1.40
   1   1  11   19.14    1.89
   1  -1  11   17.17    1.56
   1  -1  12  170.91    5.55
   1   1  12  163.18    5.44
   1   1  12  164.95    5.34
   1   1  12  152.40    4.76
   1  -1  12  159.54    5.22
   1  -1  12  157.97    4.86
   1  -1  12  161.85    5.34
   1  -1  13    0.84    0.79
   1   1  13    0.31    0.76
   1   1  13    0.42    0.74
   1  -1  13    0.63    0.72
   1  -1  14    4.51    0.79
   1  -1  14    5.34    0.81
   1   1  14    4.71    0.79
   1   1  14    4.53    0.77
  -1   2  15   11.88    0.80
  -1   2  15   10.15    0.80
  -1  -2  15   10.90    0.81
  -1  -2  14    0.88    0.70
  -1  -2  14    0.21    0.57
  -1   2  14    0.60    0.63
  -1   2  14    0.48    0.63
  -1  -2  14    0.98    0.66
  -1   2  13   10.85    1.40
  -1   2  13   11.67    1.30
  -1  -2  13   11.14    1.27
  -1   2  13   10.44    1.25
  -1  -2  13   11.71    1.39
  -1  -2  13   12.44    1.37
  -1  -2  12   10.52    1.31
  -1   2  12   10.24    1.08
  -1   2  12   12.26    1.39
  -1   2  12   12.69    1.47
  -1   2  12    8.93    1.44
  -1  -2  12   10.22    1.39
  -1  -2  12   11.44    1.50
  -1   2  12   11.97    1.40
   1   2 -12    7.78    1.67
   1   2 -11    7.22    1.62
  -1   2  11   11.80    1.22
  -1  -2  11    9.63    1.53
  -1  -2  11    9.67    1.34
  -1   2  11    9.42    1.26
  -1  -2  11    9.19    1.35
  -1   2  11    8.95    1.45
  -1   2  11    8.50    1.30
  -1   2  11   10.29    1.41
  -1   2  10   44.37    2.62
  -1   2  10   45.17    2.42
  -1   2  10   41.56    2.64
  -1  -2  10   48.09    2.79
  -1  -2  10   44.70    2.53
  -1   2  10   42.54    2.47
  -1   2  10   46.12    2.22
  -1  -2  10   46.75    2.57
  -1   2   9  186.28    5.34
  -1   2   9  187.01    5.71
  -1   2   9  185.61    5.08
  -1   2   9  187.40    5.48
  -1  -2   9  180.28    5.51
  -1  -2   9  186.54    5.82
  -1   2   9  188.21    5.86
  -1   2   9  184.97    6.62
  -1  -2   9  187.59    5.54
  -1   2   8  125.66    3.85
  -1   2   8  116.16    4.16
  -1  -2   8  117.78    4.18
  -1   2   8  122.79    3.90
  -1   2   8  121.20    4.08
  -1   2   8  117.30    3.60
  -1  -2   8  123.17    3.95
  -1  -2   8  115.90    3.90
  -1   2   8  119.55    4.90
  -1   2   7  338.79    9.06
  -1   2   6   44.67    2.49
   1   2  -6   47.18    1.59
   1   2  -6   45.52    1.78
  -1  -2   5   88.47    3.37
   1   2  -5   86.68    2.45
  -1   2   5   86.83    3.35
   1   2  -5   90.58    2.55
  -1  -2   4   75.41    2.78
   1   2  -4   69.31    2.18
   1   2  -4   72.26    1.93
  -1  -2   4   68.90    1.84
  -1   2   4   72.25    2.76
  -1   2   4   68.90    2.01
  -1   2   3  440.37    8.63
   1   2  -3  436.28    8.26
  -1  -2   3  446.91    9.36
   1   2  -3  437.63    8.82
  -1  -2   3  429.24    9.20
  -1   2   3  430.79    9.37
  -1   2   2 1570.05   29.81
  -1  -2   2 1614.28   29.83
   1   2  -2 1631.18   28.94
   1   2  -2 1604.98   29.56
   1   2  -2 1626.16   29.69
  -1  -2   2 1627.49   29.71
  -1   2   2 1622.96   29.43
   1  -2  -1  108.36    2.31
   1   2  -1  111.47    2.81
  -1   2   1  112.18    2.60
  -1  -2   1  117.72    2.84
  -1   2   1  107.57    2.75
  -1   2   1  114.09    2.89
  -1  -2   1  110.23    2.89
  -1   2   1  111.71    2.39
   1   2  -1  108.65    2.17
  -1  -2   0  324.36    6.56
   1   2   0  320.25    6.11
  -1   2   0  316.69    6.43
  -1   2   0  324.19    6.04
   1   2   0  317.20    6.45
  -1   2   0  301.12    6.41
  -1   2   0  308.54    6.43
  -1  -2  -1    6.49    0.66
  -1   2  -1    5.92    0.54
   1   2   1    6.95    0.59
   1  -2   2  238.18    4.92
   1   2   2  231.18    4.50
   1   2   2  231.43    5.00
  -1   2  -2  231.18    4.87
   1  -2   2  226.19    5.22
  -1   2  -2  231.52    5.44
   1   2   2  228.67    5.32
   1  -2   3  275.77    6.33
  -1   2  -3  280.92    5.64
   1   2   3  284.21    5.88
   1   2   3  281.82    6.48
   1   2   3  270.86    5.50
   1  -2   3  274.31    6.60
   1  -2   3  286.39    6.08
   1  -2   4    0.28    0.46
   1   2   4    0.44    0.50
  -1   2  -4    1.61    0.61
  -1   2  -4    0.23    0.21
   1   2   4    0.36    0.29
   1  -2   4    0.30    0.40
   1   2   4    0.79    0.29
   1  -2   4    0.29    0.51
   1  -2   5  309.01    7.36
  -1  -2  -5  293.24    6.31
   1   2   5  294.33    7.53
  -1   2  -5  310.68    7.76
   1  -2   5  298.08    7.12
   1  -2   6   11.03    1.18
  -1   2  -6    8.78    1.24
   1   2   7   27.85    1.66
   1  -2   7   34.02    1.96
   1   2   7   31.71    1.86
   1  -2   7   31.26    1.76
   1   2   7   30.34    1.78
  -1   2  -7   34.38    2.41
   1   2   8   96.88    3.52
   1  -2   8   89.79    3.53
   1   2   8   92.41    3.65
   1  -2   8   95.83    3.60
   1   2   8   89.38    3.48
  -1   2  -8   96.05    4.36
   1   2   8  100.24    3.20
   1  -2   8   94.06    3.48
   1   2   8   89.67    3.54
  -1  -2  -8   93.55    4.47
   1  -2   8   90.20    3.65
   1   2   8   88.73    3.36
   1  -2   9   75.12    3.26
  -1  -2  -9   74.96    4.08
   1   2   9   70.94    3.13
   1   2   9   77.89    3.37
   1  -2   9   73.02    3.24
   1  -2   9   75.27    3.35
   1   2   9   75.89    3.44
   1  -2   9   73.32    3.44
  -1   2  -9   71.06    3.85
   1   2   9   75.70    2.86
  -1  -2 -10    1.78    0.91
   1   2  10    1.34    0.95
   1   2  10    2.87    0.78
   1  -2  10    1.35    0.92
   1   2  10    1.77    0.78
  -1   2 -10    1.03    0.74
   1   2  10    2.16    0.98
   1  -2  10    1.29    0.88
   1  -2  10    0.91    0.90
   1  -2  10    2.26    0.81
   1  -2  11    5.24    1.13
  -1  -2 -11    3.93    1.52
   1   2  11    5.63    1.24
   1   2  11    6.05    1.22
   1  -2  11    7.47    1.36
   1  -2  11    6.21    1.07
   1  -2  11    6.31    1.27
   1   2  11    5.51    1.01
   1   2  11    8.08    1.04
   1   2  12   19.73    1.34
   1  -2  12   16.44    1.69
   1   2  12   14.94    1.65
   1   2  12   16.93    1.39
   1  -2  12   17.37    1.76
   1  -2  12   15.94    1.42
   1  -2  12   15.94    1.58
   1  -2  13   -0.08    0.79
   1  -2  13    2.09    0.82
   1   2  13    0.24    0.71
   1  -2  14    6.36    0.84
   1   2  14    6.91    0.87
   1  -2  14    8.16    0.90
  -1   3  15    2.79    0.53
  -1   3  15    2.12    0.47
  -1  -3  15    2.18    0.49
  -1  -3  14    9.87    1.09
  -1   3  14    8.19    1.02
  -1   3  14    8.03    0.95
  -1  -3  14    7.39    0.84
  -1  -3  13    5.52    1.14
  -1   3  13    4.30    0.90
  -1  -3  13    5.33    0.95
  -1   3  13    4.78    1.03
  -1  -3  13    4.39    0.93
  -1   3  13    3.57    0.78
  -1   3  13    5.19    1.08
  -1  -3  12   74.26    3.41
  -1  -3  12   81.75    3.44
  -1  -3  12   77.25    3.25
  -1   3  12   90.81    3.86
  -1  -3  12   85.53    3.77
  -1   3  12   81.02    3.04
  -1   3  12   87.27    3.57
  -1   3  12   83.39    3.57
  -1   3  12   79.07    3.26
   1  -3 -11   55.26    4.04
  -1  -3  11   57.80    2.87
  -1   3  11   61.00    3.15
  -1  -3  11   52.06    2.89
  -1   3  11   64.47    2.95
  -1   3  11   58.30    3.17
  -1  -3  11   58.04    2.96
  -1   3  11   58.17    2.95
  -1  -3  11   59.71    3.24
  -1   3  11   59.50    2.65
   1   3 -11   50.47    3.86
  -1   3  10    1.58    0.86
   1   3 -10    0.62    1.00
  -1  -3  10    0.67    0.84
  -1   3  10    0.46    0.72
  -1   3  10    1.31    0.77
  -1  -3  10    1.78    0.79
  -1   3  10    2.24    0.95
  -1  -3  10    1.95    0.90
  -1   3  10    2.34    0.99
  -1   3   9  102.08    4.04
  -1  -3   9  100.81    3.65
  -1  -3   9   95.94    3.96
  -1   3   9  103.91    3.97
  -1   3   9   99.52    3.46
  -1  -3   9  100.32    3.77
  -1   3   9  103.20    3.73
  -1   3   9  102.67    3.62
  -1   3   9  105.15    4.71
  -1  -3   8   10.96    1.14
  -1   3   8    9.00    1.20
  -1   3   8   10.98    1.14
  -1   3   8    8.87    1.21
  -1   3   8   10.46    1.05
  -1   3   8    9.65    1.04
  -1  -3   8    8.43    1.19
  -1   3   8    9.04    1.37
  -1  -3   8   10.79    1.18
  -1   3   7  206.18    6.52
  -1   3   6  183.53    5.73
   1   3  -6  181.94    4.52
   1   3  -5  868.29   16.72
   1   3  -5  891.36   16.76
  -1   3   5  881.41   18.18
  -1   3   4  469.62    9.46
   1   3  -4  469.60    9.25
  -1  -3   4  463.48   10.18
  -1  -3   4  463.95    9.18
  -1   3   4  459.20   10.40
   1   3  -4  482.50    9.53
   1   3  -3  243.36    5.89
  -1   3   3  240.85    5.94
  -1  -3   3  227.27    5.77
  -1   3   3  249.94    5.34
   1   3  -3  241.89    5.03
   1   3  -3  236.87    5.37
   1  -3  -2 4280.93   75.76
   1   3  -2 4271.08   75.98
   1   3  -2 4281.51   76.25
  -1   3   2 4203.01   75.86
   1   3  -2 4208.79   75.52
  -1  -3   2 4322.57   76.30
  -1  -3   2 4224.60   75.32
  -1  -3   2 4222.54   76.25
  -1   3   2 4272.77   76.35
  -1  -3   1 4678.18   83.02
  -1   3   1 4825.52   82.78
  -1   3   1 4703.42   82.44
  -1   3   1 4790.30   82.70
  -1   3   1 4582.88   83.04
  -1  -3   1 4644.64   82.07
   1  -3  -1 4629.46   82.33
  -1  -3   1 4595.32   82.97
  -1   3   0   57.72    1.64
  -1   3   0   56.58    1.85
  -1  -3   0   53.76    1.96
   1  -3   0   57.19    1.55
   1   3   0   56.60    1.37
  -1   3  -1 2765.25   49.11
   1  -3   1 2760.55   48.52
   1   3   1 2772.17   49.30
  -1   3  -1 2827.61   49.11
  -1   3  -1 2794.19   49.44
   1  -3   2  513.85    9.48
  -1   3  -2  501.47   10.65
   1  -3   2  522.29   10.47
   1   3   2  497.99   10.52
  -1  -3  -2  526.01   10.91
  -1   3  -2  523.68   10.10
   1   3   2  520.40    9.91
   1   3   2  535.44   10.40
   1  -3   2  530.32    9.88
   1  -3   3  151.53    4.32
   1   3   3  147.93    3.75
  -1   3  -3  150.24    3.45
   1  -3   3  157.58    3.65
   1   3   3  149.25    4.12
   1  -3   3  144.65    3.96
   1   3   3  143.91    3.42
   1  -3   4  339.07    8.16
   1   3   4  337.11    7.93
   1   3   4  313.10    6.89
  -1   3  -4  334.45    8.07
  -1   3  -4  341.98    6.67
   1  -3   4  351.09    7.38
   1   3   4  340.61    7.15
   1  -3   4  334.17    7.65
   1  -3   5  199.60    5.26
   1   3   5  211.80    5.87
  -1   3  -5  208.53    5.94
   1  -3   5  198.30    5.50
   1   3   6   43.34    2.49
  -1   3  -6   40.61    2.47
  -1   3  -7  251.87    7.54
   1   3   7  246.49    6.43
   1   3   7  252.10    6.51
   1   3   7  262.84    6.67
   1   3   7  258.78    7.62
   1  -3   7  256.98    6.70
   1   3   7  265.33    6.51
   1   3   7  233.90    6.16
   1  -3   7  242.85    6.26
   1  -3   8    0.78    0.67
   1  -3   8    0.51    0.70
   1  -3   8    1.22    0.82
   1   3   8    1.17    0.73
   1   3   8    1.21    0.69
  -1   3  -8    0.14    0.80
   1   3   8    0.65    0.63
   1  -3   8    0.86    0.60
   1   3   8    0.84    0.80
   1   3   8    0.63    0.76
   1  -3   9   33.61    2.11
   1   3   9   35.75    2.24
   1   3   9   30.91    2.22
   1   3   9   31.30    2.20
   1  -3   9   31.25    2.26
  -1  -3  -9   35.25    2.81
   1  -3   9   31.03    2.09
   1  -3   9   31.46    2.18
   1   3   9   32.85    2.08
  -1   3  -9   34.80    2.65
   1   3   9   32.82    1.87
   1  -3  10  192.43    5.90
   1  -3  10  186.67    5.87
   1   3  10  184.81    5.37
   1   3  10  188.01    5.99
   1  -3  10  196.93    6.30
   1   3  10  186.51    5.99
   1  -3  10  193.45    6.13
   1   3  10  192.64    6.17
   1   3  10  191.61    5.78
  -1  -3 -10  176.74    6.90
   1   3  11    5.77    1.02
   1   3  11    4.37    0.93
   1  -3  11    6.32    1.28
   1  -3  11    6.28    1.19
   1  -3  11    4.71    1.02
  -1   3 -11    5.96    1.55
   1  -3  11    3.32    0.88
   1   3  11    5.25    1.23
   1  -3  12   29.81    2.03
   1  -3  12   33.41    2.21
   1  -3  12   30.84    1.91
   1   3  12   31.77    1.73
   1   3  12   30.26    2.18
   1  -3  12   32.43    2.29
   1  -3  13   26.50    1.78
   1  -3  13   27.30    1.83
   1   3  13   24.76    1.77
   1  -3  14    2.39    0.64
   1   3  14    2.39    0.65
   1  -3  14    2.82    0.67
  -1   4  15    6.14    0.64
  -1  -4  15    2.39    0.43
  -1   4  14    9.04    1.01
  -1   4  14    9.58    1.04
  -1  -4  14   10.53    1.08
  -1  -4  13    0.54    0.66
  -1   4  13   -0.18    0.80
  -1   4  13   -0.08    0.83
  -1  -4  13    0.97    0.85
  -1   4  13   -0.33    0.70
  -1   4  12    6.74    1.11
  -1  -4  12    7.69    1.34
  -1  -4  12    7.55    1.20
  -1   4  12    6.48    1.32
  -1   4  12    6.15    1.11
  -1   4  12    5.85    0.97
  -1   4  12    6.67    1.28
  -1  -4  12    6.93    1.19
  -1  -4  11    1.98    0.90
  -1  -4  11    1.77    0.94
  -1  -4  11    1.15    0.99
   1   4 -11    0.86    1.08
  -1   4  11    1.42    0.77
  -1   4  11    1.37    0.79
   1  -4 -11    1.69    1.13
  -1   4  11    2.75    1.14
  -1   4  11    1.26    0.99
  -1   4  11    1.32    0.78
   1   4 -10   13.39    2.05
  -1   4  10   11.91    1.38
  -1   4  10   14.01    1.46
  -1   4  10   13.10    1.37
  -1  -4  10   13.76    1.51
  -1   4  10   13.33    1.58
  -1  -4  10   12.08    1.33
  -1   4  10   12.07    1.57
  -1  -4  10   11.48    1.52
   1  -4 -10    9.22    1.85
  -1   4   9   11.77    1.49
   1   4  -9    9.50    1.70
  -1   4   9    9.53    1.52
  -1   4   9   11.84    1.23
  -1  -4   9   11.93    1.33
  -1   4   9   12.37    1.29
  -1  -4   9   12.22    1.27
  -1  -4   9   10.38    1.37
  -1   4   9   11.61    1.27
  -1   4   9    9.99    1.35
  -1   4   9   11.33    1.18
  -1  -4   8   97.09    3.37
  -1  -4   8   97.15    3.75
  -1   4   8  101.48    3.85
  -1   4   8  102.72    3.76
  -1   4   8  101.31    3.40
  -1  -4   8   97.41    3.48
  -1   4   8   96.62    3.33
  -1   4   8   95.26    4.37
   1   4  -8   90.65    4.69
  -1   4   8  100.75    3.47
  -1   4   8   99.46    3.32
  -1   4   7   24.03    1.43
  -1   4   7   23.88    1.65
  -1   4   7   26.48    2.11
  -1  -4   7   26.82    1.61
  -1   4   7   24.22    1.61
   1   4  -6    5.41    0.68
  -1   4   6    4.73    1.00
   1   4  -5  278.02    7.52
   1   4  -5  286.34    6.27
  -1   4   5  268.40    7.38
   1   4  -5  280.74    6.29
   1   4  -4  411.33    8.40
   1   4  -4  402.04    8.21
  -1   4   4  403.73    9.33
  -1  -4   4  388.47    8.99
   1   4  -3  304.90    6.44
  -1  -4   3  305.15    7.13
   1   4  -3  307.29    6.71
  -1   4   3  301.18    7.27
  -1  -4   3  314.83    7.30
  -1  -4   3  299.02    6.37
  -1   4   3  303.07    6.70
   1  -4  -3  295.10    6.84
  -1   4   2  343.30    7.77
   1  -4  -2  334.48    7.20
  -1   4   2  350.25    7.81
   1   4  -2  355.89    7.43
  -1  -4   2  336.21    6.79
  -1   4   2  348.33    7.36
   1   4  -2  339.80    7.14
  -1  -4   2  357.29    7.75
  -1   4   2  339.61    7.31
  -1  -4   2  334.22    7.63
  -1   4   1  736.34   14.09
   1  -4  -1  744.19   13.75
  -1   4   1  715.14   14.37
  -1  -4   1  736.79   14.38
  -1  -4   1  690.95   13.48
  -1   4   1  739.88   13.85
  -1   4   1  714.06   14.02
  -1   4   0 1754.82   33.35
  -1   4   0 1832.17   33.03
   1   4   0 1784.15   32.62
   1  -4   0 1831.13   33.33
   1  -4   0 1869.79   32.92
   1   4   1 1678.87   30.80
  -1   4  -1 1700.07   30.58
   1  -4   1 1665.93   29.49
   1  -4   1 1633.78   30.46
  -1   4  -1 1676.94   30.87
  -1   4  -1 1708.55   30.53
   1   4   2    6.53    0.76
  -1  -4  -2    6.59    0.84
   1  -4   2    6.20    0.80
  -1   4  -2    6.50    0.65
  -1   4  -2    7.59    0.82
   1  -4   2    7.15    0.84
  -1   4  -2    6.81    0.86
   1  -4   2    7.25    0.45
   1   4   2    6.75    0.74
  -1   4  -3  752.40   14.11
   1  -4   3  726.19   13.52
   1   4   3  723.71   14.14
   1  -4   3  760.35   13.98
  -1  -4  -3  744.28   15.47
   1   4   3  742.24   14.61
   1  -4   3  742.19   15.19
   1  -4   3  730.39   14.62
   1   4   3  723.81   14.83
   1  -4   4  201.22    5.31
   1   4   4  203.78    4.83
   1   4   4  204.57    5.08
  -1   4  -4  218.36    5.82
  -1  -4  -4  199.63    6.02
   1   4   4  213.94    5.64
   1  -4   4  201.94    5.81
   1  -4   5  280.81    6.99
   1   4   5  280.80    7.38
  -1   4  -5  286.41    7.51
   1  -4   5  279.91    7.68
   1   4   6  182.13    5.79
  -1   4  -6  174.84    5.77
   1   4   7    8.84    1.14
  -1   4  -7    9.07    1.35
   1   4   7    7.66    1.25
   1  -4   7    7.42    1.10
   1   4   7    7.07    1.05
   1   4   7    6.08    0.98
   1  -4   7    9.74    1.03
   1  -4   7    8.19    0.98
   1   4   7    8.15    1.00
   1  -4   7    8.96    1.01
  -1  -4  -8   72.05    4.42
   1   4   8   72.39    3.10
  -1   4  -8   68.81    3.68
   1   4   8   70.63    2.75
   1   4   8   72.06    3.18
   1  -4   8   71.62    3.26
   1   4   8   73.25    3.04
   1   4   8   69.66    3.09
   1  -4   8   68.52    2.90
   1  -4   8   71.79    2.96
   1  -4   9  313.50    8.17
   1   4   9  323.47    8.58
   1  -4   9  318.62    8.38
  -1   4  -9  300.81    9.28
   1   4   9  327.17    8.42
   1   4   9  318.40    7.82
   1  -4   9  325.41    8.71
   1   4   9  329.04    8.49
   1  -4   9  317.24    8.47
   1   4   9  319.01    8.23
  -1  -4  -9  307.71    9.82
  -1   4 -10   37.35    3.41
   1   4  10   42.51    2.68
   1  -4  10   45.42    2.68
   1  -4  10   38.57    2.40
   1   4  10   39.53    2.28
   1   4  10   44.49    2.65
   1  -4  10   43.34    2.76
   1   4  10   38.57    2.33
  -1  -4 -10   42.56    3.14
   1  -4  10   43.77    2.50
   1   4  11   43.76    2.61
   1  -4  11   47.06    2.77
   1  -4  11   46.89    2.57
   1   4  11   45.97    2.76
   1  -4  11   45.07    2.79
  -1   4 -11   41.85    3.57
   1   4  11   47.25    2.35
   1  -4  11   44.75    2.54
   1  -4  12   37.85    2.21
   1   4  12   40.34    2.42
   1   4  12   41.38    2.03
   1  -4  12   39.93    2.17
   1  -4  12   42.68    2.49
   1  -4  12   44.40    2.62
   1   4  12   41.54    2.50
   1  -4  13    0.55    0.66
   1   4  13    1.10    0.59
   1  -4  13    1.95    0.76
   1   4  13    1.14    0.73
   1   4  13    0.64    0.75
   1  -4  14    0.54    0.52
   1  -4  14    1.10    0.54
   1   4  14    1.37    0.57
   1   4  14    1.17    0.59
  -1  -5  14    6.46    0.78
  -1   5  14    5.77    0.83
  -1   5  14    5.97    0.85
  -1  -5  14    4.59    0.82
  -1  -5  13    4.56    0.89
  -1  -5  13    2.97    0.88
  -1   5  13    2.27    0.92
  -1   5  13    2.27    0.87
  -1  -5  13    3.38    0.81
  -1   5  13    2.06    0.70
  -1   5  12    5.14    1.18
  -1  -5  12    4.19    1.12
  -1   5  12    3.38    0.88
  -1  -5  12    4.92    1.00
  -1   5  12    4.37    1.12
  -1  -5  12    4.76    1.01
  -1  -5  12    4.40    0.97
  -1   5  11    2.77    1.14
   1  -5 -11    2.69    1.22
  -1   5  11    2.86    1.04
  -1   5  11    3.21    0.88
  -1   5  11    2.27    0.86
  -1  -5  11    2.18    1.06
  -1   5  11    2.48    0.77
  -1   5  11    1.73    0.79
  -1  -5  11    2.71    0.94
   1   5 -11    2.17    1.19
  -1  -5  11    3.40    0.96
  -1  -5  11    2.74    0.86
  -1   5  10  155.21    5.40
  -1  -5  10  151.15    5.00
  -1  -5  10  155.99    5.46
  -1   5  10  155.85    4.74
   1   5 -10  149.88    6.91
   1  -5 -10  146.72    6.71
  -1   5  10  153.93    5.00
  -1   5  10  161.05    5.54
  -1   5  10  150.39    4.76
  -1  -5  10  159.92    4.95
  -1   5  10  151.11    4.90
  -1  -5  10  162.36    5.20
  -1  -5   9   80.22    3.28
  -1   5   9   80.47    3.07
  -1   5   9   69.15    3.36
  -1  -5   9   78.90    3.32
   1   5  -9   76.33    4.62
  -1  -5   9   80.71    3.63
  -1   5   9   73.03    3.96
  -1   5   9   78.13    3.09
  -1   5   9   79.89    3.62
  -1   5   9   84.84    3.30
  -1  -5   9   83.48    3.19
   1  -5  -9   72.87    4.40
  -1   5   9   74.60    3.14
  -1   5   8   30.60    1.80
  -1   5   8   35.33    1.82
   1  -5  -8   29.35    2.58
   1   5  -8   25.99    2.59
  -1  -5   8   31.56    1.91
  -1  -5   8   30.36    1.75
  -1   5   8   29.59    2.07
  -1  -5   8   27.12    1.95
  -1   5   8   32.22    1.84
  -1   5   8   30.67    2.04
  -1  -5   8   28.25    1.80
  -1   5   8   27.43    2.31
  -1  -5   8   29.66    1.69
  -1   5   8   29.63    1.81
  -1   5   7    2.75    0.80
  -1  -5   7    2.37    0.70
   1  -5  -7    2.33    0.93
  -1   5   7    3.56    0.98
  -1   5   7    3.21    0.83
  -1   5   7    3.29    0.80
   1   5  -7    5.75    1.29
  -1   5   7    4.40    0.78
  -1   5   6  146.81    5.18
   1   5  -6  137.27    5.24
   1   5  -6  141.84    4.06
   1  -5  -6  144.61    5.16
  -1  -5   5 1017.20   20.93
   1  -5  -5 1052.28   21.26
   1   5  -5 1041.63   20.03
  -1   5   5 1044.91   21.44
   1   5  -5 1040.83   19.96
  -1   5   4 1176.13   23.35
  -1  -5   4 1182.31   23.02
   1   5  -4 1170.02   22.14
   1   5  -4 1153.74   22.26
   1  -5  -4 1165.21   22.94
  -1  -5   3  724.77   14.80
   1  -5  -3  690.09   14.25
  -1  -5   3  698.99   14.53
  -1  -5   3  703.12   13.64
   1   5  -3  714.38   13.87
  -1   5   3  687.52   14.77
   1   5  -3  703.62   14.05
   1   5  -2   37.21    1.59
  -1  -5   2   32.52    1.78
  -1   5   2   35.59    1.67
   1  -5  -2   36.20    1.86
  -1  -5   2   38.80    1.90
  -1   5   2   33.63    1.83
  -1   5   2   34.59    1.86
   1  -5  -2   37.03    1.62
   1   5  -2   34.10    1.65
  -1   5   2   35.69    1.67
  -1  -5   2   34.52    1.33
  -1  -5   1   48.39    1.71
  -1   5   1   52.60    1.94
  -1  -5   1   47.21    2.12
  -1   5   1   49.97    2.02
  -1   5   1   52.10    1.99
  -1   5   1   50.21    2.18
   1  -5  -1   48.00    1.82
   1  -5  -1   53.21    2.20
   1   5   0  438.04    9.26
   1  -5   0  441.13    9.14
   1  -5   0  445.79    9.51
  -1  -5   0  420.56    9.47
  -1   5   0  442.33    9.24
   1  -5   0  417.52    8.82
  -1  -5   0  430.26    8.70
   1   5   0  423.38    8.53
  -1   5   0  427.59    9.42
  -1   5   0  428.75    8.95
   1  -5   1 1283.88   23.74
   1   5   1 1254.89   24.06
  -1  -5  -1 1285.72   24.41
   1  -5   1 1232.00   23.87
  -1   5  -1 1278.86   24.11
  -1   5  -1 1279.86   23.73
  -1   5  -1 1243.04   23.85
   1  -5   1 1246.45   24.31
  -1  -5  -2 1146.46   22.56
   1   5   2 1164.12   21.83
   1  -5   2 1151.67   21.84
   1   5   2 1069.00   22.43
  -1   5  -2 1158.90   21.61
   1   5   2 1151.83   22.06
  -1   5  -2 1141.27   22.04
   1  -5   2 1152.49   22.35
   1   5   3   30.83    1.47
  -1   5  -3   30.15    1.80
  -1  -5  -3   33.76    2.07
   1  -5   3   31.70    1.89
   1  -5   3   31.59    1.18
   1   5   3   33.21    1.75
   1  -5   3   30.94    1.60
   1   5   3   31.12    1.66
   1   5   4    4.42    0.64
   1   5   4    5.35    0.87
  -1  -5  -4    3.62    0.96
   1  -5   4    5.18    0.80
   1   5   4    5.14    0.74
   1  -5   4    3.83    0.85
  -1  -5  -5    3.09    0.97
   1  -5   5    2.20    0.79
  -1   5  -5    3.00    0.82
   1  -5   5    3.37    0.70
   1   5   5    3.36    0.80
   1   5   6  227.61    6.83
  -1   5  -6  233.12    6.93
  -1  -5  -6  217.78    7.49
   1   5   7   87.90    3.42
  -1   5  -7   95.69    4.18
   1   5   7   87.73    3.32
   1  -5   7   84.74    3.05
   1   5   7   85.98    3.25
   1   5   7   88.05    3.33
   1  -5   7   86.68    3.24
   1  -5   7   79.95    3.03
   1   5   7   87.75    3.04
   1   5   7   92.38    4.14
   1  -5   8    3.67    0.82
   1  -5   8    1.93    0.74
   1   5   8    2.49    0.83
   1   5   8    3.32    0.94
   1   5   8    2.21    0.93
   1   5   8    3.84    0.95
   1   5   8    3.23    0.81
   1  -5   8    2.42    0.97
  -1   5  -8    1.95    0.95
   1  -5   9   39.25    2.27
   1   5   9   41.53    2.22
   1  -5   9   41.36    2.34
   1  -5   9   37.39    2.53
  -1   5  -9   38.46    2.81
   1   5   9   38.57    2.50
   1  -5   9   44.75    2.60
  -1   5  -9   42.88    3.51
   1   5   9   39.85    2.48
   1   5   9   44.44    2.45
   1  -5  10   25.10    2.16
  -1  -5 -10   27.93    2.59
   1   5  10   30.11    2.29
   1  -5  10   25.32    1.90
   1   5  10   24.22    1.84
   1  -5  10   26.24    2.01
   1   5  10   29.08    2.18
  -1   5 -10   28.44    2.94
   1  -5  10   30.42    2.28
   1   5  10   32.20    1.91
   1   5  11    4.27    0.96
  -1   5 -11    2.39    1.19
   1  -5  11    3.88    1.09
  -1  -5 -11    2.61    1.30
   1  -5  11    5.12    1.25
   1  -5  11    3.25    0.95
   1   5  11    3.41    1.09
   1   5  11    5.98    1.27
   1  -5  11    3.35    0.94
   1  -5  12   37.81    2.10
   1   5  12   38.51    2.35
   1   5  12   43.94    2.43
   1  -5  12   43.98    2.58
   1  -5  12   44.85    2.46
   1  -5  12   37.38    2.12
   1   5  12   42.24    2.06
   1  -5  13   15.58    1.29
   1  -5  13   17.20    1.44
   1   5  13   14.12    1.04
   1   5  13   12.62    1.25
   1   5  13   15.77    1.36
   1  -5  14    4.76    0.68
   1   5  14    4.70    0.70
   1  -5  14    5.44    0.69
  -1  -6  14   19.94    1.30
  -1  -6  14   18.07    1.13
  -1   6  14   16.55    0.93
  -1   6  14   18.98    1.25
  -1  -6  13    1.29    0.73
  -1   6  13    0.82    0.76
  -1   6  13    1.75    0.81
  -1   6  13    1.10    0.67
  -1  -6  13    2.51    0.72
  -1   6  12   17.97    1.74
  -1  -6  12   17.30    1.57
  -1  -6  12   16.08    1.44
  -1  -6  12   14.36    1.62
  -1   6  12   17.15    1.46
  -1   6  12   16.38    1.70
  -1  -6  11   44.93    2.49
   1   6 -11   48.30    3.81
  -1   6  11   50.32    2.37
  -1  -6  11   47.34    2.43
  -1   6  11   46.52    2.30
  -1  -6  11   47.68    2.84
  -1  -6  11   46.00    2.57
  -1   6  11   45.74    2.78
  -1   6  11   46.23    2.42
   1  -6 -11   39.10    3.30
  -1   6  11   47.24    2.84
   1  -6 -10    3.67    1.26
  -1   6  10    1.40    1.02
  -1  -6  10    1.50    0.89
  -1  -6  10    2.37    0.84
   1   6 -10    2.85    1.31
  -1  -6  10    1.62    1.04
  -1   6  10    2.39    0.90
  -1   6  10    2.54    1.11
  -1   6  10    1.92    0.88
  -1  -6  10    1.43    0.81
  -1   6  10    2.74    1.08
  -1   6  10    1.84    0.81
  -1   6   9  424.98    9.91
  -1   6   9  406.60    9.89
   1   6  -9  413.22   12.70
  -1   6   9  427.70   10.51
  -1  -6   9  419.48   10.60
  -1   6   9  424.14    9.89
   1  -6  -9  403.29   12.30
  -1  -6   9  426.63    9.76
  -1  -6   9  418.72   10.00
  -1  -6   9  420.84   10.14
  -1   6   9  444.25   10.75
  -1   6   9  428.30    9.65
  -1   6   8  139.80    4.44
  -1   6   8  142.17    5.70
  -1  -6   8  146.41    4.93
  -1  -6   8  148.10    4.34
   1   6  -8  140.93    6.23
  -1  -6   8  143.99    4.57
   1  -6  -8  139.73    5.97
  -1   6   8  145.03    4.40
  -1   6   8  145.50    4.49
  -1   6   8  144.63    4.86
  -1  -6   8  136.17    4.30
  -1   6   8  145.65    4.94
   1  -6  -7   27.80    2.34
  -1   6   7   22.96    1.73
  -1  -6   7   23.85    1.50
  -1   6   7   21.82    1.54
  -1  -6   7   27.60    1.51
  -1  -6   7   23.75    1.49
  -1   6   7   21.68    1.66
  -1   6   7   25.16    2.17
  -1  -6   7   22.76    1.54
  -1   6   7   22.02    1.52
   1   6  -6   89.18    3.12
   1  -6  -6   84.65    3.88
  -1   6   6   86.03    4.00
   1   6  -5   56.25    2.34
   1  -6  -5   62.04    2.99
   1   6  -5   58.25    2.33
  -1  -6   5   59.92    2.85
  -1   6   5   58.38    3.05
   1   6  -4  261.61    6.34
  -1  -6   4  252.89    6.12
   1  -6  -4  251.13    6.75
   1   6  -4  261.30    6.25
  -1   6   4  259.49    7.19
  -1  -6   4  250.88    6.79
  -1  -6   3  696.44   14.55
   1   6  -3  667.53   13.73
   1  -6  -3  684.56   13.97
   1   6  -3  675.07   13.61
  -1   6   3  632.21   14.37
  -1  -6   3  660.29   13.26
  -1   6   3  681.98   14.52
  -1  -6   3  671.08   14.21
   1   6  -2    3.18    0.66
   1  -6  -2    4.09    0.79
  -1  -6   2    3.71    0.81
  -1   6   2    3.56    0.81
  -1  -6   2    3.66    0.57
  -1  -6   2    3.26    0.77
   1  -6  -2    4.18    0.72
  -1   6   2    3.92    0.70
   1   6  -2    3.56    0.72
  -1   6   2    5.30    0.92
  -1   6   1  466.03   10.13
  -1  -6   1  454.90    9.73
   1  -6  -1  475.27   10.50
  -1   6   1  471.37   10.33
   1  -6  -1  491.83    9.99
  -1   6   1  474.42   10.08
   1   6  -1  479.85    9.66
  -1  -6   1  477.48   10.57
   1   6   0   32.31    1.73
  -1   6   0   32.50    1.63
   1  -6   0   27.11    1.52
  -1   6   0   30.89    1.74
  -1  -6   0   32.31    1.86
  -1  -6   0   30.14    1.45
   1   6   0   29.80    1.35
   1  -6   0   28.97    1.82
   1  -6   0   32.17    1.54
   1   6   1 1169.48   23.12
   1  -6   1 1174.32   23.16
  -1  -6  -1 1181.53   23.21
  -1   6  -1 1168.92   22.82
  -1   6  -1 1216.07   22.70
   1   6   1 1169.17   22.18
   1   6   1 1181.19   22.86
  -1   6  -1 1162.30   22.45
   1  -6   1 1140.46   22.46
   1  -6   1 1185.04   22.59
   1   6   2  327.70    7.53
   1  -6   2  333.74    8.12
   1   6   2  335.06    7.96
  -1  -6  -2  340.75    8.38
  -1   6  -2  339.12    7.95
   1  -6   2  334.92    7.64
   1   6   2  333.30    8.34
   1  -6   3 1058.12   19.88
   1  -6   3 1077.54   21.45
   1   6   3 1065.86   21.74
   1  -6   3 1084.43   20.64
  -1   6  -3 1063.45   21.25
   1   6   3 1062.09   20.78
   1   6   3 1039.68   20.91
   1   6   3 1025.93   20.52
  -1  -6  -3 1061.08   21.71
   1   6   4   64.04    2.51
   1   6   4   69.53    2.90
  -1  -6  -4   67.34    3.37
  -1   6  -4   73.15    3.23
  -1   6  -4   75.02    3.18
   1  -6   4   67.17    3.14
   1   6   4   68.31    2.79
   1  -6   4   65.85    2.65
  -1  -6  -5    2.69    0.95
   1  -6   5    4.21    0.97
   1  -6   5    3.62    0.73
  -1   6  -5    2.67    0.86
  -1   6  -5    3.24    0.94
   1   6   5    4.66    0.94
   1  -6   6  169.32    4.85
  -1   6  -6  163.07    6.08
  -1   6  -6  172.34    5.80
   1   6   6  172.66    5.75
   1  -6   6  164.26    5.07
   1  -6   7   75.90    2.87
   1   6   7   78.58    3.87
  -1   6  -7   70.06    4.03
   1  -6   7   73.02    3.04
   1   6   7   71.74    2.79
   1   6   7   81.47    3.17
   1   6   7   76.68    2.87
   1   6   7   73.45    3.21
   1   6   7   75.96    3.06
  -1   6  -7   76.93    3.81
  -1   6  -8   27.70    2.74
   1  -6   8   28.20    2.09
   1   6   8   26.03    1.78
   1   6   8   27.51    1.95
   1  -6   8   27.09    1.86
  -1   6  -8   27.01    2.31
   1   6   8   26.15    1.64
   1   6   8   29.45    1.93
   1  -6   8   23.54    1.68
   1   6   8   23.96    1.95
   1  -6   9    7.56    1.13
   1  -6   9    6.18    1.09
  -1   6  -9    5.71    1.57
   1   6   9    7.19    1.29
   1   6   9    5.88    1.08
  -1   6  -9    6.04    1.28
   1  -6   9    6.55    1.30
   1   6   9    7.61    1.36
   1   6  10   13.79    1.53
   1   6  10   13.00    1.66
   1  -6  10   14.24    1.67
   1   6  10   13.06    1.34
  -1  -6 -10   11.10    1.73
  -1   6 -10   11.52    2.05
   1  -6  10   11.01    1.57
   1  -6  10   13.92    1.46
   1  -6  10   13.19    1.53
   1   6  10   12.28    1.33
  -1  -6 -10   10.39    1.99
   1  -6  11    0.93    0.71
   1   6  11    2.30    0.78
  -1   6 -11    2.35    1.22
   1  -6  11    1.99    0.78
   1   6  11    2.68    0.84
   1   6  11    2.24    1.02
  -1  -6 -11    0.92    1.01
   1  -6  11    1.68    0.98
   1  -6  11    3.18    1.00
   1   6  11    2.87    1.08
   1  -6  12    0.42    0.64
   1   6  12    0.75    0.81
   1   6  12    0.72    0.80
   1  -6  12    1.27    0.74
   1   6  12    0.90    0.71
   1  -6  12    0.59    0.61
   1  -6  12    0.66    0.79
   1  -6  13    1.18    0.68
   1   6  13    0.20    0.63
   1   6  13   -0.37    0.68
   1   6  13    0.23    0.54
   1  -6  13    0.25    0.66
   1   6  14    0.43    0.45
   1  -6  14    0.44    0.42
   1  -6  14    0.04    0.41
  -1   7  14    0.64    0.45
  -1  -7  14    0.22    0.40
  -1  -7  14    0.09    0.46
  -1  -7  13    3.16    0.73
  -1  -7  13    3.30    0.89
  -1   7  13    3.64    0.93
  -1   7  13    1.91    0.70
  -1   7  13    5.65    1.02
  -1  -7  12   77.61    2.95
  -1   7  12   75.08    2.96
  -1  -7  12   81.27    3.51
  -1  -7  12   75.95    3.11
  -1   7  12   79.83    3.47
  -1   7  12   74.15    2.75
  -1   7  12   80.45    3.43
  -1   7  11   25.30    1.74
  -1   7  11   24.75    2.13
   1   7 -11   23.93    2.77
  -1  -7  11   22.73    1.62
  -1  -7  11   24.41    1.75
  -1   7  11   22.53    2.06
  -1  -7  11   26.00    1.90
  -1  -7  11   23.28    2.05
  -1   7  11   23.77    1.76
  -1  -7  10    0.35    0.88
   1   7 -10    1.34    1.15
  -1   7  10    0.44    1.00
  -1   7  10   -0.50    0.82
  -1   7  10    0.35    0.83
   1  -7 -10    1.19    0.97
  -1  -7  10    0.56    0.81
  -1  -7  10    0.15    0.72
  -1  -7  10    0.09    0.73
  -1   7  10    0.58    0.95
  -1  -7   9  195.09    5.72
  -1  -7   9  197.83    5.85
  -1  -7   9  203.44    6.39
  -1  -7   9  200.99    5.59
  -1   7   9  202.76    6.37
  -1   7   9  187.37    5.72
  -1   7   9  206.75    6.30
   1  -7  -9  183.00    7.46
  -1   7   9  199.26    5.64
  -1  -7   9  197.12    5.46
   1   7  -9  188.07    7.86
  -1   7   9  187.84    5.70
  -1  -7   8  190.23    5.60
  -1  -7   8  198.58    5.52
  -1   7   8  186.86    6.89
   1  -7  -8  188.86    7.30
  -1   7   8  190.11    5.55
  -1  -7   8  195.57    5.55
  -1   7   8  183.98    5.47
  -1   7   8  204.45    6.04
  -1  -7   8  195.62    5.24
  -1   7   8  204.74    6.17
  -1  -7   7    0.54    0.46
  -1   7   7    0.36    0.77
   1  -7  -7    0.30    0.74
  -1  -7   7    0.07    0.51
  -1  -7   7    0.07    0.50
  -1   7   7   -0.07    0.71
  -1  -7   7    0.28    0.63
  -1   7   7    0.07    0.73
  -1   7   7    0.15    0.66
  -1   7   7   -0.34    0.84
   1  -7  -6  282.15    8.30
  -1   7   6  271.08    6.77
  -1   7   6  289.45    8.44
  -1  -7   6  274.64    6.70
   1   7  -6  287.35    7.11
  -1   7   6  280.81    7.20
  -1   7   6  257.71    6.90
   1   7  -5  110.43    3.69
  -1  -7   5  112.19    4.27
   1  -7  -5  122.59    4.53
  -1   7   5  114.34    4.66
   1   7  -5  123.32    3.92
  -1  -7   4    3.96    0.89
  -1   7   4    5.55    1.09
  -1  -7   4    6.40    0.82
   1   7  -4    6.84    0.90
   1   7  -4    4.62    0.78
   1  -7  -4    5.63    0.93
  -1   7   3    2.51    0.74
  -1  -7   3    2.64    0.84
   1  -7  -3    3.27    0.85
   1   7  -3    2.73    0.69
  -1  -7   3    1.62    0.53
   1   7  -3    4.93    0.81
   1  -7  -3    4.26    0.87
  -1  -7   3    2.14    0.75
  -1   7   3    3.09    0.90
   1  -7  -2  276.37    6.73
   1  -7  -2  279.47    7.24
  -1  -7   2  273.99    7.07
  -1  -7   2  272.51    6.25
  -1   7   2  273.37    7.29
  -1   7   2  270.97    6.86
  -1  -7   2  282.44    7.27
   1   7  -2  261.59    6.76
  -1   7   1 1384.49   26.32
   1   7  -1 1356.72   26.84
  -1  -7   1 1326.29   24.81
  -1  -7   1 1398.94   26.87
  -1   7   1 1431.48   26.61
   1  -7  -1 1382.25   26.14
  -1  -7   1 1293.86   25.83
   1  -7  -1 1399.69   26.86
   1   7  -1 1396.83   25.76
   1  -7  -1 1413.41   26.38
  -1  -7   0    9.94    1.23
   1  -7   0   10.23    1.00
  -1  -7   0   12.54    1.04
   1   7   0   11.75    1.27
  -1   7   0    9.94    1.07
  -1   7   0   11.96    1.19
   1  -7   0   12.96    1.14
   1  -7   0   12.04    1.36
   1   7   0   12.07    1.20
   1   7   1  193.06    5.74
   1   7   1  194.57    4.84
  -1   7  -1  197.66    5.53
  -1  -7  -1  195.09    5.80
   1   7   1  190.13    4.97
   1   7   1  198.42    5.56
   1  -7   1  198.80    5.79
   1  -7   1  197.82    5.27
   1  -7   1  183.59    5.16
  -1   7  -1  192.04    5.34
  -1  -7  -1  198.30    5.20
  -1   7  -2  285.66    7.30
   1  -7   2  297.86    6.96
   1   7   2  288.19    7.29
  -1  -7  -2  278.81    7.65
   1   7   2  283.47    7.70
   1   7   2  280.15    6.69
   1  -7   2  264.80    7.31
   1   7   3 1021.63   20.08
   1  -7   3 1004.02   19.93
   1  -7   3 1015.00   19.37
   1   7   3 1026.57   21.29
  -1   7  -3 1032.15   20.77
   1   7   3 1020.70   20.48
   1  -7   3 1011.61   20.83
   1   7   3 1012.35   20.09
  -1  -7  -3  933.14   21.00
   1   7   4   78.27    3.23
   1  -7   4   82.62    3.04
  -1   7  -4   80.42    3.60
  -1   7  -4   79.99    3.47
   1  -7   4   79.93    3.61
   1   7   4   79.84    3.05
   1   7   4   82.72    3.28
   1  -7   5  434.12   10.00
  -1   7  -5  444.25   11.35
   1  -7   5  445.81   11.27
  -1   7  -5  445.38   11.00
   1   7   5  428.13   10.59
  -1   7  -6  139.76    5.76
   1   7   6  151.91    4.38
   1  -7   6  152.56    4.64
  -1   7  -6  143.67    5.42
   1   7   6  146.70    4.74
   1   7   6  150.99    5.38
   1   7   6  155.85    4.57
   1  -7   6  153.06    5.78
   1   7   7    7.10    1.18
   1  -7   7    6.83    0.93
   1  -7   7    8.21    1.09
  -1   7  -7    7.07    1.31
   1   7   7    7.63    1.04
   1   7   7    7.76    1.13
  -1   7  -7    8.67    1.61
   1   7   7    7.91    0.98
   1   7   7    6.36    1.23
   1   7   8  180.03    5.62
   1   7   8  173.14    5.11
   1   7   8  176.66    5.24
   1  -7   8  175.28    5.59
   1   7   8  185.64    5.83
   1  -7   8  183.54    5.98
  -1   7  -8  181.95    6.58
   1  -7   8  177.52    5.16
  -1   7  -8  177.76    7.35
   1   7   9    0.08    0.76
   1  -7   9    0.41    0.67
   1  -7   9    0.85    0.67
  -1  -7  -9    0.47    1.09
  -1   7  -9    1.94    1.27
   1  -7   9    0.59    0.98
  -1   7  -9    1.04    0.83
   1   7   9    0.40    0.89
   1   7   9    0.65    0.81
   1   7   9    0.22    0.88
  -1  -7 -10   18.14    2.22
  -1  -7 -10   18.03    2.54
   1  -7  10   18.53    1.80
   1   7  10   20.09    1.61
  -1   7 -10   14.80    2.30
   1   7  10   17.19    1.50
   1   7  10   16.87    1.71
   1  -7  10   19.74    1.94
   1  -7  10   20.21    1.58
   1   7  10   21.49    1.94
   1  -7  10   16.25    1.66
   1  -7  11    1.34    0.96
   1  -7  11   -0.08    0.62
   1   7  11   -0.48    0.77
   1  -7  11    0.11    0.88
   1   7  11   -0.60    0.80
   1   7  11    0.51    0.87
   1   7  11   -0.56    1.00
   1  -7  11   -0.09    0.67
   1  -7  12   16.98    1.36
   1   7  12   16.18    1.46
   1  -7  12   15.21    1.22
   1   7  12   16.83    1.16
   1   7  12   18.39    1.35
   1   7  12   17.46    1.58
   1  -7  12   17.15    1.48
   1  -7  12   17.11    1.61
   1  -7  13    5.70    0.87
   1   7  13    4.63    0.85
   1  -7  13    5.64    0.84
   1   7  13    4.50    0.68
   1   7  14   10.38    0.74
   1  -7  14    8.69    0.70
   1  -7  14    8.39    0.59
  -1   8  14    3.25    0.49
  -1  -8  14    0.69    0.45
  -1  -8  13    1.47    0.57
  -1  -8  13    1.02    0.68
  -1   8  13    2.37    0.86
  -1   8  13    0.45    0.59
  -1   8  12    5.01    0.97
  -1   8  12    5.89    0.87
  -1   8  12    4.92    1.10
  -1  -8  12    4.72    1.07
  -1   8  12    5.95    1.21
  -1  -8  12    5.39    0.93
  -1  -8  11   20.70    1.66
  -1   8  11   20.73    1.87
  -1  -8  11   20.06    1.86
  -1   8  11   22.44    1.99
  -1   8  11   20.90    1.59
  -1   8  11   22.74    1.70
  -1  -8  10   95.73    3.75
   1  -8 -10   90.66    4.97
  -1  -8  10   92.90    4.11
  -1  -8  10   91.25    3.32
   1   8 -10   91.86    5.39
  -1   8  10   94.94    3.64
  -1   8  10   96.06    4.04
  -1   8  10   91.10    4.08
  -1  -8  10   97.19    3.47
  -1   8  10   95.80    3.68
  -1   8   9  114.84    4.51
   1   8  -9   97.46    5.63
  -1  -8   9  110.93    3.95
  -1   8   9  110.70    4.00
   1  -8  -9  103.51    5.33
  -1  -8   9  114.88    3.96
  -1   8   9  108.15    4.03
  -1  -8   9  111.72    3.70
  -1  -8   9  116.62    4.61
  -1   8   9  114.25    4.59
  -1  -8   9  111.98    4.08
  -1   8   8  225.26    6.86
  -1  -8   8  246.95    6.52
  -1  -8   8  238.19    6.01
  -1   8   8  245.16    8.20
  -1  -8   8  248.84    6.62
  -1   8   8  255.41    7.24
  -1   8   8  239.08    6.63
  -1  -8   8  240.27    6.53
  -1   8   8  226.23    6.41
   1  -8  -8  243.89    8.45
  -1  -8   7   33.97    1.98
  -1   8   7   33.11    2.23
  -1  -8   7   35.06    1.97
  -1   8   7   33.41    2.66
  -1   8   7   30.69    1.96
  -1  -8   7   35.99    1.98
   1  -8  -7   32.87    2.66
  -1   8   6   42.89    2.36
  -1  -8   6   46.19    2.14
   1   8  -6   47.53    2.42
  -1   8   6   44.87    2.19
  -1   8   6   44.97    2.09
  -1  -8   6   43.92    2.13
   1  -8  -6   45.94    2.96
  -1   8   6   40.82    2.91
   1  -8  -5    4.24    1.04
  -1   8   5    3.23    1.04
   1   8  -5    4.38    0.80
  -1  -8   5    3.34    0.88
   1   8  -5    4.38    0.85
   1   8  -4    2.33    0.72
  -1   8   4    0.86    0.74
   1  -8  -4    0.72    0.77
  -1  -8   4    0.42    0.65
  -1  -8   4    1.26    0.53
   1   8  -4    0.74    0.52
   1  -8  -4    0.51    0.60
   1   8  -3  838.03   19.02
   1   8  -3  884.47   18.18
  -1  -8   3  871.81   19.00
  -1  -8   3  856.10   17.57
  -1   8   3  904.66   18.66
  -1   8   3  901.76   19.16
   1  -8  -3  881.00   19.00
   1   8  -3  925.35   18.23
  -1  -8   3  880.71   18.77
   1  -8  -3  887.78   18.41
   1   8  -2  730.74   14.83
   1   8  -2  743.97   15.39
  -1  -8   2  711.13   15.61
  -1   8   2  731.16   15.99
  -1  -8   2  709.45   14.61
  -1  -8   2  731.19   15.85
   1  -8  -2  681.06   15.10
   1  -8  -2  729.11   15.82
   1   8  -2  715.22   15.94
  -1   8   2  727.02   15.44
  -1  -8   1  210.88    5.87
   1  -8  -1  238.85    6.23
   1  -8  -1  236.40    6.64
  -1  -8   1  229.09    6.60
   1   8  -1  222.78    6.29
   1  -8  -1  221.73    6.05
  -1   8   1  226.36    6.19
   1   8  -1  223.29    5.72
  -1   8   1  237.18    6.48
   1   8  -1  237.84    6.78
   1   8   0   14.58    1.41
  -1   8   0   17.23    1.51
   1  -8   0   15.38    1.32
  -1   8   0   15.40    1.35
   1   8   0   14.50    1.16
   1   8   0   14.58    0.99
   1  -8   0   16.28    1.35
  -1  -8   0   16.13    1.56
  -1  -8   0   15.87    1.24
   1  -8   0   15.18    1.65
   1   8   0   17.16    1.60
  -1   8  -1   20.12    1.56
   1  -8   1   17.92    1.57
   1   8   1   16.86    1.15
   1   8   1   16.31    1.60
  -1   8  -1   18.12    1.56
   1   8   1   17.77    1.53
  -1  -8  -1   18.16    1.40
  -1  -8  -1   16.53    1.65
   1  -8   1   17.72    1.42
   1  -8   1   19.73    1.84
   1   8   1   17.80    1.33
   1   8   2  346.08    8.77
  -1   8  -2  352.61    8.89
   1  -8   2  344.54    8.31
   1  -8   2  364.17    9.05
   1  -8   2  343.04    8.61
   1   8   2  347.28    8.00
   1   8   2  356.28    9.33
   1   8   3  330.04    9.39
   1   8   3  355.46    8.29
  -1   8  -3  350.71    9.09
   1  -8   3  342.86    9.04
   1  -8   3  349.43    8.20
   1   8   3  345.40    8.54
   1   8   3  348.17    8.78
  -1   8  -3  328.28    8.81
  -1   8  -4  136.05    5.07
   1  -8   4  120.96    4.88
  -1   8  -4  131.41    4.83
   1   8   4  133.22    4.62
   1  -8   4  136.42    4.22
   1   8   4  128.28    4.38
   1   8   4  124.43    4.31
   1   8   5   46.86    2.14
  -1   8  -5   48.09    2.88
  -1   8  -5   50.23    3.11
   1   8   5   45.19    2.58
   1  -8   5   50.45    3.05
   1  -8   5   41.51    2.16
   1   8   5   47.90    2.37
   1  -8   6  135.89    4.41
   1   8   6  130.14    5.00
  -1   8  -6  127.87    5.21
   1   8   6  137.84    3.98
   1  -8   6  141.11    5.60
   1   8   6  130.44    4.11
   1   8   6  123.69    4.18
   1   8   6  125.68    4.41
  -1   8  -6  134.37    5.70
   1  -8   7  361.90    8.87
  -1   8  -7  359.15   10.92
  -1   8  -7  360.85   10.12
   1   8   7  341.05    8.64
   1   8   7  329.03    9.68
   1   8   7  354.23    8.96
   1   8   7  340.85    8.36
   1   8   8   14.80    1.45
  -1   8  -8   18.38    2.39
  -1  -8  -8   18.69    2.47
   1  -8   8   16.93    1.62
  -1   8  -8   16.62    1.92
   1   8   8   14.93    1.58
   1   8   8   17.26    1.76
   1  -8   8   18.36    1.43
   1   8   8   16.00    1.43
   1   8   9    1.54    0.86
   1  -8   9    1.56    0.83
  -1   8  -9    0.45    0.69
   1   8   9    1.76    0.92
   1   8   9    0.59    0.92
  -1   8  -9    1.29    0.68
  -1  -8  -9    2.11    1.33
   1  -8   9    0.83    0.89
   1  -8   9    1.88    0.74
  -1   8  -9    1.53    1.22
   1   8   9    1.23    0.91
   1  -8  10    0.30    0.85
  -1   8 -10    1.53    1.25
   1   8  10    1.52    0.90
   1  -8  10   -0.12    0.90
  -1  -8 -10    0.70    1.05
   1  -8  10    0.69    0.62
   1   8  10    0.20    0.86
   1   8  10    1.59    0.83
   1   8  10    0.88    0.90
   1  -8  11   17.97    1.39
   1   8  11   17.99    1.64
   1   8  11   25.12    1.61
   1   8  11   21.20    1.56
   1   8  11   21.57    1.87
   1  -8  11   22.17    1.90
   1  -8  11   21.65    1.76
   1  -8  11   17.78    1.59
   1   8  12    0.28    0.81
   1  -8  12   -0.13    0.53
   1   8  12    0.12    0.66
   1   8  12    0.49    0.53
   1  -8  12   -0.14    0.65
   1  -8  12    1.00    0.78
   1  -8  13    2.19    0.66
   1  -8  13    2.86    0.65
   1   8  13    2.44    0.66
   1   8  13    3.39    0.61
  -1  -9  14    1.36    0.38
  -1   9  14    7.98    0.52
  -1  -9  13    0.21    0.43
  -1   9  13   -0.40    0.64
  -1  -9  13   -0.06    0.55
  -1  -9  12   16.35    1.29
  -1   9  12   18.48    1.29
  -1   9  12   15.07    1.29
  -1  -9  12   16.96    1.54
  -1   9  12   17.88    1.55
  -1   9  11    6.06    1.30
  -1  -9  11    5.54    0.98
  -1   9  11    6.88    1.05
  -1  -9  11    6.31    1.20
  -1   9  11    7.14    1.10
  -1   9  11    7.59    1.43
  -1  -9  10   89.14    3.98
  -1  -9  10   85.00    3.31
  -1  -9  10   85.43    3.45
  -1   9  10   87.85    3.48
  -1   9  10   90.12    3.51
   1  -9 -10   88.09    5.11
   1   9 -10   91.64    5.36
  -1   9  10   87.18    3.97
   1  -9  -9   -0.38    0.80
  -1  -9   9   -0.13    0.56
  -1   9   9   -0.23    0.95
   1  -9  -9   -0.21    0.99
  -1   9   9    0.78    0.95
  -1  -9   9    0.09    0.67
  -1  -9   9   -0.70    0.75
  -1  -9   9   -0.33    0.71
  -1  -9   9   -0.12    0.92
  -1   9   9   -0.36    0.81
  -1   9   8   29.53    2.27
  -1   9   8   29.95    2.64
   1  -9  -8   33.43    2.87
  -1  -9   8   30.86    1.95
  -1  -9   8   26.93    1.88
  -1   9   8   29.30    2.03
  -1  -9   8   26.30    1.86
  -1   9   7  213.19    7.74
  -1   9   7  222.70    6.62
  -1  -9   7  227.22    6.26
   1  -9  -7  218.17    7.67
  -1   9   7  212.41    6.05
  -1  -9   7  219.14    5.93
  -1  -9   7  217.34    6.07
  -1   9   7  215.35    5.93
  -1  -9   6   62.57    2.54
   1  -9  -6   56.99    3.43
  -1   9   6   58.18    2.46
  -1   9   6   60.57    3.66
  -1   9   6   63.36    2.69
  -1   9   6   58.62    2.99
  -1  -9   6   58.36    3.21
   1  -9  -6   59.64    3.76
  -1  -9   6   61.03    2.64
   1   9  -6   60.54    2.95
   1  -9  -5  476.95   12.38
  -1   9   5  459.22   10.59
  -1  -9   5  467.39   10.24
  -1  -9   5  455.00   11.64
   1  -9  -5  478.28   11.88
   1   9  -5  474.75   11.13
  -1   9   5  465.76   12.28
  -1   9   5  466.87   10.71
   1   9  -5  474.86   10.83
  -1   9   5  439.22    9.86
  -1   9   5  460.89   10.01
   1   9  -4  410.19    9.90
  -1   9   4  391.25   10.87
   1   9  -4  420.74   11.20
   1  -9  -4  422.14   10.49
  -1  -9   4  392.65   10.40
   1  -9  -4  416.79   11.02
   1   9  -4  396.95    9.89
  -1  -9   3    1.77    0.66
   1  -9  -3    1.86    0.89
  -1   9   3    3.48    1.03
  -1   9   3    4.16    1.10
   1   9  -3    1.43    0.91
  -1  -9   3    1.37    0.83
   1   9  -3    1.42    0.66
   1  -9  -3    1.93    0.75
  -1   9   3    3.43    0.93
  -1  -9   3    2.18    0.84
   1   9  -2   87.78    3.32
   1   9  -2   89.89    4.10
  -1  -9   2   90.45    3.91
  -1  -9   2   86.75    3.24
  -1   9   2   94.13    4.05
  -1   9   2   93.73    3.80
   1   9  -2   91.98    3.71
  -1  -9   2   96.61    4.08
   1  -9  -2   97.10    3.72
   1  -9  -2   91.88    4.02
  -1   9   2   95.23    4.14
  -1  -9   1   29.21    2.08
   1  -9  -1   27.03    1.84
  -1   9   1   25.69    2.04
   1  -9  -1   25.63    1.79
  -1   9   1   24.89    1.93
   1   9  -1   24.20    1.87
   1   9  -1   26.40    1.65
   1   9  -1   27.87    2.19
  -1  -9   1   23.41    1.97
  -1   9   1   25.20    1.86
   1  -9  -1   24.21    2.03
   1   9   0   19.21    1.14
   1   9   0   16.51    1.75
   1  -9   0   22.76    1.62
   1  -9   0   20.90    1.60
  -1   9   0   18.90    1.75
  -1   9   0   19.28    1.63
  -1   9   0   20.96    1.77
   1   9   0   19.58    1.41
  -1  -9   0   16.49    1.55
   1  -9   0   18.54    1.92
   1  -9   1  274.06    7.80
   1  -9   1  264.54    7.15
   1   9   1  270.67    7.88
   1  -9   1  250.88    6.89
  -1   9  -1  258.91    7.27
   1   9   1  264.90    6.28
   1   9   1  264.03    7.45
  -1   9  -1  266.86    7.64
  -1   9  -1  275.04    7.53
   1   9   1  273.89    6.92
  -1  -9  -1  262.27    7.00
   1   9   2  714.85   14.95
   1  -9   2  750.36   16.09
  -1  -9  -2  733.15   15.91
   1  -9   2  737.62   16.37
   1   9   2  730.71   16.85
   1   9   2  743.02   16.22
  -1   9  -2  724.59   16.16
   1  -9   2  750.46   15.48
  -1   9  -3   11.05    1.43
   1  -9   3    9.04    1.08
   1   9   3    9.75    1.21
  -1   9  -3   10.43    1.40
   1   9   3   12.25    1.66
   1   9   3   11.68    1.15
   1   9   3    9.14    1.27
   1  -9   3   10.49    1.47
  -1   9  -4   14.85    1.65
   1   9   4   14.94    1.49
   1  -9   4   13.80    1.74
  -1   9  -4   14.05    1.69
   1   9   4   17.35    1.30
   1   9   4   17.40    1.48
  -1   9  -5    2.76    1.07
   1   9   5    2.93    0.86
   1  -9   5    2.92    0.74
   1   9   5    2.88    0.83
   1   9   5    3.03    0.72
   1  -9   5    2.75    0.92
   1   9   5    2.86    0.77
  -1   9  -5    1.87    0.86
   1   9   5    3.05    0.75
  -1  -9  -6  129.77    6.11
   1   9   6  129.85    4.29
   1  -9   6  129.14    4.45
   1   9   6  132.29    4.26
  -1   9  -6  122.48    5.76
   1   9   6  132.72    4.01
   1   9   6  132.05    5.05
   1   9   6  131.13    4.63
  -1   9  -6  138.44    5.53
   1  -9   6  135.83    5.66
   1   9   7  367.50    9.07
   1   9   7  372.35    9.44
  -1  -9  -7  344.81   11.49
   1   9   7  363.76    8.61
   1  -9   7  360.29    9.21
  -1   9  -7  374.39   10.57
  -1   9  -7  370.83   11.48
   1   9   7  353.90    8.75
  -1   9  -8  161.42    6.20
  -1  -9  -8  143.73    6.95
   1   9   8  160.65    5.46
  -1   9  -8  152.45    6.94
   1   9   8  151.81    5.13
   1   9   8  151.55    4.78
   1  -9   8  151.11    5.18
   1   9   9    0.08    0.80
   1  -9   9    0.50    0.78
   1   9   9   -0.16    0.79
  -1   9  -9    0.88    1.05
   1   9   9   -0.10    0.97
   1  -9   9   -0.21    0.59
  -1  -9  -9   -0.23    1.03
   1  -9   9   -0.12    0.98
   1   9   9    0.90    0.94
   1  -9  10    2.81    0.96
   1   9  10    2.24    1.01
  -1  -9 -10    0.23    0.99
  -1   9 -10    1.72    1.22
   1  -9  10    3.76    1.11
   1   9  10    3.55    1.01
   1   9  10    2.05    0.76
   1  -9  10    2.26    0.84
   1   9  10    2.27    0.85
   1  -9  10    1.88    0.68
   1  -9  11   14.17    1.37
   1   9  11   12.69    1.25
   1  -9  11   13.02    1.56
   1   9  11   14.42    1.25
   1  -9  11   13.72    1.43
   1  -9  11   12.57    1.06
   1   9  11   12.71    1.40
   1  -9  12    3.82    0.70
   1   9  12    3.75    0.66
   1  -9  12    3.72    0.80
   1  -9  12    2.65    0.78
   1   9  12    3.50    0.84
   1   9  12    3.46    0.72
   1  -9  13   29.46    1.31
   1   9  13   25.83    1.24
   1  -9  13   26.53    1.42
  -1 -10  13    6.74    0.60
  -1 -10  13    6.41    0.82
  -1  10  13    5.47    0.70
  -1 -10  12    0.85    0.54
  -1  10  12    0.60    0.59
  -1 -10  12    1.54    0.75
  -1  10  12    0.58    0.69
  -1 -10  11    1.04    0.71
  -1  10  11   -0.07    0.75
  -1  10  11    0.22    0.67
  -1 -10  11    0.79    0.90
  -1 -10  10    0.45    0.96
   1 -10 -10    0.21    0.97
  -1 -10  10    0.56    0.58
  -1  10  10    0.93    0.83
  -1 -10  10    0.80    0.66
  -1  10  10    1.75    0.97
  -1 -10   9  149.08    4.75
  -1  10   9  149.73    4.95
   1 -10  -9  137.49    6.64
  -1 -10   9  141.01    4.71
  -1 -10   9  149.96    5.42
  -1 -10   9  155.90    4.96
  -1  10   9  148.20    5.48
   1 -10  -8  257.11    8.91
  -1 -10   8  271.04    7.04
  -1  10   8  271.11    7.85
  -1  10   8  258.49    7.06
  -1 -10   8  266.49    7.13
  -1  10   8  267.57    7.27
  -1 -10   8  260.88    7.26
  -1 -10   7  188.32    5.66
   1 -10  -7  165.94    7.15
  -1 -10   7  176.10    5.42
  -1  10   7  181.11    5.28
   1 -10  -7  178.55    6.91
  -1 -10   7  189.68    5.31
  -1  10   7  182.71    7.11
  -1  10   7  177.41    5.47
  -1  10   7  176.06    5.83
  -1  10   7  185.06    6.05
  -1 -10   6   -0.41    0.55
  -1  10   6   -0.07    0.62
  -1 -10   6   -0.08    0.62
   1 -10  -6    0.54    0.86
  -1  10   6    0.56    0.89
  -1  10   6    0.52    0.80
  -1 -10   6    0.27    0.67
   1 -10  -6    0.47    0.81
  -1  10   6    0.07    0.51
   1  10  -6    0.39    1.15
   1  10  -5   36.11    3.02
  -1 -10   5   38.74    1.91
  -1  10   5   35.56    2.84
   1 -10  -5   39.88    3.06
  -1  10   5   38.78    1.99
  -1 -10   5   41.45    2.75
   1 -10  -5   34.68    2.61
   1  10  -5   38.00    2.27
  -1 -10   5   38.78    2.08
  -1  10   5   39.11    2.09
  -1  10   5   39.12    2.31
  -1  10   5   37.94    1.88
  -1  10   4   95.67    3.27
  -1 -10   4   95.68    4.31
  -1 -10   4   89.75    3.25
   1  10  -4   98.07    4.75
   1 -10  -4   96.05    4.58
  -1  10   4   91.91    4.57
  -1  10   4   96.23    3.61
   1 -10  -4   97.12    4.25
  -1  10   4   93.03    3.22
   1  10  -4   90.27    3.85
  -1  10   3    1.13    0.87
   1  10  -3    0.10    0.58
  -1  10   3   -0.14    0.74
   1  10  -3    0.59    0.79
   1 -10  -3   -0.23    0.70
   1 -10  -3   -0.14    0.84
  -1  10   3   -0.13    0.73
   1  10  -3    0.11    0.66
  -1 -10   3   -0.14    0.75
  -1 -10   3    0.13    0.85
   1 -10  -2  155.44    5.32
  -1  10   2  169.84    5.70
   1  10  -2  163.19    6.00
  -1 -10   2  166.24    5.81
   1 -10  -2  158.72    5.40
  -1  10   2  171.69    6.00
   1  10  -2  160.94    5.03
  -1 -10   2  160.41    4.97
   1  10  -2  154.79    5.42
   1 -10  -2  159.91    5.85
  -1  10   2  161.32    6.00
  -1  10   1    2.86    0.87
   1 -10  -1    4.68    0.96
   1  10  -1    2.98    0.75
   1 -10  -1    2.74    0.81
  -1  10   1    1.87    0.89
   1 -10  -1    3.12    1.27
   1  10  -1    2.00    0.83
   1  10  -1    3.33    0.97
  -1 -10   0    9.49    1.45
   1 -10   0   12.35    1.33
   1  10   0   10.99    1.52
  -1  10   0   12.11    1.51
  -1  10   0   13.34    1.48
  -1  10   0   11.17    1.50
   1  10   0   11.13    1.18
   1 -10   0    9.61    1.23
   1 -10   0   15.45    2.02
  -1  10  -1  133.86    5.17
  -1  10  -1  138.93    5.18
   1 -10   1  139.56    4.88
   1  10   1  143.06    5.18
  -1  10  -1  137.58    5.01
   1 -10   1  141.26    5.46
   1 -10   1  132.96    4.78
   1  10   1  144.62    5.55
  -1 -10  -1  140.50    4.79
  -1  10  -2  535.99   13.32
  -1 -10  -2  556.23   12.86
   1 -10   2  524.07   12.75
  -1  10  -2  537.24   13.03
   1  10   2  543.37   11.60
   1  10   2  557.70   13.78
   1 -10   2  532.99   13.12
   1  10   2  544.46   13.05
   1 -10   2  539.40   12.14
   1 -10   3  102.06    4.52
  -1  10  -3  104.25    4.54
   1  10   3   99.83    3.62
  -1  10  -3   98.51    4.36
  -1 -10  -3  106.91    4.43
   1  10   3  101.97    4.34
   1 -10   3  104.25    3.55
   1  10   3   95.75    3.35
   1  10   3  105.23    4.90
   1  10   3   96.01    4.11
   1  10   4    1.84    0.61
  -1 -10  -4    1.85    1.04
   1 -10   4    2.10    0.68
   1  10   4    2.81    0.73
   1  10   4    3.16    0.75
   1 -10   4    3.17    1.08
  -1  10  -4    2.69    1.07
   1  10   4    1.15    0.70
  -1  10  -4    2.99    1.04
   1  10   5   31.48    1.68
  -1  10  -5   29.79    2.67
   1  10   5   29.47    2.11
  -1  10  -5   30.08    2.47
   1  10   5   29.22    1.84
  -1 -10  -5   27.57    2.71
   1 -10   5   29.64    1.97
   1 -10   5   27.91    2.48
  -1  10  -5   33.29    1.82
   1  10   5   29.49    1.84
   1 -10   6   81.23    4.37
  -1 -10  -6   87.10    4.95
   1  10   6   78.31    3.79
  -1  10  -6   80.06    4.59
  -1  10  -6   82.95    4.27
   1  10   6   77.85    3.20
   1 -10   6   82.36    3.50
   1  10   6   78.25    3.25
   1  10   6   84.18    3.03
   1  10   7   16.42    1.74
   1  10   7   14.00    1.51
   1  10   7   18.49    1.55
   1 -10   7   13.19    1.53
  -1  10  -7   18.24    2.09
   1  10   7   13.31    1.32
  -1 -10  -7   13.65    2.18
  -1  10  -7   18.42    2.39
  -1  10  -8   13.01    1.76
   1 -10   8   10.79    1.36
  -1 -10  -8    9.47    1.90
  -1  10  -8   11.74    2.11
   1  10   8    9.50    1.25
   1  10   8   10.61    1.36
   1  10   8    8.96    1.37
   1  10   8   13.20    1.68
   1  10   9   11.53    1.39
  -1  10  -9   11.67    2.11
   1 -10   9    8.76    1.43
   1  10   9    8.86    1.34
  -1 -10  -9    7.15    1.79
   1 -10   9   10.26    1.35
   1 -10  10    2.29    0.97
   1  10  10    3.45    0.93
   1  10  10    3.93    1.04
   1 -10  10    1.64    0.84
   1 -10  10    1.93    0.83
   1  10  11   22.30    1.52
   1 -10  11   24.32    1.67
   1 -10  11   22.79    1.84
   1 -10  11   22.18    1.62
   1  10  11   21.71    1.64
   1  10  11   24.79    1.54
   1 -10  12    1.32    0.53
   1  10  12    2.17    0.65
   1 -10  12    1.48    0.60
   1  10  12    3.51    0.87
   1  10  12    1.81    0.54
   1 -10  12    1.41    0.65
   1 -10  13    0.19    0.39
   1  10  13   -0.27    0.39
  -1  11  13   -0.33    0.46
  -1 -11  13    0.16    0.42
  -1 -11  12    3.09    0.80
  -1 -11  12    2.48    0.55
  -1  11  12    3.22    0.75
  -1  11  12    3.42    0.69
  -1 -11  11   11.61    1.02
  -1  11  11   11.87    1.17
  -1 -11  11   10.73    1.05
  -1 -11  11   12.22    1.43
  -1 -11  10   26.04    2.07
  -1 -11  10   23.87    1.69
  -1 -11  10   22.90    1.60
  -1  11  10   23.33    1.74
  -1 -11   9    9.91    1.16
  -1  11   9   12.28    1.71
  -1 -11   9   10.25    1.25
  -1  11   9   10.09    1.33
  -1  11   9   12.53    1.40
  -1 -11   9    9.94    1.50
  -1  11   8   89.20    3.51
  -1  11   8   86.85    3.95
  -1 -11   8   91.46    3.43
  -1 -11   8   90.74    3.77
  -1  11   8   87.76    3.63
   1 -11  -8   87.04    4.72
  -1 -11   8   95.39    3.70
   1 -11  -7   17.84    2.34
  -1  11   7   19.48    1.58
  -1 -11   7   18.66    1.59
  -1 -11   7   18.41    1.65
   1 -11  -7   17.71    2.11
  -1  11   7   18.13    2.26
   1  11  -7   16.79    2.36
  -1  11   7   18.31    1.89
  -1  11   7   17.49    1.39
  -1  11   7   16.56    1.63
  -1 -11   7   20.43    1.52
  -1  11   6   91.96    4.91
  -1 -11   6   85.95    3.17
   1 -11  -6   88.34    4.94
  -1  11   6   84.65    3.18
   1  11  -6   88.44    5.09
  -1 -11   6   93.91    3.58
   1 -11  -6   94.60    4.65
  -1  11   6   86.85    3.78
  -1  11   6   93.93    3.39
  -1 -11   5  152.79    5.88
  -1  11   5  143.79    4.28
  -1 -11   5  142.13    4.24
  -1  11   5  144.45    4.52
   1  11  -5  149.25    6.54
   1 -11  -5  145.63    6.33
   1  11  -5  150.94    5.16
  -1  11   5  157.23    5.14
   1 -11  -5  150.99    5.90
  -1  11   5  149.16    6.34
  -1  11   5  140.94    4.55
  -1 -11   5  159.20    4.79
  -1 -11   4  200.70    6.95
   1  11  -4  197.96    6.35
   1  11  -4  203.01    6.42
  -1  11   4  183.58    5.02
   1  11  -4  200.61    7.47
  -1  11   4  193.94    5.35
  -1  11   4  200.53    7.36
   1 -11  -4  210.77    6.92
  -1  11   4  196.35    5.49
  -1 -11   4  201.72    5.57
   1 -11  -4  201.97    7.39
   1  11  -3  171.47    5.80
  -1  11   3  162.32    4.56
  -1 -11   3  158.51    6.10
  -1  11   3  157.75    4.72
   1  11  -3  149.07    5.30
   1 -11  -3  183.00    6.66
   1 -11  -3  173.53    5.93
  -1  11   3  165.73    6.11
  -1  11   3  163.79    6.43
   1  11  -3  167.72    6.51
  -1 -11   2  402.32   10.89
  -1  11   2  389.99   10.60
  -1  11   2  398.03   11.09
   1 -11  -2  403.32   10.29
   1  11  -2  396.71   10.37
   1 -11  -2  393.89   10.27
   1  11  -2  383.04    9.68
  -1  11   2  395.07   10.92
  -1  11   2  370.71    8.88
  -1 -11   2  387.76    8.88
   1 -11  -2  418.50   11.19
   1  11  -2  403.89   11.23
  -1  11   1   43.06    2.79
  -1  11   1   42.07    2.91
   1 -11  -1   41.86    3.16
   1 -11  -1   46.16    2.69
  -1  11   1   38.19    2.84
   1 -11  -1   40.05    2.52
   1  11  -1   41.13    2.70
  -1 -11   1   51.19    3.04
   1  11  -1   43.91    2.41
   1  11  -1   46.36    3.14
   1 -11   0    2.27    1.57
  -1  11   0   -0.37    0.64
  -1  11   0   -0.06    0.50
  -1  11   0   -0.27    0.78
  -1  11   0   -0.28    0.84
  -1 -11   0    0.44    1.40
   1 -11   0    1.02    0.80
   1  11   0    0.45    0.84
   1  11   0    0.38    0.47
   1 -11   0    0.11    0.58
   1 -11   1  208.87    6.63
  -1  11  -1  193.41    6.60
   1 -11   1  188.48    6.27
   1 -11   1  227.63    7.34
   1  11   1  210.16    7.36
  -1  11  -1  214.61    7.03
  -1  11  -1  202.38    6.97
   1  11   1  204.52    6.81
  -1  11  -1  201.78    5.41
  -1 -11  -1  212.11    6.50
  -1 -11  -2   70.30    3.49
  -1 -11  -2   60.60    3.72
   1  11   2   80.49    4.28
  -1  11  -2   68.20    3.77
   1  11   2   69.92    3.65
   1 -11   2   69.06    3.52
  -1  11  -2   67.88    3.65
  -1  11  -2   67.25    2.67
   1 -11   2   71.67    3.80
  -1  11  -3    0.78    0.82
  -1 -11  -3    1.19    1.00
   1 -11   3    1.02    0.94
  -1  11  -3    2.16    1.02
   1  11   3    0.65    0.77
  -1  11  -3    1.03    0.85
  -1 -11  -3    1.08    0.82
   1  11   3    1.22    1.04
  -1  11  -3    0.81    0.48
   1 -11   3    1.61    0.66
  -1 -11  -4    1.06    0.85
   1 -11   4    1.10    0.65
   1 -11   4    1.25    0.92
   1  11   4    1.68    0.85
  -1  11  -4    3.09    1.14
   1  11   4    1.76    0.68
  -1  11  -4    1.20    0.93
   1  11   4    3.21    0.90
  -1 -11  -4    2.21    1.10
   1  11   5   95.49    3.96
  -1  11  -5  100.28    5.03
  -1  11  -5   99.24    4.74
   1 -11   5   83.30    4.51
  -1 -11  -5   97.16    5.23
  -1 -11  -5   95.26    4.83
   1  11   5   94.56    3.19
   1  11   5   91.88    3.50
  -1  11  -5   94.71    3.46
   1  11   6   13.86    1.26
  -1  11  -6   13.34    2.07
  -1 -11  -6   12.47    2.08
  -1  11  -6   12.67    1.78
   1 -11   6   10.70    1.69
   1 -11   6   12.28    1.43
   1  11   6   12.17    1.41
  -1 -11  -6   11.78    1.85
   1  11   7   34.49    2.24
   1  11   7   37.38    2.08
  -1  11  -7   37.97    3.38
  -1  11  -7   35.36    2.86
   1 -11   7   35.41    2.36
  -1 -11  -7   38.06    3.42
  -1  11  -8   53.57    3.42
   1  11   8   54.23    2.48
   1  11   8   53.16    2.82
   1  11   8   54.16    2.63
  -1  11  -8   57.04    4.14
  -1 -11  -8   53.27    3.89
   1 -11   8   57.15    3.03
   1  11   8   58.01    2.86
  -1 -11  -8   55.17    4.17
   1  11   9   12.04    1.38
  -1  11  -9   10.76    1.95
  -1 -11  -9   10.95    2.03
   1 -11   9   12.12    1.39
   1  11   9   11.99    1.46
  -1 -11  -9   12.71    2.07
   1  11   9   11.45    1.36
   1  11  10    2.36    0.86
   1 -11  10    2.67    0.77
   1 -11  10    2.25    1.03
   1 -11  10    2.89    0.93
   1  11  10    1.17    0.77
   1  11  11    0.23    0.58
   1 -11  11   -0.16    0.68
   1 -11  11    0.56    0.57
   1 -11  11    0.06    0.61
   1 -11  12   14.68    1.16
   1  11  12   13.00    0.97
   1 -11  12   14.33    0.96
   1  11  12   14.24    0.94
   1 -11  12   15.13    1.00
   1 -11  13   29.89    1.12
   1  11  13   26.06    1.01
  -1  12  13    5.47    0.51
  -1 -12  12    0.28    0.57
  -1  12  12   -0.04    0.47
  -1 -12  11   19.75    1.58
  -1 -12  11   18.87    1.16
  -1 -12  11   18.12    1.20
  -1  12  11   20.49    1.40
  -1  12  10    0.29    0.73
  -1 -12  10    0.36    0.54
  -1 -12  10    0.22    0.56
  -1  12  10    0.08    0.73
  -1 -12  10   -0.10    0.78
  -1 -12   9   25.97    1.67
  -1  12   9   27.04    1.88
  -1 -12   9   25.55    1.87
  -1 -12   9   25.36    2.14
  -1  12   9   29.20    1.96
  -1 -12   8   17.00    1.41
   1  12  -8   15.10    2.27
  -1 -12   8   18.42    1.69
  -1  12   8   16.27    1.63
  -1  12   8   16.21    1.51
   1 -12  -8   15.88    2.29
   1 -12  -7   13.52    2.07
  -1 -12   7   13.28    1.25
   1  12  -7   12.22    2.10
  -1  12   7   11.29    1.18
  -1  12   7   12.29    1.31
  -1  12   7   13.44    1.97
   1 -12  -7   13.06    1.86
  -1 -12   7   12.66    1.48
  -1 -12   6    6.93    0.93
  -1  12   6    6.66    1.49
   1  12  -6    5.20    1.51
  -1 -12   6    5.28    1.02
  -1  12   6    8.44    1.05
   1 -12  -6    6.38    1.52
  -1  12   6    7.30    1.04
  -1  12   6    6.96    1.20
   1 -12  -6    7.88    1.51
   1  12  -5   15.35    2.18
  -1 -12   5   16.94    1.93
  -1 -12   5   14.67    1.47
   1  12  -5   16.79    1.77
  -1  12   5   12.86    1.35
  -1 -12   5   15.39    1.23
  -1  12   5   16.45    1.31
  -1  12   5   15.74    2.11
   1 -12  -5   14.95    1.91
   1 -12  -5   17.31    2.21
  -1  12   5   17.14    1.45
  -1 -12   4    1.06    0.71
   1  12  -4    0.37    0.59
   1 -12  -4    0.15    0.72
   1  12  -4    0.58    0.99
  -1  12   4    1.33    0.65
  -1 -12   4    0.48    0.76
  -1  12   4    0.55    0.88
   1  12  -4    0.50    0.57
  -1  12   4    1.13    0.71
  -1  12   4    0.75    0.62
   1 -12  -4    0.73    0.92
   1 -12  -3   54.14    3.63
  -1  12   3   53.80    3.66
   1  12  -3   52.39    3.10
  -1 -12   3   53.08    3.43
   1 -12  -3   53.24    3.22
  -1  12   3   52.24    3.35
   1  12  -3   54.11    3.71
  -1  12   3   48.29    2.23
   1 -12  -3   51.75    3.12
   1  12  -3   51.45    2.88
  -1  12   3   48.90    2.44
   1  12  -2   52.11    3.58
   1  12  -2   57.60    3.31
  -1 -12   2   57.73    3.61
   1  12  -2   56.55    2.30
  -1  12   2   59.16    3.74
   1 -12  -2   62.33    3.35
  -1  12   2   54.28    2.52
  -1  12   2   55.64    3.56
   1  12  -2   51.79    2.83
   1 -12  -2   55.25    3.82
  -1  12   2   53.77    2.28
  -1  12   2   60.39    3.53
   1 -12  -2   57.70    3.27
  -1  12   1   38.22    3.00
  -1  12   1   41.57    2.87
   1  12  -1   35.99    2.97
   1 -12  -1   40.74    2.66
  -1  12   1   39.13    2.88
   1  12  -1   36.72    2.30
   1  12  -1   32.57    2.57
   1  12  -1   42.20    2.01
   1 -12  -1   34.48    3.21
   1 -12  -1   40.44    2.62
   1 -12   0    2.43    0.89
   1  12   0    4.60    1.33
  -1  12   0    3.35    1.04
  -1  12   0    1.70    0.93
   1 -12   0    5.87    1.37
   1  12   0    3.57    0.85
   1 -12   0   14.37    2.60
  -1  12   0    3.32    0.78
  -1 -12   0   11.68    2.38
  -1  12  -1  127.09    5.45
   1 -12   1  133.54    5.67
  -1  12  -1  127.38    5.44
  -1  12  -1  120.32    5.15
  -1 -12  -1  123.36    5.53
   1  12   1  120.76    5.24
  -1 -12  -1  125.64    5.22
   1 -12   1  131.80    5.21
   1  12   1  133.63    5.91
  -1  12  -1  125.80    4.07
   1 -12   1  131.92    5.16
   1  12   2  103.19    4.67
   1  12   2  100.13    4.68
  -1 -12  -2   98.41    4.41
   1 -12   2   99.62    4.74
  -1 -12  -2   97.37    4.94
   1  12   2   98.74    5.06
  -1  12  -2  101.67    4.83
  -1  12  -2   94.05    4.59
  -1  12  -2   94.06    3.41
   1  12   3   70.50    3.80
   1 -12   3   65.57    2.93
  -1  12  -3   57.57    3.75
   1  12   3   59.91    4.01
  -1  12  -3   75.35    4.13
  -1 -12  -3   72.73    4.31
   1 -12   3   63.72    3.80
  -1  12  -3   65.48    3.85
  -1  12  -3   64.17    2.65
  -1 -12  -3   68.48    3.80
  -1 -12  -4   13.07    2.02
  -1  12  -4   11.07    1.76
   1  12   4   10.25    1.01
   1 -12   4   11.75    1.34
  -1  12  -4   13.76    1.85
   1 -12   4   11.87    1.73
  -1 -12  -4   10.44    1.66
  -1  12  -4   11.42    1.75
   1  12   5    3.77    1.19
   1 -12   5    0.17    0.79
   1  12   5    0.82    0.70
  -1  12  -5    0.19    0.95
  -1  12  -5    1.02    0.97
  -1 -12  -5   -0.63    1.11
  -1 -12  -5    0.18    0.85
  -1  12  -5    0.24    0.62
   1 -12   6  113.72    4.39
   1  12   6  110.42    3.67
  -1  12  -6  109.69    5.68
   1 -12   6  106.46    5.26
  -1  12  -6  106.70    5.20
   1  12   6  113.00    4.11
  -1  12  -6  110.41    3.75
  -1 -12  -6  115.97    6.03
  -1 -12  -6  112.50    5.54
  -1  12  -7   13.39    2.14
   1  12   7   17.20    1.47
   1 -12   7   13.50    1.60
  -1  12  -7   18.05    2.10
  -1 -12  -7   17.66    2.28
   1  12   7   18.05    1.67
   1  12   7   16.13    1.41
  -1 -12  -7   16.71    2.39
   1 -12   8  470.02   11.33
  -1  12  -8  421.87   13.41
   1  12   8  508.44   11.05
   1  12   8  482.02   10.63
   1  12   8  453.78   10.89
  -1 -12  -8  448.89   13.91
   1  12   8  463.16   10.46
  -1 -12  -8  451.73   13.42
   1  12   9   23.32    1.71
   1  12   9   23.12    1.64
   1 -12   9   22.19    1.76
   1  12   9   28.64    2.00
   1 -12  10   37.18    2.05
   1  12  10   37.73    1.98
   1  12  10   37.42    1.92
  -1  12 -10   30.36    1.63
   1 -12  10   33.88    1.94
   1 -12  11    4.50    0.89
   1 -12  11    3.49    0.69
   1 -12  11    3.52    0.69
   1  12  11    3.26    0.69
   1  12  12    0.38    0.40
   1 -12  12    0.32    0.44
  -1  13  12   22.90    1.12
  -1 -13  12   22.02    1.21
  -1  13  11   -0.70    0.64
  -1  13  11    0.76    0.62
  -1 -13  11    0.07    0.63
  -1 -13  10    0.54    0.57
  -1  13  10    0.64    0.67
  -1 -13  10    0.98    0.51
  -1 -13  10    0.18    0.71
  -1  13  10    0.99    0.74
  -1 -13   9   12.82    1.09
  -1 -13   9   12.78    1.35
  -1  13   9   14.96    1.34
  -1  13   9   12.99    1.34
  -1 -13   9   10.23    1.44
   1 -13  -8    1.50    1.10
  -1 -13   8    1.11    0.58
   1  13  -8    1.57    1.12
  -1 -13   8    1.42    0.82
  -1  13   8    1.62    0.83
   1  13  -7    2.97    1.35
  -1 -13   7    2.71    0.89
  -1  13   7    2.45    0.84
  -1 -13   7    2.99    0.75
  -1  13   7    2.68    0.91
  -1  13   7    2.66    0.75
   1 -13  -7    2.39    1.09
  -1 -13   6   67.70    2.67
  -1  13   6   63.43    2.89
  -1  13   6   67.69    2.76
  -1  13   6   65.63    4.28
  -1  13   6   71.81    3.12
   1  13  -6   68.86    4.64
   1 -13  -6   67.24    4.44
  -1  13   5   59.05    2.45
  -1  13   5   59.92    4.07
   1 -13  -5   63.76    3.87
   1 -13  -5   60.04    3.64
  -1  13   5   56.66    2.74
   1  13  -5   56.15    4.08
   1 -13  -5   56.98    4.05
  -1  13   5   54.77    2.69
  -1  13   4  104.61    5.48
  -1 -13   4  105.75    5.09
   1 -13  -4  111.18    5.60
   1 -13  -4  102.94    4.92
  -1  13   4   99.66    3.63
   1  13  -4  112.80    5.73
   1 -13  -4  102.35    4.77
  -1  13   4  103.82    3.86
  -1  13   3  101.84    4.98
  -1 -13   3  106.81    5.19
  -1  13   3  100.04    5.25
   1  13  -3  108.01    5.51
  -1  13   3   99.45    3.46
   1 -13  -3  104.35    4.73
   1 -13  -3  105.78    4.82
   1  13  -3  106.27    4.73
  -1  13   3  102.21    3.81
   1 -13  -3  106.84    5.55
   1 -13  -2    6.01    1.97
  -1  13   2    6.67    0.92
   1 -13  -2    9.31    1.45
  -1 -13   2    8.32    1.63
   1  13  -2    8.69    1.69
  -1 -13   2    6.87    1.51
  -1  13   2    7.30    1.51
  -1  13   2    8.13    1.59
   1 -13  -2    6.12    1.29
   1  13  -2    7.84    1.33
  -1  13   2    8.21    1.08
  -1  13   2    6.34    1.34
   1  13  -2    8.36    0.95
  -1  13   1   37.60    3.14
   1  13  -1   37.71    3.18
  -1  13   1   40.93    3.00
   1 -13  -1   41.62    2.79
   1  13  -1   37.88    2.01
  -1  13   1   40.13    3.10
   1 -13  -1   37.74    2.64
  -1 -13   1   43.98    3.33
   1  13  -1   38.83    2.87
  -1 -13   1   39.83    3.16
   1 -13  -1   37.52    3.60
  -1  13   0   21.12    2.26
  -1  13   0   20.98    1.63
   1  13   0   23.86    2.56
  -1  13   0   21.78    2.19
  -1 -13   0   23.63    2.43
   1  13   0   25.03    1.64
   1 -13   0   28.29    2.33
   1  13   0   19.70    1.75
   1  13   1   11.08    1.84
  -1  13  -1   11.78    1.77
  -1 -13  -1   11.39    2.41
  -1 -13  -1   13.00    1.91
  -1  13  -1   11.46    1.67
  -1  13  -1   11.34    1.20
   1 -13   1   14.57    1.72
   1 -13   2  253.02    6.70
  -1  13  -2  236.17    8.25
   1  13   2  240.46    8.19
  -1 -13  -2  239.90    8.67
  -1  13  -2  243.18    6.51
   1  13   2  266.76    9.25
  -1  13  -2  244.28    8.46
  -1 -13  -2  246.33    8.26
   1 -13   2  248.76    8.41
   1  13   3   56.09    4.02
  -1  13  -3   52.10    3.56
   1 -13   3   51.21    2.63
  -1  13  -3   51.72    3.54
  -1 -13  -3   53.15    3.81
  -1  13  -3   48.77    3.49
   1 -13   3   47.25    3.41
  -1 -13  -3   50.66    3.33
   1  13   3   49.94    3.36
   1 -13   4   12.84    1.83
  -1  13  -4    8.28    1.60
  -1 -13  -4    9.16    1.62
  -1  13  -4   10.91    1.81
  -1  13  -4   13.73    1.40
  -1 -13  -4   11.12    1.92
   1  13   4   12.35    1.05
   1 -13   4   11.30    1.34
  -1  13  -4   11.42    1.84
   1  13   5    2.70    0.74
   1  13   5    3.22    0.90
  -1 -13  -5    0.93    0.91
  -1  13  -5    2.75    0.85
  -1  13  -5    2.38    1.21
  -1  13  -5    1.60    1.10
  -1  13  -5    2.92    1.21
   1 -13   5    4.68    1.21
   1 -13   5    2.22    0.90
  -1 -13  -5    3.29    1.44
  -1  13  -6  112.00    5.73
  -1  13  -6  106.46    5.65
   1  13   6  118.52    3.79
  -1  13  -6  117.02    5.54
  -1  13  -6  115.07    3.91
   1  13   6  116.12    4.16
   1 -13   6  108.33    5.33
  -1 -13  -6  125.44    5.89
   1  13   6  124.02    4.21
  -1 -13  -6  111.21    5.98
   1 -13   7   -0.21    0.76
   1  13   7    0.80    0.66
  -1  13  -7   -0.42    1.02
  -1 -13  -7    0.40    0.93
  -1  13  -7   -0.34    0.84
  -1  13  -7    1.66    1.13
   1  13   7    1.15    0.80
  -1 -13  -7    0.23    0.99
   1  13   8   21.99    1.57
   1  13   8   19.79    1.44
   1 -13   8   18.83    1.75
   1  13   9    7.68    1.12
   1  13   9    7.60    1.01
   1 -13   9    6.80    1.07
   1  13  10    2.80    0.74
   1 -13  10    2.67    0.72
   1  13  10    3.25    0.75
  -1  13 -10    2.34    0.57
   1 -13  11    0.34    0.44
   1  13  11    0.71    0.53
   1 -13  11   -0.06    0.58
   1  13  11    0.34    0.50
   1  13  12    0.21    0.30
   1 -13  12    0.19    0.36
   1  13  12   -0.07    0.33
  -1  14  12    3.43    0.50
  -1 -14  12    3.84    0.47
  -1  14  11    0.04    0.51
  -1 -14  11    1.04    0.55
  -1  14  11    1.00    0.53
  -1 -14  10    8.28    0.93
  -1 -14  10    9.39    1.15
  -1  14  10    7.32    0.95
  -1  14  10    8.79    1.03
  -1 -14   9   16.03    1.41
  -1  14   9   17.15    1.47
  -1 -14   9   15.90    1.61
  -1  14   9   17.55    1.35
  -1  14   8  126.82    3.97
  -1  14   8  116.01    3.78
  -1 -14   8  130.16    4.48
  -1  14   7   13.65    1.43
   1  14  -7   13.90    2.21
   1 -14  -7   15.98    2.09
   1 -14  -7   11.46    1.98
  -1  14   7   14.35    1.34
  -1 -14   7   15.01    1.56
  -1  14   7   14.78    1.34
  -1  14   6    2.23    1.11
  -1 -14   6    3.07    0.98
  -1  14   6    2.39    0.81
  -1  14   6    3.34    0.99
   1 -14  -6    2.18    1.14
  -1  14   6    2.55    0.80
   1  14  -6    2.27    1.29
   1 -14  -6    2.86    1.34
   1 -14  -5   15.29    2.28
   1  14  -5   10.79    2.00
  -1  14   5   16.29    2.21
  -1  14   5   17.14    1.51
   1 -14  -5   14.09    1.91
  -1  14   5   13.01    1.41
  -1  14   5   16.19    1.29
   1  14  -4    0.22    1.18
  -1  14   4   -0.21    1.07
   1 -14  -4    0.33    0.92
   1 -14  -4   -0.16    0.62
  -1 -14   4   -0.35    0.91
  -1  14   4   -0.23    0.79
  -1  14   4   -0.09    0.67
   1 -14  -3   24.68    3.10
   1  14  -3   19.72    2.46
  -1 -14   3   20.62    2.44
   1 -14  -3   23.52    2.30
  -1 -14   3   22.34    2.45
  -1  14   3   25.21    2.72
  -1  14   3   24.22    1.64
  -1  14   3   24.44    1.78
   1 -14  -3   23.28    2.22
  -1 -14   2    7.62    1.56
   1 -14  -2    7.34    1.40
  -1  14   2    8.14    1.13
  -1 -14   2    5.43    1.45
   1  14  -2    8.13    1.00
   1  14  -2    7.30    1.60
  -1  14   2    8.21    1.52
   1 -14  -2    9.54    2.56
  -1  14   2   10.49    1.78
  -1  14   2   10.02    1.86
   1 -14  -2    5.25    1.18
   1 -14  -1   26.30    2.34
  -1 -14   1   29.16    2.79
   1  14  -1   29.95    2.92
  -1  14   1   29.43    2.76
  -1  14   1   29.69    2.86
  -1  14   1   28.45    2.63
  -1 -14   1   34.14    3.04
   1  14  -1   28.31    1.79
  -1  14   0   -0.09    0.63
   1 -14   0    1.99    0.97
  -1 -14   0    0.57    0.93
   1  14   0    0.21    1.04
  -1  14   0    1.21    1.01
   1  14   0    0.39    0.62
  -1  14   0    2.00    1.11
  -1  14   0    1.03    0.82
   1  14   1    1.30    0.71
   1 -14   1    0.47    0.60
   1  14   1    0.85    1.01
  -1  14  -1    1.21    0.94
  -1 -14  -1    0.97    1.04
  -1  14  -1    0.55    0.82
  -1  14  -1    0.68    0.65
   1 -14   1    0.78    0.75
   1 -14   2   73.82    3.10
   1  14   2   63.35    3.95
  -1  14  -2   62.44    3.98
   1  14   2   73.09    4.67
  -1  14  -2   69.63    4.24
  -1 -14  -2   73.32    4.49
   1 -14   2   66.06    4.09
  -1  14  -2   68.45    2.97
  -1 -14  -2   66.95    4.51
   1  14   2   70.25    2.66
   1  14   3   29.29    3.02
   1  14   3   33.62    2.79
  -1  14  -3   33.98    2.98
  -1  14  -3   31.16    2.84
  -1 -14  -3   31.67    3.04
   1  14   3   36.26    1.94
   1 -14   3   33.93    2.15
   1 -14   3   33.11    2.92
  -1 -14  -3   22.72    3.03
   1  14   3   35.16    2.14
   1  14   4   18.52    1.52
  -1  14  -4   14.73    2.10
  -1  14  -4   16.82    1.58
  -1 -14  -4   20.00    2.44
  -1  14  -4   15.88    2.12
  -1  14  -4   16.45    2.23
   1 -14   4   20.10    1.77
   1  14   4   18.69    1.59
   1 -14   4   18.75    2.17
  -1 -14  -4   17.93    2.16
   1  14   5  210.45    5.91
  -1  14  -5  193.77    7.87
  -1 -14  -5  210.89    8.41
  -1  14  -5  201.48    7.73
  -1  14  -5  205.64    8.01
  -1  14  -5  212.29    6.01
  -1 -14  -5  199.70    7.73
   1 -14   5  203.35    6.30
   1 -14   5  184.53    7.37
   1  14   5  200.15    5.27
   1  14   5  212.47    6.11
   1  14   6    4.39    0.86
  -1  14  -6    2.52    1.15
  -1  14  -6    2.45    1.16
  -1  14  -6    2.75    0.74
  -1  14  -6    3.03    1.19
   1  14   6    3.23    0.97
  -1 -14  -6    2.89    1.23
  -1 -14  -6    3.33    1.42
   1  14   6    2.83    0.84
  -1  14  -7   16.83    2.28
   1  14   7   19.43    1.42
  -1  14  -7   19.22    2.32
  -1 -14  -7   11.63    1.91
  -1 -14  -7   17.80    2.38
   1  14   7   19.37    1.65
   1 -14   7   16.32    1.65
   1  14   7   18.44    1.50
   1  14   8   -0.13    0.53
   1 -14   8    0.46    0.73
   1  14   8    0.13    0.63
   1  14   9   37.20    1.80
   1  14   9   36.62    1.95
   1 -14   9   32.57    1.98
  -1  14  -9   31.53    1.83
   1 -14   9   37.06    1.91
   1  14  10    9.09    0.87
  -1  14 -10    7.31    0.69
   1  14  10    9.64    0.94
   1 -14  11    3.13    0.49
   1  14  11    2.58    0.53
   1  14  11    2.97    0.51
   1 -14  11    3.48    0.65
  -1 -15  11    2.73    0.54
  -1  15  11    2.31    0.51
  -1 -15  10    0.49    0.43
  -1  15  10   -0.40    0.58
  -1  15  10   -0.10    0.57
  -1 -15  10    0.25    0.60
  -1  15   9    5.78    0.86
  -1 -15   9    6.38    0.94
  -1 -15   9    5.60    1.04
  -1 -15   8    4.51    0.88
  -1  15   8    3.93    0.73
  -1  15   8    3.34    0.84
  -1  15   8    5.66    1.01
  -1 -15   7   22.75    1.78
  -1  15   7   19.39    1.39
  -1  15   7   19.96    1.53
  -1  15   7   21.60    1.72
   1  15  -6    1.79    1.18
  -1 -15   6    5.00    1.06
  -1  15   6    2.36    0.74
   1 -15  -6    3.01    1.23
  -1  15   6    4.30    0.88
  -1  15   6    4.42    0.96
   1 -15  -5   89.24    5.61
   1  15  -5   89.43    5.31
   1 -15  -5   95.52    4.86
  -1  15   5   92.66    5.22
  -1  15   5   94.14    3.70
  -1  15   5   94.29    3.55
  -1  15   4  214.89    5.92
  -1  15   4  208.73    8.34
  -1  15   4  216.76    6.28
   1  15  -4  207.38    8.52
   1 -15  -4  204.81    8.69
   1 -15  -4  222.61    7.78
  -1  15   3   43.56    3.58
   1  15  -3   39.36    2.00
   1  15  -3   44.26    3.68
   1 -15  -3   36.78    2.91
  -1  15   3   41.50    2.15
  -1 -15   3   36.85    3.12
   1 -15  -3   41.64    4.16
  -1  15   3   40.88    2.42
   1 -15  -2    6.98    1.36
  -1 -15   2    6.28    1.54
   1  15  -2    8.59    1.82
  -1  15   2    5.49    1.42
  -1  15   2    6.11    1.12
  -1  15   2    5.84    1.57
   1  15  -2    5.78    0.91
  -1 -15   2    7.18    1.68
  -1  15   1    0.37    0.78
  -1  15   1    1.75    0.93
   1 -15  -1    1.26    0.86
   1  15  -1    0.48    0.63
  -1  15   1    0.65    1.11
   1  15  -1    0.22    1.08
  -1 -15   1    1.80    1.25
  -1 -15   1    0.81    1.00
   1  15   0   17.35    2.44
   1 -15   0   20.27    2.14
   1  15   0   20.86    1.61
  -1  15   0   23.21    2.48
  -1 -15   0   25.11    2.63
  -1  15   0   19.92    1.72
  -1  15   0   17.61    2.20
  -1  15   0   19.22    2.50
  -1 -15   0   27.08    2.97
   1 -15   0   25.89    1.65
  -1  15  -1   24.33    2.50
   1  15   1   24.90    2.78
   1 -15   1   28.37    1.83
   1  15   1   31.08    2.83
  -1  15  -1   25.83    2.61
   1  15   1   26.12    1.86
  -1 -15  -1   27.96    2.83
  -1  15  -1   25.43    1.87
   1 -15   1   25.85    2.66
  -1  15  -2  204.59    6.08
  -1  15  -2  222.79    8.25
  -1  15  -2  206.92    7.93
  -1 -15  -2  230.12    8.61
   1 -15   2  224.80    6.26
   1  15   2  220.19    8.12
   1 -15   2  217.48    8.00
   1  15   2  226.58    8.86
   1 -15   3   28.27    2.77
  -1  15  -3   34.35    3.05
   1  15   3   34.43    2.13
   1  15   3   35.20    1.93
   1 -15   3   35.95    2.23
  -1  15  -3   33.52    2.98
  -1 -15  -3   32.87    3.09
  -1  15  -4   26.82    1.96
   1 -15   4   20.21    2.31
  -1  15  -4   23.81    2.61
  -1 -15  -4   23.50    2.65
  -1  15  -4   18.88    2.31
   1 -15   4   23.55    1.89
   1  15   4   26.58    1.77
   1  15   4   23.77    1.87
   1  15   5    3.32    0.91
  -1 -15  -5    4.09    1.41
   1 -15   5    4.29    0.99
  -1  15  -5    3.33    1.17
   1  15   5    3.90    0.91
  -1  15  -5    1.60    1.07
  -1  15  -5    3.92    0.89
   1  15   6   54.08    2.61
  -1  15  -6   49.53    3.66
  -1 -15  -6   48.82    3.77
  -1  15  -6   47.53    3.52
  -1  15  -6   50.05    2.33
   1  15   6   55.97    2.66
   1  15   6   52.56    2.20
   1  15   7  119.36    3.61
   1 -15   7  111.88    4.22
   1  15   7  124.44    4.08
   1  15   7  120.05    3.96
   1 -15   8    7.72    1.07
   1  15   8    8.63    0.95
   1  15   8   10.63    1.16
   1  15   8   10.12    0.97
   1 -15   9   20.79    1.49
  -1  15  -9   21.58    1.40
   1  15   9   24.21    1.31
   1  15  10    8.58    0.82
   1  15  10    9.12    0.73
   1 -15  10    8.22    0.84
   1  15  11    2.44    0.42
   1 -15  11    1.83    0.40
  -1 -16  10   80.35    2.36
  -1 -16  10   77.49    2.53
  -1 -16   9  107.20    3.33
  -1 -16   9  111.31    3.58
  -1  16   9  105.50    3.24
  -1  16   8   31.39    1.56
  -1  16   8   28.06    1.45
  -1  16   8   33.40    1.84
  -1 -16   8   29.28    1.85
  -1  16   7   14.54    1.34
  -1  16   7   16.16    1.29
  -1 -16   7   13.41    1.40
  -1  16   7   12.64    1.06
  -1 -16   6   17.89    1.60
  -1  16   6   15.54    1.41
  -1  16   6   17.13    1.50
   1 -16  -5   -0.22    2.74
  -1  16   5    0.88    0.74
   1  16  -5    0.88    0.97
  -1  16   5   -0.07    0.67
  -1  16   5    1.41    0.93
  -1  16   4    3.50    0.85
  -1  16   4    3.38    1.31
   1  16  -4    4.27    1.50
  -1  16   4    4.16    0.98
   1  16  -3    4.52    1.50
  -1  16   3    5.87    1.58
  -1 -16   3    3.93    1.25
  -1  16   3    3.62    0.85
   1  16  -3    3.67    0.74
  -1  16   3    4.25    0.99
  -1  16   2   75.79    4.79
   1  16  -2   74.36    4.83
   1  16  -2   72.70    2.98
  -1 -16   2   73.57    4.53
  -1 -16   2   72.81    4.59
  -1  16   2   69.73    3.27
  -1 -16   1   44.90    3.58
  -1 -16   1   36.87    3.29
   1 -16  -1   51.72    4.48
  -1  16   1   39.19    3.48
  -1  16   1   36.81    2.34
   1  16  -1   43.26    2.30
   1  16  -1   44.81    3.75
  -1 -16   0   34.21    3.15
   1 -16   0   39.19    2.02
  -1 -16   0   38.14    3.40
   1  16   0   37.00    3.46
  -1  16   0   36.91    3.07
  -1  16   0   37.63    2.35
  -1  16   0   36.84    3.10
   1 -16   0   48.14    3.62
   1  16   0   39.81    2.25
  -1  16   0   36.76    3.35
  -1  16  -1   62.40    3.00
   1  16   1   66.21    4.24
  -1 -16  -1   66.68    4.37
  -1  16  -1   61.01    4.01
   1  16   1   67.59    4.60
   1 -16   1   69.48    2.92
   1  16   1   67.81    3.08
  -1  16  -1   72.18    4.35
  -1 -16  -1   78.84    4.85
   1 -16   1   65.77    4.19
   1  16   2    5.53    1.62
   1  16   2    4.94    1.32
  -1 -16  -2    4.60    1.38
  -1  16  -2    5.37    1.41
   1  16   2    4.69    1.05
   1 -16   2    2.02    1.29
   1 -16   2    5.45    0.97
  -1  16  -2    6.93    1.58
  -1  16  -2    4.71    1.49
  -1  16  -3    0.19    0.76
  -1  16  -3    0.10    0.72
   1  16   3    0.13    0.61
  -1 -16  -3    0.21    0.86
   1 -16   3    0.72    0.67
   1  16   3    0.36    0.69
  -1  16  -3   -0.19    0.86
   1  16   4    0.89    0.72
  -1  16  -4    2.08    1.12
  -1  16  -4    0.94    0.76
  -1 -16  -4    1.46    1.16
   1 -16   4    0.94    0.72
  -1  16  -4    0.39    0.79
   1  16   4    2.77    0.84
   1  16   5   36.41    2.18
  -1 -16  -5   29.62    2.94
   1  16   5   38.62    2.05
  -1  16  -5   37.61    2.14
   1 -16   5   36.15    2.28
   1 -16   6   40.00    2.37
   1  16   6   42.74    2.25
   1  16   6   43.87    2.19
  -1  16  -6   39.30    1.97
   1  16   7   14.38    1.27
   1  16   7   12.70    0.98
   1  16   7   12.03    1.15
   1  16   8    1.97    0.69
   1 -16   8    1.57    0.61
   1  16   8    1.02    0.48
   1  16   8    1.21    0.51
   1  16   9    0.28    0.40
   1 -16   9    0.50    0.52
  -1  16  -9    0.23    0.44
   1  16   9   -0.05    0.51
   1 -16  10   12.11    0.92
   1 -16  10   12.81    0.83
  -1 -17  10   33.65    1.27
  -1  17  10   36.51    1.31
  -1 -17   9    9.46    0.84
  -1  17   9    8.78    0.84
  -1 -17   9    9.83    0.95
  -1 -17   8    3.04    0.71
  -1  17   8    2.50    0.69
  -1 -17   8    3.30    0.81
  -1  17   7   10.15    0.98
  -1  17   7   10.61    1.12
  -1  17   7    8.67    0.96
  -1 -17   7   11.22    1.19
  -1  17   6    0.26    0.65
  -1 -17   6    0.34    0.73
  -1  17   6    0.44    0.64
  -1  17   5   37.75    2.00
  -1  17   5   42.63    2.12
  -1  17   5   39.08    2.22
   1  17  -4    2.15    1.15
  -1  17   4    3.54    0.88
  -1  17   4    3.74    0.78
   1  17  -3   40.52    3.53
  -1  17   3   49.43    3.77
  -1  17   3   44.83    2.49
   1  17  -2   21.90    2.63
  -1  17   2   15.72    2.27
   1  17  -2   16.70    1.35
  -1 -17   2   14.91    2.20
  -1 -17   1   38.35    3.32
  -1 -17   1   38.79    3.30
  -1  17   1   38.38    2.36
   1  17  -1   34.14    3.29
   1  17  -1   39.14    2.19
   1 -17   0   -0.19    1.48
   1  17   0    2.25    1.12
   1  17   0    1.60    1.12
  -1 -17   0    1.45    1.01
   1  17   0    2.12    0.78
  -1 -17   0    2.07    1.42
  -1  17   0    4.17    1.26
  -1  17   0    2.94    0.94
  -1  17   0    2.25    1.18
   1 -17   1    0.18    1.50
  -1 -17  -1    2.72    1.48
   1  17   1    1.57    0.98
  -1 -17  -1    1.64    1.05
   1  17   1    1.82    1.17
  -1  17  -1    0.90    0.98
  -1  17  -1    2.43    1.08
   1 -17   1    1.11    0.59
  -1  17  -1    2.03    0.82
   1  17   1    2.02    0.80
  -1 -17  -2   32.02    3.19
   1  17   2   34.21    3.23
  -1 -17  -2   33.28    3.05
   1 -17   2   31.35    1.91
  -1  17  -2   26.06    2.61
   1  17   2   31.56    2.07
  -1  17  -2   29.64    3.05
  -1  17  -3    0.54    0.81
  -1  17  -3   -0.43    1.02
  -1  17  -3    0.48    0.78
  -1 -17  -3    0.40    0.85
   1 -17   3    0.25    0.61
   1 -17   4   24.85    1.80
  -1  17  -4   24.17    1.76
   1  17   4   21.63    1.45
   1  17   4   24.42    1.79
   1 -17   5   41.89    2.32
   1  17   5   43.81    2.29
  -1  17  -5   41.64    2.16
   1  17   5   42.28    2.05
   1 -17   6   33.97    2.07
   1  17   6   40.00    1.94
  -1  17  -6   37.73    1.76
   1  17   6   38.56    2.05
   1  17   7    6.22    0.86
   1  17   7    5.12    0.80
   1  17   8    5.24    0.75
   1 -17   8    4.51    0.73
   1  17   8    4.72    0.62
   1  17   9    0.68    0.45
  -1  17  -9    0.51    0.34
  -1 -18   9    6.15    0.58
  -1 -18   9    5.33    0.58
  -1  18   9    5.08    0.57
  -1 -18   8    4.67    0.77
  -1 -18   8    4.18    0.66
  -1  18   8    4.81    0.65
  -1  18   7    9.29    0.90
  -1  18   7    7.89    0.79
  -1 -18   7    8.40    0.96
  -1  18   6    7.79    0.90
  -1  18   6    7.89    0.95
   1  18  -5    0.12    0.47
  -1  18   5   -0.24    0.47
  -1  18   5   -0.15    0.57
  -1  18   5    0.53    0.57
  -1  18   4   -0.07    0.59
  -1 -18   4   -0.25    0.68
  -1  18   4   -0.08    0.62
  -1  18   3    5.80    1.01
   1  18  -2    7.49    0.89
  -1  18   1    2.02    0.78
   1  18  -1    1.88    0.66
   1  18   0    2.08    0.72
  -1  18   0    2.41    0.79
   1 -18   1   39.89    1.97
   1  18   1   42.20    2.30
   1 -18   2   40.39    2.08
   1  18   2   38.40    2.21
  -1  18  -2   38.96    2.37
   1 -18   3   24.62    1.65
  -1  18  -3   28.53    1.93
   1 -18   4    5.80    0.92
  -1  18  -4    4.86    0.88
   1  18   4    5.47    0.75
   1  18   4    4.80    0.93
   1 -18   5    0.29    0.61
   1  18   5    0.14    0.64
  -1  18  -5    0.06    0.51
   1  18   5    0.29    0.48
   1 -18   6   11.12    1.11
   1  18   6    9.21    0.98
   1  18   6    9.38    0.90
   1 -18   7    0.50    0.48
   1  18   7   -0.05    0.41
   1  18   7    0.16    0.47
   1  18   8   19.26    0.91
  -1  18  -8   17.89    1.07
   1  18   8   18.43    0.99
   1 -18   9   22.55    0.92
   1 -18   9   20.67    0.96
  -1 -19   8    0.17    0.32
  -1 -19   8    0.06    0.34
  -1 -19   7    0.66    0.47
  -1  19   7    0.63    0.39
  -1 -19   7    0.44    0.53
  -1  19   6    5.22    0.63
  -1  19   6    6.38    0.78
   1  19  -5   14.87    1.00
  -1 -19   5   15.97    1.32
  -1  19   5   14.28    1.20
  -1 -19   4   56.37    2.51
  -1  19   4   53.47    2.31
   1  19  -4   57.80    2.37
  -1  19   4   50.29    2.38
  -1 -19   3    4.86    0.89
  -1  19   3    6.63    0.97
  -1  19   3    6.90    1.00
  -1  19   2    5.01    0.93
  -1 -19   2    5.24    0.86
   1  19  -2    5.19    0.72
  -1  19   1   19.53    1.61
   1  19  -1   17.86    1.35
   1  19   0   -0.21    0.54
  -1  19   0    0.35    0.74
   1  19   1   18.88    1.46
   1 -19   2   24.49    1.46
  -1  19  -2   24.84    1.76
   1 -19   3    4.38    0.74
  -1  19  -3    4.49    0.90
  -1  19  -4    0.38    0.55
   1  19   4    1.00    0.62
   1 -19   4    0.36    0.49
   1 -19   5    8.70    0.92
  -1  19  -5   10.53    0.89
   1  19   5    9.81    1.00
   1  19   6   37.39    1.35
   1 -19   6   35.92    1.68
   1  19   6   38.27    1.71
   1 -19   7    1.63    0.45
  -1  19  -7    1.95    0.51
   1  19   7    2.05    0.38
   1  19   7    1.89    0.43
  -1 -20   7    0.65    0.33
  -1 -20   6    6.33    0.70
  -1  20   6    6.79    0.63
  -1 -20   5    4.44    0.68
  -1  20   5    4.28    0.67
   1  20  -4   -0.09    0.42
  -1 -20   4   -0.38    0.49
  -1  20   4   -0.09    0.44
   1  20  -3    0.77    0.52
  -1  20   3    1.07    0.56
  -1 -20   3    1.26    0.57
  -1  20   2   -0.13    0.51
  -1 -20   2   -0.06    0.45
   1  20  -1    0.87    0.49
  -1  20   1    1.21    0.66
  -1 -20   1    1.27    0.51
  -1 -20   0    0.14    0.37
   1  20   0    0.23    0.49
  -1  20   0    0.07    0.54
   1  20   1   11.23    1.10
   1  20   2   14.19    1.19
  -1  20  -2   12.21    1.18
   1 -20   3   15.82    1.02
  -1  20  -3   15.98    1.24
   1  20   4    4.43    0.72
   1 -20   4    4.84    0.64
  -1  20  -4    4.87    0.67
   1  20   5   27.14    1.38
   1 -20   5   26.84    1.27
  -1  20  -5   23.46    1.04
   1  20   6   17.99    0.97
  -1  20  -7   15.14    0.76
  -1 -21   6   20.04    0.84
  -1 -21   5   38.73    1.42
  -1  21   5   36.83    1.41
  -1  21   4   30.04    1.42
  -1 -21   4   29.03    1.29
  -1 -21   3    7.44    0.70
   1  21  -3    6.26    0.68
  -1  21   3    7.03    0.71
   1  21  -2    4.97    0.73
  -1  21   2    3.99    0.65
  -1 -21   2    4.10    0.56
  -1 -21   1    9.84    0.72
  -1  21   1   10.37    0.97
  -1  21   0   63.69    2.47
  -1  21  -1  107.08    3.10
   1  21   1  104.41    3.08
   1  21   2   12.28    0.97
  -1  21  -2   11.25    0.97
   1  21   3    4.27    0.61
  -1  21  -3    4.18    0.62
   1  21   4    0.27    0.32
  -1  21  -4    0.28    0.31
   1  21   4    0.11    0.36
   1  21   5    2.88    0.43
  -1  21  -5    2.72    0.47
  -1  22   4    7.40    0.52
  -1  22   3    2.28    0.34
  -1  22   3    2.89    0.45
  -1  22   2    8.43    0.69
   1  22  -2   10.01    0.72
  -1  22   1   -0.08    0.36
   1  22  -1    0.26    0.36
  -1  22   1    0.11    0.37
  -1  22   0    0.20    0.38
  -1  22   0    0.39    0.34
   1  22   1    2.36    0.50
  -1  22  -1    2.14    0.34
   1  22   2    3.22    0.48
  -1  22  -2    2.60    0.45
   1  22   3    0.62    0.26
  -2   0  15    6.02    0.54
  -2   0  14   -0.12    0.62
  -2   0  14   -0.28    0.54
  -2   0  13    0.92    0.73
  -2   0  13    0.67    0.76
  -2   0  13    0.43    0.72
  -2   0  13    1.01    0.72
  -2   0  12   76.03    3.27
  -2   0  12   73.97    3.30
  -2   0  12   78.72    3.27
  -2   0  12   79.68    3.53
  -2   0  11    5.57    1.11
   2   0 -11    2.82    1.13
  -2   0  11    5.27    1.15
  -2   0  11    5.10    1.07
  -2   0  11    4.29    1.10
  -2   0  10  280.93    7.44
  -2   0  10  268.52    7.42
  -2   0  10  266.85    7.62
  -2   0  10  275.45    7.31
  -2   0   9    1.82    0.74
  -2   0   9    0.62    0.72
  -2   0   9    0.17    0.75
  -2   0   9    1.04    0.80
  -2   0   8    1.22    0.87
  -2   0   8    0.07    0.57
  -2   0   8    0.07    0.62
  -2   0   8    0.29    0.65
  -2   0   8    0.73    0.72
  -2   0   7  252.89    7.74
   2   0  -7  237.45    6.35
  -2   0   6   52.32    2.92
  -2   0   5  360.26    7.70
  -2   0   5  368.24    9.17
  -2   0   4   72.35    3.02
  -2   0   4   71.85    2.41
  -2   0   3 3594.41   66.21
   2   0  -3 3740.27   66.04
   2   0  -2   38.75    1.54
  -2   0   2   36.36    0.92
  -2   0   2   36.92    1.70
   2   0  -2   36.36    1.17
   2   0  -2   39.21    1.28
  -2   0   2   38.44    1.76
   2   0  -1 2733.96   47.83
  -2   0   1 2733.38   48.36
  -2   0   1 2707.77   48.32
  -2   0   1 2687.05   47.99
  -2   0   1 2643.29   49.20
  -2   0   1 2675.43   48.88
   2   0  -1 2530.34   48.79
   2   0  -1 2734.80   48.26
   2   0   0 8152.10  139.93
  -2   0   0 7757.48  140.09
   2   0   0 7583.01  140.31
  -2   0   0 8166.18  140.22
  -2   0   0 7855.54  139.66
  -2   0   0 7487.80  140.58
  -2   0   0 8076.20  139.94
  -2   0  -1 9999.00  172.04
  -2   0  -1 9675.46  172.67
  -2   0  -1 9699.15  172.40
  -2   0  -1 9514.86  173.25
   2   0   1 9450.56  172.86
  -2   0  -2 3702.92   66.01
  -2   0  -2 3640.39   64.80
   2   0   2 3653.14   65.97
   2   0   2 3613.30   65.52
   2   0   3   64.90    2.57
  -2   0  -3   60.69    1.41
  -2   0  -3   68.72    2.41
   2   0   3   66.17    2.57
   2   0   3   66.34    2.02
   2   0   4    5.48    0.87
  -2   0  -4    7.07    0.76
   2   0   4    5.02    0.83
   2   0   5  118.14    4.25
   2   0   5  116.78    4.13
  -2   0  -5  115.23    3.21
   2   0   6 1099.22   22.46
  -2   0  -6 1071.61   23.24
   2   0   7   14.67    1.38
   2   0   7   12.74    1.27
  -2   0  -7   15.10    1.91
   2   0   7   14.29    1.57
   2   0   7   15.20    1.35
   2   0   7   15.90    1.38
   2   0   8  102.66    3.92
  -2   0  -8   97.57    4.94
   2   0   8   95.50    3.78
   2   0   8  101.74    4.54
   2   0   8   99.94    3.81
   2   0   8  101.97    3.89
   2   0   9   75.20    3.42
  -2   0  -9   75.08    4.39
   2   0   9   71.62    3.34
   2   0   9   75.85    3.44
   2   0   9   80.47    2.91
   2   0   9   77.49    3.48
  -2   0 -10    4.03    1.20
   2   0  10    4.46    1.17
   2   0  10    2.85    0.91
   2   0  10    4.34    0.83
   2   0  10    3.59    1.06
   2   0  11  107.16    4.11
   2   0  11  103.55    4.11
  -2   0 -11  101.88    5.81
   2   0  11  111.10    4.23
   2   0  12   47.45    2.51
   2   0  12   50.21    2.46
   2   0  12   47.53    2.52
   2   0  13    3.80    0.83
   2   0  13    4.24    0.80
   2   0  14    6.04    0.54
   2   0  14    7.30    0.73
  -2   1  15    1.33    0.38
  -2  -1  15    0.44    0.30
  -2  -1  14   43.41    1.98
  -2   1  14   43.72    1.87
  -2   1  14   43.38    1.92
  -2   1  14   42.49    2.00
  -2  -1  14   42.16    1.99
  -2   1  13   28.29    1.81
  -2   1  13   28.60    1.79
  -2  -1  13   24.73    1.81
  -2  -1  13   25.45    1.73
  -2  -1  13   28.63    1.87
  -2   1  13   26.47    1.87
  -2  -1  13   25.61    1.69
  -2   1  13   25.70    1.75
  -2  -1  12   17.28    1.63
  -2   1  12   15.07    1.45
  -2  -1  12   15.28    1.47
  -2   1  12   15.21    1.62
  -2  -1  12   15.65    1.51
  -2   1  12   15.45    1.54
  -2  -1  12   14.71    1.56
  -2   1  12   15.24    1.56
  -2   1  11   21.37    1.76
  -2   1  11   22.48    1.80
  -2  -1  11   19.42    1.72
   2   1 -11   16.40    2.17
  -2  -1  11   22.82    1.87
  -2  -1  11   18.82    1.74
  -2  -1  11   22.02    1.94
  -2   1  11   26.90    2.11
  -2   1  11   21.93    1.86
  -2  -1  10   73.96    3.26
  -2   1  10   72.18    2.83
  -2   1  10   72.90    3.43
  -2   1  10   73.48    3.18
  -2  -1  10   69.25    3.10
   2   1 -10   68.11    4.20
  -2  -1  10   69.19    3.14
  -2  -1  10   68.84    3.35
  -2   1  10   68.76    3.21
  -2   1  10   76.63    3.24
  -2   1   9   -0.17    0.87
  -2  -1   9    0.08    0.66
  -2   1   9    0.15    0.66
  -2  -1   9    0.31    0.65
  -2   1   9    0.49    0.68
  -2  -1   9    0.34    0.64
  -2   1   9    0.19    0.78
  -2  -1   9    0.09    0.72
  -2   1   9    0.34    0.71
  -2   1   9   -0.20    0.67
  -2   1   8   46.37    2.20
  -2  -1   8   44.40    2.20
  -2   1   8   36.58    2.86
  -2  -1   8   44.07    2.31
  -2  -1   8   45.83    2.22
  -2  -1   8   41.52    2.04
  -2   1   8   45.83    2.19
  -2   1   8   42.72    2.02
  -2   1   8   44.20    2.25
  -2   1   8   45.16    2.35
  -2  -1   7    4.55    1.12
  -2   1   7    3.20    1.00
  -2  -1   7    3.42    0.74
   2   1  -7    4.71    0.75
  -2  -1   6   41.43    2.59
   2   1  -6   39.14    2.04
  -2   1   6   37.48    2.50
  -2  -1   5   63.31    3.01
  -2   1   5   57.95    2.10
  -2  -1   5   61.28    2.10
  -2   1   5   60.55    2.98
  -2   1   4  396.75    9.40
  -2   1   4  389.00    8.43
  -2  -1   4  404.90    9.41
  -2  -1   4  400.34    8.49
  -2  -1   3   39.00    1.77
   2  -1  -3   42.03    1.67
   2   1  -3   41.53    1.65
   2   1  -3   40.91    1.51
  -2   1   3   41.98    1.78
  -2   1   2   34.52    1.71
  -2   1   2   33.58    1.03
   2  -1  -2   32.21    0.93
  -2  -1   2   35.90    1.69
   2   1  -2   34.48    1.35
  -2  -1   2   34.82    1.32
  -2  -1   2   32.41    0.79
  -2  -1   2   33.87    1.68
  -2   1   2   30.44    1.59
   2   1  -2   36.57    1.33
   2  -1  -2   35.99    1.40
  -2   1   2   35.55    1.51
   2  -1  -2   36.33    1.58
   2   1  -2   32.68    0.92
  -2  -1   1 2620.29   47.01
  -2  -1   1 2587.32   47.23
   2  -1  -1 2706.14   47.23
  -2   1   1 2624.40   46.56
  -2  -1   1 2595.26   46.53
  -2  -1   1 2634.48   47.42
  -2   1   1 2510.22   47.31
   2  -1  -1 2470.94   46.79
   2   1  -1 2588.11   46.41
  -2   1   1 2548.85   46.82
   2   1  -1 2612.22   46.03
   2   1  -1 2620.22   46.75
  -2   1   1 2557.47   47.11
   2   1   0   47.11    1.48
   2   1   0   42.63    1.65
  -2   1   0   46.31    1.63
  -2   1   0   44.00    1.14
  -2  -1   0   45.98    1.59
  -2   1   0   43.22    1.68
  -2  -1   0   41.90    1.70
  -2  -1   0   43.52    1.94
  -2  -1   0   46.15    1.51
   2  -1   0   42.20    1.63
   2   1   0   41.17    1.82
   2   1   0   44.91    1.39
  -2   1   0   39.12    1.82
  -2  -1   0   45.41    1.26
  -2  -1  -1   34.05    1.40
  -2   1  -1   37.12    1.24
  -2  -1  -1   32.03    1.67
  -2  -1  -1   35.64    1.56
  -2   1  -1   35.76    1.68
   2   1   1   32.52    1.54
   2   1   1   35.32    1.61
  -2   1  -1   36.59    1.71
   2  -1   1   38.43    1.66
   2  -1   2 2144.72   39.38
  -2   1  -2 2126.03   37.89
  -2  -1  -2 2143.14   39.34
  -2   1  -2 2158.21   39.20
  -2  -1  -2 2084.92   38.46
  -2   1  -2 2132.24   39.62
   2   1   2 2141.85   38.91
   2  -1   2 2142.80   39.43
  -2   1  -3   50.24    2.41
   2  -1   3   48.61    2.20
  -2  -1  -3   49.19    1.56
   2  -1   3   47.08    2.06
  -2  -1  -3   46.64    2.04
  -2   1  -3   48.39    1.96
   2   1   3   45.67    1.73
   2  -1   3   47.53    1.64
   2  -1   4   13.30    1.15
   2  -1   4   13.72    1.26
   2   1   4   14.41    1.27
  -2   1  -4   14.04    1.48
  -2   1  -4   13.91    0.98
  -2  -1  -4   14.11    1.08
   2   1   4   13.97    1.28
   2  -1   5  218.68    6.23
  -2   1  -5  205.68    4.88
  -2  -1  -5  219.00    5.27
   2  -1   5  211.87    5.97
   2   1   5  229.22    6.32
  -2   1  -6  408.40   11.15
  -2  -1  -6  412.51   11.19
   2   1   6  439.11   10.72
   2  -1   6  438.50   10.44
   2   1   7   18.19    1.49
   2  -1   7   14.84    1.38
   2  -1   7   18.55    1.73
   2   1   7   16.99    1.42
   2  -1   7   17.72    1.46
  -2   1  -7   17.11    1.97
   2  -1   7   17.39    1.48
   2   1   7   16.92    1.73
  -2  -1  -7   18.49    2.09
   2   1   7   20.31    1.53
   2   1   7   16.51    1.46
   2   1   8    7.10    1.19
   2  -1   8    8.02    1.15
   2   1   8    7.93    1.17
  -2  -1  -8    6.51    1.45
  -2   1  -8    8.05    1.49
   2   1   8    9.08    1.20
   2  -1   8    8.64    1.23
   2   1   8    6.77    1.29
   2  -1   8    7.59    1.15
   2  -1   8    8.96    1.24
   2   1   8    9.42    1.27
   2   1   9    0.60    0.84
   2  -1   9    0.10    0.76
   2   1   9    0.40    0.76
   2  -1   9    0.74    0.81
  -2  -1  -9   -0.19    0.94
  -2   1  -9    0.37    0.82
   2   1   9    0.10    0.66
   2  -1   9    0.10    0.82
   2   1   9    1.39    0.73
   2   1   9    0.39    0.78
   2  -1   9    0.50    0.87
  -2  -1 -10   97.34    5.11
   2   1  10   97.25    4.03
  -2   1 -10   98.48    5.06
   2  -1  10  100.22    4.10
  -2  -1 -10  103.03    5.85
   2   1  10  103.50    4.16
   2   1  10  103.20    3.47
   2   1  10  106.39    4.17
   2  -1  10  103.43    4.18
   2  -1  10  100.34    4.12
   2  -1  10   96.37    3.99
   2   1  11   34.20    2.23
   2   1  11   38.28    1.86
   2   1  11   36.11    2.37
   2  -1  11   31.78    2.16
  -2  -1 -11   33.27    3.32
   2   1  11   32.15    2.23
   2  -1  11   36.00    2.35
   2  -1  12   22.14    1.74
   2   1  12   26.13    1.88
   2   1  12   20.79    1.57
   2  -1  12   22.88    1.66
   2   1  12   21.52    1.71
   2  -1  13   17.80    1.20
   2   1  13   16.24    1.33
   2  -1  13   14.72    1.23
   2   1  13   14.14    1.19
   2  -1  14    5.84    0.54
   2   1  14    6.60    0.73
  -2  -2  14   30.93    1.66
  -2   2  14   28.95    1.51
  -2  -2  14   27.84    1.60
  -2   2  14   27.54    1.60
  -2  -2  13    0.32    0.65
  -2   2  13    0.29    0.65
  -2   2  13   -0.37    0.81
  -2   2  13   -0.07    0.68
  -2  -2  13   -0.13    0.70
  -2   2  13   -0.33    0.81
  -2  -2  13    0.33    0.74
  -2  -2  12    0.47    0.83
  -2   2  12   -0.56    0.77
  -2   2  12    0.17    0.75
  -2  -2  12    0.30    0.79
  -2   2  12    0.24    0.73
  -2   2  12    0.80    0.87
  -2   2  12   -0.18    0.90
  -2  -2  12    0.24    0.72
  -2  -2  11   15.57    1.58
  -2  -2  11   16.65    1.68
  -2   2  11   15.87    1.35
  -2  -2  11   17.97    1.60
  -2   2  11   17.55    1.58
  -2   2  11   18.54    1.66
  -2   2  11   15.11    1.60
  -2   2  11   19.33    1.88
   2   2 -11   17.89    2.26
  -2  -2  10   95.89    3.99
   2   2 -10   92.86    4.98
  -2   2  10   99.65    3.73
  -2   2  10   97.17    3.94
  -2   2  10  100.66    3.78
  -2  -2  10   96.84    3.88
  -2   2  10   96.16    3.47
  -2   2  10   96.41    4.01
  -2  -2  10   95.64    3.73
  -2   2   9   39.40    3.06
  -2  -2   9   44.42    2.17
   2   2  -9   40.70    3.08
  -2   2   9   40.58    2.21
  -2   2   9   41.10    2.43
  -2   2   9   37.81    2.04
  -2   2   9   41.94    2.21
  -2  -2   9   38.86    2.19
  -2   2   9   39.12    2.31
  -2  -2   9   43.36    2.48
  -2  -2   9   40.06    2.29
  -2   2   8   51.51    3.34
  -2   2   8   55.57    2.45
  -2  -2   8   55.04    2.40
   2   2  -8   55.05    3.33
  -2   2   8   54.84    2.62
  -2  -2   8   48.67    2.49
  -2   2   8   56.78    2.37
  -2   2   8   54.50    2.39
  -2   2   8   49.22    2.46
  -2  -2   8   55.30    2.52
  -2  -2   7    2.16    0.69
  -2   2   7    2.33    0.65
  -2   2   7    1.90    0.94
  -2  -2   7    2.20    0.69
   2   2  -7    1.96    0.55
   2   2  -6    5.56    0.85
  -2  -2   6    5.48    1.12
  -2   2   5  171.04    5.51
   2   2  -5  174.42    5.09
  -2  -2   5  164.46    5.41
  -2  -2   5  167.78    4.25
  -2   2   5  168.80    4.36
   2   2  -5  166.33    4.84
   2   2  -4  476.80   10.31
   2   2  -4  469.04    9.31
  -2   2   4  474.27   10.96
  -2   2   4  475.98    9.93
  -2  -2   4  464.17    9.93
   2   2  -4  485.25   10.43
  -2  -2   4  482.29   10.90
   2   2  -3  232.26    4.51
   2   2  -3  243.04    5.65
  -2  -2   3  230.73    6.08
   2  -2  -3  238.72    5.69
   2   2  -3  232.41    5.92
  -2  -2   3  228.51    5.67
  -2   2   3  229.33    5.63
   2   2  -3  245.12    4.97
   2  -2  -2  230.11    5.20
  -2  -2   2  224.18    5.08
  -2  -2   2  231.71    5.48
   2  -2  -2  224.45    5.37
  -2   2   2  221.22    4.62
  -2   2   2  221.92    5.29
   2  -2  -2  199.79    4.03
  -2  -2   2  230.15    5.45
  -2   2   2  206.36    5.21
   2   2  -2  234.34    5.12
   2   2  -2  225.25    4.58
  -2   2   1 3005.30   53.68
  -2   2   1 2952.87   53.80
  -2  -2   1 3018.49   53.60
   2   2  -1 2920.24   53.03
   2   2  -1 2958.94   53.26
  -2   2   1 2994.83   53.22
  -2  -2   1 2899.22   53.85
  -2  -2   1 2946.01   53.42
  -2   2   1 2979.60   53.80
   2   2  -1 2982.16   53.97
   2  -2  -1 2925.11   53.68
   2   2   0 6674.31  119.39
  -2   2   0 6711.36  119.69
   2   2   0 6665.07  119.48
  -2  -2   0 6739.06  119.82
   2   2   0 6792.86  120.02
  -2   2   0 6763.59  119.58
  -2  -2   0 6575.68  119.69
   2  -2   0 6876.39  119.80
  -2   2  -1 4251.36   75.28
   2  -2   1 4226.97   76.04
  -2  -2  -1 4305.01   75.89
   2   2   1 4158.63   75.83
   2   2   1 4198.75   75.68
  -2  -2  -1 4125.87   75.59
   2  -2   1 4278.23   75.94
  -2   2  -1 4206.79   75.85
  -2   2  -1 4183.63   75.96
   2   2   1 4215.96   75.63
   2   2   2 1469.83   27.66
   2  -2   2 1512.01   28.16
  -2   2  -2 1411.15   28.26
   2  -2   2 1517.51   27.62
  -2  -2  -2 1445.33   28.13
  -2   2  -2 1510.44   27.79
   2  -2   2 1485.04   28.22
  -2   2  -2 1476.85   27.01
   2   2   2 1507.82   27.93
  -2   2  -3  552.37   11.99
  -2  -2  -3  532.32   11.91
   2   2   3  531.08   10.92
   2  -2   3  543.03   11.16
  -2  -2  -3  517.79   11.38
  -2   2  -3  546.26   11.04
   2  -2   3  544.50   11.67
  -2   2  -3  541.22   10.27
   2  -2   4  388.97    8.67
  -2   2  -4  367.41    9.46
   2   2   4  381.51    8.08
  -2  -2  -4  387.52    8.65
  -2   2  -4  377.72    8.11
   2  -2   4  386.73    9.11
  -2   2  -5   23.78    1.15
  -2  -2  -5   25.14    1.47
   2  -2   5   26.15    1.69
   2  -2   5   25.45    1.82
  -2   2  -6  284.64    8.40
   2  -2   6  272.38    7.40
   2  -2   6  280.60    7.83
   2  -2   7   73.68    2.98
   2  -2   7   77.88    3.21
   2   2   7   76.03    3.03
   2  -2   7   70.85    3.35
  -2  -2  -7   78.83    4.22
   2   2   7   74.61    3.76
   2   2   7   73.65    3.11
   2   2   7   73.13    2.98
  -2   2  -7   78.16    4.12
   2  -2   7   74.03    3.05
   2   2   7   72.49    3.05
   2  -2   8   23.61    1.78
   2   2   8   30.88    2.02
  -2   2  -8   30.19    2.68
   2   2   8   29.47    1.99
   2  -2   8   25.38    1.91
  -2  -2  -8   33.16    2.87
   2   2   8   27.97    2.39
   2   2   8   27.87    1.94
   2  -2   8   28.48    2.01
   2  -2   8   28.85    1.99
  -2   2  -9   71.78    4.24
   2  -2   9   59.43    3.07
   2  -2   9   60.94    3.11
   2   2   9   65.80    3.17
   2   2   9   69.38    3.19
   2   2   9   63.43    2.74
   2   2   9   62.67    2.70
   2  -2   9   60.84    2.99
  -2  -2  -9   60.08    4.35
  -2  -2  -9   66.58    4.18
   2   2   9   63.82    3.11
   2  -2  10   61.03    3.11
  -2  -2 -10   55.13    3.79
   2  -2  10   56.66    2.93
  -2   2 -10   50.05    3.52
   2   2  10   58.09    3.01
   2   2  10   52.68    2.47
   2   2  10   63.22    2.63
  -2  -2 -10   60.54    4.46
   2   2  10   58.62    3.05
   2   2  10   61.42    3.08
   2  -2  10   58.02    3.08
   2   2  11    0.99    0.86
   2   2  11    0.95    0.80
   2  -2  11    0.60    0.71
   2   2  11    1.44    0.72
  -2  -2 -11    2.14    1.28
   2   2  11    0.97    0.92
   2  -2  11    0.91    0.82
   2  -2  12   21.62    1.62
   2  -2  12   21.88    1.69
   2   2  12   21.77    1.30
   2   2  12   21.67    1.66
   2   2  12   21.30    1.59
   2   2  12   20.90    1.69
   2  -2  13    1.49    0.67
   2  -2  13    1.49    0.54
   2   2  13    1.45    0.61
   2   2  13    1.86    0.68
   2   2  14    1.40    0.47
  -2   3  14   35.15    1.68
  -2  -3  14   32.86    1.70
  -2  -3  14   34.38    1.74
  -2   3  14   36.65    1.79
  -2  -3  13  108.38    3.77
  -2   3  13  111.35    3.55
  -2   3  13  102.66    3.50
  -2   3  13  106.71    3.82
  -2  -3  13  102.31    3.73
  -2   3  13  110.32    3.72
  -2  -3  12    2.03    0.90
  -2  -3  12    1.92    0.84
  -2  -3  12    1.36    0.77
  -2   3  12    1.95    0.83
  -2   3  12    1.41    0.75
  -2   3  12    1.35    0.75
  -2   3  12    1.39    0.97
  -2   3  12    2.19    0.89
  -2  -3  12    2.65    0.94
  -2   3  11   96.40    3.56
  -2  -3  11  102.33    4.15
  -2  -3  11   99.77    3.99
  -2  -3  11   98.42    3.75
  -2  -3  11  102.26    3.82
  -2   3  11  103.08    3.82
  -2   3  11  104.59    4.21
   2   3 -11   97.67    5.25
  -2   3  11  101.79    4.12
  -2   3  11   97.99    3.80
  -2   3  10    5.76    1.03
  -2   3  10    2.71    1.16
   2   3 -10    5.21    1.48
  -2  -3  10    4.51    1.13
  -2   3  10    4.88    1.16
  -2  -3  10    6.74    1.12
  -2   3  10    6.58    1.12
  -2  -3  10    5.68    1.10
  -2   3  10    5.62    1.03
  -2   3  10    4.80    1.13
  -2   3   9   29.42    1.88
  -2   3   9   33.50    2.83
  -2  -3   9   35.95    2.06
   2   3  -9   31.83    2.77
  -2   3   9   32.62    1.98
  -2   3   9   36.91    2.08
  -2  -3   9   34.82    2.14
  -2   3   9   31.42    2.12
  -2  -3   9   37.63    2.32
  -2   3   9   35.32    2.27
  -2  -3   9   35.37    1.98
  -2   3   8   17.76    1.35
  -2  -3   8   20.88    1.52
  -2   3   8   18.80    1.45
   2   3  -8   22.43    2.18
  -2   3   8   17.14    1.51
  -2   3   8   17.81    2.03
  -2  -3   8   20.03    1.60
  -2   3   8   19.18    1.39
  -2  -3   8   19.15    1.49
  -2  -3   8   20.01    1.46
  -2   3   8   20.26    1.64
  -2   3   8   21.58    1.51
  -2   3   7    3.36    1.06
  -2   3   7    2.55    0.68
   2   3  -7    3.35    0.98
  -2  -3   7    2.30    0.71
  -2   3   7    2.28    0.75
  -2   3   7    4.49    0.81
  -2  -3   7    2.57    0.67
   2   3  -6  226.34    6.69
  -2   3   6  215.33    6.90
   2   3  -6  220.60    5.87
   2   3  -5   87.93    3.16
  -2  -3   5   82.41    2.69
  -2   3   5   85.87    2.85
   2   3  -5   84.06    3.39
  -2   3   5   80.52    3.60
  -2   3   4   13.95    1.41
  -2   3   4   15.64    1.14
   2   3  -4   14.89    1.27
   2   3  -4   16.04    0.63
  -2  -3   4   15.71    1.15
   2   3  -4   16.22    1.30
  -2  -3   4   15.14    1.40
   2  -3  -3   80.06    2.86
  -2   3   3   68.88    2.95
  -2   3   3   72.82    2.66
  -2  -3   3   76.33    3.04
   2   3  -3   78.06    2.80
  -2  -3   3   78.83    2.78
   2   3  -3   77.03    1.69
  -2  -3   3   77.72    2.77
   2  -3  -3   78.47    2.19
   2   3  -3   83.53    2.93
   2   3  -2   60.17    1.47
  -2   3   2   60.13    2.27
   2   3  -2   61.97    2.27
  -2  -3   2   60.96    2.25
  -2   3   2   63.78    2.43
   2  -3  -2   54.72    1.27
  -2   3   2   60.53    1.94
   2  -3  -2   63.86    2.35
  -2  -3   2   56.87    2.46
   2   3  -1   30.17    1.62
   2  -3  -1   28.40    1.57
   2   3  -1   25.74    1.36
  -2   3   1   28.13    1.34
   2   3  -1   28.39    1.05
  -2  -3   1   26.92    1.43
  -2   3   1   27.81    1.52
  -2   3   1   27.71    1.53
  -2   3   1   28.26    1.54
   2   3   0  627.34   12.23
   2   3   0  586.13   11.73
  -2  -3   0  639.08   12.46
  -2   3   0  591.69   11.12
   2  -3   0  586.62   12.57
  -2  -3   0  610.92   12.45
  -2   3   0  613.81   12.23
  -2   3   0  612.56   12.24
   2   3   0  609.87   12.49
   2  -3   0  629.89   12.52
  -2   3  -1  825.99   16.87
  -2   3  -1  875.92   16.49
  -2  -3  -1  834.65   16.71
   2   3   1  853.87   16.48
  -2   3  -1  851.28   15.99
   2  -3   1  860.32   17.04
   2  -3   1  866.54   17.05
  -2  -3  -1  873.99   17.05
   2   3   1  861.02   16.84
   2   3   1  846.67   16.82
  -2   3  -1  849.30   16.74
   2  -3   2 1198.18   23.68
   2   3   2 1246.54   23.36
  -2   3  -2 1221.60   23.82
   2   3   2 1213.06   23.28
  -2   3  -2 1224.46   23.24
   2  -3   2 1221.45   22.86
  -2  -3  -2 1239.36   23.89
   2  -3   3    2.18    0.50
  -2   3  -3    1.39    0.51
  -2   3  -3    1.41    0.72
   2  -3   3    1.31    0.60
  -2  -3  -3    1.03    0.62
   2   3   3    2.15    0.67
   2   3   3    1.39    0.49
  -2   3  -4   10.20    0.84
  -2  -3  -4    8.57    1.22
   2  -3   4    9.75    1.15
   2   3   4    9.91    1.18
   2  -3   4    8.76    0.89
  -2   3  -4    6.62    1.11
   2   3   4    7.26    0.79
   2  -3   5   20.21    1.64
   2   3   5   14.99    1.50
   2  -3   5   17.52    1.35
  -2  -3  -5   17.07    1.30
  -2  -3  -5   17.29    1.81
   2   3   6  113.03    3.80
   2  -3   6  116.13    4.43
  -2   3  -6  116.53    4.88
   2  -3   6  110.44    3.96
  -2  -3  -6  110.72    5.04
   2  -3   6  111.21    3.68
  -2  -3  -7   13.63    1.95
   2  -3   7   13.30    1.25
  -2   3  -7   11.06    1.65
   2   3   7   13.83    1.34
   2   3   7   13.38    1.28
  -2   3  -7   12.36    1.16
   2   3   7   14.67    1.35
   2  -3   7   12.23    1.30
   2  -3   8   23.53    1.77
   2   3   8   30.27    2.04
  -2  -3  -8   30.49    2.77
  -2   3  -8   29.07    2.60
   2   3   8   31.25    1.86
   2  -3   8   32.29    2.16
   2   3   8   27.07    1.97
  -2  -3  -8   35.36    3.17
   2   3   8   27.19    1.97
   2  -3   8   25.96    1.97
   2   3   9   16.15    1.61
   2  -3   9   18.15    1.75
  -2  -3  -9   15.27    2.07
  -2   3  -9   19.19    2.20
   2   3   9   15.86    1.49
  -2  -3  -9   15.92    2.34
   2  -3   9   14.76    1.61
   2   3   9   14.34    1.30
   2   3   9   16.06    1.66
   2  -3   9   16.51    1.58
   2   3   9   15.17    1.59
   2   3  10   57.66    3.06
   2  -3  10   54.49    2.99
   2   3  10   57.61    2.55
   2  -3  10   56.38    3.06
   2   3  10   55.26    2.93
  -2   3 -10   52.91    3.58
   2   3  10   57.69    2.98
  -2  -3 -10   59.97    3.96
  -2  -3 -10   50.62    4.14
   2   3  10   59.33    2.62
   2  -3  10   56.85    2.88
   2  -3  11   27.06    2.01
   2   3  11   22.10    1.78
   2   3  11   28.78    1.72
   2   3  11   25.29    1.94
   2   3  11   25.74    1.99
   2  -3  11   24.07    1.96
   2  -3  12   16.22    1.42
   2   3  12   16.26    1.19
   2   3  12   18.00    1.55
   2  -3  12   16.95    1.56
   2   3  12   15.59    1.46
   2  -3  12   18.09    1.56
   2  -3  13   14.48    1.08
   2   3  13   14.91    1.22
   2  -3  13   14.05    1.16
   2  -3  13   14.71    1.25
   2   3  13   13.20    1.11
   2   3  14   24.11    1.12
   2  -3  14   28.03    1.27
  -2   4  14    1.69    0.62
  -2  -4  14    0.51    0.56
  -2  -4  14    0.90    0.58
  -2   4  14    1.46    0.65
  -2  -4  13   24.98    1.71
  -2   4  13   21.91    1.34
  -2  -4  13   24.24    1.56
  -2   4  13   23.55    1.71
  -2   4  13   22.24    1.62
  -2  -4  13   24.68    1.71
  -2   4  12   18.31    1.47
  -2   4  12   18.12    1.72
  -2   4  12   17.10    1.47
  -2   4  12   14.70    1.34
  -2  -4  12   14.50    1.44
  -2   4  12   17.39    1.61
  -2  -4  12   17.53    1.67
  -2  -4  12   16.09    1.55
  -2  -4  11   12.83    1.47
   2   4 -11   10.63    1.84
  -2  -4  11   14.62    1.45
  -2   4  11   12.85    1.62
  -2   4  11   12.30    1.36
  -2   4  11   13.03    1.39
  -2   4  11   12.96    1.61
  -2   4  11   13.59    1.39
  -2  -4  11   11.85    1.47
  -2  -4  10   99.15    4.04
  -2  -4  10   95.50    3.86
  -2  -4  10   98.64    3.54
  -2   4  10  100.91    5.10
  -2   4  10  101.86    3.71
  -2  -4  10   99.52    3.73
  -2   4  10  100.16    4.13
  -2   4  10  100.39    3.72
  -2   4  10   93.46    3.47
  -2   4  10   90.25    3.65
  -2   4  10   95.26    4.02
   2  -4 -10   97.54    4.94
   2   4 -10   92.61    5.10
  -2  -4   9   14.65    1.49
  -2   4   9   17.28    1.48
  -2   4   9   13.51    1.52
  -2   4   9   15.11    1.58
   2   4  -9   14.11    2.00
  -2   4   9   15.72    2.05
  -2  -4   9   16.37    1.39
  -2   4   9   15.91    1.50
  -2   4   9   16.46    1.42
  -2   4   9   14.15    1.36
  -2  -4   9   15.32    1.41
   2  -4  -9   13.86    1.82
  -2  -4   9   14.40    1.55
  -2   4   8    9.85    1.07
  -2   4   8    7.50    1.44
   2   4  -8    7.90    1.42
  -2  -4   8    9.48    1.08
  -2   4   8    8.98    1.02
  -2  -4   8    9.94    1.20
  -2   4   8    8.08    1.13
  -2  -4   8    9.92    1.16
  -2   4   8   10.21    1.14
  -2  -4   8   10.69    1.16
  -2   4   8   10.96    1.30
  -2   4   8    9.28    1.21
  -2  -4   7   84.82    3.09
  -2  -4   7   90.97    3.07
   2   4  -7   85.80    4.19
  -2  -4   7   87.13    3.25
  -2   4   7   83.91    3.06
  -2  -4   7   89.37    3.19
  -2   4   7   93.79    4.45
  -2   4   7   82.66    3.03
  -2   4   7   92.19    3.05
  -2   4   7   88.20    3.27
  -2   4   7   89.03    3.32
  -2   4   6  529.50   13.19
   2   4  -6  552.16   11.84
   2   4  -6  531.95   12.93
  -2   4   5  187.83    5.10
  -2   4   5  193.84    6.22
   2   4  -5  208.02    6.06
   2  -4  -5  190.34    5.32
   2   4  -5  202.49    5.46
  -2  -4   5  191.94    5.00
   2   4  -4  342.79    8.08
   2  -4  -4  347.14    8.44
   2   4  -4  343.98    8.40
   2  -4  -4  340.62    7.57
  -2  -4   4  334.18    7.81
  -2   4   4  337.81    7.78
  -2  -4   4  326.68    8.51
  -2   4   4  344.45    8.80
   2   4  -3  141.89    4.33
   2  -4  -3  144.36    4.42
  -2   4   3  146.15    4.13
   2  -4  -3  143.09    3.50
  -2   4   3  139.71    4.59
  -2  -4   3  146.67    4.61
  -2  -4   3  141.05    4.31
   2   4  -3  147.34    4.45
  -2   4   3  140.09    4.51
   2  -4  -2 1462.39   26.62
  -2  -4   2 1512.29   28.17
  -2   4   2 1510.76   27.62
  -2   4   2 1430.24   28.39
  -2   4   2 1455.81   28.01
  -2  -4   2 1469.52   28.49
   2  -4  -2 1517.19   28.29
   2   4  -2 1529.30   28.18
  -2   4   1  180.75    4.94
  -2   4   1  187.67    4.72
   2   4  -1  188.39    4.93
  -2   4   1  186.30    3.90
   2  -4  -1  186.06    5.15
   2   4  -1  183.49    5.05
  -2  -4   1  193.44    5.07
  -2   4   1  189.40    5.12
  -2   4   1  191.87    5.18
   2  -4  -1  202.33    5.28
  -2   4   0   24.41    1.47
   2   4   0   24.96    1.45
  -2   4   0   22.38    0.94
   2  -4   0   24.28    1.59
  -2   4   0   21.76    1.38
  -2  -4   0   24.00    1.51
  -2   4   0   21.39    1.48
   2   4   0   27.20    1.57
   2  -4   0   23.38    1.61
  -2  -4  -1 2552.33   46.82
  -2   4  -1 2608.24   46.32
  -2   4  -1 2496.78   45.61
   2   4   1 2530.69   46.62
  -2   4  -1 2488.71   46.56
  -2   4  -1 2470.53   46.30
   2  -4   1 2519.98   46.75
   2   4   1 2550.42   46.53
  -2  -4  -2    0.88    0.62
  -2   4  -2    1.24    0.46
   2   4   2    0.61    0.59
   2  -4   2    1.04    0.35
  -2   4  -2    1.78    0.69
   2  -4   2    1.13    0.65
  -2   4  -2    0.97    0.53
   2   4   2    1.57    0.61
   2   4   2    0.99    0.56
  -2   4  -3  766.18   15.20
  -2   4  -3  784.97   16.30
  -2  -4  -3  766.50   16.48
   2  -4   3  779.61   14.88
   2   4   3  754.87   15.96
   2   4   3  745.07   15.45
   2  -4   3  765.58   15.93
   2  -4   4    3.78    0.94
   2  -4   4    2.33    0.74
   2   4   4    3.52    0.81
  -2  -4  -4    3.29    0.93
   2  -4   4    4.07    0.63
  -2   4  -4    3.28    0.59
   2   4   4    3.40    0.68
  -2  -4  -5   80.18    4.00
   2  -4   5   76.99    2.86
   2   4   5   76.93    3.54
   2  -4   5   79.44    3.41
   2  -4   5   82.45    3.85
   2  -4   6   65.85    3.24
   2   4   6   64.91    2.59
   2  -4   6   66.50    2.83
  -2   4  -6   75.30    3.81
   2   4   6   70.51    2.87
   2   4   6   69.10    3.52
  -2  -4  -6   67.72    3.94
   2  -4   6   65.18    2.73
   2  -4   7  222.89    6.27
   2  -4   7  210.38    5.88
   2  -4   7  227.69    6.20
  -2   4  -7  223.18    7.61
  -2  -4  -7  237.14    8.39
   2   4   7  228.30    6.20
   2   4   7  222.18    6.24
   2   4   7  224.75    7.43
  -2   4  -7  201.76    5.81
   2   4   7  222.14    6.08
   2   4   7  220.75    5.91
   2  -4   8   79.92    3.32
   2   4   8   90.40    3.66
  -2   4  -8   87.00    4.58
   2   4   8   85.45    3.29
   2   4   8   81.46    4.34
  -2  -4  -8   89.45    5.16
   2  -4   8   85.83    3.65
   2   4   8   84.09    3.45
   2   4   8   91.83    3.64
   2  -4   9   18.43    1.61
   2   4   9   19.64    1.62
   2   4   9   16.94    1.66
   2   4   9   17.68    1.69
  -2   4  -9   18.67    2.19
   2  -4   9   15.91    1.68
  -2  -4  -9   13.61    2.05
  -2  -4  -9   21.21    2.65
   2  -4   9   19.92    1.82
   2   4   9   18.60    1.73
   2   4   9   19.33    1.51
   2  -4   9   17.27    1.77
  -2  -4 -10   16.04    2.38
   2  -4  10   15.86    1.55
   2   4  10   16.62    1.44
  -2   4 -10   13.13    2.17
   2  -4  10   18.37    1.80
  -2  -4 -10   14.01    2.02
  -2   4 -10   12.65    1.88
   2  -4  10   15.64    1.66
   2   4  10   15.96    1.68
   2   4  10   17.82    1.68
   2   4  10   14.89    1.66
   2  -4  10   16.84    1.71
   2   4  10   16.23    1.34
   2   4  11   85.80    3.17
   2  -4  11   86.10    3.69
   2   4  11   87.77    3.63
   2  -4  11   92.05    3.75
   2  -4  11   84.82    3.63
   2   4  11   89.55    3.61
   2  -4  12   13.45    1.31
   2   4  12   15.37    1.40
   2   4  12   13.51    1.34
   2  -4  12   14.26    1.43
   2   4  12   14.94    1.16
   2  -4  12   11.84    1.32
   2  -4  13    0.89    0.49
   2  -4  13    1.33    0.70
   2   4  13    0.15    0.54
   2   4  13    0.05    0.61
   2  -4  13    0.05    0.54
   2   4  14   -0.13    0.38
   2  -4  14    0.74    0.42
  -2   5  14   18.88    1.26
  -2  -5  14   13.98    1.05
  -2  -5  13   38.85    1.87
  -2   5  13   38.56    2.10
  -2  -5  13   33.57    1.96
  -2  -5  13   37.49    2.05
  -2   5  13   38.90    2.14
  -2   5  13   33.18    1.66
  -2  -5  12  138.27    4.69
  -2  -5  12  124.74    4.41
  -2   5  12  134.26    4.13
  -2  -5  12  128.82    4.17
  -2   5  12  125.35    4.12
  -2   5  12  134.12    4.56
  -2   5  12  130.61    4.15
  -2   5  12  131.48    4.65
  -2  -5  11    0.19    0.80
  -2   5  11    0.84    0.69
   2   5 -11    0.41    0.97
  -2   5  11    0.58    0.82
  -2   5  11    1.16    0.75
  -2   5  11    0.16    0.66
  -2  -5  11    0.24    0.70
  -2   5  11    0.82    1.01
   2  -5 -11    0.36    0.82
  -2   5  11    2.04    1.05
  -2  -5  11   -0.21    0.84
  -2   5  10   24.70    1.77
  -2   5  10   24.47    1.72
  -2  -5  10   21.41    1.94
  -2  -5  10   24.02    1.72
  -2  -5  10   23.57    1.91
   2   5 -10   27.48    2.80
  -2   5  10   29.86    2.23
  -2   5  10   23.22    2.49
  -2   5  10   19.86    1.78
  -2   5  10   25.61    2.11
  -2   5  10   23.77    1.74
  -2  -5  10   27.05    1.87
  -2   5   9  128.79    4.18
  -2   5   9  139.43    4.26
  -2  -5   9  137.20    4.32
  -2  -5   9  124.74    4.24
  -2   5   9  132.00    5.89
  -2   5   9  132.50    4.73
  -2   5   9  121.32    4.32
   2  -5  -9  123.01    5.43
  -2   5   9  125.09    4.27
  -2  -5   9  129.23    4.64
  -2  -5   9  119.87    4.36
   2   5  -9  122.49    5.86
  -2   5   9  134.62    4.77
  -2  -5   8   40.48    2.16
  -2   5   8   36.58    2.14
  -2   5   8   40.58    2.42
  -2  -5   8   46.29    2.20
  -2   5   8   39.31    3.06
  -2   5   8   38.29    2.12
  -2   5   8   44.23    2.11
  -2  -5   8   38.08    2.27
  -2   5   8   43.37    2.41
   2   5  -8   41.76    3.12
   2  -5  -8   38.97    2.75
  -2   5   7   74.61    4.05
  -2   5   7   82.59    2.79
  -2  -5   7   80.28    2.98
   2   5  -7   75.98    4.00
  -2   5   7   75.48    2.94
  -2   5   7   71.15    2.89
  -2  -5   7   73.09    3.01
   2  -5  -7   76.83    3.62
  -2  -5   7   79.74    2.83
  -2   5   7   72.38    3.05
  -2   5   7   74.34    3.08
  -2   5   6    0.69    0.83
   2   5  -6    0.39    0.53
   2   5  -6    0.25    0.73
   2  -5  -6    0.19    0.49
  -2  -5   5   61.23    3.13
   2   5  -5   66.15    3.23
  -2   5   5   69.52    3.51
  -2   5   5   60.30    2.62
   2  -5  -5   67.37    2.79
  -2  -5   5   60.67    2.48
   2   5  -5   67.83    2.82
   2  -5  -4    8.88    0.86
  -2  -5   4   10.87    1.33
  -2   5   4    8.84    1.01
   2   5  -4   10.54    1.27
   2   5  -4    9.90    1.09
   2  -5  -4    8.67    1.16
  -2   5   4    8.13    1.18
   2  -5  -3   46.36    2.42
   2  -5  -3   47.37    1.77
  -2  -5   3   51.07    2.47
   2   5  -3   49.18    2.33
   2   5  -3   50.91    2.51
  -2   5   3   46.64    2.20
  -2   5   3   52.71    2.64
  -2   5   3   52.73    2.70
  -2  -5   3   48.75    2.56
  -2   5   2  266.70    6.41
  -2  -5   2  252.32    6.80
   2   5  -2  257.98    6.62
  -2  -5   2  262.33    6.67
   2  -5  -2  267.00    6.74
  -2   5   2  264.24    6.20
   2  -5  -2  253.40    5.32
   2   5  -2  244.49    4.94
  -2   5   2  265.04    6.84
   2   5  -2  252.63    6.54
   2  -5  -2  269.24    6.77
   2  -5  -1  772.67   14.66
  -2   5   1  764.87   16.38
  -2   5   1  804.90   16.49
   2   5  -1  762.56   16.21
   2   5  -1  772.95   16.24
  -2   5   1  814.56   15.06
  -2   5   1  825.33   15.95
  -2   5   1  809.10   16.03
  -2  -5   1  835.62   16.46
   2  -5  -1  806.71   16.34
   2  -5  -1  811.02   16.54
  -2   5   0  605.56   13.02
  -2   5   0  622.77   12.87
  -2  -5   0  570.66   12.83
  -2   5   0  602.77   11.75
   2   5   0  591.90   12.80
   2  -5   0  608.36   13.01
  -2   5   0  598.34   12.68
  -2  -5   0  615.52   13.06
   2   5   0  613.98   12.85
  -2   5  -1  686.22   13.31
  -2   5  -1  670.07   14.06
   2   5   1  707.80   14.36
   2  -5   1  653.66   12.55
   2   5   1  691.59   14.11
  -2   5  -1  681.22   13.78
   2  -5   1  635.99   14.14
  -2  -5  -1  687.11   14.46
  -2  -5  -2  306.25    8.05
   2   5   2  307.80    7.60
   2   5   2  321.50    8.05
   2   5   2  315.06    7.62
  -2   5  -2  309.99    7.86
  -2   5  -2  329.72    7.39
   2  -5   2  306.02    6.34
   2  -5   2  322.85    7.81
  -2   5  -2  310.27    7.19
   2   5   3  413.26    9.60
  -2   5  -3  409.61    9.32
  -2  -5  -3  406.17   10.11
   2   5   3  400.99    9.29
  -2   5  -3  412.32    9.89
   2  -5   3  390.13    9.55
   2  -5   3  398.80    8.22
  -2   5  -3  411.48    8.94
   2  -5   3  397.96    9.98
   2  -5   4   19.39    1.60
  -2   5  -4   20.75    1.29
  -2   5  -4   21.62    1.69
   2  -5   4   21.89    1.87
  -2  -5  -4   16.26    1.73
   2   5   4   19.76    1.69
   2  -5   4   18.10    1.09
   2   5   4   20.71    1.48
   2  -5   5  246.58    7.19
  -2  -5  -5  261.25    8.22
   2  -5   5  258.67    7.90
   2   5   5  263.67    7.51
   2  -5   6   22.65    1.91
  -2   5  -6   24.37    2.21
   2   5   6   22.93    2.05
   2   5   6   22.81    1.60
   2   5   6   23.59    1.64
  -2  -5  -6   22.72    1.65
   2  -5   6   21.98    1.57
  -2  -5  -6   19.98    2.23
   2   5   6   21.04    1.45
   2  -5   7   22.45    1.54
  -2   5  -7   29.09    2.55
   2   5   7   24.03    2.22
  -2  -5  -7   22.75    2.54
   2  -5   7   23.79    1.80
  -2   5  -7   22.45    1.65
   2  -5   7   24.22    1.77
   2   5   7   23.93    1.79
   2   5   7   24.43    1.65
   2   5   7   21.08    1.61
   2   5   7   22.98    1.71
  -2   5  -8    4.50    0.88
   2   5   8    5.86    0.95
   2   5   8    6.99    1.12
   2  -5   8    5.42    0.97
  -2   5  -8    5.43    1.41
   2   5   8    6.09    1.06
  -2   5  -8    5.15    1.33
  -2  -5  -8    4.69    1.47
   2   5   8    5.36    1.30
   2   5   8    5.77    1.09
   2  -5   8    6.22    1.18
   2  -5   9   55.57    2.71
   2   5   9   62.40    3.08
   2  -5   9   58.82    3.11
  -2   5  -9   49.30    3.76
  -2  -5  -9   52.01    3.84
  -2   5  -9   56.17    3.71
   2   5   9   62.21    2.74
  -2  -5  -9   63.24    4.54
   2   5   9   62.00    3.03
   2   5   9   56.09    2.98
   2  -5   9   58.73    3.10
   2   5   9   56.07    2.64
   2  -5  10   29.76    2.22
   2   5  10   29.67    2.09
  -2  -5 -10   28.53    2.84
   2  -5  10   30.98    2.00
  -2   5 -10   27.25    2.54
  -2  -5 -10   33.09    3.33
   2  -5  10   30.41    2.25
   2   5  10   32.47    1.93
   2  -5  10   29.91    2.23
  -2   5 -10   33.50    3.12
   2   5  10   27.52    2.11
   2   5  10   26.85    1.74
   2  -5  11    5.64    1.07
   2   5  11    5.43    1.10
   2   5  11    6.25    1.01
   2   5  11    5.79    1.14
   2  -5  11    5.46    1.18
   2  -5  11    4.12    1.00
   2  -5  12   42.77    2.25
   2  -5  12   33.69    1.99
   2   5  12   37.07    2.05
   2   5  12   39.41    1.84
   2   5  12   37.44    2.05
   2  -5  12   39.32    2.15
   2   5  13   62.63    2.34
   2   5  13   67.26    2.08
   2  -5  13   66.56    2.31
   2  -5  13   66.44    2.40
   2  -5  13   72.76    2.59
   2  -5  14   -0.05    0.32
  -2   6  14   18.98    1.30
  -2  -6  14    2.52    0.55
  -2   6  13   10.67    1.20
  -2   6  13    8.92    0.94
  -2   6  13   10.27    1.16
  -2  -6  13    8.41    1.05
  -2  -6  12    1.21    0.70
  -2  -6  12    1.18    0.90
  -2   6  12    1.44    0.88
  -2   6  12    1.82    0.70
  -2   6  12    1.08    0.78
  -2   6  12    1.48    0.85
  -2   6  11   -0.15    0.65
  -2   6  11    0.08    0.68
   2  -6 -11    0.18    0.81
  -2  -6  11    0.15    0.62
   2   6 -11   -0.20    0.92
  -2   6  11   -0.14    0.65
  -2  -6  11   -0.10    0.87
  -2   6  11   -0.41    1.03
  -2   6  11   -0.08    0.76
  -2   6  11    0.64    0.82
  -2   6  10  258.33    6.74
  -2  -6  10  281.83    7.05
   2  -6 -10  263.98    9.19
  -2  -6  10  263.59    6.99
  -2   6  10  255.07    8.94
  -2   6  10  267.65    7.67
   2   6 -10  257.16    9.42
  -2   6  10  259.35    7.09
  -2   6  10  269.75    7.66
  -2   6  10  264.77    7.03
  -2  -6  10  272.18    7.65
  -2   6   9  167.25    6.85
  -2  -6   9  164.93    4.95
   2   6  -9  159.38    6.92
  -2   6   9  167.84    4.85
  -2  -6   9  168.50    5.13
  -2   6   9  168.79    5.54
  -2  -6   9  166.50    5.48
  -2   6   9  150.96    5.09
  -2   6   9  160.56    5.06
  -2   6   9  174.15    5.61
  -2   6   8  316.60    8.22
  -2  -6   8  332.34    8.58
  -2   6   8  340.03   10.53
  -2  -6   8  341.27    8.36
   2   6  -8  321.89   10.39
  -2   6   8  354.57    8.81
  -2  -6   8  344.05    8.05
   2  -6  -8  339.77    9.72
  -2   6   8  329.81    8.32
  -2   6   8  332.98    8.68
  -2   6   8  351.36    7.96
  -2  -6   7   23.39    1.45
   2   6  -7   25.61    2.40
  -2  -6   7   24.67    1.67
  -2   6   7   24.22    2.35
   2  -6  -7   22.81    1.94
  -2   6   7   20.06    1.58
  -2   6   7   22.55    1.71
  -2   6   7   24.15    1.68
  -2   6   7   22.26    1.74
  -2  -6   7   20.35    1.61
  -2   6   6  125.85    4.02
  -2   6   6  136.45    5.61
  -2  -6   6  145.40    4.27
   2   6  -6  157.65    5.81
  -2   6   6  142.47    4.43
   2  -6  -6  140.42    4.84
   2   6  -6  148.65    4.65
  -2   6   6  138.62    4.24
  -2  -6   5    9.15    1.33
  -2   6   5   10.72    1.53
   2  -6  -5    8.46    1.32
   2  -6  -5    9.99    1.06
   2   6  -5    9.86    1.42
  -2  -6   5    9.55    1.01
   2   6  -5    8.90    1.11
   2  -6  -4    1.90    0.81
  -2   6   4    2.24    0.90
   2   6  -4    1.72    0.77
   2  -6  -4    1.30    0.51
  -2  -6   4    0.65    0.73
  -2   6   4    2.30    0.73
   2   6  -4    1.91    0.72
  -2   6   3  533.68   12.65
  -2  -6   3  548.84   12.42
   2   6  -3  547.00   12.08
   2   6  -3  551.90   12.48
  -2   6   3  549.34   11.90
  -2  -6   3  513.36   12.45
  -2   6   3  546.52   12.63
   2  -6  -3  535.45   11.05
   2  -6  -3  553.87   12.52
   2   6  -2    1.22    0.70
  -2   6   2    1.12    0.69
  -2   6   2    1.46    0.49
  -2   6   2    1.17    0.57
   2  -6  -2    0.98    0.36
   2  -6  -2    1.02    0.62
   2  -6  -2    1.09    0.76
  -2   6   2    0.64    0.62
   2   6  -2    0.90    0.25
  -2  -6   2    1.48    0.65
  -2  -6   2    0.84    0.65
   2   6  -2    1.20    0.67
  -2   6   1    3.35    0.86
   2  -6  -1    3.43    0.45
  -2  -6   1    3.18    0.85
  -2   6   1    3.39    0.83
   2  -6  -1    2.85    0.80
  -2  -6   1    4.05    0.93
  -2   6   1    2.91    0.75
  -2   6   1    3.27    0.77
   2   6  -1    2.92    0.81
  -2   6   0  219.74    6.22
  -2  -6   0  224.22    5.10
  -2   6   0  230.34    5.40
   2   6   0  235.25    6.36
  -2   6   0  229.40    6.11
   2  -6   0  237.94    6.31
  -2   6   0  211.98    6.32
   2   6   0  232.98    6.27
  -2  -6   0  244.98    6.60
  -2   6  -1    2.87    0.58
  -2   6  -1    1.52    0.67
   2  -6   1    1.52    1.01
  -2  -6  -1    3.89    0.90
   2   6   1    1.35    0.68
  -2   6  -1    1.74    0.65
   2   6   1    1.37    0.68
  -2  -6  -2   96.35    3.95
  -2   6  -2  103.18    3.44
   2   6   2  103.29    3.71
  -2   6  -2  102.43    3.85
  -2   6  -2   98.10    3.37
   2   6   2   99.13    3.57
   2  -6   2  100.41    3.79
   2   6   2  100.57    3.97
   2  -6   2  101.95    3.97
  -2   6  -3   15.31    1.51
  -2  -6  -3   18.66    1.76
  -2   6  -3   17.49    1.45
  -2   6  -3   19.54    1.35
   2   6   3   15.59    1.42
   2   6   3   16.84    1.48
   2  -6   3   20.18    1.61
   2  -6   3   18.60    1.73
   2   6   4   23.79    1.71
  -2   6  -4   26.53    1.94
  -2  -6  -4   24.42    2.18
   2  -6   4   25.45    2.14
   2   6   4   22.59    1.79
   2  -6   4   24.09    1.85
  -2   6  -4   24.10    1.47
   2   6   5    2.35    0.63
  -2  -6  -5    2.80    1.04
   2  -6   5    2.80    1.03
  -2   6  -5    4.09    1.04
   2  -6   5    3.14    0.71
   2   6   5    2.96    0.74
   2   6   5    2.28    0.82
   2  -6   5    3.03    0.83
  -2   6  -5    3.39    1.03
   2   6   5    2.39    0.66
   2  -6   6   54.00    2.63
   2   6   6   58.20    2.52
   2  -6   6   57.03    3.04
  -2   6  -6   57.72    3.38
  -2   6  -6   55.26    3.38
  -2  -6  -6   59.26    3.85
   2   6   6   53.27    2.55
   2   6   6   57.66    3.29
   2   6   6   58.04    2.69
   2   6   6   55.83    2.43
   2   6   7  138.41    4.62
  -2   6  -7  132.87    5.78
   2   6   7  129.02    4.27
  -2   6  -7  131.94    5.67
  -2  -6  -7  141.32    6.48
   2   6   7  128.52    5.44
   2   6   7  133.83    4.32
   2  -6   7  125.63    4.47
   2   6   7  128.73    4.44
   2  -6   7  128.00    4.54
   2   6   8   54.40    2.85
   2  -6   8   52.09    2.75
   2   6   8   54.43    2.61
  -2  -6  -8   50.24    3.96
   2  -6   8   53.91    2.92
  -2   6  -8   53.91    3.57
  -2   6  -8   51.27    3.68
   2  -6   8   45.88    2.34
  -2   6  -8   47.08    2.49
   2   6   8   51.68    3.45
   2   6   8   53.54    2.68
   2   6   8   50.10    2.72
  -2   6  -9  523.15   14.82
  -2   6  -9  506.49   14.05
  -2  -6  -9  522.93   15.61
   2   6   9  528.83   12.40
   2   6   9  539.59   12.28
   2   6   9  537.81   11.93
   2  -6   9  551.01   12.77
   2   6   9  546.30   11.85
   2  -6   9  539.69   12.78
   2  -6   9  510.42   11.78
   2   6  10   60.58    2.69
  -2   6 -10   61.46    4.20
   2   6  10   64.07    3.02
  -2  -6 -10   69.52    4.73
  -2  -6 -10   59.74    4.03
  -2   6 -10   63.86    3.82
   2  -6  10   66.78    3.29
   2  -6  10   63.38    3.22
   2   6  10   67.61    3.20
   2   6  10   64.84    2.81
   2   6  10   62.80    2.69
   2  -6  10   57.97    3.13
   2  -6  10   61.86    2.74
   2  -6  11   76.14    3.39
   2   6  11   81.33    2.87
   2  -6  11   81.56    3.51
   2  -6  11   82.64    3.49
   2   6  11   85.79    3.11
   2   6  11   79.87    3.37
   2   6  11   78.77    3.26
   2  -6  12    4.63    0.85
   2   6  12    5.43    0.82
   2  -6  12    4.99    0.98
   2   6  12    3.60    0.84
   2   6  12    5.03    0.93
   2  -6  12    4.26    0.93
   2  -6  13    4.11    0.58
   2   6  13    4.16    0.60
   2   6  13    4.39    0.68
   2  -6  13    4.66    0.75
   2  -6  13    4.15    0.66
  -2  -7  14   22.00    1.22
  -2  -7  14   23.71    1.18
  -2  -7  13   20.49    1.42
  -2   7  13   16.01    1.17
  -2  -7  13   19.35    1.40
  -2  -7  12   15.02    1.40
  -2  -7  12   12.96    1.15
  -2   7  12   10.51    1.20
  -2   7  12   15.19    1.52
  -2   7  12   13.91    1.52
  -2   7  12   14.39    1.21
  -2  -7  12   11.37    1.31
  -2   7  11    4.39    0.83
  -2  -7  11    5.65    0.93
  -2  -7  11    4.80    0.85
  -2   7  11    4.42    0.96
  -2   7  11    5.48    1.21
  -2  -7  11    5.09    1.06
  -2  -7  11    5.17    1.10
  -2   7  11    4.43    1.01
  -2   7  11    6.44    1.25
   2  -7 -10  107.82    5.49
  -2  -7  10  104.43    4.08
  -2  -7  10  105.97    3.72
  -2   7  10  115.23    4.48
  -2  -7  10  107.63    3.89
  -2   7  10  110.16    4.00
  -2   7  10  104.49    3.94
   2   7 -10  111.92    5.82
  -2   7  10  106.03    4.33
  -2  -7  10  109.13    4.35
  -2   7   9  132.62    6.08
  -2  -7   9  139.19    4.32
  -2  -7   9  131.20    4.49
   2   7  -9  138.10    6.46
  -2   7   9  139.92    4.71
  -2   7   9  129.57    4.59
   2  -7  -9  134.72    6.20
  -2  -7   9  138.03    4.71
  -2   7   9  135.83    4.93
  -2   7   9  133.60    4.93
  -2  -7   9  138.72    4.91
  -2  -7   8    0.25    0.64
   2  -7  -8   -0.18    0.88
  -2  -7   8    1.46    0.83
  -2   7   8    0.56    0.89
  -2  -7   8    0.07    0.60
   2   7  -8    0.19    0.85
  -2   7   8    0.34    0.80
  -2   7   8    0.67    0.83
  -2   7   8    0.29    0.89
  -2   7   8   -0.30    0.85
  -2  -7   8    0.19    0.79
  -2  -7   7  362.94    8.58
  -2  -7   7  362.76    8.09
   2   7  -7  346.77   10.71
   2  -7  -7  342.47    9.50
   2  -7  -7  351.24   10.49
  -2  -7   7  365.63    8.63
  -2   7   7  348.95    8.62
  -2   7   7  354.17    8.91
  -2   7   7  340.30    8.44
  -2   7   7  357.27   10.76
  -2   7   7  353.34    8.85
  -2  -7   6   71.20    2.75
   2   7  -6   65.65    2.99
   2   7  -6   73.00    3.97
   2  -7  -6   63.26    3.08
   2  -7  -6   61.95    3.59
  -2   7   6   63.31    2.84
  -2  -7   6   66.65    2.73
  -2   7   6   61.33    2.68
  -2   7   6   64.02    2.86
  -2   7   6   67.51    3.92
  -2   7   5    1.16    0.82
   2  -7  -5    0.39    0.77
   2   7  -5    1.23    0.89
  -2  -7   5    0.51    0.68
   2  -7  -5    1.44    0.62
   2   7  -5    1.22    0.62
   2  -7  -4  552.99   13.31
  -2  -7   4  566.89   13.35
   2   7  -4  592.24   13.64
  -2   7   4  538.18   13.64
   2   7  -4  574.44   12.73
  -2  -7   4  533.39   13.20
   2  -7  -4  553.15   11.97
  -2   7   3  642.83   14.82
  -2  -7   3  649.78   14.58
   2  -7  -3  639.21   14.37
  -2   7   3  646.47   14.74
  -2   7   3  632.18   13.84
   2  -7  -3  633.26   14.52
   2   7  -3  655.76   14.13
  -2  -7   3  653.63   14.67
   2  -7  -3  606.35   12.94
   2   7  -3  650.36   14.59
  -2  -7   2  205.66    6.27
  -2   7   2  207.05    5.82
   2   7  -2  210.13    6.24
  -2   7   2  200.03    5.21
  -2  -7   2  196.16    6.13
   2  -7  -2  207.15    6.13
  -2   7   2  202.22    5.79
   2  -7  -2  191.25    4.85
  -2   7   2  201.55    6.25
   2   7  -2  204.94    5.97
  -2   7   1   23.23    1.67
  -2   7   1   25.15    1.76
   2  -7  -1   24.28    1.25
   2   7  -1   23.94    1.85
   2  -7  -1   23.43    1.77
  -2   7   1   20.64    1.78
  -2  -7   1   21.87    1.78
  -2  -7   1   23.68    1.90
  -2   7   1   22.84    1.85
   2   7   0    7.46    1.07
  -2   7   0    5.83    0.75
   2   7   0    8.60    1.16
  -2   7   0    5.83    0.95
  -2  -7   0    6.44    1.11
   2  -7   0    6.28    1.02
  -2   7   0    6.66    1.12
  -2   7   0    5.76    1.08
  -2  -7   0    5.95    0.66
  -2   7  -1   93.61    3.63
  -2  -7  -1   87.89    3.79
  -2   7  -1   87.49    3.06
   2   7   1   92.47    3.62
   2   7   1   79.06    3.57
  -2   7  -1   88.56    3.31
   2  -7   1   80.97    3.56
   2  -7   1   87.54    3.70
  -2   7  -2  128.39    4.15
   2   7   2  127.69    4.28
   2  -7   2  124.97    4.45
   2  -7   2  122.82    4.67
  -2   7  -2  130.49    4.61
  -2  -7  -2  135.51    4.95
   2   7   2  121.28    4.40
   2   7   2  121.20    4.70
  -2   7  -2  125.85    4.11
  -2   7  -3  110.82    4.15
  -2  -7  -3  119.87    4.88
  -2   7  -3  120.73    4.62
   2  -7   3  116.85    4.29
   2   7   3  119.90    4.24
   2   7   3  119.08    4.32
  -2   7  -3  118.00    3.90
   2  -7   3  124.51    4.81
  -2  -7  -4   77.42    4.01
   2  -7   4   76.57    3.41
  -2   7  -4   71.59    3.40
   2   7   4   78.48    3.48
   2   7   4   74.28    3.29
   2  -7   4   75.54    3.84
   2  -7   5   96.83    3.51
   2  -7   5  103.27    4.11
  -2   7  -5   88.56    4.16
   2  -7   5  103.05    4.79
  -2   7  -5  101.91    4.58
   2   7   5   96.71    3.78
  -2  -7  -5   95.36    4.79
   2   7   5   92.41    4.09
   2   7   5   97.65    3.39
   2  -7   6   95.40    3.67
   2  -7   6  106.02    4.28
   2   7   6   95.81    4.42
  -2   7  -6   93.70    4.58
  -2   7  -6   94.00    4.60
  -2  -7  -6   96.79    5.14
   2  -7   6  101.38    4.93
   2   7   6   96.32    3.39
   2   7   6  101.29    3.58
   2   7   6  100.70    3.67
  -2   7  -7  176.49    6.74
  -2   7  -7  171.22    6.78
   2   7   7  163.42    5.04
   2   7   7  176.11    6.50
  -2  -7  -7  175.27    7.45
   2  -7   7  163.19    5.40
   2   7   7  167.41    5.29
   2   7   7  164.78    5.10
  -2   7  -8    2.83    0.89
   2  -7   8    4.51    1.06
   2   7   8    4.79    1.29
  -2   7  -8    4.28    1.33
  -2   7  -8    3.35    1.18
  -2  -7  -8    5.13    1.57
   2  -7   8    3.15    1.02
   2   7   8    3.52    0.95
   2   7   8    3.99    0.96
   2   7   8    3.96    1.04
   2   7   8    3.97    0.90
   2  -7   9   38.34    2.55
  -2  -7  -9   37.89    3.53
  -2   7  -9   38.48    3.33
  -2   7  -9   34.91    2.94
   2   7   9   40.86    2.42
   2   7   9   44.02    2.27
   2   7   9   40.10    2.49
   2   7   9   39.80    2.23
  -2   7  -9   36.09    2.10
   2  -7  10  397.16   10.14
   2   7  10  418.33    9.40
   2   7  10  414.87    9.75
   2   7  10  398.88    9.32
  -2   7 -10  360.12   11.78
  -2  -7 -10  382.52   11.87
  -2  -7 -10  403.55   12.89
   2   7  10  412.15    9.98
   2  -7  10  397.11   10.13
   2   7  10  386.36    9.18
   2  -7  10  408.14   10.18
   2   7  11    3.84    0.94
   2  -7  11    4.28    0.98
   2   7  11    5.52    0.96
   2   7  11    4.77    0.83
   2  -7  11    4.68    1.07
   2   7  11    6.02    1.05
   2  -7  11    6.55    1.16
   2  -7  12   13.42    1.20
   2  -7  12   14.59    1.29
   2  -7  12   14.55    1.29
   2   7  12   14.20    1.21
   2   7  12   15.35    1.13
   2  -7  13    7.75    0.82
   2   7  13    7.41    0.64
   2  -7  13    7.32    0.73
   2  -7  13    8.67    0.71
   2   7  13    8.21    0.71
  -2   8  14   56.57    1.18
  -2  -8  14    1.91    0.42
  -2  -8  13    2.08    0.64
  -2   8  13    2.50    0.66
  -2  -8  13    2.18    0.64
  -2   8  12    8.75    1.12
  -2   8  12   12.03    1.38
  -2   8  12    8.71    0.99
  -2  -8  12    9.44    1.12
  -2  -8  12    9.00    1.19
  -2  -8  11    2.75    0.90
  -2  -8  11    2.08    0.71
  -2   8  11    2.17    0.80
  -2   8  11    1.55    0.85
  -2  -8  11    1.71    0.66
  -2   8  11    1.68    1.04
  -2   8  11    1.51    0.97
  -2  -8  11    2.25    0.92
  -2  -8  10   82.94    3.50
  -2  -8  10   88.07    3.13
   2  -8 -10   76.87    4.64
  -2   8  10   79.32    3.40
   2   8 -10   78.93    4.89
  -2  -8  10   78.52    3.26
  -2   8  10   84.44    3.77
  -2   8  10   80.34    3.36
  -2  -8  10   82.46    3.67
  -2   8  10   81.12    3.78
  -2   8   9   19.03    2.32
  -2  -8   9   17.36    1.63
  -2  -8   9   18.82    1.63
   2   8  -9   19.04    2.43
  -2  -8   9   17.57    1.38
  -2   8   9   20.13    1.91
  -2   8   9   19.20    1.70
  -2   8   9   16.25    1.60
  -2   8   9   15.44    1.80
   2  -8  -9   16.07    2.22
  -2  -8   9   17.87    1.76
  -2  -8   8   67.02    2.95
  -2  -8   8   63.35    2.76
  -2  -8   8   61.25    2.87
   2   8  -8   64.20    4.22
  -2   8   8   57.39    3.94
  -2  -8   8   54.73    2.38
   2  -8  -8   63.83    4.08
  -2   8   8   62.58    2.95
  -2   8   8   59.70    3.12
  -2   8   8   59.77    3.10
  -2   8   8   51.93    2.72
  -2  -8   8   60.52    3.03
   2  -8  -7   57.59    3.74
  -2   8   7   57.22    2.87
  -2  -8   7   57.39    2.69
   2   8  -7   50.81    3.66
  -2   8   7   50.85    3.63
  -2  -8   7   57.92    2.64
  -2   8   7   55.25    2.87
  -2   8   7   53.07    2.66
  -2  -8   7   59.04    2.31
   2  -8  -6   15.58    1.93
  -2  -8   6   15.30    1.32
   2  -8  -6   12.40    1.41
  -2   8   6   11.62    1.80
   2   8  -6   15.40    1.97
  -2   8   6   15.49    1.49
   2   8  -6   16.43    1.53
  -2   8   6   14.21    1.36
  -2  -8   6   14.21    1.29
  -2   8   6   15.08    1.31
  -2   8   6   13.58    1.47
  -2   8   5    0.50    0.63
  -2  -8   5    0.67    0.52
   2  -8  -5    1.01    0.92
  -2   8   5    0.80    0.85
  -2  -8   5    1.12    0.86
   2  -8  -5    0.73    0.57
   2   8  -5    2.57    1.07
  -2   8   5    2.51    0.90
   2   8  -5    3.22    0.86
  -2   8   5    1.39    0.78
  -2   8   4  218.98    7.33
  -2  -8   4  218.33    7.07
   2   8  -4  215.20    7.06
   2   8  -4  212.80    6.42
  -2  -8   4  203.85    6.85
   2  -8  -4  199.13    5.72
   2  -8  -4  212.71    6.97
   2  -8  -3 1214.10   25.47
  -2   8   3 1225.76   26.05
  -2  -8   3 1276.18   25.83
   2   8  -3 1251.45   25.16
  -2  -8   3 1264.64   25.86
   2  -8  -3 1180.22   23.84
  -2   8   3 1268.59   25.99
   2   8  -3 1288.41   25.88
  -2  -8   2  155.94    5.45
  -2  -8   2  155.29    5.58
  -2   8   2  150.42    5.04
   2   8  -2  157.97    5.51
  -2   8   2  158.48    4.65
   2  -8  -2  159.69    5.37
  -2   8   2  155.86    5.08
   2  -8  -2  150.46    4.25
  -2   8   2  157.57    5.65
   2   8  -2  156.28    5.26
  -2   8   1  105.00    3.91
   2  -8  -1  100.43    3.18
   2   8  -1  109.82    4.34
  -2   8   1   99.05    3.45
   2  -8  -1  101.19    4.03
  -2   8   1  104.40    3.96
  -2  -8   1  104.92    4.27
  -2  -8   1   94.67    4.14
  -2   8   1  106.82    4.36
  -2   8   0  260.95    7.55
   2  -8   0  253.11    6.30
  -2   8   0  256.25    6.57
   2   8   0  273.93    7.72
  -2   8   0  264.20    7.67
   2   8   0  265.28    7.46
  -2   8   0  263.17    7.27
  -2  -8   0  270.03    7.74
   2  -8   0  258.55    7.84
   2  -8   0  271.29    7.43
  -2  -8  -1   52.31    2.29
   2  -8   1   52.32    2.98
  -2   8  -1   51.73    3.00
  -2   8  -1   53.01    2.45
   2   8   1   59.35    3.16
  -2   8  -1   54.28    2.68
  -2   8  -1   58.32    2.94
   2   8   1   52.85    2.85
   2   8   1   49.67    2.41
  -2  -8  -1   52.46    3.00
   2  -8   1   56.42    3.05
  -2   8  -2  206.89    5.87
   2  -8   2  198.55    6.20
  -2   8  -2  197.40    5.84
   2   8   2  188.67    6.52
  -2   8  -2  208.47    6.45
   2   8   2  203.54    5.86
   2   8   2  212.51    6.41
  -2  -8  -2  202.63    6.77
   2  -8   2  199.85    6.58
   2  -8   3  144.12    5.02
  -2   8  -3  147.70    5.05
   2   8   3  143.70    5.15
   2   8   3  148.03    4.93
   2  -8   3  148.98    5.60
  -2  -8  -3  156.56    5.90
  -2   8  -3  140.34    5.30
  -2  -8  -4  370.81   10.80
   2  -8   4  373.52    8.79
   2  -8   4  372.08    9.55
  -2   8  -4  363.17    9.82
   2  -8   4  382.23   10.58
   2   8   4  377.90    8.63
   2   8   4  360.24    9.53
   2   8   4  364.63    9.55
  -2  -8  -5    4.15    1.28
  -2   8  -5    6.71    1.27
   2  -8   5    6.84    1.14
  -2   8  -5    6.06    1.26
   2  -8   5    5.66    1.33
  -2   8  -5    6.16    0.88
   2   8   5    6.84    1.06
   2   8   5    6.28    1.03
   2   8   5    8.13    1.26
   2   8   5    6.20    0.91
   2   8   6   29.80    2.42
  -2   8  -6   30.44    2.65
   2  -8   6   32.01    2.27
  -2   8  -6   28.25    2.57
   2   8   6   27.62    1.89
   2  -8   6   30.42    2.02
  -2  -8  -6   29.28    2.86
   2  -8   6   30.78    2.74
   2   8   6   27.80    1.75
   2   8   6   29.27    1.89
   2   8   7    9.27    1.17
   2   8   7   10.62    1.59
  -2  -8  -7    8.91    1.78
  -2   8  -7    8.15    1.64
   2   8   7   10.90    1.28
  -2   8  -7   12.34    1.81
   2  -8   7   13.02    1.49
   2   8   7   10.99    1.36
  -2  -8  -8  208.94    8.59
  -2   8  -8  193.09    7.71
  -2   8  -8  209.84    6.14
  -2   8  -8  193.87    7.43
   2  -8   8  196.68    6.17
   2   8   8  187.12    5.58
   2   8   8  195.38    5.80
   2   8   8  200.28    7.29
   2   8   8  198.60    6.13
   2   8   8  200.43    5.85
   2  -8   8  204.52    6.45
  -2   8  -9   19.60    2.23
  -2  -8  -9   20.57    2.66
   2  -8   9   21.90    2.01
  -2   8  -9   17.29    2.33
   2   8   9   20.72    1.82
   2   8   9   22.47    1.68
  -2   8  -9   21.04    1.63
   2   8   9   21.74    1.79
   2   8   9   20.68    1.63
   2  -8  10   29.99    2.16
   2   8  10   34.81    2.00
   2   8  10   26.76    1.71
   2  -8  10   33.08    2.26
   2   8  10   36.30    2.03
   2   8  10   30.43    2.08
   2   8  10   27.24    1.91
   2  -8  10   33.21    2.28
   2   8  11   20.42    1.36
   2  -8  11   18.30    1.58
   2   8  11   17.56    1.36
   2   8  11   18.14    1.46
   2  -8  11   18.37    1.57
   2  -8  11   17.60    1.53
   2  -8  12    5.74    0.86
   2   8  12    6.24    0.80
   2  -8  12    6.09    0.84
   2   8  12    4.17    0.76
   2  -8  12    4.10    0.79
   2  -8  13    0.76    0.31
   2   8  13    1.81    0.45
   2  -8  13    1.33    0.38
   2  -8  13    1.00    0.46
  -2  -9  13   71.33    2.37
  -2   9  13   68.23    2.24
  -2  -9  13   73.97    2.46
  -2  -9  12   16.15    1.29
  -2   9  12   17.05    1.26
  -2   9  12   14.59    1.28
  -2  -9  12   16.36    1.41
  -2   9  11   14.42    1.42
  -2   9  11   19.54    1.83
  -2  -9  11   15.39    1.16
  -2  -9  11   15.56    1.28
  -2   9  11   16.20    1.41
  -2  -9  11   16.48    1.47
  -2  -9  11   13.46    1.45
   2  -9 -10    3.59    1.26
   2   9 -10    6.43    1.58
  -2  -9  10    4.65    0.97
  -2   9  10    5.69    1.12
  -2  -9  10    6.67    1.10
  -2  -9  10    4.56    0.81
  -2   9  10    5.98    1.08
  -2  -9  10    5.13    1.14
  -2   9  10    6.67    1.36
   2  -9  -9   33.33    3.08
  -2   9   9   32.48    2.98
  -2  -9   9   34.82    2.02
  -2  -9   9   31.60    1.75
  -2  -9   9   34.97    2.15
   2   9  -9   34.47    3.23
  -2   9   9   28.89    2.05
  -2  -9   9   33.66    2.17
  -2   9   9   33.05    2.21
  -2   9   9   39.38    2.57
  -2   9   9   34.52    2.46
  -2  -9   9   35.01    2.38
   2  -9  -8  154.96    6.79
  -2  -9   8  155.20    4.96
  -2   9   8  153.80    6.78
  -2  -9   8  152.59    4.83
   2   9  -8  144.31    6.81
  -2   9   8  149.96    5.06
  -2  -9   8  149.06    4.97
  -2   9   8  155.45    5.41
  -2   9   8  163.26    5.46
  -2  -9   8  150.97    5.25
  -2   9   7   15.73    2.16
   2   9  -7   17.95    2.29
  -2  -9   7   15.71    1.47
  -2   9   7   15.58    1.53
   2  -9  -7   14.24    2.01
  -2  -9   7   16.71    1.47
  -2   9   7   16.05    1.52
  -2   9   7   12.99    1.62
  -2   9   7   17.63    1.77
  -2   9   6    1.31    0.96
  -2  -9   6    1.49    0.71
   2   9  -6    3.85    1.25
  -2  -9   6    1.84    0.77
   2  -9  -6    2.24    1.04
  -2   9   6    2.44    0.84
  -2   9   6    2.51    0.86
  -2   9   6    2.68    1.01
   2   9  -6    1.62    0.72
  -2  -9   6    1.57    0.91
  -2   9   5   27.48    2.59
  -2   9   5   25.73    1.96
  -2  -9   5   25.89    1.71
  -2  -9   5   27.94    2.47
   2   9  -5   28.49    2.58
   2  -9  -5   25.90    1.88
   2   9  -5   30.06    2.16
  -2   9   5   25.91    1.64
  -2   9   5   25.86    1.59
   2  -9  -5   25.94    2.42
  -2  -9   4  170.66    6.25
   2  -9  -4  155.77    5.86
   2   9  -4  156.93    6.13
  -2   9   4  160.52    5.08
   2   9  -4  163.97    5.62
  -2   9   4  166.12    6.41
  -2  -9   4  169.97    6.23
  -2   9   4  152.32    4.59
  -2   9   4  150.09    4.49
   2  -9  -4  163.43    5.00
  -2  -9   3   18.35    1.97
   2   9  -3   19.52    2.01
  -2   9   3   19.04    2.00
   2  -9  -3   20.22    1.95
   2  -9  -3   18.70    1.41
   2   9  -3   20.61    1.88
  -2  -9   3   16.11    1.85
  -2   9   3   21.06    2.17
  -2   9   2  361.41   10.47
   2   9  -2  372.92   10.09
   2   9  -2  413.52   10.71
  -2   9   2  408.91    9.47
  -2  -9   2  408.79   10.62
   2  -9  -2  399.87   10.26
   2  -9  -2  368.76    8.82
  -2   9   2  400.90   10.68
  -2  -9   2  373.99   10.49
   2  -9  -1    7.93    1.55
   2  -9  -1    7.69    0.88
  -2   9   1    9.14    1.07
   2   9  -1    8.73    1.40
  -2  -9   1    6.03    1.21
  -2   9   1    7.43    1.22
  -2  -9   1    8.70    1.35
   2  -9  -1    7.85    1.20
  -2   9   1    8.10    1.37
  -2   9   0   57.77    3.22
   2  -9   0   48.26    2.27
  -2   9   0   55.69    2.97
  -2   9   0   51.64    3.06
   2  -9   0   50.70    3.05
   2   9   0   48.91    3.01
  -2  -9   0   49.95    3.06
   2   9   0   45.47    2.84
  -2   9   0   49.88    2.46
   2  -9   0   48.49    3.23
   2   9   1   22.37    1.98
  -2   9  -1   21.65    1.67
   2  -9   1   21.13    2.37
   2   9   1   21.23    2.07
  -2   9  -1   23.17    1.98
   2   9   1   23.88    1.66
   2  -9   1   24.84    2.21
  -2   9  -1   20.64    1.99
  -2  -9  -1   22.47    2.10
  -2  -9  -1   24.39    1.59
  -2  -9  -2   26.71    1.85
  -2   9  -2   29.11    2.25
  -2   9  -2   24.83    1.88
   2  -9   2   28.46    2.50
   2   9   2   29.43    2.24
   2   9   2   28.40    1.93
  -2  -9  -2   34.23    2.64
   2  -9   2   30.71    2.46
   2  -9   3  242.86    6.41
   2  -9   3  261.72    7.36
  -2   9  -3  257.13    7.47
  -2   9  -3  259.10    7.91
   2   9   3  250.99    7.57
  -2   9  -3  254.26    6.49
   2   9   3  246.99    7.06
   2  -9   3  256.26    8.10
   2   9   3  232.93    6.29
  -2  -9  -3  259.80    8.44
   2  -9   4  113.67    4.02
  -2   9  -4  118.32    4.89
   2  -9   4  124.68    4.66
   2   9   4  114.63    4.66
  -2   9  -4  118.71    3.93
   2   9   4  117.17    4.57
   2  -9   4  122.14    5.38
   2   9   4  121.76    4.00
  -2  -9  -4  121.07    5.58
  -2  -9  -5   64.27    4.16
   2  -9   5   62.15    3.19
  -2   9  -5   64.45    3.69
  -2   9  -5   62.49    3.75
  -2   9  -5   62.36    2.68
   2   9   5   63.27    3.39
   2  -9   5   59.45    3.79
   2   9   5   65.12    2.82
   2  -9   6    2.60    1.15
   2  -9   6    3.19    0.92
  -2   9  -6    3.25    1.14
  -2   9  -6    1.71    0.99
   2   9   6    3.49    0.89
   2   9   6    3.83    1.06
  -2  -9  -6    2.35    1.19
   2  -9   7  181.32    5.86
   2   9   7  174.08    6.57
  -2   9  -7  167.63    7.05
  -2   9  -7  183.64    7.11
  -2  -9  -7  188.07    7.96
   2   9   7  174.14    5.20
   2   9   7  180.52    5.51
   2   9   7  178.55    5.32
   2   9   7  182.11    5.69
  -2  -9  -8   39.01    3.57
  -2   9  -8   39.81    3.33
   2   9   8   41.58    3.02
  -2   9  -8   39.93    3.16
   2   9   8   42.60    2.61
  -2   9  -8   40.53    2.46
   2   9   8   41.18    2.35
   2  -9   8   40.36    2.51
   2   9   8   43.91    2.37
   2  -9   8   43.87    2.72
  -2  -9  -9  133.38    6.66
  -2   9  -9  123.93    5.99
  -2   9  -9  122.48    5.49
  -2   9  -9  115.89    4.19
   2   9   9  123.90    4.29
   2   9   9  128.21    4.26
   2  -9   9  130.65    4.83
   2  -9  10    1.60    0.83
   2   9  10    0.94    0.69
   2  -9  10    1.51    0.92
   2   9  10    0.68    0.81
   2   9  10    0.93    0.75
   2  -9  10    1.67    0.97
   2   9  11    7.21    0.91
   2  -9  11    7.64    1.04
   2   9  11    5.58    0.88
   2   9  11    6.11    0.90
   2  -9  11    8.26    1.15
   2  -9  11    7.86    1.11
   2  -9  12   30.90    1.59
   2   9  12   32.02    1.50
   2   9  12   28.78    1.40
   2  -9  12   35.62    1.73
   2   9  12   34.00    1.37
   2  -9  12   30.99    1.63
   2   9  13   32.10    1.14
   2  -9  13   30.95    1.19
  -2 -10  13   26.35    1.19
  -2  10  13   28.57    1.25
  -2 -10  13   25.72    1.22
  -2  10  12    1.46    0.67
  -2 -10  12    1.93    0.63
  -2  10  12    1.95    0.64
  -2 -10  12    2.05    0.71
  -2  10  11    0.87    0.76
  -2 -10  11   -0.09    0.74
  -2 -10  11    0.07    0.62
  -2  10  11   -0.72    0.89
  -2 -10  10    0.50    0.67
  -2  10  10   -0.08    0.87
  -2  10  10    0.95    0.80
  -2 -10  10    1.51    0.73
  -2 -10  10    1.01    0.87
  -2  10   9  117.73    5.78
  -2 -10   9  118.19    4.09
  -2 -10   9  124.51    4.33
   2  10  -9  113.66    6.02
  -2 -10   9  121.71    4.28
  -2  10   9  120.66    4.37
  -2  10   9  120.59    4.76
  -2 -10   9  123.99    4.67
   2 -10  -9  117.40    5.91
   2 -10  -8  140.86    6.53
  -2  10   8  141.08    6.57
  -2 -10   8  136.98    4.66
  -2 -10   8  149.06    4.89
   2  10  -8  147.16    6.84
  -2  10   8  141.77    4.93
  -2  10   8  136.50    4.71
  -2 -10   8  151.86    4.82
  -2  10   8  140.71    5.18
   2 -10  -7   77.18    4.65
  -2 -10   7   88.07    3.41
  -2  10   7   81.97    3.50
  -2 -10   7   88.85    3.59
   2  10  -7   89.52    5.11
  -2  10   7   82.71    3.40
  -2  10   7   84.61    4.94
  -2  10   7   88.42    3.92
  -2 -10   6   16.83    1.53
   2 -10  -6   15.29    2.03
  -2 -10   6   13.86    1.87
  -2  10   6   14.02    1.31
  -2 -10   6   16.00    1.41
  -2  10   6   19.59    2.04
   2  10  -6   15.09    2.07
  -2  10   6   16.21    2.19
  -2 -10   5   45.08    3.18
  -2  10   5   44.19    3.42
  -2 -10   5   46.87    2.37
   2  10  -5   46.99    3.44
   2  10  -5   47.10    2.87
  -2  10   5   41.14    2.30
  -2  10   5   44.46    2.13
  -2  10   5   56.15    3.07
  -2  10   5   43.04    2.19
  -2  10   4  131.83    5.80
  -2 -10   4  135.31    5.72
  -2 -10   4  124.71    5.46
   2  10  -4  133.22    5.74
   2 -10  -4  136.73    5.47
   2  10  -4  127.34    5.00
  -2  10   4  124.52    4.05
  -2  10   4  115.62    3.94
  -2  10   4  114.50    3.70
  -2  10   3    0.82    0.88
  -2 -10   3    0.15    0.77
   2  10  -3    0.47    0.91
  -2 -10   3    0.47    0.61
  -2  10   3    0.64    0.76
   2 -10  -3    1.00    0.55
   2 -10  -3    0.96    0.80
  -2  10   3    0.90    0.62
  -2  10   3    1.13    0.64
   2  10  -3    0.64    0.72
  -2 -10   3    0.93    0.93
  -2  10   2  396.51   11.32
  -2 -10   2  413.90   11.35
   2  10  -2  411.97   11.37
  -2 -10   2  432.51   11.42
   2 -10  -2  404.78    9.55
   2 -10  -2  433.79   11.01
  -2  10   2  401.53   11.29
   2  10  -2  431.62   10.99
   2 -10  -2  423.54   11.64
  -2  10   2  389.82    9.31
   2 -10  -1    3.46    0.73
   2 -10  -1    5.45    1.56
  -2 -10   1    2.78    1.05
  -2 -10   1    4.18    1.13
  -2  10   1    3.27    0.80
  -2  10   1    3.29    1.05
   2 -10  -1    4.47    1.09
   2  10  -1    4.00    1.12
  -2  10   1    4.18    0.76
  -2  10   1    3.80    1.13
   2 -10   0  176.81    5.24
   2  10   0  170.01    5.11
  -2  10   0  170.06    5.44
   2 -10   0  162.89    6.11
  -2  10   0  181.37    6.19
  -2 -10   0  178.98    6.49
   2  10   0  177.35    6.20
  -2  10   0  159.96    6.22
  -2  10   0  180.13    6.47
   2 -10   0  191.99    6.84
  -2  10  -1  129.73    4.64
   2 -10   1  138.46    5.38
  -2  10  -1  130.76    5.17
   2  10   1  124.64    4.28
   2  10   1  130.99    5.18
  -2 -10  -1  141.47    5.63
  -2  10  -1  121.37    3.95
  -2  10  -1  114.19    5.15
   2 -10   1  134.74    5.47
  -2 -10  -2    8.14    1.14
   2 -10   2    6.70    1.42
   2 -10   2    9.19    1.00
   2  10   2    9.10    1.14
  -2  10  -2    8.70    1.23
  -2  10  -2    9.20    1.46
   2 -10   2    7.02    1.97
  -2  10  -2    9.83    1.13
   2  10   2    9.10    1.04
   2  10   2   10.72    1.48
  -2 -10  -2    6.83    1.42
   2 -10   3   38.48    2.10
   2  10   3   37.98    2.34
  -2  10  -3   38.21    2.57
   2 -10   3   37.77    2.48
  -2  10  -3   38.85    2.81
   2  10   3   41.68    2.78
  -2  10  -3   38.26    2.12
  -2 -10  -3   41.85    2.60
  -2 -10  -3   44.38    3.28
   2 -10   3   36.26    2.87
   2  10   3   35.17    2.02
   2 -10   4    1.54    1.02
  -2  10  -4    0.57    0.81
  -2 -10  -4    0.96    0.98
   2 -10   4    0.57    0.74
   2  10   4    0.40    0.72
  -2  10  -4    0.32    0.60
   2  10   4    0.12    0.55
   2 -10   4    0.26    0.61
   2  10   4    0.72    0.65
   2 -10   5    0.18    0.87
   2 -10   5    0.09    0.65
   2  10   5    0.26    0.68
  -2  10  -5   -0.16    0.82
  -2  10  -5    0.50    0.84
  -2  10  -5    0.48    0.58
  -2 -10  -5    0.21    1.07
   2  10   5    0.51    0.69
   2 -10   6   31.34    2.90
   2 -10   6   31.76    2.21
  -2  10  -6   30.80    2.78
  -2  10  -6   32.48    2.82
   2  10   6   26.56    2.31
   2  10   6   33.92    1.92
  -2  10  -6   30.11    1.85
   2  10   6   31.03    2.07
  -2 -10  -6   32.23    3.23
  -2 -10  -7   78.71    5.03
   2  10   7   75.44    3.29
  -2  10  -7   73.30    4.42
  -2  10  -7   73.59    4.31
   2  10   7   70.23    3.87
   2  10   7   75.17    3.06
   2 -10   7   73.70    3.48
   2  10   7   69.12    2.98
   2 -10   8   80.79    3.79
   2  10   8   85.39    3.36
  -2  10  -8   80.33    4.77
  -2  10  -8   95.38    4.85
  -2  10  -8   87.77    3.70
   2  10   8   82.41    3.35
   2 -10   8   88.69    3.84
   2  10   8   88.79    3.55
  -2 -10  -8   88.14    5.39
   2  10   9   89.35    3.39
   2  10   9   91.15    3.43
  -2  10  -9   88.81    3.52
   2 -10   9   82.32    3.73
   2 -10  10   53.61    2.72
   2 -10  10   50.53    2.69
   2  10  10   51.49    2.35
  -2  10 -10   50.17    2.17
   2  10  10   59.26    2.50
   2 -10  10   55.43    2.70
   2 -10  11    2.15    0.71
   2  10  11    1.73    0.63
   2  10  11    2.46    0.75
   2 -10  11    2.54    0.78
   2  10  11    3.96    0.78
   2 -10  11    1.57    0.67
   2 -10  12    0.63    0.49
   2  10  12    0.82    0.41
   2  10  12    0.93    0.49
   2 -10  12    0.09    0.43
   2 -10  12    0.36    0.45
  -2  11  13   31.90    1.20
  -2 -11  12   12.72    0.96
  -2  11  12   10.95    0.97
  -2  11  12   12.33    0.99
  -2 -11  12   14.33    1.10
  -2  11  11    7.51    1.00
  -2 -11  11    9.10    1.17
  -2 -11  11    9.47    1.02
  -2 -11  10    0.27    0.53
  -2 -11  10    1.05    0.73
  -2  11  10    0.91    0.84
  -2 -11  10    1.04    0.83
  -2 -11   9   52.06    2.57
  -2 -11   9   54.35    2.61
   2  11  -9   50.60    3.88
  -2 -11   9   49.97    2.64
  -2 -11   9   53.66    2.93
  -2  11   9   50.25    2.60
  -2  11   9   59.01    2.87
   2 -11  -9   59.51    4.09
  -2  11   8   96.75    5.37
  -2  11   8   97.90    4.01
  -2 -11   8  101.58    4.00
  -2 -11   8  103.12    3.79
   2  11  -8   94.52    5.46
   2 -11  -8   99.38    5.28
  -2  11   8   99.37    3.84
  -2 -11   8  102.89    3.89
   2 -11  -8  100.42    5.49
  -2  11   8  116.90    4.77
  -2  11   7  141.16    6.68
  -2 -11   7  145.46    4.93
   2  11  -7  149.00    6.84
  -2 -11   7  140.87    4.62
   2 -11  -7  135.94    6.25
  -2  11   7  141.85    4.61
  -2  11   7  159.89    5.72
   2 -11  -7  142.43    6.61
  -2 -11   6   44.69    2.31
  -2  11   6   46.50    3.68
  -2 -11   6   45.32    2.47
   2  11  -6   42.64    3.52
  -2 -11   6   47.40    3.37
  -2  11   6   39.76    2.15
   2 -11  -6   39.59    3.16
  -2  11   6   39.06    2.16
   2 -11  -6   37.24    3.25
  -2  11   5    2.03    1.13
   2 -11  -5    2.04    1.07
  -2 -11   5    3.19    1.15
   2  11  -5    2.75    1.18
  -2  11   5    1.47    0.74
  -2  11   5    2.62    0.86
  -2  11   5    1.98    0.73
   2  11  -5    0.53    0.68
   2  11  -4    8.12    1.61
  -2 -11   4    6.38    1.01
   2 -11  -4    7.78    1.49
  -2  11   4    7.96    1.07
  -2 -11   4    7.89    1.56
  -2  11   4    7.15    0.97
  -2  11   4    8.79    1.07
  -2  11   4    6.68    1.50
  -2 -11   4    9.86    1.69
   2  11  -4    6.51    1.27
  -2 -11   3    3.24    1.15
  -2  11   3    2.10    0.80
   2  11  -3    5.10    1.28
  -2 -11   3    4.59    0.88
   2 -11  -3    5.23    1.27
  -2 -11   3    4.43    1.31
  -2  11   3    3.44    1.22
   2 -11  -3    2.48    1.29
  -2  11   3    3.48    0.86
  -2  11   3    3.82    0.83
   2  11  -3    3.67    1.02
  -2  11   2   74.51    3.04
  -2  11   2   76.31    4.33
  -2 -11   2   82.39    2.99
   2  11  -2   67.20    4.09
   2 -11  -2   74.58    3.89
  -2 -11   2   78.16    4.31
   2  11  -2   73.63    3.92
  -2 -11   2   82.95    4.37
  -2  11   2   73.98    2.79
   2 -11  -2   69.07    4.32
  -2 -11   1   75.71    2.80
   2 -11  -1   78.16    3.25
   2 -11  -1   80.95    4.00
  -2 -11   1   76.13    4.17
  -2  11   1   82.60    4.11
  -2 -11   1   74.14    4.21
   2 -11  -1   75.11    4.49
  -2  11   1   73.25    3.04
  -2 -11   0   29.22    2.64
   2 -11   0   19.32    1.60
  -2  11   0   21.32    2.24
  -2  11   0   20.63    1.78
   2 -11   0   17.56    2.62
  -2  11   0   24.22    2.21
  -2 -11   0   20.72    2.24
   2  11   0   23.40    2.21
   2 -11   0   25.75    2.72
  -2  11  -1   92.36    4.58
   2 -11   1   83.40    3.05
   2 -11   1   81.98    4.37
  -2  11  -1   82.66    3.76
  -2  11  -1   88.41    4.33
   2  11   1   87.30    4.31
  -2 -11  -1   83.85    4.48
   2 -11   1   99.07    4.69
  -2  11  -1   74.39    3.10
   2 -11   2    1.87    0.68
  -2  11  -2    2.05    0.78
  -2  11  -2    1.62    0.81
  -2  11  -2    1.38    0.92
   2  11   2    1.80    0.66
  -2 -11  -2    3.94    1.31
   2  11   2    2.52    1.09
   2 -11   2    2.78    1.10
  -2 -11  -3  105.40    4.44
   2 -11   3  102.99    4.26
  -2  11  -3   98.69    4.50
  -2  11  -3   89.43    4.60
   2  11   3   90.83    3.58
   2  11   3  102.53    4.69
  -2  11  -3  103.17    3.81
   2 -11   3   93.60    3.61
  -2 -11  -3   94.68    5.09
   2  11   3  102.11    4.04
   2 -11   3   94.89    4.88
  -2 -11  -4   16.58    1.86
   2 -11   4   15.44    1.51
  -2 -11  -4   14.34    2.08
  -2  11  -4   15.75    1.88
   2  11   4   14.02    1.56
   2  11   4   15.06    1.76
  -2  11  -4   15.68    1.44
   2 -11   4   14.42    2.00
   2  11   4   13.57    1.39
  -2 -11  -5  131.67    5.65
   2 -11   5  125.20    4.60
  -2  11  -5  130.20    5.74
   2  11   5  138.65    4.07
  -2  11  -5  120.06    5.68
   2 -11   5  129.74    6.03
   2  11   5  125.41    5.05
  -2  11  -5  130.41    4.40
  -2 -11  -5  126.00    6.33
   2  11   5  134.04    4.56
   2 -11   6    1.59    1.13
   2  11   6    1.81    0.88
  -2  11  -6    1.65    1.02
  -2 -11  -6    0.70    1.08
  -2  11  -6    0.37    0.88
   2  11   6    2.37    0.86
  -2  11  -6    1.11    0.60
   2  11   6    2.04    0.84
   2  11   7   31.28    1.88
  -2  11  -7   29.74    2.83
   2  11   7   27.71    2.40
  -2  11  -7   28.88    2.70
   2 -11   7   27.27    2.12
   2  11   7   29.36    2.04
   2  11   8   50.43    2.48
  -2  11  -8   53.13    3.56
   2 -11   8   54.10    2.93
   2  11   8   54.16    2.56
   2 -11   8   54.43    2.99
   2  11   9   23.89    1.64
  -2  11  -9   25.71    1.82
   2  11   9   27.04    1.73
   2 -11   9   27.19    2.05
   2  11   9   27.25    1.79
   2 -11  10    0.26    0.62
   2 -11  10    0.08    0.76
   2  11  10    0.06    0.64
  -2  11 -10    0.38    0.50
   2 -11  10   -0.17    0.74
   2 -11  11   12.36    1.12
   2  11  11   14.86    1.06
   2 -11  11   14.74    1.19
   2 -11  11   15.33    1.23
   2  11  12   24.44    1.12
   2 -11  12   25.18    1.17
   2 -11  12   25.35    1.15
   2  11  12   27.21    1.04
   2 -11  12   26.62    1.20
  -2  12  13   52.07    1.40
  -2 -12  12    1.19    0.39
  -2 -12  12    0.94    0.48
  -2  12  12    0.16    0.66
  -2 -12  11    4.65    0.71
  -2  12  11    5.50    0.86
  -2 -12  11    4.31    0.87
  -2 -12  10   14.94    1.24
  -2  12  10   12.97    1.29
  -2 -12  10   16.09    1.48
  -2 -12  10   14.27    1.23
  -2  12  10   17.15    1.43
  -2 -12   9    0.23    0.63
  -2  12   9   -0.32    0.90
  -2 -12   9    0.60    0.87
  -2 -12   9    0.32    0.63
  -2  12   9    0.70    0.88
  -2 -12   8   35.95    2.24
  -2  12   8   30.28    2.94
   2  12  -8   29.47    3.03
   2 -12  -8   33.27    2.97
   2 -12  -8   35.08    3.24
  -2  12   8   32.33    2.22
  -2 -12   8   34.38    2.19
  -2 -12   8   35.13    2.06
  -2  12   8   35.86    2.10
  -2 -12   7   56.66    2.65
  -2 -12   7   59.22    2.96
   2  12  -7   53.46    4.05
   2 -12  -7   63.65    4.09
  -2  12   7   58.15    2.69
  -2  12   7   55.27    4.07
   2 -12  -7   54.97    4.02
  -2 -12   6   68.43    2.90
  -2  12   6   63.87    4.38
  -2 -12   6   69.13    3.16
   2  12  -6   66.20    4.49
   2 -12  -6   60.88    4.01
  -2  12   6   66.29    3.12
  -2 -12   6   68.23    4.10
  -2  12   6   64.63    2.76
  -2  12   6   63.22    2.85
  -2 -12   5    2.78    0.79
  -2  12   5    2.58    1.24
  -2 -12   5    2.43    1.04
   2  12  -5    2.10    1.21
   2 -12  -5    1.80    1.06
  -2  12   5    3.10    0.83
  -2  12   5    2.88    0.88
  -2  12   5    2.21    0.71
   2  12  -5    1.67    0.82
  -2 -12   4    9.13    1.16
  -2  12   4    7.61    1.58
   2 -12  -4    5.04    1.62
  -2 -12   4    8.14    1.63
   2 -12  -4    7.48    1.52
  -2 -12   4    5.84    1.48
  -2  12   4    5.07    0.97
  -2  12   4    7.21    1.09
   2  12  -4   12.29    1.91
  -2  12   4    7.60    1.04
   2  12  -4    8.57    1.50
  -2  12   3   38.27    3.25
   2  12  -3   37.43    3.17
   2 -12  -3   38.51    2.96
  -2 -12   3   42.32    3.31
  -2 -12   3   39.00    3.16
   2  12  -3   37.08    2.81
  -2  12   3   39.89    2.09
  -2  12   3   36.26    2.15
  -2 -12   3   39.02    2.17
   2 -12  -3   39.54    3.44
  -2  12   2   38.05    3.19
  -2 -12   2   40.77    2.12
  -2 -12   2   35.33    3.08
  -2 -12   2   39.36    3.11
   2 -12  -2   38.15    2.87
   2  12  -2   39.03    2.91
  -2  12   2   39.45    2.21
   2 -12  -2   35.43    3.32
  -2  12   2   39.04    2.02
   2 -12  -1   70.41    3.83
  -2 -12   1   61.29    3.89
  -2 -12   1   62.43    4.06
   2  12  -1   56.39    3.58
  -2  12   1   54.34    2.68
   2 -12  -1   65.62    4.34
  -2  12   0  200.25    7.51
  -2 -12   0  186.23    7.33
   2 -12   0  201.49    7.31
  -2  12   0  195.16    7.20
  -2 -12   0  195.05    7.44
   2  12   0  193.86    7.07
  -2  12   0  173.07    5.48
   2 -12   0  213.07    7.76
  -2  12  -1   28.95    2.71
   2 -12   1   30.78    1.79
  -2 -12  -1   27.98    2.67
   2 -12   1   31.15    2.85
   2  12   1   31.39    2.68
  -2  12  -1   31.95    2.74
  -2  12  -1   27.66    1.86
   2 -12   2    2.13    1.13
   2 -12   2    3.51    0.82
  -2  12  -2    1.86    0.83
  -2  12  -2    1.18    0.98
  -2 -12  -2    2.32    1.14
  -2  12  -2    3.29    1.02
   2  12   2    1.94    0.97
  -2  12  -3   36.14    2.71
  -2  12  -3   34.10    3.06
   2  12   3   34.40    2.76
  -2  12  -3   37.57    2.27
   2 -12   3   37.38    2.19
  -2 -12  -3   34.51    3.12
   2 -12   3   30.54    2.92
   2 -12   4    2.89    1.21
  -2  12  -4    3.51    1.36
  -2  12  -4    6.48    1.39
   2  12   4    5.09    0.80
   2 -12   4    4.59    0.97
  -2 -12  -4    5.23    1.57
  -2  12  -4    4.35    0.99
   2 -12   5   11.74    1.88
  -2 -12  -5   12.14    2.12
   2 -12   5   11.76    1.47
  -2  12  -5    7.68    1.55
  -2  12  -5   12.58    2.08
  -2  12  -5   12.35    1.86
  -2  12  -5   11.88    1.34
   2  12   5   11.72    1.13
  -2 -12  -6   68.11    4.12
  -2  12  -6   70.20    4.27
  -2  12  -6   72.14    2.98
   2 -12   6   67.07    4.29
   2  12   6   68.64    2.79
   2 -12   7   52.34    2.89
  -2  12  -7   52.68    3.68
   2  12   7   55.94    2.51
   2 -12   8   11.52    1.43
   2 -12   8   10.24    1.44
   2  12   8   11.25    1.34
  -2  12  -8   11.83    1.44
   2  12   8   13.03    1.27
  -2  12  -9   29.15    1.86
   2  12   9   29.51    1.80
   2  12   9   30.35    1.74
   2  12   9   27.13    1.51
   2 -12   9   31.48    2.11
   2 -12  10    8.00    1.05
  -2  12 -10    5.64    0.75
   2  12  10    8.51    0.94
   2 -12  10    6.51    0.94
   2  12  10    7.83    0.95
   2 -12  10    7.51    1.03
   2 -12  11   11.47    0.99
   2  12  11   11.85    0.89
   2 -12  11   11.21    0.94
   2 -12  11   11.14    0.98
  -2  13  12   43.96    1.35
  -2  13  12   18.79    1.11
  -2 -13  11    1.42    0.43
  -2  13  11    2.30    0.65
  -2  13  11    3.25    0.65
  -2 -13  11    2.13    0.61
  -2  13  10    2.08    0.77
  -2 -13  10    2.81    0.65
  -2 -13  10    2.67    0.64
  -2  13  10    4.79    0.94
  -2 -13  10    3.76    0.89
  -2 -13   9   10.88    1.11
  -2 -13   9   12.27    1.37
  -2  13   9   10.05    1.19
  -2 -13   9   11.22    1.18
  -2  13   9   11.80    1.32
  -2 -13   8    9.71    1.16
   2 -13  -8    9.03    1.77
  -2 -13   8   10.70    1.28
   2  13  -8    9.45    1.86
   2 -13  -8    8.90    1.69
  -2  13   8    7.48    1.13
  -2  13   7    3.00    1.37
  -2  13   7    3.70    0.95
   2  13  -7    3.35    1.32
  -2 -13   7    5.10    1.12
  -2 -13   7    4.90    0.93
  -2  13   7    4.01    0.97
   2 -13  -7    4.27    1.33
  -2  13   7    3.68    1.05
  -2  13   7    4.18    0.83
  -2 -13   6    6.90    1.00
  -2  13   6    4.90    1.51
   2  13  -6    4.95    1.54
  -2 -13   6    7.53    1.23
   2 -13  -6    7.08    1.57
  -2  13   6    6.30    1.08
  -2  13   6    5.50    1.12
  -2  13   6    6.03    1.00
  -2 -13   6    4.16    1.32
  -2 -13   5    4.57    0.87
  -2  13   5    4.68    1.42
   2 -13  -5    1.98    1.67
  -2 -13   5    5.00    1.38
   2  13  -5    1.99    1.28
   2 -13  -5    3.15    1.20
  -2  13   5    4.20    0.92
  -2  13   5    3.37    0.88
  -2  13   5    2.66    0.93
   2  13  -5    5.15    1.22
  -2  13   4    1.52    1.09
  -2 -13   4    2.05    0.79
   2  13  -4    2.58    1.29
  -2 -13   4    1.38    1.04
   2 -13  -4   -0.22    1.71
   2 -13  -4    1.07    0.85
  -2  13   4    0.06    1.08
  -2  13   4    1.45    0.76
  -2  13   4    1.00    0.66
   2  13  -4    2.33    1.00
   2 -13  -3   18.34    2.73
  -2  13   3   21.13    2.57
  -2 -13   3   23.76    2.59
  -2  13   3   18.36    1.49
  -2 -13   3   20.04    2.40
   2 -13  -3   23.53    2.37
   2  13  -3   24.03    2.33
  -2 -13   3   20.97    1.64
  -2  13   3   18.24    1.62
  -2  13   2   76.25    4.65
  -2 -13   2   72.44    4.43
  -2 -13   2   71.70    4.52
   2 -13  -2   75.34    4.17
   2  13  -2   71.72    4.12
  -2  13   2   71.36    2.83
  -2  13   2   74.21    4.51
  -2  13   2   67.33    3.11
   2  13  -2   73.12    2.78
   2 -13  -2   64.10    4.61
  -2 -13   1   36.27    3.10
   2  13  -1   32.85    2.82
  -2 -13   1   29.65    2.93
  -2  13   1   35.77    3.11
  -2  13   1   34.88    2.16
  -2  13   0    1.79    1.25
  -2 -13   0    5.44    1.61
   2 -13   0   17.98    3.59
  -2 -13   0    0.77    0.87
  -2  13   0    3.26    1.26
  -2  13   0    1.96    0.74
   2 -13   0   14.41    2.58
  -2  13  -1    0.59    0.94
   2 -13   1    0.97    0.57
   2 -13   1    4.51    1.52
  -2  13  -1    0.90    1.03
   2  13   1    1.91    1.08
  -2 -13  -1    1.78    1.15
   2 -13   1    0.27    2.68
  -2  13  -1    1.55    1.18
  -2  13  -2   50.08    3.73
   2 -13   2   55.59    2.63
  -2  13  -2   58.32    3.86
   2  13   2   60.49    3.78
  -2 -13  -2   51.08    3.85
  -2  13  -2   56.14    2.90
  -2  13  -2   57.84    3.98
   2 -13   2   64.23    4.13
   2 -13   3   55.99    2.79
   2  13   3   53.35    3.58
  -2  13  -3   55.83    2.89
  -2 -13  -3   51.95    3.97
   2 -13   3   58.86    4.03
  -2  13  -3   54.75    3.94
   2 -13   4   13.94    2.03
   2 -13   4   17.12    1.61
  -2  13  -4   16.55    2.17
  -2  13  -4   17.64    1.65
  -2  13  -4   13.69    2.18
   2  13   4   18.32    1.28
   2 -13   5   36.44    2.39
  -2  13  -5   35.06    3.26
  -2  13  -5   36.11    3.11
  -2  13  -5   39.83    2.29
   2 -13   5   39.06    3.25
   2  13   5   39.32    1.96
   2 -13   6    4.33    1.37
   2 -13   6    4.41    1.06
  -2  13  -6    5.53    1.46
   2  13   6    6.64    1.00
  -2  13  -6    5.10    1.48
  -2  13  -6    5.18    0.92
  -2  13  -7   13.60    1.94
  -2  13  -7   12.05    2.02
   2  13   7   12.79    1.22
  -2 -13  -7    9.15    1.97
  -2  13  -8   32.47    2.17
   2 -13   8   34.78    2.24
   2  13   8   36.49    1.89
   2  13   8   36.75    1.93
   2 -13   8   33.93    2.26
  -2  13  -9    0.21    0.58
   2  13   9   -0.06    0.58
   2  13   9    0.20    0.67
   2  13   9   -0.05    0.45
   2 -13   9    0.33    0.73
   2  13  10   12.77    1.05
   2  13  10   13.60    1.02
   2 -13  10   13.54    1.19
  -2  13 -10   11.14    0.84
   2 -13  10   12.69    1.15
   2 -13  10   14.55    1.16
   2 -13  11   11.36    0.85
   2  13  11   11.34    0.78
   2  13  11   12.68    0.83
   2 -13  11   11.69    0.80
   2 -13  11   12.01    0.85
  -2  14  11    5.87    0.75
  -2  14  11   18.67    1.01
  -2 -14  10    3.24    0.57
  -2 -14  10    2.72    0.61
  -2  14  10    4.96    0.77
  -2  14  10    3.19    0.75
  -2 -14  10    3.96    0.79
  -2 -14   9    0.85    0.53
  -2  14   9    1.36    0.74
  -2 -14   9    1.66    0.66
  -2 -14   9    2.25    0.85
  -2 -14   8    0.76    0.62
  -2 -14   8    0.59    0.69
  -2  14   8   -0.20    0.85
  -2 -14   8    0.66    0.79
  -2  14   7   57.55    4.03
  -2 -14   7   66.25    3.03
  -2 -14   7   59.84    2.52
  -2  14   7   53.54    2.44
  -2  14   7   60.17    2.88
   2  14  -7   55.52    4.06
  -2  14   7   56.45    2.67
   2 -14  -7   60.48    3.95
  -2  14   7   53.21    2.51
  -2 -14   6    2.72    0.75
  -2  14   6    2.86    1.27
   2  14  -6    1.13    1.08
   2 -14  -6    1.33    1.06
  -2  14   6    0.48    0.76
  -2  14   6    1.67    0.84
  -2  14   6    1.36    0.68
  -2 -14   5   11.80    1.18
   2 -14  -5    8.57    2.22
  -2  14   5    9.04    1.84
  -2 -14   5   10.02    1.76
   2  14  -5   12.72    2.15
  -2  14   5    9.97    1.15
   2 -14  -5    9.76    1.81
  -2  14   5   11.50    1.37
  -2  14   5   10.05    1.28
  -2 -14   4   60.97    2.58
  -2  14   4   60.71    4.31
   2 -14  -4   57.96    3.84
  -2  14   4   62.80    2.84
   2  14  -4   65.22    3.77
  -2  14   4   60.50    2.85
  -2 -14   4   57.00    3.96
  -2  14   4   61.53    2.97
   2 -14  -4   51.84    4.34
  -2  14   3  170.01    7.49
  -2 -14   3  172.93    7.37
   2 -14  -3  168.24    6.79
   2  14  -3  171.15    6.69
  -2 -14   3  165.28    7.24
  -2  14   3  164.23    4.97
  -2  14   3  169.00    5.41
   2 -14  -3  164.34    7.71
  -2  14   2  357.99   11.72
  -2 -14   2  360.37   11.48
  -2 -14   2  353.33   11.49
  -2  14   2  345.01    8.35
  -2  14   2  354.13   11.52
   2 -14  -2  372.60   10.91
   2  14  -2  377.46    8.51
   2  14  -2  369.13   10.94
  -2  14   2  340.90    9.01
   2 -14  -2  356.59   12.01
  -2 -14   1  260.61    9.46
   2 -14  -1  259.70    9.31
  -2 -14   1  263.94    9.61
   2  14  -1  272.36    9.18
  -2  14   1  252.12    9.35
   2  14  -1  280.22    7.01
   2 -14  -1  289.77   10.04
  -2  14   0  114.61    6.01
  -2 -14   0  123.98    6.09
  -2 -14   0  127.30    6.23
  -2  14   0  120.34    6.00
  -2  14   0  116.45    4.38
   2 -14   0  140.59    6.45
  -2  14  -1  114.19    5.85
   2 -14   1  107.40    3.75
  -2 -14  -1  115.43    5.94
   2  14   1  102.33    5.82
  -2 -14  -1  111.36    5.76
   2  14   1  112.29    5.44
  -2  14  -1  103.23    5.54
   2 -14   1  114.49    5.74
   2 -14   2  372.51    9.11
  -2  14  -2  370.67   11.78
   2  14   2  362.65   12.21
  -2  14  -2  373.41   11.63
   2 -14   2  361.07   11.56
   2  14   2  378.13   11.37
  -2  14  -2  388.67    9.73
  -2  14  -2  373.95   11.87
  -2  14  -3  111.05    5.71
   2 -14   3  113.30    4.18
  -2  14  -3  109.76    5.75
   2 -14   3  106.64    5.65
  -2  14  -3  114.78    4.41
   2 -14   4   24.96    1.90
  -2  14  -4   22.43    2.51
  -2  14  -4   24.56    2.61
  -2  14  -4   23.45    1.86
  -2  14  -4   23.62    2.68
   2 -14   4   22.34    2.49
   2 -14   5    5.16    1.49
  -2  14  -5    1.95    1.09
  -2  14  -5    3.55    1.19
   2 -14   5    3.63    0.98
  -2  14  -5    4.92    1.38
  -2  14  -5    2.10    0.86
   2  14   5    2.02    0.72
  -2 -14  -6   18.56    2.52
  -2  14  -6   19.08    1.49
   2 -14   6   18.39    1.72
  -2  14  -6   17.67    2.37
   2 -14   6   16.72    2.15
   2  14   6   20.94    1.65
  -2  14  -6   15.19    2.10
   2  14   6   21.40    1.43
   2  14   7    0.99    0.82
   2  14   7    0.91    0.67
   2  14   7    0.60    0.67
   2 -14   8   11.42    1.32
   2 -14   8   13.65    1.37
  -2  14  -8   11.58    1.26
   2  14   8   11.38    1.07
   2  14   8   12.70    1.08
   2  14   9    0.97    0.63
  -2  14  -9    0.66    0.56
   2  14   9    1.23    0.59
   2 -14   9    0.92    0.64
   2 -14  10    3.10    0.67
   2 -14  10    3.99    0.68
   2  14  10    4.29    0.60
   2  14  10    3.58    0.63
   2 -14  10    3.61    0.61
   2  14  11    5.15    0.48
   2 -14  11    4.88    0.47
   2  14  11    3.79    0.39
  -2  15  11   74.63    1.46
  -2  15  11   12.66    1.01
  -2  15  10   16.58    1.19
  -2 -15  10   14.93    1.00
  -2 -15  10   15.91    1.10
  -2 -15   9    0.54    0.52
  -2 -15   9    0.13    0.61
  -2 -15   8    1.24    0.76
  -2 -15   8    1.68    0.69
  -2  15   8    2.20    0.73
  -2  15   8    1.71    0.79
  -2 -15   8    1.68    0.59
  -2 -15   7   30.82    1.63
  -2 -15   7   30.84    2.02
  -2  15   7   30.16    1.88
  -2  15   7   26.75    1.58
  -2  15   7   27.38    1.88
  -2  15   6    0.49    0.74
  -2 -15   6    0.63    0.54
  -2  15   6    0.21    0.89
   2  15  -6    0.44    0.96
   2 -15  -6   -0.36    1.11
  -2  15   6    1.13    0.77
  -2  15   6    0.82    0.67
  -2  15   5   20.01    2.56
   2 -15  -5   11.20    2.75
  -2 -15   5   16.96    1.31
  -2  15   5   17.44    1.56
   2 -15  -5   16.61    2.16
  -2  15   5   16.42    1.55
   2 -15  -4    8.95    2.68
  -2  15   4    7.71    1.78
  -2 -15   4    6.70    0.93
  -2 -15   4    7.66    1.64
  -2  15   4    8.14    1.23
   2 -15  -4    7.13    1.59
  -2  15   4   10.15    1.21
  -2  15   4    8.48    1.16
  -2 -15   3   49.37    3.78
  -2 -15   3   50.96    3.87
   2 -15  -3   59.99    3.87
   2  15  -3   52.78    3.56
  -2  15   3   45.89    3.75
  -2  15   3   48.11    2.69
  -2  15   3   46.01    2.32
  -2  15   3   46.45    2.60
   2 -15  -3   59.28    4.81
  -2  15   2  130.99    6.65
  -2 -15   2  146.50    6.82
   2 -15  -2  145.73    7.07
   2  15  -2  154.02    6.41
  -2 -15   2  150.82    6.89
  -2  15   2  142.51    5.01
   2  15  -2  150.87    4.52
  -2 -15   1  504.71   14.92
   2  15  -1  534.57   14.58
  -2  15   1  539.51   15.20
  -2 -15   1  510.25   15.12
   2  15  -1  552.90   11.98
   2 -15  -1  558.99   15.48
  -2  15   0    6.05    1.69
  -2 -15   0    7.66    1.81
   2  15   0    8.43    1.99
  -2  15   0   11.23    1.41
  -2  15   0    8.02    1.76
   2  15   0    7.95    1.10
  -2  15  -1  185.18    7.80
   2 -15   1  180.02    5.23
  -2 -15  -1  184.36    7.83
   2  15   1  190.63    8.18
  -2  15  -1  176.05    5.88
  -2  15  -1  186.45    7.73
   2 -15   1  176.11    7.47
   2  15   1  190.98    5.66
  -2  15  -2  515.57   14.98
   2 -15   2  534.80   11.97
   2  15   2  539.65   15.68
   2  15   2  539.48   11.37
  -2  15  -2  535.83   12.68
  -2  15  -2  510.62   14.89
   2 -15   2  524.18   14.87
   2 -15   3    0.20    1.45
  -2  15  -3    3.35    1.37
   2 -15   3    3.14    0.93
  -2  15  -3    2.48    0.98
  -2  15  -3    1.07    1.02
   2  15   3    2.19    0.80
   2  15   4   35.65    2.04
   2 -15   4   32.92    2.12
  -2  15  -4   32.37    3.00
  -2  15  -4   33.37    3.02
  -2 -15  -4   30.71    3.09
  -2  15  -4   32.31    2.17
  -2  15  -4   26.44    2.81
   2 -15   4   28.68    2.81
   2 -15   5    0.38    0.87
   2 -15   5    0.19    0.67
   2  15   5    1.56    0.78
  -2  15  -5    0.19    0.84
  -2  15  -5    0.70    0.63
  -2 -15  -5    0.88    1.02
   2  15   5    0.82    0.82
  -2  15  -5    1.04    0.99
   2 -15   6   41.19    2.39
  -2  15  -6   38.83    2.03
   2  15   6   39.81    2.17
   2  15   6   40.59    1.81
   2  15   6   40.55    2.21
   2  15   7   14.91    1.33
   2  15   7   12.63    1.03
   2  15   7   13.16    1.21
  -2  15  -8    3.44    0.85
   2  15   8    4.40    0.69
   2  15   8    4.19    0.79
   2  15   8    3.85    0.65
   2 -15   8    3.74    0.83
  -2  15  -9    3.13    0.62
   2  15   9    3.81    0.57
   2 -15   9    3.21    0.66
   2 -15   9    3.45    0.73
   2 -15  10    8.17    0.72
   2  15  10    8.94    0.57
   2  15  10    9.58    0.73
   2 -15  10    7.62    0.68
  -2  16  10   82.23    1.98
  -2  16   9    0.52    0.59
  -2 -16   9    0.66    0.52
  -2 -16   8    8.43    1.01
  -2  16   8    7.73    1.02
  -2 -16   8    8.95    1.11
  -2  16   7    6.71    1.04
  -2 -16   7    6.30    1.05
  -2  16   7    6.27    0.94
  -2 -16   6   24.72    1.88
  -2  16   6   26.30    1.76
  -2  16   5    5.79    0.92
  -2  16   5    4.37    0.91
  -2  16   5    3.77    0.94
  -2  16   4    1.10    1.05
  -2  16   4    0.34    0.66
  -2 -16   4   -0.19    0.84
   2 -16  -4   14.96    2.37
  -2  16   4    0.83    0.74
   2 -16  -4   20.56    3.78
  -2  16   4    0.07    0.68
  -2  16   3    6.98    1.67
  -2 -16   3    7.21    1.64
  -2  16   3    5.20    1.03
  -2  16   3    4.43    0.89
  -2  16   3    5.15    1.01
  -2  16   2    3.42    1.32
  -2  16   2    2.61    0.94
  -2 -16   2    1.28    1.09
  -2  16   2    2.13    0.81
   2  16  -2    2.23    0.68
   2  16  -1   11.78    2.04
  -2  16   1   11.30    1.95
  -2  16   1   12.13    1.49
  -2 -16   1    9.63    1.94
   2  16  -1   12.63    1.26
  -2 -16   0   12.86    2.20
  -2  16   0   17.04    2.39
   2  16   0   13.80    2.27
  -2  16   0   15.59    1.69
  -2  16   0   15.88    2.23
   2  16   0   18.29    1.55
   2 -16   0   21.58    2.66
  -2  16  -1   17.45    2.42
   2 -16   1   22.50    1.52
   2  16   1   27.57    2.99
  -2  16  -1   21.62    2.53
  -2 -16  -1   22.82    2.75
   2  16   1   24.03    1.79
  -2  16  -1   19.20    1.82
   2 -16   1   21.24    2.60
   2 -16   2   14.54    1.34
  -2  16  -2   14.73    2.28
  -2 -16  -2   15.59    2.38
  -2 -16  -2   18.05    2.41
   2 -16   2   14.09    2.26
  -2  16  -2   19.74    1.81
  -2  16  -2   15.06    2.19
   2  16   2   15.90    1.51
   2 -16   3   13.45    2.01
  -2 -16  -3   18.43    2.52
  -2  16  -3   11.79    1.98
  -2 -16  -3   16.01    2.27
  -2  16  -3   16.40    2.26
  -2  16  -3   15.79    1.58
   2 -16   3   14.15    1.38
   2  16   3   13.80    1.20
   2 -16   4    4.58    0.93
  -2 -16  -4    3.72    1.63
  -2 -16  -4    2.76    1.28
  -2  16  -4    3.14    0.89
   2  16   4    2.29    0.80
   2  16   4    4.84    0.96
   2 -16   5   29.64    1.97
   2  16   5   30.31    1.77
  -2  16  -5   27.37    1.84
   2  16   5   30.37    1.94
   2 -16   6    3.26    0.82
  -2  16  -6    3.00    0.70
   2  16   6    3.57    0.84
   2  16   6    3.40    0.75
   2 -16   7   19.22    1.47
   2  16   7   17.41    1.00
   2  16   7   19.14    1.34
   2  16   7   17.71    1.30
  -2  16  -8    1.63    0.62
   2  16   8    1.01    0.43
   2  16   8    1.79    0.62
   2  16   8    1.43    0.47
   2 -16   8    0.25    0.60
   2 -16   9    3.40    0.60
   2  16   9    3.94    0.58
   2 -16   9    3.29    0.62
  -2  16  -9    2.60    0.49
  -2  17  10    1.35    0.41
  -2 -17   9    3.41    0.56
  -2  17   9    2.19    0.65
  -2 -17   8    0.05    0.48
  -2  17   8   -0.25    0.54
  -2 -17   8    0.31    0.50
  -2 -17   7    1.86    0.72
  -2  17   7    1.34    0.59
  -2  17   7    1.62    0.65
  -2 -17   6   13.05    1.30
  -2  17   6   10.44    1.11
  -2  17   6   10.94    1.17
  -2  17   5   15.89    1.31
  -2  17   4   53.92    2.30
  -2  17   4   50.07    2.47
  -2  17   4   52.65    2.61
  -2  17   3   20.21    1.66
  -2  17   3   18.90    1.63
  -2  17   2    1.10    1.05
  -2  17   2    1.52    0.85
   2  17  -2    1.36    1.05
  -2 -17   2    1.63    1.05
   2  17  -2    1.04    0.58
  -2  17   1    4.26    1.05
   2  17  -1    4.60    1.47
   2  17  -1    5.23    0.85
  -2 -17   1    3.78    1.53
   2 -17   0    0.80    1.59
  -2 -17   0    2.11    1.17
  -2 -17   0    0.86    1.24
  -2  17   0    2.44    1.19
   2  17   0    2.31    1.16
   2  17   0    3.01    0.80
  -2  17   0    3.87    1.34
  -2  17   0    2.21    0.87
  -2 -17  -1   11.70    1.98
  -2 -17  -1    8.83    1.88
   2  17   1   11.48    2.08
  -2  17  -1   12.95    1.47
  -2  17  -1   14.12    2.15
   2 -17   1    9.79    2.00
  -2  17  -1   11.65    1.94
   2  17   1   14.80    1.40
   2 -17   2    6.01    0.88
  -2 -17  -2    6.99    1.74
  -2 -17  -2    5.16    1.39
  -2  17  -2    6.86    1.21
   2  17   2    6.28    1.04
  -2  17  -3   22.86    1.51
   2 -17   3   23.01    1.59
  -2  17  -3   22.05    1.79
   2 -17   4   46.33    2.31
   2  17   4   47.53    2.06
  -2  17  -4   46.50    2.45
   2  17   4   48.13    2.41
   2 -17   5  107.23    3.74
   2  17   5  112.98    3.45
  -2  17  -5  111.53    3.69
   2  17   5  112.98    3.81
   2 -17   6    0.95    0.55
  -2  17  -6    1.07    0.48
   2  17   6    2.27    0.66
   2  17   6    1.38    0.59
  -2  17  -7    0.33    0.60
   2  17   7    0.25    0.46
   2  17   7    0.36    0.53
   2 -17   7    0.13    0.56
  -2  17  -8    5.49    0.71
   2  17   8    6.62    0.68
   2  17   8    5.09    0.57
   2 -17   8    3.89    0.70
   2 -17   9    5.37    0.54
   2  17   9    5.75    0.48
  -2 -18   9    8.92    0.56
  -2 -18   8    9.13    0.79
  -2  18   8    7.11    0.76
  -2  18   7   10.33    0.84
  -2  18   7    8.87    0.89
  -2 -18   7   11.68    1.05
  -2 -18   7    9.50    0.94
  -2 -18   6    6.76    0.95
  -2  18   6    6.42    0.83
  -2  18   6    7.71    0.92
  -2 -18   5   12.69    1.30
  -2  18   5   12.02    1.04
  -2  18   5   12.99    1.25
  -2  18   4   17.82    1.36
  -2  18   3   58.20    2.68
  -2  18   2   33.63    2.10
   2  18  -2   32.95    1.66
   2  18  -1   80.99    3.00
  -2  18   1   79.36    3.39
  -2  18   0   26.06    1.94
   2  18   0   24.23    1.65
  -2  18  -1   51.93    2.77
   2  18   1   63.12    2.74
   2 -18   2   11.76    1.03
  -2  18  -2   13.96    1.28
  -2  18  -2   13.40    1.43
   2  18   2   13.18    1.30
   2 -18   3   41.87    1.97
  -2  18  -3   41.91    1.87
  -2  18  -3   42.50    2.30
  -2  18  -4    3.42    0.82
   2  18   4    3.90    0.79
   2 -18   4    3.01    0.68
   2 -18   5    5.85    0.78
   2  18   5    6.75    0.90
  -2  18  -5    4.56    0.72
   2  18   5    4.50    0.66
  -2  18  -6    0.26    0.60
   2 -18   6    0.37    0.46
   2  18   6   -0.07    0.46
   2  18   6   -0.26    0.44
  -2  18  -7    2.68    0.62
   2 -18   7    2.78    0.62
   2  18   7    3.46    0.55
   2  18   7    3.85    0.54
   2 -18   8    9.94    0.72
  -2  18  -8    8.65    0.62
  -2 -19   8    8.34    0.59
  -2 -19   7    5.53    0.65
  -2  19   7    4.32    0.47
  -2 -19   6    2.74    0.64
  -2  19   6    2.76    0.58
  -2  19   5    5.47    0.81
  -2 -19   4    6.32    0.90
  -2  19   4    6.51    0.95
  -2  19   4    7.05    0.84
  -2  19   3   -0.13    0.56
  -2  19   2    6.96    0.99
  -2  19   1    0.08    0.66
   2  19  -1    0.27    0.47
  -2  19   0    0.72    0.66
   2  19   0    0.31    0.52
  -2  19  -1   10.70    1.09
   2  19   1   10.22    1.09
  -2  19  -2    0.75    0.65
  -2  19  -2    0.40    0.48
   2  19   2   -0.13    0.57
  -2  19  -3    0.34    0.56
   2  19   3    0.56    0.56
   2 -19   3    0.53    0.41
   2  19   4    0.46    0.54
  -2  19  -4    0.79    0.50
   2 -19   4    1.29    0.47
  -2  19  -5    0.04    0.36
   2  19   5    0.15    0.46
  -2  19  -6   -0.05    0.44
   2  19   6    0.04    0.36
   2 -19   6   -0.22    0.46
  -2  19  -7    1.33    0.40
   2  19   7    1.40    0.30
   2 -19   7    0.40    0.31
  -2 -20   7    9.83    0.61
  -2 -20   6    0.22    0.36
  -2  20   6   -0.03    0.31
  -2  20   5    1.68    0.49
  -2 -20   4    3.33    0.67
   2  20  -4    3.24    0.52
  -2  20   4    2.61    0.67
  -2 -20   3    8.74    0.91
  -2  20   3    9.82    1.03
  -2  20   3    9.29    0.90
  -2 -20   2   19.46    1.28
  -2  20   2   17.11    1.28
  -2  20   1   36.39    1.91
   2  20  -1   32.94    1.44
  -2  20   0   54.04    2.24
  -2  20   0   49.27    2.28
   2  20   0   48.67    1.95
  -2 -20  -1   25.69    1.23
  -2  20  -1   26.89    1.47
   2  20   1   26.20    1.46
  -2  20  -2   21.82    1.14
  -2  20  -2   20.86    1.39
   2  20   2   21.50    1.31
  -2  20  -3    0.73    0.50
   2  20   3    1.23    0.53
  -2  20  -4    0.98    0.51
  -2  20  -4    0.71    0.42
   2  20   5    0.57    0.36
  -2  20  -5    0.70    0.47
  -2  20  -6    0.23    0.27
   2  20   6    0.26    0.23
  -2 -21   5   -0.05    0.25
  -2  21   5    0.03    0.26
  -2 -21   4    0.03    0.32
  -2  21   4   -0.11    0.39
  -2 -21   3   15.51    0.93
  -2  21   3   13.15    0.96
  -2  21   3   14.26    0.86
   2  21  -3   13.80    0.84
  -2 -21   2    2.73    0.47
  -2  21   2    3.08    0.55
  -2 -21   1    1.39    0.39
  -2  21   1    1.95    0.55
  -2  21   1    1.24    0.50
  -2  21   0    1.16    0.47
  -2  21   0    1.13    0.52
  -2  21  -1    1.46    0.40
   2  21   1    1.83    0.43
  -2  21  -2    1.67    0.49
   2  21   2    1.82    0.44
  -2  21  -3   11.11    0.77
  -2  21  -3   11.77    0.78
   2  21   3   11.74    0.80
  -2  21  -4   15.29    0.82
  -2  22   3    7.49    0.53
  -2  22   2    1.34    0.33
  -2  22   2    0.95    0.27
   2  22  -1    0.22    0.28
  -2  22   1    0.21    0.27
  -2  22   1    0.09    0.27
  -2  22   0    3.51    0.46
   2  22   1    1.58    0.37
  -2  22  -2    0.31    0.24
   2  22   2    0.02    0.22
  -3   0  14    0.04    0.47
  -3   0  14    0.80    0.53
  -3   0  13    8.71    1.02
  -3   0  13    9.91    1.09
  -3   0  13   10.19    1.05
  -3   0  12   54.30    2.62
  -3   0  12   63.65    2.79
  -3   0  12   62.24    2.79
  -3   0  11   24.74    1.89
  -3   0  11   21.72    1.77
  -3   0  11   24.93    1.82
  -3   0  10    5.83    1.03
  -3   0  10    5.30    1.06
  -3   0  10    6.69    0.99
  -3   0  10    6.79    1.11
  -3   0   9   26.63    1.84
  -3   0   9   31.35    2.02
  -3   0   9   31.01    1.96
  -3   0   9   27.36    1.68
  -3   0   8   13.37    1.26
  -3   0   8   10.16    1.69
   3   0  -8   11.87    1.45
  -3   0   8   13.43    1.28
  -3   0   8   11.36    1.11
  -3   0   8   13.60    1.29
  -3   0   7   68.58    2.73
   3   0  -7   62.70    3.08
  -3   0   7   68.31    2.83
   3   0  -7   68.59    2.96
  -3   0   7   61.11    2.46
  -3   0   7   70.29    3.97
  -3   0   7   69.98    2.67
   3   0  -7   65.01    3.29
   3   0  -6  350.29    8.58
   3   0  -6  359.75    8.56
  -3   0   6  352.74   10.03
   3   0  -5  139.63    4.04
   3   0  -5  139.84    4.26
  -3   0   5  137.11    4.28
   3   0  -5  137.80    3.81
  -3   0   4   70.88    3.28
   3   0  -4   65.80    2.21
   3   0  -4   73.61    2.73
   3   0  -4   69.91    2.21
  -3   0   4   66.94    2.84
  -3   0   3    3.38    0.84
  -3   0   3    3.69    0.83
   3   0  -3    3.09    0.43
   3   0  -3    3.70    0.69
  -3   0   2  696.06   14.43
   3   0  -2  664.89   14.04
  -3   0   2  682.14   14.59
   3   0  -2  692.10   13.03
  -3   0   1 1291.36   24.40
   3   0  -1 1326.99   24.55
  -3   0   1 1256.58   23.84
  -3   0   1 1264.77   25.09
  -3   0   1 1258.85   23.60
   3   0  -1 1272.19   23.59
  -3   0   0  737.12   14.33
   3   0   0  727.95   15.16
  -3   0   0  744.62   14.94
   3   0   0  750.56   14.54
  -3   0   0  742.99   14.49
  -3   0  -1  367.48    7.75
   3   0   1  376.36    8.54
  -3   0  -1  362.24    8.49
  -3   0  -1  378.89    8.84
   3   0   1  376.00    8.13
   3   0   1  360.21    8.52
  -3   0  -2  593.49   13.41
  -3   0  -2  603.45   12.69
   3   0   2  600.24   13.21
  -3   0  -2  615.74   13.32
   3   0   2  622.89   12.94
  -3   0  -3  125.98    4.69
  -3   0  -3  134.60    4.39
   3   0   3  129.13    4.39
  -3   0  -3  130.26    4.32
   3   0   3  133.11    3.93
   3   0   4   37.41    2.43
  -3   0  -4   36.45    2.55
  -3   0  -4   37.48    2.11
   3   0   4   36.16    2.24
   3   0   5  176.39    5.12
   3   0   5  182.60    6.08
  -3   0  -5  178.80    6.46
  -3   0  -5  174.17    5.07
   3   0   5  177.47    5.82
  -3   0  -6  189.04    5.25
   3   0   6  193.56    6.40
  -3   0  -6  182.30    7.03
   3   0   7  126.59    4.56
  -3   0  -7  127.08    4.09
   3   0   7  127.97    4.33
   3   0   7  132.45    5.27
   3   0   8   89.59    3.82
   3   0   8   80.73    4.14
  -3   0  -8   84.16    4.92
   3   0   8   87.25    3.56
  -3   0  -8   80.35    4.82
   3   0   8   82.28    3.34
   3   0   9   98.12    4.14
  -3   0  -9   96.60    5.52
  -3   0  -9   99.39    5.38
   3   0   9  101.11    3.98
   3   0   9   94.10    3.68
   3   0  10   24.13    1.98
  -3   0 -10   19.48    2.35
  -3   0 -10   17.86    2.42
   3   0  10   22.61    1.45
   3   0  10   21.54    1.82
   3   0  10   20.24    1.62
   3   0  10   21.10    1.59
   3   0  11   50.17    2.62
   3   0  11   47.47    2.25
   3   0  11   42.65    2.40
   3   0  11   41.94    2.02
   3   0  12   13.41    1.23
   3   0  12   12.98    1.23
   3   0  12   12.71    1.01
   3   0  13    6.81    0.74
  -3   1  14    0.90    0.43
  -3  -1  14    0.68    0.49
  -3  -1  14    1.92    0.61
  -3  -1  13    2.61    0.74
  -3   1  13    1.82    0.66
  -3  -1  13    1.84    0.68
  -3   1  13    1.91    0.68
  -3   1  13    1.99    0.69
  -3  -1  13    0.98    0.61
  -3  -1  12    4.86    0.97
  -3   1  12    5.79    0.99
  -3   1  12    4.73    0.92
  -3  -1  12    5.92    1.02
  -3   1  12    4.58    0.98
  -3  -1  12    4.61    0.97
  -3   1  11  116.92    4.14
  -3  -1  11  125.66    4.32
  -3   1  11  118.58    4.19
  -3  -1  11  119.11    4.19
  -3   1  11  115.68    4.25
  -3   1  11  106.05    3.51
  -3   1  11  116.39    4.14
  -3  -1  11  120.12    4.27
  -3   1  10   12.65    1.33
  -3  -1  10   10.21    1.32
  -3   1  10   11.51    1.35
  -3  -1  10   10.25    1.33
  -3  -1  10   11.32    1.26
  -3   1  10   11.47    1.24
  -3   1  10   10.46    1.16
  -3   1  10   10.77    1.36
  -3   1  10   13.39    1.44
  -3  -1  10   11.93    1.38
  -3   1   9    4.16    0.90
  -3  -1   9    3.84    0.90
  -3   1   9    4.49    1.35
  -3   1   9    3.21    0.88
  -3  -1   9    6.13    1.07
   3   1  -9    1.91    0.88
  -3  -1   9    5.21    0.92
  -3   1   9    3.71    0.89
  -3   1   9    2.40    0.86
  -3   1   8   35.48    1.96
  -3  -1   8   35.82    2.01
  -3   1   8   34.72    2.00
  -3  -1   8   35.73    2.01
   3   1  -8   32.77    2.41
  -3  -1   8   32.11    1.97
  -3   1   8   33.68    1.98
   3  -1  -8   32.20    2.21
  -3   1   8   29.30    1.80
  -3   1   8   31.41    2.81
   3  -1  -8   31.11    2.24
  -3   1   7  103.72    3.41
   3  -1  -7  104.77    3.97
  -3   1   7  106.54    5.03
  -3   1   7  108.78    3.60
  -3  -1   7  105.32    3.57
   3  -1  -7  102.18    3.95
   3   1  -7  114.89    4.34
  -3  -1   7  107.03    3.69
  -3   1   7  104.15    3.63
   3  -1  -7  102.45    4.07
  -3  -1   7  109.33    3.58
  -3   1   7   97.79    3.33
   3   1  -7  106.36    4.25
  -3  -1   7  106.28    5.02
   3  -1  -6  816.88   17.10
  -3  -1   6  873.50   19.03
  -3   1   6  842.79   18.90
  -3  -1   6  819.55   16.51
   3  -1  -6  802.75   16.90
   3   1  -6  821.77   17.34
   3   1  -6  826.94   16.63
   3  -1  -6  867.17   17.62
   3   1  -6  827.72   17.99
  -3   1   5  120.83    3.98
   3  -1  -5  119.32    3.56
   3   1  -5  123.60    3.91
   3   1  -5  128.35    3.75
   3  -1  -5  127.14    4.22
  -3  -1   5  125.30    4.05
   3   1  -5  132.05    4.69
   3  -1  -5  126.55    3.88
  -3   1   4  182.55    5.90
   3   1  -4  186.98    4.81
   3   1  -4  190.93    4.93
   3  -1  -4  192.22    5.35
  -3  -1   4  191.31    5.45
  -3   1   4  189.01    5.38
  -3  -1   4  191.99    5.94
   3  -1  -4  189.93    4.86
  -3  -1   3    0.95    0.61
  -3   1   3    0.84    0.62
  -3   1   3    0.36    0.61
   3   1  -3    0.61    0.32
   3   1  -3    0.71    0.44
   3  -1  -3    0.35    0.49
  -3  -1   3    0.40    0.57
   3  -1  -3    1.01    0.46
  -3   1   2  930.77   18.76
   3   1  -2  963.77   18.12
   3   1  -2  904.68   17.12
   3  -1  -2  864.78   18.53
  -3   1   2  905.06   17.30
  -3  -1   2  941.04   18.72
  -3   1   2  941.48   18.04
  -3  -1   2  959.79   19.05
  -3   1   2  945.80   18.87
   3  -1  -2  968.83   17.83
   3   1  -1  146.24    4.07
  -3  -1   1  143.08    4.09
   3  -1  -1  142.58    4.37
  -3   1   1  149.99    3.94
  -3  -1   1  138.64    3.45
  -3  -1   1  142.22    3.76
  -3   1   1  142.26    3.79
  -3   1   1  151.75    4.28
  -3  -1   1  145.16    4.66
  -3   1   1  148.28    4.62
  -3  -1   1  146.65    4.35
   3  -1  -1  151.03    3.89
   3   1  -1  140.59    4.57
  -3   1   0 2293.51   41.84
  -3  -1   0 2322.16   41.61
   3   1   0 2296.09   42.26
   3  -1   0 2340.10   42.60
  -3  -1   0 2254.36   42.14
  -3   1   0 2300.04   42.19
  -3  -1   0 2240.50   42.18
  -3  -1   0 2272.36   41.58
   3   1   0 2266.79   42.78
  -3  -1   0 2177.41   42.87
  -3   1   0 2291.87   41.92
   3  -1   0 2295.85   41.98
  -3  -1  -1  212.98    5.29
  -3   1  -1  209.64    4.69
   3   1   1  216.27    5.64
   3  -1   1  204.76    5.77
  -3  -1  -1  207.65    5.14
  -3  -1  -1  200.25    5.92
  -3   1  -1  207.44    5.86
   3  -1   1  213.59    5.51
   3   1   1  201.87    5.68
  -3   1  -1  206.68    5.69
   3   1   2   75.40    3.06
  -3   1  -2   74.72    2.66
  -3  -1  -2   75.31    2.40
  -3   1  -2   76.84    3.27
  -3  -1  -2   77.52    2.95
  -3  -1  -2   74.04    3.19
  -3   1  -2   81.12    3.21
   3  -1   2   77.93    3.08
   3   1   2   82.32    3.02
   3  -1   2   76.33    2.92
   3   1   3   21.01    1.66
   3  -1   3   20.89    1.70
   3  -1   3   23.59    1.66
  -3   1  -3   21.33    1.83
  -3  -1  -3   21.86    1.65
  -3  -1  -3   22.78    1.69
  -3   1  -3   23.56    1.66
   3   1   3   23.20    1.76
   3   1   3   23.03    1.46
   3  -1   3   22.73    1.41
   3  -1   4  571.86   13.31
   3  -1   4  584.42   12.92
   3   1   4  571.52   13.16
  -3  -1  -4  586.87   13.89
  -3   1  -4  569.80   13.76
  -3  -1  -4  564.55   13.35
  -3  -1  -4  582.12   12.81
  -3   1  -4  566.52   12.49
   3   1   5   82.48    3.17
   3  -1   5   81.67    3.16
   3  -1   5   88.58    3.96
   3  -1   5   86.66    3.65
  -3  -1  -5   86.19    4.26
  -3   1  -5   83.07    4.15
  -3  -1  -5   81.49    3.23
  -3   1  -5   83.45    3.08
   3   1   5   91.14    3.91
  -3  -1  -5   84.31    4.06
   3  -1   6    2.68    0.86
   3   1   6    4.15    0.99
  -3  -1  -6    3.07    0.70
  -3  -1  -6    2.37    1.03
  -3   1  -6    3.83    1.28
  -3  -1  -6    4.20    1.21
   3   1   6    3.67    0.87
  -3   1  -6    3.16    0.78
   3   1   7   65.67    3.11
   3  -1   7   69.70    3.58
  -3  -1  -7   62.39    2.62
   3   1   7   71.57    3.82
  -3   1  -7   67.68    2.81
  -3  -1  -7   67.84    4.20
   3   1   7   64.95    2.91
   3  -1   8   53.83    2.91
   3   1   8   53.45    3.39
  -3  -1  -8   53.07    3.88
  -3   1  -8   54.03    3.86
   3   1   8   49.77    2.79
   3  -1   8   45.04    2.94
  -3  -1  -8   46.63    3.68
   3   1   8   50.71    2.67
   3  -1   8   46.91    2.65
   3   1   8   50.70    2.52
   3  -1   8   50.57    2.54
   3   1   9   -0.11    0.84
  -3  -1  -9    0.23    0.93
  -3  -1  -9    0.63    0.98
  -3   1  -9    2.25    1.12
  -3   1  -9    1.33    1.08
   3  -1   9    0.68    0.73
   3   1   9    0.57    0.85
   3  -1   9    0.50    0.83
   3  -1   9    0.62    0.67
   3   1   9    0.61    0.68
   3  -1  10   55.18    2.97
   3   1  10   54.07    2.56
   3   1  10   58.75    3.04
  -3  -1 -10   51.72    3.73
  -3   1 -10   53.82    3.77
  -3  -1 -10   61.56    4.33
   3   1  10   57.02    2.41
  -3   1 -10   51.13    3.93
   3   1  10   58.66    2.88
   3  -1  10   54.00    2.88
   3   1  10   57.87    2.70
   3  -1  10   54.79    2.65
   3   1  11   10.78    1.32
   3  -1  11   10.07    1.26
   3   1  11    9.48    0.94
   3  -1  11    9.72    1.01
   3  -1  11   10.35    1.32
   3   1  11    8.74    1.21
   3  -1  11    9.48    1.10
   3   1  11    8.37    0.95
   3   1  11    7.71    1.00
   3  -1  12    0.07    0.55
   3   1  12    0.42    0.60
   3   1  12    0.89    0.72
   3  -1  12    0.87    0.72
   3  -1  12    0.15    0.48
   3   1  13    4.44    0.63
   3  -1  13    5.11    0.69
  -3  -2  14   27.24    1.41
  -3   2  13    3.01    0.69
  -3   2  13    2.53    0.71
  -3  -2  13    2.17    0.75
  -3   2  13    2.21    0.72
  -3  -2  13    1.49    0.63
  -3   2  12   33.16    1.94
  -3  -2  12   32.82    2.09
  -3   2  12   37.34    2.07
  -3   2  12   31.16    1.97
  -3   2  12   31.51    2.01
  -3  -2  12   31.46    1.98
  -3  -2  11   71.37    3.20
  -3   2  11   72.52    3.02
  -3   2  11   77.53    3.20
  -3  -2  11   68.07    2.84
  -3   2  11   69.76    3.14
  -3   2  11   63.18    2.64
  -3   2  11   68.87    3.15
  -3  -2  11   66.51    3.08
  -3   2  10    0.16    0.63
  -3  -2  10    0.93    0.85
  -3   2  10    0.17    0.68
  -3  -2  10    0.33    0.69
  -3   2  10   -0.30    0.86
  -3   2  10   -0.09    0.92
  -3   2  10    0.19    0.78
  -3  -2  10    0.28    0.72
  -3   2   9   14.48    1.34
  -3  -2   9   13.28    1.41
  -3   2   9    9.46    1.72
  -3   2   9   15.24    1.47
  -3  -2   9   12.68    1.33
   3   2  -9   12.16    1.66
  -3   2   9   12.31    1.31
  -3   2   9   13.63    1.42
  -3   2   9   11.05    1.31
  -3   2   9   11.08    1.41
  -3   2   8    3.22    0.75
  -3   2   8    2.55    1.09
  -3  -2   8    3.62    0.87
  -3   2   8    2.54    0.80
   3   2  -8    2.73    0.91
  -3  -2   8    3.54    0.84
  -3   2   8    2.59    0.72
   3  -2  -8    2.64    0.87
  -3   2   8    2.34    0.86
  -3   2   7  106.90    3.59
  -3  -2   7  110.99    3.69
  -3   2   7  109.02    5.13
  -3   2   7  120.93    3.79
   3  -2  -7  109.42    4.31
   3   2  -7  113.36    4.39
   3   2  -7  110.37    4.46
  -3  -2   7  113.01    3.85
  -3   2   7  107.69    3.76
   3  -2  -7  110.20    4.45
  -3   2   7  115.53    3.67
   3  -2  -6   57.46    2.78
  -3  -2   6   55.18    3.36
  -3   2   6   59.09    3.49
  -3   2   6   61.66    2.41
  -3  -2   6   53.85    2.34
   3   2  -6   63.62    2.98
  -3  -2   6   59.54    2.52
   3  -2  -6   57.02    2.94
  -3   2   6   57.15    2.49
   3   2  -6   57.79    3.03
   3   2  -5   11.07    1.15
  -3   2   5   10.13    1.11
   3  -2  -5   10.32    1.22
  -3  -2   5    9.85    1.12
   3   2  -5    8.83    1.25
   3  -2  -5   10.77    1.11
   3   2  -4   38.69    1.90
   3   2  -4   35.62    1.54
   3  -2  -4   41.10    2.22
  -3  -2   4   36.05    2.10
  -3   2   4   38.14    2.10
  -3  -2   4   43.12    2.52
   3   2  -4   41.10    2.42
   3  -2  -4   39.70    1.98
   3  -2  -3    5.19    0.78
  -3  -2   3    3.92    0.90
  -3   2   3    1.41    0.75
   3   2  -3    3.06    0.56
   3   2  -3    3.18    0.90
   3   2  -3    2.88    0.49
   3  -2  -3    3.17    0.76
  -3   2   3    3.57    0.82
  -3  -2   3    2.71    0.80
  -3  -2   2   46.79    2.33
   3   2  -2   51.42    1.92
   3   2  -2   51.67    1.86
   3  -2  -2   56.05    2.56
  -3  -2   2   50.76    2.53
  -3   2   2   52.30    1.81
  -3   2   2   47.68    2.43
  -3  -2   2   51.42    1.94
  -3  -2   2   51.88    2.58
  -3   2   2   51.48    2.48
  -3   2   2   46.46    2.16
   3   2  -2   54.05    2.66
   3  -2  -2   51.07    2.19
  -3   2   1  597.18   12.55
  -3  -2   1  604.64   12.77
   3   2  -1  594.14   12.00
  -3   2   1  596.79   12.35
   3  -2  -1  571.14   12.78
   3   2  -1  581.75   11.65
  -3   2   1  589.62   11.96
  -3  -2   1  589.92   11.87
  -3  -2   1  587.97   13.05
  -3   2   1  572.55   12.85
   3   2  -1  591.79   13.01
   3  -2  -1  600.56   12.24
  -3  -2   0  437.67    9.67
   3   2   0  437.06    9.35
  -3  -2   0  425.24    9.25
   3  -2   0  428.98    9.92
  -3   2   0  418.17    9.26
  -3   2   0  429.33    9.48
  -3   2   0  426.89    9.51
  -3  -2   0  423.57   10.16
   3   2   0  426.72    9.99
   3  -2   0  432.85    9.49
  -3  -2  -1  471.63   10.35
  -3   2  -1  472.77    9.70
   3   2   1  484.61   10.38
  -3   2  -1  482.35   10.70
  -3  -2  -1  469.18   10.20
  -3   2  -1  483.63   10.81
   3   2   1  490.83   10.75
   3  -2   1  461.93   10.51
  -3   2  -2  137.03    3.22
   3   2   2  142.56    4.42
   3  -2   2  125.20    4.48
  -3  -2  -2  141.19    4.47
   3  -2   2  147.83    4.62
  -3  -2  -2  141.59    3.92
  -3   2  -2  140.51    4.69
  -3  -2  -2  136.12    4.65
  -3   2  -2  139.08    4.46
   3   2   2  141.98    4.33
   3   2   3  400.06    9.52
  -3  -2  -3  379.28    8.29
   3  -2   3  399.05    9.79
   3  -2   3  387.92    9.12
  -3  -2  -3  406.61    9.75
  -3   2  -3  387.33    9.93
   3   2   3  391.01    8.94
  -3  -2  -3  399.37    9.68
  -3   2  -3  380.93    9.15
   3  -2   3  405.10    9.80
   3  -2   3  375.30    8.70
   3   2   4  271.31    7.96
   3  -2   4  310.90    8.42
   3   2   4  286.97    8.17
  -3   2  -4  308.69    8.76
  -3  -2  -4  326.82    8.68
  -3  -2  -4  316.71    8.07
  -3   2  -4  304.28    7.54
   3  -2   4  308.09    7.77
  -3   2  -5    0.14    0.53
   3  -2   5    0.10    0.50
   3  -2   5    0.08    0.52
  -3  -2  -5   -0.28    0.74
   3  -2   5    0.12    0.64
  -3   2  -5   -0.29    0.72
  -3  -2  -5    0.36    0.52
   3   2   5    0.08    0.53
  -3   2  -5    0.13    0.42
  -3  -2  -6  263.61    8.66
   3  -2   6  266.13    8.13
  -3  -2  -6  251.83    6.41
  -3  -2  -6  256.71    8.71
   3   2   6  276.74    8.21
   3  -2   6  245.96    6.91
   3  -2   6  264.42    7.50
  -3   2  -6  247.16    6.60
   3   2   6  263.52    6.58
   3   2   7  122.72    4.45
  -3   2  -7  118.78    4.07
   3   2   7  117.31    5.19
  -3  -2  -7  125.34    5.92
   3  -2   7  126.50    4.85
   3   2   7  120.48    4.12
   3   2   8  221.73    6.56
   3  -2   8  208.97    6.51
  -3  -2  -8  204.92    8.17
  -3   2  -8  213.81    8.19
  -3   2  -8  206.63    5.81
   3   2   8  203.60    7.38
  -3  -2  -8  212.26    8.42
   3  -2   8  208.43    6.27
   3   2   8  213.64    6.15
   3   2   8  202.78    5.90
   3  -2   8  207.84    6.02
   3   2   9    1.12    0.72
   3   2   9    0.77    0.82
   3  -2   9    2.04    0.95
  -3  -2  -9    1.28    1.02
  -3   2  -9    0.40    0.96
   3   2   9    0.83    0.87
  -3  -2  -9    0.93    1.10
   3   2   9    1.58    0.91
   3  -2   9    1.22    0.84
   3   2   9    0.87    0.73
   3  -2   9    0.81    0.75
   3   2  10    7.30    1.05
  -3  -2 -10    7.76    1.75
   3  -2  10    6.16    1.18
  -3  -2 -10    8.19    1.67
   3   2  10    5.78    1.13
  -3   2 -10    5.44    1.44
   3   2  10    6.90    0.99
   3   2  10    4.98    1.07
   3  -2  10    6.70    1.25
   3   2  10    6.25    1.00
   3  -2  10    8.75    1.18
  -3   2 -10    5.38    1.47
   3  -2  11   -0.12    0.54
   3   2  11    0.22    0.56
   3   2  11    0.36    0.74
   3  -2  11    1.11    0.80
   3   2  11    0.08    0.73
   3  -2  11    0.09    0.82
   3   2  11   -0.48    0.71
   3  -2  11   -0.07    0.63
   3   2  11    0.12    0.57
   3  -2  12   32.79    1.85
   3  -2  12   29.14    1.47
   3   2  12   28.63    1.68
   3  -2  12   31.92    1.84
   3   2  13    0.28    0.48
   3  -2  13    0.63    0.47
  -3  -3  14    5.90    0.73
  -3   3  13    1.01    0.57
  -3  -3  13    1.22    0.68
  -3   3  13    0.74    0.53
  -3   3  13    2.48    0.83
  -3   3  13    0.78    0.63
  -3   3  12    2.24    0.72
  -3   3  12    3.95    0.89
  -3  -3  12    3.02    0.93
  -3   3  12    2.33    0.88
  -3   3  12    2.33    0.87
  -3  -3  12    2.55    0.80
  -3   3  11   36.30    2.07
  -3  -3  11   39.20    2.37
  -3   3  11   36.13    2.12
  -3  -3  11   34.31    2.16
  -3  -3  11   35.91    2.03
  -3   3  11   32.05    1.95
  -3  -3  11   36.21    2.21
  -3   3  11   39.77    2.38
  -3   3  11   38.25    2.30
  -3   3  10   24.79    1.74
  -3  -3  10   24.60    1.92
  -3   3  10   26.30    2.74
  -3   3  10   27.03    1.92
  -3  -3  10   22.32    1.79
  -3  -3  10   24.74    1.80
  -3   3  10   20.08    1.73
  -3   3  10   25.98    2.03
  -3   3  10   26.81    1.98
  -3  -3  10   25.13    1.89
  -3   3   9  132.83    4.23
  -3  -3   9  145.73    4.72
  -3   3   9  132.14    6.28
  -3   3   9  149.85    4.59
  -3  -3   9  147.15    4.61
  -3   3   9  118.17    4.33
  -3  -3   9  138.95    4.60
   3   3  -9  129.45    5.64
  -3   3   9  136.66    4.45
   3  -3  -9  133.83    5.49
  -3   3   9  126.94    4.27
  -3   3   9  129.48    4.65
  -3   3   9  140.10    4.66
   3  -3  -8   43.08    2.84
  -3  -3   8   46.62    2.39
  -3   3   8   46.74    3.45
  -3   3   8   49.04    2.40
  -3  -3   8   52.43    2.45
  -3  -3   8   51.38    2.53
   3   3  -8   49.54    3.13
  -3   3   8   46.77    2.38
   3  -3  -8   45.81    2.98
  -3   3   8   46.69    2.33
  -3   3   8   41.64    2.28
  -3   3   8   47.38    2.48
  -3  -3   7    1.01    0.63
   3  -3  -7    1.44    0.73
  -3   3   7    0.67    0.93
  -3   3   7    0.73    0.61
   3   3  -7    1.13    0.77
  -3  -3   7    0.91    0.64
  -3   3   7    0.67    0.59
  -3   3   7    0.69    0.68
   3   3  -7    1.49    0.70
  -3   3   7    0.96    0.74
   3  -3  -7    1.68    0.82
  -3  -3   7    0.81    0.64
  -3   3   7    1.42    0.79
   3  -3  -6   14.73    1.49
  -3  -3   6   11.29    1.09
  -3   3   6   12.21    1.73
  -3   3   6   12.21    1.11
  -3  -3   6   12.39    1.12
  -3   3   6   12.80    1.20
  -3   3   6    9.20    1.11
   3   3  -6   10.13    1.28
  -3   3   6   11.89    1.18
  -3   3   6   12.04    1.16
   3  -3  -6   11.73    1.44
   3   3  -6   12.23    1.43
  -3  -3   6   12.71    1.23
   3   3  -5  469.71   10.96
  -3   3   5  473.91   10.70
   3  -3  -5  472.64   11.35
  -3  -3   5  457.22   10.68
   3   3  -5  477.65   11.42
   3  -3  -5  472.28   11.03
   3   3  -4   23.00    1.58
   3  -3  -4   22.81    1.79
  -3   3   4   21.05    1.60
  -3  -3   4   20.68    1.63
   3   3  -4   25.18    1.90
   3  -3  -4   24.80    1.69
   3   3  -3  225.19    4.93
   3   3  -3  229.12    5.84
  -3   3   3  239.51    6.78
   3  -3  -3  237.31    6.50
  -3  -3   3  228.79    6.49
  -3   3   3  232.79    6.29
   3  -3  -3  242.11    6.30
   3   3  -3  225.07    6.58
  -3   3   2  101.61    3.79
  -3  -3   2  104.91    3.28
   3   3  -2  100.19    3.16
   3  -3  -2  105.30    3.83
  -3   3   2  102.89    2.99
  -3  -3   2   98.83    3.80
  -3   3   2   98.29    3.61
  -3   3   2   96.07    3.53
   3   3  -2  104.20    2.78
   3   3  -2   87.68    3.67
   3  -3  -2   94.51    3.49
  -3  -3   2  101.38    3.83
  -3   3   1   61.73    2.71
  -3   3   1   62.29    2.65
   3  -3  -1   55.20    2.74
  -3   3   1   63.07    2.34
  -3  -3   1   57.31    2.34
  -3  -3   1   58.22    2.70
  -3  -3   1   58.39    2.85
  -3   3   1   60.86    2.74
   3   3  -1   58.75    2.09
   3   3  -1   56.41    2.74
   3   3  -1   57.49    2.23
   3  -3  -1   63.44    2.59
  -3   3   0  359.07    8.38
   3   3   0  365.53    8.13
   3   3   0  362.19    8.21
  -3   3   0  363.08    8.45
  -3  -3   0  376.54    8.55
  -3   3   0  366.68    8.70
  -3  -3   0  366.55    9.13
  -3  -3   0  373.30    8.74
   3   3   0  373.94    8.97
   3  -3   0  363.29    8.62
  -3   3  -1  119.60    3.53
   3   3   1  120.71    3.74
  -3   3  -1  117.23    4.03
  -3  -3  -1  126.00    3.92
   3   3   1  120.42    4.06
  -3   3  -1  117.52    4.04
   3  -3   1  120.43    4.08
  -3  -3  -1  127.93    4.09
   3   3   2    9.98    1.11
  -3   3  -2    9.88    0.80
   3   3   2    8.52    1.02
  -3  -3  -2   13.31    1.31
   3  -3   2   11.07    1.28
  -3   3  -2    8.15    1.14
   3  -3   2    9.05    0.93
  -3   3  -2    9.02    1.11
  -3  -3  -2    6.84    1.14
   3  -3   2   11.77    1.30
  -3  -3  -2    7.11    0.89
   3   3   3  190.35    5.72
   3  -3   3  187.66    5.94
   3  -3   3  183.78    5.15
  -3  -3  -3  172.36    4.92
  -3   3  -3  176.91    6.04
   3   3   3  197.63    5.41
  -3  -3  -3  194.07    5.94
  -3   3  -3  192.19    5.43
  -3  -3  -3  192.42    5.98
   3  -3   3  202.02    6.14
   3  -3   4  583.85   13.59
  -3   3  -4  594.17   14.05
   3  -3   4  578.93   12.55
   3   3   4  559.73   12.36
  -3  -3  -4  561.49   13.78
   3  -3   4  586.20   13.83
  -3  -3  -4  576.32   13.25
  -3   3  -4  579.83   12.48
   3   3   5    1.87    0.67
   3  -3   5    1.52    0.78
  -3   3  -5    1.48    0.95
  -3  -3  -5    1.79    0.93
  -3   3  -5    1.11    0.60
  -3  -3  -5    2.08    0.73
  -3   3  -5    2.46    0.59
   3  -3   5    2.40    0.67
   3  -3   6  140.39    4.73
  -3  -3  -6  143.33    4.21
  -3   3  -6  139.41    4.53
   3  -3   6  141.27    4.89
  -3  -3  -6  150.73    6.30
   3  -3   6  150.76    5.73
   3   3   6  143.29    4.30
   3   3   7   74.53    3.34
   3   3   7   68.18    3.92
  -3   3  -7   68.41    4.28
   3  -3   7   78.19    3.10
   3  -3   7   75.34    3.48
  -3   3  -7   68.71    2.99
  -3  -3  -7   71.92    4.48
   3   3   7   72.37    3.02
   3   3   8    0.09    0.62
   3   3   8    0.75    0.78
  -3   3  -8    0.57    0.64
  -3  -3  -8    0.22    1.04
  -3  -3  -8    0.21    1.14
  -3   3  -8    0.20    0.97
   3  -3   8    0.11    0.80
   3   3   8    0.34    0.90
   3   3   8    0.95    0.83
   3   3   8   -0.08    0.73
   3  -3   8    0.44    0.78
   3  -3   9   23.06    2.02
   3  -3   9   26.32    1.89
  -3  -3  -9   31.66    3.04
  -3   3  -9   25.46    2.67
  -3  -3  -9   28.86    3.02
   3   3   9   22.61    2.34
   3   3   9   24.67    2.03
   3   3   9   26.49    1.87
   3   3   9   26.88    1.99
   3  -3   9   29.77    2.19
   3   3   9   26.29    1.89
   3   3  10   65.06    3.19
  -3  -3 -10   57.45    4.03
  -3  -3 -10   61.21    4.40
  -3   3 -10   60.33    3.92
   3  -3  10   61.06    3.17
   3   3  10   66.44    2.73
   3   3  10   64.70    2.97
   3  -3  10   65.54    3.21
   3   3  10   61.19    2.79
   3  -3  10   63.33    2.90
   3   3  10   65.78    2.83
   3  -3  11  107.38    3.98
   3   3  11  106.48    3.32
   3   3  11  102.53    3.34
   3   3  11  100.74    3.63
   3  -3  11  103.43    3.87
   3   3  11   97.58    3.38
   3  -3  11  103.62    3.55
   3  -3  11  101.57    3.28
   3  -3  12   76.51    2.90
   3   3  12   71.14    2.64
   3  -3  12   80.51    2.95
   3  -3  12   68.56    2.40
   3   3  12   77.07    2.35
   3  -3  13   24.38    1.21
   3   3  13   21.52    1.03
   3  -3  13   25.36    1.27
  -3  -4  14    6.51    0.73
  -3  -4  13    0.72    0.62
  -3   4  13    0.72    0.58
  -3  -4  13    0.67    0.58
  -3   4  13    1.77    0.68
  -3   4  12    8.74    1.06
  -3  -4  12    9.12    1.12
  -3  -4  12    9.61    1.23
  -3   4  12    7.44    1.16
  -3   4  12    6.37    1.04
  -3  -4  12    9.10    1.12
  -3  -4  11   37.36    2.31
  -3   4  11   39.30    2.15
  -3  -4  11   36.70    2.15
  -3  -4  11   33.66    1.98
  -3   4  11   34.95    2.29
  -3   4  11   35.66    2.07
  -3   4  11   34.89    2.22
  -3  -4  11   36.62    2.20
  -3  -4  10   38.11    2.37
  -3   4  10   35.91    3.21
  -3   4  10   37.93    2.17
  -3  -4  10   41.69    2.28
  -3  -4  10   37.21    2.23
  -3   4  10   34.54    2.26
  -3   4  10   36.74    2.39
  -3   4  10   37.24    2.32
  -3  -4  10   37.35    2.29
  -3   4  10   36.39    2.11
  -3  -4   9  192.83    5.77
  -3   4   9  199.50    5.58
  -3  -4   9  194.47    5.58
  -3  -4   9  195.53    5.71
   3   4  -9  181.01    7.00
  -3   4   9  192.38    5.50
   3  -4  -9  182.55    6.86
  -3   4   9  182.10    7.57
  -3   4   9  161.60    5.38
  -3   4   9  178.45    5.78
  -3   4   9  190.02    5.74
  -3   4   9  180.40    5.44
   3  -4  -8   17.59    1.94
  -3  -4   8   19.73    1.61
  -3   4   8   18.70    2.28
  -3   4   8   15.12    1.51
  -3   4   8   22.44    1.63
  -3  -4   8   23.00    1.63
  -3   4   8   19.76    1.58
  -3  -4   8   21.59    1.67
   3   4  -8   20.81    2.16
  -3   4   8   18.74    1.54
   3  -4  -8   19.06    2.04
  -3   4   8   18.88    1.68
   3  -4  -7   94.61    4.34
  -3  -4   7  104.11    3.60
  -3   4   7   92.79    4.87
  -3   4   7   99.37    3.43
  -3  -4   7   99.34    3.47
  -3  -4   7  109.40    3.79
   3   4  -7  101.16    4.52
  -3   4   7   98.88    3.59
   3   4  -7  101.12    4.08
   3  -4  -7   95.42    4.47
  -3   4   7   90.81    3.45
  -3   4   7  102.93    3.70
  -3   4   7   95.07    3.52
   3  -4  -6   10.12    1.36
  -3  -4   6   10.79    1.08
  -3   4   6   11.56    1.67
  -3   4   6   14.22    1.15
  -3  -4   6   11.13    1.07
  -3   4   6    9.85    1.16
  -3   4   6   13.27    1.29
  -3  -4   6   12.21    1.18
   3   4  -6   11.12    1.43
  -3   4   6    9.49    1.08
   3  -4  -6   10.79    1.48
   3   4  -6   11.74    1.35
  -3   4   6    9.23    1.12
  -3   4   5   85.95    4.20
   3   4  -5   83.09    3.60
   3  -4  -5   83.91    3.83
  -3  -4   5   80.30    3.32
  -3   4   5   89.09    3.42
   3   4  -5   87.56    3.75
   3  -4  -5   84.16    3.66
   3   4  -4   46.55    2.41
   3  -4  -4   46.71    2.65
  -3  -4   4   41.59    2.38
  -3   4   4   44.02    2.34
  -3  -4   4   44.12    2.73
   3   4  -4   48.78    2.67
   3  -4  -4   49.08    2.59
  -3   4   3   33.57    2.28
  -3  -4   3   37.05    2.00
   3   4  -3   34.34    1.93
   3  -4  -3   35.62    2.24
  -3  -4   3   39.12    2.31
  -3   4   3   34.76    2.07
   3  -4  -3   34.41    2.11
  -3   4   3   37.88    2.26
   3   4  -3   34.96    2.25
  -3   4   2   70.28    3.17
   3   4  -2   67.40    1.88
   3   4  -2   63.92    2.66
  -3  -4   2   64.02    2.72
   3  -4  -2   68.55    3.09
  -3   4   2   75.04    2.56
  -3  -4   2   63.70    3.07
  -3   4   2   68.75    2.93
  -3  -4   2   56.67    2.95
  -3   4   2   62.77    2.90
   3  -4  -2   60.65    2.89
  -3   4   1  271.72    7.17
   3   4  -1  266.56    5.95
   3   4  -1  266.55    6.69
  -3   4   1  265.82    6.59
  -3  -4   1  277.33    6.96
   3   4  -1  281.96    7.36
  -3   4   1  266.54    7.12
  -3  -4   1  270.39    7.32
  -3   4   1  271.44    7.17
   3  -4  -1  276.48    7.16
   3   4   0    0.62    0.62
   3  -4   0    1.67    0.72
  -3   4   0    0.67    0.56
   3   4   0    0.99    0.54
   3   4   0    0.30    0.41
  -3   4   0    0.73    0.52
  -3   4   0    0.52    0.61
   3  -4   0    1.15    0.93
  -3  -4   0    0.51    0.61
  -3  -4   0    0.08    0.56
   3   4   1   30.61    1.67
   3  -4   1   33.86    2.27
   3   4   1   31.17    1.89
  -3   4  -1   28.58    1.66
   3   4   1   26.49    1.84
  -3   4  -1   27.75    1.86
  -3   4  -1   32.26    1.98
  -3  -4  -1   31.60    1.94
   3  -4   1   30.49    1.99
  -3  -4  -1   31.37    2.00
   3  -4   2    5.63    1.06
  -3   4  -2    4.17    0.65
  -3   4  -2    5.26    1.01
   3  -4   2    5.36    1.05
   3  -4   2    4.72    0.68
  -3  -4  -2    5.68    1.00
  -3  -4  -2    4.87    0.83
  -3   4  -2    3.67    0.82
   3   4   2    5.05    0.90
  -3   4  -3   26.45    1.75
   3  -4   3   22.32    1.95
  -3  -4  -3   28.70    2.17
  -3  -4  -3   27.33    1.73
   3   4   3   25.73    1.77
  -3   4  -3   28.48    2.17
   3   4   3   29.97    2.12
  -3  -4  -3   27.78    2.04
   3  -4   3   27.18    1.55
   3  -4   3   27.20    2.11
   3  -4   4   12.59    1.53
  -3  -4  -4   10.31    1.05
   3   4   4   12.23    1.22
  -3  -4  -4   14.34    1.65
   3  -4   4   14.77    1.20
  -3   4  -4   13.44    1.67
   3   4   4   12.42    1.50
  -3  -4  -4   17.71    1.67
  -3   4  -4   14.14    1.23
   3  -4   4   13.32    1.62
   3   4   5    1.61    0.76
   3   4   5    1.85    0.85
   3  -4   5    0.91    0.81
  -3   4  -5    3.31    1.03
   3  -4   5    1.62    0.60
  -3  -4  -5    2.36    0.61
  -3   4  -5    0.98    0.57
  -3  -4  -5    1.20    0.71
  -3  -4  -5    1.56    0.62
  -3  -4  -5    1.58    0.98
  -3   4  -5    1.34    0.68
   3  -4   6   17.96    1.93
  -3  -4  -6   21.98    1.41
  -3  -4  -6   19.61    2.28
  -3   4  -6   17.51    1.51
  -3   4  -6   18.91    1.37
   3  -4   6   19.92    1.58
   3   4   6   18.45    1.49
   3   4   7  125.96    4.49
  -3   4  -7  109.84    5.51
  -3  -4  -7  126.83    6.10
  -3   4  -7  109.91    4.05
   3   4   7  113.78    3.92
   3  -4   7  110.22    3.97
   3   4   7  115.56    4.11
   3   4   8  138.23    4.88
  -3   4  -8  126.77    5.73
  -3  -4  -8  120.66    6.15
  -3   4  -8  125.07    5.99
  -3  -4  -8  123.57    6.30
  -3   4  -8  121.61    4.29
   3  -4   8  130.24    4.86
   3   4   8  132.55    4.41
   3   4   8  117.33    4.18
   3  -4   8  125.92    4.42
   3   4   8  129.99    4.44
   3   4   9   23.57    2.00
   3  -4   9   28.86    2.19
  -3  -4  -9   23.24    2.74
  -3   4  -9   24.52    2.63
  -3   4  -9   25.29    1.68
  -3  -4  -9   21.75    2.61
   3   4   9   26.28    2.50
   3   4   9   26.26    1.90
   3  -4   9   29.37    2.16
   3   4   9   25.01    1.78
   3  -4   9   27.22    1.95
   3   4   9   26.83    1.86
   3   4  10   14.67    1.58
   3  -4  10   15.08    1.62
   3   4  10   15.55    1.38
   3   4  10   15.69    1.47
   3  -4  10   17.70    1.69
   3   4  10   15.87    1.42
   3  -4  10   14.57    1.43
   3   4  10   16.13    1.38
   3  -4  11    2.98    0.65
   3  -4  11    2.78    0.88
   3  -4  11    4.25    1.05
   3   4  11    2.80    0.77
   3   4  11    3.01    0.82
   3   4  11    3.48    0.76
   3  -4  11    2.68    0.79
   3   4  11    3.53    0.73
   3   4  12    2.90    0.59
   3  -4  12    1.31    0.64
   3   4  12    1.20    0.61
   3  -4  12    1.99    0.73
   3  -4  12    1.60    0.53
   3  -4  13    3.52    0.50
   3  -4  13    3.09    0.57
  -3  -5  14   -0.08    0.40
  -3   5  13    2.94    0.63
  -3  -5  13    3.19    0.68
  -3  -5  13    2.53    0.73
  -3  -5  12   21.82    1.68
  -3   5  12   22.49    1.48
  -3  -5  12   25.33    1.64
  -3   5  12   25.28    1.58
  -3   5  12   23.94    1.79
  -3   5  12   23.43    1.68
  -3  -5  12   22.30    1.55
  -3  -5  11    3.80    0.99
  -3   5  11    4.53    0.90
  -3   5  11    2.23    0.99
  -3  -5  11    3.93    0.84
  -3   5  11    2.27    0.91
  -3  -5  11    4.12    0.94
  -3   5  11    3.90    1.00
  -3   5  11    4.09    1.13
  -3  -5  11    4.45    0.98
  -3   5  10   14.25    1.46
  -3  -5  10   16.76    1.66
  -3   5  10   12.97    2.08
  -3   5  10   17.32    1.48
  -3  -5  10   14.62    1.46
  -3   5  10   15.47    1.63
   3   5 -10   12.47    1.94
  -3  -5  10   16.57    1.49
   3  -5 -10   11.84    1.77
  -3   5  10   13.91    1.61
  -3   5  10   14.70    1.57
  -3  -5  10   15.61    1.53
  -3   5   9    6.65    1.10
   3  -5  -9    7.99    1.51
  -3   5   9    4.97    1.44
  -3  -5   9    8.57    1.16
   3   5  -9    6.10    1.45
  -3  -5   9    6.68    1.15
  -3   5   9    6.23    1.05
   3  -5  -9    7.03    1.47
  -3   5   9    5.85    1.11
  -3   5   9    4.75    1.12
  -3   5   9    5.98    1.30
  -3  -5   9    6.02    1.16
  -3   5   9    6.93    1.17
  -3  -5   8    2.70    0.86
   3  -5  -8    3.00    1.05
  -3   5   8    2.38    1.23
  -3   5   8    1.56    0.69
  -3  -5   8    2.16    0.77
   3   5  -8    2.66    1.03
  -3  -5   8    3.29    0.87
  -3   5   8    2.28    0.79
   3  -5  -8    2.66    1.09
  -3   5   8    2.53    0.85
  -3   5   8    1.12    0.83
  -3   5   8    1.56    0.97
  -3   5   8    2.93    0.88
  -3   5   7   65.81    2.95
  -3  -5   7   77.85    3.07
  -3   5   7   67.68    4.19
  -3   5   7   74.69    2.86
  -3  -5   7   76.66    2.91
  -3  -5   7   75.55    3.13
   3   5  -7   71.35    3.89
  -3   5   7   69.70    2.97
   3  -5  -7   73.46    4.00
  -3   5   7   68.05    2.98
   3   5  -7   76.68    3.49
   3  -5  -7   71.73    3.86
  -3   5   7   69.85    3.11
   3  -5  -6  103.62    4.53
  -3  -5   6  111.52    3.66
  -3   5   6  106.88    5.09
  -3   5   6  111.47    3.42
  -3  -5   6  111.48    3.48
  -3  -5   6  105.41    3.67
   3   5  -6  106.71    4.61
  -3   5   6  103.89    3.68
   3  -5  -6  107.06    4.75
  -3   5   6  109.50    4.01
  -3   5   6  102.00    3.63
   3   5  -6  109.89    4.36
  -3   5   6  104.98    3.72
  -3   5   6   92.48    3.46
  -3   5   5   98.31    4.61
  -3   5   5   83.66    3.10
  -3  -5   5   94.64    3.31
   3   5  -5  101.85    4.20
   3  -5  -5  102.86    4.38
  -3  -5   5   94.51    3.75
   3   5  -5  104.59    4.22
  -3   5   5   98.97    3.79
  -3   5   5   92.61    3.29
   3  -5  -5   98.94    4.18
  -3   5   4   60.30    2.88
   3  -5  -4   64.00    3.31
  -3  -5   4   62.89    3.06
  -3  -5   4   56.67    3.24
   3   5  -4   67.18    3.26
   3  -5  -4   63.66    3.19
  -3   5   3   30.37    2.25
  -3  -5   3   29.55    1.94
   3   5  -3   30.98    1.98
  -3   5   3   28.46    2.11
   3  -5  -3   33.32    2.26
  -3  -5   3   25.99    2.15
  -3   5   3   29.24    1.96
  -3  -5   3   30.69    2.14
   3   5  -3   33.84    2.20
   3  -5  -3   30.38    2.10
  -3   5   2  257.45    7.40
   3   5  -2  256.46    6.88
  -3  -5   2  267.68    7.02
  -3   5   2  268.22    6.54
  -3   5   2  262.60    7.04
  -3   5   2  258.28    7.34
   3  -5  -2  257.49    7.37
  -3   5   1   35.48    2.17
  -3   5   1   35.82    2.11
  -3  -5   1   32.31    2.18
   3   5  -1   32.31    1.94
   3  -5  -1   28.06    2.18
  -3   5   1   34.75    1.90
  -3  -5   1   39.56    2.20
  -3   5   1   29.27    2.06
   3   5  -1   29.80    2.05
   3  -5  -1   35.52    2.24
  -3  -5   0  188.40    5.61
   3  -5   0  170.79    5.70
   3   5   0  184.09    5.37
   3   5   0  179.37    5.56
  -3   5   0  174.02    5.31
  -3  -5   0  172.12    5.54
  -3   5   0  171.54    5.54
  -3   5   0  176.84    5.25
   3  -5   0  178.62    5.56
  -3   5  -1   92.95    3.46
  -3  -5  -1   98.45    3.80
   3  -5   1   94.13    3.96
   3   5   1   91.13    3.65
  -3   5  -1   97.56    3.75
  -3   5  -1   95.81    3.64
   3   5   1   89.50    3.67
  -3  -5  -1   98.93    3.91
   3  -5   1   95.56    3.90
  -3  -5  -2  127.60    4.70
  -3  -5  -2  120.73    4.32
   3  -5   2  125.54    4.63
   3  -5   2  117.64    3.37
  -3   5  -2  121.23    4.54
  -3   5  -2  111.71    3.86
  -3   5  -2  124.90    4.21
   3   5   2  119.06    4.32
   3  -5   2  120.52    4.64
  -3  -5  -3  776.54   17.74
  -3   5  -3  735.76   15.91
   3  -5   3  813.22   17.53
  -3   5  -3  797.89   17.66
  -3   5  -3  811.89   16.64
  -3  -5  -3  772.14   16.76
   3   5   3  781.43   16.85
   3   5   3  870.21   17.80
   3  -5   3  786.01   15.62
   3  -5   3  820.57   17.87
   3   5   4   84.82    3.15
   3  -5   4   78.28    3.06
   3  -5   4   86.32    3.99
   3   5   4   83.09    3.87
  -3  -5  -4   76.10    3.99
  -3   5  -4   76.85    3.31
  -3  -5  -4   79.61    3.32
  -3   5  -4   81.66    4.04
  -3  -5  -4   86.79    3.86
  -3   5  -4   75.13    3.07
   3   5   4   77.80    3.33
   3  -5   4   83.15    2.88
  -3   5  -4   85.85    3.24
   3  -5   4   71.14    3.92
   3  -5   5  510.08   12.82
   3   5   5  521.22   13.00
  -3  -5  -5  505.32   10.86
  -3   5  -5  510.33   12.34
  -3  -5  -5  530.28   13.73
  -3   5  -5  502.54   13.33
  -3  -5  -5  524.71   12.56
  -3   5  -5  511.24   11.12
  -3   5  -5  480.56   11.44
   3   5   5  508.85   11.29
   3   5   6    3.72    0.82
  -3   5  -6    2.69    0.83
   3   5   6    2.73    1.00
  -3   5  -6    3.04    0.96
   3  -5   6    3.63    1.10
  -3  -5  -6    2.86    1.27
  -3   5  -6    3.05    0.72
   3  -5   6    2.34    0.74
   3   5   7   22.66    1.87
  -3   5  -7   20.39    2.15
  -3  -5  -7   20.06    2.47
  -3   5  -7   14.79    2.12
  -3   5  -7   17.90    1.62
   3   5   7   18.85    2.17
   3   5   7   17.70    1.44
   3  -5   7   20.41    1.65
   3   5   7   18.20    1.58
   3  -5   8   11.56    1.54
   3   5   8   14.78    1.62
  -3  -5  -8   13.81    2.15
  -3   5  -8   12.25    1.91
   3  -5   8   13.59    1.44
  -3   5  -8   12.78    1.38
   3   5   8   12.93    1.81
  -3  -5  -8   13.12    2.15
   3   5   8   14.56    1.38
   3   5   8   13.20    1.37
   3   5   8   13.32    1.42
   3   5   9  119.94    4.51
   3  -5   9  111.33    4.51
  -3  -5  -9  109.64    5.99
  -3  -5  -9  106.14    5.72
  -3   5  -9  119.11    5.68
  -3   5  -9  103.67    3.75
   3   5   9  111.61    3.98
   3  -5   9  111.06    4.38
   3   5   9  105.29    3.87
   3  -5   9  111.87    4.12
   3   5   9  110.58    4.06
   3  -5  10   31.48    2.22
   3   5  10   34.78    1.99
   3   5  10   34.24    1.96
   3   5  10   36.77    1.99
   3   5  10   37.01    2.08
   3  -5  10   33.77    2.33
   3  -5  10   35.12    2.10
   3  -5  11   10.92    1.27
   3   5  11    9.81    1.03
   3   5  11    8.34    1.01
   3   5  11    8.42    0.96
   3  -5  11    8.23    1.00
   3   5  11   10.63    1.00
   3  -5  12   15.49    1.23
   3   5  12   15.44    1.02
   3   5  12   13.79    1.01
   3  -5  12   14.27    0.95
   3  -5  13    2.79    0.44
   3  -5  13    3.53    0.54
  -3  -6  14    2.40    0.47
  -3  -6  13    1.12    0.57
  -3  -6  13    1.98    0.57
  -3  -6  12   10.57    1.21
  -3   6  12   12.34    1.07
  -3  -6  12   11.44    1.10
  -3  -6  12   10.06    0.98
  -3  -6  12   11.09    1.13
  -3  -6  11    4.97    1.09
  -3   6  11    1.64    0.98
  -3   6  11    4.32    0.85
  -3  -6  11    4.57    0.87
  -3  -6  11    4.49    0.86
  -3   6  11    4.71    1.00
  -3   6  11    5.36    1.22
  -3   6  11    4.61    1.00
  -3  -6  11    4.05    0.90
  -3   6  10   23.07    1.60
  -3  -6  10   22.72    1.62
  -3   6  10   22.23    2.57
   3   6 -10   18.47    2.31
  -3  -6  10   21.34    1.80
   3  -6 -10   16.15    2.09
  -3  -6  10   20.46    1.69
  -3   6  10   18.20    1.62
  -3   6  10   19.52    1.72
  -3   6  10   21.02    1.93
  -3   6  10   17.57    1.69
  -3  -6  10   20.24    1.66
   3  -6  -9    1.58    1.05
  -3   6   9    2.11    1.18
  -3  -6   9    1.23    0.79
   3   6  -9    1.50    1.03
  -3  -6   9    0.45    0.70
  -3  -6   9    1.34    0.85
  -3   6   9    1.15    0.68
   3  -6  -9    0.72    0.91
  -3   6   9    0.63    0.84
  -3   6   9    0.92    0.92
  -3   6   9   -0.10    1.02
  -3   6   9    0.38    0.87
  -3  -6   8    0.27    0.73
   3  -6  -8    0.51    0.92
  -3   6   8    0.21    0.95
  -3   6   8    0.68    0.66
  -3  -6   8    0.22    0.64
   3   6  -8    0.18    0.82
  -3  -6   8    0.44    0.74
  -3   6   8    0.08    0.61
   3  -6  -8    0.53    0.80
  -3   6   8    0.09    0.79
  -3   6   8    0.09    0.86
  -3   6   8    0.48    0.87
  -3   6   8    0.09    0.77
   3  -6  -7    3.45    1.11
  -3   6   7    3.27    1.25
  -3   6   7    3.82    0.75
  -3  -6   7    3.14    0.74
   3   6  -7    1.13    0.85
  -3  -6   7    3.17    0.86
  -3   6   7    3.36    0.87
   3  -6  -7    2.98    1.04
  -3  -6   7    3.69    0.86
  -3   6   7    2.61    0.92
  -3   6   7    2.41    0.90
  -3   6   7    3.99    1.01
   3   6  -7    3.53    0.90
  -3   6   6  410.75   11.73
  -3  -6   6  412.08    8.89
  -3  -6   6  400.22    9.33
   3   6  -6  395.55   10.87
  -3   6   6  390.69    9.35
   3  -6  -6  393.33   11.05
  -3   6   6  387.09    9.30
   3   6  -6  415.88   10.43
  -3   6   6  397.63    9.88
  -3   6   6  384.84    9.41
   3  -6  -6  406.61   10.93
  -3   6   5  172.51    6.55
   3   6  -5  171.41    5.91
   3  -6  -5  164.01    6.06
  -3   6   5  159.78    4.68
  -3  -6   5  170.35    6.27
  -3  -6   5  167.29    5.45
  -3   6   5  164.99    5.39
  -3   6   5  152.66    4.74
   3   6  -5  177.00    5.85
  -3   6   5  159.32    4.89
   3  -6  -5  162.71    5.94
  -3  -6   4   45.33    2.96
   3   6  -4   46.59    2.74
  -3   6   4   47.33    2.62
   3  -6  -4   54.01    3.10
   3   6  -4   48.15    2.82
  -3  -6   4   42.90    2.67
   3  -6  -4   48.54    2.91
   3   6  -3  401.08   10.03
  -3   6   3  390.29    9.59
  -3   6   3  361.44   10.26
  -3  -6   3  368.92   10.16
  -3  -6   3  370.79    9.64
   3   6  -3  377.52    9.67
  -3   6   3  386.87   10.16
   3  -6  -3  410.60   10.25
  -3   6   2  275.00    7.84
   3   6  -2  267.04    7.33
  -3  -6   2  266.27    7.39
  -3   6   2  268.73    6.89
  -3   6   2  253.06    7.21
  -3   6   2  273.08    7.80
   3  -6  -2  250.39    7.65
  -3   6   1   21.80    1.86
   3   6  -1   19.28    1.63
   3  -6  -1   16.67    1.81
  -3   6   1   19.94    1.53
  -3  -6   1   17.97    1.66
  -3   6   1   21.59    1.84
  -3  -6   1   23.40    1.97
  -3   6   1   24.14    1.83
   3   6  -1   20.61    1.78
   3  -6  -1   21.12    1.91
  -3   6   0  286.09    7.79
   3  -6   0  275.22    8.14
   3   6   0  295.11    7.87
  -3  -6   0  298.40    8.17
  -3   6   0  288.45    7.66
  -3  -6   0  298.82    8.08
  -3   6   0  287.01    8.08
   3   6   0  292.33    7.97
   3  -6   0  287.13    8.03
  -3   6  -1  214.55    6.26
   3  -6   1  215.39    6.73
   3   6   1  225.97    6.63
  -3  -6  -1  219.67    6.63
  -3   6  -1  214.95    6.44
  -3   6  -1  208.18    6.23
   3   6   1  220.52    6.58
  -3   6  -1  207.34    6.64
  -3  -6  -1  223.86    6.81
   3  -6   1  216.37    6.72
   3  -6   2    5.22    1.12
  -3   6  -2    9.91    1.14
   3  -6   2   10.11    1.45
  -3  -6  -2    7.24    1.16
  -3   6  -2    8.67    1.29
   3   6   2    8.21    1.20
  -3   6  -2    8.64    1.17
   3   6   2    8.15    1.18
  -3  -6  -3  184.32    5.90
  -3   6  -3  181.07    5.35
   3   6   3  181.28    6.04
   3  -6   3  179.90    6.09
  -3   6  -3  185.99    6.33
  -3  -6  -3  182.13    6.44
  -3   6  -3  194.84    5.58
   3   6   3  174.57    5.76
   3  -6   3  162.78    6.19
   3   6   4  227.25    6.06
   3  -6   4  217.28    5.96
  -3  -6  -4  208.77    7.42
  -3  -6  -4  215.01    5.54
   3  -6   4  220.59    7.09
  -3  -6  -4  209.13    6.57
  -3   6  -4  216.88    6.09
  -3   6  -4  223.31    7.44
  -3   6  -4  211.05    5.78
   3   6   4  217.99    6.53
   3   6   4  224.43    7.08
   3  -6   5   18.67    1.93
  -3  -6  -5   17.71    1.26
  -3  -6  -5   15.50    2.05
   3   6   5   15.13    1.79
  -3   6  -5   20.99    2.25
  -3  -6  -5   15.54    1.72
  -3   6  -5   17.61    1.39
  -3   6  -5   15.87    1.54
  -3  -6  -5   15.17    1.54
   3   6   5   16.87    1.41
   3   6   6   24.66    1.89
   3   6   6   26.01    2.39
   3  -6   6   27.24    2.33
  -3  -6  -6   23.49    2.56
  -3   6  -6   25.35    1.64
  -3   6  -6   23.44    1.83
   3  -6   6   21.00    1.62
   3   6   6   24.40    1.75
   3   6   7   99.02    4.07
   3  -6   7   97.61    4.66
  -3  -6  -7   99.02    5.51
  -3   6  -7  102.69    5.28
   3   6   7   95.76    4.86
  -3   6  -7   97.76    3.91
   3  -6   7   94.69    3.74
   3   6   7   97.37    3.79
   3  -6   8   52.61    3.03
  -3  -6  -8   60.21    4.35
  -3  -6  -8   57.96    4.21
  -3   6  -8   56.72    3.91
   3   6   8   62.64    3.89
   3   6   8   64.60    3.01
  -3   6  -8   61.26    2.93
   3   6   8   56.33    2.65
   3   6   8   61.67    2.82
   3  -6   8   59.29    2.91
   3  -6   9  139.76    5.05
  -3  -6  -9  124.22    6.45
  -3  -6  -9  118.71    6.16
  -3   6  -9  139.96    6.20
  -3   6  -9  126.34    4.28
   3   6   9  128.37    5.76
   3   6   9  139.31    4.39
   3   6   9  140.37    4.42
   3   6   9  131.88    4.40
   3  -6   9  135.45    4.64
   3   6   9  134.61    4.51
   3  -6  10    4.00    1.04
   3   6  10    5.60    0.97
   3   6  10    5.18    0.91
   3   6  10    3.92    0.92
   3  -6  10    2.85    0.85
   3   6  10    3.31    0.81
   3  -6  11    1.16    0.71
   3   6  11    1.39    0.70
   3   6  11    0.79    0.55
   3   6  11   -0.22    0.67
   3  -6  11    0.19    0.55
   3   6  11    1.54    0.54
   3  -6  12    0.69    0.53
   3   6  12    0.80    0.48
   3   6  12   -0.39    0.49
   3  -6  13    0.31    0.27
  -3  -7  13    3.77    0.77
  -3   7  13   74.34    1.90
  -3  -7  12    0.05    0.53
  -3  -7  12   -0.16    0.53
  -3  -7  12    0.80    0.70
  -3   7  12   -1.15    0.96
  -3  -7  11    8.87    1.21
  -3   7  11    7.91    0.92
  -3  -7  11    9.38    1.06
  -3  -7  11    9.99    1.19
  -3   7  11    9.77    1.21
  -3   7  11    8.71    1.24
  -3  -7  11    7.76    1.07
  -3  -7  10   10.33    1.33
  -3   7  10   11.84    2.06
  -3   7  10   11.69    1.11
  -3  -7  10   13.22    1.26
  -3  -7  10   12.03    1.30
   3   7 -10   11.46    1.84
   3  -7 -10    6.66    1.55
  -3   7  10    9.39    1.34
  -3   7  10   10.39    1.32
  -3   7  10    9.88    1.54
  -3   7  10   11.14    1.44
  -3  -7  10   12.77    1.38
  -3  -7   9   10.73    1.36
   3  -7  -9    9.88    1.73
  -3   7   9   12.64    2.09
  -3  -7   9   11.89    1.25
  -3  -7   9   12.88    1.40
   3   7  -9   10.05    1.80
   3  -7  -9   11.32    1.77
  -3   7   9   11.51    1.41
  -3   7   9    9.39    1.33
  -3   7   9   12.60    1.63
  -3   7   9   12.22    1.51
  -3  -7   8   51.24    2.67
  -3   7   8   50.73    3.86
  -3  -7   8   57.77    2.49
  -3  -7   8   57.24    2.82
   3   7  -8   50.11    3.56
  -3   7   8   58.72    2.71
   3  -7  -8   46.19    3.45
  -3   7   8   51.86    2.75
  -3   7   8   44.09    2.58
  -3   7   8   47.00    2.90
  -3   7   8   48.80    2.66
   3  -7  -8   55.89    3.69
  -3  -7   7   68.60    3.02
  -3   7   7   72.39    4.50
  -3  -7   7   76.43    2.84
  -3  -7   7   68.94    3.09
   3   7  -7   77.14    4.28
  -3   7   7   68.96    3.07
   3  -7  -7   72.58    4.23
  -3   7   7   64.52    3.05
  -3   7   7   62.64    3.01
  -3   7   7   71.40    3.36
  -3   7   7   70.67    3.06
   3  -7  -7   75.33    4.22
  -3   7   6  152.05    6.56
  -3  -7   6  154.98    4.36
  -3  -7   6  158.59    4.88
   3   7  -6  159.66    6.16
  -3   7   6  145.51    4.78
   3  -7  -6  144.79    6.10
  -3   7   6  145.75    4.58
  -3   7   6  147.90    4.81
   3   7  -6  156.59    5.60
  -3   7   6  155.63    5.02
   3  -7  -6  152.05    6.13
  -3   7   5    7.40    1.50
  -3  -7   5    7.03    0.85
   3   7  -5    8.69    1.42
   3  -7  -5    6.12    1.28
  -3   7   5    7.27    0.97
   3  -7  -5    6.80    1.36
  -3   7   5    7.55    1.19
  -3  -7   5    7.44    1.20
  -3   7   5    6.34    1.02
  -3   7   5    7.06    1.03
  -3  -7   5    7.36    1.45
   3   7  -5    7.35    1.30
  -3  -7   4 1153.24   23.73
  -3  -7   4 1139.07   21.87
  -3  -7   4 1120.82   24.25
   3   7  -4 1149.41   23.71
  -3   7   4 1088.62   21.99
  -3  -7   4 1134.20   23.41
  -3   7   4 1146.38   23.12
   3   7  -4 1176.15   23.67
   3  -7  -4 1195.03   24.24
  -3   7   3   46.13    3.07
   3   7  -3   47.08    2.83
  -3  -7   3   49.62    2.93
   3   7  -3   43.06    2.72
  -3   7   3   45.69    2.97
  -3   7   3   44.46    2.62
  -3  -7   3   42.20    2.93
   3  -7  -3   49.96    3.06
  -3   7   2  123.00    5.08
   3   7  -2  120.74    4.67
   3  -7  -2  132.97    5.12
  -3  -7   2  126.24    4.82
  -3   7   2  128.76    4.42
  -3   7   2  121.79    4.97
  -3   7   2  128.14    4.65
   3  -7  -2  126.25    5.16
  -3   7   1  225.86    7.02
  -3  -7   1  215.61    7.06
   3   7  -1  232.77    6.90
   3  -7  -1  212.86    7.06
  -3   7   1  231.76    7.20
  -3   7   1  214.19    6.39
  -3  -7   1  228.76    7.00
  -3   7   1  235.85    6.72
   3   7  -1  231.10    7.04
   3  -7  -1  228.16    7.26
  -3  -7   0  160.29    5.62
  -3   7   0  148.78    5.27
   3   7   0  148.91    5.29
   3  -7   0  129.18    5.27
  -3   7   0  146.82    5.05
  -3  -7   0  154.45    5.46
   3   7   0  144.03    5.27
  -3   7   0  144.08    5.41
   3  -7   0  142.98    5.34
  -3   7  -1  113.50    4.42
  -3  -7  -1  113.18    4.64
   3  -7   1  118.21    4.79
   3   7   1  118.72    4.74
  -3   7  -1  107.44    4.38
   3   7   1  121.98    4.69
  -3   7  -1  115.24    4.31
  -3   7  -1  114.87    4.76
  -3  -7  -1  112.73    4.71
   3  -7   1  116.20    4.75
  -3   7  -2  576.17   13.44
   3  -7   2  593.62   14.01
   3   7   2  604.57   14.28
  -3   7  -2  584.40   13.99
  -3  -7  -2  587.24   13.99
   3   7   2  596.31   13.77
   3   7   2  591.85   13.84
  -3   7  -2  614.15   13.42
  -3  -7  -2  610.31   14.51
   3  -7   3  120.89    3.98
  -3   7  -3  122.73    4.50
  -3  -7  -3  121.00    3.74
   3  -7   3  128.67    5.04
  -3   7  -3  128.67    4.47
  -3   7  -3  123.74    5.12
   3   7   3  119.44    4.78
  -3   7  -3  125.64    4.05
   3   7   3  119.23    4.72
  -3  -7  -3  117.82    4.81
   3   7   3  127.41    3.94
  -3  -7  -3  127.81    5.40
  -3  -7  -4   42.80    3.17
  -3  -7  -4   41.86    1.98
   3  -7   4   40.22    2.78
  -3   7  -4   44.07    2.40
  -3   7  -4   45.15    3.08
   3  -7   4   39.49    2.19
  -3   7  -4   37.78    2.08
   3   7   4   42.65    2.60
   3   7   4   38.47    2.69
  -3  -7  -4   40.05    2.65
  -3  -7  -5   10.08    1.76
   3  -7   5    5.92    1.45
  -3  -7  -5    7.86    0.93
  -3  -7  -5    5.72    1.15
   3  -7   5    7.97    1.36
  -3   7  -5    7.87    1.54
   3   7   5    9.63    1.48
  -3   7  -5    7.14    0.95
  -3  -7  -5    9.55    1.50
   3   7   5    8.60    1.11
   3  -7   6   96.04    3.87
  -3  -7  -6  100.67    5.41
   3  -7   6   91.89    4.44
   3   7   6   89.78    4.59
  -3   7  -6   93.02    3.42
  -3   7  -6   95.56    3.90
   3   7   6   96.73    3.70
   3  -7   6   88.51    3.56
  -3   7  -7   -0.10    0.83
  -3  -7  -7    0.91    1.06
   3  -7   7   -0.15    0.65
  -3   7  -7    1.16    1.04
   3   7   7   -0.17    0.86
   3  -7   7    0.28    0.70
   3   7   7    0.92    0.68
  -3  -7  -8   17.32    2.45
  -3   7  -8   25.24    2.63
  -3   7  -8   19.43    1.71
   3   7   8   22.92    2.34
   3   7   8   22.93    1.61
   3   7   8   21.92    1.67
   3   7   8   22.06    1.78
   3  -7   8   21.31    1.76
  -3  -7  -9   30.86    3.24
   3  -7   9   39.42    2.55
   3   7   9   35.86    2.86
  -3  -7  -9   32.05    3.11
  -3   7  -9   36.26    3.05
  -3   7  -9   38.67    2.18
   3   7   9   44.74    2.26
   3   7   9   36.58    2.02
   3   7   9   38.62    2.21
   3  -7   9   37.60    2.29
   3  -7  10   69.54    3.23
   3   7  10   69.61    2.75
   3   7  10   58.98    2.52
   3   7  10   70.01    2.80
   3  -7  10   69.12    2.91
   3  -7  11   25.05    1.72
   3   7  11   25.72    1.36
   3   7  11   27.68    1.52
   3   7  11   23.15    1.33
   3   7  11   24.46    1.35
   3  -7  11   25.80    1.51
   3  -7  12   26.30    1.45
   3   7  12   27.15    1.27
  -3   8  13   78.60    2.30
  -3  -8  12    1.87    0.55
  -3  -8  12    1.70    0.57
  -3  -8  11   18.46    1.31
  -3  -8  11   19.20    1.47
  -3   8  11   17.93    1.48
  -3   8  11   18.79    1.55
  -3   8  10   20.00    2.45
  -3  -8  10   20.94    1.46
  -3  -8  10   22.87    1.79
   3  -8 -10   16.89    2.16
  -3   8  10   21.08    1.73
  -3   8  10   21.43    1.73
   3  -8  -9    2.26    1.09
  -3   8   9    1.95    1.21
  -3  -8   9    1.30    0.71
   3   8  -9    2.15    1.13
  -3  -8   9    2.04    0.87
   3  -8  -9    0.58    0.88
  -3   8   9    1.43    0.96
  -3   8   9    0.83    1.01
   3  -8  -8    0.19    0.87
  -3   8   8   -0.44    0.96
  -3  -8   8    0.54    0.61
   3   8  -8    0.97    1.08
  -3  -8   8    0.09    0.74
  -3   8   8    0.42    0.71
   3  -8  -8    0.19    0.85
  -3   8   8   -0.49    0.81
  -3   8   8    0.09    0.97
  -3   8   8    3.00    1.34
  -3   8   7   63.71    4.36
  -3  -8   7   67.30    2.66
  -3  -8   7   72.34    3.22
   3   8  -7   61.77    3.99
  -3   8   7   70.21    3.13
   3  -8  -7   70.18    4.26
  -3   8   7   68.14    3.36
  -3   8   7   69.58    3.19
   3  -8  -7   71.83    4.24
   3   8  -6  148.09    5.59
  -3   8   6  146.58    6.63
  -3  -8   6  158.88    4.30
  -3  -8   6  154.67    4.86
  -3   8   6  134.61    4.58
   3   8  -6  158.59    6.33
   3  -8  -6  147.28    6.24
  -3   8   6  146.17    4.67
  -3   8   6  143.57    4.84
  -3   8   6  148.53    5.14
   3  -8  -6  149.29    6.24
   3  -8  -5    0.16    0.79
  -3   8   5   -0.19    0.91
   3   8  -5    0.77    0.83
  -3  -8   5    0.37    0.63
  -3   8   5    0.08    0.59
  -3  -8   5    0.17    0.85
  -3   8   5   -0.37    0.91
   3   8  -5   -0.27    0.69
   3  -8  -4    0.31    0.87
  -3  -8   4   -0.48    0.86
   3   8  -4   -0.57    0.80
  -3  -8   4    0.21    0.59
  -3   8   4    0.16    0.64
  -3   8   4    0.47    0.77
  -3   8   4   -0.45    0.92
  -3   8   4    0.15    0.72
  -3  -8   4    1.01    0.89
   3   8  -4   -0.27    0.68
  -3   8   3  101.53    4.88
  -3  -8   3  118.45    4.90
  -3  -8   3  114.63    3.59
   3  -8  -3  110.80    4.87
  -3   8   3  109.84    3.67
   3   8  -3  112.57    4.74
  -3  -8   3  107.93    4.93
   3   8  -3  113.21    4.75
  -3   8   3  113.77    4.53
  -3   8   3  115.08    5.05
   3  -8  -3  111.51    4.99
  -3   8   2  394.01   10.81
   3   8  -2  395.98   10.45
  -3  -8   2  397.82   10.54
   3  -8  -2  400.15   10.72
  -3   8   2  399.57    9.89
  -3   8   2  385.99   10.02
  -3   8   2  392.22   10.79
   3  -8  -2  367.23   10.83
  -3   8   1   18.85    1.95
   3   8  -1   16.74    1.77
  -3   8   1   17.92    1.69
  -3  -8   1   21.46    2.02
   3  -8  -1   14.83    2.06
   3   8  -1   16.81    1.82
  -3   8   1   17.60    1.94
  -3   8   1   16.34    1.68
   3  -8  -1   18.13    2.06
  -3   8   0   12.51    1.57
  -3  -8   0   10.66    1.53
   3   8   0   10.77    1.48
   3   8   0   10.80    1.48
  -3   8   0    9.95    1.33
   3  -8   0   10.06    1.82
  -3  -8   0   12.75    1.65
  -3   8   0   10.83    1.60
   3  -8   0   10.67    1.63
  -3  -8  -1  167.88    4.61
  -3   8  -1  159.41    5.79
  -3  -8  -1  164.58    6.09
   3  -8   1  174.63    6.17
   3   8   1  169.85    6.12
  -3   8  -1  166.36    5.81
  -3   8  -1  160.28    4.83
   3   8   1  160.11    5.84
  -3  -8  -1  170.00    6.21
  -3   8  -1  154.99    5.99
   3  -8   1  144.69    5.82
  -3   8  -1  163.87    5.55
  -3  -8  -2  356.20    8.06
  -3   8  -2  336.59    9.42
   3  -8   2  349.70    9.70
   3   8   2  356.13    9.43
   3   8   2  354.18   10.10
  -3   8  -2  346.98    9.74
   3   8   2  337.89    9.56
  -3   8  -2  344.06    8.38
  -3   8  -2  356.00    9.15
  -3  -8  -2  354.85   10.22
   3   8   2  346.71    8.15
  -3   8  -2  333.59   10.00
  -3  -8  -2  323.12    9.61
   3  -8   3  363.89    8.93
  -3  -8  -3  389.59    8.67
  -3   8  -3  361.45    9.88
   3  -8   3  368.20   10.26
  -3   8  -3  394.93   10.78
  -3   8  -3  374.76    9.05
   3   8   3  373.64   10.19
  -3  -8  -3  386.76   11.14
   3   8   3  380.96   10.19
  -3  -8  -3  373.42   10.47
  -3   8  -3  382.69    9.66
   3   8   3  386.41    8.92
   3  -8   4   16.85    1.50
  -3  -8  -4   18.80    1.36
   3   8   4   17.49    1.88
   3  -8   4   14.00    1.72
  -3   8  -4   18.35    2.08
  -3   8  -4   18.40    1.50
   3   8   4   16.52    1.75
  -3  -8  -4   15.12    1.80
   3  -8   4   15.57    1.99
  -3  -8  -4   17.64    2.18
   3  -8   5    5.51    1.40
   3  -8   5    5.61    1.04
   3  -8   5    3.78    1.08
  -3   8  -5    7.04    1.54
   3   8   5    5.95    1.26
  -3  -8  -5    3.64    1.33
  -3   8  -5    4.28    0.87
  -3  -8  -5    5.33    0.82
  -3  -8  -5    2.03    0.84
   3   8   5    4.20    0.92
  -3   8  -6    3.08    0.95
   3  -8   6    3.86    1.08
   3   8   6    2.42    1.04
  -3   8  -6    2.16    0.72
   3   8   6    2.55    0.84
  -3  -8  -6    3.08    1.40
  -3   8  -7    0.64    0.72
  -3   8  -7    0.59    0.91
   3   8   7    0.68    0.83
  -3  -8  -7    0.93    1.11
   3   8   7    0.56    0.66
   3  -8   7   -0.29    0.73
  -3  -8  -8   25.85    2.94
  -3   8  -8   24.00    2.59
   3   8   8   26.98    2.52
  -3   8  -8   20.03    1.79
   3  -8   8   19.90    1.74
   3   8   8   27.89    1.95
   3  -8   9  100.73    4.13
  -3   8  -9   92.84    3.57
   3   8   9  104.11    3.59
   3   8   9  102.09    3.78
   3  -8   9  100.37    3.83
   3  -8  10    4.76    0.99
   3   8  10    3.01    0.84
   3   8  10    2.88    0.79
   3  -8  10    2.53    0.86
  -3   8 -10    2.97    0.67
   3  -8  10    3.73    0.88
   3   8  10    3.20    0.70
   3  -8  11    1.64    0.65
   3   8  11    1.50    0.66
   3   8  11    1.87    0.60
   3  -8  11    1.50    0.76
   3  -8  11    1.00    0.51
   3  -8  12    1.65    0.50
   3   8  12    1.89    0.49
   3  -8  12    2.69    0.61
  -3  -9  13    4.86    0.68
  -3   9  13   91.88    1.89
  -3  -9  12    8.71    0.99
  -3   9  12    5.70    0.91
  -3  -9  11    0.53    0.74
  -3  -9  11   -0.09    0.45
  -3  -9  11   -0.07    0.58
  -3   9  11   -0.57    0.81
  -3   9  11    0.89    0.82
  -3  -9  10   14.25    1.48
  -3  -9  10   12.65    1.11
  -3  -9  10   13.10    1.37
  -3   9  10   13.59    1.41
  -3   9  10   10.41    1.35
  -3  -9   9    8.35    1.28
   3  -9  -9   11.00    1.83
  -3   9   9    9.05    1.82
  -3  -9   9    9.87    1.02
  -3  -9   9   11.63    1.40
   3   9  -9   10.22    1.82
  -3   9   9    9.69    1.35
   3  -9  -9    8.80    1.68
  -3   9   9    9.00    1.29
  -3  -9   8   67.71    3.14
  -3   9   8   65.86    4.50
  -3  -9   8   65.05    2.58
  -3  -9   8   69.12    3.19
   3   9  -8   59.09    4.04
  -3   9   8   68.53    2.98
   3  -9  -8   66.48    4.28
  -3   9   8   64.63    3.25
  -3   9   8   79.74    3.90
   3  -9  -8   61.67    4.10
  -3  -9   7  314.02    8.13
  -3   9   7  323.89   10.93
  -3  -9   7  336.58    8.38
   3   9  -7  313.91   10.26
  -3   9   7  310.60    8.15
   3  -9  -7  310.57   10.25
  -3   9   7  313.59    7.95
  -3   9   7  292.19    7.99
  -3   9   7  311.11    8.31
  -3   9   7  312.84    8.86
   3  -9  -7  315.32   10.30
  -3  -9   6   88.26    3.42
  -3   9   6   86.67    5.04
  -3  -9   6   90.70    3.56
   3   9  -6   84.79    4.65
   3   9  -6   86.90    4.18
  -3   9   6   86.64    3.44
  -3   9   6   80.78    3.50
  -3   9   6   73.25    3.23
   3  -9  -6   89.26    4.77
  -3   9   5   77.40    4.67
   3   9  -5   81.00    4.08
   3   9  -5   78.40    4.32
  -3   9   5   73.45    3.21
  -3   9   5   69.99    2.92
  -3  -9   5   83.07    4.58
   3  -9  -5   79.06    4.43
   3  -9  -4    7.11    1.54
  -3  -9   4    8.79    1.08
   3   9  -4    8.91    1.50
   3  -9  -4    7.02    1.41
  -3  -9   4    9.12    1.66
  -3   9   4    6.77    1.04
  -3   9   4    8.19    1.15
  -3  -9   4    9.76    1.59
   3   9  -4   10.69    1.55
  -3  -9   3  438.93   11.66
  -3  -9   3  422.65    9.48
  -3  -9   3  443.82   12.08
   3   9  -3  459.45   11.78
   3  -9  -3  443.24   11.80
  -3   9   3  426.34    9.57
   3   9  -3  444.32   11.51
  -3   9   3  415.59    9.60
  -3   9   3  443.34   11.14
  -3   9   3  452.71   12.14
   3  -9  -3  439.28   12.14
  -3   9   2   80.35    4.23
   3   9  -2   67.33    3.80
  -3  -9   2   76.13    2.77
  -3  -9   2   76.33    4.01
   3  -9  -2   77.27    4.08
  -3   9   2   73.33    3.57
   3   9  -2   66.71    3.77
  -3   9   2   73.61    2.89
  -3   9   2   72.01    2.94
  -3  -9   2   77.90    4.24
  -3   9   2   77.06    3.73
  -3   9   2   76.85    4.17
   3  -9  -2   73.05    4.24
  -3   9   1   20.21    2.11
   3   9  -1   25.10    2.27
  -3   9   1   26.78    2.13
  -3  -9   1   22.68    2.18
   3  -9  -1   17.89    2.40
  -3   9   1   24.84    1.69
   3   9  -1   23.69    2.17
  -3   9   1   24.08    2.07
  -3   9   1   24.59    2.33
   3  -9  -1   25.25    2.47
  -3   9   0   14.14    1.77
   3   9   0   18.06    1.93
  -3  -9   0   13.61    1.81
   3  -9   0   22.63    2.68
   3   9   0   16.29    1.86
  -3   9   0   15.96    1.75
  -3   9   0   15.65    1.72
  -3  -9   0   16.30    1.91
  -3   9   0   17.42    1.46
  -3   9   0   14.47    1.82
   3  -9   0   15.82    1.99
   3   9   0   15.65    1.19
  -3  -9  -1    1.26    0.91
  -3  -9  -1    0.31    0.78
   3   9   1    0.47    0.85
  -3   9  -1    0.94    0.79
  -3   9  -1    0.59    0.60
   3   9   1    1.94    0.74
  -3   9  -1    0.12    0.71
  -3  -9  -1    1.27    0.62
  -3   9  -1    1.22    0.66
  -3   9  -1    0.43    0.73
  -3   9  -1    0.16    0.77
   3   9   1    0.43    0.78
   3   9   1    0.74    0.51
   3  -9   2   31.81    1.86
  -3   9  -2   33.78    2.54
   3   9   2   32.91    2.38
   3  -9   2   41.80    2.92
   3   9   2   35.69    2.84
  -3   9  -2   35.07    2.66
  -3   9  -2   32.27    1.85
  -3  -9  -2   34.83    1.89
  -3   9  -2   32.43    2.03
   3   9   2   34.19    2.60
  -3   9  -2   38.05    2.94
  -3   9  -2   36.22    2.43
  -3  -9  -2   35.13    2.88
   3   9   2   34.71    1.94
  -3  -9  -2   39.35    2.88
  -3  -9  -3   51.92    3.40
  -3  -9  -3   59.56    2.50
   3  -9   3   55.96    2.63
  -3   9  -3   53.80    3.20
   3  -9   3   55.50    3.31
  -3   9  -3   57.93    3.64
  -3   9  -3   54.11    2.66
   3   9   3   55.32    3.33
   3   9   3   55.30    3.19
  -3  -9  -3   58.79    3.83
   3  -9   3   52.99    3.65
   3   9   3   57.21    2.65
  -3  -9  -4  175.56    4.84
   3  -9   4  164.60    5.25
   3  -9   4  162.97    6.17
  -3  -9  -4  155.83    6.32
  -3   9  -4  164.33    6.62
  -3   9  -4  166.76    5.19
   3   9   4  159.75    5.98
   3   9   4  162.82    6.11
   3  -9   4  170.53    6.93
  -3  -9  -4  173.67    7.18
   3  -9   5   83.11    3.68
   3  -9   5   88.66    4.32
  -3   9  -5   83.65    4.73
  -3   9  -5   88.31    3.52
   3   9   5   88.84    4.38
  -3  -9  -5   87.06    4.47
   3  -9   5   91.42    5.05
  -3  -9  -5   91.00    5.19
   3   9   5   90.12    3.59
   3  -9   6    0.21    0.97
  -3   9  -6    0.22    0.80
   3  -9   6    0.44    0.60
  -3  -9  -6    1.60    1.17
  -3   9  -6    0.75    0.62
   3   9   6    0.16    0.77
   3   9   6    0.66    0.71
  -3   9  -7    0.66    0.85
  -3   9  -7   -0.59    1.03
   3   9   7    1.16    0.92
  -3  -9  -7    0.24    0.97
   3   9   7   -0.19    0.70
   3  -9   7    0.29    0.74
  -3   9  -8  105.63    5.31
  -3   9  -8  103.43    4.09
   3   9   8   98.01    4.82
   3   9   8  105.67    3.94
   3  -9   8   97.40    3.90
  -3  -9  -8  104.62    5.84
   3  -9   9   14.12    1.53
  -3   9  -9   13.40    1.31
   3   9   9   11.46    1.25
   3  -9   9   12.01    1.33
   3  -9  10    1.21    0.68
   3   9  10    1.16    0.72
   3   9  10    1.33    0.63
   3  -9  10    0.32    0.75
  -3   9 -10    1.00    0.51
   3  -9  10    1.74    0.69
   3  -9  11    1.85    0.60
   3   9  11    2.62    0.64
   3   9  11    2.36    0.55
   3  -9  11    2.80    0.70
   3  -9  11    1.47    0.51
   3  -9  12   23.49    1.16
   3   9  12   23.86    1.07
   3  -9  12   25.46    1.20
  -3 -10  13   10.87    0.82
  -3  10  13  116.25    1.89
  -3 -10  12    0.56    0.48
  -3  10  12   -0.41    0.76
  -3 -10  11    6.53    0.88
  -3 -10  11    5.84    0.95
  -3  10  11    4.74    1.01
  -3 -10  10   63.18    2.84
  -3  10  10   66.00    2.91
  -3 -10  10   63.77    2.83
  -3 -10   9   -0.09    0.73
   3 -10  -9   -0.19    0.82
  -3  10   9    0.84    1.00
   3  10  -9   -0.20    0.88
  -3 -10   9    0.18    0.69
   3 -10  -9    0.19    0.92
  -3  10   9   -0.09    0.91
  -3 -10   8    9.59    1.28
   3 -10  -8    8.70    1.72
  -3  10   8    5.19    1.55
   3  10  -8    4.67    1.39
  -3 -10   8    8.59    1.27
   3 -10  -8    5.42    1.45
  -3  10   8    8.00    1.34
  -3  10   8    8.27    1.37
  -3 -10   7   26.32    1.91
  -3  10   7   23.73    2.76
  -3  10   7   25.79    2.08
   3  10  -7   29.19    2.84
  -3  10   7   25.58    1.93
  -3  10   7   23.26    1.83
   3 -10  -7   26.90    2.73
  -3  10   7   29.52    1.93
  -3 -10   7   27.25    2.08
   3 -10  -7   29.70    2.89
  -3 -10   6    0.35    0.71
   3 -10  -6   -0.40    1.06
  -3  10   6    0.67    1.12
   3  10  -6   -0.19    0.85
  -3  10   6    0.09    0.63
  -3  10   6   -0.41    0.91
   3  10  -6    0.15    0.63
  -3  10   5   26.58    2.84
  -3 -10   5   30.72    2.01
  -3  10   5   25.57    1.75
  -3 -10   5   26.62    2.71
   3  10  -5   29.52    2.74
   3 -10  -5   28.68    2.72
  -3  10   5   29.51    2.01
   3  10  -5   31.01    2.55
  -3  10   5   29.48    2.07
   3 -10  -5   28.65    2.81
  -3 -10   4   25.52    2.52
  -3 -10   4   24.91    1.72
   3  10  -4   24.62    2.45
   3 -10  -4   26.75    2.56
  -3 -10   4   25.39    2.58
   3  10  -4   26.23    2.41
  -3  10   4   24.23    1.78
  -3  10   4   19.21    1.50
   3 -10  -4   25.53    2.71
  -3  10   3   19.78    1.57
  -3 -10   3   23.02    1.59
  -3 -10   3   20.68    2.22
  -3 -10   3   19.53    2.32
   3  10  -3   25.14    2.43
   3 -10  -3   20.34    2.24
  -3  10   3   18.55    1.48
  -3  10   3   18.86    1.50
   3  10  -3   20.81    2.16
  -3  10   3   22.82    2.47
   3 -10  -3   20.78    2.45
  -3  10   2  184.47    7.06
   3  10  -2  185.78    6.81
  -3 -10   2  194.67    6.95
   3 -10  -2  184.34    6.80
  -3  10   2  178.95    5.27
  -3 -10   2  184.29    7.08
   3  10  -2  178.05    6.62
  -3  10   2  174.06    4.96
  -3  10   2  186.47    7.00
   3 -10  -2  171.49    7.05
  -3 -10   2  187.29    4.94
  -3  10   1   82.02    4.46
  -3 -10   1   87.40    2.94
   3  10  -1   85.76    4.44
   3 -10  -1   73.58    4.47
  -3  10   1   88.03    4.62
  -3 -10   1   91.76    4.58
  -3  10   1   80.25    4.01
  -3  10   1   80.33    3.32
   3  10  -1   72.60    4.11
  -3  10   1   83.10    3.05
  -3  10   1   75.55    3.89
   3 -10  -1   82.31    4.62
  -3  10   0    2.14    0.97
  -3 -10   0    0.87    1.06
  -3  10   0    1.57    0.71
   3  10   0    0.84    0.90
  -3  10   0    0.42    0.74
  -3 -10   0    1.17    0.95
   3  10   0    1.34    0.69
  -3  10   0    1.45    0.88
  -3  10   0    1.19    0.95
   3  10   0    0.94    0.80
  -3  10  -1    0.16    0.77
   3 -10   1    1.29    0.59
  -3 -10  -1    1.04    1.00
  -3  10  -1    0.62    0.58
   3  10   1    0.70    0.87
  -3  10  -1    2.23    0.99
   3  10   1    1.42    0.79
  -3 -10  -1    1.73    0.97
  -3  10  -1    0.52    0.80
   3  10   1    1.72    0.94
   3  10   1    1.31    0.58
   3 -10   2    0.36    1.03
  -3  10  -2    1.26    0.98
   3 -10   2    0.23    0.58
   3  10   2   -0.18    0.77
  -3  10  -2    0.27    0.71
  -3  10  -2    0.32    0.77
  -3  10  -2    0.77    0.62
  -3 -10  -2    1.04    1.02
  -3  10  -2   -0.18    0.91
  -3 -10  -2    0.74    1.03
   3  10   2    0.16    0.83
   3  10   2    0.62    0.63
   3  10   2    2.12    0.73
   3 -10   3   87.88    3.51
  -3  10  -3   83.31    4.32
  -3 -10  -3   90.40    4.77
   3 -10   3   82.86    4.27
  -3  10  -3   92.98    4.73
  -3  10  -3   92.87    3.70
   3  10   3   89.48    4.47
   3  10   3   97.80    4.32
  -3  10  -3   87.12    4.87
  -3 -10  -3   87.52    4.92
   3 -10   3   93.45    4.97
   3  10   3   92.96    3.58
   3 -10   4    0.99    1.01
   3 -10   4    0.10    0.72
  -3 -10  -4    0.21    1.00
   3  10   4    0.14    0.77
   3 -10   4   -0.29    0.82
  -3  10  -4    0.36    0.94
  -3  10  -4    0.19    0.67
  -3 -10  -4    0.35    0.97
   3  10   4    0.15    0.70
   3 -10   5   28.36    2.07
   3 -10   5   26.78    2.33
  -3 -10  -5   29.26    2.62
   3  10   5   31.22    2.54
  -3  10  -5   28.29    1.96
   3 -10   5   32.79    3.03
  -3 -10  -5   28.09    3.00
   3  10   5   30.80    2.11
  -3  10  -6   18.26    2.27
   3  10   6   16.34    1.93
  -3  10  -6   17.22    1.48
  -3  10  -6   16.83    1.79
   3 -10   6   17.36    2.26
  -3 -10  -6   21.51    2.70
   3  10   6   15.57    1.56
   3 -10   7   54.50    2.89
  -3  10  -7   63.53    4.13
  -3  10  -7   65.65    3.36
   3  10   7   62.47    3.73
   3  10   7   69.64    2.88
  -3 -10  -7   75.57    4.91
   3  10   7   69.64    3.18
  -3  10  -8  430.40   10.54
   3  10   8  451.71    9.98
  -3 -10  -8  438.18   13.53
   3  10   8  440.59   10.39
   3 -10   8  412.34   10.28
   3 -10   9   12.18    1.44
  -3  10  -9   13.38    1.26
   3  10   9   11.88    1.24
   3 -10   9   12.92    1.31
   3 -10  10    1.65    0.70
   3 -10  10    2.85    0.87
   3  10  10    1.52    0.62
  -3  10 -10    1.34    0.55
   3 -10  10    1.18    0.63
   3 -10  11   10.77    0.98
   3  10  11   12.86    0.89
   3  10  11   11.66    0.90
   3 -10  11   12.93    1.07
   3 -10  12    0.70    0.28
   3  10  12    0.58    0.31
   3 -10  12    0.44    0.33
  -3 -11  12    9.32    0.84
  -3  11  12    7.84    0.86
  -3 -11  11    1.70    0.60
  -3  11  11    0.61    0.82
  -3 -11  10   10.62    1.21
  -3 -11  10    8.55    1.13
  -3  11  10    9.53    1.20
  -3 -11   9   15.86    1.45
  -3 -11   9   17.02    1.37
  -3 -11   9   16.34    1.56
  -3  11   9   15.56    1.48
  -3  11   9   20.73    1.73
   3 -11  -8    6.75    1.71
  -3  11   8    6.67    1.72
  -3 -11   8    5.61    1.00
  -3  11   8    5.09    1.21
  -3 -11   8    6.06    1.05
   3  11  -8    3.65    1.41
  -3 -11   8    6.59    1.17
   3 -11  -8    4.97    1.36
  -3  11   8    5.59    1.18
  -3  11   7   29.09    3.04
  -3  11   7   21.80    1.75
  -3 -11   7   23.36    1.91
   3  11  -7   27.03    2.79
  -3  11   7   25.54    1.88
  -3  11   7   28.68    1.95
  -3 -11   7   27.52    1.95
   3 -11  -7   28.38    2.93
  -3 -11   6  114.04    4.05
  -3  11   6  106.51    5.87
  -3  11   6  100.61    3.73
   3  11  -6  102.37    5.46
   3 -11  -6  104.68    5.46
  -3  11   6  110.62    4.14
   3  11  -6  112.45    4.93
   3 -11  -6  118.73    5.91
   3 -11  -5   13.54    2.13
  -3  11   5   11.65    1.99
  -3 -11   5   14.33    1.50
  -3 -11   5   17.18    2.25
   3  11  -5   14.24    2.07
   3 -11  -5   15.67    2.07
  -3  11   5   13.15    1.44
   3  11  -5   15.22    1.87
  -3  11   5   13.24    1.37
  -3  11   5   11.88    1.40
  -3  11   4   39.85    3.43
  -3 -11   4   44.44    3.38
  -3 -11   4   43.78    2.35
   3  11  -4   48.75    3.56
   3 -11  -4   45.94    3.42
  -3  11   4   41.62    2.22
   3  11  -4   44.90    3.19
  -3  11   4   38.85    2.04
  -3 -11   4   39.90    3.38
   3 -11  -4   43.72    3.61
  -3  11   4   39.94    2.35
   3 -11  -3    2.73    1.38
  -3  11   3    4.10    0.85
  -3  11   3    7.05    1.18
   3  11  -3    3.15    1.23
  -3 -11   3    5.49    0.96
   3 -11  -3    3.95    1.21
  -3  11   3    5.24    1.00
  -3 -11   3    4.18    1.31
  -3  11   3    4.33    1.30
   3  11  -3    4.72    1.29
  -3 -11   3    4.81    1.30
  -3  11   2   28.49    2.80
  -3 -11   2   29.74    1.75
  -3 -11   2   28.14    2.69
   3  11  -2   29.53    2.72
   3 -11  -2   20.71    2.68
  -3  11   2   23.46    1.80
  -3 -11   2   25.40    2.61
   3  11  -2   25.76    2.50
  -3  11   2   28.20    1.80
  -3  11   2   30.69    2.84
   3 -11  -2   24.90    2.89
  -3  11   1   57.62    3.89
  -3  11   1   59.53    2.54
  -3 -11   1   60.91    2.47
   3  11  -1   61.33    3.92
   3 -11  -1   53.17    4.34
  -3 -11   1   62.13    3.96
  -3  11   1   56.24    3.52
  -3  11   1   59.38    2.90
  -3  11   1   57.17    3.86
  -3  11   0   72.42    4.26
   3  11   0   65.85    4.09
  -3  11   0   58.97    3.70
   3  11   0   65.23    3.27
  -3 -11   0   65.97    4.11
  -3  11   0   65.83    3.09
   3  11   0   62.19    3.93
  -3  11   0   65.93    4.13
   3 -11   1   41.45    2.10
  -3  11  -1   46.23    3.36
   3 -11   1   43.12    4.01
  -3 -11  -1   43.74    3.42
   3  11   1   45.08    3.45
  -3  11  -1   37.76    2.97
  -3 -11  -1   44.43    3.36
  -3  11  -1   40.76    2.47
   3  11   1   45.46    3.26
   3  11   1   42.30    2.63
  -3  11  -1   50.02    3.57
   3 -11   1   36.26    3.18
   3 -11   2    9.78    1.12
  -3  11  -2    9.57    1.64
  -3  11  -2   11.94    1.95
   3 -11   2   14.33    1.91
   3 -11   2    9.38    1.76
   3  11   2    8.59    1.27
   3  11   2    6.37    1.49
  -3  11  -2   10.58    1.74
  -3  11  -2    8.43    1.12
  -3 -11  -2   11.86    1.88
  -3 -11  -2   12.15    1.98
   3  11   2   10.36    1.19
   3  11   2   10.73    1.72
   3 -11   3  233.39    6.72
  -3  11  -3  235.61    8.23
   3 -11   3  249.21    8.02
  -3  11  -3  257.60    8.73
  -3  11  -3  243.23    6.42
   3  11   3  250.21    8.32
  -3  11  -3  243.53    7.06
  -3 -11  -3  239.55    8.63
   3  11   3  230.21    7.52
  -3 -11  -3  247.62    9.10
  -3  11  -3  238.51    8.92
   3 -11   3  247.23    8.97
   3  11   3  257.92    6.88
   3 -11   4  169.75    5.44
   3 -11   4  162.92    6.18
  -3  11  -4  179.89    7.12
   3  11   4  169.83    6.42
  -3  11  -4  156.33    5.28
   3  11   4  159.98    6.04
  -3 -11  -4  164.75    6.88
  -3  11  -4  151.89    7.09
  -3 -11  -4  171.67    7.44
   3 -11   4  171.57    7.24
   3 -11   5    3.62    1.25
  -3 -11  -5    1.62    1.19
   3 -11   5    4.07    1.01
   3  11   5    2.83    0.99
  -3 -11  -5    4.60    1.45
  -3  11  -5    3.28    0.93
  -3  11  -5    3.37    1.37
   3  11   5    3.47    0.95
   3 -11   6    9.96    1.83
  -3 -11  -6   11.62    2.10
   3  11   6    6.99    1.33
  -3  11  -6    8.25    1.70
   3 -11   6    9.73    1.42
  -3  11  -6   11.94    1.25
   3  11   6    9.91    1.15
   3  11   6   11.11    1.37
  -3  11  -7   48.05    3.52
   3  11   7   46.60    3.10
  -3  11  -7   48.90    2.86
   3  11   7   50.27    2.40
   3  11   7   50.58    2.66
   3 -11   7   42.80    2.52
  -3  11  -8   83.75    3.59
   3  11   8   93.74    3.26
   3  11   8   87.35    3.45
   3 -11   8   85.23    3.45
   3  11   9   33.26    1.85
   3 -11   9   30.05    2.02
  -3  11  -9   32.81    1.87
   3  11   9   37.16    1.85
   3 -11   9   31.92    1.85
   3 -11  10    0.56    0.58
   3  11  10    0.35    0.53
   3 -11  10   -0.06    0.64
  -3  11 -10   -0.04    0.41
   3 -11  10    0.20    0.45
   3 -11  11   31.98    1.50
   3  11  11   30.87    1.27
   3 -11  11   31.17    1.46
  -3 -12  12    1.86    0.41
  -3  12  12    1.57    0.57
  -3 -12  11    1.39    0.53
  -3  12  11   -0.38    0.77
  -3 -12  10    0.95    0.59
  -3  12  10    0.50    0.72
  -3 -12   9  105.14    3.68
  -3 -12   9  106.16    3.52
  -3 -12   9  105.16    3.87
  -3  12   9  105.73    3.84
  -3 -12   8   79.85    3.25
  -3  12   8   74.03    4.70
  -3 -12   8   81.27    3.24
  -3 -12   8   77.04    3.38
  -3  12   8   76.19    3.40
  -3  12   8   75.03    3.06
   3 -12  -8   78.85    4.80
  -3 -12   7  196.44    5.69
  -3  12   7  190.64    8.17
  -3 -12   7  198.57    5.98
   3  12  -7  174.47    7.53
  -3  12   7  194.33    5.72
   3 -12  -7  189.71    7.63
  -3  12   7  194.41    5.74
  -3  12   7  176.32    5.32
   3 -12  -7  202.71    8.14
  -3 -12   6   -0.09    0.78
   3 -12  -6   -0.44    1.46
  -3  12   6   -0.23    0.99
   3  12  -6    0.21    0.89
  -3  12   6    0.78    0.69
   3 -12  -6    0.20    0.93
  -3  12   6    0.87    0.95
  -3  12   6    0.53    0.83
   3 -12  -5   -0.68    1.33
  -3  12   5   -0.23    1.05
  -3 -12   5    0.21    1.06
   3  12  -5    0.83    0.99
  -3 -12   5    0.09    0.76
   3 -12  -5    0.40    0.99
  -3  12   5   -0.10    0.75
  -3  12   5   -0.37    0.83
  -3  12   5    1.40    0.89
   3  12  -5   -0.33    0.86
   3 -12  -4    2.95    1.53
  -3  12   4    5.64    1.58
   3  12  -4    3.89    1.36
  -3 -12   4    4.37    0.98
   3 -12  -4    2.32    1.12
  -3 -12   4    5.33    1.57
  -3  12   4    3.48    0.83
  -3  12   4    2.91    0.95
   3  12  -4    3.47    1.12
   3 -12  -3    1.58    1.44
   3  12  -3    1.60    1.09
  -3 -12   3    1.63    0.74
   3 -12  -3    1.71    1.08
  -3  12   3    1.55    0.72
  -3 -12   3    2.76    1.25
  -3  12   3    0.63    0.95
  -3  12   3    3.89    0.97
   3  12  -3    1.60    1.01
  -3 -12   3    2.38    1.17
  -3  12   2  165.28    7.18
  -3 -12   2  164.57    4.86
  -3 -12   2  166.51    6.95
   3  12  -2  162.55    6.94
   3 -12  -2  154.41    7.04
  -3  12   2  156.07    5.25
   3  12  -2  165.89    6.77
  -3  12   2  158.53    4.87
  -3  12   2  154.20    6.88
  -3 -12   2  163.97    7.13
  -3  12   1    5.07    1.37
  -3 -12   1    4.44    1.40
  -3  12   1    2.98    0.94
  -3 -12   1    2.83    0.70
   3  12  -1    3.01    1.28
   3 -12  -1    7.93    3.12
  -3 -12   1    2.89    1.34
  -3  12   1    4.20    1.29
  -3  12   1    2.98    0.85
  -3  12   0   28.49    2.82
   3  12   0   28.51    2.83
  -3  12   0   29.01    2.86
  -3  12   0   29.91    2.70
  -3 -12   0   28.15    2.77
  -3  12   0   26.90    2.05
   3  12   0   31.48    2.81
   3 -12   0   31.45    3.11
   3 -12   1    8.93    1.86
  -3  12  -1   11.03    1.84
  -3 -12  -1    9.65    1.88
   3  12   1   13.76    2.04
  -3  12  -1   13.20    2.07
  -3  12  -1   10.84    1.72
   3 -12   1    8.56    2.90
  -3 -12  -1    8.86    1.69
  -3  12  -1   10.93    1.40
   3  12   1   11.04    1.77
   3 -12   2    2.44    1.39
  -3  12  -2    3.58    1.29
   3 -12   2    3.27    0.85
   3  12   2    4.07    1.43
  -3  12  -2    4.04    1.29
   3 -12   2    4.36    1.39
  -3  12  -2    2.50    1.14
  -3  12  -2    2.89    0.86
  -3 -12  -2    3.55    1.37
   3  12   2    4.62    1.35
  -3 -12  -2    4.07    1.53
   3 -12   3    6.68    1.67
  -3  12  -3    5.08    1.31
   3 -12   3    7.32    1.12
   3 -12   3    6.59    1.34
  -3  12  -3    6.08    1.50
  -3  12  -3    7.13    0.97
  -3  12  -3    6.47    1.66
  -3  12  -3    8.60    1.28
  -3 -12  -3    7.00    1.73
  -3 -12  -3    7.12    1.70
   3  12   3   11.54    1.78
   3 -12   4   21.09    1.79
  -3  12  -4   17.63    2.26
  -3 -12  -4   18.10    2.32
   3  12   4   21.34    2.24
  -3  12  -4   21.01    1.83
  -3 -12  -4   23.58    2.74
  -3  12  -4   21.42    2.57
   3 -12   4   21.82    2.55
  -3  12  -5   75.00    3.28
   3 -12   5   69.52    3.35
  -3 -12  -5   76.81    4.49
  -3 -12  -5   75.64    4.92
  -3  12  -5   72.51    4.77
   3  12   5   77.47    2.90
   3 -12   5   71.46    4.56
   3  12   5   73.78    3.34
  -3  12  -6    0.23    0.90
   3 -12   6   -0.31    0.75
  -3  12  -6    1.35    1.15
  -3  12  -6    0.58    0.90
  -3  12  -6   -0.08    0.60
   3  12   6    0.48    0.73
  -3 -12  -6   -0.94    1.09
  -3  12  -7    8.40    1.34
   3  12   7   11.45    1.18
   3 -12   7    8.05    1.22
  -3  12  -8    1.31    0.80
   3  12   8    2.55    0.77
   3 -12   8    1.27    0.73
   3 -12   9    0.48    0.69
   3  12   9    0.05    0.62
   3  12   9    0.89    0.70
   3  12   9    0.54    0.40
  -3  12  -9   -0.12    0.57
   3 -12   9    0.31    0.57
   3 -12  10    1.77    0.60
   3  12  10    2.42    0.58
   3  12  10    1.36    0.53
   3 -12  10    1.24    0.59
  -3  12 -10    1.12    0.38
   3 -12  10    1.08    0.45
   3 -12  11   -0.07    0.31
   3  12  11    0.20    0.35
   3  12  11   -0.07    0.31
   3 -12  11    0.34    0.38
  -3  13  12    5.65    0.57
  -3 -13  11    1.27    0.43
  -3  13  11    0.59    0.68
  -3 -13  10    1.20    0.56
  -3  13  10   -0.38    0.93
  -3 -13   9   12.99    1.19
  -3 -13   9   11.17    1.09
  -3  13   9   14.56    1.39
  -3 -13   8    0.37    0.68
  -3 -13   8    1.17    0.68
  -3 -13   8    1.20    0.77
  -3 -13   7   39.43    2.17
  -3  13   7   32.86    3.18
  -3 -13   7   37.69    2.34
   3  13  -7   33.67    3.14
  -3  13   7   34.76    2.09
   3 -13  -7   31.66    2.96
  -3  13   7   35.25    2.29
  -3  13   7   37.01    2.19
  -3  13   7   39.46    2.04
   3 -13  -7   30.46    3.21
  -3 -13   6   14.88    1.43
   3 -13  -6   10.91    2.24
  -3  13   6   15.30    2.34
   3  13  -6   16.19    2.33
  -3  13   6   12.29    1.39
   3 -13  -6   12.36    2.00
  -3  13   6   13.31    1.53
  -3 -13   5   25.41    1.82
  -3  13   5   20.91    2.71
  -3 -13   5   30.01    2.94
  -3 -13   5   26.55    2.00
   3  13  -5   26.87    2.82
   3 -13  -5   27.05    2.76
  -3  13   5   27.22    2.11
   3  13  -5   26.77    2.47
  -3  13   5   25.06    1.93
   3 -13  -5   23.95    2.98
  -3  13   4   38.39    3.50
  -3 -13   4   44.53    2.44
   3  13  -4   38.70    3.37
   3 -13  -4   41.20    3.33
  -3 -13   4   43.73    3.62
  -3  13   4   44.05    2.39
   3  13  -4   48.31    3.41
  -3  13   4   41.66    2.42
  -3  13   4   51.30    2.28
   3 -13  -4   40.17    3.80
  -3 -13   3   52.86    3.95
  -3 -13   3   48.02    3.69
  -3 -13   3   53.52    2.61
   3  13  -3   45.79    3.63
  -3  13   3   46.68    2.57
   3  13  -3   53.97    3.68
  -3  13   3   51.64    2.58
  -3  13   2   66.63    4.49
  -3 -13   2   67.17    2.86
  -3 -13   2   74.27    4.56
   3  13  -2   74.46    4.65
  -3 -13   2   60.73    4.33
  -3  13   2   64.83    3.16
   3  13  -2   69.73    4.24
  -3  13   2   72.06    2.95
  -3  13   2   68.11    4.47
  -3  13   1    2.33    1.22
  -3  13   1    1.94    1.18
  -3 -13   1    1.64    1.10
   3  13  -1    3.46    1.36
  -3  13   1    2.29    0.85
  -3 -13   1    2.62    1.37
  -3  13   0   41.90    3.50
   3  13   0   37.82    3.38
  -3 -13   0   42.31    3.47
  -3  13   0   39.38    3.17
   3  13   0   42.22    3.38
  -3  13   0   41.28    2.55
  -3  13   0   34.01    3.17
   3 -13   0   44.76    3.65
   3 -13   1   -0.42    1.31
  -3  13  -1    0.41    0.93
   3  13   1    1.11    1.09
  -3 -13  -1    0.42    0.98
  -3  13  -1    0.57    1.06
  -3  13  -1    0.86    0.91
  -3 -13  -1   -0.43    1.44
  -3  13  -1    3.01    1.31
   3  13   1    0.95    1.02
   3 -13   2    4.67    1.65
  -3  13  -2    7.58    1.65
   3 -13   2    7.56    1.08
  -3  13  -2    6.41    1.52
   3 -13   2    6.85    1.49
  -3 -13  -2    8.04    1.81
  -3  13  -2    7.58    1.06
  -3 -13  -2    6.89    1.74
  -3  13  -2    8.08    1.79
   3  13   2    5.92    1.39
   3 -13   3   12.22    1.98
   3 -13   3   14.99    1.45
  -3  13  -3   11.96    1.93
  -3  13  -3   16.85    2.24
  -3  13  -3   16.94    1.41
   3  13   3   16.53    2.07
  -3 -13  -3   16.15    2.32
  -3  13  -3   15.21    1.65
  -3 -13  -3   19.68    2.45
  -3  13  -3   12.25    2.10
   3 -13   4   66.12    3.18
  -3  13  -4   63.08    4.20
  -3 -13  -4   74.54    4.59
  -3  13  -4   68.79    3.29
  -3 -13  -4   63.77    4.50
  -3  13  -4   66.71    4.53
   3  13   4   74.17    2.66
   3 -13   4   71.56    4.55
   3 -13   5   14.05    2.09
   3 -13   5   14.97    1.52
  -3 -13  -5   17.35    2.40
  -3  13  -5   14.74    1.48
  -3 -13  -5   13.09    2.10
  -3  13  -5   13.86    2.16
   3  13   5   16.13    1.26
   3 -13   6    1.47    0.87
  -3 -13  -6    0.90    1.12
  -3  13  -6    0.38    0.83
  -3  13  -6    0.95    0.64
  -3  13  -6    0.65    0.92
   3  13   6    1.45    0.73
   3  13   7   20.46    1.39
  -3  13  -7   18.88    1.73
   3  13   8   22.89    1.40
  -3  13  -8   20.29    1.61
   3  13   8   19.39    1.47
   3  13   8   23.76    1.43
   3 -13   8   20.56    1.49
   3  13   9    7.91    0.82
   3  13   9    5.84    0.83
  -3  13  -9    6.03    0.78
   3 -13   9    5.63    0.76
   3 -13  10    1.52    0.49
   3  13  10    0.72    0.42
   3  13  10    0.72    0.47
   3 -13  10    0.76    0.50
  -3  14  11    7.06    0.87
  -3  14  11  123.55    1.91
  -3 -14  10    7.43    0.74
  -3  14  10    7.03    1.00
  -3 -14   9    6.66    0.83
  -3 -14   9    8.06    0.89
  -3 -14   8    4.12    0.81
  -3 -14   8    5.23    0.92
  -3 -14   7    2.51    0.76
  -3  14   7    2.36    0.75
  -3  14   7    2.07    0.76
  -3  14   7    2.47    0.93
  -3 -14   6    1.07    0.74
   3 -14  -6   -2.05    2.17
  -3  14   6   -0.22    0.98
  -3 -14   6    0.63    0.80
   3  14  -6    0.62    0.94
   3 -14  -6    0.19    0.95
  -3  14   6    0.75    0.69
  -3  14   6    0.09    0.84
   3 -14  -5    4.02    2.08
  -3  14   5    1.16    1.11
  -3 -14   5    1.18    0.90
   3  14  -5    1.07    1.05
   3 -14  -5    4.18    1.44
  -3  14   5    0.31    0.77
  -3 -14   5    1.50    0.70
  -3 -14   5    1.67    1.05
  -3  14   5    0.70    0.76
   3 -14  -4   13.30    2.86
  -3  14   4    4.68    1.50
   3  14  -4   11.77    2.01
   3 -14  -4    7.41    2.39
  -3  14   4    7.47    1.11
  -3 -14   4    7.00    1.71
  -3  14   4    9.01    1.23
   3  14  -4    7.84    1.55
  -3 -14   3   36.28    3.32
  -3 -14   3   37.97    3.31
   3  14  -3   34.28    3.21
   3 -14  -3   35.66    4.37
   3  14  -3   32.38    2.89
  -3  14   3   32.91    2.20
  -3  14   3   32.03    2.03
  -3  14   2   49.68    3.93
  -3 -14   2   51.01    3.84
   3  14  -2   49.03    3.87
   3  14  -2   50.31    3.65
  -3  14   2   51.76    2.87
  -3 -14   2   53.00    4.04
  -3  14   2   49.02    2.41
  -3  14   2   49.03    3.84
   3  14  -2   53.59    2.34
  -3  14   1   -0.22    1.10
  -3 -14   1    1.92    1.17
  -3  14   1    1.71    0.91
   3  14  -1    1.13    1.05
  -3 -14   1    0.23    1.26
  -3  14   1    1.76    1.22
   3 -14   0    1.72    1.56
  -3  14   0    1.10    1.10
  -3  14   0    0.76    0.85
  -3 -14   0    1.28    1.10
   3  14   0   -0.23    0.94
   3 -14   0   -1.89    3.30
  -3  14   0    0.22    1.04
   3  14   0    0.59    0.96
  -3  14  -1   45.63    3.62
   3 -14   1   52.45    3.47
   3  14   1   49.63    3.94
  -3 -14  -1   44.89    3.65
  -3  14  -1   45.10    3.50
  -3  14  -1   51.73    2.74
   3  14   1   40.76    3.30
  -3  14  -1   43.54    2.73
  -3 -14  -1   50.30    3.93
  -3  14  -1   36.65    3.37
   3 -14   1   38.76    3.53
   3 -14   2    3.68    1.57
  -3  14  -2    4.30    1.36
   3 -14   2    4.54    0.89
  -3 -14  -2    4.19    1.47
  -3  14  -2    5.03    1.43
  -3  14  -2    4.70    0.94
  -3 -14  -2    3.77    1.48
   3  14   2    4.14    1.29
   3 -14   3    3.00    1.24
  -3  14  -3    4.62    1.32
   3 -14   3    5.73    1.01
  -3  14  -3    4.85    1.44
  -3 -14  -3    5.38    1.51
  -3  14  -3    3.89    0.87
  -3  14  -3    4.88    1.10
  -3 -14  -3    5.17    1.62
   3 -14   4   57.66    2.86
  -3  14  -4   61.94    4.09
  -3 -14  -4   67.48    4.39
  -3 -14  -4   57.82    4.21
  -3  14  -4   60.13    3.01
   3 -14   4   57.38    4.04
   3 -14   5    1.00    0.98
   3 -14   5    0.19    0.66
  -3 -14  -5   -0.22    0.93
  -3  14  -5    0.27    0.63
   3  14   5    0.65    0.65
  -3  14  -6    0.43    0.60
   3  14   6    0.38    0.61
  -3  14  -7   76.82    3.29
   3  14   7   79.90    2.96
   3  14   7   76.36    2.58
  -3  14  -8   60.93    2.60
   3  14   8   62.51    2.16
   3  14   8   67.23    2.35
   3 -14   8   57.41    2.37
   3  14   9   11.34    0.95
   3  14   9   12.54    0.83
  -3  14  -9   10.86    0.89
   3 -14   9   12.92    1.05
   3 -14   9   10.44    0.79
   3 -14  10    0.85    0.36
   3  14  10    0.83    0.28
   3  14  10    0.85    0.36
   3 -14  10    0.86    0.39
  -3  15  11    7.09    0.59
  -3  15  10   -1.00    0.69
  -3 -15   9   20.14    1.17
  -3 -15   9   20.75    1.27
  -3 -15   8   19.17    1.44
  -3 -15   8   18.99    1.29
  -3 -15   7   77.13    2.90
  -3 -15   7   77.65    3.19
  -3  15   7   74.19    3.05
  -3  15   7   74.85    3.17
  -3  15   6   34.57    2.19
  -3  15   6   35.23    2.17
  -3 -15   6   32.27    1.91
  -3 -15   5   33.83    1.90
  -3  15   5   32.56    3.14
  -3  15   5   30.97    2.16
  -3  15   5   32.27    2.05
  -3  15   4   10.29    1.91
   3  15  -4    9.99    1.88
  -3  15   4   10.04    1.22
   3 -15  -4    7.75    3.69
  -3  15   4    9.00    1.31
  -3  15   4    9.84    1.20
  -3 -15   4   11.39    1.96
   3  15  -4    8.37    1.54
  -3 -15   3   69.77    4.50
  -3 -15   3   63.04    4.39
   3  15  -3   70.01    4.61
   3 -15  -3   73.84    5.90
   3  15  -3   64.97    4.07
  -3  15   3   69.38    3.19
  -3  15   3   66.98    2.85
  -3  15   2   28.42    3.04
  -3 -15   2   28.13    2.89
   3  15  -2   24.79    2.84
   3  15  -2   27.45    2.71
  -3  15   2   23.41    1.96
  -3 -15   2   22.57    2.68
   3  15  -2   27.83    1.62
  -3  15   1   48.13    3.86
  -3 -15   1   45.35    3.65
   3  15  -1   47.19    3.87
  -3 -15   1   39.14    3.52
   3  15  -1   47.71    3.55
  -3  15   1   46.04    2.69
   3  15  -1   48.24    2.33
   3 -15  -1   52.07    4.01
  -3  15   0  111.49    5.94
  -3 -15   0  109.96    5.80
   3  15   0  109.25    5.97
  -3  15   0  118.88    4.45
   3  15   0  109.88    5.54
  -3  15   0  115.84    4.50
  -3 -15   0  105.41    5.87
   3 -15   0  115.46    6.00
   3 -15   1   -1.08    1.62
  -3  15  -1    1.71    1.19
  -3 -15  -1    0.65    0.95
   3  15   1    1.16    1.19
  -3  15  -1    1.35    0.89
  -3  15  -1    0.65    0.77
  -3 -15  -1    0.23    1.28
   3  15   1    2.50    1.15
   3 -15   2   -0.21    1.67
  -3  15  -2    2.03    1.09
   3 -15   2    1.72    0.64
  -3 -15  -2    1.31    1.07
  -3  15  -2    1.39    0.75
  -3 -15  -2    0.22    1.43
   3 -15   3    1.87    1.16
   3 -15   3    2.42    0.80
  -3 -15  -3    0.87    1.06
  -3  15  -3    0.20    0.89
  -3  15  -3    2.18    0.67
  -3  15  -3    2.04    0.92
  -3 -15  -3    2.34    1.32
   3 -15   4  167.74    5.13
  -3  15  -4  169.04    5.40
   3 -15   5   42.31    2.27
  -3  15  -5   39.26    2.19
  -3  15  -6   -0.06    0.55
   3  15   6   -0.08    0.53
   3  15   6    0.32    0.65
   3  15   6    0.35    0.60
  -3  15  -7    5.28    0.96
   3  15   7    7.48    0.94
   3  15   7    7.12    0.72
   3  15   7    7.11    0.87
   3 -15   7    4.36    0.80
  -3  15  -8    1.11    0.55
   3 -15   8    1.27    0.60
   3  15   8    1.56    0.46
   3  15   8    1.64    0.59
   3  15   8    1.06    0.45
   3 -15   8    1.09    0.49
   3 -15   9   -0.04    0.40
  -3  15  -9    0.30    0.32
  -3 -16   9    7.21    0.64
  -3  16   9    6.10    0.84
  -3 -16   8    2.56    0.50
  -3 -16   8    2.93    0.63
  -3  16   8    1.22    0.80
  -3 -16   7    2.29    0.57
  -3 -16   7    1.76    0.67
  -3  16   7    2.19    0.66
  -3  16   7    0.64    0.88
  -3 -16   6    3.24    0.68
  -3  16   6    2.46    0.69
  -3  16   6    2.71    0.81
  -3  16   6    1.44    0.79
  -3 -16   5    9.92    1.00
  -3  16   5    9.12    1.22
  -3  16   5    8.55    1.10
  -3 -16   4    2.65    0.69
  -3  16   4    3.05    0.82
  -3  16   4    2.93    0.95
  -3  16   4    2.81    0.87
  -3  16   3    4.49    1.08
  -3  16   3    2.68    0.83
  -3 -16   3    3.13    1.29
  -3  16   3    2.61    0.74
   3 -16  -2   11.93    2.28
  -3  16   2   10.24    1.89
   3  16  -2    7.54    1.72
  -3  16   2    7.93    1.17
  -3 -16   2    7.77    1.68
   3  16  -2   10.06    0.99
   3  16  -2    7.42    1.58
  -3 -16   2    7.51    1.65
  -3 -16   1    1.05    0.95
   3 -16  -1    0.21    1.46
  -3  16   1    1.10    1.08
   3  16  -1    1.58    1.18
  -3  16   1    1.63    0.96
  -3  16   1    1.92    0.96
  -3 -16   1    0.66    1.16
  -3  16   1    0.43    0.97
   3  16  -1   -0.37    0.89
   3  16  -1    1.12    0.62
   3 -16   0   12.39    2.20
  -3 -16   0   15.64    2.20
  -3  16   0   15.07    2.23
   3  16   0   16.08    2.32
  -3  16   0   20.76    1.78
  -3  16   0   17.87    1.74
  -3  16   0   16.96    2.37
  -3 -16   0   13.17    2.20
   3  16   0   19.71    1.53
  -3  16  -1   92.27    5.13
  -3 -16  -1   82.52    4.90
  -3  16  -1   88.26    3.57
  -3  16  -1   82.90    3.70
  -3  16  -1   80.92    4.91
   3 -16   1   85.79    5.05
   3  16   1   88.53    3.40
   3 -16   2   63.71    2.56
  -3  16  -2   67.79    2.90
   3  16   2   69.65    3.01
   3 -16   3   10.63    1.11
  -3  16  -3   12.60    1.14
  -3  16  -3   10.88    1.40
   3  16   3   11.84    1.09
  -3  16  -4    5.26    1.03
   3  16   4    6.80    0.93
   3  16   4    5.52    0.97
  -3  16  -5    1.70    0.87
  -3  16  -5    1.69    0.66
   3  16   5    2.04    0.69
   3  16   5    1.91    0.71
  -3  16  -6    0.31    0.65
  -3  16  -6    1.30    0.51
   3  16   6    1.61    0.64
   3  16   6    1.70    0.57
  -3  16  -7    3.94    0.79
   3  16   7    4.82    0.70
   3  16   7    3.70    0.61
   3 -16   7    3.22    0.61
   3 -16   8   44.73    1.83
  -3  16  -8   43.16    1.74
   3  16   8   43.72    1.54
  -3  17   9    2.51    0.57
  -3 -17   8    2.90    0.53
  -3  17   8    1.90    0.66
  -3 -17   7    0.06    0.48
  -3  17   7    0.38    0.43
  -3  17   7   -0.59    0.73
  -3 -17   6   32.68    1.86
  -3  17   6   30.08    1.74
  -3  17   6   30.37    1.65
  -3 -17   5   40.45    1.72
  -3  17   5   41.53    2.24
  -3  17   5   39.08    1.88
  -3 -17   4   60.73    2.27
  -3  17   4   58.29    2.89
  -3  17   4   63.25    2.61
  -3  17   4   60.88    2.35
  -3 -17   3    6.71    0.83
  -3  17   3    9.40    1.26
  -3  17   3    7.85    1.11
  -3  17   2    4.58    0.97
  -3  17   1    8.04    1.20
  -3  17   1    8.53    1.24
   3  17  -1    9.66    1.02
  -3  17   0    2.55    0.95
  -3  17   0    3.35    0.94
   3  17   0    2.44    0.71
  -3  17  -1   59.31    2.73
  -3  17  -1   61.27    2.95
   3  17   1   56.83    2.58
  -3  17  -2   22.27    1.52
   3  17   2   23.95    1.67
  -3  17  -3   27.90    1.88
   3  17   3   26.73    1.74
  -3  17  -4   13.54    1.27
  -3  17  -4   12.79    1.35
   3  17   4   10.90    0.95
  -3  17  -5    0.45    0.66
  -3  17  -5    0.52    0.54
   3  17   5    0.47    0.50
   3  17   5    1.39    0.59
  -3  17  -6    4.87    0.88
  -3  17  -6    4.77    0.57
   3  17   6    5.21    0.66
   3  17   6    5.83    0.77
   3 -17   6    2.72    0.63
   3  17   7    0.58    0.39
   3  17   7    0.62    0.38
   3 -17   7   -0.14    0.32
   3 -17   8   18.33    0.89
  -3  17  -8   15.62    0.80
  -3 -18   8    8.90    0.63
  -3  18   8    8.41    0.61
  -3 -18   7    1.95    0.51
  -3  18   7    1.67    0.41
  -3  18   7    2.37    0.55
  -3 -18   6    5.80    0.81
  -3  18   6    4.12    0.71
  -3  18   6    4.88    0.67
  -3  18   5   -0.05    0.46
  -3  18   5    0.26    0.55
  -3  18   5    0.22    0.50
  -3  18   4   -0.22    0.63
  -3  18   4    0.61    0.52
  -3  18   3    1.11    0.72
  -3  18   3    1.16    0.63
  -3  18   2   24.89    1.71
  -3  18   1   15.18    1.42
  -3  18   1   14.47    1.40
   3  18  -1   13.15    1.05
  -3  18   0    7.40    1.08
  -3  18   0    7.59    1.10
   3  18   0    9.52    0.98
  -3  18  -1    1.09    0.67
  -3  18  -1    1.42    0.65
  -3  18  -1    0.65    0.72
   3  18   1    1.64    0.63
  -3  18  -2    0.57    0.58
  -3  18  -2    0.66    0.49
   3  18   2    0.38    0.55
  -3  18  -3    7.36    1.01
  -3  18  -3    6.22    0.93
   3  18   3    7.97    0.94
  -3  18  -4    0.60    0.57
  -3  18  -4    1.87    0.59
  -3  18  -5    4.05    0.77
  -3  18  -5    4.01    0.58
   3  18   5    3.59    0.48
   3  18   5    4.18    0.65
   3  18   6    6.98    0.52
   3  18   6    8.46    0.73
   3 -18   7   28.30    1.13
   3  18   7   32.22    1.11
  -3 -19   7    8.06    0.60
  -3 -19   6   10.91    0.84
  -3  19   6   11.65    0.82
  -3 -19   5   21.09    1.30
  -3  19   5   19.21    1.21
  -3  19   4   12.61    1.10
  -3  19   3    3.66    0.73
  -3  19   3    3.42    0.67
  -3  19   2    6.25    0.88
  -3  19   1    0.46    0.56
  -3  19   1    0.27    0.56
   3  19  -1    0.04    0.34
  -3  19   0    2.29    0.68
  -3  19   0    2.45    0.74
   3  19   0    2.13    0.54
  -3  19  -1    6.99    0.82
  -3  19  -1    6.75    0.80
  -3  19  -1    6.20    0.93
   3  19   1    6.36    0.76
  -3  19  -2    5.41    0.75
  -3  19  -2    4.66    0.59
   3  19   2    5.72    0.76
  -3  19  -3   10.98    1.00
  -3  19  -3   12.23    1.04
   3  19   3   12.32    1.00
  -3  19  -4    3.42    0.62
  -3  19  -4    3.04    0.57
  -3  19  -5   18.02    1.08
   3  19   5   18.43    1.02
   3  19   6   -0.02    0.22
  -3  19  -6    0.28    0.27
  -3 -20   6   13.61    0.71
  -3 -20   5    1.74    0.42
  -3  20   5    1.69    0.42
  -3  20   4    0.21    0.43
  -3 -20   3   11.00    0.89
  -3  20   3   10.74    0.93
  -3  20   3    9.40    0.75
  -3  20   2    5.58    0.74
  -3  20   2    4.26    0.63
  -3  20   1    3.58    0.63
  -3  20   1    4.36    0.70
  -3  20   0    6.62    0.72
  -3  20   0    6.68    0.80
   3  20   0    7.50    0.61
  -3  20  -1   12.48    0.83
  -3  20  -1   13.46    1.05
   3  20   1   13.02    0.86
  -3  20  -2    0.55    0.47
   3  20   2    0.40    0.35
  -3  20  -3    0.70    0.35
  -3  20  -3    0.52    0.36
   3  20   3    0.41    0.33
  -3  20  -4    3.96    0.47
   3  20   4    4.81    0.49
  -3  21   4    1.33    0.29
  -3 -21   3    2.86    0.39
  -3 -21   2    3.56    0.43
  -3  21   2    3.14    0.46
  -3  21   2    3.61    0.44
  -3 -21   1   17.38    0.80
  -3  21   1   19.41    0.96
  -3  21   1   19.72    1.01
  -3  21   0   25.45    0.99
  -3  21   0   28.77    1.26
  -3  21  -1    9.77    0.74
  -3  21  -2    1.88    0.38
  -4   0  14    1.01    0.41
  -4   0  13   21.91    1.25
  -4   0  13   22.25    1.39
  -4   0  12    2.38    0.71
  -4   0  12    1.65    0.77
  -4   0  11    0.30    0.62
  -4   0  11    0.97    0.77
  -4   0  11    0.90    0.71
  -4   0  10   11.46    1.35
  -4   0  10   10.88    1.31
  -4   0  10    9.38    1.20
  -4   0   9    5.65    0.97
  -4   0   9    6.14    1.14
  -4   0   8  120.44    4.19
  -4   0   8  120.96    6.07
  -4   0   8  133.99    4.61
  -4   0   8  125.58    4.62
   4   0  -8  124.02    5.37
   4   0  -7    3.21    1.09
  -4   0   7    1.82    0.64
  -4   0   7    1.41    0.71
  -4   0   7    1.50    0.77
  -4   0   6   30.77    2.70
  -4   0   6   28.42    1.81
  -4   0   6   28.60    1.89
  -4   0   6   30.68    2.05
  -4   0   6   31.79    2.03
   4   0  -6   26.91    2.42
  -4   0   5   13.06    1.73
  -4   0   5   11.39    1.15
  -4   0   5    9.97    1.16
   4   0  -5   11.48    1.23
  -4   0   5   10.17    1.34
  -4   0   5   12.62    1.43
   4   0  -5   12.82    1.72
  -4   0   4  239.29    7.41
  -4   0   4  230.40    5.94
   4   0  -4  233.57    6.47
  -4   0   4  237.42    6.14
  -4   0   4  227.55    6.95
  -4   0   3    8.27    1.23
   4   0  -3   10.05    1.15
  -4   0   3    9.32    1.35
  -4   0   2    0.47    0.62
  -4   0   2    0.11    0.72
   4   0  -2    0.60    0.51
  -4   0   1 3636.28   66.53
   4   0  -1 3701.81   67.00
  -4   0   1 3675.30   67.85
   4   0  -1 3495.64   67.82
  -4   0   0 5226.45   93.73
   4   0   0 5340.38   95.15
  -4   0   0 5105.49   94.55
   4   0   0 5234.55   95.72
   4   0   1 3892.79   71.05
  -4   0  -1 3774.78   70.86
  -4   0  -1 3863.54   71.56
   4   0   1 3831.26   71.21
   4   0   2   31.60    2.26
  -4   0  -2   31.68    2.31
  -4   0  -2   37.25    2.50
   4   0   2   35.35    2.24
   4   0   3  125.29    4.92
  -4   0  -3  123.80    5.08
  -4   0  -3  112.45    3.93
   4   0   3  126.00    4.79
  -4   0  -3  124.16    3.95
  -4   0  -3  132.30    4.92
   4   0   3  122.56    4.32
   4   0   4   69.33    2.89
  -4   0  -4   69.24    3.91
  -4   0  -4   65.43    2.87
  -4   0  -4   65.45    2.75
  -4   0  -4   67.90    3.36
   4   0   4   67.44    3.47
   4   0   5  168.34    5.19
  -4   0  -5  160.71    6.66
  -4   0  -5  155.01    4.98
  -4   0  -5  168.31    4.89
  -4   0  -5  163.08    5.43
   4   0   5  165.24    5.98
   4   0   6   20.41    1.75
   4   0   6   18.23    1.47
   4   0   6   18.41    1.93
  -4   0  -6   19.15    1.61
  -4   0  -6   17.18    2.27
  -4   0  -6   17.41    1.39
   4   0   7   10.42    1.36
  -4   0  -7   10.51    1.23
  -4   0  -7   10.66    1.93
  -4   0  -7    8.25    0.97
   4   0   7    9.41    1.48
   4   0   7    8.18    1.14
  -4   0  -8   67.84    2.86
   4   0   8   67.45    3.73
   4   0   8   67.79    3.03
  -4   0  -9   15.46    2.22
   4   0   9   16.58    1.52
   4   0  10   67.69    3.08
   4   0  10   59.90    2.24
   4   0  10   63.59    2.69
   4   0  10   59.11    2.62
   4   0  11   20.44    1.53
   4   0  11   20.24    1.32
   4   0  11   21.83    1.33
   4   0  12   47.77    1.59
  -4   1  14    2.52    0.50
  -4  -1  14    2.81    0.52
  -4  -1  13   20.40    1.23
  -4   1  13   19.35    1.25
  -4  -1  13   18.51    1.30
  -4   1  12   10.57    1.02
  -4  -1  12   10.94    1.12
  -4   1  12   12.33    1.22
  -4  -1  12   10.05    1.12
  -4  -1  12   11.99    1.04
  -4   1  11   32.13    1.90
  -4  -1  11   33.67    2.05
  -4   1  11   34.66    2.11
  -4  -1  11   34.54    2.11
  -4  -1  11   30.67    1.97
  -4   1  11   34.79    2.03
  -4   1  10    0.23    0.61
  -4  -1  10    0.50    0.72
  -4   1  10   -0.17    0.72
  -4  -1  10    0.09    0.72
  -4  -1  10    0.44    0.67
  -4   1  10    0.78    0.74
  -4   1   9    4.76    0.91
  -4  -1   9    4.59    0.91
  -4   1   9    4.36    1.06
  -4  -1   9    3.60    0.92
  -4  -1   9    3.83    1.00
  -4   1   9    4.19    0.98
  -4  -1   8   32.80    1.98
  -4   1   8   32.74    3.03
  -4   1   8   34.13    2.16
  -4  -1   8   32.71    2.09
  -4  -1   8   33.69    2.19
  -4   1   8   34.17    2.21
   4   1  -8   27.46    2.36
   4  -1  -8   29.91    2.53
   4   1  -7    5.51    1.30
  -4  -1   7    4.97    0.86
   4  -1  -7    4.88    1.25
  -4   1   7    4.06    0.95
  -4  -1   7    4.39    0.96
  -4  -1   7    5.37    1.02
  -4   1   7    4.96    0.97
  -4   1   7    5.02    1.22
   4   1  -6    2.08    1.05
  -4  -1   6    2.42    0.65
  -4  -1   6    1.66    0.93
  -4   1   6    1.68    0.94
  -4   1   6    2.71    0.77
  -4  -1   6    2.22    0.73
  -4  -1   6    1.96    0.75
  -4   1   6    1.98    0.76
   4  -1  -6    1.19    0.65
  -4   1   6    2.81    0.81
  -4   1   6    1.69    0.97
  -4  -1   5   57.74    3.48
  -4   1   5   53.88    3.37
  -4   1   5   52.48    2.37
  -4  -1   5   52.45    2.38
  -4   1   5   49.33    2.45
   4  -1  -5   50.52    2.78
  -4   1   5   52.11    2.33
  -4  -1   5   53.01    2.89
  -4   1   5   47.47    2.73
  -4  -1   5   55.65    2.51
  -4   1   5   51.72    2.47
   4   1  -5   54.86    3.37
  -4  -1   4   84.08    4.05
  -4   1   4   89.21    4.16
  -4   1   4   89.07    3.12
   4   1  -4   87.55    3.24
  -4  -1   4   87.88    3.24
   4  -1  -4   79.87    3.60
  -4  -1   4   86.88    3.91
  -4   1   4   83.79    3.81
   4   1  -4   87.49    4.26
  -4  -1   3    0.65    0.68
  -4   1   3    0.45    0.65
   4   1  -3    0.58    0.51
   4  -1  -3    0.39    0.50
  -4  -1   3    2.09    0.95
  -4  -1   2  128.96    4.46
  -4   1   2  123.67    4.48
   4   1  -2  131.37    4.19
   4  -1  -2  122.94    4.43
  -4  -1   2  130.18    4.95
  -4   1   2  122.81    4.75
   4   1  -2  137.82    5.17
  -4  -1   1   75.91    2.96
  -4   1   1   74.84    3.03
   4   1  -1   74.91    3.07
   4  -1  -1   70.64    3.27
  -4  -1   1   73.66    3.64
  -4   1   1   74.94    3.57
   4  -1  -1   72.22    2.63
   4   1  -1   73.49    3.63
   4   1   0   59.44    2.87
   4  -1   0   64.15    3.13
  -4  -1   0   62.33    2.81
  -4   1   0   57.47    2.73
  -4   1   0   64.31    2.46
   4  -1   0   64.43    2.62
   4   1   0   63.98    3.30
   4   1   1  401.56    9.78
   4  -1   1  388.30    9.97
  -4  -1  -1  375.76    9.68
  -4   1  -1  391.44    9.79
  -4  -1  -1  396.22   10.34
  -4   1  -1  386.96   10.18
   4  -1   1  391.18    9.31
   4   1   1  383.93    9.94
   4  -1   1  393.14   10.01
   4   1   2   49.70    2.75
   4  -1   2   51.82    2.90
  -4  -1  -2   41.19    2.64
  -4  -1  -2   41.49    2.10
  -4   1  -2   38.07    2.57
  -4   1  -2   42.56    2.15
  -4  -1  -2   44.86    2.80
  -4   1  -2   49.61    2.85
   4   1   2   45.36    2.56
   4  -1   2   44.86    2.53
   4   1   3  122.07    4.80
  -4  -1  -3  118.71    4.99
  -4  -1  -3  119.00    3.97
  -4   1  -3  125.00    5.10
  -4  -1  -3  121.36    3.89
  -4   1  -3  124.05    3.98
  -4  -1  -3  123.81    4.86
  -4   1  -3  129.18    4.80
   4   1   3  120.29    4.81
   4  -1   3  121.90    4.60
   4   1   3  117.78    4.32
   4   1   4  210.08    5.73
   4  -1   4  201.49    5.69
   4   1   4  207.20    6.91
  -4  -1  -4  205.53    7.25
  -4  -1  -4  198.89    5.70
  -4   1  -4  199.34    7.19
  -4   1  -4  196.13    5.75
  -4   1  -4  195.74    5.21
   4  -1   4  197.53    6.40
  -4  -1  -4  202.39    5.54
  -4   1  -4  194.49    5.55
  -4  -1  -4  206.34    6.57
  -4   1  -4  209.41    6.43
   4   1   4  203.90    6.74
   4   1   5   34.00    2.10
   4  -1   5   30.44    2.02
   4  -1   5   32.41    2.64
  -4  -1  -5   33.90    2.07
  -4  -1  -5   29.68    2.78
  -4   1  -5   30.86    2.81
  -4   1  -5   39.46    2.27
  -4   1  -5   36.75    2.26
  -4  -1  -5   35.39    1.96
  -4   1  -5   32.75    1.90
  -4  -1  -5   33.62    2.28
   4   1   5   34.04    2.58
   4  -1   5   37.05    2.54
   4   1   6    2.59    0.86
   4  -1   6    2.10    0.84
   4  -1   6    2.69    0.96
  -4  -1  -6    1.40    1.02
  -4   1  -6    2.95    1.18
   4   1   6    2.86    1.01
  -4  -1  -6    2.76    0.75
  -4   1  -6    3.19    0.71
  -4  -1  -6    1.35    0.73
  -4   1  -6    1.71    0.79
   4   1   7   36.45    2.43
   4  -1   7   37.76    2.44
  -4  -1  -7   36.43    2.10
  -4   1  -7   40.01    2.27
  -4  -1  -7   37.73    3.35
  -4   1  -7   31.67    3.10
   4  -1   7   33.96    2.56
  -4  -1  -7   37.94    1.95
  -4   1  -7   35.83    1.92
   4   1   7   37.61    2.83
   4   1   7   38.02    2.13
   4  -1   7   35.46    2.17
   4  -1   8    4.01    1.05
   4   1   8    6.56    1.38
  -4  -1  -8    4.78    0.85
  -4   1  -8    4.20    0.86
   4   1   8    5.01    1.04
   4  -1   8    4.73    1.05
  -4  -1  -9   86.42    5.01
  -4   1  -9   83.78    4.89
   4   1   9   91.76    3.49
   4  -1   9   92.74    3.62
   4   1   9   90.77    3.60
   4   1  10   33.86    2.15
   4  -1  10   29.29    2.04
   4   1  10   25.56    1.47
   4   1  10   26.72    1.68
   4  -1  10   28.41    1.83
   4   1  10   27.91    1.77
   4  -1  10   29.03    1.78
   4  -1  11    1.95    0.57
   4   1  11    1.69    0.71
   4  -1  11    1.70    0.70
   4   1  11    1.56    0.60
   4  -1  11    1.76    0.66
   4   1  11    1.88    0.55
   4  -1  12    4.38    0.57
  -4  -2  14    3.10    0.43
  -4  -2  13    6.52    0.81
  -4   2  13    5.53    0.74
  -4  -2  12   47.57    2.27
  -4   2  12   52.96    2.35
  -4  -2  12   51.58    2.16
  -4  -2  11    4.66    0.92
  -4   2  11    5.97    1.06
  -4  -2  11    6.56    1.02
  -4   2  11    6.71    0.97
  -4  -2  10    2.43    0.80
  -4   2  10    4.05    1.04
  -4  -2  10    2.83    0.95
  -4   2  10    3.37    0.91
  -4  -2   9   10.22    1.27
  -4   2   9   10.56    1.90
  -4   2   9   10.99    1.29
  -4  -2   9   10.40    1.34
  -4   2   9   10.95    1.33
  -4  -2   8   31.13    1.97
  -4   2   8   28.69    2.88
  -4   2   8   31.96    2.04
  -4  -2   8   32.35    2.16
  -4   2   8   33.81    2.17
  -4   2   8   29.71    2.01
   4   2  -8   30.84    2.45
   4  -2  -8   28.84    2.55
  -4  -2   7   24.33    1.67
  -4   2   7   25.91    1.80
  -4  -2   7   24.99    1.85
  -4   2   7   22.18    1.79
   4  -2  -7   25.22    2.09
  -4   2   7   24.03    1.89
   4   2  -7   26.76    2.31
  -4  -2   6   37.60    1.94
  -4   2   6   31.71    2.79
  -4   2   6   35.02    1.97
  -4   2   6   33.26    2.09
  -4  -2   6   33.94    2.07
  -4   2   6   31.77    2.03
   4  -2  -6   34.15    2.39
  -4   2   6   28.22    2.04
   4   2  -6   32.18    2.56
  -4   2   5  193.56    6.96
  -4   2   5  195.95    5.27
  -4   2   5  186.42    5.46
   4  -2  -5  188.81    6.20
  -4   2   5  188.70    5.24
  -4  -2   5  190.37    6.17
  -4   2   5  189.94    6.09
  -4   2   5  184.34    5.39
  -4   2   5  194.91    5.07
   4   2  -5  201.15    6.88
  -4  -2   4   32.78    2.44
  -4   2   4   31.08    2.43
  -4  -2   4   28.94    1.68
  -4   2   4   29.03    1.69
  -4  -2   4   28.30    1.75
   4  -2  -4   26.14    2.09
  -4   2   4   29.43    1.72
  -4  -2   4   29.69    2.24
  -4   2   4   31.88    2.25
  -4   2   4   27.45    1.82
   4   2  -4   29.32    2.42
  -4   2   3  164.05    5.67
   4   2  -3  164.52    4.49
   4  -2  -3  147.43    5.29
  -4  -2   3  157.62    5.65
  -4   2   3  167.81    5.61
   4  -2  -3  156.55    4.45
  -4   2   2  240.93    6.94
   4   2  -2  235.85    6.08
   4  -2  -2  256.08    7.11
  -4  -2   2  217.31    7.12
  -4   2   2  245.23    7.21
   4   2  -2  242.72    7.42
   4  -2  -2  227.99    5.98
   4   2  -1    0.72    0.78
   4  -2  -1    1.57    0.60
  -4   2   1    1.04    0.63
   4   2  -1    2.62    0.69
  -4   2   1    1.21    0.58
  -4  -2   1    0.12    0.92
  -4   2   1    0.45    0.74
  -4   2   0  214.15    5.63
   4   2   0  217.50    5.98
   4  -2   0  212.95    6.53
  -4  -2   0  206.76    5.90
  -4   2   0  211.14    5.98
  -4   2   0  205.16    5.78
   4   2   0  208.63    6.64
   4  -2   0  217.84    5.94
   4   2   1  360.48    8.82
   4  -2   1  349.70    9.26
  -4  -2  -1  339.88    8.91
  -4   2  -1  333.49    8.86
  -4  -2  -1  350.80    9.57
  -4   2  -1  346.94    9.29
  -4   2  -1  332.92    8.47
   4   2   1  340.70    9.14
   4  -2   1  340.29    8.68
   4   2   2   73.82    3.40
  -4  -2  -2   76.66    3.65
  -4   2  -2   72.21    3.58
  -4   2  -2   69.61    2.84
  -4  -2  -2   79.45    3.82
  -4   2  -2   70.95    3.46
   4  -2   2   74.20    3.27
   4   2   2   76.06    3.44
   4  -2   2   73.91    3.41
   4  -2   2   75.13    3.38
   4   2   3   42.71    2.10
   4   2   3   46.10    2.77
  -4  -2  -3   43.31    2.21
  -4  -2  -3   49.23    3.09
  -4   2  -3   42.10    2.85
  -4   2  -3   46.13    2.10
  -4  -2  -3   42.70    2.12
  -4   2  -3   43.92    2.21
  -4  -2  -3   44.99    2.85
  -4   2  -3   45.13    2.68
   4   2   3   43.51    2.81
   4  -2   3   44.41    2.54
   4   2   3   43.11    2.51
   4   2   4   42.27    2.25
   4  -2   4   44.38    2.29
   4   2   4   43.68    2.88
   4  -2   4   47.56    3.10
  -4  -2  -4   41.58    2.74
  -4  -2  -4   41.38    2.22
  -4  -2  -4   48.74    3.33
  -4   2  -4   43.32    3.10
  -4   2  -4   44.02    2.34
  -4   2  -4   43.21    2.02
  -4  -2  -4   44.20    2.18
  -4   2  -4   47.11    2.31
  -4  -2  -4   48.71    2.93
  -4   2  -4   47.82    2.69
   4   2   4   39.90    2.79
   4  -2   4   46.80    2.66
   4   2   5   48.37    2.52
   4  -2   5   45.03    2.45
   4  -2   5   44.48    3.12
   4  -2   5   42.11    2.62
   4   2   5   43.75    3.01
  -4  -2  -5   46.47    3.14
  -4  -2  -5   47.22    2.41
  -4  -2  -5   41.93    3.26
  -4   2  -5   45.27    3.35
  -4   2  -5   42.58    2.41
  -4  -2  -5   45.48    2.26
  -4   2  -5   43.08    2.26
  -4  -2  -5   42.54    2.66
   4   2   6  131.77    4.67
   4  -2   6  129.03    4.62
   4   2   6  129.55    5.52
   4  -2   6  128.69    5.68
   4  -2   6  122.66    4.92
  -4  -2  -6  119.70    4.18
  -4  -2  -6  129.56    5.79
  -4  -2  -6  125.88    6.07
  -4   2  -6  131.48    6.12
  -4   2  -6  120.13    4.42
  -4  -2  -6  132.53    4.16
  -4   2  -6  123.84    4.13
   4   2   7   96.18    4.02
   4  -2   7   93.30    3.98
  -4  -2  -7   92.82    3.50
  -4  -2  -7   89.55    5.25
  -4   2  -7   83.17    4.95
  -4   2  -7   95.30    3.79
  -4  -2  -7  103.53    3.43
  -4   2  -7   98.93    3.38
   4   2   7   95.74    4.74
   4  -2   7   89.05    4.14
   4   2   7   92.10    3.44
   4  -2   7   98.15    3.81
   4   2   8    6.48    1.14
   4  -2   8    5.89    1.18
   4   2   8    6.04    1.32
  -4  -2  -8    5.82    0.85
  -4   2  -8    5.82    1.02
   4   2   8    5.45    0.99
   4  -2   8    8.30    1.24
   4   2   9   14.19    1.59
  -4   2  -9   16.00    1.28
  -4  -2  -9   13.26    2.11
  -4   2  -9   13.55    2.10
   4   2   9   14.57    1.36
   4  -2   9   17.56    1.59
   4   2   9   13.85    1.44
   4   2  10   54.46    2.74
   4  -2  10   47.20    2.60
   4   2  10   54.11    2.21
   4   2  10   51.15    2.28
   4  -2  10   52.46    2.50
   4   2  10   48.13    2.36
   4  -2  10   49.70    2.36
   4  -2  11    8.49    1.05
   4   2  11    9.44    0.82
   4   2  11    8.71    0.86
   4  -2  11   10.73    1.06
   4   2  11    7.28    0.84
   4  -2  11    7.98    0.83
   4  -2  12    0.33    0.44
   4  -2  12    0.27    0.41
  -4  -3  14    4.24    0.48
  -4  -3  13    0.25    0.48
  -4   3  13    1.47    0.52
  -4  -3  13    0.92    0.54
  -4  -3  12   28.57    1.84
  -4   3  12   30.25    1.77
  -4  -3  11    7.54    1.11
  -4   3  11    8.89    1.17
  -4  -3  11    7.22    1.08
  -4  -3  11    8.32    1.13
  -4   3  11    7.35    0.99
  -4  -3  10    2.32    0.89
  -4   3  10    1.93    1.13
  -4   3  10    2.20    0.81
  -4  -3  10    2.94    0.88
  -4  -3  10    2.57    0.82
  -4   3  10    2.21    0.87
  -4  -3   9    2.15    0.85
  -4   3   9    2.18    1.31
  -4   3   9    2.68    0.85
  -4  -3   9    3.60    0.95
  -4  -3   9    1.69    0.80
  -4   3   9    2.32    0.89
  -4   3   9    1.47    1.03
  -4  -3   8    3.23    0.86
  -4   3   8    3.78    1.47
  -4   3   8    3.75    0.92
  -4  -3   8    4.24    1.02
  -4  -3   8    2.35    0.83
  -4   3   8    2.82    0.89
  -4   3   8    1.02    1.21
  -4  -3   7  225.31    6.09
  -4   3   7  231.63    6.17
  -4  -3   7  230.42    6.16
  -4  -3   7  231.46    6.43
  -4   3   7  213.76    6.32
   4  -3  -7  214.16    7.22
  -4   3   7  211.07    6.14
   4   3  -7  219.23    7.39
  -4  -3   6    3.02    0.78
  -4   3   6    2.13    1.13
  -4   3   6    2.32    0.78
  -4  -3   6    2.65    0.82
   4   3  -6    2.35    0.96
  -4  -3   6    1.99    0.81
  -4   3   6    2.41    0.81
  -4   3   6    1.33    0.65
   4  -3  -6    1.49    0.83
  -4   3   6    2.00    0.73
  -4   3   6    1.11    1.11
  -4   3   5  420.06   10.46
  -4   3   5  413.33   11.57
  -4   3   5  405.68    9.58
  -4   3   5  430.30    9.38
  -4  -3   5  438.53    9.41
  -4   3   5  421.31    9.76
   4  -3  -5  444.11   11.06
  -4   3   5  414.79    9.44
  -4  -3   5  402.15   10.54
   4   3  -5  424.57   11.30
   4   3  -4    9.14    1.42
   4  -3  -4    7.25    1.01
  -4   3   4    8.37    1.41
  -4  -3   4    8.26    0.96
  -4   3   4    9.29    1.01
  -4  -3   4    9.22    1.06
  -4   3   4    6.86    1.11
  -4  -3   4    9.49    0.95
  -4   3   4    9.04    1.03
   4  -3  -4    7.67    1.26
  -4  -3   4    7.83    1.32
  -4   3   4    8.12    1.25
   4  -3  -3    5.72    0.85
  -4   3   3    6.01    1.16
   4  -3  -3    4.58    1.06
  -4  -3   3    5.40    1.18
  -4   3   3    5.28    1.08
  -4   3   2   10.66    1.33
   4   3  -2   11.01    0.96
   4  -3  -2   13.61    1.61
  -4  -3   2   12.08    1.60
  -4   3   2   11.13    1.42
  -4   3   2   10.80    1.20
   4   3  -2   11.13    1.53
   4  -3  -2   11.02    1.14
   4   3  -1    2.34    0.91
   4  -3  -1    1.53    0.64
  -4   3   1    0.76    0.58
   4   3  -1    1.28    0.53
  -4   3   1    0.22    0.52
   4  -3  -1    1.72    0.85
  -4  -3   1    1.40    0.74
  -4  -3   1    1.17    0.97
  -4   3   1    1.17    0.64
  -4   3   1    0.68    0.75
  -4   3   0  278.54    7.05
   4   3   0  281.31    7.06
   4  -3   0  279.59    7.94
  -4  -3   0  268.34    7.19
  -4   3   0  267.25    7.22
  -4  -3   0  251.20    8.03
  -4  -3   0  262.11    7.40
  -4   3   0  269.19    7.32
   4   3   0  273.33    7.92
   4  -3   0  271.24    7.36
   4   3   1    3.66    0.98
   4  -3   1    4.85    0.94
   4   3   1    3.12    0.82
  -4   3  -1    6.46    1.10
  -4  -3  -1    4.10    0.83
  -4  -3  -1    4.11    1.14
  -4   3  -1    4.01    0.88
  -4   3  -1    3.32    1.01
   4   3   2   88.54    3.70
  -4  -3  -2   84.81    3.25
  -4   3  -2   84.82    3.96
   4   3   2   86.46    3.79
  -4   3  -2   81.77    3.15
  -4  -3  -2   87.34    4.17
  -4   3  -2   92.00    3.95
   4  -3   2   82.80    3.43
   4  -3   2   92.70    4.01
  -4  -3  -2   86.99    3.69
   4   3   3  225.42    5.92
  -4  -3  -3  222.72    7.01
   4  -3   3  217.90    5.83
   4   3   3  235.27    7.03
   4  -3   3  235.47    7.48
  -4  -3  -3  215.18    5.92
  -4   3  -3  230.70    7.44
   4  -3   3  223.26    6.40
  -4  -3  -3  224.86    5.58
  -4   3  -3  198.13    5.92
  -4  -3  -3  223.34    5.89
  -4   3  -3  224.20    6.06
  -4  -3  -3  226.61    7.30
  -4   3  -3  236.03    6.93
   4   3   3  220.87    6.67
   4  -3   3  220.97    7.17
   4   3   4  113.88    3.97
   4  -3   4  116.82    4.01
  -4  -3  -4  118.11    4.99
   4  -3   4  116.74    5.11
  -4  -3  -4  114.90    3.93
  -4  -3  -4  110.29    5.22
  -4   3  -4  117.32    5.29
  -4   3  -4  106.97    3.98
  -4  -3  -4  116.00    3.84
  -4   3  -4  109.21    3.89
  -4  -3  -4  124.99    5.05
   4   3   4  112.36    4.95
   4  -3   4  119.94    4.34
  -4   3  -4  119.70    4.46
   4   3   5  157.62    5.04
   4  -3   5  150.44    4.97
   4  -3   5  152.12    5.23
   4  -3   5  150.68    6.15
  -4  -3  -5  158.87    6.26
  -4  -3  -5  155.95    4.77
  -4  -3  -5  147.49    6.46
  -4   3  -5  150.93    6.39
  -4   3  -5  143.14    4.91
  -4  -3  -5  157.86    4.69
  -4   3  -5  153.41    4.81
  -4  -3  -5  153.86    5.64
   4   3   5  143.75    5.93
   4   3   6    4.86    1.06
   4  -3   6    5.11    1.06
   4   3   6    2.78    1.03
  -4  -3  -6    4.44    1.28
   4  -3   6    4.45    1.22
  -4  -3  -6    2.67    1.31
  -4   3  -6    4.12    1.39
   4  -3   6    4.11    0.95
  -4  -3  -6    5.78    0.95
  -4   3  -6    3.99    0.82
  -4  -3  -6    4.44    0.92
  -4   3  -6    5.84    1.12
   4   3   7  191.20    6.09
   4  -3   7  192.51    6.14
  -4  -3  -7  188.09    5.35
  -4  -3  -7  176.13    7.41
   4   3   7  185.15    7.06
  -4  -3  -7  190.55    7.93
  -4   3  -7  196.96    7.86
  -4   3  -7  189.01    5.81
  -4   3  -7  192.01    5.28
   4   3   7  184.05    5.81
   4  -3   8   52.66    2.95
  -4  -3  -8   52.36    3.98
  -4   3  -8   47.42    2.49
   4  -3   8   51.65    2.73
   4   3   8   48.31    3.32
   4   3   8   47.61    2.34
   4   3   8   50.11    2.68
   4   3   9    3.11    0.91
   4   3   9    3.64    1.02
  -4   3  -9    2.72    0.72
   4   3   9    3.02    0.78
   4  -3   9    3.14    0.98
   4  -3  10   30.26    2.08
   4   3  10   34.25    1.75
   4   3  10   35.07    1.74
   4  -3  10   34.67    2.04
   4   3  10   34.52    1.94
   4  -3  11    8.60    1.04
   4   3  11    8.50    0.81
   4  -3  11    9.89    1.05
   4   3  11    7.96    0.84
   4  -3  11    6.88    0.75
   4  -3  12    0.41    0.41
   4  -3  12    0.30    0.39
  -4  -4  14    2.65    0.40
  -4  -4  13    0.05    0.47
  -4   4  13    0.19    0.45
  -4  -4  13    0.22    0.49
  -4  -4  12   22.78    1.63
  -4   4  12   23.31    1.49
  -4  -4  12   25.29    1.60
  -4  -4  12   23.08    1.47
  -4  -4  11  106.41    4.01
  -4   4  11  112.53    3.86
  -4  -4  11  107.71    3.91
  -4  -4  11  115.63    3.99
  -4   4  11  116.58    3.79
  -4  -4  10   54.34    2.76
  -4   4  10   48.91    3.82
  -4   4  10   57.40    2.73
  -4   4  10   59.75    2.71
  -4  -4  10   55.71    2.70
  -4  -4  10   54.81    2.77
  -4   4  10   56.57    2.74
  -4  -4   9  185.92    5.71
  -4   4   9  186.28    7.88
  -4   4   9  194.35    5.58
  -4  -4   9  200.53    5.72
  -4  -4   9  196.76    5.93
  -4   4   9  194.78    5.85
  -4   4   9  188.86    5.68
  -4  -4   8   38.11    2.25
  -4   4   8   35.53    3.27
  -4   4   8   39.96    2.24
  -4  -4   8   34.94    2.12
  -4  -4   8   34.96    2.27
  -4   4   8   37.30    2.33
   4  -4  -8   34.91    2.79
  -4   4   8   35.84    2.38
  -4   4   8   30.45    2.18
   4   4  -7    0.29    0.65
  -4  -4   7    0.25    0.66
  -4   4   7    1.43    0.73
  -4  -4   7    0.77    0.67
  -4  -4   7    0.27    0.75
  -4   4   7    0.28    0.73
   4  -4  -7    0.94    0.84
  -4   4   7   -0.71    1.35
   4   4  -6    5.57    1.25
  -4  -4   6    5.19    0.91
  -4   4   6    7.02    0.99
  -4  -4   6    5.71    0.95
  -4  -4   6    4.98    0.94
  -4   4   6    5.33    1.00
  -4   4   6    6.69    0.97
   4  -4  -6    5.99    1.30
  -4   4   6    6.27    1.08
  -4   4   6    4.31    1.12
  -4   4   5  231.77    8.00
  -4   4   5  235.25    5.89
  -4  -4   5  227.23    5.85
  -4  -4   5  230.60    6.15
  -4   4   5  219.54    6.25
   4  -4  -5  233.47    7.50
  -4   4   5  219.24    5.98
  -4   4   5  226.97    6.85
  -4  -4   5  220.68    6.95
  -4   4   5  219.08    6.18
  -4   4   5  190.98    5.65
   4   4  -5  240.53    7.65
   4  -4  -5  199.50    6.65
   4   4  -4    1.55    1.01
   4  -4  -4   -0.11    0.63
  -4   4   4    1.05    0.94
  -4  -4   4    0.61    0.61
  -4   4   4    0.41    0.58
  -4  -4   4    0.49    0.63
  -4   4   4    0.86    0.65
   4  -4  -4    0.82    0.84
  -4   4   4    0.14    0.59
  -4   4   4   -0.07    0.90
  -4  -4   4    0.39    0.77
  -4   4   4    0.92    0.67
  -4   4   3   95.32    4.30
   4  -4  -3   84.03    4.14
  -4  -4   3   92.95    3.11
  -4   4   3   89.42    3.25
  -4  -4   3   88.30    4.20
  -4   4   3   95.62    4.05
  -4   4   3   81.98    3.21
   4  -4  -3   91.66    3.72
  -4   4   2   79.16    3.68
   4  -4  -2   70.44    3.68
  -4   4   2   73.98    2.88
  -4  -4   2   75.82    3.87
  -4   4   2   74.47    3.61
  -4   4   2   79.97    3.55
  -4  -4   2   75.56    3.74
   4   4  -2   74.27    3.77
   4  -4  -2   74.17    3.26
  -4   4   1  355.12    9.33
   4   4  -1  367.34    8.28
   4  -4  -1  375.82   10.01
   4   4  -1  349.87    8.43
  -4  -4   1  376.16    9.82
  -4   4   1  361.13    8.82
  -4  -4   1  372.52   10.23
  -4   4   1  374.16    9.74
  -4   4   1  364.31    9.43
   4   4  -1  389.03   10.10
   4  -4  -1  372.02    9.32
  -4   4   0  556.90   12.37
   4   4   0  545.71   11.88
  -4   4   0  541.73   12.46
  -4  -4   0  544.43   12.95
  -4  -4   0  542.16   12.30
  -4  -4   0  547.12   13.60
  -4   4   0  528.88   12.73
   4   4   0  564.15   13.31
   4  -4   0  539.54   12.73
  -4   4  -1    6.83    0.94
   4   4   1    6.36    1.14
   4  -4   1    6.93    1.18
  -4   4  -1    5.55    0.80
   4   4   1    7.57    1.01
  -4   4  -1    7.33    1.18
  -4  -4  -1    7.23    0.88
  -4   4  -1    5.88    0.90
  -4  -4  -1    7.47    1.14
  -4   4  -1    6.47    1.14
  -4  -4  -1    6.79    0.89
  -4   4  -1    6.03    1.20
  -4  -4  -1    6.35    1.07
   4  -4   2  118.82    4.99
  -4  -4  -2  118.81    3.86
  -4   4  -2  120.13    4.90
  -4  -4  -2  124.08    3.70
   4  -4   2  134.53    5.09
  -4   4  -2  109.83    3.93
  -4  -4  -2  118.84    5.13
   4  -4   2  118.24    4.05
  -4   4  -2  127.39    4.78
  -4  -4  -2  114.62    4.21
[truncated: 213,563 more chars]
