# Supplementary material
Source: MDPI journal article supplement (https://www.mdpi.com/2304-6740/7/11/134)
Supplement: s1 [file s1 › maw160817.cif]

 
data_maw160817
 
_audit_creation_method            'SHELXL-2016/6'
_shelx_SHELXL_version_number      '2016/6'
_chemical_name_systematic         ?
_chemical_name_common             [Re(CO)3(HOSAAC)]PF6  
_chemical_melting_point           ?
_chemical_formula_moiety          'C26 H23 N3 O4 Re, F6 P' 
_chemical_formula_sum
 'C26 H23 F6 N3 O4 P Re' 
_chemical_formula_weight          772.64

loop_
 _atom_type_symbol
 _atom_type_description
 _atom_type_scat_dispersion_real
 _atom_type_scat_dispersion_imag
 _atom_type_scat_source
 'C'  'C'   0.0033   0.0016
 'International Tables Vol C Tables 4.2.6.8 and 6.1.1.4'
 'H'  'H'   0.0000   0.0000
 'International Tables Vol C Tables 4.2.6.8 and 6.1.1.4'
 'N'  'N'   0.0061   0.0033
 'International Tables Vol C Tables 4.2.6.8 and 6.1.1.4'
 'O'  'O'   0.0106   0.0060
 'International Tables Vol C Tables 4.2.6.8 and 6.1.1.4'
 'F'  'F'   0.0171   0.0103
 'International Tables Vol C Tables 4.2.6.8 and 6.1.1.4'
 'P'  'P'   0.1023   0.0942
 'International Tables Vol C Tables 4.2.6.8 and 6.1.1.4'
 'Re'  'Re'  -1.0185   7.2310
 'International Tables Vol C Tables 4.2.6.8 and 6.1.1.4'
 
_space_group_crystal_system       monoclinic
_space_group_IT_number            14
_space_group_name_H-M_alt         'P 21/c'
_space_group_name_Hall            '-P 2ybc'
 
_shelx_space_group_comment
;
The symmetry employed for this shelxl refinement is uniquely defined
by the following loop, which should always be used as a source of
symmetry information in preference to the above space-group names.
They are only intended as comments.
;
 
loop_
 _space_group_symop_operation_xyz
 'x, y, z'
 '-x, y+1/2, -z+1/2'
 '-x, -y, -z'
 'x, -y-1/2, z-1/2'
 
_cell_length_a                    17.3858(4)
_cell_length_b                    9.8329(2)
_cell_length_c                    17.3855(4)
_cell_angle_alpha                 90
_cell_angle_beta                  110.109(2)
_cell_angle_gamma                 90
_cell_volume                      2790.92(11)
_cell_formula_units_Z             4
_cell_measurement_temperature     160.00(10) 
_cell_measurement_reflns_used     63737
_cell_measurement_theta_min       2.3800 
_cell_measurement_theta_max       33.5400
 
_exptl_crystal_description        prism
_exptl_crystal_colour             colorless 
_exptl_crystal_density_meas       ?
_exptl_crystal_density_method     ?
_exptl_crystal_density_diffrn     1.839          
_exptl_crystal_F_000              1504
_exptl_transmission_factor_min    ?
_exptl_transmission_factor_max    ?
_exptl_crystal_size_max           0.119
_exptl_crystal_size_mid           0.106
_exptl_crystal_size_min           0.071
_exptl_absorpt_coefficient_mu     4.489
_shelx_estimated_absorpt_T_min    0.617
_shelx_estimated_absorpt_T_max    0.741
_exptl_absorpt_correction_type    multi-scan 
_exptl_absorpt_correction_T_min   0.6172 
_exptl_absorpt_correction_T_max   0.7411
_exptl_absorpt_process_details    
;
CrysAlisPro 1.171.39.27e (Rigaku Oxford Diffraction, 2015)
Empirical absorption correction using spherical harmonics,
 implemented in SCALE3 ABSPACK scaling algorithm.
;
_exptl_absorpt_special_details    ?
_diffrn_ambient_temperature       160.00(10) 
_diffrn_radiation_wavelength      0.71073
_diffrn_radiation_type            MoK\a
_diffrn_source                    'fine-focus sealed tube'
_diffrn_measurement_device_type   'XtaLAB Synergy, Dualflex, Pilatus 200K' 
_diffrn_measurement_method        '\w scans'
_diffrn_detector_area_resol_mean  200000 
_diffrn_reflns_number             128917
_diffrn_reflns_av_unetI/netI      0.0227
_diffrn_reflns_av_R_equivalents   0.0603
_diffrn_reflns_limit_h_min        -24
_diffrn_reflns_limit_h_max        24
_diffrn_reflns_limit_k_min        -14
_diffrn_reflns_limit_k_max        14
_diffrn_reflns_limit_l_min        -24
_diffrn_reflns_limit_l_max        24
_diffrn_reflns_theta_min          2.375
_diffrn_reflns_theta_max          30.508
_diffrn_reflns_theta_full         25.242
_diffrn_measured_fraction_theta_max   1.000
_diffrn_measured_fraction_theta_full  1.000
_diffrn_reflns_Laue_measured_fraction_max    1.000
_diffrn_reflns_Laue_measured_fraction_full   1.000
_diffrn_reflns_point_group_measured_fraction_max   1.000
_diffrn_reflns_point_group_measured_fraction_full  1.000
_reflns_number_total              8524
_reflns_number_gt                 7691
_reflns_threshold_expression      'I > 2\s(I)'
_reflns_Friedel_coverage          0.000
_reflns_Friedel_fraction_max      .
_reflns_Friedel_fraction_full     .
 
_reflns_special_details
;
 Reflections were merged by SHELXL according to the crystal
 class for the calculation of statistics and refinement.
 
 _reflns_Friedel_fraction is defined as the number of unique
 Friedel pairs measured divided by the number that would be
 possible theoretically, ignoring centric projections and
 systematic absences.
;
 
_computing_data_collection        'CrysAlisPro 1.171.39.27e (Rigaku OD, 2015)' 
_computing_cell_refinement        'CrysAlisPro 1.171.39.27e (Rigaku OD, 2015)' 
_computing_data_reduction         'CrysAlisPro 1.171.39.27e (Rigaku OD, 2015)' 
_computing_structure_solution     'SHELXS-97 (Sheldrick, 1990)' 
_computing_structure_refinement 'SHELXL-2016/6 (Sheldrick, 2016)'
_computing_molecular_graphics     'ORTEP-3 (Farrugia, 1997)' 
_computing_publication_material   'SHELXL-2016/6 (Sheldrick, 2016)'
_refine_special_details           ?
_refine_ls_structure_factor_coef  Fsqd
_refine_ls_matrix_type            full
_refine_ls_weighting_scheme       calc
_refine_ls_weighting_details
'w=1/[\s^2^(Fo^2^)+(0.0191P)^2^+3.5291P] where P=(Fo^2^+2Fc^2^)/3'
_atom_sites_solution_primary      ?
_atom_sites_solution_secondary    ?
_atom_sites_solution_hydrogens    geom
_refine_ls_hydrogen_treatment     constr
_refine_ls_extinction_method      none
_refine_ls_extinction_coef        .
_refine_ls_number_reflns          8524
_refine_ls_number_parameters      371
_refine_ls_number_restraints      0
_refine_ls_R_factor_all           0.0275
_refine_ls_R_factor_gt            0.0225
_refine_ls_wR_factor_ref          0.0517
_refine_ls_wR_factor_gt           0.0503
_refine_ls_goodness_of_fit_ref    1.047
_refine_ls_restrained_S_all       1.047
_refine_ls_shift/su_max           0.001
_refine_ls_shift/su_mean          0.000
 
loop_
 _atom_site_label
 _atom_site_type_symbol
 _atom_site_fract_x
 _atom_site_fract_y
 _atom_site_fract_z
 _atom_site_U_iso_or_equiv
 _atom_site_adp_type
 _atom_site_occupancy
 _atom_site_site_symmetry_order  
 _atom_site_calc_flag
 _atom_site_refinement_flags_posn
 _atom_site_refinement_flags_adp
 _atom_site_refinement_flags_occupancy
 _atom_site_disorder_assembly
 _atom_site_disorder_group
Re1 Re 0.31654(2) 0.01806(2) 0.00230(2) 0.02008(3) Uani 1 1 d . . . . .
C1 C 0.43167(15) -0.0075(2) 0.05455(15) 0.0266(5) Uani 1 1 d . . . . .
O1 O 0.50173(11) -0.0132(2) 0.08781(12) 0.0362(4) Uani 1 1 d . . . . .
C2 C 0.33114(15) 0.1474(3) 0.08891(17) 0.0329(5) Uani 1 1 d . . . . .
O2 O 0.34394(14) 0.2228(2) 0.14229(14) 0.0530(6) Uani 1 1 d . . . . .
C3 C 0.34713(15) 0.1517(3) -0.06192(17) 0.0321(5) Uani 1 1 d . . . . .
O3 O 0.36517(14) 0.2313(2) -0.10104(16) 0.0545(6) Uani 1 1 d . . . . .
N1 N 0.18294(11) 0.05310(19) -0.06073(11) 0.0199(3) Uani 1 1 d . . . . .
N2 N 0.28391(11) -0.13503(19) -0.09920(11) 0.0209(3) Uani 1 1 d . . . . .
N3 N 0.26312(11) -0.14149(19) 0.05873(11) 0.0204(3) Uani 1 1 d . . . . .
C4 C 0.16528(15) 0.0119(2) -0.14760(14) 0.0257(4) Uani 1 1 d . . . . .
H4A H 0.183124 0.083207 -0.176199 0.031 Uiso 1 1 calc R U . . .
H4B H 0.106684 0.000265 -0.174218 0.031 Uiso 1 1 calc R U . . .
C5 C 0.20797(14) -0.1178(2) -0.15284(13) 0.0238(4) Uani 1 1 d . . . . .
C6 C 0.16920(16) -0.2111(3) -0.21563(15) 0.0313(5) Uani 1 1 d . . . . .
H6 H 0.115662 -0.196314 -0.250294 0.038 Uiso 1 1 calc R U . . .
C7 C 0.21104(17) -0.3233(3) -0.22497(16) 0.0342(5) Uani 1 1 d . . . . .
H7 H 0.185970 -0.386673 -0.265544 0.041 Uiso 1 1 calc R U . . .
C8 C 0.29258(15) -0.3427(2) -0.17277(15) 0.0277(5) Uani 1 1 d . . . . .
C9 C 0.33986(18) -0.4545(3) -0.18304(18) 0.0369(6) Uani 1 1 d . . . . .
H9 H 0.316178 -0.518532 -0.223684 0.044 Uiso 1 1 calc R U . . .
C10 C 0.41925(19) -0.4688(3) -0.1341(2) 0.0403(6) Uani 1 1 d . . . . .
H10 H 0.450086 -0.541375 -0.141925 0.048 Uiso 1 1 calc R U . . .
C11 C 0.45482(17) -0.3737(3) -0.07151(19) 0.0401(6) Uani 1 1 d . . . . .
H11 H 0.509437 -0.383406 -0.038553 0.048 Uiso 1 1 calc R U . . .
C12 C 0.41003(15) -0.2668(3) -0.05836(17) 0.0331(5) Uani 1 1 d . . . . .
H12 H 0.434066 -0.206654 -0.015518 0.040 Uiso 1 1 calc R U . . .
C13 C 0.32794(14) -0.2473(2) -0.10926(14) 0.0239(4) Uani 1 1 d . . . . .
C14 C 0.13486(13) -0.0334(2) -0.02321(14) 0.0245(4) Uani 1 1 d . . . . .
H14A H 0.086728 -0.067206 -0.066299 0.029 Uiso 1 1 calc R U . . .
H14B H 0.116292 0.022447 0.012957 0.029 Uiso 1 1 calc R U . . .
C15 C 0.18190(13) -0.1521(2) 0.02447(13) 0.0219(4) Uani 1 1 d . . . . .
C16 C 0.13711(14) -0.2646(3) 0.03622(15) 0.0280(5) Uani 1 1 d . . . . .
H16 H 0.080532 -0.267737 0.010826 0.034 Uiso 1 1 calc R U . . .
C17 C 0.17732(16) -0.3688(3) 0.08504(15) 0.0310(5) Uani 1 1 d . . . . .
H17 H 0.148731 -0.445384 0.091546 0.037 Uiso 1 1 calc R U . . .
C18 C 0.26254(15) -0.3599(2) 0.12565(14) 0.0271(5) Uani 1 1 d . . . . .
C19 C 0.30640(19) -0.4622(3) 0.18069(17) 0.0381(6) Uani 1 1 d . . . . .
H19 H 0.279437 -0.540635 0.187334 0.046 Uiso 1 1 calc R U . . .
C20 C 0.3873(2) -0.4469(3) 0.22377(18) 0.0449(7) Uani 1 1 d . . . . .
H20 H 0.415854 -0.515356 0.258952 0.054 Uiso 1 1 calc R U . . .
C21 C 0.42802(18) -0.3279(3) 0.21532(17) 0.0419(7) Uani 1 1 d . . . . .
H21 H 0.482908 -0.316458 0.246946 0.050 Uiso 1 1 calc R U . . .
C22 C 0.38815(15) -0.2279(3) 0.16103(15) 0.0324(5) Uani 1 1 d . . . . .
H22 H 0.416367 -0.150255 0.155468 0.039 Uiso 1 1 calc R U . . .
C23 C 0.30442(14) -0.2427(2) 0.11368(13) 0.0238(4) Uani 1 1 d . . . . .
C24 C 0.16082(14) 0.2012(2) -0.05750(14) 0.0250(4) Uani 1 1 d . . . . .
H24A H 0.195437 0.255013 -0.079223 0.030 Uiso 1 1 calc R U . . .
H24B H 0.174019 0.226506 -0.000483 0.030 Uiso 1 1 calc R U . . .
C25 C 0.07204(14) 0.2404(2) -0.10336(14) 0.0243(4) Uani 1 1 d . . . . .
H25A H 0.056870 0.215956 -0.160718 0.029 Uiso 1 1 calc R U . . .
H25B H 0.036038 0.192700 -0.080479 0.029 Uiso 1 1 calc R U . . .
C26 C 0.06411(15) 0.3930(3) -0.09476(17) 0.0336(5) Uani 1 1 d . . . . .
H26A H 0.078724 0.416857 -0.037371 0.040 Uiso 1 1 calc R U . . .
H26B H 0.100995 0.440223 -0.116704 0.040 Uiso 1 1 calc R U . . .
O4 O -0.01787(12) 0.4325(2) -0.13806(14) 0.0434(5) Uani 1 1 d . . . . .
H4 H -0.020150 0.515379 -0.143504 0.052 Uiso 1 1 calc R U . . .
P1 P 0.10416(3) 0.18884(6) 0.16907(3) 0.01945(10) Uani 1 1 d . . . . .
F1 F 0.14727(14) 0.3299(2) 0.16976(18) 0.0833(8) Uani 1 1 d . . . . .
F2 F 0.05747(12) 0.2035(3) 0.07332(10) 0.0673(7) Uani 1 1 d . . . . .
F3 F 0.17829(11) 0.1116(2) 0.15208(10) 0.0530(5) Uani 1 1 d . . . . .
F4 F 0.15203(12) 0.1725(2) 0.26409(10) 0.0508(5) Uani 1 1 d . . . . .
F5 F 0.03014(12) 0.2652(2) 0.18411(11) 0.0530(5) Uani 1 1 d . . . . .
F6 F 0.06117(13) 0.0473(2) 0.16800(17) 0.0732(7) Uani 1 1 d . . . . .
 
loop_
 _atom_site_aniso_label
 _atom_site_aniso_U_11
 _atom_site_aniso_U_22
 _atom_site_aniso_U_33
 _atom_site_aniso_U_23
 _atom_site_aniso_U_13
 _atom_site_aniso_U_12
Re1 0.01653(4) 0.01957(5) 0.02228(5) 0.00008(3) 0.00426(3) 0.00014(3)
C1 0.0235(10) 0.0285(12) 0.0264(11) -0.0003(9) 0.0068(9) -0.0013(9)
O1 0.0200(8) 0.0503(12) 0.0344(10) 0.0020(8) 0.0043(7) -0.0001(7)
C2 0.0238(11) 0.0313(13) 0.0397(14) -0.0052(10) 0.0059(10) 0.0020(9)
O2 0.0435(12) 0.0519(13) 0.0556(13) -0.0311(11) 0.0068(10) -0.0001(10)
C3 0.0223(11) 0.0292(12) 0.0421(14) 0.0064(10) 0.0074(10) 0.0016(9)
O3 0.0423(12) 0.0467(13) 0.0777(16) 0.0303(12) 0.0247(12) 0.0003(10)
N1 0.0179(8) 0.0200(8) 0.0200(8) 0.0003(6) 0.0044(7) 0.0020(6)
N2 0.0204(8) 0.0209(9) 0.0210(8) 0.0024(7) 0.0069(7) 0.0015(7)
N3 0.0191(8) 0.0226(9) 0.0175(8) 0.0021(6) 0.0036(7) 0.0025(7)
C4 0.0248(11) 0.0287(11) 0.0202(10) 0.0005(8) 0.0033(8) 0.0068(9)
C5 0.0239(10) 0.0272(11) 0.0197(10) 0.0004(8) 0.0068(8) 0.0018(8)
C6 0.0290(12) 0.0363(13) 0.0235(11) -0.0041(9) 0.0025(9) 0.0025(10)
C7 0.0369(13) 0.0307(13) 0.0297(12) -0.0079(10) 0.0047(10) -0.0018(10)
C8 0.0311(12) 0.0226(11) 0.0293(11) 0.0003(9) 0.0101(10) 0.0007(9)
C9 0.0452(15) 0.0248(12) 0.0418(15) -0.0072(10) 0.0165(12) 0.0036(11)
C10 0.0425(15) 0.0260(13) 0.0545(17) -0.0010(11) 0.0194(13) 0.0093(11)
C11 0.0305(13) 0.0304(14) 0.0561(17) -0.0009(12) 0.0107(12) 0.0092(11)
C12 0.0275(12) 0.0256(12) 0.0422(14) -0.0027(10) 0.0067(10) 0.0036(9)
C13 0.0252(11) 0.0197(10) 0.0282(11) 0.0025(8) 0.0112(9) 0.0018(8)
C14 0.0180(9) 0.0272(11) 0.0273(11) 0.0052(8) 0.0066(8) 0.0029(8)
C15 0.0215(10) 0.0246(11) 0.0194(9) 0.0010(8) 0.0067(8) 0.0014(8)
C16 0.0219(10) 0.0304(12) 0.0299(12) 0.0034(9) 0.0068(9) -0.0029(9)
C17 0.0325(12) 0.0276(12) 0.0322(12) 0.0044(9) 0.0102(10) -0.0035(10)
C18 0.0318(12) 0.0262(11) 0.0227(10) 0.0029(8) 0.0086(9) 0.0031(9)
C19 0.0455(16) 0.0299(14) 0.0357(14) 0.0100(10) 0.0099(12) 0.0058(11)
C20 0.0483(17) 0.0430(16) 0.0347(14) 0.0154(12) 0.0032(12) 0.0143(13)
C21 0.0310(13) 0.0518(17) 0.0343(14) 0.0107(12) 0.0003(11) 0.0079(12)
C22 0.0245(11) 0.0418(14) 0.0269(12) 0.0076(10) 0.0036(9) 0.0024(10)
C23 0.0235(10) 0.0275(11) 0.0183(10) 0.0035(8) 0.0046(8) 0.0044(8)
C24 0.0238(10) 0.0215(11) 0.0274(11) 0.0007(8) 0.0058(9) 0.0042(8)
C25 0.0233(10) 0.0233(11) 0.0241(10) 0.0010(8) 0.0052(8) 0.0055(8)
C26 0.0274(12) 0.0265(12) 0.0390(14) -0.0021(10) 0.0012(10) 0.0074(9)
O4 0.0285(9) 0.0290(10) 0.0620(13) 0.0026(9) 0.0017(9) 0.0110(8)
P1 0.0209(2) 0.0201(3) 0.0162(2) 0.00139(18) 0.00475(19) 0.0028(2)
F1 0.0614(14) 0.0415(11) 0.133(2) 0.0361(13) 0.0152(14) -0.0089(10)
F2 0.0523(11) 0.1212(19) 0.0244(8) 0.0075(10) 0.0078(8) 0.0440(12)
F3 0.0382(9) 0.0877(15) 0.0329(8) 0.0048(9) 0.0121(7) 0.0290(9)
F4 0.0567(11) 0.0644(12) 0.0244(8) -0.0018(7) 0.0052(7) 0.0201(9)
F5 0.0538(11) 0.0668(12) 0.0447(10) 0.0100(9) 0.0250(9) 0.0309(10)
F6 0.0414(11) 0.0374(10) 0.119(2) 0.0114(12) 0.0002(12) -0.0086(8)
 
_geom_special_details
;
 All esds (except the esd in the dihedral angle between two l.s. planes)
 are estimated using the full covariance matrix.  The cell esds are taken
 into account individually in the estimation of esds in distances, angles
 and torsion angles; correlations between esds in cell parameters are only
 used when they are defined by crystal symmetry.  An approximate (isotropic)
 treatment of cell esds is used for estimating esds involving l.s. planes.
;
 
loop_
 _geom_bond_atom_site_label_1
 _geom_bond_atom_site_label_2
 _geom_bond_distance
 _geom_bond_site_symmetry_2
 _geom_bond_publ_flag
Re1 C1 1.909(2) . ?
Re1 C3 1.914(3) . ?
Re1 C2 1.920(3) . ?
Re1 N3 2.2164(18) . ?
Re1 N1 2.2282(17) . ?
Re1 N2 2.2391(18) . ?
C1 O1 1.156(3) . ?
C2 O2 1.149(3) . ?
C3 O3 1.149(3) . ?
N1 C4 1.490(3) . ?
N1 C14 1.491(3) . ?
N1 C24 1.512(3) . ?
N2 C5 1.340(3) . ?
N2 C13 1.389(3) . ?
N3 C15 1.335(3) . ?
N3 C23 1.396(3) . ?
C4 C5 1.494(3) . ?
C5 C6 1.408(3) . ?
C6 C7 1.361(4) . ?
C7 C8 1.409(4) . ?
C8 C13 1.417(3) . ?
C8 C9 1.421(3) . ?
C9 C10 1.357(4) . ?
C10 C11 1.406(4) . ?
C11 C12 1.374(4) . ?
C12 C13 1.410(3) . ?
C14 C15 1.500(3) . ?
C15 C16 1.408(3) . ?
C16 C17 1.360(3) . ?
C17 C18 1.408(4) . ?
C18 C23 1.416(3) . ?
C18 C19 1.417(3) . ?
C19 C20 1.356(4) . ?
C20 C21 1.400(4) . ?
C21 C22 1.375(4) . ?
C22 C23 1.412(3) . ?
C24 C25 1.523(3) . ?
C25 C26 1.519(3) . ?
C26 O4 1.418(3) . ?
P1 F1 1.575(2) . ?
P1 F6 1.577(2) . ?
P1 F4 1.5818(17) . ?
P1 F5 1.5871(17) . ?
P1 F2 1.5879(17) . ?
P1 F3 1.6081(17) . ?
 
loop_
 _geom_angle_atom_site_label_1
 _geom_angle_atom_site_label_2
 _geom_angle_atom_site_label_3
 _geom_angle
 _geom_angle_site_symmetry_1
 _geom_angle_site_symmetry_3
 _geom_angle_publ_flag
C1 Re1 C3 84.93(10) . . ?
C1 Re1 C2 83.09(10) . . ?
C3 Re1 C2 90.83(12) . . ?
C1 Re1 N3 103.11(8) . . ?
C3 Re1 N3 170.65(9) . . ?
C2 Re1 N3 94.82(10) . . ?
C1 Re1 N1 178.28(9) . . ?
C3 Re1 N1 93.36(9) . . ?
C2 Re1 N1 96.76(9) . . ?
N3 Re1 N1 78.61(7) . . ?
C1 Re1 N2 103.11(9) . . ?
C3 Re1 N2 92.74(10) . . ?
C2 Re1 N2 173.10(9) . . ?
N3 Re1 N2 80.89(6) . . ?
N1 Re1 N2 77.14(7) . . ?
O1 C1 Re1 175.1(2) . . ?
O2 C2 Re1 176.5(2) . . ?
O3 C3 Re1 179.4(3) . . ?
C4 N1 C14 109.71(18) . . ?
C4 N1 C24 109.45(17) . . ?
C14 N1 C24 110.20(17) . . ?
C4 N1 Re1 105.86(13) . . ?
C14 N1 Re1 110.06(13) . . ?
C24 N1 Re1 111.48(13) . . ?
C5 N2 C13 117.86(19) . . ?
C5 N2 Re1 112.67(14) . . ?
C13 N2 Re1 129.24(15) . . ?
C15 N3 C23 117.79(19) . . ?
C15 N3 Re1 113.44(14) . . ?
C23 N3 Re1 127.78(14) . . ?
N1 C4 C5 111.11(18) . . ?
N2 C5 C6 123.5(2) . . ?
N2 C5 C4 117.2(2) . . ?
C6 C5 C4 119.2(2) . . ?
C7 C6 C5 119.2(2) . . ?
C6 C7 C8 119.6(2) . . ?
C7 C8 C13 118.9(2) . . ?
C7 C8 C9 121.4(2) . . ?
C13 C8 C9 119.7(2) . . ?
C10 C9 C8 120.6(2) . . ?
C9 C10 C11 119.9(2) . . ?
C12 C11 C10 120.9(3) . . ?
C11 C12 C13 120.6(2) . . ?
N2 C13 C12 120.8(2) . . ?
N2 C13 C8 120.9(2) . . ?
C12 C13 C8 118.3(2) . . ?
N1 C14 C15 113.85(18) . . ?
N3 C15 C16 123.3(2) . . ?
N3 C15 C14 118.6(2) . . ?
C16 C15 C14 117.90(19) . . ?
C17 C16 C15 119.4(2) . . ?
C16 C17 C18 119.5(2) . . ?
C17 C18 C23 118.9(2) . . ?
C17 C18 C19 121.6(2) . . ?
C23 C18 C19 119.5(2) . . ?
C20 C19 C18 120.6(3) . . ?
C19 C20 C21 120.0(3) . . ?
C22 C21 C20 121.1(3) . . ?
C21 C22 C23 120.1(3) . . ?
N3 C23 C22 120.6(2) . . ?
N3 C23 C18 120.8(2) . . ?
C22 C23 C18 118.5(2) . . ?
N1 C24 C25 116.68(19) . . ?
C26 C25 C24 107.95(19) . . ?
O4 C26 C25 109.1(2) . . ?
F1 P1 F6 179.70(17) . . ?
F1 P1 F4 90.18(13) . . ?
F6 P1 F4 89.99(13) . . ?
F1 P1 F5 89.59(13) . . ?
F6 P1 F5 90.64(13) . . ?
F4 P1 F5 92.36(10) . . ?
F1 P1 F2 89.90(15) . . ?
F6 P1 F2 89.92(14) . . ?
F4 P1 F2 178.88(10) . . ?
F5 P1 F2 88.76(10) . . ?
F1 P1 F3 90.46(13) . . ?
F6 P1 F3 89.31(13) . . ?
F4 P1 F3 88.68(9) . . ?
F5 P1 F3 178.96(10) . . ?
F2 P1 F3 90.20(9) . . ?
 
loop_
 _geom_torsion_atom_site_label_1
 _geom_torsion_atom_site_label_2
 _geom_torsion_atom_site_label_3
 _geom_torsion_atom_site_label_4
 _geom_torsion
 _geom_torsion_site_symmetry_1
 _geom_torsion_site_symmetry_2
 _geom_torsion_site_symmetry_3
 _geom_torsion_site_symmetry_4
 _geom_torsion_publ_flag
C14 N1 C4 C5 -75.7(2) . . . . ?
C24 N1 C4 C5 163.27(19) . . . . ?
Re1 N1 C4 C5 43.0(2) . . . . ?
C13 N2 C5 C6 3.7(3) . . . . ?
Re1 N2 C5 C6 -171.26(19) . . . . ?
C13 N2 C5 C4 -172.66(19) . . . . ?
Re1 N2 C5 C4 12.4(2) . . . . ?
N1 C4 C5 N2 -38.9(3) . . . . ?
N1 C4 C5 C6 144.6(2) . . . . ?
N2 C5 C6 C7 -2.2(4) . . . . ?
C4 C5 C6 C7 174.1(2) . . . . ?
C5 C6 C7 C8 -1.1(4) . . . . ?
C6 C7 C8 C13 2.7(4) . . . . ?
C6 C7 C8 C9 -176.7(3) . . . . ?
C7 C8 C9 C10 177.5(3) . . . . ?
C13 C8 C9 C10 -1.9(4) . . . . ?
C8 C9 C10 C11 1.3(5) . . . . ?
C9 C10 C11 C12 0.8(5) . . . . ?
C10 C11 C12 C13 -2.1(4) . . . . ?
C5 N2 C13 C12 175.8(2) . . . . ?
Re1 N2 C13 C12 -10.3(3) . . . . ?
C5 N2 C13 C8 -1.9(3) . . . . ?
Re1 N2 C13 C8 172.05(16) . . . . ?
C11 C12 C13 N2 -176.2(2) . . . . ?
C11 C12 C13 C8 1.5(4) . . . . ?
C7 C8 C13 N2 -1.2(3) . . . . ?
C9 C8 C13 N2 178.2(2) . . . . ?
C7 C8 C13 C12 -178.9(2) . . . . ?
C9 C8 C13 C12 0.5(4) . . . . ?
C4 N1 C14 C15 96.4(2) . . . . ?
C24 N1 C14 C15 -143.06(19) . . . . ?
Re1 N1 C14 C15 -19.7(2) . . . . ?
C23 N3 C15 C16 -5.0(3) . . . . ?
Re1 N3 C15 C16 164.55(18) . . . . ?
C23 N3 C15 C14 169.68(19) . . . . ?
Re1 N3 C15 C14 -20.8(2) . . . . ?
N1 C14 C15 N3 28.1(3) . . . . ?
N1 C14 C15 C16 -157.0(2) . . . . ?
N3 C15 C16 C17 0.3(4) . . . . ?
C14 C15 C16 C17 -174.3(2) . . . . ?
C15 C16 C17 C18 2.6(4) . . . . ?
C16 C17 C18 C23 -0.8(4) . . . . ?
C16 C17 C18 C19 176.4(3) . . . . ?
C17 C18 C19 C20 -175.1(3) . . . . ?
C23 C18 C19 C20 2.1(4) . . . . ?
C18 C19 C20 C21 1.3(5) . . . . ?
C19 C20 C21 C22 -2.9(5) . . . . ?
C20 C21 C22 C23 1.2(4) . . . . ?
C15 N3 C23 C22 -170.7(2) . . . . ?
Re1 N3 C23 C22 21.5(3) . . . . ?
C15 N3 C23 C18 6.7(3) . . . . ?
Re1 N3 C23 C18 -161.09(17) . . . . ?
C21 C22 C23 N3 179.6(2) . . . . ?
C21 C22 C23 C18 2.2(4) . . . . ?
C17 C18 C23 N3 -4.0(3) . . . . ?
C19 C18 C23 N3 178.8(2) . . . . ?
C17 C18 C23 C22 173.5(2) . . . . ?
C19 C18 C23 C22 -3.8(4) . . . . ?
C4 N1 C24 C25 59.3(3) . . . . ?
C14 N1 C24 C25 -61.4(2) . . . . ?
Re1 N1 C24 C25 176.09(15) . . . . ?
N1 C24 C25 C26 -178.0(2) . . . . ?
C24 C25 C26 O4 179.1(2) . . . . ?
 
loop_
 _geom_hbond_atom_site_label_D 
 _geom_hbond_atom_site_label_H 
 _geom_hbond_atom_site_label_A 
 _geom_hbond_distance_DH 
 _geom_hbond_distance_HA 
 _geom_hbond_distance_DA 
 _geom_hbond_angle_DHA 
 _geom_hbond_site_symmetry_A 
O4 H4 F5  0.82 2.26 3.067(3) 168.9 3_565
O4 H4 F1  0.82 2.59 3.158(3) 127.5 3_565
 
_refine_diff_density_max    1.027
_refine_diff_density_min   -0.798
_refine_diff_density_rms    0.089

_shelx_res_file
;
TITL MAW160817 IN P2(1)/C
    maw160817.res
    created by SHELXL-2016/6 at 12:10:05 on 17-Aug-2017
CELL  0.71073  17.3858   9.8329  17.3855   90.000  110.109   90.000
ZERR     4.00   0.0004   0.0002   0.0004    0.000    0.002    0.000
LATT   1
SYMM  - X, 1/2 + Y, 1/2 - Z
SFAC  C    H    N    O    F    P    RE
UNIT  104 92 12 16 24 4 4
LIST 6 ! automatically inserted. Change 6 to 4 for CHECKCIF!!
MERG   2
SHEL 100 0.7
EQIV $1 -X, -Y+1, -Z
HTAB O4 F5_$1
HTAB O4 F1_$1
FMAP   2
PLAN   30
SIZE     0.071   0.106   0.119
ACTA
BOND
CONF
L.S.   6
TEMP   160.00
WGHT    0.019100    3.529100
FVAR       0.12014
RE1   7    0.316545    0.018056    0.002303    11.00000    0.01653    0.01957 =
         0.02228    0.00008    0.00426    0.00014
C1    1    0.431669   -0.007457    0.054548    11.00000    0.02346    0.02854 =
         0.02641   -0.00034    0.00683   -0.00131
O1    4    0.501731   -0.013178    0.087809    11.00000    0.01996    0.05029 =
         0.03443    0.00200    0.00433   -0.00005
C2    1    0.331136    0.147355    0.088910    11.00000    0.02383    0.03132 =
         0.03973   -0.00516    0.00585    0.00195
O2    4    0.343943    0.222820    0.142292    11.00000    0.04352    0.05189 =
         0.05562   -0.03115    0.00684   -0.00012
C3    1    0.347130    0.151691   -0.061918    11.00000    0.02227    0.02920 =
         0.04210    0.00638    0.00738    0.00163
O3    4    0.365171    0.231268   -0.101042    11.00000    0.04233    0.04673 =
         0.07767    0.03029    0.02473    0.00032
N1    3    0.182943    0.053105   -0.060732    11.00000    0.01790    0.02001 =
         0.02004    0.00034    0.00435    0.00198
N2    3    0.283908   -0.135031   -0.099199    11.00000    0.02042    0.02095 =
         0.02105    0.00245    0.00689    0.00153
N3    3    0.263120   -0.141487    0.058725    11.00000    0.01907    0.02256 =
         0.01750    0.00207    0.00361    0.00253
C4    1    0.165278    0.011922   -0.147599    11.00000    0.02485    0.02865 =
         0.02020    0.00052    0.00327    0.00678
AFIX  23
H4A   2    0.183124    0.083207   -0.176199    11.00000   -1.20000
H4B   2    0.106684    0.000265   -0.174218    11.00000   -1.20000
AFIX   0
C5    1    0.207970   -0.117754   -0.152836    11.00000    0.02390    0.02722 =
         0.01971    0.00043    0.00677    0.00179
C6    1    0.169196   -0.211102   -0.215629    11.00000    0.02902    0.03625 =
         0.02354   -0.00407    0.00247    0.00253
AFIX  43
H6    2    0.115662   -0.196314   -0.250294    11.00000   -1.20000
AFIX   0
C7    1    0.211041   -0.323265   -0.224969    11.00000    0.03690    0.03072 =
         0.02972   -0.00790    0.00466   -0.00184
AFIX  43
H7    2    0.185970   -0.386673   -0.265544    11.00000   -1.20000
AFIX   0
C8    1    0.292576   -0.342658   -0.172765    11.00000    0.03108    0.02258 =
         0.02926    0.00025    0.01011    0.00073
C9    1    0.339857   -0.454522   -0.183041    11.00000    0.04521    0.02481 =
         0.04175   -0.00717    0.01645    0.00364
AFIX  43
H9    2    0.316178   -0.518532   -0.223684    11.00000   -1.20000
AFIX   0
C10   1    0.419253   -0.468828   -0.134096    11.00000    0.04248    0.02595 =
         0.05450   -0.00097    0.01938    0.00933
AFIX  43
H10   2    0.450086   -0.541375   -0.141925    11.00000   -1.20000
AFIX   0
C11   1    0.454820   -0.373736   -0.071509    11.00000    0.03052    0.03039 =
         0.05605   -0.00086    0.01075    0.00918
AFIX  43
H11   2    0.509437   -0.383406   -0.038553    11.00000   -1.20000
AFIX   0
C12   1    0.410031   -0.266773   -0.058363    11.00000    0.02753    0.02560 =
         0.04216   -0.00270    0.00668    0.00360
AFIX  43
H12   2    0.434066   -0.206654   -0.015518    11.00000   -1.20000
AFIX   0
C13   1    0.327944   -0.247336   -0.109257    11.00000    0.02524    0.01973 =
         0.02822    0.00250    0.01116    0.00175
C14   1    0.134864   -0.033421   -0.023206    11.00000    0.01799    0.02716 =
         0.02731    0.00518    0.00663    0.00290
AFIX  23
H14A  2    0.086728   -0.067206   -0.066299    11.00000   -1.20000
H14B  2    0.116292    0.022447    0.012957    11.00000   -1.20000
AFIX   0
C15   1    0.181903   -0.152067    0.024466    11.00000    0.02150    0.02459 =
         0.01941    0.00102    0.00671    0.00140
C16   1    0.137113   -0.264644    0.036220    11.00000    0.02187    0.03043 =
         0.02992    0.00344    0.00677   -0.00294
AFIX  43
H16   2    0.080532   -0.267737    0.010826    11.00000   -1.20000
AFIX   0
C17   1    0.177317   -0.368840    0.085042    11.00000    0.03252    0.02763 =
         0.03221    0.00438    0.01020   -0.00354
AFIX  43
H17   2    0.148731   -0.445384    0.091546    11.00000   -1.20000
AFIX   0
C18   1    0.262542   -0.359884    0.125646    11.00000    0.03182    0.02616 =
         0.02267    0.00287    0.00856    0.00306
C19   1    0.306403   -0.462220    0.180690    11.00000    0.04550    0.02992 =
         0.03569    0.00998    0.00995    0.00583
AFIX  43
H19   2    0.279437   -0.540635    0.187334    11.00000   -1.20000
AFIX   0
C20   1    0.387348   -0.446859    0.223772    11.00000    0.04833    0.04301 =
         0.03467    0.01536    0.00323    0.01431
AFIX  43
H20   2    0.415854   -0.515356    0.258952    11.00000   -1.20000
AFIX   0
C21   1    0.428021   -0.327933    0.215315    11.00000    0.03099    0.05184 =
         0.03428    0.01067    0.00034    0.00794
AFIX  43
H21   2    0.482908   -0.316458    0.246946    11.00000   -1.20000
AFIX   0
C22   1    0.388154   -0.227865    0.161027    11.00000    0.02451    0.04180 =
         0.02690    0.00762    0.00359    0.00237
AFIX  43
H22   2    0.416367   -0.150255    0.155468    11.00000   -1.20000
AFIX   0
C23   1    0.304416   -0.242740    0.113681    11.00000    0.02346    0.02745 =
         0.01833    0.00350    0.00458    0.00441
C24   1    0.160822    0.201208   -0.057505    11.00000    0.02385    0.02149 =
         0.02742    0.00070    0.00585    0.00422
AFIX  23
H24A  2    0.195437    0.255013   -0.079223    11.00000   -1.20000
H24B  2    0.174019    0.226506   -0.000483    11.00000   -1.20000
AFIX   0
C25   1    0.072040    0.240374   -0.103356    11.00000    0.02328    0.02331 =
         0.02406    0.00103    0.00516    0.00550
AFIX  23
H25A  2    0.056870    0.215956   -0.160718    11.00000   -1.20000
H25B  2    0.036038    0.192700   -0.080479    11.00000   -1.20000
AFIX   0
C26   1    0.064106    0.392976   -0.094762    11.00000    0.02738    0.02652 =
         0.03900   -0.00213    0.00121    0.00739
AFIX  23
H26A  2    0.078724    0.416857   -0.037371    11.00000   -1.20000
H26B  2    0.100995    0.440223   -0.116704    11.00000   -1.20000
AFIX   0
O4    4   -0.017874    0.432480   -0.138062    11.00000    0.02845    0.02904 =
         0.06196    0.00264    0.00171    0.01104
AFIX 147
H4    2   -0.020150    0.515379   -0.143504    11.00000   -1.20000
AFIX   0
P1    6    0.104163    0.188841    0.169069    11.00000    0.02089    0.02005 =
         0.01616    0.00139    0.00475    0.00276
F1    5    0.147265    0.329922    0.169764    11.00000    0.06136    0.04155 =
         0.13269    0.03608    0.01517   -0.00894
F2    5    0.057473    0.203542    0.073324    11.00000    0.05225    0.12125 =
         0.02437    0.00753    0.00783    0.04397
F3    5    0.178286    0.111640    0.152077    11.00000    0.03823    0.08773 =
         0.03294    0.00482    0.01205    0.02904
F4    5    0.152026    0.172531    0.264091    11.00000    0.05674    0.06439 =
         0.02443   -0.00179    0.00516    0.02012
F5    5    0.030143    0.265154    0.184105    11.00000    0.05385    0.06677 =
         0.04468    0.01001    0.02499    0.03090
F6    5    0.061166    0.047343    0.168001    11.00000    0.04142    0.03736 =
         0.11945    0.01140    0.00019   -0.00856
HKLF    4


REM  MAW160817 IN P2(1)/C
REM R1 =  0.0225 for    7691 Fo > 4sig(Fo)  and  0.0275 for all    8524 data
REM    371 parameters refined using      0 restraints

END

WGHT      0.0185      3.6572

REM Highest difference peak  1.027,  deepest hole -0.798,  1-sigma level  0.089
Q1    1   0.3198 -0.0603 -0.0003  11.00000  0.05    0.71
Q2    1   0.3195  0.1034  0.0248  11.00000  0.05    0.67
Q3    1   0.3112  0.0741 -0.0331  11.00000  0.05    0.66
Q4    1   0.0783  0.0585  0.1310  11.00000  0.05    0.55
Q5    1   0.2814 -0.0432 -0.0199  11.00000  0.05    0.55
Q6    1   0.1306  0.3089  0.1206  11.00000  0.05    0.53
Q7    1   0.3771 -0.0379  0.0209  11.00000  0.05    0.50
Q8    1   0.1607 -0.1968  0.0433  11.00000  0.05    0.48
Q9    1   0.1880 -0.1563 -0.1920  11.00000  0.05    0.47
Q10   1   0.3596  0.0795  0.0210  11.00000  0.05    0.43
Q11   1   0.0880  0.0751  0.2156  11.00000  0.05    0.42
Q12   1   0.1603 -0.0859  0.0052  11.00000  0.05    0.40
Q13   1   0.1780  0.1243 -0.0544  11.00000  0.05    0.40
Q14   1   0.0723  0.3170 -0.1044  11.00000  0.05    0.40
Q15   1   0.2829 -0.2828  0.1290  11.00000  0.05    0.39
Q16   1   0.1720  0.2202  0.2407  11.00000  0.05    0.38
Q17   1   0.2863 -0.1925  0.0888  11.00000  0.05    0.38
Q18   1   0.3994 -0.2746  0.1905  11.00000  0.05    0.38
Q19   1   0.3992 -0.3733  0.2336  11.00000  0.05    0.37
Q20   1   0.4177 -0.0264  0.0141  11.00000  0.05    0.37
Q21   1   0.0360  0.1980  0.2014  11.00000  0.05    0.36
Q22   1   0.3006 -0.3032 -0.1379  11.00000  0.05    0.36
Q23   1   0.3468 -0.4373  0.1986  11.00000  0.05    0.36
Q24   1   0.2554 -0.3089 -0.1991  11.00000  0.05    0.36
Q25   1   0.3185 -0.4085 -0.1603  11.00000  0.05    0.36
Q26   1   0.1674  0.0098 -0.0318  11.00000  0.05    0.35
Q27   1   0.3866  0.0166  0.0614  11.00000  0.05    0.35
Q28   1   0.3790  0.1563  0.0314  11.00000  0.05    0.34
Q29   1   0.2795  0.1278 -0.0697  11.00000  0.05    0.34
Q30   1   0.1693  0.0245 -0.0977  11.00000  0.05    0.34
;
_shelx_res_checksum   21343

_shelx_hkl_file
;
   0   0  -2 1067.99 60.6667  15
   0   0   2 1101.13 60.7952   4
   0   0   2 1073.20 60.7004   2
   0   0   2 1055.25 60.7526  10
   0   0  -2 1011.25 60.6179  13
   0   0   3-0.34293 0.67530   4
   0   0  -3 0.06636 0.24661   1
   0   0  -3 0.21377 0.23500  13
   0   0  -3 0.14979 0.16134  16
   0   0  -3 0.24610 0.24223   5
   0   0   3 0.55547 0.49208   2
   0   0  -3 0.13191 0.36604  15
   0   0   3 0.70909 0.65123  10
   0   0   4 39.1439 2.71742  10
   0   0  -4 37.6224 2.33685  16
   0   0   4 39.2396 2.82531   4
   0   0  -4 40.8054 2.49409  15
   0   0  -4 37.5382 2.37246   1
   0   0  -4 39.4175 2.39419  13
   0   0  -4 38.8532 2.40226   5
   0   0   4 41.7832 2.58880   2
   0   0  -5-0.15996 0.36149  13
   0   0  -5 0.38380 0.50129  15
   0   0   5-0.23197 0.38410   8
   0   0  -5-0.27531 0.26769  16
   0   0   5-0.02176 0.27868  16
   0   0   5-0.19752 0.85964  10
   0   0  -5-0.55652 0.38194   1
   0   0   5 0.11409 0.95207   4
   0   0  -5-0.21162 0.36013   5
   0   0  -6 804.685 47.7732  15
   0   0   6 814.294 48.0347  10
   0   0  -6 833.431 47.6268   1
   0   0   6 845.673 47.6533   8
   0   0  -6 828.449 47.6635   5
   0   0   6 793.930 47.5719  16
   0   0   6 824.579 48.1433   4
   0   0  -6 834.824 47.6414  13
   0   0   7 0.41696 1.11740  10
   0   0  -7 0.53816 0.59662  15
   0   0  -7 0.04405 0.45358  13
   0   0  -7 0.45933 0.51706   5
   0   0   7 0.28684 0.47241   8
   0   0   7 0.42552 0.35344  16
   0   0  -7 0.34076 0.79550   2
   0   0  -7 0.50478 0.45539   1
   0   0   7-0.16039 1.18515   4
   0   0   7 0.28430 0.45744  13
   0   0   8 246.027 14.1288  13
   0   0   8 246.546 14.7882   4
   0   0  -8 244.936 14.1056  13
   0   0  -8 255.963 14.1075   1
   0   0  -8 236.294 13.8914  12
   0   0  -8 247.326 14.3050  15
   0   0   8 234.154 14.0190  16
   0   0  -8 241.620 14.1464   5
   0   0   8 230.038 14.1162   8
   0   0   8 245.338 14.6826  10
   0   0   9 0.54105 1.26983  10
   0   0  -9-0.16698 0.51046  13
   0   0  -9 0.21770 0.51701   1
   0   0   9 0.20750 1.36774   4
   0   0  -9-0.08029 0.15816  12
   0   0  -9 0.79173 0.68895  15
   0   0   9 0.39048 0.42932  16
   0   0   9 0.18774 0.50305  13
   0   0  -9 0.96581 0.65127   5
   0   0   9-0.06359 0.56756   8
   0   0  10 265.363 15.4611  10
   0   0  10 267.279 15.6317   4
   0   0  10 270.814 14.7761  13
   0   0 -10 232.187 14.6071   3
   0   0 -10 261.036 14.7326  13
   0   0 -10 272.937 14.9831  15
   0   0  10 246.172 14.6133  16
   0   0  10 232.190 14.7265   8
   0   0 -10 249.321 14.7040   1
   0   0 -10 242.321 14.7735   5
   0   0  11 0.76291 1.21619   2
   0   0 -11 1.32482 1.09448   2
   0   0  11 1.86359 1.19985   7
   0   0 -11 0.24296 0.81644  15
   0   0 -11-0.26162 0.62191   1
   0   0  11 0.70282 0.68274   8
   0   0 -11 0.68474 1.28639  10
   0   0  11 0.47704 0.53121  16
   0   0  11 0.25687 1.54585   4
   0   0 -11 1.40973 0.67275  13
   0   0  11-0.27600 0.78486  15
   0   0  11 0.71680 0.71136  13
   0   0 -11 0.35153 0.70697   5
   0   0  11 1.11352 1.54162  10
   0   0 -11 0.14077 0.50826   3
   0   0 -12 712.800 39.9380   1
   0   0 -12 703.456 40.8820  10
   0   0 -12 704.535 39.8267   3
   0   0 -12 716.696 39.9581  13
   0   0  12 620.135 39.9612   8
   0   0  12 660.991 40.7587  10
   0   0  12 701.198 40.4475   2
   0   0 -12 678.511 40.6167   2
   0   0  12 690.809 39.8387  16
   0   0  12 675.297 40.9868   4
   0   0  12 668.946 40.4829   7
   0   0  12 669.583 40.3085  15
   0   0 -12 693.816 40.2639  15
   0   0  12 660.953 39.9990  13
   0   0  13 0.33543 1.00163  15
   0   0 -13 1.15842 1.07008  15
   0   0 -13 0.62773 0.73878  13
   0   0  13-0.49141 0.91643  13
   0   0 -13 0.29730 0.69541   1
   0   0  13 1.23331 1.88371   4
   0   0  13 2.43472 1.37974   7
   0   0  13 0.22551 0.65224  16
   0   0 -13 1.10381 1.44184  10
   0   0  13 0.26573 1.65941  10
   0   0  13 0.54245 1.37639   2
   0   0  13 0.45355 0.83770   8
   0   0 -13 0.20377 0.51901   3
   0   0 -13-0.23049 1.35469   2
   0   0  14 246.600 14.5698   2
   0   0  14 209.591 13.9465   8
   0   0  14 230.324 15.2236   4
   0   0  14 217.163 14.0313  13
   0   0 -14 235.269 13.7745   3
   0   0 -14 233.214 14.7888   2
   0   0 -14 255.548 14.3790  15
   0   0  14 220.640 14.5785   7
   0   0  14 238.450 14.4389  15
   0   0  14 249.275 15.0870  10
   0   0 -14 241.660 13.9544  13
   0   0  14 236.491 13.8240  16
   0   0 -14 241.191 15.1112  10
   0   0 -14 239.730 13.9103   1
   0   0 -15 0.65057 1.84895  10
   0   0  15 0.84196 1.64769   2
   0   0  15-0.06512 0.77773  16
   0   0 -15 0.64087 0.63290   3
   0   0 -15 2.46562 1.77076   2
   0   0  15 0.19351 0.90492   8
   0   0 -15 0.15673 0.77605   1
   0   0  15-1.08464 2.28966   4
   0   0  15-0.11801 1.02340  13
   0   0  15 0.93374 2.12906  10
   0   0  15 0.94900 1.72589   7
   0   0 -15-0.50691 1.18978  15
   0   0  15 0.79323 1.21154  15
   0   0 -15-0.17819 0.80085  13
   0   0 -16 130.533 8.96329   2
   0   0 -16 127.085 9.17603  10
   0   0  16 128.445 7.92072   8
   0   0 -16 145.179 7.98072  13
   0   0 -16 122.640 7.67849   3
   0   0  16 126.180 8.48851  15
   0   0  16 119.579 8.07043  13
   0   0  16 129.083 7.78684  16
   0   0  16 140.309 8.76587   2
   0   0  16 120.022 8.71755   7
   0   0 -16 125.943 8.14814   5
   0   0 -16 129.398 7.82112   1
   0   0 -17-0.37716 2.16236  10
   0   0  17-0.55159 1.25663  13
   0   0  17 3.56259 2.10596   7
   0   0 -17 2.23229 2.16852   2
   0   0  17 0.23128 1.46495  15
   0   0 -17 2.06375 1.40923   5
   0   0  17 0.64521 0.93867   8
   0   0 -17 0.70273 1.03319  13
   0   0  17 1.32406 0.87547  16
   0   0 -17-0.51551 0.76218   1
   0   0 -18 214.690 14.5480   2
   0   0  18 207.404 13.2580   8
   0   0  18 216.169 14.0747  15
   0   0  18 219.298 13.2329  16
   0   0 -18 231.730 13.6975   5
   0   0  18 218.255 14.3554   7
   0   0 -18 221.136 14.8475  10
   0   0 -18 249.323 13.4592  13
   0   0  19 1.33120 1.75495  15
   0   0  19-2.16898 2.13209   7
   0   0 -19-0.36658 2.38512   2
   0   0 -19 0.49912 1.46925   5
   0   0 -19-1.72159 2.70667  10
   0   0  20 57.1137 5.11686  14
   0   0 -20 68.6191 6.07483  10
   0   0 -20 64.8559 5.69175   2
   0   0  20 67.6878 5.47688   7
   0   0  20 50.7334 4.92873  15
   0   0  21-1.36664 2.17865  14
   0   0 -21 2.07842 2.65068   2
   0   0 -21 1.46202 2.97715  10
   0   0  21-0.68720 2.37814   7
   0   0  22 44.5520 4.81369   7
   0   0 -22 55.4138 5.59204   2
   0   0 -22 47.4149 5.55446  10
   0   0  22 52.5015 4.84539  14
   0   0 -23 1.63348 3.27635  10
   0   0 -23-1.85295 3.24330   2
   0   1   0 0.02895 0.30633   8
   0   1   0-0.09699 0.19973   1
   0   1  -1 2310.45 128.727   1
   0   1   1 2262.84 128.757   2
   0   1   1 2089.23 128.724   3
   0   1   1 2392.57 128.732   5
   0  -1   1 2403.06 128.697  16
   0   1   1 2158.00 128.729   9
   0   1  -1 2071.57 128.782   8
   0   1  -1 2116.58 128.695  15
   0   1  -1 2371.24 128.850   7
   0  -1   1 2334.55 128.756  10
   0   1  -1 2162.92 128.765   9
   0   1   1 2083.48 128.724   8
   0   1  -2 71.3754 4.72036   9
   0   1  -2 78.6501 4.67607  13
   0   1  -2 79.3176 4.85058   7
   0   1   2 74.3463 4.76837  10
   0   1  -2 75.4071 4.67503  15
   0   1   2 73.1833 4.81898   4
   0  -1   2 79.7744 4.77299   4
   0  -1   2 83.2700 4.78879  10
   0  -1  -2 82.1496 4.66791   3
   0   1  -2 83.7135 4.69209   1
   0  -1  -2 81.7101 4.59988  13
   0  -1   2 76.4073 4.63531  16
   0   1  -2 82.5566 4.76042   8
   0  -1  -2 76.0297 4.63762   9
   0   1   3 1700.00 97.7177   4
   0  -1   3 1677.35 97.6373  10
   0   1  -3 1851.94 97.5031  13
   0   1  -3 1595.43 97.5201   9
   0  -1  -3 1592.68 97.4822   5
   0  -1  -3 1806.60 97.5053  15
   0  -1  -3 1715.58 97.4113  13
   0   1  -3 1565.64 97.5097   1
   0  -1  -3 1714.49 97.4601   3
   0  -1   3 1642.35 97.6535   4
   0   1   3 1615.03 97.6368  10
   0   1  -3 1553.18 97.5058  15
   0   1  -3 1826.80 97.5679   8
   0  -1  -4 371.559 22.6718   2
   0  -1  -4 393.621 22.4484  13
   0   1  -4 368.263 22.7471  10
   0   1   4 403.656 22.8699   4
   0   1  -4 392.715 22.5377  13
   0   1  -4 386.585 22.5603   9
   0  -1   4 395.176 22.7643  10
   0  -1  -4 395.511 22.5349   5
   0   1  -4 369.084 22.5523   1
   0  -1  -4 389.822 22.4798   3
   0   1   4 372.225 22.4474   3
   0  -1   4 373.953 22.7834   4
   0   1   4 351.008 22.7253  10
   0  -1  -4 397.683 22.5671  15
   0   1  -4 411.462 22.6022   8
   0   1  -4 380.410 22.5847  15
   0   1  -4 404.025 22.4825  16
   0  -1   5 663.793 37.3569   4
   0  -1  -5 667.095 37.0477  15
   0   1  -5 568.409 37.2334  10
   0  -1  -5 612.627 36.9077   3
   0   1   5 646.933 37.3974   4
   0  -1  -5 673.243 37.1962   2
   0   1  -5 650.531 36.9265  16
   0   1  -5 629.492 36.9975   9
   0   1   5 584.262 37.2469  10
   0  -1  -5 641.864 36.9007  13
   0  -1  -5 624.206 36.9797   5
   0   1  -5 667.587 37.0498   8
   0   1  -5 650.964 37.0654  15
   0  -1   5 628.167 37.2614  10
   0   1   5 583.193 36.9432   5
   0  -1   5 685.584 37.1727   2
   0  -1   5 655.699 36.9704   9
   0   1  -5 618.267 37.0089   1
   0   1  -5 697.589 36.9928  13
   0   1   5 625.743 36.8813   3
   0   1  -6-0.37071 0.93600  10
   0  -1  -6-0.12797 0.54662  15
   0  -1   6 1.18237 0.98267  10
   0  -1  -6-0.18031 0.31410  13
   0   1  -6 0.40294 0.29978  16
   0   1   6-0.71747 1.07097   4
   0   1   6 0.97675 1.07048  10
   0  -1  -6-0.30375 0.35492   3
   0  -1   6 0.29534 0.40843  16
   0   1  -6 0.46726 0.46402  13
   0  -1  -6-0.09770 0.72552   2
   0  -1   6 0.91898 0.99442   4
   0  -1  -6 0.19677 0.46736   5
   0   1  -6 0.40791 0.58959  15
   0   1   6 0.12090 0.41027   5
   0   1  -6 0.22038 0.53460   8
   0   1  -6-0.09414 0.46876   9
   0  -1   6 0.47776 0.64033   8
   0  -1   6 0.43552 0.76924   2
   0   1   6 0.24404 0.36435  13
   0   1  -6 0.16310 0.45912   1
   0   1  -7 811.544 43.2796   8
   0   1   7 798.286 43.8628   4
   0   1   7 741.911 43.1689  13
   0  -1   7 725.304 43.6517  10
   0   1   7 696.457 43.6371  10
   0  -1   7 747.370 43.1453  16
   0   1   7 761.120 43.1100   8
   0  -1  -7 802.468 43.3593  15
   0  -1  -7 728.394 43.5267   2
   0  -1  -7 714.165 43.2349   5
   0   1  -7 728.493 43.1975   9
   0  -1  -7 722.126 43.0470   1
   0   1  -7 738.104 43.1489  16
   0   1  -7 726.671 43.2682   1
   0   1   7 740.929 43.1865   5
   0  -1   7 786.097 43.7675   4
   0  -1  -7 775.999 43.1442  13
   0   1  -7 739.081 43.3539  15
   0   1  -7 641.939 43.5848  10
   0   1   7 739.118 43.1043  16
   0  -1   7 729.735 43.3308   8
   0  -1  -7 734.057 43.1228   3
   0   1  -7 802.557 43.2473  13
   0  -1   7 733.393 43.4528   2
   0  -1  -8 47.7849 2.89860   3
   0   1  -8 47.4613 3.17963  15
   0   1   8 46.2583 3.71227   4
   0   1  -8 50.2575 3.07161   8
   0  -1   8 40.2099 3.02331  13
   0  -1  -8 48.0112 3.39912   2
   0   1  -8 47.3114 2.93380  16
   0  -1  -8 50.7245 3.18265  15
   0   1  -8 46.5588 2.96853   9
   0  -1   8 47.5317 3.61100  10
   0  -1   8 44.3001 3.15388   8
   0  -1  -8 48.5449 2.93572  13
   0  -1  -8 45.5333 3.05361   5
   0   1   8 46.3014 2.89432   8
   0   1   8 44.2197 2.95401  13
   0   1   8 47.6691 2.87717  16
   0   1   8 37.9214 3.52075  10
   0  -1   8 48.6620 3.52059   7
   0   1  -8 49.1640 3.04838  13
   0  -1   8 47.7284 2.93823  16
   0   1  -8 47.0510 3.09013   1
   0  -1  -8 45.2128 2.81744   1
   0  -1   8 50.7837 3.74702   4
   0   1  -9 215.335 12.9725  15
   0  -1   9 211.455 13.2656   7
   0   1   9 210.809 12.6523  16
   0   1   9 214.447 12.6786   8
   0  -1  -9 223.849 12.6088   1
   0  -1  -9 218.074 12.6701   3
   0  -1  -9 221.133 12.9741  15
   0   1  -9 225.469 12.8215  13
   0   1  -9 215.223 12.8616   1
   0   1  -9 210.478 12.7190   9
   0  -1  -9 195.027 12.8115   5
   0   1  -9 230.138 12.8594   5
   0  -1   9 220.014 12.7051  16
   0   1   9 211.364 13.3967  10
   0   1   9 213.049 13.1290   2
   0  -1  -9 221.818 12.7157  13
   0   1   9 212.443 12.7461  13
   0   1  -9 211.193 12.7062  16
   0  -1   9 204.736 12.8434  13
   0  -1   9 223.138 13.4143  10
   0  -1   9 219.764 13.5395   4
   0   1   9 229.843 13.6251   4
   0  -1   9 211.710 12.9212   8
   0  -1 -10 90.7029 5.26109   1
   0   1  10 85.7871 6.37078   4
   0  -1 -10 92.7719 5.69760  15
   0  -1 -10 88.5949 5.32478   3
   0   1 -10 91.9445 5.56704   1
   0  -1  10 80.4462 5.52399  13
   0   1  10 95.2711 6.24777  10
   0   1  10 88.2652 5.42339  13
   0   1  10 87.0659 5.85715   2
   0   1 -10 92.0285 5.70167  15
   0  -1  10 87.1014 6.01231   7
   0  -1 -10 89.4002 5.54527   5
   0   1 -10 88.4068 5.49203  13
   0  -1 -10 90.3329 5.39048  13
   0  -1  10 89.0860 6.19312  10
   0  -1  10 85.4192 5.35865  16
   0  -1  10 86.1833 6.28130   4
   0   1 -10 86.1160 5.51326   5
   0  -1  10 80.2863 5.58248   8
   0   1  10 91.0066 5.31680  16
   0   1 -10 89.9663 5.34518   9
   0   1  10 85.0447 5.34185   8
   0   1 -10 87.4603 5.37718  16
   0   1  11 450.676 26.7499   4
   0   1  11 421.027 26.4796  10
   0   1 -11 458.499 25.5940   9
   0   1 -11 444.739 25.6668  16
   0  -1  11 442.407 26.3553   7
   0  -1  11 443.173 26.0835  15
   0  -1 -11 432.898 25.8283   5
   0  -1  11 405.359 25.8181  13
   0  -1 -11 450.568 25.5409   1
   0  -1  11 454.622 26.5324  10
   0   1  11 435.075 25.5970  16
   0   1  11 460.108 25.7407  13
   0  -1 -11 438.917 26.3064   2
   0   1 -11 435.085 26.0050  15
   0  -1 -11 441.330 25.6002   3
   0   1 -11 441.296 26.3301   2
   0  -1 -11 458.123 25.6776  13
   0   1 -11 442.892 25.8454   1
   0  -1  11 429.229 25.8985   8
   0  -1 -11 453.685 26.5255  10
   0  -1 -11 449.721 25.9996  15
   0   1  11 375.072 25.6216   8
   0   1  11 468.467 26.2026   2
   0   1 -11 460.883 25.7830  13
   0  -1  11 423.226 26.6045   4
   0  -1  11 431.583 25.6414  16
   0  -1  12 0.54950 1.69141   4
   0  -1  12 1.29623 0.71018  16
   0  -1 -12 0.44561 0.69617  13
   0  -1 -12 0.51008 0.41275   1
   0  -1 -12 3.01638 1.58127  10
   0   1  12 1.08223 0.67647  13
   0   1 -12-0.09675 0.81148   1
   0   1 -12 0.81053 0.94124  15
   0   1  12-0.29014 0.59873  16
   0   1  12 2.48801 1.93905  10
   0   1  12 0.57987 1.86187   4
   0  -1  12 2.10888 1.43447   7
   0  -1 -12 1.23942 1.29050   2
   0  -1 -12 2.61960 1.03069  15
   0  -1  12 1.23851 0.84475  13
   0   1 -12 1.06469 0.43787   9
   0   1  12 1.00787 1.23538   2
   0  -1  12 1.20202 1.78567  10
   0  -1 -12-0.14291 0.52163   3
   0   1  12 0.11851 0.60449   8
   0  -1  12 1.01864 0.86650   8
   0   1 -12 0.21379 1.25702   2
   0  -1  12 0.78201 0.99128  15
   0   1 -12 1.84593 0.83174  13
   0  -1 -13 396.143 23.8813   1
   0  -1  13 402.283 24.8838   7
   0   1  13 407.014 23.9789  16
   0  -1 -13 404.204 25.0591  10
   0  -1  13 410.862 25.0680  10
   0  -1 -13 393.720 23.9527   3
   0   1 -13 514.010 23.8706  11
   0   1  13 410.282 24.1579  13
   0  -1 -13 419.495 24.0736  13
   0   1 -13 412.007 23.8567   9
   0  -1  13 364.910 24.2575   8
   0   1  13 387.713 24.0172   8
   0   1  13 405.337 25.3323   4
   0  -1 -13 409.586 24.8321   2
   0  -1 -13 432.023 24.4703  15
   0  -1  13 410.029 25.2611   4
   0  -1  13 413.166 24.5777  15
   0   1  13 357.386 24.9414  10
   0   1 -13 426.451 24.4781  15
   0  -1  13 393.754 24.0267  16
   0   1 -13 379.431 23.8227  12
   0   1 -13 389.082 24.8510   2
   0   1 -13 431.903 24.2640   1
   0  -1  13 368.224 24.2323  13
   0  -1  13 427.110 24.6995   2
   0   1  13 420.077 24.6660   2
   0   1 -13 421.498 24.1849  13
   0   1 -14 10.3609 1.34109   1
   0   1 -14 8.92651 0.69104  12
   0   1 -14 8.88007 1.48950  15
   0  -1  14 9.31929 1.60117  15
   0  -1  14 7.41354 1.99334   7
   0  -1 -14 9.25015 0.89966   3
   0  -1 -14 8.32056 0.78329   1
   0  -1  14 10.2318 2.38728  10
   0  -1 -14 9.21707 1.10423  13
   0  -1  14 12.0605 2.62088   4
   0  -1  14 7.27656 1.28192  13
   0  -1 -14 11.6502 2.12714  10
   0  -1  14 9.36485 1.46317   8
   0   1  14 8.11008 1.77004   7
   0   1  14 8.44410 1.03836  16
   0   1 -14 10.3663 1.25674  13
   0   1  14 9.62687 1.23671  13
   0   1  14 9.33091 1.04222   8
   0   1  14 10.8355 2.02601   2
   0   1 -14 8.76127 2.07226   2
   0   1  14 15.7956 2.90582   4
   0  -1 -14 8.16078 1.88943   2
   0  -1 -14 9.59743 1.55627  15
   0   1 -14 13.0053 0.76725  11
   0  -1  14 7.12449 1.03892  16
   0  -1 -15 195.863 10.6525   3
   0  -1  15 179.161 11.4365  15
   0   1  15 202.377 11.6636   2
   0  -1  15 201.549 12.4522   4
   0  -1  15 197.778 12.1691  10
   0   1  15 182.225 11.5660   7
   0  -1 -15 205.856 10.9073  13
   0   1  15 191.156 10.7627  16
   0  -1  15 197.574 11.9187   7
   0  -1  15 177.287 11.1001   8
   0   1  15 171.678 10.7523   8
   0   1 -15 185.567 10.8026   3
   0  -1  15 193.644 10.8347  16
   0   1 -15 172.091 11.8169   2
   0   1 -15 167.517 10.4805  12
   0   1  15 187.223 11.0090  13
   0  -1 -15 193.593 11.8899   2
   0   1  15 176.078 12.3489   4
   0   1 -15 181.392 11.3333  15
   0   1 -15 198.979 11.0754   1
   0  -1 -15 175.713 10.5555   1
   0  -1 -15 194.826 12.2044  10
   0   1 -15 182.513 11.1226   5
   0   1 -15 205.839 11.0374  13
   0   1  16-0.19157 0.78217  16
   0   1 -16-0.30431 1.84532   2
   0  -1 -16 0.69975 1.79038  10
   0   1  16 0.57997 1.05355  13
   0  -1 -16 0.87140 1.74801   2
   0  -1  16 0.53774 0.80927  16
   0   1 -16-0.69300 1.07703   1
   0  -1  16 1.16885 1.17952   8
   0   1 -16 0.10587 1.01532  13
   0  -1  16 1.13796 2.41897   4
   0   1 -16-1.25295 1.16200   5
   0   1  16 2.98964 1.85674   7
   0   1  16 0.82432 0.71050   8
   0  -1 -16 1.76934 1.22349   5
   0  -1  16 0.21855 1.33542  15
   0  -1 -16 1.20979 0.82388  13
   0   1 -16 0.47739 0.70400   3
   0  -1  16 1.14500 1.98140   7
   0   1  16 1.58061 1.87681   2
   0  -1  17 122.806 8.27647  15
   0   1  17 113.967 7.38230  16
   0   1  17 117.790 7.69632  13
   0   1 -17 127.645 7.66674  13
   0  -1 -17 130.851 8.76257   2
   0  -1  17 113.876 8.59588   7
   0  -1  17 120.819 7.46937  16
   0  -1  17 108.595 7.67940   8
   0   1 -17 117.953 7.65463   1
   0   1 -17 125.831 7.86361   5
   0  -1 -17 128.471 7.56649  13
   0  -1 -17 128.716 7.84027   5
   0   1 -17 131.671 8.86891   2
   0   1  17 112.536 8.29496   7
   0   1 -17 131.924 7.41416   3
   0  -1 -17 113.572 8.90674  10
   0  -1  18 2.21447 1.01373  16
   0   1 -18 1.40391 1.30147  13
   0  -1 -18 2.69031 2.48486   2
   0  -1  18-0.75651 1.59735  15
   0   1  18 1.05071 2.12086   7
   0   1  18-1.22128 1.22843  13
   0  -1  18 0.32390 2.18933   7
   0  -1 -18 1.08735 1.41559   5
   0  -1 -18 0.49018 1.00388  13
   0   1  18 0.35690 0.85146  16
   0   1 -18 2.46185 2.08368   2
   0  -1 -18-0.80141 2.29741  10
   0   1 -18 0.32246 1.37245   5
   0  -1  19 152.313 11.0787   7
   0   1  19 153.662 10.8594  14
   0  -1  19 161.196 10.7432  15
   0  -1  19 155.104 9.93616   8
   0   1  19 166.492 10.8333   7
   0   1 -19 164.300 11.3404   2
   0   1 -19 165.534 10.2715   5
   0  -1 -19 175.842 10.2872   5
   0  -1 -19 149.829 11.1210   2
   0  -1 -19 165.219 11.6203  10
   0   1 -20 0.54297 1.64119   5
   0  -1 -20 3.65350 2.95368  10
   0   1  20 1.18763 2.36834   7
   0   1 -20 2.00333 2.82305   2
   0   1  20 3.55438 2.15961  14
   0  -1 -20-0.38222 2.69328   2
   0  -1  20 0.95598 1.90557  14
   0  -1  20 3.77081 1.84000  15
   0   1  21 64.2760 5.39854  14
   0  -1  21 56.7591 5.15511  15
   0   1 -21 67.9952 6.06410   2
   0  -1 -21 67.9506 6.32336  10
   0  -1  21 57.5123 5.68202   7
   0  -1  21 57.2646 5.27047  14
   0   1  22 4.37494 2.34511  14
   0  -1 -22 5.65361 3.32510  10
   0  -1  22 0.78683 2.54689   7
   0   1  22-0.31918 2.20095  15
   0   1  22 5.18314 2.52829   7
   0  -1  22-0.35963 2.23421  14
   0  -1  22 2.97738 1.98048  15
   0   1 -22 7.21447 3.05077   2
   0  -1 -22 0.42707 2.85449   2
   0  -1 -23 23.3621 4.42250  10
   0   1  23 23.0485 3.35332  15
   0  -1  23 25.1828 3.91031   7
   0  -1  23 23.5885 3.46076  15
   0   1 -23 17.6210 4.15359   2
   0  -1  23 28.1505 3.72768  14
   0  -1 -23 29.6641 4.48129   2
   0  -1 -24 4.23299 3.33907   2
   0  -2   0 182.258 9.76824   6
   0   2   0 163.798 9.68071   3
   0   2   0 162.339 9.70446   9
   0   2   0 153.062 9.59551   1
   0   2   0 165.000 9.72899   8
   0   2  -1 216.254 11.9620   8
   0  -2   1 202.946 11.7588  16
   0  -2   1 208.745 11.7612  15
   0  -2  -1 211.775 11.9037   7
   0  -2  -1 209.081 11.8586   6
   0   2  -1 190.974 12.0326   7
   0   2  -1 192.763 11.9103   9
   0  -2  -1 210.694 11.7699  17
   0   2  -1 165.343 11.8088   1
   0   2  -2 1078.38 62.7359   8
   0  -2   2 1132.77 62.6871  10
   0  -2  -2 1138.64 62.6397   9
   0  -2  -2 1147.40 62.6072   7
   0   2  -2 990.264 62.6952   9
   0  -2  -2 1048.36 62.6424   8
   0  -2  -2 1125.74 62.6314   5
   0  -2   2 1023.52 62.5879   4
   0   2  -2 904.211 62.8291   7
   0  -2   2 1031.17 62.5780  15
   0  -2  -2 1147.61 62.6479   3
   0  -2  -2 1172.53 62.5797   6
   0  -2   2 1019.71 62.5475  16
   0   2  -2 1111.90 62.6380   1
   0   2  -3-0.06396 0.78441   9
   0   2  -3-0.30442 0.55012   1
   0  -2  -3 0.18917 0.61005   2
   0  -2  -3 0.32048 0.47356   3
   0   2  -3 0.44099 0.50571  13
   0  -2   3 0.49706 0.42669  15
   0  -2   3-0.15759 0.76003   8
   0  -2   3-0.47921 0.81914  10
   0  -2   3 0.05995 0.68153   4
   0   2  -3 0.58009 0.94085   7
   0  -2  -3 0.51310 0.46846   5
   0   2   3-0.06059 0.30572   1
   0   2  -3 1.07086 0.78494   8
   0  -2  -3 0.11983 0.44629   9
   0   2   4 995.972 57.8093   8
   0   2   4 1018.46 57.8478   3
   0   2  -4 1091.41 57.8173  16
   0  -2  -4 1053.78 57.8069   9
   0   2   4 896.839 57.8486   5
   0   2  -4 996.702 57.9667   9
   0  -2   4 1081.64 57.9162  15
   0  -2  -4 1024.05 57.8516   3
   0   2   4 972.036 57.7225  13
   0  -2  -4 1020.72 58.0062   2
   0  -2  -4 906.236 57.8792   5
   0  -2   4 976.345 58.0196   4
   0  -2  -4 993.315 58.0579  10
   0  -2   4 1065.88 58.0735  10
   0   2  -4 976.563 57.8562  13
   0   2  -4 1069.70 58.1923   7
   0   2   4 936.715 57.8110   9
   0   2  -4 981.530 57.9077   1
   0   2  -4 992.507 57.9945   8
   0   2  -5 88.5678 5.16143  16
   0   2  -5 72.7355 5.26280   1
   0  -2  -5 81.4990 5.07055  13
   0  -2   5 82.1038 5.49798   4
   0   2   5 82.2179 5.08281  13
   0   2   5 80.3115 5.12212   9
   0  -2  -5 81.4948 5.24010   5
   0   2   5 104.394 5.05561  11
   0  -2  -5 82.3661 5.18648   3
   0   2   5 85.8256 5.21897   5
   0   2   5 81.9232 5.13168   8
   0   2   5 83.6095 5.17046   3
   0  -2  -5 89.7490 5.51152  10
   0  -2   5 84.8157 5.50590  10
   0  -2  -5 76.8639 5.38139   2
   0   2  -5 82.3791 5.32723   9
   0  -2   5 83.0260 5.27753   9
   0  -2   5 85.9610 5.29563  15
   0   2  -5 91.7791 5.23318  13
   0   2  -5 92.5451 5.40002   8
   0  -2   6 981.109 55.8161  15
   0   2   6 1046.30 55.4762  11
   0   2   6 866.306 55.8792   2
   0  -2   6 911.230 55.6096  16
   0   2  -6 1060.55 55.7193  13
   0   2   6 912.527 55.5332   9
   0   2   6 959.229 55.6754   5
   0  -2  -6 963.229 56.0274  10
   0  -2   6 1037.23 55.7571   9
   0   2   6 935.974 55.5931   3
   0   2   6 976.557 55.5843   8
   0   2   6 952.226 55.5611  13
   0  -2   6 941.898 56.0384   4
   0  -2  -6 955.547 55.5442  13
   0   2  -6 839.166 56.0262   4
   0   2  -6 978.642 55.6308  16
   0  -2  -6 973.306 55.6462   3
   0  -2  -6 881.260 55.8922   2
   0   2  -6 915.196 55.7653   1
   0   2  -6 910.930 55.7605   9
   0  -2   6 875.973 55.8639   8
   0  -2   6 945.891 56.0080  10
   0  -2  -6 888.231 55.7047   5
   0   2  -6 969.802 55.8197   8
   0  -2  -7 52.5950 3.51358   5
   0  -2  -7 52.2473 3.75659   2
   0  -2   7 47.7320 3.66250   8
   0   2   7 52.1403 3.33099  13
   0  -2  -7 52.0017 3.31071  13
   0   2  -7 52.0728 3.56123   9
   0  -2  -7 53.1332 3.39661   3
   0   2  -7 57.1052 3.62245   8
   0  -2   7 55.0921 3.39669  16
   0   2   7 56.3991 3.34244   3
   0  -2   7 50.2363 3.88819  10
   0   2   7 51.8363 3.78386   2
   0   2   7 53.2915 3.44765   5
   0   2  -7 61.0771 3.52007  13
   0  -2  -7 56.1565 3.54323  15
   0   2  -7 53.3195 3.58370   1
   0  -2   7 59.7136 3.52651   9
   0   2  -7 55.6521 3.40839  16
   0  -2   7 53.0404 3.97581   4
   0   2  -7 51.7503 3.97996   4
   0  -2  -7 53.5956 3.90892  10
   0   2   7 55.9720 3.23308   9
   0  -2   7 53.7941 3.63958  15
   0  -2   8 629.246 36.7389  10
   0  -2  -8 601.177 36.5918   2
   0  -2  -8 613.937 36.1776   3
   0   2   8 643.841 36.5903   2
   0  -2  -8 623.270 36.1181  13
   0   2   8 631.083 36.2315   5
   0  -2   8 623.157 36.1822  16
   0   2  -8 642.597 36.2936  13
   0   2   8 640.584 36.1585  13
   0   2   8 604.515 36.1104   3
   0  -2  -8 582.493 36.2947   5
   0   2  -8 628.319 36.3830   8
   0   2  -8 620.100 36.3729   1
   0   2  -8 608.904 36.3288   9
   0  -2  -8 675.033 36.3840  15
   0   2  -8 643.756 36.1993  16
   0   2  -8 590.861 36.8479   4
   0  -2   8 595.479 36.7637   4
   0  -2   8 593.297 36.4803   8
   0  -2   9 11.8115 1.44169   8
   0   2   9 11.2697 1.51343   2
   0   2  -9 12.3701 1.19835   9
   0   2  -9 9.09268 0.93582  16
   0  -2  -9 10.5173 0.89260  13
   0  -2  -9 9.03650 0.92013   3
   0   2  -9 7.73711 1.17732   1
   0  -2  -9 11.4483 1.22058  15
   0   2  -9 11.2042 1.21887   8
   0  -2   9 10.3547 1.81641   4
   0  -2  -9 8.68157 1.09983   5
   0  -2   9 10.7164 0.99589  16
   0  -2   9 9.76578 1.65338   7
   0   2   9 10.4411 1.03917   5
   0  -2   9 10.2989 1.77102  10
   0   2   9 10.1194 0.93679  13
   0   2  -9 10.8443 1.12958  13
   0   2  10 367.137 21.7093  13
   0   2  10 383.044 22.2170   2
   0  -2  10 370.596 22.0734   8
   0   2  10 372.516 21.6362  16
   0   2 -10 407.356 21.9438   8
   0   2 -10 366.983 21.9490   1
   0   2  10 371.088 21.5930   8
   0  -2  10 371.466 22.4176  10
   0  -2  10 374.486 22.4689   7
   0   2 -10 360.346 21.8177   9
   0   2 -10 397.701 21.8658  13
   0  -2  10 365.091 21.7123  16
   0  -2 -10 388.567 21.9825  15
   0  -2 -10 340.997 21.8480   5
   0  -2 -10 362.937 21.6568  13
   0  -2  10 356.553 22.4902   4
   0   2  10 369.841 21.7537   5
   0  -2 -10 370.479 21.6764   3
   0   2  11 0.96289 0.61031  13
   0   2  11 0.79359 0.43493   8
   0  -2  11 1.02391 0.90717  15
   0   2 -11-0.58918 1.16368   2
   0  -2 -11 0.21293 0.53658  13
   0   2 -11 0.07807 0.70693   9
   0  -2  11 0.24278 1.55892   4
   0  -2 -11 0.30166 0.53258   3
   0  -2 -11 1.60674 1.43349  10
   0  -2  11 1.01133 0.65415  16
   0   2  11 0.16173 1.24296   2
   0  -2 -11 0.18758 1.22071   2
   0   2  11 0.13508 0.52122  16
   0  -2  11 0.67498 1.46410   7
   0   2 -11 0.56116 0.90639   1
   0   2 -11 0.88613 0.79677  13
   0  -2  11 0.68609 1.07439   8
   0  -2  11-0.43622 1.52723  10
   0  -2 -11-0.78964 0.80062   5
   0   2  12 257.057 15.5324   8
   0  -2  12 273.465 16.1615  15
   0  -2 -12 247.551 16.3463   2
   0  -2  12 260.659 16.6998   4
   0  -2 -12 278.526 15.5913   3
   0   2 -12 278.236 16.4880   2
   0   2 -12 278.411 15.8481  13
   0   2 -12 285.831 15.7406   9
   0  -2  12 251.735 16.0381   8
   0   2  12 272.739 15.5880  16
   0   2  12 222.499 15.9723  15
   0  -2  12 251.468 15.6699  16
   0   2 -12 274.458 15.9665   1
   0   2  12 270.438 15.7049  13
   0  -2 -12 247.196 16.5255  10
   0  -2 -12 266.190 15.6331  13
   0  -2  12 256.072 16.5579   7
   0   2  12 276.072 16.2547   2
   0  -2  12 266.376 16.5759  10
   0   2  13 18.0232 1.41683   8
   0  -2  13 23.5350 2.18379  15
   0  -2 -13 20.6847 1.58923  13
   0   2 -13 22.0199 1.94561   5
   0  -2  13 22.2778 2.14317   8
   0   2 -13 17.0367 2.38985   2
   0   2  13 20.6679 2.36581   2
   0   2  13 15.3549 1.99951  15
   0   2  13 20.2672 1.52539  16
   0   2 -13 22.7226 1.65209   9
   0   2  13 18.7380 1.67215  13
   0  -2  13 21.0269 2.93566   4
   0  -2  13 19.2859 2.77593  10
   0   2 -13 25.7403 1.92373  13
   0  -2 -13 15.1133 2.46176  10
   0  -2  13 21.6915 2.62032   7
   0  -2 -13 20.7771 1.46059   3
   0  -2 -13 19.4171 2.43335   2
   0   2 -13 22.3735 2.02015   1
   0  -2  13 18.1740 1.60619  16
   0   2  14 345.094 19.7179  16
   0  -2  14 328.048 19.8133  16
   0  -2 -14 334.571 19.7822  13
   0   2  14 295.817 20.2477  15
   0   2 -14 349.620 20.0780   5
   0  -2  14 350.015 20.9617  10
   0   2 -14 359.148 19.7694   9
   0   2 -14 356.370 20.0105  13
   0  -2 -14 340.709 19.6175   3
   0   2  14 350.824 19.8861  13
   0   2 -14 362.672 20.1659   1
   0  -2  14 320.631 20.1926   8
   0   2  14 302.345 19.6108   8
   0  -2 -14 320.939 20.8687  10
   0  -2 -14 331.332 20.6603   2
   0   2 -14 347.378 20.8168   2
   0  -2  14 342.363 20.4076  15
   0  -2  14 330.870 21.0560   4
   0  -2  14 322.800 20.7871   7
   0   2  14 360.895 20.5524   2
   0   2 -14 349.891 19.8615  16
   0  -2  15 20.4857 2.37684  15
   0   2 -15 21.4880 1.56473   9
   0   2  15 20.4718 1.59676  16
   0  -2  15 22.6156 3.03444  10
   0   2 -15 21.5954 2.85420   2
   0  -2  15 20.4382 3.00874   7
   0   2  15 22.6531 2.69506   2
   0  -2  15 19.2177 3.04562   4
   0  -2  15 21.6692 1.77844  16
   0  -2 -15 18.0872 2.69683  10
   0   2 -15 28.1656 1.52485  11
   0  -2 -15 20.7009 1.69205  13
   0   2  15 16.3848 1.32827   8
   0  -2  15 21.6137 2.23332   8
   0   2 -15 21.1315 2.01248  13
   0   2 -15 22.6905 2.07080   5
   0  -2 -15 16.7213 2.61883   2
   0   2 -15 21.7926 2.09999   1
   0   2  15 19.4858 2.35156  15
   0   2  15 21.6227 1.84198  13
   0  -2  16 179.958 11.3906  16
   0   2 -16 188.368 11.5948  13
   0  -2  16 167.706 12.4760   7
   0  -2 -16 172.996 11.3484  13
   0   2 -16 255.587 11.2419  11
   0   2 -16 186.941 11.5098   3
   0   2 -16 196.110 11.7662   1
   0   2  16 182.534 12.1856   2
   0  -2  16 189.823 12.8887   4
   0   2 -16 176.084 12.4571   2
   0   2  16 174.927 11.4734  13
   0  -2 -16 175.641 12.3740   2
   0   2 -16 184.291 11.7058   5
   0  -2  16 183.868 11.8005   8
   0   2  16 187.913 11.2891  16
   0  -2 -16 178.595 12.6785  10
   0  -2 -16 162.714 11.6326   5
   0  -2  16 174.513 12.0274  15
   0   2  16 183.296 12.0451   7
   0   2  16 173.403 11.9446  15
   0   2 -17 1.85927 1.27673   5
   0   2  17 1.71332 1.18632  13
   0  -2  17 4.32932 1.68750  15
   0   2 -17 1.96917 1.32777   1
   0  -2 -17 1.45163 0.94520  13
   0   2  17 4.02521 1.90609   7
   0  -2  17 3.11273 1.43535   8
   0   2  17 1.15001 0.76636  16
   0   2 -17 1.35050 2.11107   2
   0  -2 -17 4.86603 2.22007  10
   0   2 -17 1.23597 1.22174  13
   0  -2  17 2.13585 0.99126  16
   0  -2  17 1.01334 2.32682   7
   0   2  17 1.59964 1.62023  14
   0  -2 -17 1.37639 1.26547   5
   0   2 -17 4.59735 2.69969  10
   0  -2 -17 1.54247 2.01018   2
   0  -2 -18 45.8019 4.71067   2
   0  -2  18 51.3258 4.37534  15
   0   2  18 55.9459 4.47038   7
   0  -2  18 52.8926 4.00941   8
   0  -2 -18 62.1106 5.33916  10
   0   2 -18 52.4947 3.99346   5
   0   2 -18 54.0841 3.97633   1
   0  -2 -18 48.8707 3.95224   5
   0   2 -18 59.4631 5.44139  10
   0   2 -18 66.7095 5.34693   2
   0  -2  18 48.2392 4.89701   7
   0   2  18 44.0173 4.39721  14
   0   2  18 53.5854 3.45124  16
   0   2  18 47.1237 3.75214  13
   0  -2  18 54.9277 3.58752  16
   0   2  18 54.1260 4.45223  15
   0   2  19 4.28067 1.92325  14
   0  -2 -19-1.19039 1.56009   5
   0   2 -19 2.84993 1.59572   5
   0   2 -19-0.38735 2.50389   2
   0  -2 -19 3.00104 2.84420  10
   0   2  19 1.55302 1.82286  15
   0  -2 -19 2.10267 2.41167   2
   0  -2  19 1.39102 1.66153  15
   0   2  19-0.50638 1.78310   7
   0  -2  19-0.37653 2.57586   7
   0   2 -19 1.75067 3.01177  10
   0   2  19-0.93545 1.28947  13
   0   2 -20 97.7378 6.73419   5
   0   2  20 88.6565 7.10883   7
   0  -2 -20 90.7139 7.58169   2
   0   2 -20 105.679 8.05756   2
   0  -2  20 100.267 7.92021   7
   0   2 -20 125.683 8.64766  10
   0   2  20 103.801 7.40430  14
   0  -2  20 94.6815 7.21476  15
   0  -2 -20 104.109 8.16511  10
   0  -2  20 94.5511 6.52787   8
   0   2  20 98.8780 7.18591  15
   0  -2  21 1.00926 2.21769  14
   0   2  21 2.06072 2.03774  15
   0   2 -21-1.48100 3.16959  10
   0   2 -21-0.43783 2.95912   2
   0  -2 -21-0.39404 2.59746   2
   0  -2  21 3.16035 2.04289  15
   0  -2  21 1.23635 3.01376   7
   0   2  21 0.34626 2.03503  14
   0  -2 -21-1.45519 2.68496  10
   0   2  21-0.55973 2.08892   7
   0   2 -22 65.0509 6.74892  10
   0   2 -22 78.8171 6.77172   2
   0   2  22 66.3696 5.69578  15
   0  -2  22 71.4004 5.94805  14
   0   2 -23-0.97622 3.33914   2
   0   2  23 2.32677 2.26096  14
   0  -2  23 1.79237 2.40832  15
   0  -2 -23 3.48690 2.96398   2
   0  -2  23-2.26400 2.42301  14
   0   2  23 1.32977 2.16350  15
   0  -2  23 1.30861 4.11500   6
   0  -2  23 0.88654 2.86542   7
   0   3   0-0.39613 0.81932   9
   0   3   0-0.24483 0.27646  14
   0  -3   0 0.15465 0.27194  14
   0  -3   0 0.19997 0.87977   7
   0  -3   0-0.80763 0.85506   6
   0  -3   0 0.21933 0.48226  17
   0   3   0 0.77308 0.56658  17
   0   3   0 0.35939 0.71772   3
   0   3   1 610.816 33.6424  17
   0   3  -1 575.388 33.7851   9
   0  -3   1 560.648 33.4784  14
   0  -3   1 611.040 33.9464   6
   0  -3  -1 573.108 33.8040   7
   0   3  -1 609.662 33.8393   8
   0   3  -1 562.749 33.5336  15
   0  -3  -1 574.810 33.5625  17
   0   3   1 568.303 33.5294  14
   0  -3  -1 601.654 33.5250  14
   0   3  -1 547.372 33.6477   1
   0   3   1 552.147 33.7478   6
   0  -3  -1 558.679 33.7375   6
   0  -3   1 621.287 33.5811  16
   0   3  -1 593.875 33.7572   3
   0  -3   1 557.060 33.7037  17
   0  -3  -1 574.392 33.7916   8
   0  -3  -2 5.96437 0.87229   7
   0  -3  -2 6.07423 0.94061   8
   0  -3   2 6.65308 0.65706  16
   0   3  -2 6.17196 0.88214  10
   0   3  -2 6.57734 0.66667  15
   0   3   2 6.42462 0.65638  14
   0   3  -2 6.56974 1.03144   9
   0   3   2 6.02802 0.94877   6
   0   3   2 4.98157 0.82738   4
   0   3  -2 7.92098 1.30084   7
   0   3  -2 6.49473 1.01755   8
   0   3   2 6.88920 0.82857  17
   0  -3  -2 6.73431 0.71142  17
   0  -3   2 6.09793 0.63980   4
   0  -3   2 7.42102 1.18104   6
   0   3  -2 6.50066 0.68059   4
   0  -3  -2 6.53440 0.76898   6
   0  -3   2 4.89968 0.65587  15
   0   3   2 4.64291 0.85111   7
   0   3   2 5.29764 0.64898   1
   0   3  -2 7.02840 0.82734   1
   0  -3  -2 6.45804 0.83067   9
   0  -3  -3 989.809 54.5513   9
   0   3  -3 912.488 54.6992   8
   0   3   3 933.120 54.5468   3
   0   3   3 900.801 54.5460   8
   0  -3   3 919.766 54.4764   4
   0  -3  -3 927.751 54.5549   8
   0   3   3 902.611 54.5448   9
   0  -3  -3 851.067 54.4935   7
   0  -3  -3 1077.39 54.4822   6
   0  -3   3 935.450 54.4261  16
   0   3   3 965.255 54.5295   6
   0  -3   3 916.200 54.4873  15
   0  -3  -3 936.385 54.5618   3
   0  -3   3 951.791 54.6088  10
   0   3  -3 984.405 54.6364  10
   0   3   3 964.106 54.3988   1
   0   3  -3 986.568 54.5202   4
   0   3   3 776.771 54.4559  14
   0  -3   3 968.152 54.9558   6
   0   3   3 966.964 54.6630   4
   0   3   3 1029.06 54.6516  10
   0   3   3 922.837 54.5441   7
   0   3  -3 921.037 54.6456   9
   0   3  -3 957.077 54.4452  15
   0   3  -3 868.007 54.5554   1
   0   3  -3 1036.37 54.9038   7
   0   3   3 956.089 54.5468  17
   0  -3  -4 1.23525 0.61826   3
   0   3   4 0.56351 0.61828   7
   0   3   4 1.05669 0.59323   9
   0  -3   4 0.97813 0.53068  15
   0   3  -4 0.74949 0.73583   4
   0   3  -4 0.07701 0.65373   1
   0   3   4 0.32938 0.52462  14
   0  -3  -4 2.14205 0.69009   5
   0   3  -4 0.94306 0.87033   9
   0   3   4 1.02193 0.64352  17
   0   3  -4 2.31443 0.86926  10
   0  -3   4 0.54412 0.77256   4
   0   3  -4 1.75870 0.59490  13
   0   3  -4 1.33097 0.80783   8
   0   3   4 1.69298 0.39478   1
   0   3  -4 0.41244 1.02825   7
   0   3   4 1.34614 0.39627  15
   0   3   4 1.17355 0.86928  10
   0   3   4 1.80827 0.73347   3
   0   3  -4 0.89066 0.52323  15
   0  -3  -4 2.49444 0.63923   9
   0   3   4 1.21245 0.92217   4
   0   3   4 1.90539 0.92101   2
   0  -3   4 1.78281 0.88004  10
   0   3   4 0.42835 0.65166   5
   0   3   4 0.69048 0.58005   6
   0   3   4 0.77601 0.65456   8
   0   3  -5 800.712 46.2362  15
   0   3   5 804.320 46.2705   5
   0  -3   5 807.390 46.2843  15
   0   3  -5 818.346 46.4602   4
   0   3  -5 820.862 46.4493   8
   0   3   5 802.611 46.2564   3
   0   3   5 834.792 46.5116  10
   0   3   5 837.911 46.2106   6
   0  -3   5 756.837 46.4422  10
   0  -3  -5 801.218 46.2705   5
   0   3  -5 841.092 46.6778   7
   0   3   5 761.038 46.1721  15
   0   3  -5 784.530 46.4724  10
   0   3  -5 792.601 46.3905   9
   0   3   5 792.994 46.1846   7
   0   3   5 782.353 46.0506  13
   0   3   5 730.470 46.1906   9
   0   3  -5 813.416 46.1781  16
   0  -3   5 773.048 46.3938   4
   0  -3  -5 769.400 46.3883   2
   0   3  -5 808.738 46.2403  13
   0   3   5 804.244 46.6062   4
   0   3   5 799.357 46.4164   2
   0   3   5 767.242 46.1963   8
   0   3  -5 751.266 46.3248   1
   0   3   5 885.619 46.4182  17
   0  -3  -5 772.247 46.2387   3
   0   3   5 811.820 46.0423   1
   0   3   6 14.0195 1.20267   5
   0   3   6 12.3387 0.92902  13
   0   3   6 12.4945 0.85781   1
   0  -3   6 13.6034 1.31641   9
   0   3   6 12.3573 1.59442  10
   0   3  -6 13.4182 1.44641   8
   0   3  -6 14.7595 1.22357  13
   0   3  -6 16.4809 1.68512  10
   0  -3   6 12.5044 1.48346   4
   0   3  -6 12.4465 1.09041  16
   0   3   6 10.4551 1.09630  15
   0  -3   6 11.4017 1.21096  15
   0   3   6 14.4880 0.94657  11
   0   3   6 15.0291 1.14816   7
   0   3  -6 13.3364 1.55714   4
   0   3   6 9.72548 1.08933   9
   0   3   6 11.5824 1.15768   3
   0  -3  -6 12.0616 1.41007   2
   0  -3   6 10.5212 1.66689   7
   0   3   6 10.8324 1.12819   8
   0  -3  -6 13.8814 1.24620   5
   0  -3  -6 13.6814 1.18683   3
   0   3   6 11.5144 1.44373   2
   0  -3   6 9.30396 1.52177  10
   0   3   6 16.1390 1.55592  17
   0   3  -6 15.6276 1.36444   1
   0   3   6 11.6009 1.73391   4
   0   3  -6 12.4278 1.19280  15
   0   3  -6 15.3339 1.44391   9
   0  -3   7 366.340 21.8320  16
   0   3  -7 343.062 22.0265   1
   0   3   7 377.384 22.1938   2
   0   3   7 420.288 22.2791  17
   0  -3  -7 339.486 21.9489   5
   0  -3   7 380.311 22.0299   9
   0  -3   7 365.690 22.2724  10
   0   3   7 386.744 21.9322   5
   0   3   7 373.990 21.8576   3
   0   3  -7 343.034 22.0557   9
   0   3   7 349.339 21.9210  15
   0   3   7 395.437 22.5287   4
   0   3  -7 389.249 21.9943  15
   0  -3   7 334.595 22.1751   8
   0   3   7 325.389 21.8013   8
   0  -3  -7 347.374 22.1539   2
   0   3  -7 391.090 22.3570  10
   0   3   7 363.934 21.7337  13
   0   3   7 329.788 21.7768   9
   0   3  -7 350.081 22.3171   4
   0  -3  -7 363.144 21.8841   3
   0  -3   7 359.421 22.2509   4
   0   3  -7 382.312 22.1338   8
   0   3  -7 396.215 21.9480  13
   0   3  -7 364.158 21.8448  16
   0   3   7 382.828 22.3509  10
   0   3  -8 13.1398 1.22713  13
   0   3  -8 8.89358 1.37943   9
   0  -3   8 13.9869 1.76031  10
   0   3   8 11.4820 1.07718   8
   0   3   8 12.0958 1.26510  15
   0   3   8 13.7051 1.10480   3
   0  -3   8 10.3072 1.71383   4
   0   3  -8 13.0741 1.43138   8
   0   3  -8 12.6206 1.42021   1
   0  -3   8 11.7939 1.58619   8
   0   3   8 13.1614 1.23632   5
   0   3   8 12.4023 1.84191  10
   0   3   8 13.0796 2.00249   4
   0   3  -8 11.2361 1.23913  15
   0   3  -8 10.2151 1.73175   4
   0   3   8 10.3599 1.54623   2
   0  -3   8 12.2456 1.14027  16
   0   3  -8 13.1948 1.75759  10
   0   3   8 14.2854 0.86005  11
   0   3   8 12.0786 0.97538   9
   0  -3  -8 11.5711 1.15656   3
   0   3   8 12.7736 0.99331  13
   0  -3  -8 10.4528 1.28365   5
   0  -3   9 624.127 38.6800   8
   0   3   9 672.155 38.1800  13
   0   3   9 682.957 39.1190   4
   0   3  -9 711.429 38.3950  13
   0   3   9 677.975 38.3286   5
   0   3   9 640.226 38.9010  10
   0  -3   9 651.078 38.2521  16
   0   3   9 689.926 38.2020   3
   0   3  -9 627.160 38.5014   1
   0   3  -9 672.009 38.9449  10
   0   3   9 609.221 38.1691   8
   0  -3  -9 648.966 38.2651   3
   0  -3  -9 640.607 38.4191   5
   0  -3  -9 619.657 38.1334  13
   0  -3   9 643.526 38.8405  10
   0   3   9 683.978 38.0692   9
   0   3   9 632.801 38.4255  15
   0   3  -9 676.646 38.5448   8
   0   3  -9 678.915 38.4794  15
   0   3  -9 650.612 38.4786   9
   0  -3   9 651.665 38.8787   4
   0   3   9 650.538 38.6827   2
   0   3 -10 5.92343 1.15786   9
   0  -3  10 3.40440 1.72580   7
   0   3  10 5.21712 1.72301  10
   0  -3  10 7.94663 0.97729  16
   0   3 -10 7.47607 1.52284   2
   0   3 -10 7.71266 1.66593  10
   0  -3 -10 7.08504 1.12029   5
   0   3  10 6.42797 0.80139  13
   0   3  10 6.86452 1.98977   4
   0  -3 -10 6.32744 0.74864  13
   0   3 -10 9.11422 1.29135   8
   0   3  10 7.10145 1.10817  15
   0  -3  10 6.36303 1.59191   4
   0   3 -10 9.15103 1.11664  13
   0   3  10 9.18737 1.62443   2
   0   3 -10 9.33060 1.30159  15
   0   3 -10 7.33037 1.31071   1
   0   3  10 8.84619 1.05685   5
   0  -3  10 7.04447 1.21896  15
   0   3  10 7.51218 0.79102   8
   0  -3  10 5.81884 1.58460  10
   0   3  10 7.76125 0.81702   3
   0  -3 -10 7.39181 0.88482   3
   0  -3  10 7.72242 1.46762   8
   0  -3 -10 8.20895 1.59618  10
   0   3  11 260.348 15.3792   2
   0   3  11 265.271 15.7337  10
   0  -3  11 223.288 15.6337   7
   0   3 -11 257.739 15.1513   1
   0  -3 -11 246.714 14.6890  13
   0   3  11 263.771 14.8690   5
   0  -3  11 251.326 15.2158  15
   0  -3  11 258.028 15.5955  10
   0   3 -11 247.444 14.9991   9
   0  -3  11 245.349 14.8084  16
   0   3 -11 269.902 15.1307   8
   0   3 -11 265.229 15.5384   2
   0   3  11 233.089 14.6511   8
   0   3  11 225.188 15.0368  15
   0   3  11 250.918 14.7546  13
   0  -3  11 243.179 15.5975   4
   0   3 -11 264.761 15.1264  15
   0  -3  11 225.672 15.2238   8
   0  -3 -11 236.573 15.3428   2
   0   3 -11 258.316 15.7135  10
   0  -3 -11 261.659 14.7702   3
   0   3  11 281.358 16.0041   4
   0  -3 -11 247.856 15.5921  10
   0   3 -11 264.407 14.9805  13
   0  -3  12 13.1968 1.34533  16
   0   3  12 13.5474 1.65266  15
   0   3 -12 14.7712 1.70340  15
   0  -3  12 15.1977 2.33665  10
   0   3  12 13.3292 1.18011  16
   0   3  12 16.6820 1.41697   5
   0  -3  12 17.3086 1.80875  15
   0   3 -12 16.3238 1.57102  13
   0   3  12 19.5409 2.86783   4
   0  -3 -12 12.2395 1.23067   3
   0  -3  12 13.4891 2.36753   4
   0  -3 -12 13.7420 2.10011  10
   0   3  12 13.8972 1.13008   8
   0   3 -12 14.8121 2.11075   2
   0  -3  12 15.4486 2.01910   8
   0   3 -12 13.2867 1.64914   8
   0   3 -12 15.3671 2.35448  10
   0  -3 -12 16.6984 2.03163   2
   0  -3  12 14.7953 2.48281   7
   0  -3 -12 14.0494 1.22624  13
   0   3  12 14.3144 1.30116  13
   0   3 -12 17.3785 1.83368   1
   0   3  12 9.65941 2.24962  10
   0   3  12 15.1730 1.07844   8
   0   3 -12 15.2036 1.57746   9
   0   3  12 14.7938 2.07704   2
   0   3  13 268.773 14.8481  17
   0   3 -13 245.348 14.2288  15
   0  -3  13 221.405 14.3105   8
   0   3 -13 250.575 14.2483   1
   0  -3 -13 222.870 13.6833   3
   0   3  13 256.957 13.9065   5
   0   3  13 237.113 14.4922   2
   0  -3  13 217.087 13.8049  16
   0  -3 -13 234.850 13.7290  13
   0  -3  13 233.711 14.8887   4
   0  -3 -13 231.732 14.5533   2
   0  -3  13 232.467 14.9183   7
   0   3  13 225.913 13.5552   8
   0   3  13 226.298 13.5768   8
   0   3  13 231.108 13.7945  13
   0   3 -13 265.866 14.8411   2
   0  -3  13 232.049 14.7955  10
   0  -3  13 229.319 14.3163  15
   0   3 -13 242.821 14.9219  10
   0   3 -13 245.217 13.9824   9
   0   3 -13 224.657 13.8572  16
   0   3  13 254.589 15.2672   4
   0   3 -13 240.339 14.0244  13
   0   3  13 231.917 13.6988  16
   0   3  13 246.623 14.9775  10
   0  -3 -13 221.968 14.7523  10
   0   3  13 227.309 14.2115  15
   0   3 -14 9.92647 1.26406   9
   0  -3  14 10.6871 1.81081   8
   0   3 -14 8.62805 1.16677  16
   0  -3 -14 7.82537 2.16882  10
   0   3  14 11.3817 2.63770  10
   0   3  14 6.11555 1.51797  15
   0   3 -14 11.2010 2.18022   2
   0   3  14 9.00694 2.60202   4
   0  -3  14 12.3438 2.70526   4
   0   3  14 8.67756 2.14843  17
   0   3 -14 9.41150 1.42353  13
   0   3  14 8.38941 1.09161  13
   0  -3 -14 5.34465 1.87566   2
   0   3 -14 7.15921 2.36778  10
   0  -3  14 9.68253 2.36516  10
   0  -3 -14 9.09437 1.01743  13
   0   3  14 7.09061 1.87343   2
   0  -3  14 8.26333 1.17095  16
   0  -3  14 7.52684 1.52958  15
   0  -3  14 11.7148 2.54195   7
   0   3  14 10.6161 1.02596  16
   0   3 -14 8.95822 1.64345   1
   0   3 -14 7.64569 1.60093  15
   0   3  15 212.873 12.8321   2
   0   3 -15 202.006 13.3382  10
   0  -3  15 197.364 12.0500  16
   0   3 -15 219.462 12.3736   5
   0  -3 -15 194.803 11.9319  13
   0   3  15 200.095 12.0556  13
   0   3 -15 191.925 13.0897   2
   0  -3 -15 192.726 13.1895  10
   0   3  15 215.776 13.7441   4
   0  -3  15 210.019 13.2813  10
   0  -3  15 200.836 13.3286   4
   0  -3  15 200.517 13.2874   7
   0   3  15 197.905 11.8891  16
   0   3 -15 207.674 12.2754  13
   0  -3 -15 197.700 12.9181   2
   0   3 -15 202.069 12.0840  16
   0   3  15 200.837 13.3417  10
   0  -3  15 198.675 12.6580  15
   0   3 -15 207.978 12.0831   9
   0   3 -15 210.078 12.5118   1
   0   3 -15 203.828 12.5184  15
   0   3  15 223.200 13.2481  17
   0  -3  15 183.126 12.5465   8
   0   3  15 170.141 12.4399  15
   0   3  16 0.09480 0.94924  13
   0   3 -16-0.25763 1.14566   3
   0   3 -16-0.90441 1.11497  16
   0   3 -16 5.78471 2.53126  10
   0  -3  16-0.74813 1.02579  16
   0  -3  16 3.24298 2.39029   4
   0  -3 -16 0.29700 0.73937  13
   0  -3  16 1.37475 1.59222   8
   0   3  16 2.59182 2.18226   2
   0  -3 -16 0.74937 1.19955   5
   0  -3  16 0.23134 1.45484  15
   0   3  16-0.66852 0.73142  16
   0   3 -16 1.34411 1.23620   5
   0  -3 -16-0.28234 1.81269   2
   0   3 -16-0.17432 1.46042   1
   0   3 -16 0.32236 1.93967   2
   0  -3  16-1.42031 2.23299   7
   0  -3 -16-0.35052 1.94010  10
   0   3 -16 2.10163 1.26688  13
   0   3  16-0.20619 1.38498  15
   0  -3 -17 109.535 7.26915   5
   0   3 -17 100.431 8.08207   2
   0   3 -17 109.341 7.42674   1
   0   3  17 106.877 6.76507  16
   0  -3 -17 109.133 8.12676   2
   0   3  17 105.104 7.54249   7
   0   3 -17 116.075 8.61257  10
   0  -3  17 101.775 7.45936   8
   0  -3  17 99.5332 7.62949  15
   0   3  17 101.123 6.95314  13
   0   3 -17 112.647 7.33596   5
   0  -3  17 93.2298 8.15896   7
   0  -3  17 99.5504 6.92919  16
   0  -3 -17 107.016 8.38239  10
   0   3 -18-0.74539 2.34691   2
   0  -3  18 2.35762 2.76927   7
   0  -3 -18 0.96785 2.19693   2
   0   3  18 1.02391 1.12333  13
   0  -3  18 1.53212 1.10079  16
   0   3 -18 1.67615 1.53373   1
   0   3  18 2.41072 0.88361  16
   0  -3  18 0.53404 1.81961  15
   0   3  18 3.02976 1.78078   7
   0   3  18 4.53738 1.88168  15
   0  -3 -18 3.62571 2.29299  10
   0  -3 -18 0.82187 1.39859   5
   0  -3  18 3.97981 1.82896   8
   0   3 -18 7.03723 2.85092  10
   0   3 -18 3.41515 1.55511   5
   0   3  19 53.9340 4.56419  15
   0  -3  19 56.2744 4.41092   8
   0   3 -19 60.9448 5.45036   2
   0   3  19 51.4592 4.46255   7
   0  -3  19 60.0028 4.82412  15
   0   3 -19 57.3350 5.75024  10
   0   3  19 52.3461 3.88624  13
   0   3 -19 52.7961 4.25748   5
   0  -3  19 58.9583 5.52700   7
   0  -3 -19 57.8878 5.18590   2
   0   3 -20 2.55840 2.62445   2
   0  -3 -20 1.81966 2.56262   2
   0  -3  20 1.52217 1.95480  15
   0   3 -20 1.40705 2.99094  10
   0  -3  20 0.86230 3.05285   7
   0   3  20 0.47561 1.95259   7
   0   3  20 1.09096 1.79804  15
   0   3 -20 0.58667 1.63211   5
   0  -3  20-1.16726 1.72441   8
   0   3  20 0.13129 1.30401  13
   0   3 -21 79.5144 7.19221  10
   0  -3  21 80.4176 6.34811  15
   0  -3 -21 83.2076 6.81974   2
   0  -3  21 74.9109 7.10822   7
   0   3 -21 92.2747 7.31643   2
   0  -3  21 73.1752 7.85806   6
   0  -3  21 74.0457 6.32061  14
   0   3  22 4.95301 2.27331  15
   0  -3 -22 3.24333 2.87807   2
   0  -3  22 0.46436 3.12609   7
   0   3 -22 0.47888 3.10226   2
   0  -3  22 5.89576 2.47795  15
   0  -3  22 3.53638 2.32539  14
   0  -3  22 4.55219 3.85800   6
   0   3 -22 4.19656 3.63666  10
   0  -3  23 32.4582 3.97534  14
   0   3  23 32.1902 3.84600  15
   0  -3  23 38.0799 6.08575   6
   0   3 -23 42.8449 5.18696   2
   0  -3  23 24.3963 4.54236   7
   0  -3 -23 28.8680 4.41758   2
   0   3 -23 36.9420 5.28566  10
   0  -3  24-0.48976 3.33018   7
   0   4   0 1094.58 62.6559  14
   0   4   0 1012.94 62.9655   3
   0  -4   0 1115.69 63.2070   7
   0   4   0 1083.41 62.6929  15
   0   4   0 1033.75 63.0897   6
   0  -4   0 1122.57 62.6567  14
   0  -4   0 1068.01 62.7793  17
   0  -4   0 1169.42 63.1697   8
   0   4   0 921.723 62.9711   9
   0  -4   0 1142.21 63.1478   6
   0   4   1-0.55289 0.65099  17
   0  -4  -1 0.69060 0.84213   8
   0  -4   1 0.35516 0.29706  14
   0  -4  -1 1.50607 0.82476   9
   0   4  -1 0.87132 0.90923   9
   0   4   1 1.94558 1.03345   6
   0  -4   1-0.51367 0.72504  17
   0   4  -1-0.53472 1.13789   6
   0  -4   1-0.10189 0.47265  16
   0   4  -1 1.07286 0.88299   3
   0  -4  -1 0.59320 0.50704  17
   0  -4   1 1.24702 1.07999   6
   0   4  -1 1.02395 0.45715  15
   0  -4  -1-0.11871 0.89081   7
   0  -4  -1 0.81553 0.84425   6
   0   4  -1 0.46474 0.95030   8
   0   4   1 0.04659 0.50823   4
   0   4   1 0.47979 0.98103   7
   0  -4   1 0.89078 1.09725   7
   0   4   1 1.13437 0.38915  14
   0   4   2 593.941 36.9041  14
   0  -4   2 646.816 36.8308  14
   0   4  -2 620.071 37.2880   8
   0   4  -2 680.900 37.2023   3
   0  -4  -2 660.134 37.1799   9
   0   4   2 621.861 37.1646   6
   0  -4   2 618.710 37.1864  17
   0  -4  -2 608.578 37.1851   7
   0  -4  -2 660.698 36.9403  17
   0   4  -2 584.488 37.0690   1
   0   4   2 644.884 37.0315   4
   0  -4  -2 639.750 37.0973   6
   0  -4   2 596.933 37.4574   6
   0   4  -2 613.716 37.2228   9
   0   4   2 639.881 37.0389  17
   0  -4  -2 621.294 37.2111   8
   0  -4   2 615.592 36.9272  15
   0   4   2 584.542 37.1453   8
   0   4   2 589.614 36.9768   1
   0   4   2 642.113 37.2335   7
   0   4  -2 644.969 36.9001  15
   0  -4   2 663.706 36.9496  16
   0   4  -2 668.809 37.1235  10
   0   4  -2 687.030 36.8502   4
   0   4   3 11.5730 1.27724   6
   0   4   3 12.1620 1.27729   5
   0   4   3 12.0855 1.29603  10
   0   4   3 9.75842 1.30707   7
   0   4  -3 12.0933 1.22170   1
   0   4   3 12.6109 1.05885  14
   0  -4  -3 11.9061 1.31238   8
   0  -4   3 10.1670 1.04223  15
   0   4   3 11.9511 1.26211   8
   0   4  -3 10.1813 1.65120   7
   0   4   3 11.7489 1.30940   9
   0   4   3 11.6744 1.32115   3
   0   4  -3 11.6515 1.04982   4
   0   4   3 10.7093 1.30608   4
   0  -4   3 12.9604 1.01925   4
   0   4   3 11.3051 1.37561   2
   0   4   3 9.89142 1.15869  17
   0  -4   3 11.8367 1.03746  16
   0   4  -3 12.4368 1.00954  15
   0   4  -3 12.3530 1.39616   9
   0  -4  -3 11.5033 1.11088   6
   0  -4   3 9.81800 1.29508   9
   0   4  -3 8.24467 1.38387   8
   0   4   3 7.67281 0.99708   1
   0  -4   3 10.8751 1.73595   6
   0   4  -3 12.2013 1.30744  10
   0  -4  -3 13.4794 1.25605   7
   0  -4  -3 12.2554 1.21726   9
   0   4   4 447.980 25.1311  17
   0   4  -4 435.886 25.0688   4
   0  -4   4 401.679 24.9953   4
   0   4   4 418.513 25.0148  14
   0  -4   4 416.589 25.6253   6
   0   4  -4 455.315 25.2429  10
   0   4   4 404.580 24.8849  15
   0   4   4 412.565 25.1028   8
   0   4  -4 410.700 25.1341   1
   0  -4  -4 460.199 25.1588   8
   0   4   4 447.033 25.2384  10
   0   4  -4 423.660 25.2645   9
   0   4   4 452.495 25.2761   4
   0  -4  -4 474.293 25.0584   7
   0   4  -4 428.410 25.3177   8
   0   4   4 364.882 24.9035   1
   0   4   4 410.374 25.1153   7
   0   4  -4 394.019 25.5270   7
   0  -4  -4 485.274 25.1492   9
   0   4  -4 430.256 24.9641  15
   0  -4   4 450.721 25.0505  15
   0   4   4 401.877 25.1090   9
   0   4   4 434.119 25.1451   3
   0   4   4 424.237 25.1271   5
   0   4   4 435.527 25.0989   6
   0   4   4 470.417 25.2739   2
   0   4   5 3.06275 0.46852  13
   0   4  -5 1.86098 1.03123  10
   0   4   5 2.64683 0.80915   9
   0   4  -5 2.70061 0.96304   4
   0   4   5 2.65049 0.86579  17
   0  -4   5 3.24912 0.75610  15
   0   4  -5 2.00106 0.68478  15
   0   4   5 1.67263 1.02551   2
   0   4   5 2.54877 0.56802  15
   0   4   5 3.77728 1.14299  10
   0   4   5 3.65145 0.56602   1
   0  -4  -5 4.84535 0.84246   9
   0  -4  -5 2.11555 0.85334   3
   0   4   5 1.83730 0.80265   7
   0   4   5 2.19200 0.64035  14
   0   4  -5 2.49045 1.06779   9
   0   4   5 2.37761 0.79062   6
   0  -4   5 3.81798 1.11319  10
   0   4  -5 4.15337 0.97204   1
   0   4   5 2.91347 1.03765   4
   0   4   5 3.47617 0.80275   8
   0   4  -5 3.73455 1.35663   7
   0   4   5 2.13794 0.88137   3
   0   4   5 2.08443 0.88942   5
   0   4  -5 2.42486 0.71924  13
   0  -4   5 2.89840 0.88084   4
   0   4  -5 2.38934 1.04681   8
   0   4   6 538.948 32.8925   1
   0  -4   6 558.133 33.3650  10
   0  -4  -6 601.061 33.1777   3
   0   4   6 535.557 33.0907   7
   0   4   6 559.693 33.3480   2
   0   4   6 541.800 33.0159  15
   0   4   6 516.782 33.0842   8
   0   4  -6 573.190 33.1250  13
   0  -4  -6 623.254 33.2046   5
   0   4   6 547.733 33.1750  14
   0   4  -6 544.013 33.3217   9
   0   4   6 614.091 33.4811  10
   0  -4   6 531.146 33.2387   4
   0  -4   6 552.180 33.1770  15
   0   4  -6 595.464 33.3771   4
   0   4  -6 571.290 33.4228  10
   0   4   6 532.320 33.0899   9
   0   4  -6 577.553 33.3806   8
   0   4   6 584.109 33.1093   6
   0   4  -6 563.327 33.0852  15
   0   4   6 593.572 33.1984   5
   0   4   6 616.526 33.3358  17
   0   4   6 587.784 32.8939  13
   0   4   6 595.389 33.5590   4
   0   4  -6 596.130 33.6831   7
   0   4   6 560.521 33.1577   3
   0  -4   6 606.523 33.3285   9
   0   4  -6 549.430 33.2456   1
   0   4   7 12.1471 1.24568   8
   0   4   7 17.0406 1.88002  10
   0   4   7 12.0313 1.26079   6
   0   4   7 13.0687 1.30370   7
   0  -4   7 14.2348 1.54280   9
   0  -4   7 11.8947 1.73757  10
   0   4  -7 11.1096 1.43152   1
   0   4  -7 13.2734 1.33109  15
   0  -4   7 12.2687 1.20896  16
   0   4   7 12.4984 0.94464   1
   0   4  -7 8.69354 1.64072   4
   0  -4   7 14.1865 1.65124   4
   0   4   7 14.9135 1.97984   4
   0   4   7 14.8384 1.68209  17
   0   4   7 12.8468 1.39382   5
   0  -4  -7 13.0807 1.36005   3
   0   4  -7 13.3822 1.59263   9
   0   4   7 10.8554 1.35475  14
   0   4  -7 10.8232 1.54036   8
   0   4   7 11.9821 1.19518  15
   0  -4   7 11.8197 1.75728   8
   0   4   7 12.7492 1.23973   9
   0  -4  -7 12.3341 1.34096   5
   0   4  -7 15.7117 1.34581  13
   0   4   7 15.9346 1.05623  11
   0   4   7 12.1896 1.64571   2
   0   4   7 13.0672 1.34454   3
   0   4   7 13.9597 1.02778  13
   0   4  -7 18.2250 1.86849  10
   0  -4   8 378.504 24.2579   4
   0   4   8 370.744 23.9134  15
   0   4   8 381.613 23.8650   7
   0   4   8 368.590 23.8461   8
   0   4   8 409.966 23.7251  13
   0   4   8 416.099 23.9549   6
   0  -4  -8 395.052 24.0143   5
   0   4   8 421.139 24.2890  17
   0   4  -8 375.060 24.1152   1
   0   4   8 376.353 24.0766  14
   0   4   8 411.827 24.2965   2
   0  -4   8 379.289 23.8419  16
   0  -4   8 400.797 24.1174   9
   0   4  -8 401.953 24.4333  10
   0   4  -8 403.831 23.9948  15
   0  -4  -8 408.957 23.9530   3
   0   4   8 415.586 24.4488  10
   0   4   8 422.723 23.9942   5
   0   4   8 394.659 23.9122   3
   0   4   8 416.301 24.5848   4
   0   4   8 380.488 23.8260   9
   0  -4   8 380.843 24.3179  10
   0   4  -8 431.913 24.0002  13
   0   4  -8 363.790 24.1146   9
   0  -4   8 386.651 24.3567   8
   0   4  -8 405.829 24.2210   8
   0   4  -9 8.76479 1.28772  15
   0   4   9 9.82728 0.78371  11
   0   4   9 11.6087 1.94443  10
   0   4  -9 10.4102 1.83187  10
   0  -4   9 7.16619 1.67472  10
   0   4  -9 9.42228 1.52228   8
   0   4   9 9.14526 1.05038   8
   0   4  -9 7.19034 1.55195   2
   0   4   9 9.56804 1.05475   3
   0   4   9 7.45105 1.04123   7
   0   4  -9 11.8803 1.23135  13
   0   4   9 11.6964 1.24839   6
   0   4  -9 7.03879 1.42490   9
   0   4   9 6.67753 1.24140  14
   0   4   9 10.6959 1.22544   5
   0   4   9 10.1851 1.64901   2
   0  -4   9 5.20882 1.53327   8
   0   4   9 6.83957 1.82658   4
   0  -4   9 10.2524 1.10193  16
   0   4  -9 7.47667 1.37554   1
   0  -4  -9 9.16280 1.30613   5
   0   4   9 9.35229 0.86338  13
   0   4   9 8.12534 0.90977   9
   0  -4  -9 8.63934 1.09369   3
   0  -4   9 6.38368 1.66450   4
   0   4   9 7.97470 1.14256  15
   0   4   9 10.3483 1.67747  17
   0   4 -10 363.854 20.7725  16
   0  -4  10 339.520 21.0552  15
   0   4 -10 349.093 21.0348   9
   0   4  10 339.624 20.8835  15
   0   4  10 329.039 20.6435   8
   0  -4  10 361.619 21.4067  10
   0   4  10 335.397 20.5488   9
   0  -4 -10 364.957 20.7659   3
   0   4  10 350.938 20.7230   7
   0   4 -10 328.249 21.3915  10
   0   4 -10 365.186 21.3960   2
   0   4  10 379.469 20.6996   3
   0   4 -10 359.983 21.0907   8
   0   4  10 354.700 21.2368   2
   0   4 -10 354.295 20.9347  15
   0   4  10 384.059 21.3573  17
   0   4 -10 356.682 21.0834   1
   0   4  10 368.618 20.8377   5
   0   4 -10 377.898 20.8805  13
   0   4  10 345.214 20.5999  13
   0  -4  10 331.497 21.2426   8
   0   4  10 321.641 21.0487  14
   0   4  10 357.556 21.4800  10
   0   4  10 370.872 21.7248   4
   0  -4  10 355.141 20.7328  16
   0  -4  10 346.037 21.3676   4
   0  -4 -11 18.3390 2.16850   2
   0   4  11 24.6604 2.49464  17
   0   4 -11 17.7610 2.00217   1
   0  -4 -11 16.2125 1.53847   3
   0   4 -11 20.3998 2.08455   8
   0   4  11 16.6839 1.44971   3
   0  -4  11 16.5474 2.33298  10
   0  -4  11 17.8581 2.26836   8
   0   4 -11 22.1969 1.92872  15
   0  -4  11 15.8987 1.86474  15
   0  -4  11 21.0665 1.63345  16
   0   4  11 18.1898 1.42528  13
   0   4  11 16.8530 1.65301   5
   0   4 -11 20.0688 1.65086  16
   0   4  11 14.0628 1.91579  14
   0   4 -11 27.6709 2.49434   2
   0   4  11 16.5819 1.22682   9
   0   4  11 15.8121 2.46210  10
   0   4  11 15.9639 1.42899   8
   0   4 -11 20.6150 2.49361  10
   0   4  11 20.9746 2.90985   4
   0   4 -11 18.9290 1.75341  13
   0   4  11 15.6993 1.74291  15
   0   4  11 19.4327 1.57504   7
   0   4  11 17.4847 2.28433   2
   0  -4  11 14.8282 2.27599   4
   0  -4  11 23.6346 2.84489   7
   0   4 -11 17.7060 1.95849   9
   0  -4  12 171.676 11.6521   7
   0   4  12 177.297 11.1033   2
   0   4  12 197.451 11.8451   4
   0   4  12 174.115 10.7761  15
   0   4  12 169.527 10.3747  13
   0   4 -12 169.006 10.7471  15
   0   4 -12 189.189 10.8871   8
   0   4 -12 172.835 11.2486   2
   0  -4  12 158.297 11.0485   8
   0   4 -12 184.370 10.6727  13
   0  -4  12 167.942 10.4735  16
   0  -4  12 167.801 11.2823  10
   0  -4  12 174.982 10.9346  15
   0   4  12 173.994 10.3506   3
   0  -4 -12 174.922 11.1154   2
   0   4 -12 177.577 10.9356   1
   0   4 -12 166.642 10.7539   9
   0   4  12 176.714 10.5529   5
   0   4 -12 196.623 11.5776  10
   0   4 -12 182.313 10.5492  16
   0   4  12 162.086 10.3042   8
   0   4  12 184.294 11.5075  10
   0  -4  12 173.942 11.3595   4
   0   4  12 167.514 10.9340  14
   0   4  12 193.676 11.3051  17
   0   4  13 2.44780 1.99291  17
   0   4  13 0.21498 0.70149  13
   0   4 -13 0.29299 1.94362  10
   0   4  13-1.75268 2.20185  10
   0   4 -13-1.78945 1.24562   9
   0   4  13 0.76844 1.00371   5
   0   4  13-0.62772 1.66007   2
   0   4 -13-0.77587 1.20915   8
   0  -4  13 0.63599 0.92485  16
   0  -4  13 1.06945 1.86123  10
   0   4 -13 0.36735 1.05002  13
   0  -4  13 2.00949 2.09132   7
   0   4  13 1.02451 2.40451   4
   0   4 -13 0.87259 0.98693  16
   0   4 -13 2.13971 1.33516  15
   0  -4  13-0.27550 1.81599   4
   0  -4  13 0.95023 1.21191  15
   0  -4 -13 1.35033 1.36461   2
   0   4  13-0.20566 0.50826   8
   0   4  13 0.47208 1.19197  15
   0   4 -13-0.87255 1.43861   1
   0  -4  13 0.64279 1.40327   8
   0   4  13 1.21135 1.32224  14
   0   4 -13-0.26202 1.63615   2
   0   4  14 128.920 7.73821  16
   0   4 -14 124.292 9.02088  10
   0   4  14 116.052 8.24247  15
   0   4 -14 135.192 8.13366  13
   0   4 -14 135.472 8.93151   2
   0   4 -14 119.948 8.05621   9
   0   4  14 126.792 7.80897  13
   0   4 -14 120.116 8.13187   3
   0   4  14 143.377 9.28847  10
   0  -4  14 131.419 7.93511  16
   0   4 -14 135.818 8.26992   8
   0  -4  14 114.087 8.81653  10
   0   4  14 127.139 7.92345   5
   0   4  14 135.254 8.64588   2
   0   4  14 133.451 9.42752   4
   0  -4  14 125.030 9.00645   4
   0  -4 -14 121.860 8.60804   2
   0   4 -14 140.068 8.46929   1
   0   4  14 108.117 8.37206  14
   0  -4  14 132.358 9.30736   7
   0   4 -14 135.819 8.32765  15
   0   4  14 150.203 9.01418  17
   0   4 -14 129.309 7.95024  16
   0  -4  14 129.241 8.46529  15
   0  -4  14 126.288 8.56942   8
   0   4 -15 0.38210 1.17303   9
   0  -4  15 1.68549 1.00771  16
   0   4  15 0.37529 1.35148  15
   0   4 -15-0.34164 2.17913  10
   0   4  15 0.87288 0.72413  16
   0  -4  15 1.55537 2.46846  10
   0   4  15 2.36263 1.87509  14
   0   4 -15 1.80314 1.34668   3
   0   4 -15 0.13710 1.18551  13
   0   4 -15 1.05730 1.32267  15
   0   4  15 1.62244 1.80669   2
   0  -4  15 2.59721 2.37455   4
   0  -4  15 0.22346 1.39627  15
   0   4  15 0.34020 2.52680  10
   0   4 -15 0.74259 0.98062  16
   0  -4  15-0.22546 1.70844   8
   0  -4  15 3.72980 2.61180   7
   0  -4 -15-0.52041 1.84304   2
   0   4  15 0.90725 0.93286  13
   0   4 -15 0.61680 1.92638   2
   0   4 -15 0.77001 1.54152   1
   0   4  15 1.71722 2.13662  17
   0  -4  16 133.417 8.38074  16
   0   4  16 127.987 9.11141  14
   0   4  16 135.827 8.29263  13
   0  -4 -16 127.926 9.21038   2
   0   4  16 146.369 9.24771   2
   0   4  16 138.531 8.17351  16
   0  -4  16 131.138 9.04861  15
   0  -4 -16 123.136 8.61181   5
   0   4 -16 138.291 9.81784  10
   0  -4  16 136.550 9.76597   4
   0  -4  16 138.141 9.11125   8
   0  -4  16 134.320 9.84223   7
   0   4 -16 130.028 9.54957   2
   0   4  16 124.421 8.83603  15
   0   4 -16 145.986 8.46579  16
   0   4 -16 147.009 8.96885   1
   0  -4 -17 2.38320 2.10910   2
   0   4 -17 3.52069 2.63689  10
   0   4  17 4.39798 0.93846  16
   0  -4  17 2.26080 1.11789  16
   0   4 -17 4.79671 1.24226  16
   0   4 -17 2.70923 1.73214   1
   0   4  17 4.30304 1.06478  13
   0  -4  17 5.18261 1.84801  15
   0  -4  17 6.74623 2.04414   8
   0  -4  17 0.41152 2.66903   7
   0   4  17 4.63628 2.03725  14
   0   4 -17 2.73739 1.45586   5
   0   4  17 4.40382 1.73770  15
   0  -4 -17 4.63338 1.48666   5
   0   4 -17 1.07847 2.27152   2
   0  -4  18 93.0099 7.10324  15
   0   4  18 93.8649 6.93461  15
   0   4  18 86.4277 7.12313  14
   0   4 -18 109.617 6.77491   5
   0   4  18 101.825 6.30373  13
   0   4 -18 111.530 7.05875   1
   0   4  18 90.7175 6.73777   7
   0   4 -18 105.389 8.06178  10
   0  -4  18 88.9515 6.28872  16
   0  -4  18 104.311 7.10240   8
   0  -4 -18 101.626 7.46679   2
   0  -4  18 93.6328 7.98679   7
   0   4 -18 100.545 7.80410   2
   0   4 -18 106.655 6.45080  16
   0  -4  19 1.79685 2.98017   7
   0  -4 -19-1.68959 2.44552   2
   0   4  19 1.35073 1.17687  13
   0  -4  19 0.93902 1.81282   8
   0   4  19 0.31136 2.02625  14
   0   4 -19 5.36990 1.89935   5
   0   4 -19-1.24336 2.67913   2
   0   4  19 2.27367 1.84785  15
   0   4 -19-1.32788 2.00987   1
   0  -4  19-0.29637 2.12203  15
   0   4 -19-2.22648 2.82031  10
   0   4 -20 78.0453 6.15548   2
   0   4 -20 53.4142 5.98098  10
   0  -4 -20 59.7095 5.40736   2
   0   4  20 55.5142 4.74535  15
   0   4  20 53.9480 5.08131  14
   0   4  20 50.2472 3.92903  13
   0  -4  20 49.5776 5.67396   7
   0   4 -20 57.1660 4.48190   5
   0  -4  20 59.8296 6.81231   6
   0  -4  20 57.1268 4.90382  15
   0  -4  20 58.6143 4.62081   8
   0  -4  21 4.36299 3.39535   7
   0  -4  21 4.61529 2.44989  14
   0  -4  21 1.94072 3.95309   6
   0  -4 -21 1.88222 2.49895   2
   0   4  21 2.46104 2.37797  14
   0   4 -21-3.27084 2.98109   2
   0   4 -21-1.00141 3.23767  10
   0  -4  21 2.00830 2.04697  15
   0   4  21 2.57632 2.17031  15
   0   4 -22 47.2996 5.55896  10
   0  -4  22 51.5328 5.52260   7
   0   4  22 33.3809 3.82724  15
   0   4  22 30.8182 3.97557  14
   0  -4  22 45.3647 6.24619   6
   0  -4  22 37.3720 4.26801  14
   0   4 -22 29.1505 4.74411   2
   0  -4  22 27.8176 3.86290  15
   0  -4 -22 42.6802 4.68456   2
   0  -4  23-0.73729 2.72579  14
   0  -4 -23 5.81828 3.19520   2
   0  -4  23 2.56961 3.68051   7
   0  -4  24 18.3561 4.41688   7
   0  -5   0 0.06125 0.36432  14
   0   5   0 0.40473 0.35474  14
   0   5   0-1.61056 1.31125   7
   0  -5   0-0.16704 1.12894   7
   0   5   0-0.08560 0.44953  15
   0   5   0 0.14913 1.29803   6
   0  -5   0-0.44289 1.11823   6
   0  -5   0 0.58358 0.57456  17
   0   5   1 834.590 51.4445  17
   0   5  -1 867.958 51.8703   6
   0   5   1 884.708 51.2464  14
   0  -5  -1 860.810 51.6773   6
   0  -5  -1 907.900 51.8195   7
   0   5   1 780.376 51.6339   8
   0   5  -1 829.262 51.2554  15
   0   5   1 908.267 51.7501   6
   0  -5   1 887.179 51.9064   6
   0   5  -1 895.685 51.6553   3
   0   5   1 839.153 51.4500   1
   0  -5  -1 900.624 51.2929  17
   0  -5   1 919.399 51.1833  14
   0  -5   1 895.488 51.4295  17
   0   5   1 957.823 51.2924   4
   0   5   1 879.843 51.7948   7
   0   5  -1 877.875 51.7084   9
   0   5  -2 16.3502 1.81215   3
   0  -5   2 18.6986 1.78018  17
   0  -5   2 21.9911 1.55953  16
   0   5   2 21.6970 2.04948   7
   0   5   2 16.3420 1.64529  17
   0  -5  -2 24.6288 1.88162   6
   0  -5  -2 22.7649 1.99546   7
   0   5   2 20.1830 1.68800   1
   0   5   2 22.2072 1.64784   4
   0   5  -2 19.3349 1.78820  10
   0  -5   2 22.5422 2.26661   6
   0   5   2 16.4825 1.87301   8
   0   5  -2 20.1331 1.44951  15
   0  -5   2 19.2136 1.35690  14
   0  -5  -2 20.9502 1.97693   8
   0   5   2 20.9239 1.94213   9
   0   5  -2 22.1153 2.04876   8
   0   5   2 23.5331 1.91296   5
   0   5   2 18.1435 1.89732   3
   0  -5  -2 19.3499 1.50994  17
   0   5   2 18.6253 1.90372   6
   0   5  -2 21.0768 2.00801   9
   0   5   2 20.4309 1.47198  14
   0   5  -3 381.743 23.0844   1
   0   5   3 395.324 23.1410   3
   0   5  -3 404.413 22.7755   4
   0   5   3 362.373 22.8373  14
   0   5  -3 400.310 23.1742   3
   0   5   3 410.625 23.1031   5
   0   5   3 381.961 23.1793   7
   0  -5  -3 413.844 23.1304   7
   0   5  -3 381.604 23.2684   8
   0  -5   3 395.987 22.8863  15
   0   5  -3 388.822 23.0661  10
   0  -5   3 413.022 22.8787  16
   0  -5   3 384.246 22.7291  14
   0   5   3 398.783 22.8650  16
   0   5   3 359.065 23.1085   8
   0   5   3 405.156 23.0252  17
   0  -5  -3 407.683 22.9958   6
   0   5  -3 394.475 22.8146  15
   0   5   3 364.599 23.1001   9
   0   5   3 408.835 23.0431   4
   0   5  -3 369.596 23.2240   9
   0  -5   3 356.461 23.1766  17
   0  -5  -3 402.902 23.2171   8
   0   5   3 383.854 23.1172   6
   0   5   3 369.978 22.9069   1
   0   5  -4 2.02362 1.02031  10
   0   5  -4 1.27429 0.59798  15
   0   5   4 1.69268 0.93405   5
   0   5  -4 2.47142 1.20100   8
   0   5   4 1.55034 0.95404   4
   0  -5  -4 1.92451 0.88611   9
   0   5  -4 1.67577 1.10853   3
   0   5   4 2.18801 0.88036  17
   0  -5  -4 1.86514 0.68409   6
   0   5   4 1.64625 0.59994  16
   0   5   4 1.70657 0.63714  14
   0  -5   4 0.97854 0.62985   4
   0   5   4 0.93872 1.08124   2
   0   5  -4 1.46657 1.03602   9
   0  -5   4 1.73289 0.65977  16
   0   5   4 2.71711 0.96336   6
   0  -5   4 1.47670 0.67321  15
   0   5   4 0.14566 0.71574   1
   0  -5  -4 1.95494 0.84553   7
   0   5   4 0.93978 0.95207   9
   0  -5  -4 1.34959 0.96406   8
   0   5  -4 0.35566 0.87550   1
   0   5   4 1.70850 0.46277  15
   0   5   4 0.37353 0.93306   7
   0   5  -4 1.37342 0.64161   4
   0   5   4 0.60687 0.93204  10
   0   5   4 2.57215 1.05048   3
   0   5   4 1.30012 0.94560   8
   0   5   5 213.196 13.1847   9
   0   5   5 207.161 13.1760   8
   0  -5   5 226.821 13.0445   4
   0  -5   5 221.792 13.0992  15
   0   5  -5 225.617 13.4499   8
   0   5  -5 223.909 13.2566   1
   0   5   5 212.025 13.1957   3
   0   5  -5 222.408 13.3171   3
   0  -5  -5 243.485 13.2567   8
   0   5   5 226.101 13.2446   5
   0   5  -5 233.099 13.3480  10
   0   5  -5 223.057 13.6903   7
   0   5   5 210.497 13.0525  14
   0   5  -5 218.455 12.9834  15
   0   5   5 215.941 12.9012  15
   0   5   5 228.130 13.3470  10
   0   5  -5 205.608 13.3569   9
   0   5   5 244.759 13.4062   2
   0   5   5 202.306 13.1747   7
   0   5   5 229.100 13.3816   4
   0   5   5 204.505 12.9390   1
   0   5   5 202.979 13.1470   6
   0   5   5 218.275 13.2121  17
   0   5   6 21.4738 1.92586   5
   0   5  -6 19.4995 1.63575  15
   0   5   6 19.6036 1.98185   2
   0   5  -6 19.3931 2.05842   9
   0   5   6 18.9393 1.79072   7
   0   5   6 18.6360 1.78973   9
   0   5  -6 22.8920 2.17696   8
   0   5   6 19.2420 1.52461  15
   0   5  -6 17.4333 1.71733  13
   0   5   6 19.9876 2.08693  10
   0   5   6 15.6430 1.49893   1
   0   5   6 19.1291 1.83871   3
   0  -5   6 19.4936 2.04014  10
   0   5   6 20.3143 1.42098  13
   0   5  -6 19.5771 1.90464   1
   0   5   6 23.7364 2.00447  17
   0   5   6 20.9369 2.12708   4
   0  -5   6 21.4490 2.07748   9
   0   5  -6 18.9872 1.99968  10
   0  -5   6 20.2177 1.76336  15
   0  -5   6 19.8464 1.78341   4
   0   5   6 20.8867 1.79685   6
   0   5   6 23.4647 1.87149   8
   0   5   6 17.8651 1.66653  14
   0   5  -6 17.4934 2.26628   7
   0   5   7 293.453 17.9645   6
   0  -5   7 270.191 18.0294   4
   0   5   7 319.067 18.3754  10
   0   5   7 296.722 17.8278  15
   0  -5   7 288.327 18.2258  10
   0   5  -7 305.578 17.9735  13
   0   5   7 289.661 17.9465   8
   0  -5   7 298.856 18.8911   6
   0   5   7 305.656 17.6833  13
   0   5   7 291.807 17.9685   7
   0   5   7 286.841 17.9963  14
   0   5  -7 314.001 18.3408  10
   0   5  -7 312.212 18.3047   8
   0   5   7 322.193 18.2100  17
   0   5   7 303.271 17.7102   1
   0  -5   7 323.353 18.2277   9
   0   5  -7 295.385 18.2356   9
   0   5  -7 290.988 18.1397   1
   0   5  -7 320.220 17.9065  16
   0  -5   7 306.239 18.8058   7
   0   5   7 295.818 17.9525   9
   0   5  -7 300.833 17.8995  15
   0   5   7 300.672 18.0194   3
   0   5  -7 302.810 18.5967   7
   0   5   7 335.695 18.5259   4
   0   5   7 317.333 18.2945   2
   0  -5   7 296.195 17.8351  16
   0   5   7 311.341 18.0686   5
   0   5   8 3.98006 0.98066   8
   0   5  -8 7.18592 1.46569   8
   0  -5   8 4.41537 1.81460   6
   0   5   8 6.06098 0.76504  11
   0   5   8 5.42020 1.01800   9
   0   5  -8 6.10623 1.01495  13
   0   5   8 3.74239 0.58641   1
   0  -5   8 6.04564 1.91838   7
   0  -5   8 6.12511 0.95862  16
   0   5   8 4.08516 1.48104   2
   0  -5   8 4.08596 1.30361   4
   0   5  -8 4.87132 1.34978   1
   0   5  -8 3.18148 0.89035  16
   0   5  -8 5.53711 1.50746  10
   0   5   8 3.90224 1.62630   4
   0   5   8 4.68781 0.89646  15
   0   5   8 5.78761 1.09794   6
   0   5   8 5.45715 1.14493   5
   0   5   8 5.29943 1.08905   3
   0   5  -8 3.58614 1.37295   9
   0  -5   8 6.35148 1.73939   8
   0   5   8 3.37528 1.01825  14
   0   5   8 5.14075 0.66822  13
   0  -5   8 4.76900 1.41713  10
   0   5   8 5.87290 1.07305   7
   0   5  -8 4.92300 1.04739  15
   0   5   8 4.91405 1.35754  17
   0   5   8 5.93760 1.67856  10
   0  -5   9 160.245 11.2452   4
   0   5   9 167.594 11.0993  14
   0   5   9 164.449 10.8309   9
   0   5   9 188.569 11.0396   5
   0   5  -9 177.351 11.4998  10
   0   5   9 166.739 10.9057  15
   0  -5   9 164.875 11.3826  10
   0   5   9 164.524 10.9167   7
   0   5   9 166.353 10.8726   8
   0   5  -9 184.736 11.0036  13
   0  -5   9 168.236 11.4731   8
   0   5  -9 180.277 11.2774   1
   0   5   9 172.389 10.9412   3
   0   5   9 175.444 10.9674   6
   0  -5   9 174.505 10.8579  16
   0  -5   9 180.671 12.0982   6
   0   5   9 178.127 10.6845  13
   0   5  -9 181.397 11.3083   8
   0   5   9 181.775 11.5340  10
   0   5  -9 162.250 11.2047   9
   0   5   9 185.243 11.4125   2
   0   5   9 183.634 11.3149  17
   0   5  -9 194.916 10.9459  16
   0   5   9 186.497 11.7248   4
   0   5  -9 182.006 11.0019  15
   0   5  10 19.7236 1.89405   5
   0  -5  10 18.8500 1.74021  16
   0  -5  10 15.8833 2.29552   4
   0  -5  10 21.2746 2.48375  10
   0   5  10 22.2854 2.45690   2
   0   5 -10 21.7479 1.92004  15
   0   5  10 19.8695 1.64290   9
   0  -5  10 18.8669 2.89271   6
   0  -5  10 18.4107 2.01821  15
   0   5  10 21.8331 1.78033   3
   0   5 -10 22.0681 2.22620   9
   0  -5  10 23.5393 2.58712   8
   0   5 -10 15.8787 2.10859   1
   0   5  10 14.9222 1.94550  14
   0   5  10 21.5479 2.67099  10
   0   5  10 27.7052 2.54621  17
   0   5  10 21.8840 1.87806   6
   0   5  10 22.3635 1.44861  11
   0   5  10 20.2674 1.80257  15
   0   5 -10 21.1282 2.27395   8
   0   5 -10 15.1496 2.32014  10
   0   5  10 20.3758 1.51584  13
   0   5  10 17.5839 1.71614   8
   0   5 -10 21.1849 1.79441  16
   0   5  10 20.3800 2.71600   4
   0   5  10 18.2792 1.76167   7
   0   5 -10 17.3246 2.29484   2
   0   5 -10 21.7431 1.91124  13
   0  -5 -10 14.5188 2.11164   2
   0   5  11 299.009 17.2184   6
   0   5  11 337.283 18.3427   4
   0   5  11 309.389 17.0538   3
   0   5  11 300.967 17.2133   5
   0   5  11 253.040 16.9563   8
   0   5 -11 297.889 17.5521   8
   0   5  11 275.759 17.0832   7
   0   5  11 285.272 16.8896   9
   0   5 -11 278.423 17.7689   2
   0   5  11 269.204 17.4179  14
   0   5  11 292.431 17.6460   2
   0  -5  11 299.507 18.6205   6
   0   5 -11 279.430 17.8640  10
   0   5 -11 298.332 17.4079   3
   0  -5  11 265.485 17.6311   4
   0   5  11 318.692 17.7582  17
   0   5  11 291.926 16.8961  13
   0  -5  11 277.986 17.0532  16
   0   5 -11 306.891 17.2434  13
   0   5 -11 302.111 17.5520   1
   0  -5  11 281.306 17.4393  15
   0   5 -11 280.810 17.0985  16
   0  -5  11 284.026 17.7713  10
   0  -5  11 290.113 17.8003   8
   0   5 -11 292.564 17.4565   9
   0   5  11 265.137 17.1838  15
   0   5  11 306.528 17.9930  10
   0   5 -11 295.723 17.2797  15
   0  -5 -11 269.492 17.5596   2
   0  -5  12 0.92556 1.33511  15
   0   5  12-0.91826 1.76608  17
   0  -5  12 2.42433 1.68985   4
   0  -5  12-0.35455 1.94638   7
   0   5 -12 1.01078 1.03227  13
   0   5 -12 2.65161 1.43720   1
   0  -5  12 1.92245 1.62636   8
   0   5  12 1.69931 1.07607  15
   0   5  12 0.79962 1.11818   5
   0   5 -12 2.58141 1.45750   3
   0   5 -12 2.16052 1.51079   8
   0   5 -12 1.71470 1.15183  15
   0   5  12 1.90939 0.80127   3
   0   5 -12-0.42316 0.95137  16
   0   5  12 2.16290 1.16228   6
   0  -5  12 3.26674 1.86803  10
   0   5 -12 1.66948 1.84777  10
   0   5  12 2.85148 1.07833   7
   0   5  12 2.14036 1.66998   2
   0   5  12 2.78064 2.25598  10
   0  -5  12 1.84241 1.04980  16
   0  -5 -12-0.65554 1.58350   2
   0   5  12 1.36818 0.69645  13
   0   5  12 1.95294 0.57171   9
   0   5  12 0.94928 1.35443  14
   0   5  12 1.28359 2.24833   4
   0   5 -12 1.53621 1.60107   2
   0   5 -12 2.53537 1.31381   9
   0  -5  12 0.82691 2.11724   6
   0   5  12 1.08888 0.77672   8
   0  -5  13 182.815 11.4159  15
   0   5 -13 188.932 11.2791   9
   0   5  13 196.970 11.1195   6
   0  -5 -13 166.740 11.5101   2
   0   5  13 172.852 11.1379  15
   0   5 -13 183.261 11.8720   2
   0  -5  13 182.656 11.6511   8
   0   5  13 206.772 12.1098  10
   0   5 -13 189.949 11.4521   1
   0   5 -13 203.487 11.4200   8
   0  -5  13 182.177 12.5477   6
   0   5 -13 189.258 11.1003  13
   0   5  13 191.605 10.9961   5
   0   5 -13 194.374 11.2135  15
   0  -5  13 173.537 11.7260  10
   0   5 -13 194.478 10.9814  16
   0   5  13 206.206 11.8219  17
   0   5  13 188.707 12.2911   4
   0   5  13 202.591 11.6927   2
   0   5  13 178.968 10.9027   7
   0   5  13 172.866 10.7401   3
   0   5  13 171.993 10.4332  12
   0   5  13 174.220 10.7186  13
   0  -5  13 178.237 12.2523   7
   0   5  13 164.605 10.6473   8
   0   5 -13 187.886 11.2623   3
   0   5 -13 196.523 12.0457  10
   0  -5  13 165.827 11.6757   4
   0  -5  13 179.435 10.9025  16
   0   5  13 176.661 11.4303  14
   0   5  14 1.00070 0.55152   8
   0   5 -14 4.20970 2.41862  10
   0   5  14 2.17767 1.24840   6
   0   5 -14 0.83139 1.68055   1
   0   5 -14 2.08327 1.97644   2
   0   5 -14 3.58001 1.50299   3
   0   5  14 2.04732 1.39801  15
   0  -5  14 0.86404 1.59056  15
   0  -5  14 0.87839 2.24118  10
   0  -5 -14 2.02418 1.22445   5
   0   5 -14 1.94907 1.11634  16
   0  -5  14 0.46752 2.44431   6
   0   5 -14 2.96307 1.38227   9
   0   5  14 4.15068 2.67331   4
   0  -5  14 0.62756 1.12433  16
   0   5  14 1.45848 1.13659   5
   0   5  14 2.00820 1.01456   7
   0   5  14 1.06101 0.83275  13
   0   5  14 3.56930 2.47146  10
   0  -5  14-2.02690 2.20586   4
   0   5 -14 3.69083 1.63234   8
   0   5  14 0.47166 2.04718   2
   0  -5  14 2.74760 2.45276   7
   0  -5 -14 1.74661 1.64735   2
   0   5  14 2.00573 1.57193  14
   0   5 -14 2.65331 1.44640  15
   0  -5  14 4.56592 1.96968   8
   0   5  14 0.27079 1.96170  17
   0   5 -15 102.399 7.37058   2
   0  -5  15 83.5150 7.08319   4
   0   5  15 106.812 6.47923   6
   0  -5  15 96.8465 7.39020  10
   0  -5  15 81.8330 7.80637   6
   0  -5  15 91.8820 6.74151  15
   0  -5  15 82.3246 6.86555   8
   0   5  15 91.9892 6.79447  14
   0  -5  15 92.8177 6.16957  16
   0   5 -15 99.4552 6.77427   1
   0   5 -15 107.241 6.66541   8
   0   5  15 91.5190 5.98982  13
   0   5  15 94.3650 5.94974  16
   0   5  15 106.136 6.22127   5
   0   5 -15 103.164 6.49500   9
   0  -5 -15 102.734 6.44504   5
   0   5 -15 103.434 6.27799  16
   0  -5 -15 87.4981 6.87921   2
   0   5 -15 93.7098 6.52735   3
   0   5  15 93.3012 6.54410  15
   0   5  15 108.719 7.31986  17
   0  -5  15 87.1095 7.61080   7
   0   5  15 90.2060 6.12985   7
   0   5 -15 96.6917 7.42915  10
   0   5  15 108.774 7.11259   2
   0   5  16 12.2962 1.91166  15
   0   5  16 15.1879 1.97974   6
   0   5  16 14.7082 1.67896   5
   0  -5  16 12.5718 1.60790  16
   0  -5  16 11.0686 2.45255   8
   0   5  16 15.2752 1.45138  13
   0  -5 -16 14.1658 2.43300   2
   0  -5  16 11.5411 2.30920  15
   0   5  16 15.0492 1.37250  16
   0   5 -16 10.7674 1.63730  16
   0   5 -16 12.2815 2.27599   1
   0  -5  16 16.2720 3.63091   6
   0  -5  16 15.4627 3.46489   7
   0   5 -16 16.7010 3.14364  10
   0  -5  16 9.79270 2.63637   4
   0   5  16 14.4182 1.63480   7
   0   5  16 10.8416 2.29685  14
   0  -5 -16 11.1827 1.81652   5
   0  -5  17 104.682 8.34166   6
   0   5  17 88.8997 6.79953  14
   0   5 -17 92.8541 7.42645  10
   0   5 -17 110.771 5.92727  11
   0   5  17 86.9313 5.81293  13
   0   5  17 102.011 6.37103   6
   0  -5 -17 83.4102 6.86947   2
   0   5 -17 94.1835 6.66591   1
   0   5 -17 88.8786 7.31912   2
   0  -5 -17 91.1573 6.22295   5
   0   5 -17 91.5344 6.04406  16
   0  -5  17 79.2568 6.67347   8
   0   5  17 83.4520 6.45575  15
   0  -5  17 88.0256 7.65659   7
   0  -5  17 85.8914 6.72835  15
   0   5 -18 21.4456 2.39842   5
   0  -5  18 16.4805 2.74248   8
   0   5  18 14.5728 1.57297  13
   0   5 -18 15.3461 2.47049   1
   0  -5  18 13.5572 3.59792   7
   0   5  18 8.26843 2.45797  14
   0  -5  18 11.6654 2.37806  15
   0   5 -18 7.23197 2.89529   2
   0   5 -18 14.3729 3.39114  10
   0  -5 -18 15.3426 2.94520   2
   0   5  18 11.9146 2.20811  15
   0   5 -18 14.7331 1.87559  16
   0   5 -19 75.0868 5.12042   5
   0   5  19 60.3252 5.20150  15
   0   5 -19 70.5827 5.40839   1
   0  -5  19 54.9052 6.27810   7
   0   5 -19 69.3489 6.31465   2
   0  -5  19 63.9253 5.43878  15
   0   5  19 63.7254 5.50084  14
   0   5 -19 65.9374 6.43005  10
   0   5  20-2.00056 2.46349  14
   0   5 -20 1.28526 1.79459   5
   0   5 -20-1.36631 3.02119   2
   0  -5  20-0.50405 3.40653   7
   0  -5  20 0.96622 2.31810  15
   0  -5  20 2.14207 2.31788  14
   0   5  20 1.59378 1.92212  15
   0  -5 -20-0.35764 2.64238   2
   0  -5  20-1.07755 2.27468   8
   0   5  21 19.7425 2.87332  15
   0  -5  21 22.3671 3.26301  14
   0   5 -21 13.0635 3.76930  10
   0  -5  21 18.4455 3.01887  15
   0   5  21 17.3147 3.21084  14
   0  -5 -21 10.5530 3.32237   2
   0  -5  21 11.4482 3.99024   7
   0   5 -21 22.3063 4.05527   2
   0   5 -22 1.05788 3.68340  10
   0  -5  22 2.40782 2.35488  14
   0  -5 -22 1.58566 2.91548   2
   0  -5  22-1.60680 3.57668   7
   0  -5  22 3.94871 2.64044  15
   0   5  22-0.37232 2.71015  14
   0   5  22 2.68795 2.32919  15
   0  -5  23 22.4372 4.88520   7
   0  -6   0 460.630 26.4395   6
   0   6   0 425.834 25.7410  15
   0   6   0 440.545 26.0909   1
   0  -6   0 454.469 25.8217  17
   0   6   0 456.808 26.4477   6
   0   6   0 434.005 26.4655   7
   0  -6  -1 2.02314 1.17965   6
   0   6   1 2.51778 1.39530   8
   0   6   1 1.37652 0.48238  14
   0   6  -1-0.19991 1.43178   7
   0  -6  -1 0.37423 0.56044  17
   0  -6   1 0.30863 0.71140  17
   0   6   1-0.18203 1.25331   7
   0  -6   1 0.76136 0.34618  14
   0   6  -1 1.32283 1.10337   3
   0   6  -1 0.18885 1.37449   6
   0   6   1 0.76781 0.89791   1
   0   6  -1 1.44950 1.23253   9
   0   6   1 0.96927 0.51592   4
   0   6   1-0.04761 0.51198  15
   0   6  -1 1.13951 0.49815  15
   0   6   1 0.99247 1.32465   6
   0   6   2 194.792 12.7117   6
   0   6   2 217.553 12.3410   4
   0   6   2 206.479 12.4939  17
   0   6  -2 214.585 12.8162   9
   0   6  -2 208.643 12.2314  15
   0   6   2 169.198 12.2227  14
   0   6   2 217.665 12.7410   3
   0   6   2 245.157 12.7216   5
   0  -6  -2 220.047 12.6826   6
   0   6   2 205.827 12.8466   7
   0   6   2 215.480 12.3961  16
   0  -6   2 205.923 12.5018  17
   0   6  -2 196.654 12.9810   7
   0   6   2 206.282 12.5007   1
   0   6  -2 198.380 12.7150   3
   0   6   2 203.997 12.7345   8
   0   6  -2 218.118 12.5754  10
   0  -6   2 212.730 12.1204  14
   0   6   2 204.699 12.7253   9
   0   6   3 29.7366 2.11194  16
   0   6  -3 32.2155 2.43356  10
   0   6   3 25.6633 2.44432   6
   0   6   3 26.1846 2.47660   3
   0  -6   3 25.5354 2.40002  17
   0   6   3 28.4251 2.22973   4
   0   6   3 30.7326 2.04366  14
   0   6   3 28.9331 2.52464   8
   0   6   3 27.8728 2.24333   1
   0   6   3 31.0050 2.46440   5
   0  -6  -3 27.8002 2.28460   6
   0   6   3 23.8948 2.40721   9
   0   6   3 30.8485 2.33880  17
   0  -6   3 27.5259 1.86113  14
   0  -6   3 28.7325 2.11150  16
   0   6  -3 27.2727 2.65759   8
   0   6  -3 30.3033 2.52336   3
   0   6  -3 29.0348 2.63743   9
   0   6   3 28.6658 2.59270   7
   0   6  -3 26.7019 1.97381  15
   0   6  -4 405.330 25.6601   8
   0   6   4 465.475 25.2152  16
   0   6  -4 423.627 25.1233  15
   0   6   4 411.258 25.5434   7
   0   6  -4 448.974 25.5139   1
   0   6   4 421.179 25.4799   6
   0  -6  -4 453.383 25.2986   6
   0   6   4 433.949 25.5267   3
   0   6  -4 420.403 25.5584   3
   0   6   4 448.466 25.4349   4
   0   6   4 450.203 25.4157  17
   0   6   4 416.156 25.1962  14
   0   6   4 401.634 25.4692   8
   0   6  -4 415.408 25.6393   9
   0   6   4 426.278 25.4716   5
   0   6   4 423.619 25.2560   1
   0   6   4 418.200 25.0401  15
   0   6  -4 460.240 25.4938  10
   0  -6   4 433.199 25.2296  15
   0  -6   4 411.531 25.6373  17
   0  -6   4 439.796 25.2056  16
   0   6   4 422.288 25.5014   9
   0   6   4 445.365 25.6343   2
   0  -6   4 400.217 25.0311  14
   0   6   4 475.500 25.5414  10
   0  -6   4 436.276 26.1345   7
   0   6  -5 6.88660 1.55642   9
   0   6   5 4.81919 1.27362   4
   0   6   5 6.38664 1.35207   3
   0   6  -5 6.67031 1.01050  16
   0   6   5 4.73162 1.42869   5
   0   6  -5 3.14088 1.25917   1
   0  -6   5 4.98902 0.75042  14
   0  -6   5 3.35383 1.58567   7
   0   6   5 3.72143 1.26818  10
   0   6  -5 6.65176 1.38494  10
   0   6   5 4.85231 1.26414   8
   0   6   5 4.14753 0.86874  16
   0   6  -5 4.81244 0.86887  15
   0   6   5 4.59450 1.18755   6
   0   6   5 5.53664 0.94605  14
   0  -6   5 4.98070 0.86267   4
   0   6  -5 4.84644 1.36427   3
   0   6  -5 2.73714 1.34264   8
   0   6   5 4.93454 0.69667  15
   0  -6   5 4.46365 1.56968   8
   0  -6   5 3.39653 0.92822  15
   0  -6  -5 5.59589 1.05044   7
   0   6   5 2.72325 1.10055  17
   0   6   5 4.28968 1.16520   9
   0   6   5 6.44535 1.50387   2
   0   6   5 5.85570 0.97251   1
   0   6   5 5.05131 1.30881   7
   0   6  -6 270.390 16.9500   9
   0   6  -6 269.458 16.8534   3
   0   6   6 270.057 16.7083   9
   0   6  -6 294.200 16.5845  16
   0   6  -6 277.652 17.3306   7
   0   6  -6 289.534 16.8988  10
   0   6   6 262.899 16.6978   6
   0   6   6 272.405 16.5822  14
   0   6  -6 286.162 16.4838  15
   0   6   6 272.831 16.3882  15
   0   6   6 293.220 16.9522   4
   0   6  -6 257.136 16.8102   1
   0   6   6 295.946 16.4546  16
   0   6   6 275.714 16.7731   3
   0  -6   6 260.781 17.5086   6
   0   6   6 300.992 16.9784   2
   0   6  -6 267.461 16.9645   8
   0   6   6 292.275 16.7989  17
   0  -6   6 298.185 16.5369   4
   0   6   6 312.811 16.9842  10
   0   6   6 247.162 16.6533   8
   0  -6   6 307.135 17.6172   7
   0   6   6 266.196 16.4391   1
   0   6   6 254.033 16.7092   7
   0  -6   6 264.084 16.8748   9
   0   6   6 275.259 16.7688   5
   0   6   7 51.8104 4.01134   4
   0   6   7 47.6110 3.51659  14
   0   6   7 49.5494 3.59701   8
   0  -6   7 55.3318 4.43398   7
   0   6   7 52.9905 3.69954   5
   0   6   7 50.6966 3.60346   9
   0  -6   7 48.8310 3.38584  16
   0   6   7 47.6060 3.62957   3
   0  -6   7 53.7784 4.60464   6
   0   6  -7 51.5326 3.41684  15
   0  -6   7 54.5830 3.89624   9
   0   6   7 52.1468 3.95429  10
   0   6  -7 40.7101 3.69324   1
   0   6   7 47.3731 3.62751   7
   0   6  -7 48.4625 3.87450   9
   0  -6   7 51.0916 3.53869   4
   0   6  -7 49.9097 3.44251  16
   0   6   7 48.3568 3.30048  15
   0   6   7 48.1334 3.59746   6
   0   6  -7 49.1994 3.79929   3
   0   6   7 46.6070 3.28621   1
   0   6  -7 51.8992 4.29309   7
   0   6  -7 50.4433 3.90685  10
   0   6  -7 58.5916 4.02281   8
   0   6   7 53.0977 3.77687  17
   0   6   7 51.1606 3.91313   2
   0   6   7 51.2255 3.19559  13
   0   6   8 109.784 7.61855   7
   0   6   8 114.020 7.64716  14
   0   6  -8 118.367 7.58719  13
   0   6   8 100.415 7.52877   8
   0  -6   8 120.650 8.75480   6
   0   6   8 117.175 7.58820   9
   0   6   8 122.369 7.27298  13
   0   6  -8 114.316 7.92718   9
   0   6  -8 125.022 8.04218   8
   0  -6   8 121.063 8.26585   8
   0   6  -8 127.786 8.07946  10
   0  -6   8 115.946 8.48333   7
   0   6   8 106.668 7.29426   1
   0   6   8 124.147 7.69556   6
   0   6   8 125.159 7.91120  17
   0   6   8 121.682 7.73307   5
   0   6  -8 120.102 7.51158  15
   0   6   8 118.521 7.70358   3
   0   6  -8 113.730 7.83749   1
   0   6   8 118.813 7.43469  15
   0   6   8 124.054 8.16352   4
   0   6  -8 129.148 7.91174   3
   0   6   8 160.867 7.43845  11
   0  -6   8 127.532 7.49386  16
   0   6   8 128.391 8.10694  10
   0   6   8 124.786 8.02826   2
   0  -6   8 113.035 7.65350   4
   0   6  -8 126.684 7.55339  16
   0   6   9 12.3015 1.17138  11
   0   6   9 8.42866 1.43444   7
   0   6   9 6.71359 1.28143   8
   0  -6   9 7.33594 1.91571   8
   0   6   9 8.15133 1.17747  15
   0   6   9 7.39043 0.83269   1
   0   6   9 9.98761 1.47401   5
   0   6   9 5.82906 1.24755   9
   0   6  -9 4.40604 1.52771   1
   0  -6   9 5.65614 1.70802  10
   0   6   9 8.52460 1.67752  17
   0   6   9 8.28440 0.88882  13
   0  -6   9 9.60573 2.39148   7
   0   6   9 6.39519 1.46101  14
   0   6  -9 6.86093 1.56767   3
   0   6  -9 11.5362 1.93587   8
   0   6   9 9.39054 2.07229   4
   0   6   9 6.17603 1.73153   2
   0   6   9 7.87926 1.38607   6
   0  -6   9 9.47807 1.27543  16
   0   6  -9 7.65922 1.31742  13
   0  -6   9 5.66929 1.44132   4
   0   6  -9 6.83750 1.23621  15
   0   6  -9 7.65071 1.73913   9
   0  -6   9 8.68576 1.43599  15
   0  -6   9 7.44388 2.33656   6
   0   6   9 11.3344 2.06319  10
   0   6  -9 10.0549 1.25292  16
   0   6  -9 9.21067 1.97720  10
   0   6   9 7.11364 1.30056   3
   0   6 -10 115.648 7.13483  13
   0   6  10 101.386 7.00008  15
   0   6 -10 102.058 7.61509  10
   0   6 -10 113.951 7.53147   8
   0   6  10 99.6701 6.99201   8
   0   6 -10 116.661 7.11800  15
   0   6  10 148.506 6.89768  11
   0   6  10 125.902 8.05355   4
   0   6 -10 115.439 7.08276  16
   0   6 -10 107.645 7.39817   3
   0  -6  10 106.693 7.28582  15
   0   6  10 109.113 6.99628   9
   0  -6  10 97.8436 8.25513   6
   0   6  10 97.2370 7.20866  14
   0   6  10 111.037 7.11997   3
   0  -6  10 109.872 7.82613   8
   0  -6  10 110.433 6.99410  16
   0   6 -10 106.307 7.42448   1
   0  -6  10 97.9668 7.51612  10
   0   6  10 114.197 7.53859  17
   0   6  10 98.6655 7.10147   6
   0   6  10 118.433 6.77845  13
   0   6  10 104.720 7.10479   7
   0   6 -10 109.275 7.48419   9
   0   6  10 121.488 7.65091   2
   0  -6  10 100.941 7.36809   4
   0   6  10 117.429 7.21567   5
   0   6  10 118.226 7.83056  10
   0   6 -11 1.05015 0.95535  16
   0   6  11 3.00883 2.20081   4
   0   6  11 1.44367 0.97180   8
   0  -6  11 1.96181 1.08556  16
   0  -6  11-0.84159 2.17643   6
   0  -6  11 1.33851 1.75394   8
   0  -6  11 0.72052 1.10979  15
   0   6  11 1.97870 1.69809   2
   0   6  11 1.96401 1.25817  14
   0   6 -11 1.04903 1.87809  10
   0   6 -11 0.65485 1.05855  13
   0   6 -11 0.20314 1.43117   1
   0   6  11 1.01754 1.04116  15
   0   6  11-0.69146 1.18243   6
   0   6  11 1.09796 1.56425  17
   0   6  11 0.67817 0.65920  13
   0   6  11 0.88730 1.18270   7
   0   6  11-0.22610 1.01729   3
   0   6 -11 2.23565 1.61325   8
   0  -6  11 0.61791 1.49917   4
   0   6 -11 0.72308 1.46645   3
   0   6  11-0.13396 1.27351   5
   0   6  11 0.61397 0.80071   9
   0   6  11 1.06181 2.04038  10
   0  -6  11 0.94563 1.67464  10
   0   6  11 1.28401 0.66746  11
   0   6 -11 3.05974 1.18008  15
   0   6 -11-0.77834 1.54461   9
   0   6 -12 198.781 12.3507   3
   0   6  12 190.674 11.7371   9
   0   6  12 218.217 12.6962   2
   0  -6  12 165.911 12.3820   4
   0   6  12 218.113 11.9597   3
   0   6  12 213.278 12.1310   5
   0   6  12 226.748 12.7784  17
   0   6 -12 199.715 12.1269  15
   0   6 -12 211.048 12.0497  16
   0   6 -12 205.715 12.5257   1
   0   6  12 181.921 12.3017  14
   0   6  12 182.552 11.8144   8
   0  -6  12 188.655 12.3510  15
   0  -6  12 182.456 12.7489   8
   0   6  12 183.898 11.9800   7
   0   6  12 211.607 12.9462  10
   0   6  12 195.870 11.7073  13
   0  -6  12 197.013 13.6124   6
   0   6  12 186.546 12.0532  15
   0   6  12 222.409 13.2729   4
   0   6  12 192.866 12.1067   6
   0  -6  12 191.507 11.9161  16
   0   6 -12 209.133 12.1347  13
   0  -6  12 193.570 12.6977  10
   0   6 -12 194.743 12.4141   8
   0   6 -12 205.423 12.4306   9
   0   6 -12 192.255 12.8454  10
   0   6  13 5.82789 1.34761   7
   0   6  13 6.14692 0.95913  13
   0  -6  13 3.78614 2.82914   6
   0   6 -13 3.43255 1.80092   3
   0  -6  13 13.6047 3.19050   7
   0   6  13 8.50632 1.48637  15
   0   6  13 6.09565 1.45822   6
   0   6  13 4.62682 2.61670   4
   0   6 -13 6.01579 1.89753   1
   0  -6  13 6.05859 2.10018  10
   0  -6  13 5.87541 1.31874  16
   0  -6  13 3.65569 1.90364   8
   0   6 -13 8.09154 1.40502  16
   0   6  13 6.36785 0.88567   9
   0   6  13 6.96437 1.05381   8
   0   6  13 7.38304 1.20898   3
   0   6 -13 6.83760 1.40482  15
   0  -6  13 5.75777 2.08159   4
   0   6  13 5.06612 2.17885   2
   0   6 -13 4.29447 2.29793  10
   0   6  13 9.08917 1.47767   5
   0   6 -13 5.44406 1.70987   9
   0   6  13 7.77400 1.72393  14
   0   6 -13 9.57000 2.01838   8
   0   6  13 9.60867 2.76335  10
   0   6  13 5.15041 2.13936  17
   0  -6 -13 6.67498 1.88375   2
   0   6 -14 111.487 6.83640  16
   0   6  14 110.215 6.85493   5
   0   6  14 98.4415 6.77199   7
   0   6  14 127.287 8.39926   4
   0   6 -14 103.823 7.85618  10
   0  -6 -14 107.098 7.50480   2
   0  -6 -14 128.176 7.07682   5
   0  -6  14 103.150 7.30014  15
   0   6  14 102.432 6.21157  12
   0   6  14 123.642 7.78853  17
   0   6 -14 112.504 7.82221   2
   0  -6  14 111.900 7.76398   8
   0   6 -14 106.500 7.19799   3
   0   6  14 110.385 7.54615   2
   0   6  14 93.9037 6.39372   8
   0   6  14 105.881 7.02415  15
   0   6 -14 118.551 7.37162   8
   0   6  14 104.014 6.50841  13
   0  -6  14 93.1857 7.40995   4
   0  -6  14 97.4344 6.70633  16
   0   6  14 97.7306 7.21665  14
   0   6  14 109.186 7.96985  10
   0  -6  14 107.146 7.73004  10
   0   6  14 114.195 6.99830   6
   0  -6  14 116.443 8.70189   6
   0  -6  14 99.4737 8.31909   7
   0   6 -14 104.873 7.40317   1
   0   6 -14 117.103 7.09991  15
   0   6 -14 115.634 7.23136   9
   0   6  14 109.294 6.59900   3
   0  -6  15 5.04165 2.28973   4
   0   6  15 1.83737 1.39610  15
   0   6 -15 1.60723 1.74356   3
   0  -6  15 0.72401 1.67555  15
   0   6 -15 4.45956 1.66216   8
   0   6 -15 7.09196 2.41471   2
   0   6  15 4.93841 1.32166   5
   0  -6  15 2.69613 3.02656   7
   0  -6  15 3.81126 2.19942   8
   0   6  15 0.24372 1.77765  14
   0   6 -15 3.73421 1.34660  16
   0   6  15 4.24527 1.53350   6
   0   6  15 3.79170 0.50380   8
   0   6  15 5.89116 1.01963  13
   0  -6 -15 4.88683 1.44861   5
   0   6  15 2.61738 2.16917   2
   0   6 -15 5.98726 2.39068  10
   0  -6  15 8.97210 3.53015   6
   0  -6 -15 4.16233 2.14387   2
   0   6 -15 4.15326 2.02631   1
   0   6  15 3.42631 1.27967   7
   0   6  16 65.4045 4.36938   5
   0   6  16 58.9767 4.07727  13
   0   6 -16 70.0665 5.83370  10
   0  -6  16 63.1587 5.01531  15
   0  -6  16 67.8248 6.17993   7
   0   6 -16 67.9830 5.72204   2
   0  -6  16 61.8764 6.58607   6
   0  -6 -16 64.5034 4.57768   5
   0  -6 -16 54.3089 5.07055   2
   0   6  16 69.4061 4.65273   6
   0   6  16 54.3520 4.65760  15
   0   6  16 57.7589 5.01465  14
   0  -6  16 61.5540 5.32950   8
   0   6 -16 68.8265 5.18135   1
   0   6 -16 65.0924 4.48789  16
   0   6 -17 4.73350 2.14165   1
   0  -6  17 2.42157 2.46244   8
   0  -6  17 4.10860 3.31348   6
   0  -6 -17 2.48275 2.11993   2
   0   6 -17 1.56457 2.32597   2
   0  -6  17 4.86782 3.19443   7
   0   6  17 2.87964 0.98607  13
   0  -6  17 4.96783 2.13043  15
   0   6  17 4.29761 1.63239  15
   0   6 -17 6.80852 2.87422  10
   0   6  18 53.2973 5.10395  14
   0  -6  18 64.6315 6.33598   7
   0   6 -18 58.7912 5.80670   2
   0   6  18 55.4455 4.71452  15
   0  -6  18 68.4172 6.78940   6
   0   6 -18 68.6154 6.05065  10
   0   6  18 62.4775 4.02323  13
   0  -6  18 60.7569 5.25380   8
   0  -6 -18 48.4680 5.21529   2
   0   6 -18 59.8800 5.07206   1
   0   6 -18 62.7968 4.38164  16
   0  -6  19 12.4176 2.72198  15
   0   6 -19 14.3865 1.95997  16
   0   6 -19 11.1734 2.67862   1
   0   6 -19 15.8262 3.77516  10
   0  -6 -19 16.5647 3.21212   2
   0   6  19 14.2265 2.79733  14
   0  -6  19 14.2041 4.22861   6
   0  -6  19 12.8685 2.93170   8
   0   6 -19 16.9961 2.52408   5
   0   6 -19 21.8550 3.74114   2
   0  -6  19 11.5103 3.83753   7
   0   6 -20 15.6352 2.61455   5
   0  -6 -20 20.3259 3.40818   2
   0  -6  20 17.1247 3.08665  15
   0  -6  20 13.4642 2.81459   8
   0   6  20 13.8417 2.73442  15
   0  -6  20 17.5991 4.82565   6
   0  -6  20 12.4178 3.92958   7
   0   6 -20 28.1807 4.57237  10
   0   6  20 15.0981 3.00707  14
   0   6 -20 11.3378 3.74236   2
   0   6  21-0.35407 2.40755  14
   0  -6  21 2.21627 3.50889   7
   0  -6  21 0.34637 2.22389  15
   0   6 -21 0.99975 2.93765   2
   0  -6 -21-0.38102 2.95528   2
   0   6 -22 32.2794 5.13624  10
   0  -6  22 29.0039 5.10806   7
   0   6  22 26.5037 3.44249  15
   0   7   0-0.36973 1.27203   8
   0   7   0 0.40550 1.58704   6
   0   7   0-1.10279 1.11283   1
   0  -7   0 0.73234 1.08457   9
   0  -7   0 0.11172 0.62534  17
   0  -7   0 0.66417 1.31147   8
   0   7   0-0.05005 0.52693  15
   0   7   0 0.22030 1.50691   7
   0  -7  -1 225.891 13.9430   8
   0   7  -1 226.250 13.9688   6
   0   7   1 214.610 13.4949   1
   0   7   1 203.606 13.6900   8
   0   7   1 244.055 13.6755   5
   0  -7   1 216.208 13.1873  17
   0   7   1 218.094 13.9052   7
   0   7   1 209.705 13.0779  15
   0  -7   1 222.767 14.0158   8
   0   7   1 216.940 13.6978   3
   0   7  -1 241.909 13.5141  10
   0   7  -1 219.462 14.0205   7
   0  -7  -1 230.913 13.1101  17
   0  -7   1 220.129 14.1118   7
   0   7   1 206.648 13.7860   6
   0   7   1 227.923 13.0533  14
   0   7  -1 218.375 13.0861  15
   0   7  -1 211.334 13.5440   1
   0  -7  -1 257.910 13.8721   9
   0  -7   1 259.085 13.9350   9
   0   7   1 201.433 13.6821   9
   0   7   2 14.3748 1.92764   6
   0   7   2 13.5932 2.04102   7
   0   7  -2 11.8338 1.54429  10
   0   7   2 11.4747 1.05132  14
   0   7   2 13.0886 1.75740   5
   0   7   2 13.8094 1.89610   3
   0  -7  -2 14.4139 1.80943   9
   0  -7  -2 13.5481 1.91495   8
   0   7   2 12.7591 1.40474  16
   0  -7   2 10.3868 0.81579  14
   0   7   2 12.7220 1.51901   1
   0  -7   2 16.1086 1.83638   9
   0   7  -2 13.8890 1.39794  16
   0   7  -2 11.4303 1.05417  15
   0  -7   2 10.7388 1.30422  17
   0   7  -2 13.5179 1.90834   9
   0  -7   2 13.5926 2.24528   7
   0   7   2 12.7987 1.18005   4
   0   7   2 9.33804 1.72511   9
   0   7  -2 14.0847 1.90204   3
   0  -7   2 8.26710 1.85334   8
   0   7   2 9.36156 1.80743   8
   0   7  -2 9.27170 2.00223   7
   0   7   2 10.0967 1.39266  17
   0   7   3 297.681 18.7851   1
   0   7   3 299.311 18.5424  14
   0   7  -3 335.610 19.1631   3
   0   7   3 296.208 19.0503   6
   0   7  -3 292.437 19.1541   8
   0  -7   3 333.829 19.2519   9
   0   7   3 327.230 19.0158   5
   0  -7  -3 346.851 19.2873   8
   0   7   3 321.791 18.6988  16
   0   7   3 325.812 18.8306  17
   0   7  -3 323.859 18.7729  16
   0   7  -3 318.808 19.4752   7
   0  -7  -3 341.790 18.9280   6
   0   7  -3 318.293 18.5136  15
   0  -7   3 335.290 19.6899   7
   0   7   3 304.994 19.0505   9
   0  -7   3 286.749 18.8132  17
   0   7   3 280.287 19.1336   7
   0   7  -3 328.073 18.9063  10
   0  -7   3 307.289 18.3607  14
   0   7   3 359.819 18.9740  10
   0   7   3 322.553 19.0921   3
   0   7   3 296.484 19.0505   8
   0  -7   3 338.981 19.4926   8
   0   7   3 326.386 18.6903   4
   0   7  -3 290.982 19.1073   9
   0   7   4 6.52602 1.27822  17
   0   7   4 10.3196 1.70739   2
   0   7   4 6.51206 1.50520   8
   0   7   4 7.46018 1.54055   6
   0   7  -4 5.90480 1.56086   3
   0   7   4 5.96685 1.49243   5
   0   7  -4 5.89998 1.15495  16
   0  -7   4 5.78689 1.50163  17
   0   7   4 7.62644 0.99537  14
   0   7  -4 6.06302 0.82446  15
   0   7  -4 5.76853 1.65292   9
   0   7   4 5.68783 1.54359   3
   0  -7   4 8.27512 1.76938   8
   0  -7   4 6.84337 2.03661   7
   0  -7  -4 8.47032 1.17284   6
   0   7   4 6.09522 1.16972  16
   0  -7   4 5.48021 1.90500   6
   0  -7   4 3.31987 1.44452   9
   0   7  -4 9.78805 1.51843  10
   0   7   4 6.43852 0.77529  15
   0   7   4 7.56276 1.31102   4
   0   7  -4 3.57073 1.95275   7
   0   7   4 6.91731 1.65027   7
   0  -7   4 7.60477 0.75435  14
   0   7   4 6.96091 1.16827   1
   0   7   4 8.37871 1.64886   9
   0   7   4 8.15722 1.49849  10
   0   7  -4 4.87404 1.55078   8
   0   7   5 135.312 9.27356   7
   0   7   5 131.463 9.16182   8
   0   7  -5 141.305 9.42656   8
   0  -7   5 144.039 8.87076  16
   0   7   5 155.597 9.29825   5
   0   7   5 146.034 8.93576   1
   0   7   5 150.443 9.24945  10
   0   7  -5 145.743 8.76917  15
   0  -7   5 152.022 10.0335   6
   0   7  -5 144.679 9.00014  13
   0  -7   5 146.552 10.0005   7
   0   7   5 130.696 9.12331   6
   0   7  -5 146.730 8.96585  16
   0   7  -5 156.087 9.24312  10
   0  -7   5 148.636 8.66115  14
   0  -7   5 151.967 9.73994   8
   0   7   5 151.583 8.88463  16
   0   7   5 159.883 9.43640   2
   0  -7   5 140.064 9.36937  17
   0   7   5 136.688 9.08635  17
   0   7  -5 136.189 9.36411   9
   0   7   5 141.138 8.66502  15
   0   7  -5 149.707 9.27072   1
   0   7  -5 135.648 9.28824   3
   0   7   5 137.891 9.19335   9
   0   7   5 165.343 9.24366   4
   0   7   5 148.377 9.27748   3
   0   7   5 138.598 8.85865  14
   0   7   6 0.20821 0.60197  15
   0   7  -6 0.42706 0.72413  15
   0  -7   6 1.00066 1.94435   6
   0   7   6 0.15782 1.18962   8
   0   7   6 1.03484 1.39834   4
   0  -7   6-0.49968 0.87690   4
   0   7   6 0.47390 1.19659   9
   0   7  -6 1.10921 1.35895   3
   0   7   6-0.83406 1.36386   3
   0  -7   6 0.66164 1.78049   7
   0  -7   6 0.20177 0.61898  14
   0   7  -6 0.63571 1.41461   8
   0   7  -6-0.20713 1.47472   9
   0   7  -6-0.11668 0.87529  16
   0   7   6-0.62635 1.29617   6
   0   7  -6-0.90152 1.51056   1
   0   7  -6 1.36354 1.35826  10
   0   7   6-0.16423 1.30304   5
   0   7   6 0.17170 1.26218   7
   0   7   6 0.38206 1.43997   2
   0   7   6 0.10141 0.94847   1
   0   7   6 0.15587 1.22015  17
   0   7   6 1.58063 1.37479  10
   0   7   6 1.57920 0.93755  14
   0   7   6-0.09122 0.82275  16
   0   7  -7 136.801 8.25177  16
   0   7   7 127.653 8.37568   8
   0   7  -7 132.031 8.10351  15
   0   7   7 119.369 8.41107   7
   0   7   7 128.249 8.09123   1
   0   7   7 122.193 8.36327   6
   0   7  -7 135.190 8.61330  10
   0   7   7 122.889 7.98575  15
   0  -7   7 122.180 9.31366   7
   0   7   7 135.618 8.70967   2
   0  -7   7 130.805 8.13002   4
   0   7   7 122.728 8.35078   9
   0   7  -7 124.903 9.02425   7
   0   7   7 133.496 8.49965  17
   0   7   7 139.443 8.67015  10
   0  -7   7 139.111 9.50542   6
   0   7  -7 126.816 8.59029   1
   0   7   7 143.996 8.13381  16
   0   7  -7 123.625 8.66101   9
   0   7   7 146.996 8.74737   4
   0   7   7 141.011 8.55223   5
   0   7   7 140.962 8.53538   3
   0   7  -7 146.097 8.82877   8
   0   7  -7 133.317 8.63071   3
   0   7   7 117.838 8.20146  14
   0   7   7 139.460 7.95731  13
   0   7   8 16.5461 2.20332   2
   0  -7   8 12.4116 1.52463  16
   0   7   8 11.8022 1.65609   8
   0   7   8 10.0635 1.79522   6
   0   7   8 15.7824 1.88264   5
   0   7   8 15.7548 2.22532   4
   0   7  -8 11.3391 2.07919   3
   0  -7   8 11.2899 2.64689   7
   0   7   8 9.95888 1.29980   1
   0   7  -8 10.2463 2.02647   9
   0   7   8 12.4819 1.31469  15
   0   7   8 15.1586 1.23230  13
   0  -7   8 12.4010 1.58211   4
   0   7   8 14.8474 1.87865   3
   0   7   8 13.3213 1.72074   9
   0   7   8 14.5544 2.07269  10
   0   7   8 16.8967 1.99962  17
   0   7  -8 15.4151 1.62927  16
   0   7   8 11.4950 1.36747  16
   0   7  -8 13.0440 2.08026  10
   0   7  -8 15.2867 1.49550  15
   0   7   8 10.1255 1.75151   7
   0   7   8 15.5230 1.40696  11
   0   7  -8 16.8844 2.63794   7
   0   7  -8 11.8721 1.95094   1
   0   7   8 12.4197 1.63795  14
   0  -7   8 14.0595 2.81023   6
   0   7  -8 12.6253 2.14250   8
   0   7   9 118.578 8.40988   6
   0  -7   9 131.708 8.48608  15
   0   7  -9 134.539 8.31682  16
   0  -7   9 123.537 9.45424   7
   0   7  -9 132.623 8.22390  15
   0  -7   9 119.682 9.55735   6
   0   7   9 147.554 8.76962  17
   0   7   9 122.403 8.41512   7
   0   7   9 132.234 7.97442  13
   0   7   9 142.006 9.03805   4
   0   7  -9 122.613 8.67173   1
   0   7   9 128.977 8.42692  14
   0   7   9 133.966 8.79605   2
   0   7   9 143.601 8.96361  10
   0  -7   9 128.262 9.13202   8
   0   7  -9 135.361 8.70682   3
   0   7   9 120.682 8.32201   8
   0   7   9 123.471 8.12839  15
   0  -7   9 129.581 8.20049  16
   0   7   9 180.060 8.23503  11
   0   7   9 132.051 8.47039   3
   0   7  -9 137.720 8.92709  10
   0  -7   9 131.043 8.36744   4
   0   7   9 131.747 8.11865  16
   0   7   9 137.414 8.52610   5
   0   7   9 125.577 7.99618   1
   0   7  -9 131.130 8.35112  13
   0   7  -9 132.022 8.79150   8
   0   7   9 126.707 8.33554   9
   0   7  -9 138.013 9.00797   2
   0   7  -9 128.050 8.76151   9
   0   7  10 0.83508 1.93774   4
   0  -7  10 1.28646 2.21732   6
   0  -7  10 0.22013 1.06787  16
   0   7 -10 0.65678 1.81211   9
   0   7  10-1.01008 1.71699  10
   0  -7  10-0.16104 1.40163   4
   0   7 -10 0.12856 1.13527  16
   0   7  10 0.19238 0.69025  13
   0   7  10-1.14556 1.80963   2
   0  -7  10 0.39739 2.31638   7
   0   7  10 0.79257 1.15393   8
   0   7  10 0.43135 1.54393  17
   0   7  10-1.06990 1.25479   7
   0   7  10 0.15201 1.18445   3
   0   7  10-0.87422 1.05041   9
   0   7 -10-1.47991 1.82235  10
   0   7  10-0.99842 0.92635  16
   0   7 -10-0.22428 1.69880   8
   0  -7  10 0.58976 1.89319   8
   0   7  10-1.17187 1.28030  14
   0   7 -10-1.20856 1.75315   3
   0   7  10 1.25774 1.28536   5
   0  -7  10-0.17210 1.11978  15
   0   7  10 1.47102 0.97760  15
   0   7  10 0.09502 1.12798  11
   0   7 -10 2.17940 1.56014   1
   0   7 -10 0.13807 1.08563  13
   0   7  10 0.05123 0.57096   1
   0   7  10 0.96685 1.28970   6
   0   7 -10 0.61664 0.98706  15
   0   7  11 81.8894 5.36365   5
   0   7  11 74.5921 4.82005  13
   0   7  11 88.6872 4.90931  11
   0   7 -11 78.1497 5.64108   3
   0   7 -11 84.3463 5.26462  16
   0   7  11 66.4303 5.33716  14
   0   7 -11 73.7930 5.65248   9
   0  -7  11 74.4853 5.10712  16
   0   7  11 88.4769 6.14865  10
   0  -7  11 76.6759 5.47674   4
   0   7  11 80.0819 5.17968  15
   0  -7  11 75.5074 5.44182  15
   0  -7  11 77.6872 6.16865   8
   0  -7  11 75.8547 6.71567   6
   0   7  11 83.4925 5.84210  17
   0   7 -11 75.6660 5.92380  10
   0   7 -11 74.7873 5.17418  15
   0   7  11 68.4866 5.09330   8
   0   7  11 66.3143 5.22743   7
   0   7  11 80.8348 5.28759   3
   0   7  11 84.6756 5.95225   2
   0   7  11 74.2093 5.10803   9
   0   7 -11 82.8004 5.77252   1
   0   7  11 74.3230 5.32531   6
   0   7  11 75.0710 6.15894   4
   0   7 -11 85.1774 5.83709   8
   0   7 -12 29.2538 3.45688  10
   0   7  12 24.6315 3.54543   4
   0  -7  12 26.1748 2.85438   4
   0   7  12 33.6148 2.89672  14
   0   7  12 28.5648 1.99069  11
   0   7 -12 34.2979 3.10810   8
   0  -7  12 28.3466 3.29787  10
   0   7  12 25.4484 2.21275   9
   0   7  12 23.2406 2.36103  15
   0   7 -12 28.5429 3.00789   9
   0   7 -12 26.6945 2.50022  16
   0  -7  12 28.0467 2.79596  15
   0   7  12 28.6040 2.03810  13
   0   7  12 28.1615 2.45152   3
   0   7  12 27.7899 2.62926   6
   0   7  12 24.7553 2.29149   8
   0  -7  12 32.6217 4.34964   6
   0  -7  12 25.0618 3.34702   8
   0   7  12 24.7234 2.49929   7
   0   7 -12 32.1729 3.11829   1
   0   7  12 25.0675 2.59099   5
   0   7  12 27.9899 3.12593  17
   0  -7  12 23.2670 2.30001  16
   0   7 -12 32.3037 3.03153   3
   0   7  12 25.8978 3.13030   2
   0   7 -12 28.8155 2.49962  15
   0   7  12 34.7572 3.67721  10
   0   7 -13 66.5992 4.70718  16
   0   7 -13 66.5967 4.74625  15
   0   7  13 66.6147 4.73255  15
   0   7  13 69.1019 5.42172   2
   0   7 -13 73.3614 5.37683   1
   0   7  13 64.9342 5.00573  14
   0   7  13 73.1741 4.60466   3
   0   7  13 66.1921 4.35204   9
   0   7  13 64.6906 4.69058   7
   0   7  13 71.8260 6.02722   4
   0  -7  13 71.7437 5.64377   8
   0   7  13 73.2257 4.80899   5
   0   7  13 60.6327 4.80610   6
   0   7 -13 72.0896 5.70226  10
   0   7  13 69.2029 5.41491  17
   0  -7  13 69.3406 5.04790  15
   0   7 -13 65.9240 5.11566   9
   0   7  13 87.8774 6.05512  10
   0   7  13 63.1719 4.25889  13
   0  -7  13 67.8510 6.47960   6
   0   7  13 62.9072 4.42051   8
   0   7 -13 62.8892 5.06507   3
   0  -7  13 65.3958 5.52111  10
   0  -7  14 20.9798 2.46380  15
   0   7  14 16.5307 1.49341  13
   0   7 -14 16.3247 2.94714  10
   0   7  14 13.4682 2.83621  17
   0   7  14 18.7945 1.74814   3
   0   7  14 19.9766 2.04966   5
   0   7  14 16.0093 1.41561   9
   0  -7  14 17.6879 3.05689  10
   0   7 -14 19.0682 2.49020   3
   0   7  14 13.3106 1.93620   7
   0   7 -14 11.6664 1.93541  16
   0  -7  14 16.1435 3.10804   8
   0   7  14 15.1395 1.51229   8
   0   7  14 11.0336 1.87805  15
   0   7  14 11.4057 2.06542   6
   0  -7  14 20.2709 3.76143   6
   0   7  14 17.7127 2.41758  14
   0  -7  14 20.6570 3.81893   7
   0   7 -14 12.1860 2.38198   9
   0   7 -14 17.8948 2.69774   1
   0   7  14 18.3105 2.93747   2
   0  -7  15 52.8531 4.70285  15
   0   7  15 59.2588 4.71979  14
   0   7  15 49.4362 4.32507   6
   0   7 -15 56.4009 4.78548   1
   0   7  15 57.7423 4.38582  15
   0   7 -15 65.2018 5.46021  10
   0   7 -15 60.2637 4.23432  16
   0   7  15 57.0151 3.80175  13
   0   7  15 61.2259 4.25916   5
   0  -7  15 49.9657 5.94452   6
   0  -7  15 52.6624 5.81776   7
   0  -7  15 64.7536 5.39527   8
   0   7 -16 1.14166 2.60310  10
   0   7 -16-0.15292 1.45265  16
   0  -7  16 0.66825 2.61544   8
   0   7 -16-0.84054 2.12224   1
   0   7  16-0.26392 1.75078  14
   0  -7  16-2.94727 3.11078   6
   0  -7  16 6.06385 3.47705   7
   0   7  16-0.98057 1.52815  15
   0   7  17 22.3146 1.91560  13
   0  -7  17 23.4991 4.55626   6
   0  -7  17 25.0746 4.52746   7
   0  -7  17 21.6184 3.50546   8
   0   7 -17 18.6902 3.73360   2
   0   7  17 23.4082 2.64645  15
   0   7 -17 25.4355 2.48636  16
   0   7  17 21.9583 3.07222  14
   0   7 -17 25.4999 3.21154   1
   0   7 -17 22.9927 3.75872  10
   0  -7  17 25.6835 3.11440  15
   0  -7  18 1.94168 3.59005   6
   0   7 -18 5.99868 2.51370   1
   0  -7  18 3.25045 3.62395   7
   0   7 -18 3.42778 3.09279  10
   0  -7  18 2.72361 2.53902   8
   0   7 -18 4.19564 1.65921  16
   0   7  18 4.79403 2.38868  14
   0   7 -18 5.22472 3.07452   2
   0  -7  18 5.97867 2.49543  15
   0  -7  18 2.57244 1.90538  14
   0   7 -19 24.0305 4.27129  10
   0   7 -19 29.4615 4.27383   2
   0  -7  19 21.8850 3.62698   8
   0  -7  19 30.4526 5.40850   6
   0   7  19 25.0566 2.99504  15
   0  -7  19 27.8622 4.77445   7
   0   7 -19 30.6947 2.75916  16
   0  -7  19 18.2835 3.19112  15
   0   7  19 20.3605 3.46725  14
   0   7 -19 33.2661 3.74839   1
   0   7 -20 0.47817 3.33161  10
   0  -7  20 8.60914 4.17738   7
   0   7  20 0.67254 2.46292  14
   0   7  20 2.81518 1.99901  15
   0   7 -20 2.71217 2.18950   5
   0   7  21 34.7147 3.83788  15
   0  -7  21 45.8459 6.08339   7
   0   7 -21 34.6971 5.15752  10
   0  -8   0 143.993 8.49734  17
   0   8   0 152.325 9.48879   6
   0   8   0 137.627 8.49820  15
   0   8   0 146.413 9.37051   8
   0  -8   0 155.209 9.65265   8
   0  -8   0 151.560 9.68289   7
   0   8   0 145.929 9.57893   7
   0   8   0 133.232 9.04783   1
   0  -8  -1 0.74099 1.50928   8
   0   8   1-0.78124 1.73734   3
   0   8   1-0.23882 1.71918   7
   0   8   1 2.03576 1.54981   9
   0   8  -1 3.58433 2.01342   7
   0  -8   1 0.05846 0.64213  17
   0   8   1-0.20495 1.45953   8
   0  -8   1 1.05443 1.73788   8
   0   8  -1 1.27946 1.57587   8
   0   8  -1 0.16730 1.27992   1
   0   8   1 0.25213 0.59481  15
   0   8   1-0.43450 1.61365   6
   0  -8   1-0.28308 1.66393   7
   0  -8  -1 1.72182 1.57956   7
   0   8   1 0.46427 1.30717   1
   0   8   1-0.57905 1.06263  16
   0   8  -1 0.90150 0.58246  15
   0   8   1 4.09008 1.43939   5
   0   8  -1 2.26343 1.17623  10
   0  -8  -2 311.067 17.8223   8
   0  -8   2 301.209 17.9726   6
   0   8  -2 282.161 17.5438   3
   0   8  -2 300.887 17.2482  10
   0   8   2 271.157 17.6490   7
   0   8   2 301.527 17.5766   3
   0   8   2 278.690 16.7763  15
   0  -8  -2 293.115 17.6792   7
   0  -8   2 308.763 17.9590   8
   0   8   2 279.988 16.7752  14
   0   8   2 277.589 17.5542   6
   0  -8   2 264.430 16.9145  17
   0   8   2 292.042 17.5531   8
   0   8   2 312.051 17.4603   5
   0   8  -2 286.380 16.7846  15
   0   8   2 300.199 17.3025   1
   0   8   2 275.683 16.6906   4
   0  -8   2 312.811 18.1809   7
   0   8  -2 294.575 17.9232   7
   0   8   2 317.846 17.1540  16
   0   8   2 277.171 17.5156   9
   0   8  -2 281.570 17.4001   1
   0   8  -2 265.801 17.5314   9
   0   8   3 0.70644 1.43184   5
   0   8  -3 0.14307 1.20804  10
   0   8  -3-0.75102 1.01909  16
   0   8   3-0.96860 1.60347   3
   0   8   3 0.40326 0.46941  15
   0   8  -3 0.66198 1.44512   9
   0   8  -3 0.20220 1.45534   3
   0  -8   3 3.06256 1.66233   8
   0   8   3-0.19550 1.47358   8
   0   8   3-0.12390 1.05840  17
   0   8   3 0.22371 1.04938  16
   0  -8   3-0.22494 0.92717  17
   0  -8   3-0.31729 1.80347   7
   0   8   3 1.05021 0.84842   4
   0   8   3 0.07011 0.60800  14
   0   8   3-0.98456 1.47696   9
   0  -8  -3-0.22902 1.44024   8
   0   8  -3 0.24663 0.63433  15
   0  -8  -3-0.19869 1.41457   7
   0   8  -3-0.27370 1.81562   7
   0  -8   3 0.58109 1.73475   6
   0   8   3-1.01660 1.17743  10
   0   8   3-0.22407 1.53270   7
   0   8   3 0.42858 1.15330   1
   0   8   3-0.19887 1.52091   6
   0  -8   4 44.0556 4.02649   8
   0   8   4 37.7910 3.65948   7
   0   8  -4 38.6128 3.67065   9
   0   8   4 47.9054 3.78880   2
   0   8   4 48.5111 3.33797  17
   0   8   4 49.0454 3.52304  10
   0   8   4 46.5448 3.61305   5
   0   8   4 44.5656 3.64509   3
   0   8  -4 48.1891 3.22946  16
   0   8   4 47.4357 3.67266   9
   0   8   4 38.6149 2.91260  14
   0   8   4 43.5894 3.12231  16
   0   8   4 41.7474 3.55972   8
   0   8  -4 42.3353 4.02621   7
   0  -8   4 38.9696 2.60224  14
   0  -8   4 38.4740 4.02179   6
   0   8   4 43.9163 3.28740   1
   0   8  -4 44.5820 2.87517  15
   0  -8   4 38.9134 4.13040   7
   0   8   4 45.8656 3.61248   6
   0  -8  -4 41.1504 3.65397   8
   0  -8  -4 47.9419 3.51005   7
   0   8   4 43.5450 2.75408  15
   0   8  -4 47.2277 3.42361  10
   0   8  -4 47.1400 3.70413   3
   0  -8   4 39.7465 3.26761  17
   0   8   4 46.3332 3.16196   4
   0   8  -4 38.1392 3.62326   8
   0   8  -5-0.13081 1.02923  16
   0   8  -5 1.79951 1.33036  10
   0   8   5 1.30675 1.10135  16
   0   8   5 0.85248 1.19952   4
   0   8  -5-1.36677 1.58005   9
   0   8   5 3.31284 0.65866  15
   0   8  -5-0.39312 1.51395   1
   0  -8  -5 3.95032 1.60847   8
   0  -8   5 1.46858 1.82386   8
   0   8  -5 1.70880 1.17365  13
   0   8  -5 0.41509 1.49738   3
   0   8   5 2.83229 0.94206  14
   0  -8   5 2.44040 1.36952  17
   0   8   5 1.67385 1.46610   5
   0   8   5 3.68691 1.59009   8
   0  -8   5 1.43711 0.56970  14
   0   8  -5 2.07893 0.81730  15
   0   8   5 2.89424 1.51237  10
   0  -8   5 1.04621 1.98490   7
   0   8   5 2.91743 1.62707   7
   0   8   5 2.58283 1.22043  17
   0   8  -5 0.45896 1.48687   8
   0   8   5-0.84463 1.53147   2
   0   8   5 3.62326 1.20299   1
   0   8   5 1.30924 1.40671   9
   0   8  -5 1.76075 1.91218   7
   0   8   5 1.85288 1.49302   6
   0  -8   5 3.04412 1.95813   6
   0   8   5 1.15872 1.58885   3
   0   8   6 20.7645 2.54638   7
   0   8  -6 22.4285 1.89101  15
   0   8  -6 20.9374 2.17895  13
   0   8   6 25.8147 2.11255  16
   0   8   6 28.7105 2.70996   2
   0  -8   6 22.4768 3.31232   6
   0   8   6 22.0192 2.57957   5
   0   8   6 22.5641 2.13734   1
   0   8   6 24.8560 2.04134  14
   0   8   6 25.8905 2.57318  10
   0  -8   6 19.5746 2.86106   8
   0   8  -6 24.4323 2.73365   9
   0  -8   6 23.9759 2.62738  17
   0   8   6 23.4616 1.76962  15
   0  -8   6 25.1264 1.75064  14
   0   8   6 20.7534 2.41541   4
   0   8   6 21.2631 2.41860   9
   0   8   6 25.0484 2.47704   8
   0   8   6 23.0822 2.41765  17
   0   8  -6 21.2173 2.55888   1
   0   8  -6 25.1386 2.66745   3
   0   8  -6 23.8613 2.75906   8
   0   8   6 19.0310 2.34550   6
   0  -8   6 23.1189 3.25528   7
   0   8   6 24.8452 2.58784   3
   0   8  -6 24.6918 2.21061  16
   0   8  -6 22.1500 2.41609  10
   0   8   7 1.26813 1.37371  17
   0   8   7 0.39500 1.46803   4
   0   8   7 0.97599 1.44361   7
   0   8  -7 0.64476 1.64488   3
   0   8   7 2.43844 1.72848   2
   0   8  -7 1.36230 1.12486  16
   0  -8   7 3.09114 2.34367   6
   0  -8   7 1.23128 0.76716  14
   0   8   7 1.58618 1.30372   6
   0  -8   7 3.45162 2.37846   7
   0   8  -7 0.47074 1.69526   9
   0   8   7 1.40787 1.31500   9
   0   8  -7 4.11447 1.64265  10
   0   8  -7 1.49863 1.52558   1
   0   8   7 0.19165 1.62586   3
   0   8   7 1.01202 1.54186  10
   0   8   7 1.15144 0.96294   1
   0   8  -7 0.27962 1.20055  13
   0   8   7 1.71039 0.75258  15
   0   8   7-0.12839 1.02066  14
   0   8   7 0.74546 1.04737  16
   0   8   7 0.56616 1.57605   5
   0   8  -7 0.47587 1.72289   8
   0   8   7-0.51996 1.39468   8
   0   8  -7 1.78915 0.92394  15
   0   8  -8 128.486 8.51350   8
   0   8   8 161.343 7.87662  11
   0  -8   8 114.270 7.73710   4
   0   8   8 124.428 7.75798   1
   0  -8   8 123.450 7.81893  16
   0   8   8 127.919 7.58824  13
   0   8   8 127.434 7.78289  16
   0   8   8 129.097 8.21189   7
   0   8  -8 134.509 7.99210  16
   0   8   8 111.854 7.61974  15
   0   8  -8 113.856 8.41855   9
   0  -8   8 121.080 7.63025  14
   0   8   8 120.348 8.10252   6
   0  -8   8 119.467 7.94173  15
   0  -8   8 131.884 9.34551   7
   0   8  -8 145.079 8.48344  10
   0   8   8 123.345 8.37669   4
   0   8   8 115.116 7.90483  14
   0   8  -8 122.884 7.73600  15
   0   8  -8 117.897 8.33022   1
   0   8   8 136.895 8.52658   2
   0   8   8 127.249 8.22180   3
   0   8   8 118.440 8.20444  17
   0   8   8 123.683 8.08188   9
   0   8  -8 110.975 8.27000   3
   0   8   8 117.190 8.03489   8
   0  -8   8 117.090 9.22910   6
   0   8   8 143.468 8.50582  10
   0   8   8 128.673 8.26851   5
   0  -8   9 2.02289 1.21973   4
   0   8   9 1.78819 0.83095  13
   0  -8   9 5.20939 2.69145   6
   0   8   9 0.39918 0.87858  15
   0   8  -9 1.13108 0.95176  15
   0   8  -9-0.23249 1.76125  10
   0  -8   9-2.92085 2.45227   7
   0   8   9-0.32309 1.29325   8
   0   8   9-1.27664 1.55221   7
   0   8   9-1.11909 1.65319   5
   0   8   9-0.37050 1.47648   3
   0   8  -9 1.08169 2.00834   2
   0   8   9 1.05567 1.56019  17
   0   8   9-0.40209 1.12323  11
   0   8  -9 0.14187 1.25759  16
   0   8  -9 0.24369 1.64722   8
   0  -8   9 1.29265 1.28791  15
   0   8   9 0.79390 1.28213   9
   0   8   9-2.30647 1.39538   6
   0   8   9 0.84275 1.02249  16
   0   8   9 2.89375 1.85318   2
   0   8   9-1.20469 1.88618  10
   0  -8   9 0.23607 1.13539  16
   0   8  -9 2.67475 1.76860   3
   0   8   9 1.73192 1.22716  14
   0   8   9 0.09331 0.90582   1
   0   8   9 2.51756 1.69129   4
   0  -8   9 0.38627 0.86233  14
   0   8  -9 2.55803 1.70076   1
   0  -8   9 0.32304 2.07417   8
   0   8  -9 0.72288 1.84299   9
   0  -8  10 108.759 8.42319   8
   0   8 -10 120.036 8.07974   9
   0   8 -10 112.947 7.94381   3
   0   8  10 96.0033 7.54747   6
   0   8  10 105.466 7.57078   7
   0   8  10 108.586 7.59130   3
   0   8  10 111.670 7.08377   1
   0   8  10 118.858 8.19717   4
   0   8  10 110.868 7.84090  17
   0   8  10 117.256 7.48439   9
   0  -8  10 106.888 7.58815  15
   0  -8  10 127.569 9.28960   6
   0   8  10 100.328 7.51646  14
   0   8  10 103.498 7.24414  15
   0   8  10 133.513 8.20817   2
   0   8  10 103.152 7.43670   8
   0   8 -10 116.375 8.23936   2
   0   8 -10 134.611 8.23827  10
   0   8 -10 109.428 7.32012  15
   0   8  10 134.367 8.28014  10
   0   8 -10 120.023 7.50908  16
   0   8  10 119.147 7.09145  13
   0   8  10 124.649 7.30550  16
   0   8  10 119.121 7.71149   5
   0  -8  10 105.385 8.90602   7
   0   8 -10 119.057 8.00080   1
   0   8 -11 7.60396 2.22482   1
   0   8  11 9.66029 1.93804   7
   0   8  11 13.1498 1.56738  11
   0   8 -11 9.23553 1.50899  15
   0   8  11 12.1517 2.49243   2
   0   8  11 8.74385 2.00565  17
   0  -8  11 12.5912 1.96131  15
   0   8  11 10.4211 1.49134  15
   0   8  11 16.1570 2.74082  10
   0   8  11 13.0427 2.03331  14
   0  -8  11 8.59411 2.88171   7
   0   8  11 12.3702 1.74842   8
   0   8 -11 15.0202 1.88289  16
   0   8  11 11.9120 1.52120  16
   0   8  11 8.43758 1.83934   6
   0   8 -11 15.6017 2.81283   2
   0   8 -11 9.28835 2.33900  10
   0   8  11 11.6810 1.85957   3
   0   8 -11 9.56991 2.41675   9
   0   8  11 12.3454 1.22354  13
   0  -8  11 15.1969 2.87307   8
   0  -8  11 11.6255 3.30101   6
   0   8  11 12.8756 2.07905   5
   0   8  11 11.7769 1.06823   1
   0   8  11 11.9545 2.67204   4
   0   8  11 10.4321 1.61008   9
   0   8 -12 44.8247 3.31805  16
   0   8 -12 38.5228 3.98351  10
   0   8  12 40.3940 3.87254  17
   0   8  12 42.4725 4.19348  10
   0   8  12 36.9898 3.03325   9
   0   8  12 43.8869 3.98330   2
   0   8  12 41.1616 4.27387   4
   0   8  12 36.5004 3.05449  15
   0   8 -12 36.0145 3.14676  15
   0   8  12 37.2927 3.28040   7
   0  -8  12 41.5328 3.56259  15
   0  -8  12 42.1454 4.40173   8
   0   8  12 39.8611 2.76065  13
   0   8 -12 45.1728 3.98807   1
   0   8  12 43.0187 3.01213  16
   0   8  12 45.9939 2.85105  11
   0  -8  12 35.7324 4.95728   6
   0   8  12 36.2596 3.39784   6
   0   8 -12 40.1617 4.16613   2
   0   8  12 37.7494 3.09030   8
   0   8  12 39.9583 3.49269  14
   0   8  12 40.3797 3.29338   3
   0   8  12 42.1676 3.44864   5
   0   8  13 9.16442 1.79573   5
   0   8 -13 7.58278 2.39407  10
   0   8  13 8.01781 1.32553   9
   0   8  13 8.03420 1.92188  14
   0  -8  13 8.17796 1.83940  15
   0   8  13 8.84725 1.58484   3
   0   8  13 8.19890 1.06028  11
   0   8 -13 8.79869 2.95144   2
   0  -8  13 8.10092 2.79783   8
   0   8  13 8.33959 1.13099  13
   0   8  13 6.36950 1.74021   6
   0   8  13 8.35750 1.30060  16
   0  -8  13 10.7453 3.64010   6
   0   8  13 6.89947 2.71136   4
   0   8  13 10.8121 2.85998  10
   0   8 -13 8.08488 1.66081  15
   0   8  13 7.72279 1.42666   8
   0   8 -13 10.1608 1.85080  16
   0   8  13 7.21479 1.75283   7
   0   8  13 8.61745 2.47462   2
   0   8  13 7.02152 2.33572  17
   0   8 -13 9.83681 2.42546   1
   0  -8  14 38.3382 4.35214   8
   0   8  14 32.7195 3.07783  15
   0  -8  14 35.6453 3.56070  15
   0   8 -14 37.8296 3.23487  16
   0   8 -14 40.4027 3.93786   1
   0   8  14 42.1190 2.89336  16
   0   8  14 34.7297 2.63282  13
   0   8  14 44.3314 3.38659   5
   0   8 -14 46.7990 4.34846  10
   0   8  14 37.7059 3.89842  17
   0   8  14 29.3858 3.34870  14
   0  -8  15 2.18523 2.50670   8
   0   8  15 0.69704 0.88796  13
   0   8 -15 2.36258 2.35403   1
   0  -8  15 1.56937 3.24361   7
   0   8  15-0.17799 1.32299  15
   0   8  15-0.24979 1.88371  14
   0   8  15 1.52933 1.12497  16
   0  -8  15 7.69027 3.64115   6
   0   8 -15-0.35923 2.62752  10
   0   8 -15 0.82047 1.41356  16
   0  -8  15 2.26782 1.88149  15
   0   8 -16 30.8745 3.96323  10
   0  -8  16 14.8638 4.28356   6
   0  -8  16 24.8710 4.32667   7
   0   8  16 26.6694 2.68649  15
   0   8  16 29.2021 2.26974  16
   0   8 -16 24.2649 2.63351  16
   0  -8  16 16.9686 3.44805   8
   0   8 -16 25.4027 3.42987   1
   0  -8  16 22.7976 3.09262  15
   0   8  16 24.5423 3.20579  14
   0  -8  17 2.23375 3.30915   7
   0  -8  17 3.13012 2.16743  15
   0  -8  17-0.74543 2.66941   8
   0   8 -17 0.86476 1.64000  16
   0   8 -17-1.21414 2.76962  10
   0  -8  17 1.29500 3.74417   6
   0   8  17 2.55597 2.31370  14
   0   8  17 1.64639 1.70552  15
   0   8 -17 2.84610 2.28980   1
   0  -8  18 8.11778 2.45173  15
   0   8 -18 11.6659 2.04564  16
   0   8 -18 12.0051 3.35821  10
   0  -8  18 2.02677 4.07335   6
   0   8 -18 11.7781 2.84116   1
   0  -8  18 7.88947 2.95523   8
   0  -8  18 9.79571 4.14139   7
   0   8  18 10.3352 2.12039  15
   0   8 -19 3.24678 1.85408  16
   0   8 -19 2.01259 2.66692   1
   0  -8  19 5.07106 2.54265  15
   0   8 -19 3.61409 3.29091  10
   0   8  19 5.42391 2.51482  14
   0  -8  19 1.13021 2.77471   8
   0  -8  19-1.77010 3.79214   7
   0   8 -20 36.6497 5.07426  10
   0   8  20 33.6600 4.08230  14
   0   8  20 34.6365 3.62770  15
   0  -8  20 42.9496 4.40080  15
   0  -8  20 39.2738 4.56456   8
   0   8 -21 1.99911 3.59894  10
   0   9   0-0.55382 1.39159   1
   0   9   0 1.35428 1.57522   5
   0   9   0-0.23052 1.96165   8
   0   9   0-0.30270 0.51564  15
   0   9   0 0.22334 1.74035   3
   0   9   0-0.67571 1.23951  16
   0  -9   0-0.73620 1.69855   6
   0   9   0-1.62603 1.70753   9
   0  -9   0-1.15937 2.04081   8
   0   9   0 0.27487 1.89139   7
   0   9   0 0.28484 1.24421  10
   0  -9   0 0.59093 1.89702   7
   0   9  -1 66.7888 5.56945   8
   0  -9  -1 84.9800 5.99305   8
   0  -9   1 76.0979 5.89533   8
   0   9  -1 79.2564 5.15711  10
   0   9   1 69.0199 5.71099   7
   0   9  -1 74.1366 4.56495  15
   0   9  -1 76.6827 5.89179   7
   0   9   1 71.4512 4.54647  15
   0   9   1 64.4364 5.45712   9
   0   9   1 74.4041 5.62105   8
   0   9   1 78.9493 5.59660   3
   0  -9   1 78.3126 5.81513   6
   0   9   1 79.7974 5.44617   5
   0   9   1 78.2462 5.69613   6
   0   9  -1 76.5861 5.35540   1
   0   9   1 82.9789 5.13230  16
   0  -9   1 79.2543 6.06339   7
   0  -9   1 75.7162 4.51897  17
   0  -9  -1 65.9743 5.69303   7
   0   9   1 67.3363 5.24442   1
   0  -9  -1 79.4343 5.53998   6
   0   9   2 3.59727 1.42326   1
   0   9   2 1.32475 1.66066   8
   0   9   2 1.84263 1.72346   6
   0  -9   2 2.94423 2.01772   6
   0   9  -2 1.79270 1.49174   1
   0   9   2 0.45017 1.62473   9
   0   9  -2 1.72305 0.61252  15
   0   9   2 2.36774 0.59669  15
   0   9   2 2.23281 1.26899  16
   0   9  -2 1.45520 2.13182   7
   0  -9  -2-0.24783 1.74932   7
   0  -9  -2 3.52630 1.83738   8
   0  -9   2 0.33293 1.94457   7
   0  -9   2 3.07171 1.96262   8
   0  -9   2 2.22964 0.67920  17
   0   9   2 1.03600 1.85819   7
   0   9   2 3.49448 1.30987  10
   0   9  -2 2.61519 1.38141  10
   0   9   2 1.76418 1.76928   3
   0   9   2 2.95516 1.64855   5
   0   9  -2 3.60857 1.79073   8
   0  -9   3 10.8204 2.61719   7
   0   9  -3 7.41502 1.56625  16
   0   9   3 9.36285 1.68430  10
   0   9   3 8.68296 0.91201  15
   0   9   3 6.82424 0.76143  15
   0   9   3 7.24841 1.85766   9
   0   9   3 9.23528 1.64282   1
   0   9   3 6.06665 0.82894   4
   0   9   3 8.01323 1.39588  16
   0   9   3 7.26909 1.96822   7
   0   9   3 9.92424 2.17959   3
   0   9  -3 5.68875 1.56803  10
   0   9  -3 6.61430 2.32059   7
   0  -9   3 7.28124 2.21098   6
   0   9  -3 5.04736 1.75285   3
   0   9   3 8.87327 1.95381   6
   0  -9   3 9.44057 2.32039   8
   0   9   3 9.74254 0.97196  14
   0   9   3 6.80919 1.87830   5
   0   9  -3 9.23937 1.79676   1
   0  -9  -3 7.86237 2.02524   8
   0   9   3 6.30520 1.81832   8
   0  -9  -3 10.2381 1.91287   7
   0   9  -3 11.4718 2.12442   9
   0   9  -3 7.58649 0.91798  15
   0   9  -4 1.55721 2.13455   7
   0   9   4 1.91161 1.19550  16
   0   9   4 3.13408 1.52866  10
   0  -9  -4-0.25141 1.82409   8
   0   9   4 1.99018 1.17513  17
   0   9   4 1.78046 1.01992   4
   0   9   4 2.20065 1.69627   3
   0   9   4 2.83537 0.61285  15
   0   9  -4 1.38144 1.21419  13
   0   9  -4 1.89132 1.20189  16
   0   9   4 1.92836 1.79999   9
   0  -9   4 4.40861 2.37834   7
   0  -9  -4 4.22967 1.57511   7
   0  -9   4 2.42484 1.07140  17
   0   9   4 1.04877 0.76861  14
   0   9  -4 3.79197 0.79485  15
   0  -9   4 9.83042 2.69267   6
   0   9   4 1.42434 1.36874   1
   0  -9   4 0.32214 1.98712   8
   0   9   4 3.07702 1.91548   2
   0   9   4 2.54067 1.65516   8
   0   9  -4-0.24830 1.75336   9
   0   9   4 1.92735 1.65869   6
   0   9  -4 4.89205 1.43425  10
   0   9  -4 2.31990 1.84540   3
   0   9   4 1.21366 1.75216   7
   0   9   4 2.27632 1.67595   5
   0   9  -5 67.2830 5.41643   9
   0  -9   5 66.0438 6.02854   6
   0   9   5 69.4223 4.80166  16
   0   9   5 73.1825 4.95599  17
   0   9   5 72.5562 5.39638   3
   0  -9  -5 84.0949 5.24159   7
   0   9  -5 71.7545 5.48986   8
   0  -9   5 77.1980 6.22804   7
   0   9  -5 74.0874 5.90818   7
   0   9   5 82.6595 5.22084  10
   0   9   5 83.8510 5.60966   2
   0  -9   5 73.8868 5.89459   8
   0  -9   5 65.2010 4.94887  17
   0  -9  -5 78.8139 5.53757   8
   0   9   5 62.1253 5.25906   7
   0   9  -5 66.5822 4.90672  16
   0   9  -5 71.0676 4.89927  13
   0   9   5 67.4887 5.24530   9
   0   9   5 66.9722 5.27293   5
   0   9   5 73.6734 4.87108   4
   0   9   5 73.3195 5.26777   6
   0   9   5 65.9431 4.38156  15
   0   9   5 60.7837 5.14783   8
   0   9  -5 76.3219 5.47606   3
   0   9   5 70.2905 4.97829   1
   0   9  -5 69.7758 4.49833  15
   0   9  -5 80.9199 5.16304  10
   0   9   5 68.4994 4.61626  14
   0   9   6 0.29019 1.18650   1
   0   9  -6-0.73766 1.41887  13
   0   9  -6 1.00178 0.81274  15
   0   9   6 1.76257 1.38455   4
   0  -9   6 0.20159 1.48203  17
   0   9   6-1.40308 1.76388   8
   0   9   6 0.87743 0.91553  14
   0   9  -6 0.90350 1.28654  16
   0   9   6-0.38555 1.56968  10
   0   9  -6 0.33318 2.16792   7
   0  -9   6-0.33708 2.04394   8
   0  -9   6 0.40106 2.25997   7
   0   9   6 0.45315 0.64144  15
   0   9   6-0.85242 1.82749   5
   0  -9   6 0.77525 2.43780   6
   0   9   6 0.40395 1.53746   6
   0  -9   6 0.85689 0.49203  14
   0   9   6 0.91303 1.58001   7
   0   9   6 1.67435 1.88096   2
   0   9   6-0.12514 1.22516  16
   0   9  -6-0.55416 1.48503  10
   0   9  -6-0.23065 1.74724   1
   0   9   6 0.20516 1.56169   9
   0   9   6-0.43927 1.81813   3
   0   9   6-0.16871 1.37378  17
   0   9   7 64.7795 5.04462   6
   0   9   7 69.6296 4.80622   1
   0   9   7 74.6029 5.37844   5
   0   9   7 63.1576 5.18360   7
   0   9   7 68.0688 5.27893   3
   0   9   7 78.3441 5.52902   2
   0   9   7 71.3445 5.17360   9
   0   9  -7 74.0729 5.21320  10
   0   9   7 84.9902 5.39847  10
   0   9   7 71.4890 4.73697  16
   0  -9   7 77.2881 6.33381   7
   0   9  -7 74.5013 4.92591  16
   0   9   7 65.2370 5.09722   8
   0   9  -7 63.5639 4.50211  15
   0   9   7 77.0926 5.19609   4
   0   9   7 69.9913 4.43796  15
   0   9   7 66.1835 4.69408  14
   0   9  -7 69.5068 5.35932   1
   0  -9   7 74.4945 6.29849   6
   0   9   7 61.1035 4.97619  17
   0   9   8-0.64337 1.57647   7
   0   9   8 0.91464 1.86172  10
   0  -9   8 1.31419 2.81250   6
   0   9   8-0.25467 1.93840   2
   0   9   8-0.75975 1.20297   1
   0   9   8 0.58369 1.45943   6
   0   9   8-0.56621 1.51067   8
   0   9   8 0.98064 0.88190  13
   0   9   8 0.65629 1.69683   4
   0   9   8 1.06550 1.85483   5
   0  -9   8 3.04508 2.65754   7
   0   9   8 3.61089 1.57316   9
   0   9   8-1.29397 1.87712   3
   0   9   8 0.23285 1.21037  11
   0   9   8-1.62874 1.62955  17
   0   9   8-0.14111 1.14416  14
   0   9  -8-0.24930 1.75536   1
   0   9  -8 0.78105 1.32425  16
   0   9  -8 0.30599 0.90408  15
   0   9   8 0.59632 0.78147  15
   0   9   8 0.24422 1.06683  16
   0   9  -8-0.43595 1.71403  10
   0   9   9 64.9307 5.08435  14
   0   9   9 81.1936 5.58930   5
   0   9  -9 76.7192 5.66055  10
   0   9   9 86.2164 5.81012  10
   0   9   9 72.6017 5.30236   9
   0   9   9 63.0683 5.29833   7
   0   9   9 68.2602 5.25283   8
   0   9   9 78.5260 5.43909   6
   0  -9   9 62.9716 6.54993   6
   0   9  -9 82.7959 6.08267   2
   0   9  -9 73.6820 4.91947  15
   0   9   9 66.8425 4.79490  15
   0   9   9 74.6778 4.77376  13
   0   9   9 76.8140 5.54891  17
   0  -9   9 73.0150 6.73404   7
   0   9   9 85.3147 5.96421   2
   0   9  -9 74.4048 5.20847  16
   0   9   9 82.6336 5.06877  16
   0   9   9 70.7576 5.45567   3
   0   9   9 96.9972 5.16222  11
   0   9   9 82.3184 5.74807   4
   0   9   9 72.4634 4.93826   1
   0   9  -9 69.1683 5.70006   1
   0  -9   9 65.3589 5.89007  17
   0   9  10 9.74316 2.01965   5
   0   9  10 9.61290 1.56362  16
   0   9  10 7.27720 1.66341   8
   0   9  10 6.40438 1.67686  14
   0   9  10 7.61331 2.36192   2
   0  -9  10 9.39202 3.13150   7
   0   9  10 8.34714 2.43298  10
   0  -9  10 9.55245 2.91476   8
   0   9 -10 8.34009 2.51735   2
   0   9 -10 6.71358 2.01028   1
   0  -9  10 7.80280 3.24931   6
   0  -9  10 9.80802 1.72513  15
   0   9  10 7.06105 1.75547   7
   0   9  10 12.1198 2.48679   4
   0   9 -10 8.69251 2.30701  10
   0   9  10 7.24723 1.24686  15
   0   9  10 9.30391 1.17303  13
   0   9  10 6.99854 1.91219   6
   0   9  10 11.1749 1.68584  11
   0   9 -10 5.66520 1.60459  16
   0   9  10 8.04600 1.26356   1
   0   9  10 8.46933 1.95906   3
   0   9 -10 8.05648 1.35474  15
   0   9  10 7.73827 1.73933   9
   0   9  10 7.29225 2.04969  17
   0   9  11 18.6385 2.42649   6
   0   9  11 25.8727 2.87833  17
   0   9  11 26.2827 2.19829  11
   0   9  11 20.6599 1.69585   1
   0  -9  11 22.8487 3.46408   8
   0   9  11 18.9486 2.22649   8
   0   9  11 22.2314 2.03255  16
   0   9 -11 22.2274 2.85613   1
   0  -9  11 19.9947 4.02950   6
   0   9  11 18.7336 2.32725   7
   0   9  11 19.3963 1.74670  13
   0  -9  11 21.5476 2.45499  15
   0   9 -11 22.6795 2.36355  16
   0   9  11 21.3049 3.07364   4
   0   9  11 17.6276 2.19994   9
   0   9  11 20.0971 2.50002   3
   0   9  11 24.0612 3.04924   2
   0  -9  11 20.4915 3.67633   7
   0   9 -11 20.4049 2.93378  10
   0   9  11 16.5863 2.91964  10
   0   9  11 23.5140 2.59117   5
   0   9 -11 27.3099 3.48787   2
   0   9  11 22.2541 2.43456  14
   0   9 -11 17.3570 2.06065  15
   0   9  12 4.69361 2.40838  10
   0   9  12 5.97145 2.68048   4
   0   9  12 5.17994 2.27906   2
   0   9  12 4.09900 2.26901  17
   0   9 -12 5.08649 1.68642  16
   0  -9  12 10.3028 3.06609   8
   0   9  12 5.72519 1.26664  15
   0  -9  12-1.07845 3.07692   6
   0  -9  12 9.09814 3.46808   7
   0   9  12 3.53306 1.21354  11
   0   9  12 3.13953 1.63601   3
   0   9  12 4.69256 1.65538  14
   0   9 -12 3.77908 2.60378   2
   0  -9  12 8.05175 1.84972  15
   0   9  12 6.28882 1.86934   5
   0   9  12 4.50399 1.00147  13
   0   9 -12 0.88935 2.36757  10
   0   9 -12 4.43357 1.37310  15
   0   9 -12 4.90953 2.26663   1
   0   9  13 39.5901 2.75652  13
   0   9  13 37.9665 3.11482  15
   0   9 -13 39.4903 3.31726  16
   0   9  13 41.9350 4.51581   4
   0   9 -13 40.5324 4.08095   1
   0   9 -13 40.7516 4.47536   2
   0   9  13 30.3400 3.46771  14
   0  -9  13 38.4143 5.36168   6
   0  -9  13 40.4046 3.64506  15
   0   9  13 44.5294 3.08159  16
   0  -9  13 32.1529 4.38544   8
   0   9 -14-0.38146 2.49928   2
   0   9  14 1.51211 1.29270  16
   0  -9  14 2.75915 2.74492   8
   0   9 -14 2.12101 1.75661  16
   0  -9  14 0.59150 3.50476   6
   0   9 -14 0.67266 2.53622  10
   0   9 -14 0.62367 2.26965   1
   0   9 -15 21.8622 3.44761  10
   0   9 -15 18.5542 3.66677   2
   0  -9  15 17.5787 3.68293   8
   0   9  15 13.6175 2.46485  14
   0   9 -15 18.0864 3.23544   1
   0   9  15 15.1576 2.05218  15
   0  -9  15 15.7204 2.50501  15
   0  -9  15 16.7196 4.65380   6
   0   9  15 15.9047 1.81718  16
   0   9 -15 21.1350 2.42178  16
   0  -9  16 6.97183 2.09834  15
   0   9  16 1.34456 1.95539  14
   0  -9  16 4.52362 3.92813   6
   0   9 -16 8.01579 2.87738   1
   0  -9  16 4.02157 3.77278   7
   0   9 -16 8.05775 3.37609   2
   0  -9  16 5.25558 3.20526   8
   0   9  16 5.74686 1.65480  15
   0   9 -16 5.17656 1.92220  16
   0   9 -16 0.38067 2.85466  10
   0  -9  17 11.6591 2.54146  15
   0   9  17 10.8574 2.60548  14
   0   9  17 11.1146 2.04392  15
   0  -9  17 10.2053 3.37241   8
   0   9 -17 12.8509 3.23799  10
   0   9 -17 13.9616 3.42032   2
   0  -9  17 15.4828 4.66002   6
   0   9 -17 14.4457 3.14168   1
   0  -9  17 11.8251 4.20106   7
   0   9 -17 14.3479 2.27566  16
   0   9 -18-0.19260 1.82123  16
   0   9 -18 0.84983 3.18881  10
   0  -9  18-1.82269 4.15721   7
   0   9 -18 1.89337 3.63866   2
   0   9 -18 1.76613 2.51700   1
   0   9  18 2.12711 1.75662  15
   0  -9  18 4.09299 3.14679   8
   0  -9  18 2.10106 3.80673   6
   0   9  18 6.05221 2.47626  14
   0   9 -19 16.6776 2.42769  16
   0  -9  19 14.3096 3.62750   8
   0   9 -19 18.1032 3.48334   1
   0   9 -19 19.7067 4.00573  10
   0  -9  20-2.03649 3.20314   8
   0   9 -20 0.46965 3.64309  10
   0  10   0 3.06005 1.49279  16
   0  10   0 4.18999 1.57922   1
   0 -10   0 3.55887 2.34635   8
   0 -10   0 4.44105 2.00404   6
   0  10   0 2.16390 0.52272  15
   0 -10   0 3.54566 2.27496   7
   0  10   0 4.23373 2.06222   7
   0  10   0 3.51877 1.39303  10
   0  10   1 2.11909 1.37620  10
   0  10  -1 0.94115 0.51470  15
   0  10  -1 2.15725 1.64349   1
   0  10  -1-0.43978 1.25907  10
   0 -10   1 2.31354 1.97946   6
   0 -10  -1 0.62880 1.90763   8
   0  10   1 0.60182 1.33058  16
   0 -10  -1 0.60202 1.89433   7
   0  10   1 0.58729 2.22537   7
   0  10   1 1.16558 0.40039  15
   0  10   1 1.00865 1.60912   1
   0 -10   1 0.68542 1.93240   7
   0 -10  -1 1.15447 1.69873   6
   0 -10   1 2.99538 2.15236   8
   0  10   1 1.98048 1.95667   8
   0  10   1 1.80408 0.45355  15
   0  10  -1-0.30898 2.21303   7
   0 -10   2 15.2844 2.92545   7
   0 -10  -2 17.6070 2.20366   6
   0 -10  -2 20.7176 2.86855   8
   0  10  -2 16.8583 2.03741  10
   0  10   2 13.5420 2.45682   6
   0  10  -2 15.8933 3.03578   7
   0  10   2 18.2579 2.02536  16
   0  10   2 22.8549 2.43826   1
   0 -10   2 18.1019 3.00145   8
   0 -10   2 17.0431 2.77689   6
   0  10   2 18.5286 3.02807   7
   0  10  -2 19.4464 2.41088   1
   0  10  -2 15.5698 1.25122  15
   0  10   2 15.1447 2.50413   8
   0 -10  -2 16.9383 2.58977   7
   0  10   2 15.3884 1.17566  15
   0  10   2 14.7844 2.03193  10
   0 -10   3 1.01986 2.32537   6
   0  10  -3 0.94233 0.58872  15
   0  10   3-2.72417 2.03314   5
   0  10  -3 0.30378 1.36977  10
   0  10   3-1.66073 2.07607   7
   0  10   3-2.37420 2.21876   2
   0  10   3-0.71563 1.96644   8
   0 -10   3-0.38054 2.16296   7
   0  10   3 1.42701 1.50618  10
   0 -10  -3 2.21700 1.92821   7
   0 -10  -3-0.88095 1.42844   6
   0  10   3 0.48256 1.68925   6
   0  10   3 0.32590 0.52313  15
   0 -10  -3 1.46716 2.08911   8
   0 -10   3-1.75019 2.21675   8
   0  10  -3-0.28967 1.32829  13
   0  10  -3-1.15655 1.69147   1
   0  10   3-1.32065 1.62388   1
   0  10   3 1.31923 1.36640  16
   0  10   4 38.5291 3.28869  10
   0  10  -4 38.2009 3.23007  10
   0  10   4 40.8490 3.85107   7
   0 -10   4 35.1441 4.10572   8
   0  10   4 38.9520 3.14002  16
   0 -10  -4 47.9008 4.04901   8
   0  10   4 31.3183 3.46172   6
   0  10   4 33.0442 3.48330   8
   0  10  -4 33.9702 3.55085   1
   0  10   4 39.1932 2.47728   4
   0  10   4 47.8557 3.98854   2
   0  10  -4 40.4311 2.59292  15
   0 -10  -4 47.2652 3.68515   7
   0  10   4 36.9586 2.51251  15
   0 -10  -4 39.1301 3.17262   6
   0  10  -4 39.7638 3.23135  16
   0  10   4 39.0108 2.63433  14
   0  10   4 41.6375 3.34269   1
   0 -10   4 43.0463 4.38778   6
   0  10   4 35.5078 2.43485  15
   0 -10   4 30.8438 4.28834   7
   0  10   4 39.5126 3.73940   9
   0 -10   5 4.23698 2.54005   6
   0 -10  -5 4.57592 1.75110   7
   0  10   5 0.90732 1.65183   6
   0  10  -5 1.25917 0.74966  15
   0  10   5 0.96502 1.08307   4
   0 -10   5-1.25458 2.39860   7
   0  10   5 3.48564 1.57355   1
   0  10   5 1.13492 1.76219   8
   0  10   5 1.58074 1.42088  16
   0 -10   5 1.09859 2.13596   8
   0  10   5 2.61064 1.98184   5
   0  10   5 1.04975 1.99892   2
   0  10  -5 1.20718 1.53567  10
   0  10   5 0.79643 1.19950  17
   0  10   5 1.02803 0.65700  15
   0  10   5 1.62380 1.78412   9
   0  10   5 1.46413 1.54727  10
   0  10   5 1.40128 0.59209  15
   0  10   5 0.96663 0.83830  14
   0  10  -5 0.16550 1.41586  16
   0  10   5 3.12919 2.07025   7
   0  10   6 50.0077 3.42907  16
   0  10   6 42.9472 3.45693   1
   0  10   6 36.4223 3.00967  14
   0  10  -6 45.3911 3.62992  10
   0  10   6 42.4050 3.78985   9
   0  10  -6 42.8586 3.48282  16
   0  10   6 38.0240 3.87785   7
   0  10   6 43.3277 3.80700   8
   0  10   6 52.6452 4.23710   2
   0  10   6 37.2281 3.31130  17
   0 -10   6 34.7968 4.69783   7
   0 -10   6 54.6539 4.84052   8
   0  10   6 49.9950 3.79302  10
   0  10   6 45.6003 3.37203   4
   0  10  -6 40.3501 2.89061  15
   0  10   6 41.0729 3.97509   3
   0 -10   6 43.0428 4.67533   6
   0  10   6 37.5104 3.65743   6
   0 -10   7-1.52698 2.26206   8
   0  10  -7 0.79818 1.96650   1
   0  10   7 0.64561 1.72327   8
   0  10   7 0.64555 1.73801   6
   0  10   7 0.64569 1.70088  10
   0  10   7 1.62832 2.10562   2
   0  10  -7 2.73630 1.45632  16
   0  10   7 0.21897 1.85698   9
   0  10  -7 1.77723 0.89885  15
   0  10   7 0.54727 1.41597  11
   0  10   7-0.17990 1.49613  17
   0 -10   7 0.43652 2.68711   6
   0  10   7-0.14054 1.38866  16
   0  10   7 1.88753 1.50438   1
   0  10   7-0.68795 1.56780   4
   0  10   7 3.18792 1.96343   3
   0  10   7 1.50571 0.76135  15
   0 -10   7 3.62456 2.84975   7
   0  10   7 0.24515 1.74626   7
   0  10  -7-0.40452 1.58415  10
   0  10   8 21.0835 2.95896  10
   0  10  -8 23.9155 2.93533   1
   0  10   8 21.2102 2.72832   9
   0  10   8 25.9735 2.32253  16
   0  10  -8 22.3798 1.94708  15
   0  10   8 22.5627 2.34229   1
   0  10   8 26.7927 3.16895   2
   0  10   8 22.5765 2.58639  17
   0  10  -8 26.4523 2.77821  10
   0  10   8 21.3907 2.67720   7
   0 -10   8 23.9829 3.76779   7
   0 -10   8 22.1456 4.02744   6
   0  10   8 22.2218 2.59714   6
   0  10   8 18.1743 2.54384   8
   0  10   8 20.9336 2.95840   3
   0  10   8 27.0793 2.43570  11
   0  10   8 17.1688 2.10781  14
   0  10  -8 26.3601 2.52567  16
   0  10   8 30.2582 2.87249   4
   0  10   9 1.98465 0.92631  15
   0  10  -9 4.05557 1.54664  16
   0  10   9 2.19694 1.58364   8
   0  10  -9 2.24843 2.47206   2
   0  10   9 1.34728 1.31843   1
   0  10   9 4.54798 1.47570  16
   0  10  -9 2.27755 1.01088  15
   0 -10   9-0.97373 2.72274   6
   0  10   9 1.42990 1.59776   9
   0  10   9-0.57429 2.29239   2
   0  10   9 0.46143 1.68407   7
   0  10   9 1.13355 1.42563  11
   0  10  -9 3.40515 2.15386   1
   0  10   9 3.81720 2.01483  10
   0  10   9 4.11904 1.06184  13
   0  10  -9 1.89061 1.99256  10
   0  10   9 2.57009 1.28909  14
   0 -10   9 6.32819 3.10719   7
   0  10   9 3.34392 1.95774   3
   0  10  10 10.5442 1.68811  16
   0  10  10 7.88154 1.55593  14
   0  10  10 4.71437 2.23953   2
   0  10 -10 9.86776 1.91118  16
   0 -10  10 6.15201 3.19110   6
   0  10 -10 4.71719 2.32563   1
   0  10  10 8.38766 2.13352   3
   0 -10  10 10.0944 3.33974   7
   0  10  10 8.35585 1.20791  13
   0  10  10 9.80480 1.46043   1
   0  10  10 4.42672 1.71202   9
   0  10  10 12.1523 2.00390  11
   0 -10  10 6.86665 3.09651   8
   0  10 -10 8.02129 2.77388   2
   0  10  11 9.33231 1.26629  13
   0  10  11 12.2219 1.72699  16
   0 -10  11 6.25630 3.43780   7
   0  10  11 6.61991 1.71167  14
   0  10 -11 12.8635 2.68490   1
   0  10  11 6.52464 1.34189  15
   0 -10  11 10.7815 3.81526   6
   0  10 -11 13.9065 2.06531  16
   0  10 -11 10.8587 2.89419   2
   0  10 -11 12.6329 2.67570  10
   0  10  11 11.5331 1.73760  11
   0  10  12 32.9693 2.31434  13
   0  10  12 24.4339 2.83352  14
   0  10 -12 35.9268 4.07384   2
   0 -10  12 34.0201 4.79841   7
   0  10 -12 37.8502 3.75816  10
   0  10 -12 33.1484 3.77631   1
   0  10  12 23.1190 2.42353  15
   0  10 -12 29.7080 3.00594  16
   0  10  12 30.5431 2.65326  16
   0 -10  12 29.6640 4.09342   8
   0  10  12 34.0296 2.56458  11
   0 -10  12 28.2515 4.77344   6
   0  10  13 4.71721 1.30804  15
   0  10 -13 6.22034 2.75552   1
   0 -10  13 3.89776 3.38657   7
   0  10  13 3.98599 1.54315  16
   0  10  13 2.38260 1.73128  14
   0 -10  13 2.36361 3.51046   6
   0  10 -13 7.52363 2.53382  10
   0  10 -13 6.85700 1.96200  16
   0 -10  13 3.81663 3.12842   8
   0  10 -14 22.8689 2.71344  16
   0 -10  14 21.0046 4.75131   6
   0  10  14 19.0527 2.09120  15
   0 -10  14 18.4682 3.83064   8
   0  10 -14 24.4091 3.40930   1
   0  10 -14 23.5635 3.72984   2
   0  10  14 14.6919 2.43952  14
   0  10 -14 21.9584 3.38054  10
   0  10  15 4.50080 1.99478  14
   0  10 -15 9.20105 2.98961  10
   0  10 -15 8.09695 2.12992  16
   0 -10  15 10.2980 4.47129   6
   0  10 -15 2.45429 2.72148   1
   0  10 -15 10.6189 3.37694   2
   0  10 -16 3.61047 2.86045   1
   0  10  16 3.45683 2.07451  14
   0  10 -16 1.79351 3.23486   2
   0 -10  16 6.02299 4.18477   6
   0  10 -16 6.24408 2.10035  16
   0  10 -16 3.75201 2.89168  10
   0 -10  16 0.87586 3.05677   8
   0  10 -17 2.66420 1.83417  16
   0 -10  17 3.08899 3.19605   8
   0  10 -17 1.11350 2.84186   1
   0 -11   0-1.07246 1.86644   6
   0 -11   0 1.79089 2.33044   8
   0  11   0 0.46667 1.64288   1
   0  11   0 0.28882 1.40525  10
   0 -11   0-1.03969 2.54742   7
   0 -11   1 13.9549 2.50675   6
   0  11   1 8.16815 2.21009   1
   0 -11  -1 16.3616 3.09075   8
   0 -11  -1 15.4232 2.37654   6
   0  11   1 11.5905 1.79499  10
   0  11  -1 12.3166 1.94306  16
   0 -11  -1 7.38367 2.67512   7
   0  11   1 10.7921 1.92831  16
   0  11  -1 10.8562 2.18723   1
   0 -11   1 7.75199 2.73838   7
   0 -11   1 13.5983 3.04015   8
   0  11   2-0.62658 1.44102  10
   0  11  -2 2.09663 0.47590  15
   0  11   2 1.54162 1.67194   1
   0  11   2 0.31003 2.30499   7
   0 -11  -2 5.04929 2.50225   8
   0 -11   2 1.50882 2.42435   8
   0  11   2 2.66200 1.62292  16
   0 -11   2 1.31968 2.14955   6
   0  11  -2 0.24955 1.86586   1
   0 -11  -2 3.98056 1.73073   6
   0 -11  -2-0.59337 2.10365   7
   0 -11   2 4.69457 3.02233   7
   0  11  -2 4.43486 1.46442  10
   0  11   2 1.63638 1.36897  10
   0  11   3 4.72291 1.64021  10
   0  11  -3 6.95833 2.18090   1
   0 -11   3 5.39050 2.81777   8
   0  11   3 5.73423 2.21691   7
   0 -11  -3 6.70726 2.01598   7
   0 -11   3 3.94459 2.32280   6
   0  11  -3 4.45630 0.69554  15
   0  11  -3 5.05354 1.55188  10
   0 -11  -3 5.22269 2.44345   8
   0 -11  -3 9.31776 1.87584   6
   0  11   3 2.32542 2.36672   2
   0  11   3 7.25190 2.00565   1
   0  11   3 8.55969 1.75593  16
   0 -11  -4 0.82813 1.42557   6
   0  11   4-0.74840 1.92591   6
   0  11   4 0.58333 2.13282   7
   0  11  -4-0.79762 2.06214   1
   0  11   4-1.14132 1.54882  16
   0  11  -4 1.25860 1.52190  10
   0 -11   4-1.18146 2.40585   8
   0 -11  -4 3.78962 2.39202   8
   0 -11   4-0.42766 2.47235   7
   0 -11  -4 1.74802 1.86372   7
   0  11   4-2.60668 2.30797   2
   0  11   4-1.23409 1.82925   1
   0 -11  -5 28.7475 2.91463   7
   0  11   5 29.1130 3.42863   2
   0  11   5 27.0195 2.92690   6
   0  11  -5 32.4597 2.69217  16
   0  11   5 22.4160 3.06315   7
   0 -11   5 19.2711 3.51474   8
   0 -11   5 17.0768 3.26972   6
   0  11   5 28.8314 2.52651  16
   0  11   5 32.7148 2.79194   1
   0 -11   5 22.9246 3.89255   7
   0  11  -5 22.5058 3.09926   1
   0  11   5 21.7870 1.78972  14
   0  11   5 20.2382 1.52898  15
   0  11   6 2.38721 1.57667  16
   0  11   6-1.32120 1.53759   1
   0 -11   6 0.86126 2.83899   6
   0  11   6 1.15916 2.25867   2
   0  11  -6 0.37208 1.54708  16
   0  11   6 0.63018 0.91792  14
   0 -11   6 1.40268 2.96146   7
   0  11   6 1.89340 1.63260  11
   0 -11   6 3.28077 2.59763   8
   0  11   6 1.65529 2.13052   7
   0 -11   7 21.9184 3.82699   6
   0  11   7 17.3815 2.17117  16
   0 -11   7 10.0222 3.10562   8
   0  11   7 20.2642 2.23614  11
   0  11  -7 16.1748 2.34945  10
   0 -11   7 20.9172 3.86569   7
   0  11   7 11.4004 2.09822   1
   0  11  -7 20.7505 2.35899  16
   0  11   7 12.1177 1.21284  15
   0  11  -8 4.48825 1.92116  10
   0  11   8 5.97161 1.36205  14
   0 -11   8 5.76627 3.22768   6
   0  11   8 9.97231 2.00563  11
   0  11   8 6.37317 1.73990   1
   0 -11   8 5.54891 3.07954   7
   0  11  -8 6.50227 1.81284  16
   0  11  -8 5.71751 2.24084   1
   0  11   8 5.46100 1.70148  16
   0  11   9 1.33627 1.09487  13
   0  11   9 1.02585 1.81392  11
   0  11  -9 1.24865 2.08409   1
   0  11   9 1.85648 1.46999  16
   0  11  -9-1.38947 1.95569  10
   0 -11   9 2.02850 3.16680   6
   0  11   9-0.61678 1.45605   1
   0  11  -9 1.55308 1.66500  16
   0  11   9 0.14266 1.26922  14
   0  11  -9-2.07955 2.72550   2
   0 -11  10 10.1264 3.53298   8
   0 -11  10 7.00380 3.63525   7
   0  11 -10 11.0529 2.16970  16
   0  11 -10 7.71990 2.57304   1
   0 -11  10 7.98994 3.55080   6
   0  11  10 7.82332 1.28796  13
   0  11  10 12.2772 2.06186  11
   0  11 -10 16.5272 3.27214   2
   0  11  10 7.67129 1.80845  16
   0  11 -11 16.8968 3.49905   2
   0  11  11 14.5067 1.96188  16
   0  11 -11 11.7468 2.67805  10
   0  11  11 10.0984 1.92342  14
   0 -11  11 15.1688 3.63056   8
   0  11 -11 9.33289 2.77859   1
   0 -11  11 11.1826 3.73502   6
   0  11  11 14.5304 2.01546  11
   0  11 -12-1.18140 2.93906   2
   0  11 -12-1.02845 2.42726   1
   0  11  12 1.04395 1.46399  16
   0 -11  12-0.57064 3.18703   7
   0  11 -12 0.20437 1.65688  16
   0 -11  12-2.34292 3.60483   6
   0  11  12 0.19074 1.50653  14
   0  11  12 0.12107 1.41718  11
   0 -11  12-1.35759 3.03963   8
   0  11  13 8.09727 1.60458  16
   0  11 -13 3.69245 3.05507   2
   0 -11  13-0.91674 3.06818   8
   0  11  13 1.24345 1.54012  14
   0  11 -13 2.48169 2.44996   1
   0 -11  13 1.76770 3.60675   7
   0  11 -13 3.53283 1.95655  16
   0 -11  14 0.92729 3.15500   8
   0  11 -14 5.49327 2.66692   1
   0  11 -14-0.63254 1.93771  16
   0 -11  14 1.27543 4.06842   6
   0  11 -14 3.44667 2.80594   2
   0 -11  14 7.26299 3.80828   7
   0  11 -15 5.83291 3.51304   2
   0 -11  15 4.20386 3.17550   8
   0 -11  15 8.60799 4.43352   6
   0  11 -15 6.40975 2.95801   1
   0  11 -16 3.94539 2.14062  11
   0  12   0-0.25939 1.98405   1
   0 -12   0-1.95227 2.50704   8
   0 -12   0-1.09185 2.41454   7
   0 -12   0-1.37982 2.07020   6
   0  12   0 0.75930 1.70045  16
   0  12  -1 1.60731 1.90782   1
   0 -12  -1-0.24637 2.00639   6
   0  12   1 2.02076 1.86685   1
   0  12  -1-0.19191 1.73717  16
   0 -12   1 0.39167 2.72694   7
   0 -12   1 0.40046 2.48310   8
   0 -12  -1 1.68673 2.45443   7
   0 -12  -1 1.51992 2.55276   8
   0  12   2 6.33919 2.14261   1
   0 -12  -2 3.11851 2.39630   7
   0 -12   2 5.41073 2.95612   7
   0 -12  -2 1.47772 2.50761   8
   0 -12   2 1.23104 2.51764   8
   0  12  -2 6.58885 2.20960   1
   0  12  -2 1.16467 1.80709  16
   0 -12   2 5.10310 2.61221   6
   0  12   2 6.09415 1.84844  16
   0 -12  -3 0.28882 2.14485   7
   0 -12   3 0.41941 2.52374   8
   0  12  -3 1.69772 2.17431   1
   0 -12  -3 5.03448 2.71065   8
   0 -12   3-1.47667 2.74148   6
   0 -12   3 1.30545 3.04665   7
   0  12   3-0.91196 1.76451  16
   0  12   3-0.47223 1.95452   1
   0 -12  -4 5.61456 2.27683   7
   0  12   4 5.78029 1.92464  16
   0  12   4 6.14685 2.06027   1
   0 -12   4 2.56650 2.62981   8
   0 -12   4 7.54437 2.73213   6
   0  12  -4 3.49735 2.36131   1
   0 -12   4 3.18287 3.26838   7
   0  12  -5 0.30022 2.27437   1
   0  12  -5-0.40275 1.76603  16
   0  12   5 1.96620 1.87764  11
   0 -12   5 2.11735 3.06451   6
   0 -12   5 4.30195 3.00627   7
   0  12   5 0.87886 1.95451   1
   0 -12   5-1.74873 2.80711   8
   0 -12  -5 0.25246 1.82727   7
   0  12   5 1.07006 1.81578  16
   0  12  -6 3.09206 2.26604   1
   0 -12   6 1.34647 2.86592   6
   0  12  -6 2.24402 1.79484  16
   0 -12   6 2.48569 3.01798   7
   0  12   6 3.17727 1.71409  16
   0  12   6 2.51581 1.83754   1
   0  12   7 19.3577 2.57035  11
   0 -12   7 9.47661 3.50105   6
   0 -12   7 15.8634 3.78652   7
   0  12  -7 12.5777 2.34635  16
   0  12   7 14.8521 2.31033  16
   0 -12   7 14.0165 3.44969   8
   0  12   7 10.5766 2.16480   1
   0  12   8 8.83032 1.43874  13
   0 -12   8 8.49129 3.78622   7
   0 -12   8 8.95448 3.68610   6
   0 -12   8 10.5888 3.23842   8
   0  12   8 4.86269 1.75506   1
   0  12   8 9.34490 1.98394  16
   0  12  -9 2.32949 1.81643  16
   0  12   9-0.20707 2.11950  11
   0  12   9 0.85260 1.69375  16
   0 -12   9 2.20200 3.20921   7
   0  12  -9 0.74256 2.70118   2
   0  12  -9-2.37236 2.41330   1
   0 -12   9 4.69921 3.59301   6
   0  12 -10 1.71895 1.78035  16
   0  12  10 6.57033 1.81627  16
   0  12 -10 7.01497 2.82966   1
   0 -12  10 4.55699 3.59028   7
   0  12 -10 1.53993 2.78129   2
   0 -12  11-2.88397 3.51486   8
   0 -12  11 2.29239 3.77753   6
   0  12 -11 0.39950 3.04065   2
   0  12 -11-1.80044 2.59170   1
   0  12 -11 1.96677 1.91596  16
   0 -12  11 1.75453 3.40908   7
   0  12 -12-2.92311 3.20878   2
   0  12  12-0.16343 1.63205  16
   0 -12  12-2.91984 3.30892   8
   0 -12  12 0.59937 3.68883   6
   0 -12  12-3.60237 3.95751   7
   0  12 -12 2.43873 1.86479  16
   0  12 -12-0.37180 2.71889   1
   0  12 -13 10.8401 3.52637   2
   0  13   0-0.85574 2.26305   1
   0  13   0 0.82947 1.92683  16
   0 -13   0 2.11371 2.89167   8
   0 -13   0-1.13222 2.81673   7
   0  13   1 1.43616 1.82643  16
   0  13  -1 2.09484 1.92289  16
   0  13   1 0.55490 2.30722   1
   0 -13   1 2.03092 3.07767   7
   0 -13  -1 4.12038 2.83631   8
   0  13  -1-0.88284 2.49583   1
   0  13   2-1.33993 2.19109   1
   0 -13   2-3.53726 3.07809   8
   0  13  -2 1.48185 1.89606  16
   0 -13  -2-0.33064 2.40529   7
   0  13   2 0.81130 1.82921  16
   0 -13  -2 3.61008 2.94853   8
   0 -13   2-2.17556 3.04640   7
   0  13  -2-1.50706 2.47459   1
   0  13   3 5.47841 2.07247  11
   0 -13  -3-0.30416 2.18413   7
   0 -13   3 0.45218 2.80856   8
   0  13  -3 4.65552 2.58517   1
   0  13   3 2.85363 2.25619   1
   0 -13   3 4.10077 3.24854   7
   0  13   3 3.60691 1.99153  16
   0  13  -3 2.99430 1.89656  16
   0 -13   4 0.46153 2.81987   8
   0 -13   4 0.95248 3.01634   7
   0  13   4 0.25039 1.95160   1
   0  13   4 0.40118 2.03128  11
   0  13  -4 2.55330 2.41796   1
   0 -13  -4 0.85995 2.20315   7
   0 -13   5 2.81590 3.03367   8
   0  13  -5-0.65637 2.53398   1
   0  13   5 2.54488 2.03013  16
   0  13   5 0.24054 2.05515   1
   0  13   5 0.60288 2.00707  11
   0 -13   5-0.43136 2.78837   6
   0 -13   5-0.49661 3.33601   7
   0  13  -6 1.99457 1.85838  16
   0  13   6 1.21898 2.17247  11
   0 -13   6 1.43001 3.18299   8
   0  13   6 3.48739 2.03113  16
   0 -13   6-0.51680 3.49364   7
   0  13  -6-0.67466 2.61761   1
   0  13   6 0.92434 1.95291   1
   0 -13   7-0.53693 3.20601   7
   0  13   7 0.62215 2.15052  11
   0 -13   7-0.48739 3.33405   6
   0  13   7-0.95542 1.90300  16
   0  13  -7-0.69302 2.42624   1
   0 -13   7-1.94134 3.07374   8
   0  13   8 6.03264 2.42878  11
   0  13  -8 1.81233 1.91988  16
   0  13  -8 3.83224 3.07617   2
   0 -13   8 9.45485 3.94489   7
   0  13   8 3.96803 1.90139  16
   0 -13   9 10.9440 4.39205   7
   0  13   9 7.83098 2.06491  16
   0  13  -9 9.08549 3.39922   2
   0  13  -9 7.33805 2.26869  16
   0  13   9 9.36137 2.57281  11
   0 -13   9 13.3776 4.10399   6
   0  13  10-0.18369 1.83942  16
   0  13  10-1.49651 2.14943  11
   0 -13  10 2.24311 3.29556   6
   0  13  11 0.72266 1.79435  16
   0  14   0 0.30941 2.55125   1
   0 -14   0-1.93234 3.01184   7
   0 -14   0-3.62205 2.98483   8
   0  14   0-0.89627 2.05570  16
   0  14   0 0.22894 2.14844  11
   0  14  -1 1.58729 2.78716   1
   0 -14  -1 7.68911 2.84369   7
   0  14   1 0.29955 2.40192   1
   0 -14   1 0.92443 3.34778   8
   0 -14  -1 0.44259 2.84528   8
   0 -14   1 4.16034 3.25986   7
   0  14  -1 3.17111 1.91076  16
   0  14   1 2.88504 2.12620  16
   0  14   2-0.29110 2.33997   1
   0  14   2 0.21959 2.10517  16
   0  14   2 0.89716 2.23333  11
   0 -14   2-2.68149 3.35211   7
   0  14  -2 0.22869 2.15891  16
   0  14  -2 0.32690 2.60494   1
   0  14  -3-1.00857 2.42008   1
   0  14   3 0.21744 2.09762  16
   0  14  -3 2.08014 2.09898  16
   0  14   3 1.12796 2.20211  11
   0 -14   3-0.93825 3.19008   7
   0  14   3 2.25623 2.36311   1
   0  14  -4-3.45469 2.77850   1
   0  14   4-0.27237 2.18184   1
   0  14   5 5.73421 2.26922  16
   0  14   5 6.96381 2.57422  11
   0  14   6 3.91198 2.57722  11
   0  14   6-0.42057 2.12439  16
   0  14   7-0.41386 2.10641  16
   0  14   8 1.39597 2.42612  11
   0  14   9 1.20675 2.09655  16
   0  14   9 0.21029 2.29100  11
   0  15   2-0.31304 2.45042   1
   1   0 -24-0.47289 3.19608   2
   1   0 -23 2.13791 3.14147  10
  -1   0  23-1.90933 2.71936   7
  -1   0  23-1.00059 2.25487  15
  -1   0  23-1.87601 2.39326  14
   1   0 -22 16.1887 3.61231  10
  -1   0  22 15.5919 2.97195  14
   1   0 -22 14.4594 3.35647   2
  -1   0  22 15.3532 2.69103  15
  -1   0  21-2.35223 1.92617  15
   1   0 -21 1.43461 2.81061  10
   1   0 -21 2.00544 2.76021   2
  -1   0  21-1.05006 2.51965   7
  -1   0  20 3.28305 1.17282   8
  -1   0  20 9.09816 1.98242  15
   1   0 -20 6.02165 2.79445   2
   1   0 -20 4.05298 2.88501  10
  -1   0  19 0.21587 0.80197  16
   1   0 -19-1.05415 1.38567   5
  -1   0  19 0.43081 1.08441   8
   1   0 -19-0.42337 2.46782  10
  -1   0  19 0.51648 1.52976  15
  -1   0  19-0.63021 1.50125  13
  -1   0  19 0.93686 2.16141   7
   1   0 -19 1.40909 2.49420   2
  -1   0  18-0.14682 1.41019  13
  -1   0  18 1.48510 1.13119   8
   1   0 -18 1.94519 1.15800  13
  -1   0  18 1.44420 1.54775  15
  -1   0  18 1.47170 2.07421   7
   1   0 -18 0.98635 2.18271   2
   1   0 -18 5.54510 2.42118  10
  -1   0  18 1.03828 0.80827  16
   1   0 -18 3.12438 1.37244   5
   1   0 -17 0.40791 1.04363  13
  -1   0  17-1.36696 1.29054  13
  -1   0  17 0.34858 1.00767   8
  -1   0  17 1.10113 1.80288   7
   1   0 -17-0.07577 0.75669   1
  -1   0  17 0.89678 1.43943  15
   1   0 -17 0.52857 1.22791   5
   1   0 -17 0.36977 2.19048  10
  -1   0  17 0.39633 0.78115  16
   1   0 -17 2.13842 2.01364   2
  -1   0  16 8.72895 1.65788  15
  -1   0  16 6.31717 1.33019  13
  -1   0  16 11.8678 2.16133   7
  -1   0  16 5.56541 2.35275  10
  -1   0  16 10.2442 2.81425   4
   1   0 -16 10.7471 1.35189  13
   1   0 -16 8.71327 1.12961   1
   1   0 -16 9.34477 2.14465   2
  -1   0  16 6.65245 0.97581  16
  -1   0  16 9.03425 1.31259   8
   1   0 -16 5.83393 2.11806  10
   1   0 -15 0.27003 0.94542  13
   1   0 -15-0.13068 0.45903   3
   1   0 -15-1.30188 1.68299   2
  -1   0  15-1.14139 1.03295  13
  -1   0  15 0.30351 1.90874  10
  -1   0  15 1.40907 2.36623   4
   1   0 -15-0.48128 0.48230   3
   1   0 -15 0.07889 0.75420   1
  -1   0  15-1.34163 1.24713  15
  -1   0  15 0.17464 0.73490  16
  -1   0  15-0.96209 1.61566   7
   1   0 -15 0.31763 1.75816  10
  -1   0  15 0.80738 1.54372   2
  -1   0  15-0.32910 0.98259   8
  -1   0  14 28.3649 2.37119   8
   1   0 -14 35.0128 2.36246  13
   1   0 -14 33.5569 2.66593  15
  -1   0  14 38.1618 3.47647  10
   1   0 -14 32.0536 1.99102   3
   1   0 -14 30.2038 2.01689   3
  -1   0  14 29.2717 2.87912   2
   1   0 -14 31.7103 2.27106   1
   1   0 -14 30.3174 3.08017   2
  -1   0  14 28.0150 3.54079   4
   1   0 -14 31.0390 3.29065  10
  -1   0  14 28.9861 2.39642  13
  -1   0  14 22.4930 2.62462  15
  -1   0  14 32.6037 3.10912   7
  -1   0  14 29.4442 2.10390  16
  -1   0  13 0.85558 1.53264   2
   1   0 -13 0.13988 0.96267  15
  -1   0  13-0.25813 1.66852  10
  -1   0  13 1.09674 0.58270  16
   1   0 -13 0.65275 1.36845   2
   1   0 -13 0.78116 0.43670   3
  -1   0  13 0.64091 0.98631  15
  -1   0  13-0.28477 0.88508  13
  -1   0  13 1.79944 1.93852   4
   1   0 -13-0.30166 0.67804   1
  -1   0  13-0.38849 0.80087   8
   1   0 -13-0.31489 0.80795  13
   1   0 -13-0.26900 1.41973  10
  -1   0  12 0.89829 0.75574   8
   1   0 -12 2.41320 0.76142  13
   1   0 -12 0.73675 1.42459  10
  -1   0  12 2.60106 1.57296  10
   1   0 -12 2.42263 0.45676   3
  -1   0  12 2.35296 1.32973   2
  -1   0  12 1.30649 0.86114  15
   1   0 -12 2.08331 0.69246   1
   1   0 -12 2.18012 0.91557  15
  -1   0  12 2.06273 0.79694  13
  -1   0  12 2.00578 0.56515  16
  -1   0  12 1.64796 1.84862   4
   1   0 -12 2.36906 0.79741   5
   1   0 -12 1.96723 1.37449   2
   1   0 -11 0.07498 0.63061   5
   1   0 -11 0.26860 1.43160   4
   1   0 -11-0.06479 0.20538  12
  -1   0  11 0.56645 0.64766   8
   1   0 -11-0.33503 0.61249   1
   1   0 -11 0.13289 0.36442   3
   1   0 -11-0.20234 0.66971  13
  -1   0  11 0.64641 1.49132  10
  -1   0  11 0.24980 1.60375   4
   1   0 -11-0.23364 0.85425  15
  -1   0  11 0.15465 0.65799  13
  -1   0  11 2.57552 1.16492   2
  -1   0  11-0.28904 0.46939  16
  -1   0  10 152.907 10.2564   4
   1   0 -10 157.017 9.48960   5
   1   0 -10 152.146 9.30555   3
   1   0 -10 158.212 9.22406  12
   1   0 -10 169.364 9.49562  13
   1   0 -10 165.992 9.70019  15
   1   0 -10 160.142 9.47352   1
  -1   0  10 168.921 10.2205  10
  -1   0  10 156.707 9.52460   8
  -1   0  10 152.745 9.81605   2
  -1   0  10 164.834 9.52256  13
  -1   0  10 156.706 9.34268  16
   1   0  -9-0.01431 0.19837  12
  -1   0   9-0.11536 0.92331   2
  -1   0   9 0.06561 0.36726  16
  -1   0   9-0.60434 1.37794   4
   1   0  -9 0.05657 0.51533   1
  -1   0   9 0.69600 1.19726  10
   1   0  -9-0.18864 0.64517  15
   1   0  -9 0.51213 0.52187   5
  -1   0   9-0.30921 0.51808  13
   1   0  -9 0.38966 0.54645  13
  -1   0   9 0.26088 0.60601   8
   1   0  -8 1.26259 0.50574   5
  -1   0   8 0.71167 0.47772  13
   1   0  -8 1.62560 0.52028   1
  -1   0   8 0.57856 0.50601   8
  -1   0   8 1.89322 0.44378   1
  -1   0   8 0.88921 1.24759   4
   1   0  -8 2.14495 0.54649  13
  -1   0   8 1.99752 1.16651  10
  -1   0   8 1.02578 0.35567  16
   1   0  -8 1.31067 0.85195   2
   1   0  -8 2.16458 0.71280  15
   1   0  -8 1.07128 0.22760  12
  -1   0   8 2.00942 0.30202   9
   1   0  -7 0.10813 0.18027  12
   1   0  -7 0.26880 0.42033   1
   1   0  -7 0.10049 0.70758   2
   1   0  -7 0.30691 0.43662  13
  -1   0   7 0.07279 0.31528  16
   1   0  -7-0.25369 0.27444  16
  -1   0   7 0.15462 1.19927   4
  -1   0   7 0.37698 0.30478   9
  -1   0   7-0.30068 0.47017   8
   1   0  -7 0.24164 0.40666   5
  -1   0   7 0.40061 1.05945  10
  -1   0   7 0.22713 0.35264   1
   1   0  -7 0.28925 0.56606  15
   1   0  -6 1.61701 0.27385  16
   1   0  -6 1.76559 0.22870  12
  -1   0   6 1.38139 0.48168   8
   1   0  -6 1.66721 0.37031   5
   1   0  -6 1.67155 0.43225  13
  -1   0   6 1.34018 0.34392   9
  -1   0   6 1.28443 0.30372  16
   1   0  -6 1.18359 0.23718   9
  -1   0   6 1.05278 1.14833   4
   1   0  -6 1.16757 0.51526  15
   1   0  -6 1.92217 0.69383   2
  -1   0   6 0.79537 0.95920  10
   1   0  -6 1.20852 0.44412   1
  -1   0   6 0.80684 0.40290   1
   1   0  -5 0.11540 0.16818  12
  -1   0   5 0.56402 0.91211  10
   1   0  -5-0.16662 0.38942   1
   1   0  -5 0.15220 0.44492  15
   1   0  -5 0.26610 0.57051   2
   1   0  -5-0.01457 0.21329   9
  -1   0   5 0.53651 0.22978  16
  -1   0   5 0.14307 0.38036   1
  -1   0   5 0.54440 0.97856   4
  -1   0   5 0.49409 0.33004   9
   1   0  -5 0.12713 0.29961   5
   1   0  -5 0.73368 0.35245  13
   1   0  -5-0.04817 0.19271  16
  -1   0   4 450.768 25.6998  10
   1   0  -4 442.864 25.4612   1
   1   0  -4 450.836 25.3896   9
   1   0  -4 428.856 25.4482  13
   1   0  -4 448.835 25.3725  12
   1   0  -4 424.701 25.3769  16
  -1   0   4 389.004 25.7179   4
   1   0  -4 438.839 25.5210  15
  -1   0   3-0.06474 0.68331   4
  -1   0   3 0.72021 0.61747  10
   1   0  -3 0.13613 0.13574  12
   1   0  -3-0.17753 0.31930  15
   1   0  -3 0.15717 0.27078   1
   1   0  -3 0.01954 0.22830  13
  -1   0   2 214.961 11.7301  17
   1   0  -2 203.998 11.6178  13
  -1   0   2 178.088 11.7529   4
  -1   0   2 193.538 11.7401  10
  -1   0  -1-0.09268 0.23715  14
  -1   0  -2 566.188 35.9344  15
  -1   0  -2 661.875 35.8656  13
  -1   0  -2 657.506 35.9464   7
   1   0   2 644.423 36.0050   2
   1   0   2 635.233 36.0367  10
   1   0   2 621.752 35.9024   5
   1   0   2 575.166 35.8616  16
   1   0   3 0.71553 0.63904   2
  -1   0  -3-0.28253 0.45784  15
  -1   0  -3-0.01965 0.25398  13
   1   0   3-0.06683 0.76458  10
   1   0   4 58.5941 4.00403  10
   1   0   4 59.1099 3.65029   8
  -1   0  -4 60.6930 3.78547  15
  -1   0  -4 61.4142 3.62558   8
   1   0   4 68.4146 4.15939   4
  -1   0  -4 57.9684 3.72600   5
  -1   0  -4 63.2128 3.65394  13
   1   0   4 57.8811 3.90472   2
  -1   0  -5 0.12490 0.30046   8
   1   0   5 0.60398 0.42159   8
  -1   0  -5 0.27924 0.45050   5
  -1   0  -5 0.06392 0.36522  13
  -1   0  -5 0.50112 0.26800   9
   1   0   5 0.14685 0.67357   7
   1   0   5 0.40833 0.73410   2
  -1   0  -5-0.30552 0.56061  15
   1   0   5 1.89955 1.10637   4
   1   0   5-0.31912 0.95941  10
  -1   0  -6 3.00450 0.72324  15
   1   0   6 4.48215 0.96144   2
   1   0   6 3.80749 0.87049   7
  -1   0  -6 3.34058 0.50206  13
  -1   0  -6 3.36811 0.57617   5
  -1   0  -6 2.70025 0.39020   9
   1   0   6 2.15006 1.05398  10
   1   0   6 2.97130 0.51429   8
   1   0   6 3.79870 0.55112  13
   1   0   6 1.93526 1.18447   4
   1   0   6 2.95252 0.44120  16
  -1   0  -6 3.29940 0.44815   1
  -1   0  -7-0.04454 0.42188  13
   1   0   7 0.09443 0.46085   8
   1   0   7 0.07417 0.40967  16
   1   0   7 0.10011 0.47556  13
   1   0   7 0.51967 0.80242   7
  -1   0  -7-0.16481 0.63323  15
   1   0   7 1.36850 1.29572   4
  -1   0  -7 0.07952 0.40907   1
   1   0   7 0.44007 1.06710  10
  -1   0  -7-0.31458 0.53336   5
  -1   0  -7 0.32130 0.29427   9
  -1   0  -8 627.828 34.9915  13
  -1   0  -8 613.543 34.9697   1
   1   0   8 642.237 35.6068  10
   1   0   8 632.108 35.7420   4
   1   0   8 592.234 35.0217  13
   1   0   8 595.810 34.9319  16
  -1   0  -8 638.618 35.2201  15
  -1   0  -8 590.702 34.8272   9
   1   0   8 592.675 35.3250   7
   1   0   8 573.406 34.9860   8
  -1   0  -8 595.853 35.0812   5
   1   0   9 0.84170 0.55879   8
  -1   0  -9-0.37823 0.51344   1
   1   0   9 0.86689 0.48654  16
   1   0   9-0.75047 1.27576  10
   1   0   9 0.54154 0.94256   7
  -1   0  -9 0.21234 0.50754   3
   1   0   9-0.33023 0.61777  13
  -1   0  -9 0.05594 0.53969  13
  -1   0  -9 0.80902 0.71710   5
  -1   0  -9 0.10453 0.74021  15
   1   0   9-0.43485 1.53093   4
   1   0  10 147.561 8.74544  10
   1   0  10 124.493 8.31344   7
  -1   0 -10 126.597 7.83827   3
   1   0  10 119.278 7.86764   8
   1   0  10 143.842 8.88341   4
  -1   0 -10 148.312 8.20372  15
   1   0  10 124.726 7.80294  16
  -1   0 -10 137.403 7.88342  13
  -1   0 -10 136.987 7.88095   1
   1   0  10 128.087 7.92270  13
  -1   0 -11 0.66376 0.56818   3
   1   0  11-0.23043 1.52868  10
  -1   0 -11 0.72468 0.65994   1
  -1   0 -11 1.61813 1.31616   2
  -1   0 -11 0.47014 0.60389  13
   1   0  11-0.58734 0.76719  13
   1   0  11 0.16808 1.16350   7
  -1   0 -11-0.23675 1.39139  10
   1   0  11 0.35294 0.64551   8
  -1   0 -11-0.38154 0.89061  15
   1   0  11 1.16545 0.96043  15
   1   0  11-1.32914 1.77461   4
   1   0  11 0.38119 0.62859  16
  -1   0 -12 58.6532 3.66083   1
  -1   0 -12 58.0530 3.67137  13
   1   0  12 53.8432 4.73927   4
  -1   0 -12 58.4733 3.61603   3
   1   0  12 58.0618 3.60281  16
   1   0  12 58.0424 4.32185   2
   1   0  12 57.8976 4.28499   7
   1   0  12 56.7939 3.67604   8
  -1   0 -12 61.0682 4.03072  15
   1   0  12 50.0343 4.04626  15
   1   0  12 53.7560 4.60202  10
   1   0  12 47.0516 3.69240  13
  -1   0 -12 54.0936 4.32589   2
  -1   0 -12 60.1406 4.61035  10
   1   0  13-0.63376 2.06180   4
   1   0  13-1.01924 1.04033  13
   1   0  13 0.27492 1.84666  10
   1   0  13 0.17513 1.10147  15
  -1   0 -13-1.70695 1.53357   2
  -1   0 -13-0.45159 1.04194  15
   1   0  13 0.63170 0.71670  16
  -1   0 -13 0.97465 0.79932   1
   1   0  13 0.38165 0.77078   8
   1   0  13 0.19197 1.66474   2
  -1   0 -13 0.62363 0.76093  13
  -1   0 -13 1.42078 1.70986  10
  -1   0 -13 0.52588 0.66019   3
   1   0  13 0.20095 1.27269   7
   1   0  14 140.036 8.36077  16
   1   0  14 135.208 8.39721   8
  -1   0 -14 135.485 8.68014   5
  -1   0 -14 142.620 8.37081   3
  -1   0 -14 149.688 8.46990  13
   1   0  14 144.454 9.17469   7
  -1   0 -14 143.123 8.87323  15
   1   0  14 141.300 9.83067   4
   1   0  14 119.712 8.85733  15
  -1   0 -14 144.189 8.43021   1
   1   0  14 149.117 9.18661   2
   1   0  14 122.088 8.52279  13
  -1   0 -14 134.187 9.52786  10
  -1   0 -14 135.141 9.31671   2
   1   0  14 134.771 9.55886  10
   1   0  15 0.28847 0.80739  16
  -1   0 -15 1.10863 0.86460   1
   1   0  15-0.23770 1.67363   7
  -1   0 -15 0.49414 0.70295   3
  -1   0 -15 0.17472 1.22328  15
   1   0  15-1.92256 2.28131  10
   1   0  15-1.11647 2.27352   4
   1   0  15-0.82659 1.27183  15
   1   0  15-0.44344 1.71170   2
  -1   0 -15-0.28702 1.76646   2
  -1   0 -15 1.00240 1.96359  10
  -1   0 -15-0.84458 1.14124   5
   1   0  15 0.07521 0.78189   8
  -1   0 -15 0.52958 0.88137  13
  -1   0 -16 95.6610 6.92743   2
   1   0  16 88.6918 6.44756  15
  -1   0 -16 91.4297 7.16002  10
  -1   0 -16 79.0916 6.01492   5
  -1   0 -16 88.6198 5.70078   1
   1   0  16 95.6993 5.71169  16
  -1   0 -16 93.2368 5.68125   3
  -1   0 -16 97.6336 5.82833  13
   1   0  16 85.5842 6.61861   7
  -1   0 -17 0.97557 1.35762   5
   1   0  17 0.24347 0.93572  16
  -1   0 -17 1.99494 2.19213   2
   1   0  17 0.27021 1.68796  14
  -1   0 -17 0.77105 2.17287  10
  -1   0 -17 0.39595 1.02487  13
   1   0  17-0.27244 2.00316   7
   1   0  17 1.78699 0.80467   8
   1   0  17 0.71899 1.60061  15
  -1   0 -18 66.7598 5.88486  10
  -1   0 -18 62.0301 4.75946   5
   1   0  18 63.1465 5.30376  14
   1   0  18 52.3135 5.20507   7
   1   0  18 64.6236 4.33231  16
  -1   0 -18 77.9527 4.52749  13
  -1   0 -19-1.31819 2.62405  10
  -1   0 -19-1.09289 1.64352   5
  -1   0 -19-1.90484 2.42991   2
   1   0  19 0.61330 2.14761   7
  -1   0 -20 48.6960 5.39957  10
  -1   0 -20 47.4782 5.03335   2
   1   0  20 43.6654 4.58627   7
   1   0  20 50.7718 4.58050  14
   1   0  21-1.05299 2.29869  14
  -1   0 -21-0.85965 2.99216   2
   1   0  21 1.00288 2.39308   7
  -1   0 -21 0.99382 3.31709  10
   1   0  22 3.81530 2.60041   7
   1   0  22 11.1264 2.69148  14
  -1   0 -22 8.61997 3.27763   2
  -1   0 -23-1.42960 3.33713   2
   1   0  23-1.17542 2.43010  14
   1  -1 -24 1.37199 3.12826   2
   1   1 -24 0.97409 3.33151   2
  -1  -1  24-1.72057 2.79867   7
  -1  -1  23 1.35326 2.08214  15
  -1  -1  23 0.37231 2.24024  14
  -1   1  23 1.50788 2.45271  14
   1   1 -23-2.31164 2.98822   2
   1  -1 -23-0.43547 3.13425   2
  -1  -1  23-2.08367 2.99939   7
   1  -1 -23 2.13028 3.02708  10
  -1   1  22 11.0751 2.83023   7
  -1  -1  22 10.9172 2.73574  14
   1   1 -22 11.7847 3.41923   2
  -1  -1  22 9.86748 2.48122  15
   1  -1 -22 7.03025 2.88579   2
  -1  -1  22 8.78419 3.03310   7
  -1   1  22 2.13396 2.34843  14
   1   1 -21 12.7717 3.30913   2
  -1  -1  21 7.64063 2.92554   7
   1  -1 -21 8.60159 2.90533   2
  -1   1  21 7.38137 2.37891  14
  -1  -1  21 10.1495 2.25420  15
   1  -1 -21 6.18045 3.21536  10
  -1   1  21 9.88390 2.52627   7
   1   1 -20-0.49854 1.60293   5
   1  -1 -20-0.73561 2.60428   2
  -1   1  20 0.30244 2.03165   7
  -1  -1  20 0.96842 1.31843   8
  -1  -1  20 0.27913 1.66678  15
   1   1 -20-1.54846 2.67940   2
   1  -1 -20 2.68725 2.71567  10
  -1  -1  20-2.91580 2.60922   7
  -1   1  20-1.86501 1.49914  13
   1  -1 -19 1.37915 2.33064   2
  -1   1  19-0.43508 1.30867  13
  -1  -1  19 0.14487 1.29833   8
  -1  -1  19 0.24035 0.86774  16
  -1  -1  19 2.87331 1.86028  15
  -1  -1  19 1.37039 2.25868   7
   1  -1 -19 0.74416 1.29144   5
   1   1 -19 2.19504 1.39519   5
   1  -1 -19 3.78808 2.55242  10
  -1   1  19 1.14255 2.07835   7
   1   1 -18-1.05840 1.19386  13
  -1  -1  18-0.96941 2.15710   7
  -1  -1  18 0.73118 1.52196  15
   1  -1 -18 2.35569 2.48641  10
   1   1 -18 0.87579 1.32983   5
  -1   1  18-0.27002 1.32541  13
  -1  -1  18 2.50459 1.33774   8
   1   1 -18 2.46633 1.18905   1
   1  -1 -18-1.30759 1.19883  13
  -1   1  18 1.61378 1.86160   7
   1   1 -18-0.67707 2.23147   2
   1  -1 -18 0.13947 1.16389   5
  -1   1  18 0.06220 0.77823  16
  -1  -1  18-0.07715 0.89582  16
   1  -1 -18 1.28699 2.14784   2
  -1  -1  17 2.84092 1.43084  13
   1   1 -17 1.42045 1.16006   1
  -1   1  17 3.23347 1.89162   2
  -1  -1  17 2.05947 0.88184  16
  -1   1  17 3.54158 1.84202   7
   1  -1 -17 3.02539 1.02133  13
  -1  -1  17 5.29128 1.39844   8
   1   1 -17 3.57798 1.20953  13
   1  -1 -17 1.83239 2.05711  10
  -1   1  17 4.17786 1.19585  13
   1   1 -17 5.22959 0.74025   3
  -1   1  17 4.20751 0.82466  16
  -1  -1  17 2.94930 1.49996  15
   1   1 -17 3.81487 1.22485   5
  -1  -1  17 6.65702 2.29008   7
  -1   1  17 2.98626 0.96035   8
   1   1 -17 4.40357 2.09665   2
   1  -1 -17 1.19508 2.04185   2
   1  -1 -16 16.8584 2.41983   2
   1  -1 -16 12.0701 1.36413  13
  -1   1  16 10.4303 2.07424   7
  -1  -1  16 16.4690 2.63903   7
   1   1 -16 11.1646 1.49061   1
   1   1 -16 9.67892 1.18650   3
  -1   1  16 8.15864 2.72592   4
   1   1 -16 9.06520 1.51298   5
  -1  -1  16 13.6555 2.76335  10
   1   1 -16 10.4192 2.56254  10
  -1  -1  16 10.9726 1.65523   8
   1   1 -16 12.9414 1.47728  13
  -1   1  16 10.8102 1.10862  16
  -1  -1  16 12.8346 1.88666  15
  -1  -1  16 12.9081 1.26366  16
  -1  -1  16 11.4916 2.87399   4
  -1   1  16 12.8764 2.16457   2
   1  -1 -16 14.6544 2.64321  10
  -1   1  16 10.9474 1.34090   8
   1   1 -16 12.5997 1.09480   3
  -1  -1  16 11.3012 1.65867  13
  -1   1  16 12.0026 1.55679  13
   1   1 -16 12.2357 2.38745   2
   1  -1 -15 11.0406 2.37663  10
   1  -1 -15 12.2365 2.22019   2
  -1  -1  15 10.8547 2.50430  10
  -1  -1  15 10.8822 1.60262  13
  -1  -1  15 14.3131 2.33254   7
   1   1 -15 11.6429 0.88986  12
   1   1 -15 10.2625 1.10310   3
  -1  -1  15 12.7935 1.25837  16
   1   1 -15 14.2059 1.49089  13
   1   1 -15 16.2911 0.95327  11
  -1   1  15 11.0955 1.34188   8
  -1  -1  15 11.6993 2.64809   4
  -1   1  15 16.3760 2.21936   2
   1  -1 -15 13.8324 1.36098  13
   1   1 -15 13.4064 1.25411   3
  -1   1  15 12.4339 1.14344  16
   1   1 -15 14.7490 2.39925   2
  -1  -1  15 10.8396 1.64335   8
  -1   1  15 9.74643 2.63369   4
  -1  -1  15 11.6842 1.73189  15
   1   1 -15 10.3002 2.47932  10
   1   1 -15 10.5096 1.50726   1
  -1   1  15 15.3945 1.48051  13
   1  -1 -15 13.4352 0.96821   1
  -1  -1  14 1.23337 1.72731   7
  -1   1  14 0.48295 0.60291  16
  -1   1  14 1.00147 2.05473   4
  -1  -1  14-0.27855 1.78861  10
  -1  -1  14-0.23883 1.03985  13
   1   1 -14 1.00345 0.71032   3
   1   1 -14 1.95329 1.58893   2
  -1   1  14 1.29810 1.44531   2
   1   1 -14 0.67725 0.37152  12
   1  -1 -14 1.77286 0.82429  13
  -1  -1  14 0.52976 1.09223   8
  -1  -1  14-1.27082 2.05371   4
  -1   1  14-0.40135 0.73442   8
   1  -1 -14-1.74548 1.76417  10
  -1  -1  14 0.80610 0.68090  16
  -1  -1  14-0.53695 1.14177  15
  -1   1  14 0.75219 0.72657  13
   1   1 -14 0.32854 0.96415   1
   1   1 -14 1.32741 0.96041  13
   1  -1 -14-0.46795 1.44032   2
   1   1 -14 0.59402 1.67385  10
   1  -1 -14 0.54343 0.42233   1
  -1  -1  13 1.14307 1.51203   7
  -1   1  13 4.20520 0.83743   8
  -1  -1  13 4.25846 1.07837  13
   1   1 -13 4.81201 0.57734   9
   1   1 -13 3.01598 1.76931  10
   1  -1 -13 5.51620 0.59907   1
  -1  -1  13 5.08767 0.80099  16
   1   1 -13 2.49696 0.90194  13
  -1  -1  13 3.27465 1.18437  15
   1  -1 -13 4.99098 0.90469  13
   1  -1 -13 4.53542 0.97415   5
   1  -1 -13 5.12336 1.60832   2
  -1  -1  13 1.75464 1.90957   4
  -1  -1  13 6.09481 1.22649   8
  -1  -1  13 3.59073 1.88539  10
  -1   1  13 3.38174 1.95232   4
  -1   1  13 5.56539 0.68324  16
   1   1 -13 5.07305 0.52773  12
  -1   1  13 4.60641 1.53615   2
   1   1 -13 3.10959 1.44214   2
   1   1 -13 4.88918 1.00699   1
   1  -1 -13 2.66884 1.46178  10
  -1   1  13 5.82477 0.94400  13
   1   1 -12 45.1674 4.21968  10
   1  -1 -12 48.7477 3.98851   2
  -1  -1  12 55.9080 4.51738   4
  -1   1  12 49.5794 3.90321   2
   1   1 -12 51.1017 3.31240  16
   1   1 -12 54.7006 4.15692   2
   1   1 -12 55.0777 3.15288  12
  -1  -1  12 53.1694 4.14725   7
  -1   1  12 52.5618 3.37680   8
  -1  -1  12 49.9668 3.74897  15
   1  -1 -12 54.9347 3.38974  13
  -1   1  12 51.3239 4.46188   4
  -1   1  12 50.6673 3.22047  16
   1  -1 -12 56.2363 4.24802  10
   1   1 -12 50.1852 3.19957   9
  -1   1  12 50.7848 3.42293  13
   1  -1 -12 51.0689 3.46644   5
   1   1 -12 52.0014 3.52926   1
  -1  -1  12 52.1789 4.33399  10
  -1  -1  12 51.7633 3.30167  16
  -1  -1  12 48.5953 3.52248  13
   1   1 -12 55.3968 3.49706  13
   1  -1 -12 51.1943 3.18681   1
  -1  -1  12 49.3633 3.63497   8
   1   1 -11 64.6443 4.00251  16
  -1  -1  11 65.4096 4.00083  16
  -1  -1  11 64.4698 4.41127  15
   1  -1 -11 60.7032 4.78102  10
   1   1 -11 62.0273 3.95274   9
   1   1 -11 66.6910 4.15860  13
   1  -1 -11 70.1932 4.07965  13
  -1   1  11 62.9538 4.50176   2
   1  -1 -11 64.4788 3.85187   3
  -1  -1  11 56.4295 4.87899   4
   1   1 -11 60.4923 4.85891  10
   1   1 -11 66.3309 4.25223   1
  -1  -1  11 66.4888 4.74435   7
  -1  -1  11 65.0394 4.30495   8
  -1   1  11 63.2066 4.05166   8
   1   1 -11 66.1982 4.68728   2
   1   1 -11 67.2577 4.16514   5
  -1   1  11 63.4026 3.92922  16
   1  -1 -11 64.5255 3.91222   1
   1  -1 -11 60.7273 4.13792   5
  -1  -1  11 69.5377 4.94652  10
  -1  -1  11 63.8012 4.21072  13
  -1   1  11 71.5702 5.17569   4
  -1   1  11 64.7910 4.11107  13
   1  -1 -10 26.2817 1.83217  13
  -1  -1  10 26.7472 2.74640   4
   1   1 -10 27.9647 1.94484  13
  -1  -1  10 25.2503 1.76527  16
   1  -1 -10 25.7088 1.63389   3
  -1  -1  10 26.4959 2.56421  10
  -1   1  10 27.8561 1.90906  13
   1  -1 -10 25.8852 2.10241  15
   1  -1 -10 25.2445 1.90333   5
   1   1 -10 24.0856 1.75414  16
   1  -1 -10 26.2833 1.68718   1
  -1   1  10 25.0084 1.69157  16
  -1  -1  10 26.6258 1.96467  13
  -1   1  10 25.6975 1.81387   8
  -1   1  10 26.1343 2.79519   4
   1   1 -10 24.5680 1.96854   1
  -1   1  10 29.4777 2.32535   2
   1   1 -10 27.8319 1.77468   9
  -1  -1  10 23.9174 2.04273   8
  -1  -1   9 89.4684 5.46090  16
   1  -1  -9 94.5918 5.75499  15
   1  -1  -9 92.6862 5.39644   1
  -1   1   9 92.4184 5.88017   2
  -1   1   9 88.2931 6.32659   4
  -1   1   9 77.3485 5.47864   8
   1   1  -9 94.7193 5.47194  16
  -1  -1   9 88.0819 6.29550   4
  -1   1   9 86.9548 5.39407  16
  -1   1   9 90.2223 5.54241  13
  -1  -1   9 86.1318 5.71249   8
   1  -1  -9 89.2837 5.56445   5
   1   1  -9 92.1943 5.67880   1
   1   1  -9 96.1122 5.60755  13
   1   1  -9 95.8736 5.49258   9
   1  -1  -9 90.2292 5.35961   3
  -1  -1   9 94.4078 6.18403  10
  -1  -1   9 94.9361 5.50348   9
   1  -1  -9 96.5740 5.52391  13
   1   1  -8 6.07499 0.71626   9
   1  -1  -8 7.96896 0.80004   5
   1  -1  -8 8.41607 0.74953  13
  -1  -1   8 8.58781 0.81411   1
   1   1  -8 6.97427 0.66104  16
   1   1  -8 7.33364 0.81513  13
  -1   1   8 7.55918 0.97179  15
  -1   1   8 3.65538 1.46845   4
   1  -1  -8 7.91222 0.96228  15
  -1  -1   8 4.31664 1.49708   4
  -1  -1   8 7.67460 0.94705   8
  -1   1   8 6.40939 0.72999  13
   1  -1  -8 6.89166 0.56641   3
  -1  -1   8 7.06496 1.37356  10
  -1  -1   8 8.52306 0.78745   9
   1  -1  -8 6.57032 0.58408   1
   1   1  -8 6.33238 0.88306   1
  -1   1   8 6.81957 1.08943   2
   1  -1  -8 5.00662 1.06352   2
  -1  -1   8 6.99171 0.68734  16
  -1   1   8 7.06079 0.60374  16
   1   1  -7 13.6308 1.13422  13
   1   1  -7 9.51251 1.19596   1
  -1   1   7 14.6995 1.45036   2
  -1  -1   7 16.7842 1.77666  10
  -1   1   7 13.6166 1.08685  13
  -1   1   7 10.6788 1.71531   4
   1  -1  -7 13.2688 1.04183  13
   1   1  -7 15.9311 1.12004   9
   1  -1  -7 13.4518 0.92824   1
   1  -1  -7 16.8168 0.86969  11
  -1  -1   7 14.5751 1.12928   1
  -1  -1   7 12.7284 1.77733   4
  -1  -1   7 12.2793 1.09947   9
   1   1  -7 13.4371 1.00011  16
  -1  -1   7 13.1517 1.26533   8
   1  -1  -7 11.6077 1.08876   5
  -1   1   7 9.77563 1.15601  15
  -1  -1   7 13.2644 1.01453  16
   1  -1  -7 9.77479 1.33605   2
  -1   1   7 13.5685 0.93096  16
  -1   1   7 13.6796 0.90241   1
  -1   1   6 2.58903 0.31706   1
  -1   1   6 2.75765 0.25548  12
  -1   1   6 2.76079 0.32646  16
  -1   1   6 1.90604 1.12059   4
  -1  -1   6 2.90674 0.58157   9
  -1  -1   6 0.89052 1.07840   4
   1   1  -6 2.75539 0.65875   8
   1  -1  -6 2.97483 0.31686   1
  -1   1   6 3.15048 0.43900   5
  -1  -1   6 1.26883 0.99526  10
   1  -1  -6 2.56791 0.49850   5
   1  -1  -6 3.22185 0.26602  11
  -1  -1   6 3.15158 0.67950   8
  -1  -1   6 3.03000 0.45210  16
   1  -1  -6 3.36762 0.43794  13
   1  -1  -6 1.78319 0.75717   2
   1   1  -6 2.35432 0.54079   9
   1   1  -6 2.56632 0.52967  13
   1   1  -6 2.36552 0.41045  16
   1   1  -6 2.80211 0.64221   1
  -1  -1   6 4.14899 0.57970   1
   1   1  -5 1.60511 0.47507  13
   1  -1  -5 2.24468 0.23632  11
   1  -1  -5 3.29045 0.76178   2
   1   1  -5 1.46028 0.50440   9
   1  -1  -5 2.41068 0.42471   5
  -1  -1   5 1.85884 0.52759   9
  -1   1   5 1.92129 1.11294   4
  -1  -1   5 1.89304 1.01561   4
   1  -1  -5 1.77334 0.38146  13
   1   1  -5 2.29769 0.36003  16
  -1  -1   5 3.19912 1.01253  10
   1   1  -5 2.25096 0.58560   8
  -1  -1   5 1.80933 0.39679  16
   1   1  -5 2.17306 0.52095   1
  -1   1   5 2.72164 0.36387   5
  -1   1   5 1.98803 0.21217  12
   1   1  -4 255.582 15.6871   9
   1  -1  -4 244.030 15.7435   2
  -1   1   4 275.810 15.8637  17
   1   1  -4 263.667 15.6088  16
   1  -1  -4 310.451 15.5654  11
   1  -1  -4 251.321 15.6172   5
  -1   1   4 253.166 15.9388   4
   1   1  -4 261.102 15.7329   8
  -1  -1   4 257.814 15.9127   4
   1  -1  -4 247.053 15.6042  13
   1   1  -4 259.158 15.7241   1
   1   1  -4 274.884 15.6703  13
  -1  -1   4 269.888 15.9124  10
   1   1  -3 490.215 29.4725  16
  -1   1   3 408.119 29.6593   4
   1  -1  -3 470.940 29.4709   5
   1   1  -3 503.075 29.5402   3
   1  -1  -3 489.065 29.4669  13
   1   1  -3 492.319 29.5584   9
  -1  -1   3 463.250 29.6658   4
  -1  -1   3 460.987 29.6800  10
   1   1  -3 484.731 29.5114  13
  -1   1   3 494.329 29.6435  17
   1   1  -3 509.234 29.5801   1
   1  -1  -3 487.914 29.5561   2
   1   1  -3 487.786 29.5764   8
   1  -1  -2 19.4294 1.00102  11
  -1  -1   2 15.1503 1.18513   4
   1   1  -2 15.9136 1.14032   8
   1   1  -2 16.3438 1.03794  13
   1   1  -2 13.8298 1.08846   3
  -1   1   2 16.1767 1.10433   6
  -1   1   2 15.6798 1.20231  17
   1   1  -2 13.3212 1.10558   1
   1   1  -2 16.8008 1.13212   9
  -1  -1   2 16.4638 1.24924  10
   1  -1  -2 13.3788 1.03323   2
  -1  -1   2 14.4270 1.00104  16
   1  -1  -1 145.719 9.05728  16
   1   1  -1 155.800 9.15748   8
  -1   1   1 151.464 9.14809   7
   1   1  -1 157.257 9.15927   3
   1   1  -1 144.839 9.15164   9
   1  -1  -1 180.989 9.08164  11
   1   1  -1 166.768 9.15335   1
  -1  -1   1 155.966 9.11558  14
  -1  -1   1 148.442 9.15107   4
   1   1  -1 161.835 9.08504  13
  -1   1   1 135.153 9.19137  17
  -1   1   1 152.543 9.17947   6
   1   1   0 0.40344 0.32756   9
   1  -1   0 0.53435 0.17571  16
   1   1   0 0.58909 0.33569   5
   1   1   0 0.55510 0.30823   8
  -1  -1   0 0.73316 0.25940  14
  -1   1   0-0.05058 0.59167  17
  -1   1   0 0.79249 0.54542   6
   1   1   0 0.52558 0.35576   3
  -1   1   0 0.35527 0.34645   8
  -1   1   0 0.60312 0.41691   7
   1   1   0 0.41915 0.26926   1
   1  -1   1 147.724 8.59118  10
   1  -1   1 151.899 8.55452  16
   1   1   1 136.212 8.61205   3
   1   1   1 154.868 8.68629   2
  -1  -1  -1 148.975 8.53614  15
  -1   1  -1 148.657 8.61824  15
  -1   1  -1 131.100 8.71442   7
  -1   1  -1 141.210 8.77952   6
   1   1   1 150.334 8.62737   5
  -1  -1  -1 143.948 8.61847  14
  -1   1  -1 144.369 8.65958   8
  -1   1  -2 37.6410 2.52927   8
   1  -1   2 39.2618 2.39231  16
   1   1   2 38.6905 2.62353  10
   1  -1   2 37.3712 2.52458  10
  -1  -1  -2 41.1641 2.41425  15
  -1   1  -2 35.7088 2.62986   7
   1  -1   2 43.7706 2.52828   2
   1   1   2 41.9234 2.59011   2
  -1   1  -2 40.6098 2.47402  15
  -1  -1  -2 37.7109 2.44502   3
  -1  -1  -2 38.1878 2.39726   9
  -1  -1  -3 279.850 16.1818   5
   1  -1   3 265.877 16.2434   2
  -1  -1  -3 272.894 16.0660   9
  -1  -1  -3 284.210 16.1434   3
  -1   1  -3 285.934 16.1490   9
   1   1   3 273.488 16.3517  10
  -1   1  -3 257.432 16.1325  13
   1  -1   3 279.371 16.3094  10
  -1   1  -3 285.099 16.3717   7
  -1   1  -3 273.417 16.1980  15
   1  -1   3 268.767 16.3585   4
  -1   1  -3 264.652 16.2060   8
  -1  -1  -3 286.398 16.0247  13
  -1  -1  -3 272.710 16.1488  15
   1   1   3 273.195 16.2911   2
  -1  -1  -4 291.319 17.5595   5
   1   1   4 285.727 17.4171  13
  -1   1  -4 314.030 17.4816  16
  -1   1  -4 315.188 17.7914   7
  -1   1  -4 314.055 17.6155  15
   1  -1   4 275.453 17.8205   4
   1   1   4 292.051 17.7913  10
   1  -1   4 294.869 17.6684   2
  -1   1  -4 298.577 17.5245   9
  -1  -1  -4 301.113 17.5065   3
   1   1   4 296.121 17.4798   3
  -1  -1  -4 314.495 17.5714  15
  -1  -1  -4 306.038 17.4116  13
   1   1   4 278.771 17.8810   4
   1  -1   4 301.868 17.7570  10
  -1   1  -4 284.361 17.5805   8
  -1   1  -4 319.073 17.5295  13
  -1  -1  -5 10.9342 0.92099   3
  -1   1  -5 11.6860 0.97051   1
  -1   1  -5 11.1917 0.97540   9
   1   1   5 12.3316 1.02455   5
   1   1   5 11.7978 1.45267  10
   1  -1   5 11.1608 1.07862   8
   1   1   5 10.5169 1.59179   4
   1   1   5 12.7569 0.85653  13
   1  -1   5 11.1340 1.23297   2
  -1  -1  -5 10.4803 0.99221   5
  -1   1  -5 12.9595 0.91242  16
   1  -1   5 13.6153 1.48631   4
  -1  -1  -5 11.7027 1.04492  15
   1  -1   5 12.9462 1.43434  10
  -1   1  -5 12.6871 0.98082  13
  -1   1  -5 13.6987 1.10810   8
  -1   1  -5 11.4271 1.08476  15
  -1  -1  -5 11.1339 0.82902  13
  -1   1  -6 71.5614 4.32951  13
  -1   1  -6 68.2817 4.46323  15
  -1   1  -6 72.1862 4.38186   8
  -1  -1  -6 71.9745 4.43487  15
   1   1   6 70.2722 4.93455   4
  -1  -1  -6 65.5198 4.37465   5
  -1   1  -6 69.4765 4.27039  16
  -1  -1  -6 67.1687 4.64170   2
  -1   1  -6 68.9288 4.32706   9
   1   1   6 74.4059 4.80621  10
   1  -1   6 62.3825 4.42667   8
  -1  -1  -6 73.3925 4.14982   1
  -1  -1  -6 70.9062 4.28853   3
   1  -1   6 73.3475 4.85620   4
   1  -1   6 66.0728 4.26104  16
   1   1   6 68.4356 4.23533  13
   1   1   6 74.4756 4.35558   5
  -1   1  -6 74.0284 4.33454   1
   1  -1   6 70.6854 4.76515  10
  -1  -1  -6 71.3025 4.22306  13
   1  -1   6 77.0782 4.61200   2
   1  -1   6 62.9573 4.66461   7
  -1  -1  -7 137.417 7.72411  15
  -1  -1  -7 119.869 7.39156   1
  -1  -1  -7 124.845 7.64055   5
  -1   1  -7 130.337 7.60593   8
  -1   1  -7 135.755 7.58571  13
   1  -1   7 127.011 7.97857   7
  -1  -1  -7 121.895 7.92185   2
   1   1   7 124.482 7.49358  13
  -1   1  -7 126.725 7.60382   1
   1  -1   7 136.079 7.88477   2
   1  -1   7 128.327 8.05188  10
   1  -1   7 125.234 7.50524  16
   1   1   7 117.821 7.38854   8
   1   1   7 134.331 8.28158   4
   1   1   7 128.288 7.48148  16
   1   1   7 136.725 8.13222  10
   1  -1   7 142.420 8.21632   4
  -1   1  -7 132.604 7.52342  16
  -1   1  -7 148.099 7.78889  15
  -1  -1  -7 135.095 7.47558  13
  -1  -1  -7 125.385 7.51622   3
   1  -1   7 107.859 7.56787  13
   1  -1   7 117.917 7.65755   8
  -1   1  -7 117.996 7.54741   9
   1   1   7 134.586 7.59324   5
   1   1   8 5.33674 1.40292  10
  -1  -1  -8 5.02299 0.84548   5
  -1   1  -8 5.39715 0.80227  13
   1  -1   8 5.60601 1.29567   7
  -1  -1  -8 6.62454 0.97304  15
  -1  -1  -8 5.78195 0.53277   1
  -1   1  -8 5.49654 0.94344  15
  -1   1  -8 6.08646 0.80864   1
   1   1   8 5.32126 0.54261   8
  -1  -1  -8 4.34045 0.68442   3
  -1   1  -8 6.86428 0.81521   8
  -1  -1  -8 4.59599 0.63241  13
   1   1   8 5.57344 0.65217  16
  -1   1  -8 5.22984 0.67878  16
   1   1   8 6.06615 1.67718   4
   1  -1   8 7.54231 1.51297  10
   1   1   8 6.10327 0.79881   5
  -1   1  -8 5.86367 0.75131   9
   1  -1   8 6.45150 1.23385   2
   1  -1   8 6.38615 0.93634   8
  -1   1  -8 6.05182 0.87292   5
   1  -1   8 4.12341 0.66599  16
   1  -1   8 4.82346 0.83861  13
   1   1   8 6.87939 0.69175  13
   1  -1   8 7.26040 1.68642   4
  -1   1  -9 293.782 16.4012  13
   1   1   9 297.667 17.2630   4
   1  -1   9 309.544 17.2247   4
  -1   1  -9 297.214 16.3940   8
   1  -1   9 246.881 16.4152  13
  -1  -1  -9 276.144 16.3099   3
  -1   1  -9 279.085 16.4201   1
   1   1   9 260.856 16.1953   8
  -1  -1  -9 290.879 16.5787  15
  -1  -1  -9 263.354 16.4606   5
  -1  -1  -9 289.602 16.1997   1
   1   1   9 310.173 17.1148  10
   1  -1   9 255.071 16.4635   8
   1  -1   9 271.423 16.8584   7
   1  -1   9 247.127 16.6540   2
  -1   1  -9 280.195 16.3191  16
   1   1   9 289.107 16.3279  13
  -1   1  -9 289.915 16.6085  15
   1   1   9 276.856 16.2647  16
   1  -1   9 266.145 16.9564  10
  -1   1  -9 256.208 16.3132   9
  -1  -1  -9 297.044 16.2838  13
   1  -1   9 282.376 16.3053  16
   1  -1  10 53.5681 4.10887   7
  -1   1 -10 67.6863 3.32283  11
   1  -1  10 46.7646 4.29343   4
  -1  -1 -10 55.6297 3.76459  15
   1   1  10 52.3946 3.40883  16
   1   1  10 60.2993 4.35289  10
   1  -1  10 54.7294 3.67098   8
  -1   1 -10 55.2843 3.76620  15
  -1  -1 -10 55.1789 3.46316   3
  -1  -1 -10 56.1556 3.33553   1
   1  -1  10 49.0789 4.19093  10
   1   1  10 51.8495 3.98605   2
  -1   1 -10 51.5485 3.54648  13
   1   1  10 55.3794 4.54442   4
   1   1  10 57.4384 3.50275  13
  -1  -1 -10 48.3127 3.62914   5
  -1   1 -10 49.4364 3.42588   9
   1   1  10 46.8731 3.32879   8
  -1   1 -10 50.4789 3.57584   1
   1  -1  10 56.5181 3.46854  16
  -1  -1 -10 55.2519 3.43940  13
   1   1  11 94.2955 7.26096   4
   1  -1  11 93.0480 7.16223   4
  -1  -1 -11 99.8830 6.05878   1
  -1   1 -11 95.6580 6.12469   9
  -1  -1 -11 103.253 6.18227  13
   1   1  11 99.1262 6.62961   7
   1   1  11 109.387 7.17063  10
   1  -1  11 98.0581 6.18652  16
  -1   1 -11 106.813 6.95444   2
  -1   1 -11 98.8471 6.28663  13
  -1  -1 -11 94.3103 6.17686   3
  -1   1 -11 97.8766 6.34093   1
   1  -1  11 96.3546 6.62480  15
   1  -1  11 99.2135 7.04311  10
   1  -1  11 103.357 6.91321   7
  -1  -1 -11 101.942 7.02843  10
  -1  -1 -11 94.3250 6.86140   2
   1   1  11 102.291 6.78590   2
   1   1  11 99.1678 6.14629  16
  -1   1 -11 94.2951 6.51506  15
   1   1  11 92.2341 6.06624   8
   1   1  11 99.8363 6.24290  13
  -1  -1 -11 105.812 6.54759  15
   1  -1  11 93.1259 6.37504   8
   1  -1  12 46.4581 3.17434  16
  -1   1 -12 53.7966 3.63533  15
   1   1  12 46.2816 3.02776   8
   1   1  12 53.4941 3.87907   2
   1   1  12 43.3480 3.22254  13
  -1  -1 -12 51.1531 3.56573  15
   1  -1  12 46.4921 4.32578   4
   1   1  12 43.9858 3.10699  16
   1  -1  12 43.3320 3.60208  15
  -1   1 -12 49.1989 3.33348   1
  -1   1 -12 47.5594 3.03343   9
   1   1  12 51.0371 4.50330   4
  -1   1 -12 57.6638 2.95019  11
  -1  -1 -12 44.6630 2.99874   1
   1  -1  12 52.5127 4.01044   7
   1   1  12 53.8910 3.75666   7
  -1   1 -12 47.0222 3.98009   2
  -1  -1 -12 46.6165 3.16265   3
   1  -1  12 45.5913 3.39675   8
  -1   1 -12 49.7239 3.31297  13
   1   1  12 48.2351 4.19394  10
  -1  -1 -12 50.7796 3.19055  13
  -1  -1 -12 44.7717 3.90847   2
   1  -1  12 42.1421 4.10456  10
  -1  -1 -12 49.8702 4.14064  10
   1   1  13 104.058 6.50498   8
   1   1  13 113.358 7.39014   2
   1   1  13 111.047 7.25059   7
   1  -1  13 105.237 7.20910  15
  -1  -1 -13 110.180 6.49353   1
   1   1  13 109.380 7.96954   4
  -1   1 -13 110.027 6.46077   9
   1  -1  13 109.401 6.89345   8
  -1  -1 -13 100.822 7.67786  10
   1  -1  13 121.258 8.09310   4
  -1   1 -13 120.261 6.82969  13
  -1  -1 -13 112.957 6.66656  13
   1  -1  13 100.389 7.45927   7
  -1   1 -13 119.629 7.16105  15
  -1   1 -13 112.806 6.86552   1
   1   1  13 103.241 7.72045  10
  -1   1 -13 94.0837 7.45255   2
   1  -1  13 114.180 6.68726  16
   1   1  13 89.3073 6.70002  13
   1  -1  13 116.438 7.84557  10
  -1  -1 -13 110.714 7.57096   2
  -1   1 -13 111.651 6.39194  11
  -1  -1 -13 107.176 6.65648   3
   1   1  13 110.391 6.63292  16
  -1  -1 -13 108.444 7.08683  15
  -1   1 -13 102.579 6.90406   5
  -1  -1 -14 10.7976 2.29081  10
  -1  -1 -14 11.2601 1.16331  13
  -1  -1 -14 10.9972 1.11426   3
  -1  -1 -14 11.0617 0.87085   1
   1   1  14 11.1544 0.89130   8
   1  -1  14 12.8586 2.10799   2
  -1   1 -14 11.5185 1.31660  13
  -1   1 -14 8.94347 2.03334   2
   1   1  14 10.3854 1.85482   7
  -1  -1 -14 13.8644 2.22363   2
   1   1  14 12.7682 2.62838  10
  -1   1 -14 11.3345 1.42328   1
   1  -1  14 14.5757 2.55424  10
   1  -1  14 11.1654 1.44422   8
  -1   1 -14 14.1845 1.73848  15
   1  -1  14 12.0871 2.82282   4
   1   1  14 10.1045 1.34469  13
  -1  -1 -14 13.7523 1.75409  15
   1   1  14 9.19096 2.58933   4
  -1   1 -14 9.38723 0.69439  12
   1   1  14 9.34589 1.11159  16
  -1   1 -14 8.87095 1.14354   3
   1  -1  14 10.8804 1.18792  16
   1  -1  14 11.0088 2.10957   7
   1  -1  14 13.8786 1.80697  15
   1   1  14 12.7259 2.13080   2
  -1   1 -14 14.5387 1.65831   5
   1  -1  15 63.5841 4.48762   8
   1   1  15 65.5826 4.99720   7
  -1  -1 -15 60.9067 3.99565   1
   1  -1  15 76.4584 5.77551  10
   1  -1  15 59.8515 5.67437   4
  -1   1 -15 74.0029 4.50554  13
  -1  -1 -15 79.5239 4.95525  15
   1   1  15 69.5443 5.20393   2
   1   1  15 60.3417 5.56626  10
   1   1  15 59.8057 4.44654  13
  -1   1 -15 74.2253 4.73195   5
   1  -1  15 77.1107 4.38461  16
   1   1  15 70.8624 4.28514  16
   1  -1  15 60.7254 5.21088   7
  -1  -1 -15 71.2434 4.71393   5
  -1  -1 -15 65.6377 5.36479   2
  -1   1 -15 68.8823 4.36088   3
  -1   1 -15 71.8619 5.45970   2
   1   1  15 71.3461 5.99053   4
   1  -1  15 65.7778 5.18906   2
  -1  -1 -15 69.9952 4.27674   3
  -1  -1 -15 49.2404 5.33758  10
  -1   1 -15 69.4467 4.85591  15
   1  -1  15 62.8691 4.91901  15
  -1   1 -15 76.4757 4.57388   1
  -1  -1 -15 69.7630 4.33303  13
   1  -1  16 1.82729 1.43028  15
  -1   1 -16 0.91851 1.29201   5
   1  -1  16 2.24819 0.99426  16
   1   1  16 2.03041 1.53091  14
  -1  -1 -16 1.85115 0.90332  13
   1   1  16-0.11702 1.16684  13
  -1  -1 -16 1.45606 0.76499   3
   1   1  16 1.67525 1.84205   2
   1  -1  16 1.14684 1.96410   7
  -1  -1 -16 0.30543 1.91018   2
  -1   1 -16 5.07216 2.05177   2
  -1   1 -16 0.69290 1.06799   1
  -1  -1 -16 1.96549 1.25094   5
   1   1  16 4.03215 0.92450  16
  -1   1 -16 3.55867 0.89083   3
   1   1  16 1.34475 1.79698   7
  -1  -1 -16 4.66573 2.29111  10
   1  -1  16 1.23986 1.08913   8
  -1   1 -16 0.73992 1.01900  13
  -1   1 -17 41.1892 3.18761   1
   1   1  17 51.7839 4.07888  14
  -1   1 -17 46.1571 3.20669  13
   1  -1  17 43.9408 3.16516   8
  -1  -1 -17 45.5779 3.48756   5
  -1  -1 -17 40.9416 4.23351   2
  -1  -1 -17 40.3568 3.04326  13
   1   1  17 35.1344 3.72772   7
   1  -1  17 44.2017 4.24408   7
  -1   1 -17 44.0003 2.98793   3
   1   1  17 42.3820 2.96977  16
   1  -1  17 40.7224 3.72992  15
  -1   1 -17 48.0324 4.46975   2
  -1   1 -17 43.3278 3.49671   5
  -1  -1 -17 42.7182 4.38694  10
   1  -1  17 44.1840 3.04408  16
   1  -1  18 1.32797 1.59340  15
  -1  -1 -18 3.08492 1.46669   5
  -1   1 -18 3.64937 2.31633   2
  -1   1 -18 3.36323 1.35545  13
   1   1  18 2.39146 0.94604  16
  -1   1 -18 2.80125 1.55938   5
   1   1  18 2.63213 1.94628  14
  -1  -1 -18 3.16066 2.29024   2
   1   1  18 4.11929 2.01212   7
   1  -1  18 3.60043 1.06542  16
   1  -1  18 2.90362 2.44866   7
  -1  -1 -18 0.82336 2.34513  10
   1  -1  18 0.28686 1.78517  14
   1  -1  19 46.9430 4.39368  15
   1   1  19 61.1976 4.77559  14
   1  -1  19 45.3322 4.45699  14
  -1   1 -19 59.5644 5.31784   2
  -1  -1 -19 57.7489 4.12894   5
  -1  -1 -19 48.6074 4.94071   2
  -1   1 -19 43.4292 3.94326   5
   1  -1  19 50.2191 4.81779   7
  -1  -1 -19 48.8633 5.32783  10
  -1  -1 -20 11.4944 3.16500   2
  -1   1 -20 12.4200 3.20137   2
   1   1  20 3.33085 2.15413  14
   1  -1  20 7.19916 2.28011  14
  -1   1 -20 2.17042 1.72958   5
  -1  -1 -20 13.1116 3.38941  10
   1   1  20 4.60894 2.13684   7
   1  -1  20 8.52606 2.85357   7
   1  -1  20 6.97035 2.04219  15
   1  -1  21 42.6846 4.64544   7
   1   1  21 36.0098 4.04593  15
  -1  -1 -21 51.7020 5.33154  10
   1   1  21 36.5167 4.13243   7
  -1  -1 -21 37.3180 4.76371   2
   1   1  21 46.6275 4.48295  14
   1  -1  21 45.0621 4.23180  15
  -1   1 -21 47.5169 5.22548   2
   1  -1  21 41.3810 4.33371  14
   1  -1  22 1.03688 2.23498  15
  -1  -1 -22-0.44142 2.81561   2
   1   1  22-0.99277 2.29142  15
   1  -1  22 3.83195 2.68370   7
  -1   1 -22-0.46515 2.94653   2
   1  -1  22 2.21106 2.55145  14
   1   1  22 3.36520 2.30222  14
  -1   1 -23 23.5161 4.33596   2
   1   1  23 18.9926 3.32670  15
   1  -1  23 14.5331 4.43359   6
  -1  -1 -23 18.9664 3.90477   2
   1  -1  23 26.0859 3.63886  14
  -1  -2  24 1.39395 3.21606   7
   1  -2 -24-0.44231 3.21767   2
  -1   2  23 12.6102 2.89107  15
   1  -2 -23 17.5120 3.96606  10
  -1  -2  23 13.5129 3.52484   7
   1   2 -23 17.9560 4.08264  10
   1   2 -23 10.9485 3.39500   2
  -1   2  23 13.2572 3.03682  14
  -1  -2  23 15.8087 2.86998  15
  -1   2  22 0.71652 2.28452  14
  -1  -2  22-0.96912 2.00271  15
   1  -2 -22 3.01075 3.11088  10
  -1   2  22 1.53287 2.21839   7
   1   2 -22-0.51613 3.42376  10
   1  -2 -22-0.40089 2.99199   2
  -1  -2  22 0.86806 2.91541   7
   1   2 -22-2.25176 2.87177   2
  -1   2  21 1.16373 2.12835   7
   1   2 -21-3.90378 3.39750  10
  -1  -2  21 0.41657 2.86705   7
   1   2 -21-0.42548 2.89370   2
  -1   2  21 2.29967 1.88360  15
   1  -2 -21 0.38049 2.58788   2
   1  -2 -21-0.94662 2.80449  10
  -1   2  21 5.39918 2.33637  14
  -1  -2  20 4.28240 1.95287  15
   1   2 -20-0.79936 2.58334   2
  -1   2  20-1.35024 1.86908  15
   1   2 -20-0.86996 1.53101   5
   1  -2 -20-2.22725 2.63880  10
   1  -2 -20-1.07829 2.26038   2
  -1   2  20 0.55461 1.93042   7
  -1  -2  20-0.39753 2.84577   7
  -1  -2  19 0.37798 2.54145   7
   1  -2 -19 3.35978 2.44666   2
   1   2 -19 0.37508 2.55288   2
   1   2 -19 3.60020 1.51498   5
  -1   2  19 1.73105 1.30829  13
  -1  -2  19 5.85755 1.96039  15
  -1   2  19 2.27682 1.70305  15
  -1  -2  19 3.05832 1.54094   8
   1  -2 -19 0.41829 2.25407  10
  -1  -2  19 0.53516 0.99387  16
   1   2 -18 7.03071 1.50854   5
   1  -2 -18 5.03840 2.49413   2
   1  -2 -18 5.84927 2.41853  10
  -1   2  18 8.49966 1.83874  15
  -1   2  18 3.98167 2.05647   7
  -1  -2  18 7.19104 1.80017  15
  -1  -2  18 2.52589 1.57000   8
  -1  -2  18 5.01007 2.66090   7
  -1  -2  18 5.51492 1.08890  16
   1  -2 -18 6.91107 1.51878   5
   1   2 -18 4.05188 1.51036   1
   1   2 -18 3.13706 2.37465   2
  -1   2  18 4.32618 1.29656  13
  -1   2  18 7.28614 0.93818  16
  -1   2  18 4.08532 0.60013   8
   1  -2 -18 6.01844 1.20381  13
   1   2 -17 23.0506 1.34581  11
  -1  -2  17 11.9865 2.16793  15
  -1   2  17 17.2042 1.39931  16
  -1  -2  17 17.5056 2.19312   8
  -1   2  17 13.2519 1.35059   8
  -1  -2  17 20.2457 3.17856   7
   1  -2 -17 15.9528 1.61734  13
  -1   2  17 19.7268 2.71312   2
   1   2 -17 17.8640 1.90628  13
   1   2 -17 16.5512 1.93265   5
   1  -2 -17 14.9984 2.56105   2
   1   2 -17 17.0826 1.99748   1
  -1   2  17 17.4930 1.81011  13
  -1  -2  17 16.8274 1.58772  16
   1  -2 -17 17.8646 3.05567  10
  -1   2  17 13.7730 2.22203  15
   1   2 -17 12.6250 2.68635   2
  -1   2  16 17.6524 1.45435   8
  -1   2  16 17.0916 1.39120  16
   1  -2 -16 15.5254 2.61794   2
   1   2 -16 19.2084 2.02874   1
   1   2 -16 15.3098 1.83724  13
  -1   2  16 17.9789 2.95450  17
   1   2 -16 18.4534 1.28717  12
  -1  -2  16 18.4544 3.16192   4
   1   2 -16 17.9414 1.71596   3
  -1   2  16 18.2746 1.73155  13
  -1   2  16 16.2134 3.03730  10
   1  -2 -16 16.6343 2.70514  10
  -1  -2  16 17.3262 2.22526  15
  -1  -2  16 16.7886 2.11781   8
   1   2 -16 18.5332 1.35385   9
   1   2 -16 19.9659 1.93140   5
  -1  -2  16 18.0416 2.93535   7
   1  -2 -16 16.4642 1.57568  13
   1   2 -16 20.0968 2.72795   2
  -1   2  16 17.5718 2.25202  15
  -1  -2  16 14.7203 1.54160  16
  -1   2  16 19.0828 2.52395   2
  -1  -2  16 14.6567 2.78624  10
  -1  -2  15 17.4584 2.06158  15
  -1  -2  15 16.7873 2.82527   4
  -1   2  15 12.4755 1.28029   8
   1   2 -15 16.7048 2.52578   2
  -1   2  15 13.9859 1.52218  13
   1   2 -15 17.7459 1.75407   5
  -1   2  15 15.7088 2.81087  10
  -1   2  15 15.0051 2.52501  17
  -1  -2  15 15.1110 2.71353  10
  -1   2  15 15.1455 1.21986  16
   1   2 -15 15.6545 1.73915  13
   1  -2 -15 13.7608 1.33515  13
   1   2 -15 15.6047 1.52566   3
  -1  -2  15 13.0073 2.47018   7
  -1  -2  15 10.3397 1.81415   8
  -1   2  15 12.3152 2.18229   2
   1   2 -15 14.4128 1.24371   9
   1   2 -15 14.5653 1.78810   1
  -1   2  15 10.5928 1.89823  15
   1  -2 -15 17.9308 2.83365  10
  -1  -2  15 16.6683 1.43907  16
   1  -2 -15 12.1018 2.20828   2
   1  -2 -14 2.77872 1.55429   2
  -1  -2  14 3.31420 1.18213  13
   1  -2 -14 4.55067 0.87822  13
  -1   2  14 4.37203 2.02703  17
  -1  -2  14 4.95598 1.97456   7
  -1  -2  14 5.43630 0.93562  16
   1  -2 -14 2.60725 1.82443  10
  -1  -2  14 1.45519 1.23575   8
   1   2 -14 3.18824 0.75213   9
  -1   2  14 5.79447 0.79156   8
  -1   2  14 4.14534 1.70413   2
  -1  -2  14 3.82971 1.20237  15
   1   2 -14 2.72267 1.22536   1
  -1  -2  14 4.02898 2.23125   4
  -1   2  14 4.63491 0.69436  16
  -1   2  14 0.87225 2.13933  10
   1   2 -14 2.77981 0.93750   3
  -1   2  14 4.55870 1.02236  13
   1   2 -14 5.81697 1.14670  13
   1   2 -14 6.79302 1.74736   2
  -1  -2  14 1.95697 1.81050  10
   1  -2 -13 13.8380 2.15485  10
  -1   2  13 11.7786 2.46746  10
   1  -2 -13 13.3310 2.00294   2
  -1  -2  13 9.48020 2.05914   7
  -1  -2  13 8.34424 1.67761   8
   1   2 -13 12.4577 1.40327  13
   1   2 -13 14.3401 2.09083   2
  -1  -2  13 13.6804 2.45955   4
  -1   2  13 12.0231 1.16307   8
  -1  -2  13 15.5466 1.75478  15
   1   2 -13 17.1842 1.30123   9
   1   2 -13 15.1166 1.44258   3
  -1  -2  13 11.5857 2.32008  10
  -1  -2  13 13.0465 1.26184  16
  -1   2  13 11.9882 1.98722   2
  -1   2  13 13.5082 1.35270  13
   1   2 -13 16.1462 1.69927   1
  -1   2  13 15.9562 1.11521  16
   1  -2 -13 15.7138 1.48234   5
   1  -2 -13 11.4317 1.24035  13
  -1  -2  13 12.8931 1.56011  13
  -1   2  12 56.7455 3.71354   8
  -1  -2  12 62.3227 4.26733   8
   1  -2 -12 57.4148 4.61703  10
   1  -2 -12 58.5476 4.49186   2
   1  -2 -12 54.6084 3.90408   5
   1   2 -12 49.8394 4.76770   4
  -1  -2  12 59.1056 4.67170  10
  -1  -2  12 56.9997 4.19747  15
  -1   2  12 60.9152 3.83417  13
  -1   2  12 60.2415 4.33110   2
   1   2 -12 60.9524 3.82274   9
   1   2 -12 61.7206 4.15164   1
  -1  -2  12 53.6862 4.62803   7
  -1   2  12 61.7678 3.65466  16
  -1  -2  12 52.6534 3.98280  13
  -1  -2  12 58.6841 4.82317   4
   1  -2 -12 61.2004 3.78546  13
   1   2 -12 64.0089 3.98078  13
   1   2 -12 61.3882 4.56969   2
  -1  -2  12 60.2493 3.78379  16
   1   2 -11 107.497 6.56386  13
  -1  -2  11 102.158 6.77846   8
  -1  -2  11 107.911 7.25973  10
   1  -2 -11 102.785 6.37016  13
  -1  -2  11 112.239 7.38678   4
   1  -2 -11 87.2920 7.04160  10
   1   2 -11 113.018 6.72887   1
  -1  -2  11 99.6916 6.78003  15
   1   2 -11 110.077 7.47891   4
  -1  -2  11 101.668 7.17082   7
   1  -2 -11 95.7380 6.49628   5
   1   2 -11 107.549 7.07962   2
  -1   2  11 106.947 6.44250  13
   1  -2 -11 108.156 6.21111   3
  -1   2  11 109.935 6.28090  16
  -1  -2  11 102.699 6.39080  16
   1   2 -11 110.258 6.48390   9
  -1   2  11 112.158 6.89957   2
  -1  -2  11 92.2842 6.58357  13
  -1   2  10 35.7766 2.31191  16
   1  -2 -10 36.2078 2.28141   3
  -1  -2  10 37.0041 3.22266  10
  -1   2  10 40.8810 2.98040   2
   1   2 -10 40.0669 2.77171   1
  -1  -2  10 30.6399 2.74106   8
   1   2 -10 38.1571 2.56888   9
   1   2 -10 36.6410 2.43498  16
  -1   2  10 34.4651 2.43978  13
  -1  -2  10 39.4797 3.19737   7
   1   2 -10 37.7853 3.38025   4
  -1   2  10 37.1967 2.44103   5
  -1  -2  10 38.2583 2.45647  16
   1  -2 -10 34.2905 2.40603  13
  -1  -2  10 40.2892 2.56169   9
  -1  -2  10 36.4463 3.32734   4
   1  -2 -10 37.0205 2.56565   5
   1   2 -10 38.2341 2.61358  13
  -1   2   9-0.49069 0.97386   2
   1   2  -9 0.97785 0.64836   9
  -1  -2   9 1.93923 1.41140  10
   1   2  -9 1.86624 1.34961   4
   1   2  -9 0.89674 0.80167   1
   1   2  -9 0.46246 0.82908   8
  -1  -2   9 0.23917 0.90207   8
   1   2  -9 0.92273 0.50876  16
  -1  -2   9 1.78676 0.67913   9
   1  -2  -9 0.56957 0.62291   5
   1  -2  -9 0.46182 0.36280   3
  -1   2   9 0.42889 0.47639  13
  -1   2   9 0.50533 0.17314  12
   1   2  -9 0.59764 0.67918  13
  -1   2   9 0.71731 0.55655   5
  -1  -2   9 0.95035 1.32360   4
   1  -2  -9 0.41352 0.48012  13
  -1  -2   9 0.91172 0.52633  16
   1   2  -8 97.6521 6.09011   9
  -1   2   8 93.6579 5.79377   9
   1   2  -8 82.7973 6.51628   4
  -1   2   8 99.2492 5.93605  13
   1   2  -8 109.673 6.20315   8
  -1  -2   8 96.2839 6.51439  10
   1  -2  -8 103.846 5.87112   3
   1   2  -8 109.857 6.08950  13
  -1  -2   8 103.056 5.94900  16
  -1  -2   8 90.3074 6.53448   4
  -1   2   8 96.0348 5.94307   5
   1   2  -8 99.5036 6.18822   1
   1  -2  -8 104.465 5.91695  13
  -1  -2   8 96.0052 6.08708   9
  -1  -2   8 92.0076 6.25966   8
  -1   2   8 95.8906 5.75858  12
  -1   2   8 97.8681 5.82528   3
   1  -2  -8 95.3790 6.02925   5
  -1  -2   8 108.823 6.06486   1
   1   2  -8 105.099 5.95718  16
   1  -2  -8 88.7506 6.28160   2
  -1   2   8 99.2190 6.28947   2
   1  -2  -7 12.4772 1.58810  10
  -1  -2   7 14.8131 1.80452   4
  -1  -2   7 15.1193 1.36186   9
  -1   2   7 15.0426 1.05408   3
  -1  -2   7 12.6337 1.43796   8
   1  -2  -7 13.8067 1.47205   2
  -1   2   7 14.2269 1.16511   5
   1  -2  -7 14.7402 1.11720  13
  -1   2   7 15.9024 1.12812  13
  -1  -2   7 13.9169 1.15507  16
   1   2  -7 16.7477 1.29095  13
   1   2  -7 17.4134 1.39852   9
   1   2  -7 17.3163 1.43548   8
   1   2  -7 15.7276 1.16024  16
  -1   2   7 15.9341 1.52096   2
   1  -2  -7 12.8182 1.76259   4
  -1   2   7 16.1239 1.07640   9
   1  -2  -7 15.0638 1.10436   3
  -1  -2   7 17.7915 1.33512   1
   1  -2  -7 16.2769 1.25370   5
  -1  -2   7 15.6156 1.77144  10
  -1  -2   7 13.8917 1.34021  15
   1   2  -7 15.4714 1.41035   1
  -1  -2   6 14.2774 1.65014  10
  -1  -2   6 9.36798 1.17576   9
   1  -2  -6 12.0140 0.91271  13
  -1   2   6 12.1205 0.99886   5
   1   2  -6 13.1008 0.98629  16
   1  -2  -6 11.7280 0.93425   3
   1  -2  -6 12.5012 1.25640   2
  -1  -2   6 11.3095 1.11483  15
   1  -2  -6 11.4875 1.05522   5
   1   2  -6 12.5236 1.22306   8
   1   2  -6 11.2774 1.21207   1
  -1   2   6 11.6625 1.31006   2
  -1   2   6 10.7197 0.93286   3
  -1  -2   6 10.4888 1.57648   4
   1  -2  -6 13.9044 1.41228  10
  -1  -2   6 11.0020 0.97763  16
   1  -2  -6 12.9076 1.52682   4
   1   2  -6 11.2430 1.14947   9
   1   2  -6 15.3243 1.08826  13
  -1   2   6 12.8065 0.92768  13
  -1   2   6 11.3670 0.91745   9
  -1   2   5 63.2795 3.59030  11
  -1   2   5 60.6755 3.68370   9
   1   2  -5 59.8274 3.69099  16
  -1   2   5 58.2129 3.71252   5
   1   2  -5 64.2789 3.76676  13
   1  -2  -5 55.3423 3.72149   5
   1  -2  -5 62.5404 4.01842  10
   1   2  -5 57.3106 3.87213   9
   1  -2  -5 59.9231 3.88394   2
   1  -2  -5 60.0480 3.63424  13
  -1   2   5 59.2191 3.63824  13
  -1  -2   5 59.3015 4.05134   4
  -1  -2   5 62.9063 4.08961  10
   1   2  -5 61.0162 3.90819   8
   1   2  -5 60.6377 3.87079   1
  -1   2   5 60.4159 3.69855   3
   1  -2  -5 57.8275 4.11691   4
  -1   2   5 60.5695 3.89386   2
  -1  -2   5 60.8789 3.81203  15
   1   2  -4 160.807 9.78007  13
  -1   2   4 171.794 9.76030   3
   1  -2  -4 167.355 9.75776   5
   1   2  -4 149.787 9.88694   1
   1  -2  -4 136.892 9.91339  10
   1  -2  -4 156.745 9.85958   2
   1  -2  -4 156.661 10.0198   4
  -1  -2   4 161.399 10.0269  10
  -1  -2   4 161.060 9.97204   4
   1   2  -4 164.648 9.73294  16
  -1   2   4 158.995 9.74313   9
   1   2  -4 164.719 9.85975   3
   1   2  -4 163.033 9.90150   9
   1   2  -4 152.866 9.91025   8
  -1   2   4 157.433 9.76153   5
  -1  -2   4 145.846 9.76979  15
   1  -2  -3 127.373 8.19905  10
   1   2  -3 142.007 8.13897  13
   1   2  -3 153.342 8.45365   7
  -1  -2   3 136.610 8.23442   4
   1   2  -3 126.341 8.21311   1
   1   2  -3 135.538 8.27572   8
   1  -2  -3 140.150 8.18818   2
   1   2  -3 142.313 8.27915   9
  -1  -2   3 131.154 8.10331  15
   1  -2  -3 143.797 8.24700  17
   1   2  -3 138.114 8.22264   3
   1  -2  -3 141.906 8.30979   4
  -1  -2   3 138.003 8.35351  10
   1   2  -2 222.047 12.9882   7
   1  -2  -2 237.824 12.8369   7
   1   2  -2 222.419 12.8474   1
   1   2  -2 189.436 12.7387  13
   1   2  -2 203.913 12.8823   9
   1   2  -2 212.954 12.8929   8
   1  -2  -2 213.889 12.8484   8
   1  -2  -2 233.980 12.8486   6
   1   2  -2 208.661 12.8566   3
   1  -2  -2 218.888 12.8445  17
  -1  -2   2 228.308 12.8096   4
  -1  -2   2 227.655 12.7080  15
   1  -2  -2 205.329 12.8222   4
  -1  -2   2 225.514 12.7306  16
  -1   2   1 13.2369 1.18169   9
   1   2  -1 13.9675 1.30546   8
   1  -2  -1 14.6199 1.01817  16
  -1  -2   1 17.5249 1.34343   6
  -1  -2   1 15.6780 1.06204  14
  -1   2   1 12.0980 1.24952   8
   1  -2  -1 15.1374 1.22534  17
   1   2  -1 18.2145 1.21479   1
   1   2  -1 14.2333 1.26576   9
   1   2  -1 16.4775 1.27871   3
  -1  -2   0 482.148 25.6261  14
  -1   2   0 417.444 25.7672   8
  -1   2   0 441.559 25.8296   7
   1   2   0 434.213 25.7256   3
  -1  -2   0 448.513 25.7683   7
   1   2   0 444.867 25.7000   5
   1   2   0 431.464 25.7309   9
   1  -2   0 443.814 25.7854  17
  -1  -2   0 427.064 25.6766   6
  -1   2   0 460.784 25.7120   9
   1  -2   0 418.072 25.5847  16
   1  -2   1 531.143 30.6146  15
  -1  -2  -1 556.628 30.5450   6
  -1  -2  -1 543.983 30.6416   7
  -1   2  -1 510.483 30.8557   6
   1  -2   1 508.387 30.5457  16
  -1  -2  -1 572.783 30.6128  14
  -1   2  -1 542.013 30.8489   7
   1  -2   1 516.206 30.5663  10
   1   2   1 508.985 30.6538   5
  -1   2  -1 488.703 30.7347   8
  -1   2  -1 541.393 30.6734   9
  -1  -2  -1 497.018 30.5683   1
  -1  -2  -1 518.823 30.6680   8
  -1   2  -2 22.9593 1.97734   7
  -1  -2  -2 22.2601 1.62806   3
  -1  -2  -2 23.7508 1.61701   9
   1  -2   2 21.1054 1.48831  16
  -1  -2  -2 23.0468 1.42741  15
  -1  -2  -2 21.5735 1.47721   7
  -1  -2  -2 23.0074 1.60967  14
   1  -2   2 21.8505 1.58111   4
   1  -2   2 23.2681 1.60877  15
  -1  -2  -2 26.0609 1.60117   8
  -1   2  -2 18.6461 2.00086   6
  -1   2  -2 22.9987 1.81266   8
  -1   2  -2 19.6210 1.67179   9
  -1  -2  -2 20.9506 1.45922   1
   1  -2   2 24.3946 1.63936  10
  -1  -2  -3 36.7857 2.56234   5
   1  -2   3 39.2448 2.64170   4
   1   2   3 39.8367 2.31190  13
  -1  -2  -3 39.8301 2.44945   8
   1   2   3 36.9156 2.43829   8
  -1   2  -3 35.6431 2.68617   8
  -1  -2  -3 39.2412 2.36119   1
  -1  -2  -3 42.3795 2.57264   3
  -1  -2  -3 38.9272 2.42101  15
   1  -2   3 37.5914 2.43423  16
   1   2   3 34.8589 2.45547   9
   1  -2   3 41.0344 2.57579  15
  -1   2  -3 41.8693 2.55819   1
  -1  -2  -3 42.3886 2.52329   9
   1   2   3 37.5603 2.40806   7
  -1  -2  -3 33.5164 2.65481   2
   1   2   3 39.1976 2.37016   1
   1  -2   3 37.6737 2.65893  10
  -1   2  -3 38.0742 2.87498   7
  -1   2  -3 36.8577 2.60483   9
   1   2   4 403.456 22.6934   9
  -1   2  -4 399.092 22.7126  16
   1   2   4 391.284 22.5965  13
   1   2   4 367.791 22.6619   8
   1  -2   4 393.722 22.9637   4
  -1   2  -4 370.338 22.7641  13
  -1  -2  -4 377.899 22.8267   5
   1   2   4 403.641 22.6523   7
  -1  -2  -4 412.384 22.7444  15
  -1  -2  -4 385.568 22.5834   1
  -1  -2  -4 397.713 22.9692   2
   1   2   4 392.621 22.5905   1
  -1   2  -4 409.623 23.1074   7
  -1   2  -4 402.256 22.7872   1
  -1   2  -4 374.698 22.8322   9
  -1  -2  -4 388.566 22.7277   9
   1  -2   4 393.414 22.9379  10
   1   2   4 386.861 22.7675   3
  -1  -2  -4 373.506 22.7952   3
   1  -2   4 393.889 22.8586  15
  -1   2  -4 368.685 22.9088   8
  -1   2  -5 4.01978 0.66241   1
   1   2   5 4.01863 0.47323   9
  -1   2  -5 4.02344 0.86148   8
  -1  -2  -5 4.03877 0.69897   3
   1   2   5 4.53244 0.49682   8
  -1  -2  -5 4.47516 0.41216  13
  -1  -2  -5 4.29414 0.55519   9
  -1   2  -5 4.33545 0.69801  13
  -1   2  -5 5.14197 1.19331   7
   1  -2   5 4.29509 0.87537   8
  -1   2  -5 3.76320 0.59299  16
   1   2   5 4.59952 0.62734   3
  -1  -2  -5 5.84408 0.80648   5
   1  -2   5 3.87182 1.05214   4
   1   2   5 3.45232 0.39850  13
   1  -2   5 6.08439 1.07109  10
   1  -2   5 4.20807 0.72650  15
  -1  -2  -5 4.03187 0.93088   2
   1   2   5 3.94560 0.72614   5
  -1  -2  -5 4.20286 0.64155  15
  -1   2  -5 2.62745 0.76874   9
   1  -2   6 163.663 9.87565   4
  -1  -2  -6 161.511 9.32407   9
   1  -2   6 151.085 9.60923  15
   1  -2   6 149.478 9.39422  16
  -1   2  -6 168.882 9.42978  16
  -1   2  -6 165.801 9.53233   1
   1  -2   6 168.371 9.83276  10
   1   2   6 162.131 9.50514   5
  -1  -2  -6 156.937 9.54367   5
   1   2   6 161.735 9.28378   9
  -1   2  -6 175.736 9.51011  13
   1  -2   6 161.106 9.68134   8
  -1  -2  -6 156.136 9.75904   2
   1   2   6 167.906 9.41882   3
   1   2   6 158.531 9.28788   8
   1   2   6 128.211 9.30479  13
  -1   2  -6 157.103 9.55337   9
  -1  -2  -6 152.664 9.48697   3
  -1  -2  -6 168.401 9.90245  10
  -1   2  -6 164.737 9.62752   8
  -1  -2  -6 176.495 9.53346  15
  -1  -2  -6 160.272 9.29439  13
  -1   2  -7 41.9444 2.75309   1
   1  -2   7 40.6970 3.19723   4
   1  -2   7 39.3813 3.09736  10
  -1   2  -7 37.7688 2.79002   8
  -1   2  -7 42.0398 2.61051  16
  -1  -2  -7 36.0610 2.66045   3
  -1   2  -7 39.9064 2.77337   9
   1   2   7 40.3589 2.58134   3
   1   2   7 39.2141 2.50489  13
  -1  -2  -7 38.7950 2.74787   5
   1   2   7 40.6834 2.70343   5
   1  -2   7 39.9690 2.61490  16
   1  -2   7 39.5150 2.90545   8
   1   2   7 38.4403 2.43443   8
  -1  -2  -7 41.4331 2.48964  13
  -1   2  -7 43.6210 2.70556  13
  -1  -2  -7 40.0259 3.00976   2
  -1  -2  -7 45.1458 2.78308  15
  -1  -2  -8 12.2570 1.28533   5
   1  -2   8 13.1578 1.85696   7
  -1  -2  -8 12.4222 0.98022  13
  -1   2  -8 14.2471 1.32616   1
  -1   2  -8 12.6939 1.32446   8
   1   2   8 14.6552 1.05481  13
  -1   2  -8 12.4382 1.20786  13
  -1   2  -8 12.4048 1.29642   9
   1  -2   8 11.4635 1.81143   4
   1   2   8 11.5599 1.26923  15
   1  -2   8 13.9072 1.88828  10
  -1   2  -8 12.4723 1.09420  16
   1  -2   8 13.3108 1.14277  16
  -1  -2  -8 14.0146 1.29001  15
   1  -2   8 11.7976 1.43632   8
  -1  -2  -8 14.3535 1.17184   3
   1   2   8 12.4891 1.64433   2
   1   2   8 13.2241 1.22966   5
   1   2   9 1.00981 0.48298  13
  -1  -2  -9 0.69511 0.71571  15
  -1   2  -9 0.53456 0.73308  13
  -1   2  -9 0.25830 0.75854   9
  -1   2  -9 0.56220 0.79824   8
   1  -2   9-0.20255 1.43461   4
  -1   2  -9-0.47000 0.84852   1
   1  -2   9 0.47128 0.62448  16
  -1  -2  -9 0.60473 0.63148   3
   1  -2   9 0.72712 1.40387  10
  -1  -2  -9 1.23947 0.47145  13
  -1  -2  -9 0.67232 0.79589   5
   1  -2   9 0.36079 0.92050   8
   1   2   9-0.30318 1.19256   2
   1  -2   9 0.19751 1.26861   7
   1   2   9 0.55274 0.82592  15
   1   2   9 1.23711 0.73968   5
  -1  -2 -10 209.244 12.0639  15
   1  -2  10 198.688 12.1971  15
   1   2  10 206.319 12.3568   2
   1  -2  10 197.383 12.6259   4
   1  -2  10 209.856 12.5677  10
   1  -2  10 197.602 11.7909  16
   1  -2  10 199.285 12.1137   8
  -1  -2 -10 194.457 11.8185   3
   1  -2  10 185.168 12.4863   7
   1   2  10 165.579 11.9978  15
  -1  -2 -10 190.305 12.5428  10
  -1   2 -10 221.656 12.0110   8
  -1   2 -10 195.789 11.9879   1
   1   2  10 198.036 11.7300  16
  -1   2 -10 217.997 11.9312  13
   1   2  10 201.787 11.8740   5
   1   2  10 197.079 11.7439  13
  -1   2 -10 200.422 11.9135   9
  -1  -2 -10 193.456 11.6913  13
   1   2  11-0.17547 1.39233   2
  -1  -2 -11 0.42458 0.63207   3
  -1  -2 -11 0.20152 1.15553   2
  -1   2 -11 1.07101 0.87396  13
   1   2  11 1.47828 0.62410  13
   1   2  11 1.94541 1.07808  15
  -1  -2 -11-0.95987 1.30409  10
   1  -2  11-0.75083 1.56300   4
  -1   2 -11 1.65134 0.88827   8
   1  -2  11-0.74662 0.78682  16
   1  -2  11 0.22291 1.44096  10
  -1   2 -11 1.43991 0.99918   1
   1   2  11 1.30488 0.84598   5
   1  -2  11 0.23192 1.50918   7
  -1  -2 -11-0.10086 0.52484  13
  -1   2 -11 1.09979 0.79906   9
  -1  -2 -11-0.12206 0.89758  15
   1   2  11 0.05314 0.59018  16
  -1   2 -11 0.21014 1.16338   2
   1  -2  11 0.26444 0.99207   8
   1  -2  11 0.15620 0.96167  15
  -1   2 -12 146.259 9.56233   1
   1  -2  12 145.097 9.64680   8
   1   2  12 155.703 9.27089  16
  -1  -2 -12 148.698 10.0834   2
   1   2  12 135.287 9.66699  15
   1  -2  12 148.213 9.34433  16
  -1   2 -12 179.248 9.21629  11
   1  -2  12 143.627 9.78874  15
  -1   2 -12 160.525 9.58385   5
  -1   2 -12 148.841 9.38284   9
  -1   2 -12 158.852 10.1514   2
  -1  -2 -12 153.813 9.26166  13
   1  -2  12 144.739 10.1928   7
  -1  -2 -12 176.721 9.74713  15
   1  -2  12 158.259 10.2917  10
  -1  -2 -12 150.976 9.33659   3
  -1  -2 -12 142.329 10.2246  10
   1   2  12 155.488 9.33530  13
   1   2  12 161.564 9.99370   2
  -1   2 -12 159.098 9.49427  13
   1  -2  12 151.035 10.3995   4
   1  -2  13 41.2791 3.27784   8
  -1  -2 -13 38.6350 2.79450  13
  -1   2 -13 45.4147 3.10389  13
  -1   2 -13 43.9411 3.20321   1
  -1   2 -13 43.0720 3.74173   2
  -1  -2 -13 37.4730 3.87960  10
   1  -2  13 37.4781 3.86781   7
   1   2  13 45.5006 2.83268  16
  -1   2 -13 39.6044 4.06039  10
  -1  -2 -13 40.4079 3.27629  15
   1  -2  13 35.2524 3.35583  15
   1  -2  13 43.0313 3.94178  10
  -1  -2 -13 39.8198 3.71258   2
   1   2  13 36.6494 3.49505  14
  -1   2 -13 38.5162 2.91616  16
   1   2  13 44.8934 3.66795   2
  -1  -2 -13 41.2182 2.85861   3
   1  -2  13 37.5844 4.00597   4
   1  -2  13 42.5719 2.92497  16
  -1   2 -13 39.6365 3.11459   5
   1   2  13 47.7911 2.96357  13
  -1   2 -13 40.0472 2.88070   9
   1   2  13 41.1535 3.35968  15
  -1   2 -13 53.6704 2.76998  11
  -1   2 -14 47.9626 3.44519   1
  -1   2 -14 48.2580 3.43197   5
   1  -2  14 43.2649 4.14698   7
   1  -2  14 36.0068 4.05899  10
   1   2  14 40.5593 2.99373  16
   1  -2  14 41.1419 3.43077   8
   1   2  14 34.4646 3.63533  14
   1  -2  14 48.3256 4.43582   4
  -1  -2 -14 37.8687 4.05720  10
  -1   2 -14 51.7623 4.23185   2
   1   2  14 48.2021 3.62793   7
  -1  -2 -14 42.5783 3.01250   3
  -1  -2 -14 43.9639 3.99909   2
   1   2  14 43.2690 3.14129  13
  -1   2 -14 46.2496 3.01997   9
   1   2  14 45.4142 3.60682  15
   1  -2  14 41.5326 3.09178  16
  -1  -2 -14 45.0872 3.01278  13
   1  -2  14 40.8988 3.60940  15
  -1   2 -14 43.8152 3.27445  13
  -1   2 -14 43.0261 4.28803  10
  -1   2 -14 62.0742 2.96577  11
   1   2  14 50.4299 4.00488   2
  -1  -2 -14 48.9086 3.56673  15
   1  -2  15 14.0655 1.80731   8
   1  -2  15 15.2554 2.02402  15
  -1  -2 -15 14.4034 2.56987  10
   1   2  15 12.4207 1.31809  16
   1   2  15 10.9718 2.01459  14
   1   2  15 11.9452 1.89922  15
  -1  -2 -15 11.1834 2.30367   2
   1  -2  15 14.8188 3.02217   4
  -1   2 -15 15.8274 1.80948   1
  -1   2 -15 15.8482 2.85327  10
  -1   2 -15 15.7583 1.21952   9
   1   2  15 14.8529 2.42855   2
  -1  -2 -15 14.5503 1.32256  13
   1  -2  15 13.5853 2.58777   7
   1  -2  15 9.95741 2.53561  10
  -1  -2 -15 10.8069 1.73244   5
  -1   2 -15 13.2803 1.02737  11
   1   2  15 11.7834 1.47789  13
   1   2  15 11.8104 1.91270   7
  -1   2 -15 15.6948 2.73961   2
  -1   2 -15 11.5969 1.68255   5
  -1  -2 -15 12.7995 1.21821   3
  -1   2 -15 16.4494 1.68768  13
   1  -2  15 13.7728 1.44940  16
   1   2  16 46.3522 3.37465  13
   1   2  16 50.2266 3.95171   7
   1  -2  16 43.9319 4.53445   7
  -1   2 -16 45.4005 3.63497   5
   1   2  16 42.7168 4.04201  14
  -1  -2 -16 45.8077 4.30547   2
   1   2  16 43.6926 3.83161  15
   1   2  16 52.0060 3.20129  16
   1  -2  16 46.8539 3.63008   8
  -1  -2 -16 49.1367 3.69569   5
  -1   2 -16 45.1867 3.59922   1
   1   2  16 50.0290 4.31253   2
  -1   2 -16 43.2171 4.65453  10
  -1  -2 -16 50.8138 3.22830  13
   1  -2  16 47.5905 3.29199  16
  -1   2 -16 47.8963 4.48281   2
   1  -2  16 49.5385 4.02198  15
  -1   2 -16 46.6240 2.89895  11
  -1  -2 -16 41.1129 4.49858  10
  -1   2 -16 51.7673 3.50155  13
  -1  -2 -16 47.9223 3.05664   3
  -1   2 -17 7.57585 1.72468   5
   1   2  17 9.26700 1.98802  15
  -1   2 -17 11.1490 1.51400  13
   1   2  17 10.4846 2.12491  14
  -1   2 -17 9.45170 2.67750   2
   1  -2  17 6.53514 1.55733   8
   1  -2  17 9.84053 2.57380   7
  -1  -2 -17 3.85665 2.26003   2
  -1  -2 -17 11.9940 1.85850   5
  -1   2 -17 8.28216 1.61213   1
   1  -2  17 7.46717 1.30157  16
   1   2  17 9.39209 1.20188  16
   1   2  17 9.56962 1.45810  13
  -1   2 -17 15.6008 3.00035  10
   1  -2  17 11.1127 2.03659  15
  -1   2 -18 53.6481 4.95461   2
   1   2  18 49.7285 4.26479   7
  -1  -2 -18 41.4299 4.80673  10
  -1   2 -18 44.8093 3.92028   5
   1  -2  18 57.9415 5.12742   7
  -1   2 -18 54.2189 5.35069  10
  -1   2 -18 58.2397 3.91570   1
   1  -2  18 51.4267 4.37697  15
   1   2  18 53.7849 4.48364  14
   1   2  18 49.5342 3.36660  16
   1  -2  18 49.3666 3.77374   8
  -1  -2 -18 47.2322 3.94850   5
   1  -2  18 51.5061 3.52123  16
  -1  -2 -18 54.3825 4.91752   2
   1  -2  18 49.7539 4.42183  14
   1   2  18 46.9935 4.22007  15
  -1   2 -19 8.01742 2.97037   2
  -1   2 -19 5.96550 1.77925   5
  -1  -2 -19 3.53220 2.56247  10
   1   2  19 4.73368 2.02499  14
   1  -2  19 2.12855 2.07986  14
   1  -2  19 0.75032 2.62138   7
  -1  -2 -19 6.01485 1.87474   5
   1  -2  19 7.30479 2.03490  15
   1   2  19 3.19381 1.93907  15
   1   2  19 1.21732 1.84004   7
  -1  -2 -19-0.36439 2.38159   2
  -1   2 -19 3.55914 2.99687  10
  -1   2 -20 14.6123 3.84380  10
   1   2  20 17.2629 2.71213   7
   1  -2  20 17.1819 3.05783  14
   1   2  20 17.6652 2.72276  15
   1   2  20 17.7724 2.80439  14
   1  -2  20 19.8466 2.71259  15
   1  -2  20 14.8822 3.30876   7
  -1  -2 -20 19.7819 3.60852   2
  -1   2 -20 18.3226 3.47293   2
  -1   2 -21 4.06266 3.08797   2
   1  -2  21-1.62597 2.87834   7
   1  -2  21 3.00327 3.80404   6
   1   2  21 0.35613 2.28674  14
   1  -2  21 1.03348 2.13602  14
   1   2  21-0.91253 1.97945  15
  -1  -2 -21-0.81702 2.87653   2
  -1   2 -21 4.99277 3.29116  10
  -1   2 -22 45.2542 5.14428   2
   1  -2  22 27.3816 3.92996  14
   1   2  22 40.6853 4.29120  14
   1  -2  22 41.2876 4.34952  15
  -1  -2 -22 42.0723 4.83244   2
  -1   2 -22 45.8795 5.48367  10
   1  -2  22 39.7110 5.82822   6
   1  -2  22 43.2214 4.82882   7
   1   2  22 34.9482 3.97072  15
   1   2  23 3.78213 2.56557  15
   1  -2  23 6.88817 3.28628   7
   1  -2  23 2.69724 2.66319  14
   1  -2  23 5.93277 4.32440   6
   1  -3 -24 5.57465 3.23227   2
  -1  -3  24 5.50912 3.48109   7
  -1  -3  23-3.89223 3.61418   7
  -1  -3  23 1.34727 4.41268   6
  -1  -3  23 0.73375 2.35733  14
  -1   3  23 2.56134 2.33097  15
  -1  -3  22 0.99458 2.04093  15
   1   3 -22-0.46588 2.95073   2
  -1   3  22 3.32739 2.29171  15
  -1   3  22 0.15089 1.38923  13
   1  -3 -22-0.39127 2.75529   2
  -1  -3  22 4.70137 3.36586   7
   1   3 -22-0.52035 3.24955  10
  -1  -3  21 0.31070 2.17604  15
  -1   3  21 0.85259 1.83775  15
  -1  -3  21-1.35531 3.30406   7
  -1   3  21 0.57055 1.33080  13
   1  -3 -21 3.31245 2.86972  10
  -1  -3  21 2.50578 1.83163   8
   1   3 -21 0.88057 2.78883   2
   1  -3 -20 16.7802 3.20402   2
  -1   3  20 12.0746 1.80183  13
   1   3 -20 14.3943 3.67661  10
  -1  -3  20 14.7059 3.39188   7
   1  -3 -20 12.4729 3.30859  10
  -1   3  20 13.2569 2.48399   7
   1   3 -20 14.9157 3.35874   2
  -1   3  20 17.1061 2.65223  15
  -1  -3  20 15.6808 2.62057  15
   1   3 -19 17.9039 3.58756  10
  -1  -3  19 16.1138 2.47420  15
   1   3 -19 15.6265 2.02595   5
   1   3 -19 17.7694 3.28926   2
  -1  -3  19 14.3320 1.62962  16
   1  -3 -19 12.4544 2.87073   2
  -1   3  19 10.7770 2.28154  15
  -1  -3  19 18.2006 2.46971   8
   1   3 -19 17.0745 2.26012   1
  -1  -3  19 12.3715 3.13934   7
   1  -3 -19 17.1154 3.38219  10
  -1   3  18 32.9140 2.52841  13
   1  -3 -18 26.7769 3.55096   2
  -1  -3  18 29.0529 2.33915  16
   1   3 -18 31.5079 2.98814   1
   1  -3 -18 31.2495 4.05794  10
   1  -3 -18 29.3256 2.65207   5
  -1  -3  18 25.4648 3.90691   7
   1   3 -18 34.3031 2.83685   5
  -1  -3  18 27.4714 3.09007  15
   1   3 -18 36.0710 3.94509   2
  -1   3  18 29.6666 3.11462  15
   1   3 -18 31.5166 4.01386  10
  -1   3  18 27.8235 2.07440  16
  -1   3  17 4.86479 0.83048  16
   1   3 -17 4.61573 2.59683  10
  -1   3  17 1.64896 1.89524   2
   1  -3 -17 3.99312 0.98504  13
  -1  -3  17 3.85891 1.11737  16
   1   3 -17 5.50034 1.18814  16
   1   3 -17 3.81865 1.57513   1
  -1  -3  17 4.45084 2.41151   7
  -1   3  17 5.87149 1.24749  13
  -1   3  17 1.95463 1.49085  15
   1  -3 -17 5.46723 2.43189  10
   1   3 -17 4.32718 2.30521   2
  -1  -3  17 6.60427 1.85634  15
  -1  -3  17 5.26545 1.81801   8
   1   3 -17 5.63677 1.46273   5
   1  -3 -17 3.72914 1.90877   2
  -1   3  16 16.1516 1.35197  16
   1  -3 -16 17.9398 2.75532  10
   1   3 -16 17.4394 1.96242  13
  -1  -3  16 16.7164 2.30647   8
   1   3 -16 21.4841 1.73368  16
   1   3 -16 19.0478 1.98968   5
  -1  -3  16 20.4193 2.32063  15
   1   3 -16 12.6629 2.70751   2
   1  -3 -16 17.3513 1.52400  13
   1  -3 -16 12.8812 2.53183   2
  -1  -3  16 14.7347 1.58748  16
  -1   3  16 18.7675 1.70859  13
   1   3 -16 20.5932 2.25364   1
  -1   3  16 14.8588 2.10076  15
   1   3 -16 17.1104 1.87631   3
  -1   3  16 15.4563 1.25568   8
   1   3 -16 16.5000 3.06778  10
  -1  -3  16 18.6763 3.19734   4
  -1   3  16 18.8250 2.55503   2
  -1   3  16 16.5109 1.27684   8
  -1  -3  16 21.7085 3.14648   7
   1  -3 -15 15.9040 2.39226   2
  -1   3  15 15.7241 2.87419  10
   1   3 -15 17.2408 2.52431   2
   1   3 -15 14.6420 1.70691  13
   1  -3 -15 12.4396 1.27022  13
  -1   3  15 13.3865 1.17823   8
  -1   3  15 14.9471 1.48787  13
  -1   3  15 14.6775 2.28614   2
   1   3 -15 9.68180 2.72018  10
  -1  -3  15 12.6006 2.64610   7
  -1   3  15 14.1042 1.18847  16
   1   3 -15 15.5481 1.69039   3
  -1  -3  15 13.8573 2.16761   8
  -1  -3  15 11.1310 2.70528   4
   1   3 -15 14.6911 1.46420   9
   1   3 -15 12.7660 1.87304  15
  -1  -3  15 14.2137 1.46734  16
   1   3 -15 13.3198 1.95320   1
  -1  -3  15 12.5526 1.92139  15
  -1  -3  15 10.4009 2.51275  10
  -1   3  15 10.6614 1.83337  15
   1  -3 -15 15.3860 2.59388  10
   1   3 -15 14.7678 1.47006  16
  -1   3  15 14.3675 2.94525   4
  -1   3  15 13.2357 2.60236  17
   1   3 -14 36.6884 2.98711   1
  -1   3  14 32.9907 2.33428   8
   1   3 -14 35.7684 3.67957  10
  -1  -3  14 38.2332 3.10273  15
   1   3 -14 35.8801 2.57173  16
   1  -3 -14 32.8992 2.44960  13
  -1   3  14 37.3002 2.34084  16
  -1   3  14 32.9950 3.22740   2
  -1   3  14 40.6701 3.88082  10
  -1   3  14 36.0614 2.38838   8
  -1  -3  14 30.3574 3.51685  10
   1   3 -14 40.0508 3.06569  15
   1   3 -14 35.5019 2.75741  13
  -1  -3  14 28.2902 3.53659   7
  -1   3  14 37.0990 2.55853  13
   1  -3 -14 28.6520 3.41684  10
  -1  -3  14 34.4556 3.81359   4
  -1   3  14 30.5585 2.88772  15
  -1   3  14 37.1336 4.10825   4
   1   3 -14 37.2911 3.49195   2
  -1  -3  14 38.3466 2.58099  16
   1  -3 -14 34.3841 3.30961   2
   1   3 -14 39.6921 2.81675   3
  -1   3  14 37.5769 3.59920  17
   1   3 -14 34.9004 2.61951   9
  -1  -3  14 30.5184 3.13782   8
  -1   3  13 68.5495 4.84479  17
   1   3 -13 61.1353 4.22859   1
  -1   3  13 63.4495 4.98196  10
  -1  -3  13 59.5242 4.25507  15
   1  -3 -13 54.8913 3.69313  13
   1  -3 -13 57.0003 4.68900  10
  -1   3  13 60.9603 4.42644   2
   1   3 -13 63.3185 4.21860  15
  -1  -3  13 57.4925 4.91644   4
   1   3 -13 64.0847 4.98078  10
   1  -3 -13 55.7724 4.44687   2
  -1   3  13 53.8539 4.14326  15
  -1   3  13 58.9178 3.68197   8
  -1   3  13 55.8977 3.63275   8
  -1   3  13 61.7405 5.18597   4
   1   3 -13 58.8170 3.99015  13
  -1  -3  13 56.3237 4.88065   7
  -1  -3  13 60.3542 4.42286   8
   1   3 -13 62.6056 3.96528   9
  -1   3  13 59.1503 3.79927  13
   1   3 -13 57.5171 4.01469   3
  -1   3  13 54.3450 3.59717  16
  -1  -3  13 58.0423 3.79821  16
   1   3 -13 60.8930 4.64827   2
  -1  -3  13 55.1856 4.76516  10
   1   3 -12 22.5385 2.17533   1
  -1   3  12 26.9544 2.72416  17
   1  -3 -12 21.0551 1.88771   5
   1   3 -12 21.7511 1.94044  13
   1  -3 -12 22.2603 1.67956  13
  -1  -3  12 21.4414 2.73071  10
   1   3 -12 22.9512 2.08947  15
  -1   3  12 22.5553 2.07214  15
  -1   3  12 24.0199 3.16178   4
  -1   3  12 26.3294 2.87914  10
  -1   3  12 21.4331 1.56932  16
   1   3 -12 25.5307 2.12847   8
  -1  -3  12 18.0453 2.27827   8
   1  -3 -12 18.3482 2.30921   2
   1   3 -12 20.5709 1.93193   9
   1  -3 -12 25.7878 2.68485  10
  -1  -3  12 19.5580 2.68405   4
   1   3 -12 25.4513 2.03948   3
  -1   3  12 23.2524 1.73965  13
  -1  -3  12 21.7664 2.12711  15
  -1  -3  12 18.2667 2.66341   7
  -1   3  12 25.4092 1.78776   5
   1   3 -12 23.0719 2.79646  10
  -1  -3  12 21.3240 1.73624  16
   1   3 -12 25.1165 2.60541   2
  -1   3  12 20.9140 2.33545   2
  -1   3  12 22.5559 1.67049   8
   1   3 -11 3.95427 1.10737   3
   1   3 -11 3.03929 0.95457   9
  -1  -3  11 2.13723 0.97270  15
   1   3 -11 2.35818 1.10196   8
  -1   3  11 2.79696 1.37757  17
  -1  -3  11 3.28467 0.76707  16
  -1   3  11 4.76659 0.72035   8
   1   3 -11 1.90712 1.06106   1
   1  -3 -11 3.95846 0.68255  13
   1  -3 -11 3.37977 0.98769   5
  -1   3  11 2.93602 0.70184  13
  -1   3  11 1.08052 1.88848   4
   1   3 -11 2.91193 1.02722  15
  -1   3  11 3.79732 1.35756   2
  -1   3  11 3.63304 1.01761  15
   1  -3 -11 3.09023 1.38922  10
   1   3 -11 4.67894 1.79704   4
   1   3 -11 3.38593 1.65361  10
   1   3 -11 3.31673 0.95677  13
   1   3 -11 1.96917 1.25910   2
  -1  -3  11 3.05774 1.26070   8
  -1   3  11 2.70872 0.28803  12
  -1   3  11 3.43531 0.77680   5
  -1  -3  11 2.43592 1.67820  10
  -1   3  11 4.56220 1.84182  10
  -1  -3  11 2.03931 1.64580   7
  -1  -3  11 1.84413 1.65930   4
   1   3 -10 6.14642 1.68772  10
   1   3 -10 4.55778 1.01517   9
   1  -3 -10 6.20962 1.03733   5
   1   3 -10 6.53455 1.17604   8
   1   3 -10 5.28716 1.04431  15
  -1  -3  10 5.37118 0.88851  16
  -1   3  10 5.33426 0.47307  12
   1   3 -10 5.56347 1.35386   2
  -1   3  10 8.32073 1.64829  17
  -1   3  10 6.99011 0.83687  13
   1   3 -10 6.26532 1.76351   4
  -1  -3  10 6.04668 1.04642   9
  -1   3  10 5.97947 1.76581  10
  -1   3  10 6.41195 1.03745  15
  -1   3  10 5.21229 0.63702   3
  -1   3  10 6.26639 0.83437   8
  -1  -3  10 5.25215 1.50664  10
  -1   3  10 8.62319 0.91649   5
   1   3 -10 7.56780 1.23368   1
   1   3 -10 5.98370 1.01534  13
  -1  -3  10 5.39346 1.65749   4
  -1   3  10 5.55397 1.41932   2
   1  -3 -10 4.52687 0.74001  13
  -1   3  10 5.52049 0.53646   9
  -1   3  10 9.55415 2.03029   4
  -1  -3  10 5.79647 1.37887   8
   1   3  -9 26.2119 2.76883   4
  -1   3   9 32.0696 2.03942   8
  -1   3   9 25.6676 1.86517   9
  -1  -3   9 23.1081 2.64447   4
   1   3  -9 28.5412 2.79098  10
  -1   3   9 30.0774 2.06380   5
  -1   3   9 28.5475 2.97809   4
  -1  -3   9 25.6702 2.44562   8
  -1   3   9 29.5994 2.63090  17
  -1   3   9 31.2082 2.87341  10
  -1  -3   9 30.2723 2.76422  10
  -1   3   9 34.6410 2.57828   2
  -1   3   9 28.9466 1.94589  13
   1  -3  -9 29.4043 1.92398  13
   1   3  -9 27.5191 2.18917  15
   1  -3  -9 28.7702 2.13246   5
  -1   3   9 27.7469 1.90792   3
  -1  -3   9 29.1153 2.26817   9
   1   3  -9 24.0714 2.26270   1
  -1   3   9 29.4448 2.20429  15
   1   3  -9 26.6353 2.24012   9
   1   3  -9 30.5796 2.34431   8
  -1  -3   9 28.3369 2.00660  16
   1   3  -9 28.6701 2.12094  13
  -1   3   8 45.5874 3.17379   2
  -1   3   8 46.0283 3.30125  17
  -1   3   8 39.0323 2.86289  15
   1  -3  -8 41.4087 3.12354   2
  -1   3   8 47.6012 3.61335   4
   1   3  -8 41.8458 3.00285   9
   1   3  -8 43.1576 3.05011   1
  -1  -3   8 42.8091 3.34087   4
   1   3  -8 42.1332 2.86021  13
  -1  -3   8 40.3290 2.97887   9
  -1   3   8 42.8011 2.68408  13
   1   3  -8 42.4027 3.41548   4
  -1   3   8 43.9766 3.37830  10
   1   3  -8 43.8663 3.07050   8
   1   3  -8 50.0185 2.97611  15
  -1  -3   8 41.6989 2.74527  16
  -1   3   8 41.0967 2.79639   5
  -1   3   8 41.1984 2.76776   8
   1   3  -8 38.7555 3.35980  10
  -1  -3   8 36.3775 3.13526   8
  -1   3   8 38.9205 2.69094   9
   1  -3  -8 41.3750 2.86729   5
  -1   3   8 41.1877 2.70793   3
  -1  -3   8 41.5402 3.35628  10
  -1   3   7 73.2460 5.02000   4
   1  -3  -7 77.2111 4.45675   5
   1  -3  -7 65.5827 4.75559  10
  -1   3   7 69.2326 4.67314   2
  -1  -3   7 66.4105 4.80246   4
   1   3  -7 72.8028 4.89493  10
  -1   3   7 74.6368 4.81547  17
   1  -3  -7 66.2324 4.63052   2
   1   3  -7 75.6513 4.47622  13
  -1   3   7 65.3366 4.37476   8
  -1   3   7 70.0291 4.39491   5
  -1   3   7 72.9212 4.27555  13
  -1  -3   7 66.5197 4.50875  15
  -1  -3   7 76.2058 4.50112   1
   1   3  -7 67.8130 4.45737  15
  -1  -3   7 73.6567 4.62723   9
  -1   3   7 64.7460 4.43844  15
  -1   3   7 74.0901 4.89589  10
  -1   3   7 64.9097 4.34839   3
  -1   3   7 66.6674 4.34735   9
  -1  -3   7 67.7539 4.34168  16
   1   3  -7 64.6254 4.56470   1
  -1  -3   7 59.7320 4.77450  10
  -1   3   7 74.4843 4.20478  11
   1   3  -7 75.1948 4.38496  16
   1   3  -7 72.8941 4.92860   4
  -1  -3   7 66.0454 4.75010   8
   1   3  -7 76.7085 4.69386   8
   1   3  -7 67.2282 4.59525   9
  -1   3   6 37.7644 2.79517   5
   1   3  -6 43.9223 3.07158   8
  -1   3   6 40.5955 2.79335   3
   1   3  -6 41.7619 2.82406  13
   1   3  -6 44.0167 2.98965   3
  -1   3   6 42.3941 3.09975  17
   1   3  -6 39.4047 3.15875  10
  -1   3   6 40.8425 3.13955  10
   1   3  -6 42.1697 3.01831   9
  -1   3   6 39.5166 2.77786   9
   1   3  -6 42.6888 2.77161  16
  -1  -3   6 41.7273 3.19628  10
  -1  -3   6 40.1774 3.00275   9
  -1   3   6 43.9395 3.36360   4
  -1  -3   6 43.8475 2.87342  15
   1   3  -6 43.2102 3.00320   1
   1  -3  -6 37.8336 3.06255  10
  -1   3   6 41.8769 2.66386  13
   1  -3  -6 42.6779 2.82499   5
  -1   3   6 48.5761 2.90203   6
  -1   3   6 42.4392 2.80510   7
   1  -3  -6 41.3079 3.00144   2
  -1  -3   6 41.7910 2.74674  16
  -1   3   6 38.0793 2.80358   8
   1   3  -6 44.1839 3.21061   4
  -1   3   6 43.4583 2.57571   1
   1   3  -6 42.0796 2.82386  15
  -1   3   6 57.8112 2.73131  11
  -1  -3   6 37.8956 3.09006   4
  -1   3   6 43.9026 3.04380   2
  -1   3   6 39.1294 2.80047  15
  -1   3   5 63.0197 4.34521  17
   1   3  -5 62.4493 4.31486   9
  -1   3   5 67.4515 3.99573  13
   1   3  -5 60.0297 4.26974   1
  -1   3   5 67.0160 4.17195   7
   1   3  -5 60.8470 4.08280  15
   1  -3  -5 65.0690 4.28554   2
  -1   3   5 66.3284 4.17206   8
  -1   3   5 65.7165 4.48877   4
  -1  -3   5 67.5047 4.14647  15
  -1   3   5 79.8805 4.01990  11
  -1  -3   5 60.9085 4.33431   4
   1   3  -5 66.6121 4.08758  16
   1   3  -5 68.1807 4.41039   4
  -1  -3   5 68.1341 4.47768  10
  -1   3   5 67.6140 4.16815   5
   1   3  -5 64.7784 4.36276   8
  -1   3   5 66.8761 3.94447   1
  -1   3   5 64.5078 4.36089  10
   1   3  -5 66.6070 4.29409   3
  -1   3   5 62.0727 4.13490   9
   1  -3  -5 61.9625 4.32803  10
  -1   3   5 64.4092 4.27205   2
   1   3  -5 67.8008 4.14979  13
  -1   3   5 60.1734 4.13857   3
   1   3  -5 57.6963 4.41750  10
  -1   3   5 66.3333 4.10573  15
  -1   3   5 65.7927 4.17799   6
  -1  -3   4 82.0137 5.07341  15
   1   3  -4 84.3420 5.03894  15
  -1   3   4 88.0490 5.25739  10
  -1   3   4 78.5987 5.11826   9
  -1   3   4 78.0513 5.14916   8
  -1   3   4 84.3690 5.33269   4
  -1  -3   4 84.7665 5.37751  10
   1   3  -4 85.3009 5.32372   8
   1   3  -4 77.1645 5.51155   7
  -1  -3   4 77.5050 5.19660   4
   1   3  -4 83.4136 5.23249   1
  -1   3   4 81.8044 5.13400   5
   1   3  -4 78.8063 5.08404  13
  -1   3   4 83.7809 5.16826   7
   1   3  -4 80.8936 5.04497  16
   1   3  -4 75.1489 5.29997  10
   1   3  -4 80.4247 5.25623   4
  -1   3   4 82.0389 5.17281   6
  -1   3   4 88.8514 5.22973   2
  -1   3   4 84.3472 5.13847   3
  -1   3   4 91.4454 4.96384   1
   1   3  -4 84.8580 5.25697   3
   1   3  -4 80.0683 5.29923   9
  -1   3   4 87.3011 5.28487  17
   1  -3  -3 107.061 6.00909   8
   1   3  -3 84.1525 6.21998   7
   1   3  -3 93.9119 5.76938  15
  -1  -3   3 77.6729 6.01862   9
  -1   3   3 103.058 6.04642  17
   1  -3  -3 106.808 5.95192   7
  -1   3   3 98.2537 5.99930   4
  -1   3   3 104.695 5.98406   2
  -1  -3   3 102.924 5.90514   4
   1   3  -3 86.6612 5.96073   1
  -1  -3   3 91.7716 5.80227  16
   1   3  -3 101.442 6.03847   3
  -1   3   3 88.3592 5.91284   3
  -1   3   3 86.5471 5.95823   7
   1  -3  -3 108.280 5.94656   6
   1   3  -3 96.1646 6.07224   9
   1   3  -3 95.6939 6.07196   8
   1  -3  -3 91.8372 5.95750  17
  -1  -3   3 97.6051 5.80974  15
   1   3  -3 103.998 5.94749   4
  -1  -3   3 107.124 6.34713   6
  -1   3   3 98.1693 5.94915  10
  -1   3   3 98.1490 6.01247   6
  -1   3   3 97.6188 5.89471   5
  -1   3   2 255.076 14.8541   4
  -1  -3   2 243.487 14.8217   4
   1  -3  -2 248.320 14.9870   8
  -1  -3   2 253.635 14.7750  14
   1   3  -2 258.558 14.9414   1
   1   3  -2 254.403 14.7101  15
   1   3  -2 235.606 15.0034   8
   1   3  -2 245.566 14.8148   4
   1  -3  -2 274.327 15.0067   7
  -1   3   2 244.484 14.7297  14
  -1  -3   2 263.295 14.7467  15
   1  -3  -2 251.491 14.8942  17
   1   3  -2 261.395 14.9997   3
  -1   3   2 263.916 14.8415  10
  -1   3   2 248.221 14.9733  17
   1   3  -2 224.596 15.0010   9
  -1  -3   2 258.960 15.1724   6
   1  -3  -2 256.650 14.9713   6
  -1   3   1 337.227 20.2764  17
   1   3  -1 351.997 19.9683  15
   1  -3  -1 341.850 20.2217  17
   1   3  -1 350.309 20.0582  14
   1  -3  -1 369.305 20.3828   7
  -1  -3   1 361.555 20.0716  14
   1   3  -1 362.567 20.0977   4
   1  -3  -1 362.896 20.0691  16
   1   3  -1 268.079 20.1646   1
  -1  -3   1 329.959 20.4169   7
   1   3  -1 327.456 20.2694   3
  -1  -3   1 379.358 20.4008   6
   1   3  -1 316.053 20.2829   9
  -1   3   1 345.035 19.9732  14
   1  -3  -1 335.036 20.3362   6
   1   3  -1 316.783 20.2794   8
  -1   3   0 12.4429 1.44535   8
  -1   3   0 14.9536 1.49234  17
  -1  -3   0 14.1317 1.48627   7
  -1  -3   0 14.3880 1.13260  14
  -1  -3   0 13.8746 1.43066   8
   1  -3   0 17.4051 1.57642   6
  -1  -3   0 16.3083 1.23075   1
   1   3   0 19.2375 1.46031   3
   1   3   0 15.7142 1.43253   9
  -1  -3   0 15.9430 1.37820   6
   1  -3   0 15.0728 1.38938  17
   1   3   0 15.3155 1.41068   6
  -1   3   0 15.7433 1.37723   9
   1  -3   0 15.8387 1.12284  16
   1   3   0 13.7910 1.11645  14
  -1   3  -1 71.8952 4.38475  10
  -1  -3  -1 65.6960 4.58983   7
   1   3   1 63.4086 4.55740   7
  -1  -3  -1 70.3514 4.58971   9
  -1  -3  -1 76.2921 4.40308  14
  -1  -3  -1 70.3869 4.44362   6
   1   3   1 72.4245 4.38876  14
  -1   3  -1 81.3776 4.46958   1
  -1   3  -1 73.8323 4.40841  15
  -1   3  -1 70.5100 4.57340   9
   1   3   1 70.4522 4.47880   6
   1  -3   1 72.9776 4.70448  17
  -1  -3  -1 76.1632 4.41468   1
   1  -3   1 69.5553 4.83903   6
   1   3   1 73.5027 4.32943  17
  -1  -3  -1 75.8393 4.61257   8
   1  -3   1 67.9632 4.35885  16
  -1   3  -1 62.2567 4.74052   7
  -1   3  -1 69.1398 4.66108   8
  -1  -3  -2 17.6576 1.22169   6
  -1  -3  -2 17.3324 1.45692   3
  -1  -3  -2 16.7959 1.30914  14
   1   3   2 16.1177 1.27180   1
  -1  -3  -2 16.4033 1.45415   8
   1   3   2 14.0918 1.28393  14
   1  -3   2 18.1378 1.22148   4
  -1  -3  -2 18.9583 1.40050   7
   1   3   2 20.0756 1.30266  17
  -1   3  -2 15.2216 1.29678  15
   1  -3   2 18.2046 1.25950  16
  -1  -3  -2 16.8930 1.40063   5
   1   3   2 15.0065 1.40585   7
  -1   3  -2 15.0774 1.80356   7
   1  -3   2 14.9260 1.32876  15
  -1   3  -2 18.1758 1.35749  10
  -1   3  -2 15.6209 1.59142   8
   1  -3   2 14.2283 1.35162  10
   1   3   2 17.3999 1.12183  15
  -1   3  -2 15.8734 1.51309   9
  -1  -3  -2 18.7803 1.24709   1
   1   3   2 16.2870 1.41420   8
  -1  -3  -2 16.4224 1.43853   9
  -1   3  -2 15.4086 1.34535   1
   1   3   2 18.4404 1.33936   6
   1  -3   3 352.531 19.5469  16
  -1  -3  -3 314.463 19.6816   5
  -1  -3  -3 349.533 19.5472   7
  -1   3  -3 317.117 19.7331   9
  -1   3  -3 341.987 19.8570   8
   1   3   3 321.732 19.6404   9
   1  -3   3 326.668 19.6784  10
  -1   3  -3 361.008 20.0366   7
   1   3   3 314.954 19.6093   8
   1  -3   3 344.569 19.6187   4
  -1   3  -3 357.237 19.6507   1
  -1  -3  -3 347.687 19.6959   9
   1   3   3 335.142 19.4787  15
   1   3   3 320.287 19.6829   3
  -1   3  -3 343.339 19.6034  15
   1   3   3 323.620 19.5506   6
  -1  -3  -3 334.871 19.7041   3
   1   3   3 326.398 19.6047   7
  -1  -3  -3 317.614 19.6469   8
  -1   3  -3 344.851 19.7020  10
   1   3   3 362.256 19.6489  17
   1   3   3 304.073 19.5155   1
   1  -3   3 337.254 19.6653  15
  -1  -3  -3 348.710 19.4829   1
   1   3   3 320.828 19.6200  14
   1  -3   4 157.032 9.81934  15
   1   3   4 148.903 9.72703   8
   1  -3   4 166.396 9.87108   4
  -1   3  -4 171.318 9.93934  10
  -1   3  -4 166.654 10.0098   8
  -1  -3  -4 159.668 9.98812   2
   1   3   4 163.249 9.75989   9
  -1  -3  -4 165.714 9.74357   8
   1   3   4 168.331 9.63012   1
  -1  -3  -4 159.008 9.83698   3
   1   3   4 139.728 9.78030  14
  -1   3  -4 171.773 9.79304  15
  -1  -3  -4 149.881 9.77845   9
  -1   3  -4 163.437 9.81326   1
  -1  -3  -4 176.561 9.59367   1
   1   3   4 163.787 9.67893   6
   1   3   4 154.363 9.66343  15
   1   3   4 157.897 10.0194  10
   1   3   4 164.516 9.84179   3
  -1  -3  -4 166.089 9.86189   5
   1   3   4 164.175 9.85619   5
   1   3   4 172.541 9.55918  13
  -1   3  -4 175.406 10.2707   7
  -1   3  -4 155.862 9.90253   9
   1   3   4 157.585 9.70980   7
   1  -3   4 168.482 9.91951  10
   1  -3   5 63.4592 4.28162  10
   1   3   5 70.3125 4.48138  10
   1   3   5 63.6833 4.09378   3
  -1   3  -5 69.0444 4.00352  16
   1   3   5 63.6047 3.81951  13
   1   3   5 62.1590 3.98041  15
   1   3   5 70.5910 4.60687   4
  -1   3  -5 63.3146 4.29643   8
   1   3   5 64.4549 3.99978   9
   1   3   5 60.3651 3.97477   8
  -1   3  -5 75.8968 4.65887   7
  -1   3  -5 61.4098 4.07500  15
  -1  -3  -5 58.1553 4.26961   2
   1   3   5 61.3745 4.33965   2
  -1   3  -5 58.8940 4.20399   9
  -1  -3  -5 57.6127 4.12472   5
  -1  -3  -5 54.7930 4.02736   9
  -1   3  -5 68.0565 4.33924  10
   1  -3   5 64.6845 4.16200  15
   1   3   5 69.0859 3.84935   1
   1  -3   5 64.2040 4.26419   4
  -1   3  -5 71.3891 4.10203  13
   1   3   5 57.1658 3.93389   7
   1   3   5 65.9823 4.13425   5
  -1   3  -5 69.0042 4.13382   1
  -1  -3  -5 64.2241 4.12836   3
   1  -3   6 73.2396 4.62508  10
  -1   3  -6 69.8251 4.61513  10
   1  -3   6 71.8678 4.44770  15
   1   3   6 72.4039 4.88806   4
   1   3   6 57.7041 4.03719  13
  -1   3  -6 67.1511 4.20958  16
  -1   3  -6 70.8171 4.52955   8
   1   3   6 72.5914 4.65582   2
   1  -3   6 73.1181 4.62929   8
  -1  -3  -6 70.4927 4.41495   5
   1   3   6 67.2466 4.15511   9
  -1  -3  -6 69.7340 4.61227   2
  -1   3  -6 67.7420 4.81191   7
   1   3   6 69.0994 4.27845   3
  -1   3  -6 73.4075 4.38551   1
   1  -3   6 67.2305 4.59100   4
   1   3   6 68.0354 4.25779  15
  -1   3  -6 69.9439 4.35894  15
   1   3   6 71.5720 4.74701  10
  -1   3  -6 65.7695 4.43501   9
  -1  -3  -6 66.8059 4.32088   3
  -1  -3  -6 72.0679 4.21801   9
   1   3   6 72.1366 4.36296   5
   1   3   6 62.6833 4.14428   8
   1   3   6 63.2961 4.14396   7
  -1   3  -6 70.2511 4.30929  13
  -1  -3  -7 11.1289 1.34478   5
   1  -3   7 15.2222 1.74648  10
  -1   3  -7 14.5415 1.36744  15
   1   3   7 13.5709 0.98060  13
  -1   3  -7 14.8198 1.30409  13
  -1   3  -7 13.2326 1.72999  10
   1  -3   7 12.2564 1.14191  16
  -1  -3  -7 13.7865 1.10466   9
   1   3   7 15.1622 1.91447  10
   1   3   7 12.4712 1.91027   4
  -1   3  -7 12.5890 1.43584   9
   1   3   7 11.9294 1.17107   3
   1   3   7 11.1553 1.22285  15
   1   3   7 12.6354 1.06772   8
   1   3   7 16.3356 1.70973   2
  -1   3  -7 14.8430 1.42248   1
   1   3   7 14.5242 1.34897   5
   1  -3   7 13.5346 1.63885   8
   1  -3   7 10.4473 1.62808   4
  -1   3  -7 13.2098 1.57189   8
  -1  -3  -7 12.5512 1.28897   3
   1   3   7 15.7378 1.12036   7
   1   3   7 14.6708 1.06929   9
  -1   3  -8 76.2884 5.04075  15
   1  -3   8 76.9356 4.84189  16
  -1   3  -8 74.3376 5.38762  10
   1   3   8 71.9843 4.66428   9
  -1  -3  -8 77.4203 4.94204   3
   1  -3   8 77.2423 5.40528   4
   1   3   8 69.0219 4.68722   8
   1   3   8 76.0046 4.70479  13
   1   3   8 82.4954 4.84756   3
  -1   3  -8 80.9658 4.96851  13
   1   3   8 78.9638 5.54546  10
   1  -3   8 75.2120 5.25583   8
   1  -3   8 75.3230 5.37139  10
   1   3   8 79.1206 5.34034   2
  -1   3  -8 74.1861 5.06131   9
   1   3   8 95.4149 4.63300  11
   1   3   8 72.0798 4.94396   5
  -1  -3  -8 71.2964 5.01638   5
   1   3   8 72.2881 4.96728  15
  -1   3  -8 74.9671 5.03979   1
   1   3   8 82.6225 5.73319   4
  -1   3  -8 79.1518 5.15964   8
  -1   3  -9 25.6261 2.10853   1
   1  -3   9 19.7298 2.38255   4
   1  -3   9 30.5966 2.57957  10
   1   3   9 23.3246 1.97382  15
   1   3   9 20.3357 1.53596   8
  -1   3  -9 24.8599 2.04524  15
  -1  -3  -9 25.6935 1.88375   3
  -1   3  -9 23.6077 2.47052  10
   1  -3   9 23.7276 1.81421  16
   1   3   9 21.5489 2.36973   2
   1   3   9 26.8414 2.80065   4
  -1   3  -9 24.5694 2.11997   8
   1   3   9 25.2766 2.64410  10
  -1  -3  -9 24.7444 1.59656  13
  -1  -3  -9 22.7898 1.98754   5
  -1   3  -9 21.3862 2.03426   9
   1   3   9 23.0032 1.62005  13
   1  -3   9 21.5705 2.59215   7
  -1   3  -9 26.7394 1.93798  13
   1  -3   9 22.2692 2.18586   8
   1   3   9 24.3730 1.74625   3
   1   3   9 26.2228 1.96042   5
   1   3  10 66.9351 4.12712  13
  -1  -3 -10 64.5980 4.06272  13
   1  -3  10 64.5162 5.11853   7
  -1  -3 -10 56.8194 4.70602   2
  -1   3 -10 66.0638 4.50979   1
  -1   3 -10 72.9820 4.39276  13
  -1   3 -10 72.2962 4.89670   2
   1   3  10 63.3420 4.32190   5
   1  -3  10 63.0510 4.58408  15
   1  -3  10 64.9946 4.66664   8
   1  -3  10 65.2702 4.93858  10
   1   3  10 70.3417 5.12102  10
   1  -3  10 63.7284 4.23252  16
  -1   3 -10 65.1782 5.03400  10
   1   3  10 66.2292 4.83398   2
   1   3  10 77.7105 5.42834   4
  -1   3 -10 63.4000 4.49888  15
  -1   3 -10 70.5586 4.50678   9
   1   3  10 67.4077 4.49704  15
  -1   3 -10 71.8395 4.58204   8
  -1  -3 -10 73.3752 4.32457   3
   1  -3  10 65.9580 4.99011   4
  -1  -3 -10 62.6344 4.94166  10
   1   3  11 225.494 14.1172  10
   1   3  11 219.966 13.1064  13
  -1   3 -11 234.547 14.1292  10
  -1   3 -11 228.172 13.5220   1
   1  -3  11 220.467 13.2183  16
   1   3  11 232.212 13.8301   2
   1  -3  11 208.260 13.6055  15
  -1  -3 -11 218.992 14.0256  10
  -1   3 -11 233.150 13.3587  13
  -1   3 -11 219.237 13.4166   9
  -1   3 -11 235.392 13.4996   8
   1   3  11 195.322 13.4329  15
  -1  -3 -11 213.081 13.8106   2
   1   3  11 226.678 13.2991   5
   1  -3  11 211.995 13.6268   8
   1   3  11 233.974 14.3737   4
  -1  -3 -11 234.898 13.2518   3
  -1  -3 -11 214.046 13.0468  13
   1  -3  11 205.656 14.0822   7
   1  -3  11 231.195 14.0136  10
   1  -3  11 208.886 14.0011   4
  -1   3 -11 240.956 13.9830   2
  -1   3 -11 233.217 13.5417  15
  -1  -3 -12 4.09180 0.69405  13
   1  -3  12 3.90690 1.34842   8
  -1  -3 -12 6.97729 0.94595   3
  -1   3 -12 4.97706 1.27832  15
  -1   3 -12 6.47280 1.13429  13
   1   3  12 5.78898 1.12791   5
  -1   3 -12 4.25119 1.14153   9
   1   3  12 5.37400 0.83534  16
   1  -3  12 5.60014 1.90153  10
  -1   3 -12 5.33278 1.21791   8
  -1   3 -12 3.19003 1.68460  10
  -1  -3 -12 6.69624 1.78870  10
   1   3  12 5.68619 0.80448  13
   1   3  12 5.80997 1.83547   2
   1  -3  12 3.20476 1.79469   4
  -1   3 -12 2.63168 1.48947   2
   1   3  12 4.36692 1.94302  10
   1   3  12 5.07574 2.27674   4
   1  -3  12 5.75896 1.41236  15
   1  -3  12 5.98616 2.09337   7
   1   3  12 6.18920 1.32587  15
  -1   3 -12 2.68387 1.22227   1
  -1   3 -12 4.90201 0.94334  16
  -1  -3 -12 3.08872 1.57969   2
   1  -3  12 4.47393 0.96253  16
  -1  -3 -13 57.9118 4.78120  10
  -1   3 -13 50.5968 4.51753   2
   1   3  13 55.3133 3.64219  13
   1  -3  13 53.2226 3.72075  16
  -1   3 -13 56.9732 3.88522   9
  -1   3 -13 60.6003 4.93588  10
   1  -3  13 55.6366 4.76194  10
   1  -3  13 52.9161 4.86135   7
  -1  -3 -13 53.0854 3.67363   3
   1   3  13 60.7470 3.84691   5
   1  -3  13 57.1171 4.30004  15
   1   3  13 61.5228 5.07449  10
  -1   3 -13 57.0538 4.12249  15
   1   3  13 54.8339 4.43935   2
   1  -3  13 56.3499 4.89746   4
  -1  -3 -13 57.0189 4.55064   2
  -1   3 -13 51.2640 4.05104   1
   1   3  13 61.2918 3.64392  16
   1   3  13 62.9813 5.28021   4
  -1   3 -13 57.5494 3.97974   8
  -1  -3 -13 56.3253 3.57178  13
  -1   3 -13 55.1826 3.90399  13
  -1   3 -13 61.3713 3.81878  16
   1   3  13 49.6237 4.06414  15
   1  -3  13 55.9765 4.24774   8
   1  -3  14 13.5096 2.64092  10
   1   3  14 12.2722 1.31001  16
  -1  -3 -14 14.5148 1.26455  13
  -1   3 -14 14.5694 1.57615   9
   1  -3  14 9.19360 2.69545   4
   1   3  14 14.5304 2.39872   2
   1   3  14 14.1139 3.10310   4
  -1   3 -14 17.5296 1.59180  16
  -1   3 -14 13.5141 2.70514  10
  -1  -3 -14 15.1667 1.35868   3
   1  -3  14 14.3543 1.51809  16
  -1   3 -14 16.3680 1.86471   5
  -1   3 -14 13.9538 1.83328  15
   1  -3  14 16.4059 2.07093  15
  -1   3 -14 16.4558 1.79304  13
   1   3  14 16.4930 1.42882  13
   1   3  14 15.9359 1.96405  15
  -1  -3 -14 13.8460 2.51829  10
  -1   3 -14 12.5376 1.81579   1
   1   3  14 14.6909 2.96363  10
   1  -3  14 14.6867 2.00532   8
  -1   3 -14 12.8727 2.34556   2
  -1  -3 -14 19.5671 2.56639   2
  -1  -3 -14 13.8434 1.81342   5
   1  -3  14 10.8779 2.68616   7
  -1  -3 -15 46.3980 3.54153   5
   1   3  15 44.4668 3.53243   7
   1   3  15 49.8522 4.10296   2
   1   3  15 50.2575 4.71597  10
   1   3  15 43.5439 3.09185  13
   1  -3  15 43.4241 4.32680  10
  -1   3 -15 47.9206 3.23215  16
   1  -3  15 46.3471 3.80701  15
   1  -3  15 39.2525 3.10361  16
  -1   3 -15 61.4571 3.08547  11
  -1  -3 -15 45.4137 4.17971   2
  -1   3 -15 50.8340 3.52389   5
   1   3  15 42.7013 2.99326  16
  -1  -3 -15 42.5107 2.96170  13
  -1   3 -15 39.7812 4.33243  10
   1  -3  15 39.6761 4.21251   7
  -1   3 -15 40.1695 3.30067  13
  -1   3 -15 46.0443 3.19336   9
  -1   3 -15 42.5598 3.61123   1
  -1  -3 -15 43.6507 2.94783   3
  -1   3 -15 43.9952 4.14049   2
   1  -3  15 39.7373 4.38337   4
   1   3  15 34.0019 3.52872  15
   1  -3  15 43.4242 3.68766   8
  -1   3 -16 7.56752 1.53356  13
  -1   3 -16 5.58556 1.70347   1
  -1   3 -16 5.27840 1.21291  16
  -1   3 -16 7.23182 0.95732  11
  -1  -3 -16 9.80581 2.36891   2
  -1   3 -16 6.68665 2.38618   2
   1  -3  16 5.67444 1.24245  16
   1  -3  16 8.55817 2.68986   7
  -1  -3 -16 8.00500 1.06832  13
  -1   3 -16 6.22202 2.69092  10
   1   3  16 5.04757 1.16621  13
  -1  -3 -16 6.35695 1.57823   5
   1   3  16 7.09475 1.70917   7
  -1   3 -16 9.02647 1.64305   5
   1   3  16 7.78591 1.02675  16
   1  -3  16 7.40336 1.85839   8
   1  -3  16 3.42998 1.61037  15
   1   3  16 6.79590 1.78672  15
   1   3  17 60.8190 4.72894   7
  -1   3 -17 70.9617 4.80940   5
   1  -3  17 58.8830 5.05286  15
   1   3  17 59.5911 4.30555  13
   1  -3  17 63.5794 4.34187  16
  -1   3 -17 79.9221 4.93621   1
   1  -3  17 66.1144 5.82248   7
   1  -3  17 67.2443 4.85231   8
  -1   3 -17 56.8941 5.76530  10
   1   3  17 67.8776 4.17815  16
  -1  -3 -17 56.9490 5.41352   2
  -1  -3 -17 58.7861 4.69672   5
   1   3  17 66.1282 5.02892  15
  -1   3 -17 65.5002 5.61342   2
   1  -3  18 9.68361 3.54610   6
  -1   3 -18 10.0770 2.78849   2
   1  -3  18 5.85536 1.37498  16
  -1   3 -18 10.9514 1.89652   1
   1  -3  18 7.04311 2.02391  15
   1   3  18 5.89004 2.01327  15
  -1  -3 -18 6.94671 1.72407   5
   1  -3  18 6.82668 1.88064   8
   1  -3  18 6.69587 2.87827   7
   1   3  18 4.19317 1.78379   7
  -1   3 -18 7.97474 3.18914  10
  -1  -3 -19 29.4350 3.84964   2
   1   3  19 29.6957 3.33727  15
  -1   3 -19 29.2894 3.02345   5
  -1   3 -19 35.0987 4.17570   2
   1  -3  19 28.5995 3.42631  14
   1  -3  19 28.4317 3.29968  15
   1  -3  19 31.7234 4.27975   7
   1   3  19 26.9620 2.97998   7
  -1   3 -19 31.7369 4.43969  10
   1  -3  19 30.1250 4.78335   6
   1   3  20 11.7986 2.41588  15
  -1   3 -20 8.81038 2.10958   5
   1  -3  20 3.84416 2.81658   7
  -1   3 -20 9.97817 3.33927  10
  -1   3 -20 5.71325 3.09349   2
   1  -3  20 10.7683 3.96979   6
   1  -3  20 5.76805 2.25206  15
  -1  -3 -20 7.55461 2.82816   2
   1  -3  21 20.7375 4.53021   6
   1  -3  21 5.46159 2.35982  15
  -1   3 -21 12.0397 3.62246  10
   1  -3  21 21.6950 3.91872   7
  -1  -3 -21 17.2248 3.64520   2
   1  -3  21 11.5970 2.70383  14
  -1   3 -21 20.0124 3.47688   2
   1   3  21 8.99452 2.43185  15
  -1   3 -22 4.23478 3.43189  10
   1  -3  22 5.02741 2.39715  15
   1   3  22 6.69776 2.58867  15
  -1   3 -22 1.47320 3.22716   2
  -1  -3 -22 4.19538 3.01523   2
   1  -3  22 5.05830 2.51501  14
   1  -3  22 4.10426 3.18586   7
  -1  -3 -23 21.4763 4.10544   2
   1  -3  23 22.8874 3.46914  14
  -1  -4  23-1.08761 2.56695  14
   1  -4 -23 1.19476 2.89708   2
  -1  -4  23-1.08277 2.56969  15
  -1  -4  23 1.56275 3.18234   7
   1   4 -23-1.65139 3.72026  10
  -1  -4  22 0.66777 4.01956   6
   1   4 -22 1.04651 3.47275  10
   1   4 -22-0.48177 2.98874   2
  -1   4  22 1.44855 2.40473  14
  -1   4  22 4.77450 2.31703  15
  -1  -4  21 22.0493 3.05198  15
  -1   4  21 15.4888 2.59373  15
  -1  -4  21 14.1646 3.76628   7
  -1  -4  21 12.7502 4.82784   6
   1   4 -21 20.4076 4.12825  10
   1  -4 -21 17.5753 3.29502   2
  -1  -4  21 16.0115 2.64838   8
  -1   4  21 15.6503 1.95853  13
   1   4 -21 13.6670 3.52940   2
   1   4 -20 0.42879 2.91829   2
   1  -4 -20 1.36475 2.41904   2
  -1  -4  20 1.49246 1.94623  15
  -1   4  20 3.44553 2.04050  15
  -1   4  20 4.07595 1.29018  13
   1   4 -20 5.63315 3.36283  10
   1   4 -20 2.67443 1.78523   5
  -1   4  20 0.64311 2.04030  14
  -1  -4  20-1.87685 3.26879   7
  -1   4  20 0.93915 1.80003   7
  -1  -4  19 36.7110 3.61237   8
  -1  -4  19 37.9672 3.72429  15
   1   4 -19 33.2492 3.38205   1
  -1   4  19 35.6203 3.83603  14
  -1  -4  19 30.5292 4.45013   7
   1   4 -19 40.2672 3.28692   5
   1   4 -19 36.7542 4.35643   2
  -1   4  19 34.5297 3.43560  15
   1   4 -19 46.4321 4.85690  10
  -1   4  19 33.8412 2.78758  13
   1   4 -18 5.40093 2.86629  10
  -1  -4  18 5.92241 2.09406   8
  -1   4  18 6.69970 1.24208  13
  -1  -4  18 5.75313 1.97250  15
   1  -4 -18 4.81177 2.33107   2
  -1  -4  18 4.70929 2.66230   7
  -1   4  18 1.16128 1.63940  15
   1   4 -18 1.12161 2.31039   2
   1   4 -18 3.56274 1.51791   5
  -1  -4  18 2.53218 1.17594  16
  -1   4  18 2.54366 2.08792  14
   1   4 -18 2.06513 1.12928  16
   1   4 -18 3.68600 1.79952   1
   1   4 -17 13.0523 2.26458   1
  -1   4  17 11.5902 2.08216  15
   1  -4 -17 13.1934 2.84043  10
   1   4 -17 15.9951 1.97480   5
  -1   4  17 12.2169 1.49948  13
   1  -4 -17 9.07496 2.38925   2
   1   4 -17 13.3546 1.54945  16
   1   4 -17 14.1748 2.65267   2
  -1  -4  17 12.0051 2.21178  15
  -1  -4  17 10.4502 2.22561   8
  -1  -4  17 14.2432 3.10552   7
  -1   4  17 13.1357 1.16059  16
   1   4 -17 13.6833 3.12917  10
  -1   4  17 10.2725 2.20003  14
  -1   4  17 10.1919 2.39316   2
  -1  -4  17 10.7150 1.51254  16
  -1   4  16 9.79349 2.32210   2
   1  -4 -16 7.84529 2.58031  10
  -1   4  16 11.0039 1.04560  16
  -1  -4  16 11.4464 2.26306   8
  -1   4  16 11.5210 2.18901  14
  -1   4  16 9.55885 1.29294  13
  -1   4  16 6.94202 1.76401  15
   1   4 -16 6.76115 2.46591   2
   1   4 -16 6.57954 2.75688  10
   1  -4 -16 15.0774 2.47262   2
  -1  -4  16 12.2136 2.00989  15
   1   4 -16 8.29654 1.91303   1
  -1  -4  16 6.15162 2.53422   4
  -1  -4  16 13.9625 2.80140   7
   1   4 -16 13.4200 1.44520  16
  -1   4  16 8.50653 0.82354   8
  -1  -4  16 8.03332 1.37061  16
  -1  -4  15 32.8679 2.58784  16
  -1   4  15 30.0381 2.97368  15
   1   4 -15 37.5154 2.68808  16
   1  -4 -15 34.1719 3.69466  10
  -1   4  15 34.3367 2.28084   8
  -1   4  15 40.1487 3.50885   2
   1   4 -15 36.1540 3.02695  15
   1   4 -15 35.9051 2.90682   3
   1   4 -15 42.6366 3.85369   2
  -1  -4  15 36.6134 3.19377  15
   1   4 -15 39.5457 4.07651  10
  -1  -4  15 32.6475 4.05292   7
  -1   4  15 35.3138 2.57220  13
  -1   4  15 37.4255 2.37031  16
  -1   4  15 33.8047 3.86250  10
  -1   4  15 45.4245 3.93320  17
  -1  -4  15 35.6463 3.38178   8
   1  -4 -15 32.7107 3.37701   2
  -1  -4  15 28.6266 3.70074   4
   1   4 -15 33.0036 2.72724   9
  -1  -4  15 33.4732 3.70727  10
   1   4 -15 37.4136 3.24517   1
  -1   4  15 31.1480 2.33286   8
  -1   4  15 38.2426 4.42741   4
   1   4 -15 35.9131 2.89804  13
  -1   4  14 6.97945 0.97978   8
  -1   4  14 7.82941 1.08046  13
  -1  -4  14 5.18978 2.17517  10
  -1   4  14 3.95070 2.26541  10
   1   4 -14 8.26354 1.41532   9
  -1  -4  14 9.66340 1.58866  15
   1   4 -14 6.75178 1.12529  16
  -1   4  14 12.4416 2.45141  17
   1   4 -14 9.29285 1.39213  13
  -1   4  14 9.62213 1.21672   5
  -1   4  14 8.54470 1.53849  15
  -1   4  14 8.33298 0.91191  16
   1  -4 -14 2.62982 1.83849  10
  -1  -4  14 7.47575 1.81918   8
   1   4 -14 7.24064 1.70315   1
  -1   4  14 7.88161 2.61576   4
   1   4 -14 4.45902 2.09164  10
   1   4 -14 6.71200 1.48085   3
   1   4 -14 5.17549 1.89278   2
   1   4 -14 7.53577 1.47328  15
  -1  -4  14 9.40468 2.54532   7
  -1  -4  14 7.62941 2.36925   4
  -1  -4  14 7.77791 1.16226  16
   1  -4 -14 6.34320 1.96283   2
  -1   4  14 8.37151 2.04073   2
  -1   4  13 58.9670 3.92004  13
  -1  -4  13 57.6196 3.95992  16
  -1   4  13 62.7546 4.92919  17
   1  -4 -13 63.8970 4.68023   2
  -1   4  13 55.5749 4.27913  15
  -1  -4  13 55.4703 4.38287  15
   1   4 -13 67.9325 4.41704   8
  -1   4  13 61.9830 5.16078  10
   1   4 -13 67.3673 4.31828   9
  -1   4  13 62.0290 3.98524   5
  -1   4  13 59.1381 3.88032   8
   1   4 -13 58.7276 4.00441  16
  -1   4  13 68.1193 5.48465   4
   1   4 -13 64.2953 5.15411  10
   1   4 -13 65.3378 4.53402   1
   1   4 -13 62.6413 4.19445  13
   1  -4 -13 58.8794 4.85479  10
  -1  -4  13 52.3788 4.57417   8
   1   4 -13 63.2262 4.91016   2
   1   4 -13 55.8623 4.23809   3
  -1  -4  13 59.6011 5.18934   7
  -1  -4  13 51.0667 4.82532  10
   1   4 -13 67.5947 4.36715  15
  -1   4  13 66.3065 4.64659   2
  -1  -4  13 55.5363 4.91095   4
   1   4 -12 16.9068 1.42833  16
   1  -4 -12 15.5133 2.21712  10
  -1   4  12 12.7515 0.88038  12
  -1  -4  12 6.40114 1.90554   4
  -1  -4  12 12.3510 2.17699  10
  -1   4  12 11.0774 1.24947   8
   1   4 -12 11.1684 2.30473  10
   1   4 -12 11.1820 1.62211   3
  -1   4  12 12.0657 1.59396  15
  -1   4  12 14.6098 1.13058   3
  -1   4  12 12.1468 2.61251   4
  -1  -4  12 12.5829 1.70555  15
   1   4 -12 12.5428 1.64827   9
  -1  -4  12 10.3390 1.90624   8
  -1   4  12 14.1021 1.34908   5
  -1   4  12 14.3115 1.25489  13
  -1   4  12 16.8187 2.26373  17
  -1   4  12 17.4327 2.15746   2
   1   4 -12 12.3911 1.66182   8
  -1  -4  12 14.4703 1.37537  16
   1   4 -12 11.6609 1.50649  13
  -1   4  12 17.7361 2.54637  10
   1   4 -12 14.9993 1.70774  15
   1   4 -12 11.3816 2.01117   2
  -1   4  12 12.1300 0.89961   9
  -1  -4  12 10.5235 2.28060   7
   1  -4 -12 12.4537 1.94663   2
   1   4 -12 15.4832 1.97168   1
   1   4 -11 11.5628 1.61873   1
  -1   4  11 7.90365 1.30021  15
  -1   4  11 10.2096 1.04711  13
  -1   4  11 12.3379 1.04881   3
  -1  -4  11 8.42787 1.33136  15
  -1  -4  11 10.3519 1.22792  16
  -1   4  11 11.3332 0.94695   9
  -1   4  11 11.9266 1.21622   8
   1   4 -11 9.48035 2.04041  10
  -1   4  11 10.7850 2.10380  10
  -1  -4  11 10.6982 2.08971  10
  -1   4  11 12.6649 1.24042   5
  -1   4  11 10.3837 1.75951   2
   1   4 -11 11.2551 1.38576  13
   1   4 -11 10.2734 2.10380   4
  -1  -4  11 10.1322 1.90586   8
   1   4 -11 10.6232 1.57777   9
   1  -4 -11 11.5280 1.32443   5
   1   4 -11 11.9612 1.58542   8
   1  -4 -11 8.30816 1.75512  10
   1   4 -11 8.12709 1.76365   2
  -1   4  11 11.1019 2.21125   4
   1   4 -11 11.9804 1.22734  16
  -1  -4  11 8.93334 1.96395   4
  -1   4  11 9.83517 1.90653  17
   1   4 -11 8.83654 1.36417  15
   1   4 -11 11.6382 1.57170   3
   1   4 -10 21.0712 2.19984   9
  -1   4  10 24.1192 1.77260   3
   1   4 -10 26.2630 2.02838  13
  -1  -4  10 14.2695 2.34352   4
  -1   4  10 24.1233 2.01973  15
   1  -4 -10 24.1849 1.98951   5
  -1   4  10 21.2247 1.71531   9
   1   4 -10 24.9677 2.26914   3
   1   4 -10 24.3833 2.76034  10
   1   4 -10 22.4494 2.00633  15
  -1   4  10 27.5458 1.97221   7
  -1  -4  10 25.7515 2.19497   9
  -1   4  10 26.8045 2.75943  10
  -1   4  10 19.5139 2.34774   2
   1   4 -10 25.6176 2.27321   1
  -1   4  10 25.2905 1.73659  13
  -1   4  10 23.1159 2.74201   4
  -1   4  10 21.4942 1.83611   8
  -1  -4  10 24.4503 2.67329  10
   1   4 -10 27.7030 2.82228   4
   1   4 -10 21.6976 2.43203   2
  -1  -4  10 23.8435 1.86796  16
  -1   4  10 30.1717 2.14159   6
   1   4 -10 23.4058 2.18280   8
  -1  -4  10 22.0146 2.45249   8
  -1   4  10 25.8472 1.93404   5
  -1   4  10 21.6038 2.46960  17
  -1  -4   9 68.3152 5.14213   4
  -1   4   9 72.1448 4.67383   5
   1  -4  -9 71.2306 4.73341   5
  -1  -4   9 73.0566 4.89948   9
   1   4  -9 74.7837 4.76807  15
  -1   4   9 73.3687 5.04338   2
  -1   4   9 71.2826 5.28949  10
  -1   4   9 66.8552 4.62617   8
  -1  -4   9 69.4321 4.59426  16
  -1   4   9 79.0277 5.21824  17
  -1   4   9 71.9221 5.45530   4
   1   4  -9 63.1653 4.90576   1
  -1   4   9 75.9990 4.50950  13
  -1   4   9 66.8619 4.56482   9
  -1   4   9 73.8596 4.67562   7
   1   4  -9 84.5131 5.23897   2
   1   4  -9 71.6162 4.86763   3
  -1  -4   9 75.8481 5.27707  10
  -1   4   9 84.5075 4.84180   6
   1   4  -9 78.1490 4.74096  13
  -1   4   9 78.1161 4.40194  11
   1   4  -9 68.4182 4.94622   8
  -1  -4   9 61.4419 5.06770   8
  -1   4   9 67.9500 4.71647  15
   1   4  -9 76.3940 5.35983  10
   1   4  -9 76.8962 5.30897   4
  -1   4   9 73.7741 4.62686   3
   1   4  -9 75.3766 4.94852   9
  -1  -4   8 65.8091 4.52563   4
  -1  -4   8 64.2528 4.37641   9
   1   4  -8 64.5573 4.66979   4
   1   4  -8 62.7608 4.38468   1
   1   4  -8 61.0899 4.64277  10
  -1   4   8 59.4192 4.05826   9
   1   4  -8 67.0193 4.17385  15
  -1  -4   8 55.1335 4.53637   8
  -1   4   8 64.0595 4.68055  10
  -1   4   8 58.0555 3.78566   1
  -1   4   8 67.2609 4.44068   2
  -1   4   8 61.2429 3.91952  13
  -1  -4   8 57.0943 4.00958  16
  -1  -4   8 64.2323 4.61646  10
  -1   4   8 69.4103 4.56413  17
   1   4  -8 60.7750 4.36345   9
   1  -4  -8 64.8518 4.16067   5
  -1   4   8 65.1788 4.11661   3
   1   4  -8 67.0926 4.17981  13
  -1   4   8 64.1587 4.12844   7
  -1   4   8 67.3380 4.15098   5
   1   4  -8 64.5210 4.32739   3
  -1   4   8 67.5181 4.20282   6
   1   4  -8 60.2088 4.38611   8
  -1   4   8 61.7640 4.12449  15
  -1   4   8 73.6553 4.87627   4
  -1   4   8 60.9727 4.11772   8
  -1   4   8 73.9404 3.90905  11
   1   4  -7 88.6302 5.41011  15
  -1  -4   7 82.1159 5.47153  15
   1   4  -7 85.9881 5.64458   1
  -1   4   7 83.0235 5.65658   2
   1   4  -7 92.8160 5.46163  13
  -1   4   7 82.6749 5.39314   9
  -1   4   7 81.1827 5.41408   7
  -1   4   7 88.1617 5.46222   5
   1   4  -7 82.6369 5.65110   9
  -1   4   7 88.8124 5.48711   6
   1   4  -7 91.7385 5.71761   8
  -1   4   7 84.9595 5.69631  17
  -1   4   7 75.8928 5.39478   8
  -1  -4   7 82.0986 5.32615  16
  -1  -4   7 91.3466 5.69555   9
   1  -4  -7 90.1630 5.66444   2
  -1   4   7 75.6069 5.14163   1
  -1  -4   7 90.6491 5.87062  10
  -1  -4   7 80.9170 5.65537   4
   1   4  -7 92.3770 5.83875   4
   1   4  -7 92.2869 5.63422   3
  -1   4   7 85.2727 5.44946   3
  -1   4   7 89.2282 5.92628   4
   1   4  -7 82.6744 5.83695  10
  -1   4   7 81.2958 5.21326  13
  -1   4   7 93.5325 5.83354  10
  -1   4   7 77.4215 5.35856  15
   1   4  -6 24.5985 2.10663   8
  -1   4   6 22.4896 1.83914   8
  -1   4   6 26.3706 2.22789   4
  -1   4   6 21.7728 1.80108   3
   1   4  -6 23.7784 2.01209   3
  -1   4   6 23.8785 1.88566   7
  -1  -4   6 23.5278 2.05506   9
  -1  -4   6 20.9985 2.10823  10
  -1  -4   6 24.1762 1.78062  15
  -1   4   6 19.9431 2.06411  10
  -1   4   6 21.2637 1.81266   9
  -1   4   6 24.0041 2.06004  17
   1   4  -6 22.2148 2.07109   4
  -1   4   6 28.3896 1.63877  11
  -1   4   6 22.0853 1.67825  15
   1   4  -6 23.9303 1.71972  15
   1   4  -6 22.6607 1.99733   1
  -1   4   6 20.5176 1.52588   1
  -1   4   6 21.1811 1.84888   6
  -1   4   6 21.8292 1.56504  13
  -1   4   6 21.9741 1.97436   2
   1   4  -6 22.2257 1.78578  13
  -1   4   6 21.8375 1.83289   5
  -1  -4   6 17.8788 1.94080   4
   1   4  -6 22.1019 2.12889  10
   1   4  -6 22.7422 2.09296   9
  -1  -4   5 318.323 18.1621   6
  -1   4   5 281.185 17.5296   7
  -1   4   5 293.485 17.5182   9
  -1   4   5 282.467 17.5406   6
   1   4  -5 271.511 17.6117   1
  -1  -4   5 306.063 17.4561  15
  -1   4   5 286.581 17.2887   1
   1   4  -5 338.464 18.0384   7
   1   4  -5 280.683 17.6813   9
   1   4  -5 287.081 17.6229   3
  -1   4   5 294.364 17.5196   3
   1   4  -5 301.258 17.6067   4
  -1   4   5 317.949 17.6658  10
   1   4  -5 295.382 17.7388  10
   1   4  -5 291.522 17.3673  15
  -1   4   5 312.290 17.7680   4
  -1  -4   5 306.166 17.5454   4
  -1   4   5 301.345 17.5223   5
   1   4  -5 309.351 17.7490   8
  -1   4   5 312.203 17.6260   2
  -1   4   5 292.030 17.6423  17
  -1   4   5 280.609 17.5207   8
  -1   4   4 68.4147 4.31702  10
  -1   4   4 66.5572 4.31940   2
  -1   4   4 65.1072 4.31466   6
  -1   4   4 69.3601 4.37253  17
   1   4  -4 63.9336 4.42623   8
   1   4  -4 66.9508 4.32470   1
  -1   4   4 65.0065 4.10216  14
  -1   4   4 68.6241 4.30062   9
  -1   4   4 64.4976 4.34756   4
  -1   4   4 63.5272 4.30171   8
   1   4  -4 62.5025 4.42702   9
  -1  -4   4 72.7940 4.83669   6
   1   4  -4 59.0902 4.59636   7
   1   4  -4 62.0840 4.36717   3
   1   4  -4 67.3507 4.47116  10
  -1  -4   4 66.2966 4.19705   4
   1  -4  -4 73.6529 4.23399   6
  -1   4   4 67.1510 4.22625   5
  -1   4   4 62.8820 4.31686   7
   1   4  -4 53.3234 4.21648   4
   1  -4  -4 71.9164 4.26033   7
  -1   4   4 67.9910 4.04970  16
  -1   4   4 65.7958 4.03903   1
  -1   4   4 59.7615 4.24105   3
  -1  -4   4 65.3205 4.11466  15
   1   4  -4 64.8529 4.04643  15
  -1  -4   3 33.9341 2.49829   4
  -1   4   3 36.5608 2.67324   3
   1  -4  -3 45.2829 2.73339   7
  -1   4   3 36.6286 2.44322   1
   1   4  -3 33.0708 2.65707   1
  -1   4   3 29.8635 2.41647  14
  -1   4   3 37.3560 2.71609   9
  -1   4   3 37.2602 2.71007  17
  -1   4   3 31.7562 2.73042   7
  -1   4   3 53.7854 2.83337  10
   1   4  -3 41.4111 2.83542   8
  -1  -4   3 38.8210 2.44389  15
   1   4  -3 38.4016 2.52999   4
   1  -4  -3 38.8950 2.74049   8
   1   4  -3 37.2343 2.39226  15
   1   4  -3 42.2488 2.80217  10
  -1   4   3 38.4332 2.43171  16
  -1   4   3 42.6822 2.66331   5
  -1   4   3 39.7343 2.76055   8
   1   4  -3 35.1476 2.78568   9
  -1  -4   3 41.3178 2.48099  16
  -1  -4   3 36.4924 3.07579   6
  -1   4   3 35.8452 2.61562   4
   1  -4  -3 39.1574 2.67118   6
   1  -4  -3 34.2375 2.55919  17
  -1   4   3 36.1327 2.72083   6
   1   4  -3 34.3701 2.73300   3
  -1  -4   3 35.2321 2.42802  14
  -1   4   2 149.421 9.52330  17
   1  -4  -2 134.720 9.38811  17
  -1  -4   2 165.918 9.23059  15
   1   4  -2 153.134 9.26904   4
  -1   4   2 153.283 9.60998   6
  -1   4   2 156.799 9.31505   1
   1   4  -2 149.823 9.60965   8
  -1  -4   2 146.504 9.80258   7
  -1  -4   2 158.610 9.25463  14
  -1  -4   2 167.348 9.81771   6
   1   4  -2 148.241 9.60494   9
   1  -4  -2 163.635 9.62321   8
  -1  -4   2 146.382 9.36318  17
   1   4  -2 156.963 9.18251  15
   1   4  -2 170.061 9.59336   3
   1   4  -2 141.909 9.44868   1
  -1   4   2 161.291 9.30814   4
   1  -4  -2 164.843 9.62098   7
   1  -4  -2 175.132 9.60474   6
  -1   4   2 159.107 9.65174   7
  -1   4   2 157.949 9.21008  14
  -1  -4   1 58.0788 4.18328   6
   1   4  -1 68.7243 4.28644   6
  -1  -4   1 63.6796 3.77574  14
   1  -4  -1 60.2923 4.20678   7
  -1   4   1 62.3874 3.65578  14
   1   4  -1 56.4307 4.11195   9
   1  -4  -1 67.0660 4.20295   8
   1   4  -1 62.1288 3.75888  14
  -1  -4   1 64.3495 3.93557   1
   1   4  -1 58.1722 3.65688  15
   1   4  -1 64.2047 4.12999   3
   1  -4  -1 59.4970 4.16920   6
  -1   4   1 63.2539 4.24760   6
  -1   4   1 57.3005 4.08345  17
   1   4  -1 60.0086 3.77915   4
  -1  -4   1 61.3982 4.31800   7
   1  -4  -1 63.2504 3.95302  17
  -1  -4   1 60.4210 3.72409  17
  -1  -4   0 182.985 10.1681   7
   1   4   0 147.262 9.92463   3
   1   4   0 155.718 9.95685   6
  -1   4   0 146.513 9.93935   9
   1  -4   0 173.870 9.70887  16
  -1   4   0 180.603 10.2294   6
   1   4   0 159.475 9.54622  15
   1   4   0 158.076 9.66913  14
  -1  -4   0 164.926 9.68320  14
   1  -4   0 157.406 9.89949  17
  -1  -4   0 179.771 10.0140   6
  -1  -4   0 176.832 9.80041   1
  -1   4   0 156.275 9.69584  15
   1  -4   0 170.019 10.1911   6
   1   4   0 165.748 10.0818   7
   1  -4   0 170.611 10.1879   7
  -1  -4   0 168.830 10.0815   8
   1  -4   1 133.737 8.80899   6
  -1  -4  -1 144.183 8.30687  14
  -1  -4  -1 146.567 8.65461   8
   1   4   1 146.971 8.27216  17
   1   4   1 135.498 8.59881   7
   1   4   1 138.738 8.49073   6
  -1   4  -1 140.876 8.30844  15
  -1   4  -1 138.601 8.32927  10
  -1  -4  -1 157.033 8.61654   3
   1   4   1 128.677 8.38801   1
   1   4   1 141.308 8.29496  14
  -1  -4  -1 138.648 8.59654   9
   1  -4   1 147.487 8.63080  17
  -1  -4  -1 120.113 8.43721   6
  -1  -4  -1 148.431 8.34852   1
   1  -4   1 133.340 8.29038  16
  -1   4  -1 119.012 8.58544   8
  -1   4  -1 125.051 8.53952   9
  -1  -4  -1 151.423 8.65062   7
   1  -4   2 54.5721 4.06760   6
  -1   4  -2 48.1259 3.52165   1
   1   4   2 50.8570 3.64782   8
  -1  -4  -2 47.3103 3.64624   9
   1   4   2 48.5088 3.55857   6
   1   4   2 52.6996 3.67700   7
   1   4   2 54.2631 3.45497  14
  -1   4  -2 51.4501 3.98187   7
  -1  -4  -2 56.9952 3.46028  14
  -1   4  -2 52.4478 3.43938  15
  -1   4  -2 53.6856 3.80425   8
   1   4   2 55.4863 3.43262  17
   1  -4   2 51.4931 3.85946  17
   1   4   2 52.5213 3.25220  15
  -1  -4  -2 55.3885 3.46020   6
  -1   4  -2 55.0751 3.73249   9
   1  -4   2 59.1761 3.43823  16
  -1  -4  -2 57.9896 3.65724   7
  -1  -4  -2 56.4658 3.69474   3
   1   4   2 50.8207 3.65468   9
  -1  -4  -2 61.9296 3.45317   1
   1   4   2 51.6939 3.46853   1
  -1  -4  -2 60.2116 3.75747   8
  -1   4  -2 54.1944 3.49997  10
  -1   4  -3 118.711 7.90780   8
   1  -4   3 117.036 7.49715   4
   1   4   3 119.977 7.70037   8
  -1   4  -3 136.042 7.59851  15
  -1   4  -3 125.271 7.84937   9
   1  -4   3 120.479 7.53527  16
   1  -4   3 131.665 7.65631  15
  -1  -4  -3 130.141 7.65871   7
   1   4   3 124.402 7.59943  17
   1   4   3 119.895 7.70500   7
  -1   4  -3 126.152 7.67907   1
  -1   4  -3 139.261 8.17304   7
  -1  -4  -3 147.617 7.53121   1
  -1   4  -3 128.140 7.68664  10
   1   4   3 115.638 7.72420   5
   1   4   3 126.356 7.73815   9
   1   4   3 124.354 7.88524   2
  -1  -4  -3 122.248 7.51650   6
  -1  -4  -3 133.696 7.81381   3
   1   4   3 123.098 7.63752   6
   1   4   3 120.507 7.60989  14
  -1  -4  -3 124.941 7.76316   9
   1  -4   3 134.999 8.30162   6
   1   4   3 113.347 7.56758   1
   1   4   3 127.049 7.78337   3
   1   4   3 119.848 7.41880  15
  -1  -4  -3 140.319 7.80810   8
   1   4   4 9.40422 1.11840   6
   1   4   4 16.7155 1.66766   2
  -1  -4  -4 12.4453 1.26631   8
   1   4   4 10.7365 1.17686  14
   1   4   4 10.7720 1.03145   1
   1   4   4 11.4418 0.93412  15
  -1  -4  -4 11.8685 1.29152   9
  -1   4  -4 13.1833 1.16518  15
   1   4   4 10.5768 1.20357   9
   1   4   4 12.4969 1.34456   3
   1  -4   4 11.2826 1.18679  15
   1   4   4 13.8403 1.56338   4
  -1  -4  -4 9.05613 1.27607   3
  -1   4  -4 12.3896 1.28184   1
  -1   4  -4 11.4771 1.45072   9
  -1   4  -4 11.4992 1.30034  10
   1  -4   4 10.2313 1.06056  16
  -1  -4  -4 12.0431 1.29813   5
   1   4   4 11.5509 1.21929  17
   1  -4   4 10.0952 1.31234  10
  -1   4  -4 11.6719 1.55665   8
   1   4   4 14.4786 1.26892   8
  -1   4  -4 7.83693 1.68401   7
   1   4   4 11.9213 1.24722   7
   1  -4   4 10.4873 1.15044   4
   1   4   4 9.06710 1.35871   5
  -1  -4  -4 12.3732 1.08527   7
   1   4   4 11.3398 1.49103  10
   1   4   5 72.5038 4.43541  15
  -1  -4  -5 69.4628 4.69131   3
   1   4   5 81.9857 4.71339  17
  -1   4  -5 64.3442 4.77596   9
  -1   4  -5 70.2296 4.86724   8
  -1  -4  -5 68.8438 4.60144   9
  -1   4  -5 70.5633 5.11560   7
   1  -4   5 71.7361 4.66414   4
   1   4   5 64.4772 4.53501   8
   1   4   5 67.6334 4.50779   6
   1   4   5 69.6075 4.56707   9
   1   4   5 72.8472 4.39595   1
   1   4   5 75.1814 4.31119  13
  -1  -4  -5 68.2540 4.64882   5
   1   4   5 77.2661 4.96094  10
   1   4   5 65.8178 4.60599  14
   1   4   5 72.7669 4.88021   2
   1   4   5 66.4465 4.90205   4
  -1   4  -5 78.1030 4.69872   1
   1   4   5 66.5032 4.53854   7
   1  -4   5 70.0488 4.76008  10
  -1   4  -5 77.7303 4.59781  15
  -1  -4  -5 74.9511 4.57723   8
   1   4   5 74.7237 4.71738   5
   1  -4   5 68.6889 4.64561  15
   1   4   5 75.4281 4.69562   3
  -1   4  -5 74.0549 4.80254  10
   1   4   6 67.3061 4.12951   6
   1   4   6 63.0222 3.95237   1
   1   4   6 66.4743 3.91801  13
  -1  -4  -6 65.7578 4.29472   3
  -1  -4  -6 67.7762 4.20700   9
   1  -4   6 61.3554 4.44392  10
   1   4   6 60.0355 4.28523  14
  -1   4  -6 64.3192 4.51528   8
   1   4   6 63.1912 4.26574   3
   1   4   6 73.9020 4.42361  17
  -1   4  -6 69.5282 4.23846  15
   1   4   6 64.8810 4.52899   2
  -1   4  -6 64.5510 4.24377  13
  -1   4  -6 66.7494 4.44193   9
  -1   4  -6 69.9839 4.54593  10
  -1  -4  -6 65.0171 4.31822   5
  -1   4  -6 73.0899 4.88112   7
   1   4   6 68.9949 4.33955   5
   1  -4   6 62.8426 4.38938   4
   1   4   6 72.0031 4.66725  10
   1   4   6 64.7880 4.15506   7
  -1   4  -6 59.4380 4.27982   1
   1   4   6 65.8632 4.73755   4
   1   4   6 59.9737 4.13151   9
   1   4   6 56.6644 4.11289   8
   1   4   6 62.5510 4.09904  15
   1   4   7 49.5192 3.36722   9
   1   4   7 49.8345 3.83942   2
  -1   4  -7 50.5966 3.79799   8
   1  -4   7 52.4151 3.82586  10
   1   4   7 54.0815 3.40392   6
   1   4   7 52.8538 3.18419  13
   1  -4   7 46.3955 3.37009  16
   1  -4   7 45.6181 3.85598   8
   1   4   7 66.1104 3.86895  17
   1   4   7 60.6471 4.10295  10
   1  -4   7 50.7347 3.78708   4
   1   4   7 51.7798 3.49120   3
   1   4   7 45.8574 3.36458   7
  -1   4  -7 51.8237 3.63148   1
   1   4   7 60.5730 3.63286   5
  -1   4  -7 49.1219 3.72669   9
   1   4   7 59.3705 4.20606   4
  -1  -4  -7 58.2419 3.43422   9
  -1   4  -7 53.9721 3.55510  15
   1   4   7 47.3038 3.59501  14
  -1   4  -7 51.7559 3.85115  10
  -1   4  -7 48.2609 3.49280  13
   1   4   7 52.9007 3.13440   1
   1   4   7 43.0748 3.32712   8
  -1  -4  -7 55.6458 3.58488   3
   1   4   7 53.0976 3.43145  15
  -1   4  -7 56.2103 4.21396   7
   1   4   8 165.391 10.3010   7
   1   4   8 186.532 10.5416   5
   1  -4   8 165.064 10.7632   4
  -1   4  -8 162.701 10.6331   9
   1   4   8 180.783 11.1778   4
   1   4   8 160.403 10.5986  14
  -1   4  -8 181.174 10.5455  15
  -1   4  -8 168.648 10.8715  10
   1   4   8 189.002 10.4130   6
   1   4   8 169.535 10.3996   3
   1   4   8 210.581 10.1767  11
  -1   4  -8 180.025 10.4773  13
  -1   4  -8 185.264 10.7912   8
   1  -4   8 159.673 10.8078   8
   1  -4   8 156.861 10.3087  16
  -1  -4  -8 177.021 10.4955   3
   1   4   8 154.144 10.2522   8
   1   4   8 188.549 11.0655  10
  -1   4  -8 160.249 10.5609   1
   1   4   8 156.849 10.3962  15
   1   4   8 180.428 10.8819   2
   1   4   8 183.769 10.7784  17
   1   4   8 164.387 10.1533  13
   1   4   8 167.202 10.2609   9
   1  -4   8 155.274 10.7676  10
  -1   4  -9 101.309 7.21640   9
   1   4   9 111.557 7.27813  14
   1  -4   9 108.774 8.08470   6
   1  -4   9 112.151 7.47179   8
   1   4   9 125.568 7.93193   4
   1   4   9 125.128 7.46769  17
   1   4   9 112.206 6.76646   9
  -1   4  -9 110.354 7.21675   1
  -1   4  -9 99.3635 7.42189   2
   1   4   9 111.791 6.86168   7
  -1   4  -9 116.641 7.31188   8
  -1   4  -9 113.099 6.94877  16
   1   4   9 111.002 7.45963   2
   1   4   9 114.407 7.68414  10
  -1  -4  -9 103.586 7.00150   3
  -1   4  -9 114.791 7.14218  15
   1  -4   9 104.855 6.89147  16
   1   4   9 108.436 6.92390   3
   1   4   9 113.926 6.73926  13
  -1   4  -9 118.535 7.05670  13
   1  -4   9 114.705 7.51924  10
   1   4   9 118.645 7.08701   5
   1   4   9 102.607 7.01857  15
   1   4   9 135.549 6.73334  11
  -1   4  -9 103.130 7.48740  10
   1  -4   9 111.116 7.51569   4
   1  -4   9 112.271 7.26360  15
   1   4   9 101.922 6.77601   8
  -1   4 -10 62.5727 4.27425   8
   1   4  10 56.5649 3.64776  13
   1   4  10 60.7812 4.50155   2
   1   4  10 48.6544 4.15911  14
  -1   4 -10 64.8801 4.02666  13
   1  -4  10 56.5691 3.84064  16
  -1   4 -10 57.8049 4.17190   1
   1  -4  10 75.5419 5.37348   6
   1   4  10 62.9378 4.75262  10
  -1   4 -10 63.0689 4.53362   2
  -1   4 -10 53.1956 4.58669  10
   1   4  10 58.3230 3.99245   5
   1   4  10 52.7591 3.62041   8
   1  -4  10 53.1676 4.16102  15
   1  -4  10 57.3513 4.49349  10
  -1   4 -10 62.3493 4.11755  15
  -1  -4 -10 54.9665 4.40359   2
  -1   4 -10 54.9786 4.16782   9
   1   4  10 65.7157 5.00165   4
   1   4  10 61.2247 3.81408   3
   1   4  10 57.8518 4.00922  15
   1  -4  10 59.7279 4.61722   4
  -1   4 -10 61.4776 3.90272  16
   1  -4  10 58.4545 4.42744   8
   1   4  10 56.7544 3.60048   9
   1   4  10 61.2242 3.49894  11
   1   4  10 61.6065 3.78578   7
   1  -4  10 63.8836 5.03265   7
  -1  -4 -10 56.4173 3.91731   3
   1   4  11 76.7339 4.83009  13
  -1  -4 -11 77.3572 5.05685   3
   1   4  11 80.2227 6.16517   4
   1   4  11 71.8152 5.20154  15
  -1   4 -11 93.9828 5.46567   8
   1   4  11 85.2909 6.06395  10
   1  -4  11 72.2003 6.36561   6
  -1   4 -11 77.8807 5.74424   2
   1   4  11 70.9755 4.69909   8
   1   4  11 72.6464 5.44353  14
  -1   4 -11 84.0478 5.39062   9
   1  -4  11 85.5694 6.22258   7
   1  -4  11 77.2941 5.45615  15
   1   4  11 92.7456 5.79132  17
   1  -4  11 74.7605 5.54095   8
   1   4  11 84.0504 4.96896   3
   1  -4  11 77.5434 5.02063  16
   1   4  11 79.0986 5.16024   5
  -1   4 -11 78.6794 5.36659   1
   1  -4  11 86.9610 5.91906   4
   1  -4  11 77.4046 5.75965  10
  -1   4 -11 86.5243 5.96542  10
  -1   4 -11 87.1678 5.19476  13
  -1   4 -11 76.8615 5.26682  15
   1   4  11 83.5931 4.95531   7
  -1   4 -11 79.3964 5.04081  16
  -1  -4 -11 76.7990 5.60079   2
   1   4  11 75.3296 5.67162   2
   1   4  12 94.0429 6.06284  17
   1   4  12 81.0670 6.43971   4
   1   4  12 69.2581 5.58394  14
   1   4  12 86.4250 5.29741   5
   1  -4  12 87.5132 6.12821   4
   1  -4  12 74.9569 6.31768   7
  -1   4 -12 81.0505 5.51369   8
  -1  -4 -12 85.8826 5.21718   3
  -1   4 -12 80.6691 5.61559   1
   1   4  12 85.8835 6.31215  10
  -1  -4 -12 85.4774 5.88271   2
   1   4  12 78.4864 5.00602  13
  -1   4 -12 86.8038 5.36869  13
  -1   4 -12 78.8620 5.46853   9
  -1   4 -12 84.3111 5.23288  16
   1  -4  12 76.0698 6.59062   6
  -1   4 -12 76.1890 6.11602  10
   1  -4  12 73.6956 5.70675   8
   1  -4  12 79.6095 5.66537  15
   1   4  12 78.4619 5.08950   7
   1  -4  12 79.3118 5.17622  16
   1  -4  12 75.0149 5.95767  10
   1   4  12 91.1447 6.00357   2
   1   4  12 77.0220 5.42992  15
  -1   4 -12 86.9048 5.56272  15
  -1   4 -12 77.4273 5.94040   2
  -1  -4 -13 12.1916 2.15158   2
  -1   4 -13 16.2073 1.91018   1
   1   4  13 10.1743 2.24249   2
   1  -4  13 15.1948 2.11476   8
   1  -4  13 10.1527 2.89167   6
   1  -4  13 15.8205 2.72636   4
   1  -4  13 11.6232 1.90896  15
  -1   4 -13 11.6971 1.69137  15
  -1  -4 -13 14.6151 1.46006   3
   1   4  13 13.2238 1.60507   5
  -1   4 -13 12.6138 1.71382   8
  -1   4 -13 13.5926 1.49247  16
  -1   4 -13 11.5281 1.63559  13
   1   4  13 15.2515 2.76318  10
  -1   4 -13 15.5264 1.86141   9
   1   4  13 12.5643 1.31201   7
  -1   4 -13 11.5014 2.50094  10
   1  -4  13 13.0306 1.46592  16
   1   4  13 12.3911 1.78684  15
   1   4  13 8.69738 1.89596  14
   1  -4  13 12.2153 2.57200   7
   1   4  13 11.1270 2.33600  17
   1  -4  13 16.6106 2.67276  10
   1   4  13 17.6754 3.19262   4
   1   4  13 14.3911 1.25514  13
  -1   4 -13 20.1689 2.52580   2
   1  -4  14 70.3436 5.09674  15
   1   4  14 54.7321 4.70722  15
  -1   4 -14 72.4926 4.69375  13
   1   4  14 68.6932 4.28996  13
  -1   4 -14 74.5261 4.81791   8
   1   4  14 70.2816 5.40318  17
   1   4  14 66.8973 5.28098   2
  -1   4 -14 67.0544 4.48392  16
   1  -4  14 65.2887 4.45448  16
   1  -4  14 68.5017 5.62268   4
   1   4  14 64.7765 5.74040  10
   1  -4  14 71.3036 5.12939   8
   1   4  14 59.9909 5.00223  14
   1   4  14 69.5151 4.53187   5
  -1   4 -14 74.0032 5.55325   2
   1   4  14 66.4232 4.27894  16
  -1   4 -14 64.6708 5.52735  10
  -1  -4 -14 59.5792 4.73269   5
  -1   4 -14 65.8917 4.81657  15
   1   4  14 69.7612 5.96369   4
  -1  -4 -14 72.8329 5.33043   2
  -1  -4 -14 67.4770 4.33947   3
   1  -4  14 69.4991 5.86329   7
   1  -4  14 66.6538 5.58492  10
  -1   4 -14 63.9789 4.86227   1
  -1   4 -14 67.3972 4.62261   9
   1  -4  15 34.5812 4.14374   4
   1  -4  15 40.2922 4.22086  10
   1   4  15 39.4658 3.74002  14
  -1   4 -15 52.4268 3.50625   8
  -1   4 -15 42.9416 4.43809  10
   1   4  15 38.0081 3.83223   2
  -1   4 -15 49.1637 4.27482   2
  -1   4 -15 46.4548 3.30584   9
  -1  -4 -15 39.2417 3.86740   2
   1   4  15 38.1636 3.48548  15
  -1  -4 -15 37.6545 3.39078   5
  -1   4 -15 50.4251 3.20749  16
  -1   4 -15 47.7706 3.68351   1
   1  -4  15 44.1142 3.79668   8
   1   4  15 39.6690 4.11724  17
   1  -4  15 39.7962 3.68558  15
   1   4  15 42.1338 2.88869  16
   1  -4  15 39.3133 3.06851  16
   1   4  15 42.5043 2.93781  13
   1  -4  15 39.1270 4.48733   7
  -1  -4 -16 14.4510 2.76685   2
  -1   4 -16 21.2717 2.04098  16
  -1   4 -16 20.3240 3.55165  10
   1  -4  16 16.9362 3.25626   7
  -1  -4 -16 19.2268 2.30974   5
   1   4  16 21.1935 2.77314  14
  -1   4 -16 20.1123 2.47215   1
  -1   4 -16 27.8819 2.43472   5
  -1   4 -16 21.0931 3.28860   2
   1   4  16 19.2577 1.79262  13
   1  -4  16 14.5244 2.40955  15
   1  -4  16 22.9068 2.74199   8
   1   4  16 20.6454 1.69825  16
   1  -4  16 21.8571 2.02257  16
   1   4  16 18.1914 2.42131  15
  -1   4 -17 26.5614 3.61759   2
   1   4  17 23.8530 2.80665  15
  -1   4 -17 24.9141 2.59916   5
   1   4  17 26.6382 3.15721  14
  -1   4 -17 24.7555 2.86248   1
  -1   4 -17 28.0968 2.33060  16
   1  -4  17 27.6832 3.11216  15
   1  -4  17 23.7745 2.23943  16
   1   4  17 25.3973 1.98056  16
   1  -4  17 21.7452 2.77798   8
   1   4  17 26.2713 2.55432   7
  -1  -4 -17 22.1576 3.19034   2
   1  -4  17 27.6358 3.93157   7
  -1  -4 -17 23.4132 2.67470   5
  -1   4 -17 22.5604 3.66588  10
   1  -4  18 29.7224 4.38099   7
  -1   4 -18 35.6085 4.36838   2
   1  -4  18 34.5126 3.64016  14
   1   4  18 34.2060 3.70806  14
  -1   4 -18 37.9250 3.37495   5
  -1   4 -18 38.0342 3.42664   1
  -1   4 -18 37.1942 4.55198  10
   1  -4  18 36.2770 5.29947   6
   1   4  18 36.4507 3.46271  15
   1  -4  18 29.7386 3.32325   8
   1   4  18 35.5954 3.15327   7
   1   4  18 34.9367 2.72794  13
  -1  -4 -18 35.8380 3.96173   2
   1  -4  19 0.61788 1.90136  15
   1   4  19-0.76341 1.15110  13
   1  -4  19-2.98766 3.48305   6
   1   4  19-1.28174 1.67929   7
   1   4  19 1.03178 1.81617  15
   1  -4  19 2.85910 1.88586   8
  -1   4 -19-2.55910 3.00306   2
  -1   4 -19 3.89229 1.84741   5
  -1   4 -19 0.45003 2.94728  10
  -1  -4 -19-0.35183 2.37781   2
   1  -4  19 0.44754 3.13330   7
   1   4  20 31.6237 3.32712  15
  -1   4 -20 33.1755 4.33740   2
   1  -4  20 25.7081 3.33436  14
   1  -4  20 27.2619 3.05033   8
  -1   4 -20 35.5722 3.14302   5
   1   4  20 22.1883 3.43856  14
   1  -4  20 23.0655 3.53785  15
   1  -4  20 20.4167 4.13626   7
  -1   4 -20 29.1276 4.50085  10
  -1  -4 -20 19.0277 3.60859   2
   1  -4  20 34.5175 5.28454   6
   1   4  21 13.1952 2.71574  15
  -1   4 -21 11.6051 3.62571  10
   1   4  21 9.03709 2.70138  14
   1  -4  21 14.2349 2.75086  15
   1  -4  21 6.58397 4.46553   6
  -1  -4 -21 8.62300 2.93221   2
   1  -4  21 6.70472 3.39077   7
   1  -4  21 11.7851 2.69566  14
  -1   4 -22 19.7554 3.86158   2
   1  -4  22 10.2833 2.88842  15
  -1  -4 -22 18.9771 3.75264   2
   1   4  22 21.4871 3.11604  15
   1   4  22 14.4841 3.11865  14
  -1   4 -22 21.1638 4.49895  10
   1  -4  22 14.9678 3.06501  14
  -1  -5  23 1.07110 2.39899  14
  -1   5  22 15.2551 3.30820  14
  -1  -5  22 21.6287 4.50251   7
  -1  -5  22 11.8051 2.96442  15
   1  -5 -22 10.9647 3.28068   2
  -1   5  22 18.2637 2.91749  15
   1   5 -22 18.4419 4.44426  10
  -1  -5  22 12.5271 2.97301  14
   1   5 -21 11.0033 3.88273  10
  -1  -5  21 6.80312 3.66576   7
  -1  -5  21 10.1432 2.57341   8
  -1  -5  21 4.90369 2.53318  15
  -1   5  21 7.56424 2.89786  14
   1   5 -21 2.82198 3.02677   2
   1  -5 -21 8.61660 2.96349   2
  -1   5  21 6.39420 2.19453  15
   1   5 -20 35.2819 3.29883   5
   1   5 -20 32.1857 4.65384  10
  -1   5  20 33.8387 2.65012  13
   1  -5 -20 32.9740 3.91754   2
   1   5 -20 40.7833 4.76488   2
  -1  -5  20 28.4709 3.63335  15
  -1  -5  20 35.4507 4.88554   7
  -1   5  20 26.5492 3.58329  14
  -1  -5  20 26.0948 3.60336   8
  -1   5  19-1.21784 1.92815  14
  -1  -5  19-1.94459 3.36475   7
   1   5 -19-0.26351 1.29718  16
  -1   5  19 1.49655 1.09400  13
   1   5 -19 0.89637 2.87748  10
  -1  -5  19-0.60271 3.33598   6
   1   5 -19-2.53389 2.11439   1
  -1   5  19 1.22970 1.90759  15
   1  -5 -19 0.32094 2.28497   2
  -1  -5  19-1.73690 2.07234  15
   1   5 -19 0.41316 2.57990   2
  -1  -5  19 3.10606 2.36561   8
   1   5 -19 2.70984 1.70322   5
  -1  -5  18 11.6404 3.60372   7
  -1   5  18 12.3677 2.34188  15
  -1  -5  18 21.5668 2.89576   8
   1  -5 -18 19.6459 3.11254   2
   1   5 -18 22.7240 2.08931  16
   1   5 -18 24.0517 3.74021  10
  -1   5  18 20.8265 1.91008  13
   1   5 -18 33.0256 3.90745   2
   1   5 -18 22.8028 2.85626   1
  -1  -5  18 29.1575 4.36510   6
  -1  -5  18 18.5146 2.79182  15
   1   5 -17 2.37764 2.63142  10
  -1   5  17 1.84460 1.51283   6
  -1   5  17 1.78100 1.20317   7
  -1  -5  17-0.27671 2.13955   8
  -1  -5  17-1.78630 2.81093   7
   1  -5 -17 2.84177 2.14535   2
  -1  -5  17 1.33675 1.18475  16
   1  -5 -17 3.59791 1.34794   5
   1   5 -17 2.69724 1.21636  16
  -1   5  17 1.63886 1.00926  13
   1   5 -17 0.94615 1.86377   1
  -1  -5  17 5.06245 1.95780  15
  -1   5  17 3.41171 1.68844  15
   1   5 -17 2.87749 2.44858   2
  -1  -5  17 2.70882 3.08166   6
  -1   5  17 1.86468 1.84757  14
  -1   5  16 33.5350 3.38287  14
  -1   5  16 36.9809 2.38370  16
   1  -5 -16 36.2282 3.61277   2
  -1  -5  16 34.6546 2.68035  16
  -1   5  16 29.0532 2.19264   8
  -1   5  16 34.8830 2.55987  13
  -1   5  16 39.6033 3.09241   6
   1   5 -16 36.9181 2.77554  16
  -1   5  16 29.9562 3.00160  15
  -1  -5  16 39.1380 3.72017   8
  -1   5  16 35.0738 2.74038   7
   1  -5 -16 40.0067 2.91752   5
  -1   5  16 32.1528 3.39333   2
   1   5 -16 36.5758 4.22471  10
  -1  -5  16 27.6296 3.83005   4
  -1  -5  16 25.5973 4.33276   6
  -1  -5  16 32.3415 4.36034   7
   1   5 -16 34.6690 3.93621   2
  -1  -5  16 31.6564 3.26007  15
  -1   5  16 37.6989 2.65222   5
   1   5 -16 42.0684 3.53974   1
  -1   5  15 14.7452 2.19445  14
  -1  -5  15 11.5767 2.79752  10
  -1   5  15 11.9840 1.41838   5
  -1   5  15 11.8903 2.23217   2
  -1  -5  15 11.1657 2.32590   8
  -1  -5  15 10.6620 2.62133   4
  -1  -5  15 13.0089 2.99521   7
   1   5 -15 10.1554 1.64062   9
   1   5 -15 13.3938 2.45573   2
  -1   5  15 13.9082 1.81914   6
  -1  -5  15 12.5545 3.10340   6
  -1  -5  15 10.6241 1.45406  16
  -1   5  15 9.66024 1.14019   8
   1  -5 -15 12.2202 2.31610   2
   1   5 -15 12.9030 2.81590  10
   1   5 -15 11.4347 1.50093  16
   1   5 -15 12.9338 1.91664   3
   1   5 -15 9.90855 2.02731   1
  -1   5  15 10.7397 1.14213  16
  -1   5  15 10.0797 1.46923   7
  -1   5  15 11.0288 2.99426   4
  -1  -5  15 8.70821 1.85638  15
  -1   5  15 11.4260 1.80279  15
   1   5 -15 7.98277 1.73588  15
  -1   5  15 14.4739 2.80109  17
  -1   5  15 15.1197 3.10705  10
  -1   5  14 60.2873 4.68737  17
  -1   5  14 49.5242 4.60739  10
  -1  -5  14 48.7959 3.46517  16
   1   5 -14 50.7580 3.68647  13
  -1  -5  14 40.8141 3.84067  15
  -1   5  14 54.0792 4.92497   4
  -1  -5  14 43.0009 4.37883   4
   1   5 -14 52.4302 3.97846   8
  -1   5  14 46.9154 4.01852  14
   1   5 -14 47.6281 3.70442   9
  -1   5  14 53.1942 3.76857   6
   1   5 -14 45.4381 4.64904  10
   1  -5 -14 47.3049 4.12259   2
   1   5 -14 48.9571 4.06821   1
  -1   5  14 61.6803 4.38879   2
   1   5 -14 50.3144 3.51909  16
  -1   5  14 45.5797 3.72984  15
  -1   5  14 53.1517 3.47184   5
  -1   5  14 44.7398 3.25712   8
  -1  -5  14 45.6341 4.21650   8
  -1  -5  14 48.4419 4.86682   7
   1   5 -14 47.2845 3.75715  15
   1   5 -14 62.0751 4.59745   2
   1   5 -14 50.8129 3.84599   3
  -1   5  14 47.3314 3.31702  13
  -1   5  14 48.7105 3.51724   7
  -1  -5  14 54.2914 4.57203  10
  -1  -5  13-1.26057 1.81481   8
   1   5 -13 1.80812 1.45372   8
   1   5 -13 1.12505 1.30886   9
  -1   5  13-0.68538 0.82931   8
  -1  -5  13 0.36713 2.14021   7
  -1   5  13 1.13843 0.80561  13
   1   5 -13-0.21224 1.08927  16
  -1   5  13 2.36034 1.08770   7
   1   5 -13 1.31904 1.25707  15
   1   5 -13-1.81824 2.12186  10
   1   5 -13 0.16371 1.24040   3
  -1  -5  13 0.09635 0.98638  16
  -1   5  13 1.37609 1.46012  14
  -1   5  13-0.86262 2.04737  10
  -1   5  13-0.41410 1.63565   2
   1   5 -13 0.20021 1.53141   1
   1   5 -13 0.53569 1.64870   2
  -1   5  13 0.12998 0.66042   3
  -1  -5  13 4.34905 2.03899  10
  -1   5  13 0.15273 1.11139  15
   1   5 -13 0.65906 1.16438  13
  -1   5  13 1.72593 1.17136   6
  -1   5  13 1.77165 1.97231  17
  -1   5  13 0.67546 2.22631   4
   1  -5 -13-0.65254 1.58255   2
  -1  -5  13 1.03221 1.88726   4
  -1   5  13 1.64428 1.04082   5
  -1  -5  13 1.12113 1.26318  15
  -1   5  13 0.51249 0.49420   9
  -1   5  13 0.44825 0.39322  12
  -1   5  12 42.8382 2.73727  13
   1   5 -12 45.3240 3.68236   2
   1   5 -12 42.5738 2.93382  16
   1  -5 -12 35.6521 3.37930   2
  -1   5  12 40.6607 2.94500   5
  -1  -5  12 33.7039 3.55338   8
  -1  -5  12 38.5781 2.86620  16
   1   5 -12 48.0771 3.46051   8
  -1   5  12 38.9925 3.07245   6
  -1   5  12 41.0442 2.74951   3
  -1   5  12 39.0802 2.83535   8
   1   5 -12 42.5994 3.27160   9
   1   5 -12 37.0332 3.19142   3
  -1   5  12 48.8285 3.76438  17
  -1   5  12 34.6167 3.02682  15
   1   5 -12 44.5494 4.03098  10
   1   5 -12 46.6410 3.17512  15
   1   5 -12 35.8440 2.97565  13
  -1   5  12 36.4134 2.62166   9
  -1  -5  12 31.7956 3.47615   4
  -1   5  12 40.3573 3.33479  14
  -1   5  12 41.2536 3.48297   2
  -1  -5  12 34.5130 3.71497  10
  -1   5  12 37.0857 3.84901  10
  -1  -5  12 40.0465 3.24293  15
   1   5 -12 44.8148 3.49346   1
  -1   5  12 42.5840 2.99743   7
  -1   5  12 43.4583 4.08602   4
  -1   5  11 27.1721 2.21849   6
   1   5 -11 23.3528 2.63121   2
  -1   5  11 23.3722 1.75657  13
   1   5 -11 19.1588 2.24645   9
  -1   5  11 23.2887 2.74797  17
  -1  -5  11 23.4260 2.25045  15
  -1  -5  11 17.3955 2.48256   4
   1   5 -11 24.7043 2.09742  13
  -1   5  11 20.6830 2.40929   2
  -1  -5  11 21.0647 2.67153   8
   1   5 -11 23.5226 1.95309  16
  -1   5  11 21.4160 1.82549   9
  -1   5  11 20.6254 1.96531   7
   1   5 -11 25.3056 2.13371  15
  -1   5  11 24.5071 2.32763  14
   1   5 -11 25.2231 2.40129   8
  -1   5  11 24.4470 1.88796   3
   1   5 -11 23.8838 2.33931   3
  -1   5  11 26.3809 2.89694  10
   1   5 -11 28.1241 2.98063  10
   1  -5 -11 23.5587 2.49270   2
  -1   5  11 24.5047 1.98985   8
  -1   5  11 21.8215 2.06474  15
  -1  -5  11 24.2958 3.30250   6
  -1  -5  11 19.7822 2.67236  10
  -1   5  11 25.7996 3.07530   4
  -1   5  11 23.0141 2.02470   5
   1   5 -11 23.5801 2.42654   1
  -1  -5  11 24.1881 1.94777  16
   1   5 -10 118.843 7.74347  10
  -1   5  10 114.532 7.48998  17
   1   5 -10 113.598 7.02469  13
  -1  -5  10 109.267 7.53322  10
   1   5 -10 108.133 7.55470   4
  -1   5  10 102.947 6.96921  15
  -1   5  10 111.206 6.91202   3
  -1  -5  10 98.7802 7.49756   8
  -1  -5  10 119.332 7.29873   9
  -1   5  10 121.331 7.91245   4
  -1   5  10 103.831 7.16733  14
  -1   5  10 116.045 6.65047  11
  -1   5  10 105.037 7.03366   6
   1   5 -10 114.666 7.02702  15
  -1  -5  10 110.697 7.18674  15
   1   5 -10 112.263 6.92960  16
  -1  -5  10 118.497 8.27253   6
  -1   5  10 108.623 6.85976   9
   1   5 -10 109.766 7.33402   1
  -1  -5  10 108.305 6.87436  16
  -1   5  10 112.329 6.73671  13
  -1   5  10 116.169 7.65322  10
   1   5 -10 121.958 7.62343   2
  -1   5  10 118.914 7.00112   5
   1   5 -10 108.260 7.22432   3
  -1  -5  10 98.4826 7.36720   4
   1   5 -10 113.467 7.29073   9
   1   5 -10 117.597 7.37664   8
  -1   5  10 105.635 6.92539   8
  -1   5  10 108.108 6.99271   7
  -1   5  10 106.444 7.31517   2
  -1   5   9 36.1639 2.66673   9
  -1   5   9 33.6534 2.67202   3
  -1   5   9 36.5071 2.80153   6
  -1   5   9 35.0065 2.30512   1
  -1   5   9 38.4515 3.33761  10
  -1   5   9 40.2681 2.77736   5
  -1  -5   9 37.4819 3.39411   8
  -1   5   9 39.3454 2.88508  14
   1   5  -9 36.5217 2.68266  15
  -1  -5   9 40.4496 3.79770   6
   1   5  -9 28.6803 3.10290   4
  -1   5   9 36.6058 2.45126  13
  -1   5   9 40.1287 3.25353  17
  -1   5   9 40.0092 2.43982  11
  -1   5   9 36.5556 2.71343   8
   1   5  -9 31.3211 2.91849   3
  -1   5   9 36.0396 2.67953  15
   1   5  -9 37.9712 3.07621   8
   1   5  -9 46.1054 3.38643   2
  -1  -5   9 37.7975 3.05058   9
  -1   5   9 37.0673 2.77879   7
   1   5  -9 42.3946 3.43565  10
  -1  -5   9 35.4176 3.65900   7
   1   5  -9 35.7942 2.64493  16
  -1  -5   9 34.6140 2.59465  16
  -1   5   9 40.9885 3.16022   2
   1   5  -9 36.6035 2.73219  13
  -1  -5   9 35.5469 3.08005   4
   1   5  -9 35.3833 3.01953   9
  -1  -5   9 38.1720 3.28030  10
  -1   5   9 40.6940 3.51686   4
   1   5  -9 35.7616 3.03076   1
  -1   5   8 180.879 11.1054  10
   1   5  -8 174.034 11.0404   4
  -1   5   8 164.919 10.7066   7
   1   5  -8 175.640 10.9584   1
  -1   5   8 168.380 10.5893  15
  -1   5   8 173.233 10.6866   3
   1   5  -8 179.114 10.6194  16
   1   5  -8 176.050 10.8883   3
  -1   5   8 171.560 10.9779  17
  -1  -5   8 183.063 11.6947   6
  -1  -5   8 147.554 11.1018   8
  -1   5   8 162.125 10.7217   6
   1   5  -8 162.522 10.8883   9
  -1  -5   8 168.696 10.5330  16
  -1   5   8 160.293 10.8875   2
  -1   5   8 158.896 10.6322   9
  -1   5   8 174.336 10.3698   1
   1   5  -8 169.275 11.1386  10
  -1  -5   8 167.620 11.0698  10
  -1   5   8 177.768 10.7164   5
  -1  -5   8 175.875 11.5615   7
   1   5  -8 179.143 10.6199  15
  -1   5   8 164.924 10.7182  14
  -1  -5   8 176.306 10.9024   4
   1   5  -8 184.742 11.0347   8
  -1   5   8 168.137 10.4139  13
  -1  -5   8 175.372 10.9369   9
   1   5  -8 195.344 10.7015  13
  -1   5   8 171.289 10.6782   8
  -1   5   8 187.043 11.2403   4
   1   5  -7 24.9751 2.50067   4
   1   5  -7 30.5976 2.74947  10
  -1   5   7 24.4672 2.22312  14
  -1   5   7 25.5596 1.99148   1
  -1   5   7 35.1400 2.68233  17
  -1   5   7 27.9202 2.35339   7
   1   5  -7 32.9006 2.20361  15
   1   5  -7 32.0745 2.69794   8
  -1  -5   7 33.1351 2.47571   4
  -1   5   7 29.9057 2.35552   3
   1   5  -7 27.7132 2.56020   9
  -1   5   7 32.8130 2.71518  10
  -1   5   7 24.9383 2.08705  15
  -1   5   7 38.4500 2.14820  11
  -1   5   7 26.3598 2.27657   9
  -1  -5   7 28.7555 2.14769  16
  -1   5   7 28.1479 2.35735   6
  -1  -5   7 28.7739 2.57427   9
   1   5  -7 28.6337 2.53656   1
   1   5  -7 25.6984 2.50118   3
  -1   5   7 30.1461 2.01172  13
  -1   5   7 31.1923 2.37233   5
  -1   5   7 29.6282 2.32934   8
  -1   5   7 35.0921 2.82103   4
   1   5  -7 29.4831 2.27981  13
  -1   5   7 27.9690 2.53129   2
  -1   5   6 43.9221 2.82498  16
  -1   5   6 39.3676 2.83097  15
  -1   5   6 44.0145 3.24398   2
  -1   5   6 42.9370 3.23545  10
   1   5  -6 44.2496 2.89075  15
  -1   5   6 38.6593 3.25679   4
   1   5  -6 41.9238 3.25248   3
  -1  -5   6 47.7297 3.12243   4
  -1   5   6 40.3922 3.12486   7
  -1   5   6 46.2669 3.17813   6
  -1  -5   6 40.4542 2.97404  15
   1   5  -6 47.6579 3.67298   7
   1   5  -6 45.5040 3.25201   1
  -1   5   6 43.5607 2.77625  13
  -1   5   6 38.8507 3.06182   9
  -1   5   6 40.8454 3.09554   8
  -1   5   6 39.7664 3.08290   5
  -1   5   6 39.9593 2.96977  14
  -1   5   6 39.2611 2.78036   1
  -1   5   6 43.7880 3.09231   3
   1   5  -6 40.4976 3.15877   4
  -1   5   6 51.5592 2.87269  11
   1   5  -6 46.7244 3.39178   8
   1   5  -6 47.0725 3.38746   9
   1   5  -6 45.7885 3.40278  10
  -1   5   6 44.1557 3.27933  17
  -1   5   5 53.3540 3.80411   5
   1   5  -5 50.1002 4.01396   9
  -1   5   5 52.2476 3.83159   8
   1   5  -5 58.0863 3.56904  15
  -1   5   5 59.6693 3.97961  17
   1   5  -5 56.6378 3.78281   4
  -1  -5   5 54.0913 3.65533  15
  -1   5   5 62.6673 3.93655  10
  -1   5   5 52.2139 3.86099   6
  -1   5   5 51.9895 3.54877   1
  -1  -5   5 50.4909 3.67607   4
   1   5  -5 60.5028 4.07438  10
  -1   5   5 52.5447 3.62741  14
  -1   5   5 58.0969 3.94855   7
  -1   5   5 57.0990 3.84813   9
   1   5  -5 54.9510 3.94593   1
   1   5  -5 52.0613 3.95822   3
  -1   5   5 58.7356 3.86603   3
  -1   5   5 60.9191 3.58820  16
  -1   5   5 61.3876 3.98548   4
  -1   5   5 64.4738 3.98519   2
   1   5  -5 52.5392 4.03297   8
   1  -5  -4 101.379 6.19581   7
  -1   5   4 94.0258 5.93698  14
  -1   5   4 103.241 5.95000  16
   1   5  -4 98.3787 5.87961  15
  -1   5   4 106.547 6.29187   2
  -1   5   4 94.1262 6.13110   5
   1   5  -4 104.362 6.36766  10
  -1   5   4 93.9034 6.26408   6
   1   5  -4 93.7302 6.01503   4
  -1   5   4 91.2716 6.19545   9
  -1   5   4 97.0941 6.30935   7
  -1   5   4 90.9268 6.22188   8
  -1   5   4 98.0248 6.16807   4
   1   5  -4 94.8828 6.37534   8
  -1  -5   4 95.4219 5.96102  15
  -1   5   4 93.6783 5.95340   1
   1  -5  -4 97.5989 6.10843   6
  -1  -5   4 100.798 5.91747  14
  -1   5   4 100.723 6.16690  10
  -1  -5   4 88.5685 5.96842   4
   1   5  -4 102.211 6.35409   3
   1  -5  -4 105.271 6.30874   8
  -1   5   4 98.7447 6.24998  17
   1   5  -4 89.0378 6.23259   1
  -1   5   4 102.525 6.24851   3
   1   5  -4 93.2921 6.33343   9
  -1   5   3 115.149 6.61886  16
  -1   5   3 118.835 6.84220   5
  -1   5   3 99.4724 6.89700   8
  -1   5   3 114.315 6.89209  17
   1   5  -3 106.012 6.48381  15
  -1   5   3 112.325 7.04378   7
   1   5  -3 101.905 6.84421   1
   1  -5  -3 117.605 6.94846   7
  -1   5   3 115.592 7.01482   6
  -1   5   3 107.592 6.88802   3
   1   5  -3 103.765 7.01302   8
   1   5  -3 102.238 6.96108   9
   1   5  -3 106.507 6.58028   4
  -1   5   3 102.081 6.53648  14
   1   5  -3 114.596 6.95658  10
  -1   5   3 117.394 6.77178  10
  -1  -5   3 109.626 6.56864  15
  -1   5   3 109.283 6.92538   9
  -1   5   3 104.105 6.63695   1
   1  -5  -3 109.066 6.95155   8
   1   5  -3 110.076 6.93814   3
  -1  -5   3 104.703 6.53665  14
  -1   5   3 108.157 6.70212   4
   1  -5  -3 103.543 6.68040  17
   1  -5  -3 115.065 6.86431   6
  -1  -5   3 116.874 7.33567   6
   1   5  -2 274.801 16.1478   4
   1   5  -2 267.308 16.5917   9
   1   5  -2 253.879 16.7155   7
  -1   5   2 268.833 16.0966  14
  -1   5   2 249.672 16.4498   3
   1  -5  -2 268.675 16.2900  17
  -1  -5   2 287.643 16.1550  14
  -1  -5   2 288.798 16.8243   6
  -1   5   2 275.166 16.6740   7
   1   5  -2 273.507 16.0771  15
  -1  -5   2 290.832 16.2680  17
   1   5  -2 281.226 16.5663   3
  -1   5   2 282.770 16.1849   4
  -1   5   2 264.774 16.5540   8
   1  -5  -2 280.353 16.6539   7
  -1   5   2 281.531 16.6595   6
   1  -5  -2 293.543 16.6157   6
  -1   5   2 286.418 16.3058   1
  -1   5   2 253.778 16.4332  17
   1   5  -1 23.5007 1.52479   4
  -1  -5   1 22.1488 1.54238  14
  -1   5   1 21.6408 2.22665   7
   1  -5  -1 23.4740 2.18779   7
  -1   5   1 23.5900 1.79061   1
  -1  -5   1 20.1562 2.11250   6
  -1   5   1 20.3379 1.90240  17
   1   5  -1 25.4214 2.32289   7
   1  -5  -1 23.0189 2.18685   6
  -1  -5   1 19.9340 2.16136   7
   1   5  -1 21.1335 2.05413   9
   1   5  -1 18.9777 2.15336   6
  -1   5   1 20.7306 1.38550  14
   1   5  -1 22.8635 2.04286   3
  -1  -5   1 22.3528 1.47134  17
  -1   5   1 21.7385 2.20784   6
   1  -5  -1 19.1308 1.73798  17
   1   5  -1 20.8339 1.40370  15
   1   5   0 174.324 10.4686  14
  -1   5   0 178.662 10.5141  15
   1  -5   0 157.885 10.6816  17
   1   5   0 158.333 10.6940   1
  -1  -5   0 183.718 11.0852   7
   1   5   0 170.398 10.9754   7
   1  -5   0 170.327 11.0468   6
  -1  -5   0 184.109 10.9146   6
  -1  -5   0 212.097 10.6875   1
  -1  -5   0 178.035 10.3375  17
   1   5   0 175.797 10.3491  15
   1   5   0 181.526 10.9141   6
  -1   5   0 170.930 11.0598   6
  -1  -5   0 178.670 10.4888  14
  -1   5  -1 84.3463 5.51683   9
   1   5   1 83.3900 5.46867   8
  -1   5  -1 83.2615 5.45676   3
  -1  -5  -1 85.7521 5.10280  14
  -1  -5  -1 80.1445 5.54255   7
  -1   5  -1 83.8122 5.12814  15
   1  -5   1 74.7926 5.37255  17
   1  -5   1 90.4629 5.15500  16
  -1   5  -1 76.1821 5.55916   8
   1   5   1 77.5930 5.40963   6
   1   5   1 76.2569 5.10413  14
  -1  -5  -1 88.9471 5.62275   8
  -1  -5  -1 78.1082 5.38078   6
   1   5   1 83.8020 5.29620   1
   1  -5   1 86.7440 5.77958   6
   1   5   1 85.8543 5.59321   7
  -1   5  -1 89.4777 5.20937  10
  -1   5  -1 77.0743 5.74275   6
   1   5   1 84.9148 5.10581  17
  -1  -5  -2 214.321 12.5717   6
   1   5   2 200.487 12.7500   7
  -1   5  -2 173.630 12.5477   1
   1   5   2 219.536 12.4634  14
   1   5   2 203.000 12.7230   8
  -1  -5  -2 220.281 12.7930   7
  -1  -5  -2 227.529 12.8669   8
   1  -5   2 212.564 12.4546  16
  -1   5  -2 218.163 13.1458   6
  -1   5  -2 223.514 12.8384   9
   1   5   2 206.531 12.7400   9
   1   5   2 203.559 12.7420   3
   1   5   2 207.226 12.5543   1
   1   5   2 210.764 12.2492  15
   1   5   2 209.092 12.6669   6
  -1   5  -2 210.733 12.5444  10
   1   5   2 206.630 12.4543  17
   1  -5   2 203.041 12.8495  17
  -1   5  -2 222.456 12.9108   8
  -1   5  -2 212.961 12.4496  15
   1   5   3 110.291 6.41404  17
   1   5   3 106.606 6.51682   6
   1   5   3 105.517 6.41215   1
   1   5   3 107.117 6.64083   7
   1   5   3 99.7951 6.58925   9
  -1   5  -3 102.494 6.54043   1
   1   5   3 108.392 6.61812   5
   1   5   3 111.342 6.77998   2
  -1   5  -3 101.287 6.71863   9
   1   5   3 102.930 6.60404   4
  -1   5  -3 113.079 6.50953  10
  -1  -5  -3 102.294 6.66328   8
   1  -5   3 102.974 6.14012  14
   1   5   3 99.3074 6.37365  14
  -1  -5  -3 115.477 6.37127   6
  -1  -5  -3 108.844 6.55740   7
  -1   5  -3 107.835 6.81596   8
   1  -5   3 106.093 6.17624   4
   1   5   3 108.784 6.67059   3
   1  -5   3 100.151 6.34628  16
   1   5   3 90.7956 6.51569   8
   1  -5   3 104.274 6.88812  17
  -1   5  -3 102.505 6.34213  15
   1   5   3 90.7705 6.15706  15
   1   5   4 93.0925 5.56460   2
  -1  -5  -4 82.9827 5.32992   9
  -1   5  -4 81.9340 5.27404  10
   1   5   4 81.9833 5.08656   1
   1   5   4 76.1353 5.23683   8
   1   5   4 84.0669 5.31503   9
   1   5   4 74.1379 4.90472  15
   1  -5   4 73.5719 5.03825  16
   1  -5   4 84.1117 5.19354  15
   1   5   4 97.0527 5.54639  10
  -1  -5  -4 86.7432 5.16726   7
  -1   5  -4 81.5852 5.85205   7
   1   5   4 82.1898 5.36253   3
   1   5   4 83.6523 5.19335  17
  -1   5  -4 81.7677 5.09379  15
   1   5   4 77.7543 5.13637  14
   1   5   4 85.1196 5.39046   5
   1  -5   4 77.1410 5.00945   4
  -1   5  -4 80.6346 5.27982   1
  -1  -5  -4 85.8051 5.36987   8
   1   5   4 80.0523 5.28864   7
  -1   5  -4 76.8852 5.45034   9
  -1   5  -4 79.9918 5.50677   8
   1   5   4 86.6434 5.45664   4
   1   5   4 82.5319 5.21871   6
   1   5   5 54.1213 3.72559   2
   1   5   5 45.1177 3.36823   8
   1  -5   5 52.8067 3.42810  15
   1   5   5 52.7939 3.45229  17
   1   5   5 46.2466 3.35461   6
  -1   5  -5 47.3232 3.69388   8
  -1   5  -5 49.1498 3.29350  15
  -1   5  -5 53.1958 4.11135   7
   1  -5   5 45.6372 3.29219   4
   1  -5   5 51.2451 3.53580  10
   1   5   5 48.7787 3.12099  15
  -1   5  -5 47.3413 3.44189   1
   1   5   5 52.4027 3.75040   4
   1   5   5 45.6314 3.39189   7
  -1  -5  -5 49.4744 3.45091   9
   1   5   5 48.7561 3.54146   5
   1   5   5 48.5312 3.49357   3
   1   5   5 49.0774 3.20483   1
   1   5   5 46.9045 3.37825  14
   1   5   5 60.0311 3.82222  10
  -1  -5  -5 52.4071 3.46299   8
  -1   5  -5 44.5514 3.63792   9
  -1   5  -5 47.5473 3.50475  10
   1   5   5 46.2850 3.39829   9
   1   5   6 102.761 6.61707   7
  -1   5  -6 104.316 6.61470  13
   1   5   6 109.192 6.59042   6
  -1   5  -6 120.745 6.95447  10
   1   5   6 104.517 6.41165   1
   1   5   6 106.270 6.63658   9
   1   5   6 109.002 6.75093   5
  -1   5  -6 108.427 6.98341   8
   1  -5   6 100.050 6.63788   4
   1   5   6 100.536 6.65858  14
   1   5   6 102.075 6.72472   3
   1   5   6 109.676 7.01143  10
  -1   5  -6 93.9323 6.69291   1
   1   5   6 97.7637 6.41423  15
   1   5   6 100.087 6.57883   8
  -1  -5  -6 114.911 6.69536   9
  -1   5  -6 104.497 7.29616   7
   1  -5   6 100.008 6.78315  10
   1   5   6 112.814 7.11533   4
   1   5   6 106.642 6.94248   2
   1   5   6 115.200 6.76176  17
  -1   5  -6 106.485 6.57727  15
  -1   5  -6 110.124 6.95437   9
   1   5   6 106.249 6.29424  13
   1   5   7 60.8434 3.98564   1
   1  -5   7 59.3201 4.75345   8
   1   5   7 62.6012 4.35761   3
   1  -5   7 58.6116 4.14390  16
   1  -5   7 61.8262 5.25071   6
  -1   5  -7 63.1382 4.98833   7
   1   5   7 65.2647 4.43989   5
   1   5   7 65.9678 4.87694   4
   1   5   7 63.3574 4.23746   6
   1   5   7 69.4945 3.95369  13
  -1   5  -7 73.0217 4.33400  15
  -1   5  -7 72.6874 4.26031  16
   1   5   7 77.3909 4.91990  10
   1   5   7 62.6467 4.25610   7
  -1   5  -7 57.1056 4.53318   9
  -1  -5  -7 77.3060 4.36596   9
   1  -5   7 62.0906 4.43304   4
   1   5   7 67.0397 4.72426   2
  -1   5  -7 62.9837 4.32280  13
   1   5   7 59.7142 4.37049  14
  -1   5  -7 65.4936 4.65615   8
   1   5   7 57.9804 4.19389   9
  -1   5  -7 71.7249 4.71064  10
   1  -5   7 65.1321 4.60161  10
   1  -5   7 52.1566 5.04905   7
  -1   5  -7 63.7629 4.46272   1
   1   5   7 63.7077 4.23369   8
   1   5   7 72.5629 4.52399  17
   1   5   7 58.2362 4.10833  15
   1   5   8 43.9753 3.10208  15
  -1   5  -8 48.0008 3.62395   8
   1  -5   8 46.3138 3.66367  10
   1   5   8 45.3687 2.85412  13
  -1   5  -8 45.5229 3.54948   9
   1   5   8 40.6126 3.11621   7
   1   5   8 50.2813 3.98729   4
   1  -5   8 45.5722 3.81778   8
   1   5   8 48.0833 3.88171  10
   1  -5   8 43.6772 3.10942  16
   1  -5   8 40.7878 4.19729   6
   1   5   8 41.0515 3.08427   8
   1   5   8 43.6762 3.24987   3
  -1   5  -8 46.6821 4.03468   7
   1   5   8 46.0781 2.81575   1
  -1   5  -8 46.8002 3.14242  16
   1   5   8 40.9495 3.32256  14
   1   5   8 48.5760 3.13102   9
   1   5   8 46.3225 3.17101   6
   1  -5   8 40.2222 3.43559   4
  -1   5  -8 47.5583 3.44946   1
  -1   5  -8 45.7970 3.25112  15
   1   5   8 42.6878 3.68410   2
   1   5   8 50.9850 3.54715  17
  -1   5  -8 46.3512 3.69105  10
   1   5   8 48.8460 3.37103   5
  -1   5  -8 47.3282 3.25137  13
   1   5   9 99.4353 6.54671  17
  -1   5  -9 101.582 6.61500   8
   1   5   9 103.187 6.27120   3
  -1   5  -9 87.1325 6.51577   9
  -1   5  -9 105.311 6.21386  16
   1  -5   9 88.2832 6.43643  15
  -1  -5  -9 89.3967 6.63820   2
   1   5   9 91.9276 6.06901   8
   1   5   9 104.610 6.37547   5
   1  -5   9 89.4643 6.55216   4
   1   5   9 104.393 6.93507  10
   1   5   9 108.836 6.82121   2
   1  -5   9 88.6988 6.73006   8
  -1   5  -9 101.403 6.83648  10
   1   5   9 88.0496 6.17599  15
   1  -5   9 94.0676 6.66167  10
  -1   5  -9 106.842 6.30649  13
   1   5   9 94.9073 6.17881   6
  -1   5  -9 92.0231 6.48055   1
   1   5   9 93.5562 6.46364  14
   1   5   9 84.8389 6.10341   7
   1   5   9 130.047 6.00429  11
   1  -5   9 100.588 7.41857   6
   1   5   9 92.1068 5.89361  13
   1   5   9 96.4854 6.06829   9
   1   5   9 104.158 7.05760   4
   1  -5   9 98.0972 6.15068  16
  -1   5  -9 102.438 6.32496  15
   1  -5  10 47.4930 3.92486   4
   1   5  10 50.9014 3.45093   6
   1   5  10 64.4967 3.16256  11
   1  -5  10 42.5804 3.96271  10
   1  -5  10 46.2802 3.36277  16
   1   5  10 41.9819 3.32788   7
  -1  -5 -10 44.0493 3.90199   2
   1   5  10 49.5342 3.58856   5
   1  -5  10 47.0738 3.72337  15
   1   5  10 51.6815 3.99018  17
  -1   5 -10 44.5036 3.73277   9
   1  -5  10 43.8116 3.97342   8
   1  -5  10 43.5247 4.62640   6
  -1   5 -10 50.7338 4.21137  10
   1   5  10 44.8750 3.22089   8
   1   5  10 46.0921 3.20443   9
  -1   5 -10 50.6696 3.84692   8
   1   5  10 47.6756 3.11459  13
   1   5  10 52.1281 4.27864  10
  -1   5 -10 47.9730 3.41384  16
   1   5  10 60.9983 4.68903   4
  -1   5 -10 48.9558 3.81792   1
   1   5  10 50.8359 4.05519   2
   1   5  10 48.4822 3.74824  14
  -1   5 -10 57.3612 3.59570  13
  -1   5 -10 52.9279 3.61336  15
   1   5  10 48.3364 3.39981   3
   1   5  10 47.7048 3.48567  15
   1  -5  11 16.5193 3.03724   6
  -1   5 -11 15.0680 2.03168   9
   1   5  11 22.7248 3.11473   4
   1  -5  11 17.9421 2.41493   8
   1   5  11 17.1178 1.42586   8
   1   5  11 19.8491 1.80688   6
   1  -5  11 18.4604 1.71440  16
  -1  -5 -11 17.3963 2.31394   2
   1   5  11 23.0769 2.43432  17
   1   5  11 14.9042 1.39182   9
   1   5  11 18.6359 1.85513  15
   1   5  11 15.8772 2.36858   2
   1  -5  11 18.5383 2.91632   7
  -1   5 -11 19.6409 1.96479  15
   1   5  11 16.4425 2.07816  14
  -1   5 -11 18.6892 1.74441  16
  -1   5 -11 18.9428 1.81422  13
   1  -5  11 22.4518 2.60509  10
  -1   5 -11 21.0277 2.69661  10
  -1   5 -11 18.0961 2.19969   1
   1   5  11 19.2514 1.93217   5
   1  -5  11 15.9425 2.03231  15
   1   5  11 18.4585 1.40257  13
  -1   5 -11 19.1662 2.23623   8
   1   5  11 19.0470 1.25894  11
   1   5  11 23.2888 2.93302  10
   1   5  11 14.4841 1.61510   7
   1  -5  11 15.5407 2.37401   4
   1   5  11 20.1854 1.68789   3
  -1   5 -12 62.1861 4.67184   9
  -1   5 -12 73.6389 4.69864  15
   1   5  12 74.9073 5.56125  10
   1   5  12 61.0827 4.53149  15
   1   5  12 65.3775 5.14710   2
  -1   5 -12 67.4758 5.32662  10
   1   5  12 60.9357 3.97630   8
   1   5  12 71.7665 4.48212   6
   1   5  12 73.5573 4.32847   3
   1  -5  12 62.1728 6.00859   6
   1   5  12 56.3591 4.23663   7
   1   5  12 67.9109 4.90822  14
  -1  -5 -12 55.9491 4.53850   5
  -1  -5 -12 61.7172 4.93988   2
  -1   5 -12 64.1000 4.37964  16
  -1  -5 -12 65.4861 4.39767   3
   1   5  12 73.4737 5.76186   4
  -1   5 -12 73.4335 4.53783  13
   1   5  12 69.4937 4.52772   5
   1  -5  12 60.9501 5.01304   8
   1  -5  12 63.9073 4.36524  16
   1   5  12 65.9552 3.98538   9
   1  -5  12 62.4105 5.60077   7
   1   5  12 73.7750 5.14131  17
  -1   5 -12 60.8159 4.76975   1
   1  -5  12 66.6379 4.81992  15
  -1   5 -12 72.7465 4.85254   8
   1  -5  12 66.9522 5.19933  10
   1  -5  12 62.1832 5.10658   4
   1   5  12 65.5319 4.10772  13
   1   5  13 69.8022 5.64837  10
   1  -5  13 61.8451 5.29556  10
  -1   5 -13 68.2692 4.71187  15
   1   5  13 64.4142 5.16787   2
  -1   5 -13 63.8064 4.77010   8
  -1   5 -13 67.3321 4.79248   9
  -1  -5 -13 61.5693 5.09141   2
   1  -5  13 63.1283 4.88248  15
   1   5  13 65.4840 4.67410  15
  -1   5 -13 63.0455 5.36897   2
   1  -5  13 66.6077 4.39005  16
   1   5  13 73.1406 5.26976  17
   1   5  13 71.4924 4.54708   6
  -1   5 -13 70.7054 4.45548  16
   1  -5  13 55.5839 5.59966   7
  -1   5 -13 67.3285 4.90985   1
   1  -5  13 69.9574 5.21454   8
  -1   5 -13 64.7130 4.53336  13
   1   5  13 62.1673 4.94760  14
   1  -5  13 63.1997 5.27961   4
   1  -5  13 61.9568 6.06433   6
  -1  -5 -13 65.2684 4.66176   5
   1   5  13 73.3393 5.88753   4
  -1   5 -13 60.0411 5.32438  10
   1   5  13 67.3013 4.50022   5
   1   5  13 62.2566 4.12008  13
   1   5  13 61.2429 4.27996   7
   1   5  13 65.7717 4.26930   3
   1   5  14 104.135 6.91174   2
  -1   5 -14 94.2428 6.09577  16
   1  -5  14 89.5670 6.98494   4
  -1   5 -14 97.3464 7.14962   2
   1   5  14 100.206 6.16059   5
   1   5  14 85.5398 5.91285   7
   1   5  14 117.076 7.61820  10
  -1  -5 -14 94.9392 6.32650   5
  -1   5 -14 97.4745 7.23709  10
  -1  -5 -14 87.8384 6.80212   2
  -1   5 -14 96.2844 6.38649  15
   1  -5  14 102.388 8.05034   6
  -1   5 -14 101.350 6.51291   8
   1   5  14 90.6163 5.78217  13
   1  -5  14 90.2394 6.00907  16
  -1   5 -14 96.4504 6.58830   1
   1   5  14 104.949 6.23005   6
   1   5  14 89.1043 6.31410  15
   1  -5  14 81.4407 6.53302  15
   1  -5  14 96.3476 6.80094   8
   1   5  14 111.831 7.12311  17
   1   5  14 107.612 7.76727   4
   1  -5  14 78.1624 6.87939  10
   1  -5  14 83.8924 7.33817   7
   1   5  14 83.7829 6.57982  14
  -1   5 -14 96.6240 6.36733   9
   1  -5  15 50.1542 4.13893   8
  -1   5 -15 40.7316 3.55024   3
   1   5  15 40.3321 2.85517  13
  -1   5 -15 45.4759 3.80599   1
   1  -5  15 40.3573 3.11932  16
   1  -5  15 38.2634 3.80825  15
   1   5  15 42.3928 2.90984  16
  -1  -5 -15 47.7842 3.55641   5
  -1  -5 -15 37.6038 3.90142   2
   1   5  15 40.2664 3.02486   7
   1   5  15 45.5170 3.20697   5
  -1   5 -15 44.8728 4.47980  10
  -1   5 -15 47.2464 3.59583   8
  -1   5 -15 43.1712 4.22997   2
   1  -5  15 48.5343 5.23752   6
   1   5  15 35.5065 3.35156  15
   1  -5  15 40.1059 4.30462   4
   1   5  15 46.1507 4.18565   2
   1  -5  15 33.5424 4.34802   7
   1   5  15 37.6121 3.76098  14
  -1   5 -15 47.2541 3.26629  16
   1  -5  16 25.5541 3.20109   8
  -1   5 -16 31.8415 2.59035  16
   1   5  16 25.0175 2.29386   7
  -1  -5 -16 26.6019 2.70715   5
   1  -5  16 31.9404 4.11139   7
  -1   5 -16 33.5794 3.96732  10
   1   5  16 28.2050 3.21035  14
  -1   5 -16 37.8627 2.40659  11
   1   5  16 25.8925 2.14899  13
  -1   5 -16 30.3244 3.15443   1
  -1   5 -16 35.4823 3.85780   2
  -1  -5 -16 33.0336 3.62471   2
   1   5  16 25.3524 2.78566  15
   1  -5  16 28.7272 3.16630  15
   1   5  16 26.9853 2.17520  16
   1   5  16 31.3029 2.51068   5
   1  -5  16 28.0463 4.69814   6
   1   5  17 18.9204 2.89287  14
   1   5  17 23.1705 2.23526   7
   1  -5  17 20.3789 2.80672   8
  -1   5 -17 26.4376 2.95005   1
   1  -5  17 20.0459 2.82578  15
  -1   5 -17 12.7405 3.34885  10
  -1   5 -17 32.5930 2.81475   5
  -1  -5 -17 15.6009 2.95461   2
  -1   5 -17 18.5825 3.35703   2
  -1  -5 -17 19.0849 2.43567   5
  -1   5 -17 22.0237 2.20410  16
   1  -5  17 17.9919 3.91965   7
   1  -5  18 17.8577 2.70684   8
   1  -5  18 11.3839 2.63309  15
  -1   5 -18 21.2557 2.51431   5
   1   5  18 17.0040 1.70090  13
   1  -5  18 15.8858 3.60868   7
   1   5  18 18.3066 2.49847  15
  -1   5 -18 21.3953 2.79286   1
  -1  -5 -18 14.1471 2.81713   2
  -1   5 -18 22.9640 3.92291  10
   1   5  18 15.6006 2.77631  14
   1  -5  18 17.5664 2.56233  14
  -1   5 -18 16.2050 1.99544  16
   1  -5  19 26.2644 3.47591  15
   1  -5  19 26.6354 4.47535   7
   1  -5  19 23.7649 3.30299  14
   1  -5  19 27.5116 3.33328   8
  -1   5 -19 41.7281 3.35279   5
   1   5  19 29.6914 3.36107  15
  -1   5 -19 27.0248 4.29668   2
  -1   5 -19 36.0052 2.83359  16
  -1  -5 -19 32.4100 4.06710   2
  -1   5 -19 25.5029 3.21851   1
  -1  -5 -20 11.6344 2.95244   2
   1  -5  20 2.49808 3.47304   7
  -1   5 -20 6.34988 2.11742   5
   1   5  20 11.0069 2.71312  14
   1  -5  20 6.84533 2.37698   8
   1  -5  20 7.90201 4.61054   6
   1  -5  20 11.2346 2.80936  14
  -1   5 -20 8.45714 3.36306   2
   1  -5  20 6.39219 2.48395  15
  -1   5 -20 11.4861 3.82889  10
   1   5  20 11.6283 2.56870  15
  -1   5 -21 27.8113 4.39978  10
   1  -5  21 12.3639 4.28975   7
   1   5  21 26.4888 3.20001  15
   1  -5  21 21.8986 3.41050  14
   1  -5  21 14.4718 4.75343   6
   1   5  21 24.7253 3.61088  14
  -1  -5 -21 19.3605 3.70103   2
   1  -5  21 23.7117 3.45731  15
  -1   5 -21 27.3033 4.37384   2
   1   5  22 4.58099 2.32044  15
  -1  -5 -22 5.38799 3.06048   2
   1  -5  22 4.74102 3.96192   7
   1  -5  22 5.60339 2.70683  14
  -1  -6  22-0.33204 2.42865  14
  -1   6  22 3.99632 2.67101  14
   1   6 -22-0.52864 3.55129  10
  -1  -6  22 0.57542 3.71957   7
  -1   6  21 30.3317 3.75150  14
   1  -6 -21 31.5421 4.06566   2
  -1   6  21 24.6501 3.31767  15
   1   6 -21 31.6631 4.58067  10
  -1  -6  21 29.6309 5.11815   7
  -1  -6  21 31.2213 5.52965   6
   1   6 -21 23.9172 4.37576   2
   1   6 -20-0.21857 1.81718   5
  -1  -6  20-1.59172 2.49238   8
   1  -6 -20 0.34529 2.47226   2
  -1  -6  20-1.62639 3.73064   7
  -1  -6  20-3.31202 4.01662   6
  -1  -6  20 1.89163 2.43445  15
   1   6 -20-3.16829 2.40390   1
  -1   6  20-0.25845 1.91018  15
   1   6 -19 33.8117 3.44194   1
  -1   6  19 25.4460 3.51830  14
   1   6 -19 35.7029 4.52114  10
  -1  -6  19 23.0156 4.54720   7
   1   6 -19 30.9242 2.67701  16
   1   6 -19 38.0709 4.47201   2
  -1   6  19 26.0748 2.28828  13
  -1   6  19 25.5141 3.03398  15
  -1  -6  19 27.1256 3.43507  15
  -1   6  18 1.43819 1.93230  14
  -1  -6  18-4.80690 3.58767   6
  -1  -6  18-0.83782 2.08451  15
  -1   6  18-2.27760 1.87778  15
   1   6 -18-0.85265 2.77399  10
   1   6 -18 0.40267 2.46009   2
  -1  -6  18-2.51807 2.98348   7
   1  -6 -18 0.30946 2.06600   2
   1   6 -18-0.27230 2.12198   1
   1   6 -18 0.56408 1.35226  16
  -1  -6  18 0.94328 2.47254   8
  -1   6  17 60.3819 5.31457  14
  -1  -6  17 70.8177 5.73968   8
  -1   6  17 74.7535 5.01546   6
  -1  -6  17 55.6153 5.13321  15
  -1  -6  17 68.8490 6.63004   7
  -1   6  17 67.4870 5.07827  15
   1   6 -17 68.9124 5.97754   2
  -1   6  17 66.1597 4.41913  13
   1   6 -17 67.0840 5.43828   1
   1   6 -17 70.1761 4.72526  16
   1  -6 -17 61.4531 5.49108   2
   1   6 -17 72.9724 6.25715  10
  -1  -6  16 1.72113 1.73225  15
   1   6 -16 6.70022 2.37657   2
   1   6 -16 2.55494 2.08035   1
   1   6 -16 5.85612 1.41800  16
  -1   6  16 1.42470 1.35045   7
   1  -6 -16 1.10458 1.87626   2
  -1   6  16 3.26731 1.82887  14
  -1   6  16 2.14909 1.58230  15
  -1   6  16 3.78977 2.23945   2
  -1   6  16 4.74410 1.06808  13
  -1  -6  16 2.33025 3.07801   7
  -1  -6  16 3.35682 2.35283   8
  -1   6  16 1.95427 0.87369  16
  -1   6  16 4.18686 1.54322   6
  -1   6  16 4.23770 1.22998   5
  -1  -6  16 7.58046 3.41057   6
  -1  -6  16 5.59098 2.40573   4
   1   6 -16 3.78801 2.88957  10
   1   6 -15 56.3822 4.19169   8
  -1  -6  15 40.4491 4.30002   8
  -1   6  15 56.9820 3.61696   5
  -1   6  15 49.0346 3.37048  13
  -1  -6  15 37.9753 4.31236   4
   1  -6 -15 47.3114 4.27959   2
   1   6 -15 51.9451 3.61316  16
  -1   6  15 47.4634 3.71086   7
   1   6 -15 52.4843 4.05085   9
  -1   6  15 54.7727 4.44430   2
   1   6 -15 50.3307 4.74527  10
  -1  -6  15 39.1961 5.00569   7
  -1  -6  15 47.2249 3.51563  16
  -1  -6  15 48.1716 5.32656   6
  -1   6  15 43.3007 4.02704  14
   1   6 -15 57.0105 4.33324   1
  -1   6  15 45.8426 3.29030   8
   1   6 -15 54.0272 4.09434   3
  -1   6  15 53.4207 4.80702  17
  -1   6  15 51.3545 3.94347   6
  -1   6  15 45.9681 3.84804  15
  -1  -6  14 12.0097 2.52765   8
  -1   6  14 10.7736 3.07222   4
  -1   6  14 8.95327 2.78764  10
  -1   6  14 9.05557 1.19621   3
   1   6 -14 12.2153 1.76882  15
   1   6 -14 10.1968 2.36198   2
  -1   6  14 12.4769 0.90630  12
  -1  -6  14 6.09924 2.25982   4
   1   6 -14 13.3715 2.22136   1
  -1   6  14 9.97166 2.49896  17
  -1   6  14 10.2857 1.53851   5
   1   6 -14 7.82188 1.85962   9
  -1  -6  14 9.68931 3.10633   6
  -1  -6  14 6.82332 2.92789   7
  -1   6  14 11.7321 1.28169  13
   1  -6 -14 6.85637 1.98516   2
   1   6 -14 10.9860 1.61459  16
   1   6 -14 13.2080 2.05251   3
  -1   6  14 11.3936 1.73940   6
  -1   6  14 11.0704 1.00617   9
  -1  -6  14 8.87761 2.46455  10
  -1   6  14 9.32219 1.96855  14
  -1   6  14 10.0362 1.63474   7
  -1   6  14 14.1705 2.33391   2
  -1   6  14 8.26018 1.26838   8
   1   6 -14 9.64601 2.05841   8
   1   6 -14 11.0028 2.65606  10
  -1   6  14 8.29817 1.57619  15
  -1  -6  14 9.31013 1.85326  15
  -1  -6  14 9.66902 1.51117  16
   1   6 -13 46.4794 3.83035   1
   1   6 -13 45.5584 3.71179   8
  -1   6  13 43.9122 2.86738   9
  -1  -6  13 49.6585 4.28914   8
  -1   6  13 39.9431 3.24193   7
  -1   6  13 37.2561 3.46083  14
  -1   6  13 44.9825 2.92307  13
   1   6 -13 43.9518 3.23121  16
  -1  -6  13 42.9034 4.09945  10
  -1  -6  13 39.8792 3.80589   4
   1   6 -13 42.2904 4.22716  10
  -1   6  13 36.8063 3.01792   8
  -1   6  13 41.4935 3.15836   5
  -1  -6  13 40.3210 3.51306  15
  -1   6  13 43.9427 2.99141   3
  -1   6  13 44.2781 3.86012   2
  -1  -6  13 44.3216 4.82632   6
  -1   6  13 46.7126 4.47532   4
  -1   6  13 45.5303 3.40209   6
   1   6 -13 44.5115 4.04838   2
  -1   6  13 39.2603 3.26903  15
   1   6 -13 42.3798 3.30682  15
   1   6 -13 38.7103 3.49046   9
  -1   6  13 44.0956 4.04829  17
  -1   6  13 48.4502 4.38607  10
   1   6 -13 44.4310 3.62146   3
  -1  -6  13 37.1513 3.06675  16
   1   6 -12 4.32484 2.11976  10
  -1   6  12-1.22762 1.31627   7
  -1   6  12 0.78749 0.72799  13
  -1  -6  12-1.27596 1.36788  15
  -1   6  12-0.49400 1.18116   5
   1   6 -12 1.89070 1.84805   2
   1   6 -12 1.51329 1.39110   9
  -1   6  12 0.63152 2.21113   4
   1   6 -12-0.85798 1.67953   1
  -1  -6  12-0.87679 1.54395   4
  -1   6  12 1.44303 0.89696   9
  -1   6  12 1.00310 0.93305   3
  -1   6  12 0.81663 2.17906  10
  -1  -6  12 0.83363 1.80847   8
  -1   6  12 2.34416 1.72823   2
  -1   6  12 0.13827 1.07828  15
   1   6 -12 1.41222 1.06939  16
   1   6 -12 2.17373 1.20477  15
  -1   6  12 1.47087 1.25087  14
  -1  -6  12 0.41083 1.10635  16
   1   6 -12 1.82496 1.52152   8
  -1   6  12-0.24613 1.81902  17
  -1  -6  12 6.45893 2.74610   6
  -1  -6  12 0.25822 1.87890  10
   1   6 -12 1.10914 1.56757   3
  -1   6  12-0.30844 1.34787   6
   1   6 -12 0.94711 1.14771  13
  -1   6  12 1.01384 1.06764   8
   1   6 -11 109.167 7.21973  10
  -1  -6  11 86.5594 7.56031   6
  -1   6  11 98.5865 6.44119   6
  -1   6  11 103.923 6.76526   2
   1   6 -11 104.227 6.27539  16
  -1   6  11 111.216 7.37379   4
  -1   6  11 90.7006 6.25355  15
  -1   6  11 100.450 6.00083  13
  -1  -6  11 86.1759 6.11422  16
   1   6 -11 99.0054 6.27066  15
  -1   6  11 89.5645 6.12113   9
   1   6 -11 98.2365 6.62586   3
   1   6 -11 93.1704 6.62307   9
  -1   6  11 94.5030 6.50132  14
  -1  -6  11 87.1872 6.59244   4
  -1   6  11 99.6600 6.90573  17
  -1   6  11 107.247 5.92554  11
  -1   6  11 85.3236 6.29690   7
   1   6 -11 106.164 6.35125  13
  -1  -6  11 92.4790 6.48698  15
   1   6 -11 99.8128 6.71237   8
  -1  -6  11 94.0920 7.00721   8
  -1   6  11 102.505 6.34141   5
  -1   6  11 107.307 7.11677  10
  -1  -6  11 96.9574 6.95561  10
  -1   6  11 97.8922 6.23237   3
  -1   6  11 91.7706 6.22807   8
   1   6 -11 94.1445 6.69348   1
  -1   6  10 63.4751 4.30605   3
  -1  -6  10 57.0597 4.49718   4
   1   6 -10 63.2473 4.64231   1
  -1   6  10 59.9374 4.38980   6
  -1  -6  10 74.9132 4.71717   9
  -1  -6  10 63.1750 4.86236  10
   1   6 -10 71.7896 4.76923   8
  -1   6  10 54.9123 4.35338  14
  -1  -6  10 58.1552 5.38479   6
   1   6 -10 68.9494 4.99808  10
  -1   6  10 67.8324 3.96048  13
   1   6 -10 58.1864 4.59207   3
  -1  -6  10 55.9134 4.93272   8
   1   6 -10 63.3645 4.21093  15
   1   6 -10 65.8798 4.71882   9
   1   6 -10 67.9152 4.24240  16
  -1  -6  10 60.0859 5.35490   7
  -1   6  10 71.0167 4.76366   2
  -1   6  10 65.9674 4.23970   9
  -1   6  10 55.1302 3.75843   1
  -1   6  10 69.9173 4.84683  17
  -1   6  10 59.7875 4.31686   7
  -1   6  10 59.5245 5.04159   4
  -1   6  10 54.4901 4.15188  15
  -1   6  10 56.1897 4.24969   5
  -1  -6  10 55.3735 4.36544  15
   1   6 -10 61.5262 4.23809  13
  -1  -6  10 59.1389 4.12726  16
  -1   6  10 55.1759 4.22049   8
  -1   6  10 72.9266 3.97235  11
  -1   6  10 70.7679 4.99318  10
  -1  -6   9 44.3164 3.89118   8
   1   6  -9 42.2024 2.99372  15
  -1   6   9 46.4174 2.86606  16
   1   6  -9 36.8496 3.34961   3
   1   6  -9 40.3209 3.48522   9
  -1  -6   9 37.7693 2.93117  16
  -1  -6   9 40.2473 3.29480   4
  -1  -6   9 36.4471 4.04348   7
  -1   6   9 44.0498 3.70518  10
  -1  -6   9 42.7544 4.16467   6
  -1   6   9 39.3861 3.13604   8
  -1   6   9 37.7539 2.71573   1
  -1   6   9 36.1981 2.91276  15
   1   6  -9 49.1288 3.17762  13
  -1   6   9 41.0201 3.13673   3
   1   6  -9 40.6607 3.66559  10
  -1   6   9 34.6458 3.06117  14
  -1   6   9 41.0836 3.49840  17
   1   6  -9 43.9999 3.06376  16
  -1   6   9 38.6609 3.14557   5
  -1   6   9 43.2921 3.25403   6
  -1   6   9 44.6690 2.79598  13
   1   6  -9 44.2730 3.57432   8
   1   6  -9 42.2653 3.44359   1
  -1   6   9 33.0467 3.10138   7
  -1  -6   9 43.9603 3.49245   9
  -1   6   9 42.2480 3.75139   4
  -1   6   9 39.5002 3.10863   9
  -1   6   9 46.9049 3.53796   2
  -1   6   8 12.5392 1.22151  16
  -1   6   8 11.5454 1.58895   7
  -1  -6   8 15.4255 1.70337   4
  -1   6   8 12.5910 1.31137  15
   1   6  -8 10.2657 1.82253   3
  -1   6   8 11.9203 1.44947  14
  -1   6   8 9.14722 1.47110   8
  -1   6   8 11.3576 1.50095   9
  -1  -6   8 12.9924 2.51798   6
  -1   6   8 14.1548 1.86647   2
   1   6  -8 10.0105 1.40372  16
   1   6  -8 11.8896 1.81847   8
  -1  -6   8 12.1033 1.33192  16
  -1  -6   8 15.5017 1.94136   9
  -1   6   8 19.0186 1.39793  11
   1   6  -8 11.9777 2.04637  10
  -1   6   8 13.9797 1.99352  10
   1   6  -8 12.8707 1.33080  15
  -1   6   8 13.1929 1.15640  13
  -1   6   8 11.9834 1.55971   6
   1   6  -8 12.8876 1.93366   9
  -1   6   8 13.3742 1.67955   5
  -1   6   8 13.5069 1.81974  17
  -1   6   8 13.2690 1.18356   1
  -1   6   8 12.3900 1.58012   3
  -1  -6   8 8.65379 2.22156   7
   1   6  -8 12.0736 1.70807   1
  -1   6   8 11.1347 2.04155   4
   1   6  -8 10.7459 1.69524   4
  -1  -6   7 76.3525 6.34883   6
  -1   6   7 81.3501 5.63515   5
   1   6  -7 91.7914 5.51154  16
  -1   6   7 80.9806 5.66819   7
  -1   6   7 71.6349 5.59369   6
  -1   6   7 88.6303 5.81750   2
  -1   6   7 73.9466 5.27180   1
   1   6  -7 86.0338 5.36083  15
   1   6  -7 76.8277 5.83075   8
  -1   6   7 88.6966 5.67279   3
  -1   6   7 87.3633 5.91437   4
  -1  -6   7 84.8418 5.39275  16
   1   6  -7 91.5041 5.98806  10
  -1   6   7 82.6327 5.47931  14
  -1   6   7 90.4735 5.32760  16
   1   6  -7 82.8218 5.64446   4
  -1   6   7 83.6168 5.33175  15
   1   6  -7 79.4457 5.77667   1
  -1   6   7 88.9077 5.84761  17
  -1   6   7 73.7850 5.55476   9
  -1   6   7 89.3735 5.26090  13
  -1   6   7 83.5504 5.62818   8
  -1   6   7 95.4470 5.88941  10
  -1  -6   7 82.5739 6.43654   7
  -1  -6   7 85.0032 5.53057   4
   1   6  -7 85.6355 5.88749   9
  -1   6   7 112.163 5.41605  11
   1   6  -7 79.9116 5.74742   3
  -1  -6   7 83.1685 5.83086   9
  -1  -6   6 7.32481 0.92404  14
  -1   6   6 7.07173 1.40856   6
  -1   6   6 5.46619 1.39223  17
  -1   6   6 5.98079 0.99163  14
  -1   6   6 7.53925 0.95975  16
  -1  -6   6 6.65136 1.66523   7
  -1  -6   6 7.07825 1.06601  15
  -1   6   6 5.86134 1.34762  10
   1   6  -6 5.18553 1.49569   9
  -1  -6   6 6.79528 1.09216   4
  -1   6   6 4.38980 1.24652   9
   1   6  -6 6.63134 1.40660   8
  -1   6   6 4.13028 1.24161   5
   1   6  -6 5.95222 1.39587   1
  -1   6   6 5.43604 0.95847   1
   1   6  -6 3.90278 1.10392   4
   1   6  -6 4.35623 1.39972   3
   1   6  -6 5.14059 0.83595  15
  -1   6   6 5.15015 1.15555   3
  -1   6   6 7.88086 1.34781   8
   1   6  -6 5.41437 0.98149  16
  -1   6   6 5.54770 1.43142   4
  -1  -6   6 8.92809 1.97643   6
   1   6  -6 12.3506 1.78400  10
  -1   6   6 5.28196 0.81608  15
  -1   6   6 6.10609 1.34837   7
  -1   6   6 4.60816 1.37549   2
   1   6  -5 215.229 14.6351  13
   1   6  -5 239.618 15.0633   8
  -1   6   5 264.774 14.8965   4
  -1   6   5 269.197 15.0022   2
  -1   6   5 271.982 14.9009  10
  -1   6   5 238.344 14.9289   6
  -1   6   5 233.030 14.5825  14
  -1   6   5 249.048 14.8612   5
  -1  -6   5 234.180 14.5856   4
  -1   6   5 229.569 14.9483   7
  -1   6   5 231.424 14.8832   8
   1   6  -5 263.666 15.0396  10
   1  -6  -5 273.284 14.7741   6
  -1  -6   5 254.187 14.6446  15
   1   6  -5 244.160 14.9925   3
   1   6  -5 257.029 14.9779   1
   1   6  -5 256.792 14.6904  16
   1   6  -5 241.262 14.4932  15
   1   6  -5 248.365 14.6485   4
  -1  -6   5 245.102 14.5148  14
  -1   6   5 247.165 14.8922   3
  -1  -6   5 252.387 15.3273   8
  -1   6   5 248.514 14.5723  16
  -1   6   5 250.469 14.9366  17
  -1   6   5 240.993 14.8952   9
  -1  -6   5 245.252 15.5639   7
   1   6  -5 232.664 15.0274   9
  -1   6   5 233.071 14.5887   1
  -1   6   4 8.83895 1.25893  10
  -1   6   4 8.37959 1.21739   4
   1   6  -4 5.88475 1.05423  13
  -1   6   4 9.26691 1.34913  17
  -1   6   4 8.66117 0.93907  14
   1  -6  -4 8.65835 1.20263   6
  -1  -6   4 7.77868 1.32232  17
  -1   6   4 4.79124 1.25328   8
  -1   6   4 4.61318 1.36779   7
   1   6  -4 5.64972 0.88867   4
  -1   6   4 6.29149 0.94073  16
  -1  -6   4 5.04710 1.47369   9
   1   6  -4 6.18252 1.46117   9
   1   6  -4 8.34001 1.40840   1
  -1   6   4 4.77199 1.01154   1
  -1  -6   4 6.58076 0.89263  15
  -1   6   4 5.25857 1.31449   2
   1   6  -4 8.09770 1.49350   8
  -1   6   4 6.24640 1.36831   6
  -1  -6   4 6.49442 0.82030  14
   1   6  -4 6.39550 1.50833   3
  -1   6   4 5.91007 1.38382   3
   1   6  -4 5.64752 1.33548  10
  -1   6   4 6.50830 1.29389   5
  -1   6   4 5.18801 1.38460   9
   1   6  -4 7.13848 0.81084  15
   1   6  -3 94.3522 6.08227   3
  -1   6   3 89.6176 6.18465   7
   1   6  -3 91.9936 6.13975   8
  -1   6   3 93.1894 6.13803   6
   1   6  -3 102.900 6.06326  10
   1   6  -3 91.5829 6.36010   7
  -1  -6   3 89.7022 5.77326  17
  -1  -6   3 89.8301 5.54745  14
   1   6  -3 88.5308 6.10325   9
  -1   6   3 105.364 6.00496   5
   1  -6  -3 90.9367 5.70160  17
  -1   6   3 83.7807 5.52412  14
  -1   6   3 79.3900 5.87778  17
  -1   6   3 95.2322 5.76778   1
   1   6  -3 88.0484 5.48529  15
   1  -6  -3 93.6314 5.96543   6
  -1   6   3 91.7406 6.05333   9
   1   6  -3 90.8340 5.52435   4
  -1   6   3 100.715 5.84221  10
  -1   6   3 88.1676 5.97915   3
  -1   6   3 91.4907 5.69516   4
  -1   6   3 93.1845 5.68208  16
  -1   6   3 86.4186 6.07102   8
  -1  -6   2 46.6442 2.97080  17
  -1   6   2 46.6614 2.83061  14
  -1   6   2 42.6460 3.57435   6
  -1   6   2 43.3789 3.38018   3
  -1   6   2 49.3459 3.20099   1
  -1   6   2 40.8435 3.28487  17
   1   6  -2 39.4976 2.80408  15
  -1   6   2 47.0446 2.88132   4
  -1   6   2 45.2665 3.07374  16
  -1   6   2 45.3046 3.63986   7
  -1   6   2 45.6282 3.53358   8
   1   6  -2 47.0611 2.84361   4
   1  -6  -2 46.3689 3.07170  17
  -1   6   2 46.4678 3.47691   9
   1   6  -2 48.4404 3.81159   7
   1  -6  -2 49.3875 3.50253   6
   1   6  -2 48.6980 3.40453  10
   1   6  -2 45.5188 3.54707   3
   1   6  -2 37.1562 3.43695   9
  -1  -6   2 45.1408 2.89630  14
  -1   6   1 210.047 13.7821   7
  -1  -6   1 211.850 13.0949  14
   1   6  -1 249.825 13.0521   4
   1   6  -1 232.772 12.9984  15
   1  -6  -1 214.873 13.7254   6
  -1   6   1 224.341 12.9438  14
  -1   6   1 229.265 13.8272   6
   1   6  -1 211.857 13.7705   7
   1   6  -1 190.862 13.4178   1
  -1   6   1 209.392 13.4701  17
   1  -6  -1 219.340 13.2831  17
  -1   6   1 222.656 13.3617   1
  -1   6   1 198.516 13.5997   8
  -1  -6   1 212.245 12.9979  17
  -1  -6   1 234.801 13.8095   6
  -1   6   1 221.197 13.1650  15
   1   6  -1 235.684 13.6479   3
   1   6   0 71.1850 4.65197   1
   1   6   0 64.2521 4.13944  15
  -1   6   0 64.7389 5.04966   6
   1   6   0 68.9839 4.84661   8
   1  -6   0 74.1945 4.55793  17
  -1   6   0 69.3485 5.08785   7
   1   6   0 71.9762 4.28659   4
  -1  -6   0 70.7504 4.29163  14
   1   6   0 73.4655 4.89513   6
  -1  -6   0 73.3254 4.86349   6
   1   6   0 71.6012 4.29310  14
  -1   6   0 65.0454 4.54838   1
   1   6   0 68.9415 4.95417   7
  -1   6   0 69.1453 4.34502  15
   1   6   1 408.832 24.6975   8
  -1   6  -1 416.801 24.3766  10
  -1   6  -1 405.322 24.2642  15
   1   6   1 393.747 24.6720   9
  -1   6  -1 391.409 24.7309   9
   1  -6   1 417.204 24.5501  17
  -1   6  -1 429.653 24.6903   3
   1   6   1 413.739 24.2539  14
   1   6   1 411.937 24.5154   1
   1   6   1 420.773 24.6877   6
  -1   6  -1 428.725 25.0262   6
  -1   6  -1 407.748 24.9833   7
  -1  -6  -1 442.523 24.2508  14
   1   6   1 409.248 24.7943   7
   1   6   1 413.923 24.0995  15
  -1  -6  -1 397.944 24.6019   6
   1   6   2 133.101 8.06609   4
  -1   6  -2 110.455 8.37165   8
   1  -6   2 143.089 8.35204  17
   1   6   2 139.337 8.37742   3
  -1   6  -2 127.952 8.33001   3
  -1   6  -2 139.301 8.04966  10
   1   6   2 131.829 7.91260  14
   1  -6   2 132.892 7.94352  16
   1   6   2 129.385 8.39157   7
   1   6   2 126.660 7.68314  15
  -1   6  -2 133.632 7.90412  15
  -1   6  -2 138.856 8.75013   6
   1   6   2 129.944 8.29258   8
  -1   6  -2 119.283 8.34971   9
   1   6   2 130.848 8.32564   9
   1   6   2 132.742 8.11294   1
  -1  -6  -2 131.645 8.11833   6
   1   6   2 128.602 8.23966   6
   1   6   2 123.518 7.93206  17
   1   6   2 140.279 8.30007   5
   1   6   3 92.0735 6.56382  15
   1  -6   3 107.622 6.52102  14
   1   6   3 108.918 7.15367   9
   1   6   3 123.264 7.10865   4
   1   6   3 113.774 7.14499   8
  -1   6  -3 118.130 7.30454   9
  -1  -6  -3 115.570 6.88293   6
   1   6   3 115.468 7.15471   5
  -1  -6  -3 107.893 7.09915   7
   1   6   3 116.585 6.95265   1
  -1   6  -3 110.463 6.77705  15
   1   6   3 106.839 6.85779  17
   1   6   3 108.248 6.81004  14
   1   6   3 101.635 7.15754   7
   1   6   3 117.989 6.83826  16
   1  -6   3 110.847 7.32336  17
   1  -6   3 119.692 6.83336  16
  -1   6  -3 117.732 7.21188   3
   1   6   3 108.737 7.05337   6
  -1   6  -3 112.896 7.35694   8
   1   6   3 127.719 7.40870   2
  -1   6  -3 127.888 6.99559  10
  -1   6  -3 112.499 7.06686   1
   1   6   3 115.393 7.19382   3
   1  -6   3 124.095 7.75655   7
   1   6   4 70.9592 5.30450   7
  -1   6  -4 75.3747 5.30155   1
   1  -6   4 78.1820 5.72511  17
  -1   6  -4 79.7961 5.53337   9
   1   6   4 88.1478 5.49718  10
   1   6   4 83.2336 5.13833   1
   1  -6   4 77.0325 4.81298  14
   1   6   4 79.1939 4.83922  15
   1  -6   4 83.5009 6.05433   7
   1  -6   4 78.5792 5.04632  16
   1   6   4 76.0025 5.22290   6
   1   6   4 71.4379 5.25816   8
  -1   6  -4 88.6643 5.31502  10
   1   6   4 81.3888 5.38789   4
  -1   6  -4 80.7800 5.59882   8
   1   6   4 78.8369 5.37913   5
  -1  -6  -4 87.5363 5.05094   6
   1   6   4 79.2584 5.38667   3
   1   6   4 81.0920 5.15792  17
   1   6   4 80.3494 5.10824  14
   1  -6   4 74.9253 4.84214   4
   1   6   4 86.2602 5.56545   2
  -1   6  -4 81.9251 5.04155  15
  -1  -6  -4 92.0109 5.29551   7
   1   6   4 71.5311 5.29816   9
   1  -6   4 83.1752 5.75993   8
  -1   6  -5 94.7039 6.29340  10
   1   6   5 95.5221 6.38066   5
  -1   6  -5 91.2577 6.84422   7
   1   6   5 107.198 6.25219  17
  -1   6  -5 90.9934 6.34499   1
  -1   6  -5 92.9394 6.56622   8
   1   6   5 104.387 6.43087   3
  -1   6  -5 104.976 6.12892  16
   1  -6   5 98.2660 7.11650   6
   1   6   5 86.0833 6.15396   6
   1  -6   5 98.9990 5.96061   4
   1   6   5 91.7776 6.13624  14
   1   6   5 90.5165 6.23153   8
   1   6   5 91.4536 6.27076   7
   1  -6   5 86.4437 6.92342   7
   1   6   5 94.4278 6.06207   1
   1   6   5 95.4892 5.87513  15
   1   6   5 107.182 6.54490   4
   1   6   5 92.0043 6.27731   9
   1   6   5 99.5429 6.53602   2
   1   6   5 108.266 6.54769  10
  -1   6  -5 96.6371 6.04308  15
  -1   6  -5 96.0337 6.53481   9
  -1  -6  -5 104.862 6.15205   7
  -1   6  -6 26.9998 2.63808   1
   1   6   6 37.0281 2.94095   2
  -1   6  -6 33.0907 2.39657  15
   1   6   6 29.7277 2.52133   7
   1   6   6 29.3915 2.88080  10
   1   6   6 32.9757 2.19854  15
  -1   6  -6 27.3129 2.81996   9
   1  -6   6 33.9057 2.39542   4
  -1   6  -6 30.0059 2.68074  10
   1   6   6 35.8915 2.95141   4
   1   6   6 33.2345 2.58160  17
   1   6   6 31.3206 2.54112   9
   1   6   6 31.5383 2.51062   8
  -1   6  -6 24.9856 3.11251   7
   1   6   6 30.2240 2.30501   1
  -1   6  -6 29.7444 2.88323   8
   1   6   6 33.4294 2.11036  13
   1   6   6 33.2119 2.72121   3
   1  -6   6 35.4076 3.54890   6
   1   6   6 29.0530 2.67110   5
  -1   6  -6 32.7011 2.38661  16
   1   6   6 26.8156 2.44242  14
   1  -6   6 29.4041 3.25794   7
  -1   6  -6 27.9975 2.43137  13
   1   6   6 29.1265 2.47156   6
  -1   6  -7 154.050 9.31531   2
   1   6   7 150.356 8.60360   1
  -1   6  -7 159.571 9.71046   7
   1  -6   7 146.312 9.08469  10
   1   6   7 134.631 8.80214   9
   1   6   7 141.737 9.00117   5
   1  -6   7 126.981 9.65169   7
   1  -6   7 131.304 9.84276   6
   1   6   7 133.726 8.83326   7
   1   6   7 163.991 9.41169  10
  -1   6  -7 152.662 8.78969  16
  -1   6  -7 139.653 9.22007   8
  -1   6  -7 132.814 9.14504   9
  -1   6  -7 138.726 8.82528  13
   1   6   7 132.901 8.79268   6
  -1   6  -7 159.861 9.21539  10
  -1   6  -7 133.663 9.00162   1
   1   6   7 159.614 9.43191   4
   1   6   7 137.909 8.88590  14
   1   6   7 149.238 8.46717  13
  -1   6  -7 145.754 8.77515  15
   1   6   7 136.179 8.96056   3
   1   6   7 129.727 8.76735   8
   1   6   7 136.124 8.59122  15
   1   6   7 152.938 9.03499  17
   1  -6   7 121.247 8.75368   4
   1   6   7 158.948 9.35543   2
  -1   6  -8 41.8888 3.06559  15
  -1   6  -8 44.1367 3.55844  10
  -1   6  -8 41.7149 3.04258  16
   1   6   8 49.3777 3.84320   4
  -1   6  -8 39.5965 3.10843  13
   1   6   8 37.4935 3.07806   7
   1   6   8 43.5970 3.25062   3
   1  -6   8 41.8612 2.98929  16
   1   6   8 49.9894 3.78632  10
   1   6   8 43.8936 3.25722  14
   1  -6   8 48.0969 3.90453   8
   1   6   8 43.3819 3.07728   9
  -1   6  -8 39.9237 3.32894   1
   1   6   8 41.0079 2.74790   1
   1   6   8 42.3081 3.35414  17
   1   6   8 36.4850 2.88337  15
   1   6   8 45.4538 3.32641   5
   1   6   8 42.1263 2.69685  13
  -1   6  -8 44.0043 3.58472   9
   1  -6   8 40.1333 4.24854   6
  -1   6  -8 47.9402 4.02508   7
   1  -6   8 44.7261 4.21166   7
   1   6   8 45.0546 3.64868   2
   1   6   8 40.5167 3.09406   6
  -1   6  -8 46.8816 3.61456   8
   1  -6   8 35.1487 3.13348   4
   1   6   8 41.5728 3.03842   8
   1  -6   8 37.4748 3.42467  10
   1   6   9 42.7210 3.31482   3
  -1   6  -9 44.4493 3.22799  15
   1   6   9 48.3404 3.45219   5
   1   6   9 39.3839 3.05640  15
  -1   6  -9 43.0392 3.77748  10
   1   6   9 40.8527 3.37470  14
  -1   6  -9 47.0194 3.76056   8
   1  -6   9 39.4320 3.07300  16
   1   6   9 46.9571 2.83268  13
   1   6   9 43.5436 2.77320   1
   1  -6   9 42.1232 3.47748   4
  -1   6  -9 35.9651 3.54954   9
   1   6   9 40.0252 3.20865   6
   1  -6   9 40.7430 4.39810   6
   1   6   9 40.7813 3.18855   7
   1  -6   9 40.2798 3.59153  10
   1   6   9 51.6202 3.94641   2
  -1   6  -9 45.7486 3.19562  16
   1   6   9 39.1355 3.10050   8
  -1   6  -9 42.4740 3.53585   1
  -1   6  -9 41.3164 3.25823  13
   1   6   9 57.6231 3.00521  11
   1  -6   9 46.2621 3.47185  15
   1   6   9 51.7790 4.12061   4
   1  -6   9 43.9265 3.96584   8
   1   6   9 42.4412 3.11066   9
   1   6   9 46.5298 3.98061  10
   1   6   9 44.1956 3.50219  17
   1   6  10 30.1214 2.33578   9
   1  -6  10 30.3366 2.41708  16
   1   6  10 24.2898 2.73608  17
   1   6  10 44.6565 2.33673  11
   1   6  10 30.3924 2.67219   5
  -1   6 -10 32.6961 2.60865  15
   1  -6  10 32.9737 2.82377  15
   1   6  10 24.5729 2.38348  15
   1   6  10 28.9514 2.44962   7
   1   6  10 26.7800 2.28391   8
  -1   6 -10 30.2597 2.89051   9
   1   6  10 29.0890 2.51356   6
  -1   6 -10 31.2383 3.19978  10
   1   6  10 29.8992 2.07441  13
   1   6  10 35.3547 3.45755  10
   1  -6  10 26.3859 3.75615   6
  -1   6 -10 34.9861 2.58637  13
  -1   6 -10 34.4939 2.53470  16
  -1  -6 -10 30.9550 2.68172   5
   1   6  10 24.5852 2.70035  14
   1  -6  10 27.8413 2.85327   4
   1  -6  10 29.5529 3.01024  10
   1   6  10 29.2887 2.53427   3
   1   6  10 35.6236 3.44394   4
   1  -6  10 32.7450 3.29062   8
  -1   6 -10 27.6086 2.81011   1
   1   6  10 36.6791 3.33057   2
  -1   6 -10 28.4110 2.89863   8
   1  -6  11 73.0158 6.21468   6
   1   6  11 68.2662 4.17540  13
  -1   6 -11 63.9527 4.95015   9
   1   6  11 58.0276 4.26593   8
   1   6  11 56.9364 5.28123  10
  -1   6 -11 70.4689 5.04805   1
   1  -6  11 58.7672 4.43876  16
   1   6  11 70.2914 4.71752   5
   1   6  11 59.2825 4.53977   6
  -1   6 -11 67.5623 4.65176  15
  -1   6 -11 67.0320 5.27947  10
   1   6  11 67.0507 4.31508   9
   1  -6  11 58.1517 4.91969   4
   1  -6  11 66.5997 5.31609   8
   1  -6  11 64.2577 5.13174  10
   1   6  11 75.9969 5.17638  17
   1   6  11 55.5051 4.77003  14
   1   6  11 80.5526 4.19180  11
  -1   6 -11 67.0985 4.53956  16
   1  -6  11 67.9681 4.89306  15
  -1  -6 -11 71.9954 4.77460   5
   1   6  11 81.9149 5.85196   4
  -1   6 -11 70.8695 5.04057   8
   1   6  11 64.6049 4.48467   7
   1   6  11 66.0504 4.50980   3
   1   6  11 63.0175 4.53140  15
  -1   6 -11 68.7835 4.61153  13
   1   6  11 72.3243 5.24894   2
   1   6  12 41.7788 3.97457   2
   1   6  12 48.6570 3.26880   3
   1   6  12 43.7000 3.68133  14
  -1  -6 -12 48.0987 3.54870   5
   1  -6  12 40.6904 4.57445   7
   1   6  12 43.8490 2.91071  13
   1   6  12 49.1026 4.51944   4
   1   6  12 47.2048 3.46750   5
   1   6  12 52.0531 4.07565  17
  -1   6 -12 46.1439 3.45149  13
   1  -6  12 48.5186 4.19211   8
   1   6  12 39.5375 3.32472  15
   1   6  12 46.1670 2.79149  11
   1   6  12 40.6364 2.92828   8
  -1   6 -12 50.8608 3.91097   1
   1  -6  12 44.8603 3.26685  16
  -1   6 -12 41.5411 3.40298  15
   1  -6  12 31.4961 4.62418   6
   1   6  12 41.6178 2.94753   9
   1   6  12 52.5151 4.52491  10
   1  -6  12 39.1899 3.87423   4
  -1   6 -12 51.5966 4.38944  10
   1   6  12 36.9936 3.16816   7
  -1   6 -12 45.9349 3.73741   3
   1  -6  12 42.9992 4.05085  10
  -1   6 -12 52.8709 3.91220   8
   1  -6  12 43.1804 3.67718  15
  -1   6 -12 48.1690 3.34681  16
  -1   6 -12 46.3726 3.75900   9
   1   6  12 43.8115 3.37138   6
   1  -6  13 79.5641 6.05300  10
   1  -6  13 77.2590 5.68310  15
  -1   6 -13 82.4107 5.26635  16
   1   6  13 68.1847 5.06399   7
  -1   6 -13 69.6485 5.50776   3
  -1   6 -13 80.9774 5.74624   1
   1   6  13 85.7397 5.97503  17
  -1   6 -13 85.5705 6.28871  10
   1   6  13 77.4966 5.07459   3
  -1  -6 -13 87.5029 5.47796   5
   1   6  13 84.7896 5.35152   5
  -1  -6 -13 79.4937 5.92937   2
   1   6  13 70.3487 5.62715  14
   1   6  13 80.0343 5.30300   6
   1  -6  13 75.4705 5.14193  16
   1   6  13 80.3063 4.77054   9
   1   6  13 80.8938 5.98966   2
   1  -6  13 66.4074 5.79478   4
   1  -6  13 87.0061 7.12533   6
  -1   6 -13 85.1495 5.73811   8
   1   6  13 80.0825 6.60894   4
   1   6  13 81.9355 5.38544  15
  -1   6 -13 81.8037 5.62469   9
   1   6  13 72.8522 4.72839   8
   1  -6  13 79.8116 6.11208   8
   1  -6  13 69.9416 6.56061   7
   1   6  13 74.3227 4.83122  13
  -1   6 -13 80.4364 5.42489  15
   1   6  13 92.1489 6.56198  10
   1  -6  14 32.8178 3.65718   4
  -1   6 -14 44.7087 4.25632  10
   1  -6  14 33.6504 3.66204   8
   1  -6  14 36.6894 3.82610  10
   1   6  14 34.6775 2.43179  13
  -1   6 -14 37.0636 3.30628   8
   1  -6  14 36.2578 2.82654  16
   1   6  14 31.2289 2.67935   7
   1  -6  14 30.6252 3.25971  15
  -1   6 -14 39.7566 3.38091   3
   1   6  14 33.6942 2.89583   5
   1   6  14 30.4130 3.25061  14
   1  -6  14 29.9581 4.19551   7
  -1   6 -14 34.3244 2.89126  16
   1   6  14 37.3543 2.96320   6
  -1  -6 -14 43.0829 3.19296   5
  -1  -6 -14 32.3669 3.50667   2
   1   6  14 34.9554 3.80073   2
   1   6  14 40.5339 3.70314  17
  -1   6 -14 40.3440 3.41514   1
   1  -6  14 36.1323 4.72350   6
  -1   6 -14 33.5995 3.19126   9
   1   6  14 29.0778 2.94891  15
   1   6  14 35.0383 2.62185   3
   1   6  15 27.7134 2.40364   5
  -1  -6 -15 29.6831 2.59591   5
  -1  -6 -15 25.9179 3.13873   2
   1  -6  15 20.1403 4.02363   6
   1   6  15 21.6208 1.79786  13
   1   6  15 20.1774 2.08417   7
  -1   6 -15 23.3273 2.76630   1
  -1   6 -15 20.3505 3.28850  10
  -1   6 -15 26.4937 2.79695   3
   1   6  15 20.0895 2.43614  15
   1  -6  15 22.3992 3.19235   8
  -1   6 -15 26.2920 2.37686  16
   1  -6  15 22.4773 2.82357  15
  -1   6 -15 30.6211 2.91212   8
   1   6  15 26.2323 2.42569   6
   1  -6  15 26.2179 4.09156   7
   1  -6  15 14.3620 3.01008   4
   1   6  15 21.1413 2.85574  14
  -1   6 -16 26.5063 2.49373  16
  -1  -6 -16 25.2014 2.61884   5
  -1  -6 -16 24.2706 3.22962   2
   1  -6  16 28.8058 3.38561   8
  -1   6 -16 27.5251 3.10730   1
   1  -6  16 18.3158 3.77990   7
   1   6  16 20.4329 3.01177  14
  -1   6 -16 27.4688 3.79848   2
  -1   6 -16 21.0546 3.48207  10
   1   6  16 23.7055 1.93508  13
   1  -6  16 28.2965 3.15590  15
   1   6  16 26.4920 2.42594   5
   1   6  16 25.1010 2.67330  15
  -1   6 -16 31.3985 2.32516  11
   1  -6  16 24.0446 4.32872   6
   1   6  16 21.7110 2.45234   6
  -1   6 -17 32.3981 3.52014   1
   1   6  17 27.8700 3.04066  15
   1  -6  17 29.4656 4.94868   6
   1  -6  17 29.1445 4.43924   7
  -1   6 -17 38.7068 2.96130  16
   1  -6  17 26.1420 3.45017   8
   1   6  17 31.6503 3.50385  14
   1  -6  17 35.6152 3.45705  14
   1  -6  17 31.1946 3.61498  15
   1   6  17 31.9165 2.38150  13
  -1   6 -17 36.8751 4.34094   2
  -1  -6 -17 33.1356 3.84095   2
  -1   6 -17 45.3817 4.68603  10
  -1   6 -18 10.5904 2.46973   1
  -1  -6 -18 14.1671 3.07835   2
  -1   6 -18 11.3287 1.85663  16
  -1   6 -18 8.56298 3.11820  10
   1  -6  18 11.3171 2.53461  15
   1  -6  18 11.3043 2.41630  14
   1  -6  18 13.2654 4.26760   6
  -1   6 -18 9.47011 3.23157   2
   1   6  18 7.92408 2.04528  15
   1   6  18 10.4819 2.54297  14
   1  -6  18 12.4037 2.73419   8
  -1   6 -18 17.5140 2.35604   5
   1  -6  18 11.0959 3.57191   7
  -1   6 -19 30.4844 3.54656   1
   1  -6  19 25.8744 3.64101   8
   1  -6  19 37.9212 4.91200   7
  -1   6 -19 35.6495 4.55214   2
   1  -6  19 33.5688 3.52394  14
  -1   6 -19 37.2902 3.41739   5
   1  -6  19 31.1457 3.70190  15
  -1  -6 -19 25.7917 3.85380   2
  -1   6 -19 25.8040 4.43949  10
  -1   6 -19 33.8779 2.96583  16
   1   6  20 30.4494 3.90410  14
  -1   6 -20 35.9047 4.76533  10
   1  -6  20 33.4867 3.77022   8
  -1   6 -20 31.2651 3.44595   5
   1  -6  20 33.9424 3.77388  14
   1   6  20 31.9723 3.53244  15
  -1  -6 -20 24.7939 4.07382   2
   1  -6  20 29.9791 4.78952   7
  -1  -6 -21 8.39173 3.06260   2
   1  -6  21 8.77574 3.97516   7
   1   6  21 4.37332 2.47721  14
   1  -6  21 8.64832 2.82084  15
  -1   6 -21 11.1140 4.08752  10
   1   6  21 9.92786 2.54802  15
   1   6  22 11.7339 2.67680  15
  -1   7  22 21.5771 3.21752  15
  -1  -7  21-0.59387 3.51807   7
  -1   7  21 1.34539 1.97802  15
  -1  -7  21-3.02740 2.53560  15
  -1   7  21 0.34437 2.62116  14
  -1   7  20 14.3624 3.10433  14
  -1  -7  20 24.7948 4.80712   7
   1   7 -20 30.4878 4.38118   2
   1   7 -20 22.8828 3.54908   1
  -1  -7  20 23.6613 3.31124  15
  -1  -7  20 23.3101 3.54023   8
   1   7 -19-0.61713 2.34871   1
  -1  -7  19-2.71523 2.24053  15
  -1  -7  19 0.55982 3.26333   7
  -1  -7  19 0.35207 2.71817   8
   1   7 -19-2.27535 3.14977  10
  -1   7  19-1.84688 2.35423  14
  -1  -7  19-0.66247 3.56546   6
  -1   7  19 0.71665 1.89545  15
   1   7 -19 0.31997 1.56166  16
   1   7 -19 0.90290 2.73741   2
  -1  -7  18 58.2364 6.85762   6
   1   7 -18 67.1267 6.14799   2
  -1   7  18 58.6497 4.82596  15
  -1  -7  18 61.1438 5.67361   8
   1   7 -18 51.2009 5.82359  10
  -1  -7  18 61.7442 6.77385   7
  -1  -7  18 63.5538 5.15185  15
   1   7 -18 72.7546 4.65110  16
  -1   7  18 60.4867 4.14473  13
   1   7 -18 60.6410 5.37513   1
   1   7 -17 8.78137 3.07978   2
   1   7 -17 11.8241 3.38583  10
  -1  -7  17 9.65743 2.66916   8
  -1  -7  17 12.5414 3.80320   7
  -1   7  17 6.86752 1.22101  13
  -1   7  17 8.68045 2.21841  14
  -1  -7  17 4.82894 3.39588   6
  -1   7  17 6.56025 1.15284  16
  -1   7  17 4.18343 1.83950  15
   1   7 -17 6.69768 2.30550   1
  -1  -7  17 7.24494 2.18609  15
   1   7 -17 7.16398 1.73606  16
   1   7 -16 94.0700 6.76604   2
  -1  -7  16 76.7554 6.35723   8
  -1  -7  16 78.0512 7.18567   7
   1   7 -16 87.4149 5.40063  16
   1   7 -16 80.6257 6.68211  10
  -1   7  16 68.8945 4.93407  13
  -1  -7  16 72.3962 7.32736   6
  -1   7  16 63.7330 5.41559  15
  -1   7  16 84.0834 4.97270  16
   1   7 -16 83.4317 6.17863   1
  -1   7  16 73.3943 5.84711  14
  -1   7  15 0.78664 1.53725   6
  -1  -7  15 1.63769 2.99642   6
  -1   7  15 1.73024 0.94365  13
  -1  -7  15 7.68026 2.41937   8
  -1   7  15 0.35755 1.42364  15
  -1   7  15 2.15276 0.99245  16
  -1   7  15 3.70210 1.47149   7
  -1   7  15 2.95472 1.34666   5
   1   7 -15-0.14435 1.40178  16
   1   7 -15 10.1544 2.86704  10
   1   7 -15 5.67574 2.18531   1
  -1  -7  15-2.42292 2.98484   7
  -1   7  15 1.55035 2.20220   2
   1   7 -15 3.14984 2.56219   2
  -1  -7  15 0.94221 1.81413  15
  -1   7  15 3.31854 1.88456  14
  -1  -7  14 42.4597 5.03644   6
  -1   7  14 43.2255 4.42035  10
   1   7 -14 40.0340 3.18237  15
  -1   7  14 46.1538 2.98844   3
  -1   7  14 40.8507 3.88882   2
  -1   7  14 44.7620 3.21209   5
  -1   7  14 35.7616 2.92992   8
  -1   7  14 39.6242 3.26419  15
  -1   7  14 36.7653 3.53457  14
  -1  -7  14 43.8973 3.61846  15
  -1   7  14 41.7888 4.65029   4
   1   7 -14 36.6701 3.57600   3
  -1   7  14 38.3351 2.73814   9
   1   7 -14 39.8323 3.63442   9
  -1   7  14 37.0423 2.76857  13
   1   7 -14 41.7905 4.25019  10
  -1   7  14 40.2061 4.05425  17
   1   7 -14 36.8793 3.75612   1
  -1   7  14 43.7041 2.86812  16
  -1  -7  14 48.6031 4.36238  10
  -1   7  14 30.6236 3.24413   6
  -1   7  14 33.8764 3.18260   7
   1   7 -14 39.3599 3.12425  16
  -1   7  13 16.2168 1.59020   9
  -1   7  13 13.1780 2.46788   2
  -1   7  13 12.5927 1.91532   7
   1   7 -13 15.9442 2.23986   9
  -1  -7  13 15.0367 2.34877   4
  -1   7  13 17.7906 2.80217  17
  -1   7  13 13.0702 1.89891   5
  -1   7  13 12.8623 1.69463   8
   1   7 -13 17.9285 1.91347  15
  -1   7  13 10.6496 2.01848   6
  -1   7  13 15.2250 1.77069   3
  -1  -7  13 17.5117 2.26681  15
   1   7 -13 17.1912 2.49959   1
  -1   7  13 13.9498 1.52282  16
  -1   7  13 20.8964 3.19395  10
   1   7 -13 15.5431 2.30629   3
   1   7 -13 15.5853 2.81192  10
  -1  -7  13 16.0856 1.83125  16
  -1   7  13 14.0515 1.81829  15
  -1   7  13 14.5929 3.06996   4
  -1  -7  13 16.9693 2.96673   8
  -1   7  13 11.2027 2.02513  14
   1   7 -13 16.1667 1.90409  16
  -1   7  13 16.6094 1.48208  13
   1   7 -12 86.9270 6.46362   9
   1   7 -12 98.0220 6.69385   1
  -1   7  12 83.6357 5.87215   9
  -1   7  12 94.1392 6.56782   2
   1   7 -12 94.2905 6.06604  15
   1   7 -12 90.4229 6.05330  16
  -1   7  12 92.8220 6.02582   3
  -1   7  12 90.6852 7.10967   4
  -1   7  12 83.7818 6.26342  14
  -1   7  12 91.6468 6.68782  17
  -1  -7  12 101.736 6.50033   4
  -1   7  12 87.2746 6.23376   6
  -1   7  12 103.574 7.01302  10
  -1   7  12 86.9928 6.00032  15
  -1  -7  12 94.4646 5.95996  16
  -1   7  12 81.4479 5.97923   8
  -1   7  12 82.5446 6.11280   7
   1   7 -12 92.4786 6.44904   3
  -1  -7  12 96.7198 7.01262   8
  -1  -7  12 83.0603 7.50744   6
  -1   7  12 93.6869 5.80528  16
  -1   7  12 99.7245 6.14042   5
  -1   7  12 89.3079 5.70045  13
   1   7 -12 104.662 7.13388  10
  -1   7  12 100.373 5.65897  11
   1   7 -12 90.3612 6.53700   8
  -1  -7  12 91.6235 6.29970  15
  -1   7  11 9.04156 2.12045   2
  -1   7  11 9.35042 1.10156  13
  -1   7  11 10.9974 1.76654  14
  -1   7  11 13.1580 1.65936   5
  -1   7  11 11.5643 1.19275  11
   1   7 -11 15.3936 2.21621   1
  -1  -7  11 9.96472 1.47715  16
  -1   7  11 7.90412 1.52384   3
   1   7 -11 10.1066 2.02297   3
  -1   7  11 9.16560 0.84323   1
  -1  -7  11 10.6840 2.47747   8
  -1  -7  11 8.62412 2.71482   7
  -1   7  11 7.58754 2.46264   4
   1   7 -11 10.9887 2.29893  10
  -1  -7  11 12.2262 1.76873  15
  -1   7  11 9.34053 1.49755   9
  -1   7  11 10.8216 2.43073  10
   1   7 -11 10.7234 1.57649  13
   1   7 -11 10.2468 1.48733  15
  -1   7  11 9.61891 1.77562   6
  -1  -7  11 9.34434 1.76936   4
   1   7 -11 8.54795 1.99719   8
  -1   7  11 7.28929 1.55411   8
  -1   7  11 9.88823 1.30726  16
  -1   7  11 9.53288 1.41060  15
  -1  -7  11 8.78158 2.72253   6
   1   7 -11 9.88490 1.50526  16
  -1   7  11 12.3141 2.11691  17
  -1   7  11 10.1545 1.65687   7
   1   7 -11 7.57608 1.92808   9
  -1   7  10 84.6294 6.28222   7
  -1   7  10 93.9465 5.85927  13
   1   7 -10 97.0736 6.09389  15
  -1   7  10 89.5622 6.69451  10
   1   7 -10 91.8206 6.60115   1
  -1  -7  10 96.1366 6.08215  16
  -1  -7  10 94.2592 6.30200  15
  -1   7  10 79.7556 6.01213  15
  -1  -7  10 106.196 7.81332   6
   1   7 -10 115.535 7.10193  10
  -1   7  10 133.521 6.10876  11
  -1   7  10 103.584 6.75288  17
  -1   7  10 88.6960 5.80270   1
  -1   7  10 84.6098 6.23676  14
  -1   7  10 93.9306 6.40815   6
  -1   7  10 101.935 6.69765   2
  -1   7  10 99.9610 5.97605  16
  -1  -7  10 93.7634 6.34945   4
   1   7 -10 92.1754 6.58849   3
  -1   7  10 99.2153 6.33615   5
  -1   7  10 86.4921 6.23382   8
  -1   7  10 91.9829 6.27923   3
  -1   7  10 97.1711 6.95832   4
  -1  -7  10 82.0991 6.90587   8
   1   7 -10 91.9473 6.64874   8
   1   7 -10 89.7739 6.62178   9
   1   7 -10 105.640 6.23852  16
  -1   7  10 92.7423 6.21165   9
  -1  -7  10 77.8180 7.31004   7
   1   7  -9 4.08653 1.69147   8
  -1   7   9 6.02257 1.28685  11
  -1   7   9 6.06325 1.67447  17
   1   7  -9 4.74167 1.67092   3
  -1   7   9 1.61757 1.63440   2
  -1   7   9 5.00219 1.33964   3
  -1   7   9 4.37241 1.35844   5
  -1   7   9 4.87077 1.44636   6
  -1   7   9 2.60646 1.22025   9
  -1  -7   9 4.88916 2.07529   7
  -1   7   9 3.85164 0.82555  13
  -1   7   9 1.71965 1.59655  10
  -1  -7   9 4.17656 1.12830  16
  -1   7   9 3.95244 1.25353   8
  -1  -7   9 4.11460 1.37527   4
  -1  -7   9 0.86844 2.05102   8
  -1  -7   9 3.57190 1.68989   9
   1   7  -9 4.59926 1.23109  16
   1   7  -9 6.29400 1.70909   1
  -1   7   9 5.92219 1.51165   7
  -1  -7   9 6.99819 2.58919   6
  -1   7   9 5.14950 0.98996  15
  -1   7   9 4.11927 1.19312  14
   1   7  -9 4.03782 1.73808   9
  -1   7   9 5.47252 1.93441   4
   1   7  -9 1.64490 1.73354  10
  -1   7   9 2.94736 0.95421  16
  -1   7   9 2.36376 0.81914   1
   1   7  -9 3.93459 0.97986  15
   1   7  -8 103.446 7.44945   9
  -1  -7   8 115.164 7.05955   4
  -1   7   8 112.791 6.75685  13
   1   7  -8 108.857 7.02127  16
  -1   7   8 110.036 7.40999  17
  -1   7   8 112.733 7.41939   2
  -1   7   8 114.685 7.54628   4
   1   7  -8 110.180 7.47651   3
  -1   7   8 102.794 6.82379  15
  -1   7   8 105.096 7.21415   3
  -1   7   8 104.664 7.25168   7
  -1   7   8 116.770 7.44862  10
  -1   7   8 110.147 6.82840   1
  -1   7   8 146.496 6.98760  11
   1   7  -8 121.651 7.56372   8
  -1  -7   8 109.155 8.22003   6
  -1  -7   8 110.376 8.14392   7
   1   7  -8 104.596 6.85693  15
  -1  -7   8 123.923 7.57710   9
  -1   7   8 107.827 7.19825   8
  -1   7   8 96.5943 7.19262   6
  -1   7   8 101.331 6.99758  14
   1   7  -8 115.263 7.58492  10
  -1   7   8 103.942 7.14390   9
  -1   7   8 107.507 7.19470   5
  -1   7   8 110.307 6.84136  16
   1   7  -8 104.563 7.38834   1
  -1  -7   8 106.235 6.90490  16
   1   7  -7 4.36661 1.63263  10
  -1   7   7 3.98655 1.38075   6
  -1   7   7 2.91413 0.92692   1
   1   7  -7 3.28859 1.57464   9
   1   7  -7 2.28044 1.48485   3
  -1   7   7 2.53604 1.19651   9
  -1   7   7 2.48175 1.38026   7
  -1   7   7 4.68307 1.00536  11
  -1   7   7 1.62285 1.20023   8
   1   7  -7 3.52040 1.50123   8
   1   7  -7 3.84033 1.50009   1
  -1   7   7 3.30428 1.00063  14
  -1   7   7 3.87031 1.50492  17
  -1   7   7 2.77931 1.42559  10
  -1   7   7 3.31266 1.37461   5
  -1   7   7 2.56670 0.78028  15
  -1  -7   7 3.42239 1.90277   7
  -1  -7   7 1.65098 1.45597   9
  -1  -7   7 3.32393 0.84619  14
  -1  -7   7 1.36351 1.87811   6
   1   7  -7 2.31756 0.81122  15
  -1   7   7 2.72886 1.32460   3
   1   7  -7 3.01341 1.18319  13
  -1  -7   7 2.09433 1.01680   4
  -1   7   7 4.21659 1.56438   2
  -1   7   7 3.50594 1.52548   4
   1   7  -7 4.04896 1.03681  16
  -1   7   7 4.60807 0.99068  16
  -1   7   6 101.383 6.98536   7
  -1   7   6 99.5199 6.58945   1
  -1   7   6 110.134 6.97354   3
  -1  -7   6 116.422 7.83417   7
   1   7  -6 108.412 7.06665  10
  -1  -7   6 93.9245 7.34335   8
   1   7  -6 113.652 7.09934   1
  -1  -7   6 99.2524 6.58682  15
   1   7  -6 103.623 7.06857   3
  -1   7   6 110.881 6.58019  16
  -1   7   6 102.706 6.93716   9
  -1  -7   6 101.370 6.45643  14
  -1   7   6 100.808 6.96254   6
   1   7  -6 108.451 6.46816  15
   1   7  -6 103.106 6.70833  13
   1   7  -6 117.596 7.26701   8
  -1   7   6 119.050 7.10449   2
   1   7  -6 111.333 6.70334  16
  -1  -7   6 107.983 7.74583   6
  -1   7   6 99.6668 6.93322   8
  -1   7   6 94.4277 6.56193  14
  -1   7   6 106.808 6.91394   4
  -1   7   6 108.442 7.00597  17
  -1   7   6 106.091 6.93481   5
  -1   7   6 117.623 6.99279  10
  -1   7   6 103.626 6.44843  15
   1   7  -6 96.9992 7.08838   9
   1   7  -5 0.90341 0.97448  13
  -1  -7   5 4.34205 1.81116   7
  -1   7   5 3.54423 1.37882   6
  -1   7   5 2.90630 1.39402   3
  -1   7   5 1.06347 1.27746   5
   1   7  -5 3.33034 1.77645   7
  -1   7   5 1.52021 1.15377  10
  -1   7   5 3.00923 1.13564   4
  -1  -7   5 0.29499 1.80541   6
  -1  -7   5 1.87865 0.64084  14
  -1   7   5 1.88060 1.34270   8
  -1   7   5 1.81470 0.75455  14
  -1   7   5 3.79451 1.49412   2
  -1  -7   5 1.17226 1.22311  17
  -1   7   5 1.45902 0.90694  16
   1   7  -5 1.60945 1.39671   8
   1   7  -5 1.28752 1.36334   3
  -1   7   5 0.16670 1.25514   9
   1   7  -5 2.56642 1.36180  10
  -1  -7   5 1.80743 1.28295   8
   1   7  -5 2.58048 1.38614   9
  -1   7   5 1.77454 1.20295  17
   1   7  -5 0.70592 1.19046   1
  -1   7   5 1.80849 0.93236   1
   1   7  -5 1.93061 0.91549  16
   1   7  -5 2.34836 0.64835  15
  -1   7   5 2.83509 1.43579   7
  -1  -7   4 103.138 6.74695  17
   1   7  -4 99.1857 6.91485  10
  -1   7   4 113.807 6.78764  10
  -1   7   4 104.802 6.96482   3
  -1   7   4 117.381 6.67669   4
  -1   7   4 100.370 6.44428  14
  -1   7   4 113.064 7.06282   2
  -1  -7   4 101.342 7.56168   7
   1   7  -4 110.110 7.44889   7
   1   7  -4 102.207 7.09895   9
   1   7  -4 102.852 6.36818  15
   1  -7  -4 119.434 7.19459   8
   1   7  -4 119.039 6.72955  16
  -1  -7   4 107.111 6.39762  14
  -1   7   4 98.8993 6.57205  16
  -1  -7   4 124.194 7.25958   9
   1   7  -4 98.6553 7.07103   8
   1   7  -4 105.145 7.06411   3
  -1   7   4 95.6340 6.94974   8
  -1   7   4 110.194 7.09720   6
  -1  -7   4 100.651 7.34827   8
  -1   7   4 98.6585 7.10005   7
  -1   7   4 102.935 6.67533   1
   1   7  -4 104.776 6.67014  13
  -1   7   4 111.435 6.92256   5
  -1   7   4 100.688 6.97704   9
  -1   7   4 93.9210 6.82250  17
  -1   7   3 33.2122 2.53168   4
   1   7  -3 39.8134 3.50676   7
   1  -7  -3 41.7078 2.66818  17
  -1  -7   3 35.6589 3.23593   9
  -1  -7   3 37.6266 2.61508  17
   1   7  -3 41.1644 2.77959  16
  -1   7   3 35.0026 2.71768  16
  -1   7   3 41.9037 2.84449  10
   1   7  -3 36.9539 2.40030  15
  -1  -7   3 36.5640 3.55020   7
  -1   7   3 37.4353 3.00989  17
  -1  -7   3 38.4174 2.45023  14
   1  -7  -3 35.1465 3.21983   8
  -1   7   3 33.3226 3.09725   8
   1   7  -3 32.5212 3.13078   3
  -1   7   3 36.1612 3.28636   7
  -1  -7   3 42.5071 3.51066   8
   1   7  -3 40.8554 3.10521  10
  -1   7   3 38.1794 3.13822   3
   1   7  -3 37.4424 3.25364   9
  -1   7   3 42.3610 3.12624   5
  -1   7   3 33.9264 2.78351   1
  -1   7   3 32.6761 2.43692  14
  -1   7   3 39.6554 3.33018   6
  -1   7   3 36.3889 3.14976   9
  -1  -7   2 111.322 6.75801   8
  -1  -7   2 103.611 6.46080   9
   1   7  -2 104.967 5.97909  16
   1   7  -2 79.4410 6.26769   9
   1   7  -2 100.037 6.21893  10
  -1   7   2 97.0115 5.91138  16
  -1   7   2 85.4238 5.96981   1
  -1  -7   2 90.7644 5.60644  17
  -1   7   2 89.0212 6.34863   8
   1   7  -2 83.7270 6.44556   7
   1   7  -2 83.8938 6.26505   3
  -1   7   2 93.9306 6.14373  17
  -1   7   2 94.8358 5.56419  14
  -1  -7   2 88.8718 6.72464   7
   1  -7  -2 96.5502 6.47094   8
  -1   7   2 90.7963 6.48226   7
   1   7  -2 89.0586 5.56089  15
  -1  -7   2 91.5210 5.63159  14
  -1   7   2 88.5735 6.41869   6
  -1   7   2 99.0634 6.17695   5
   1  -7  -2 97.3024 5.80727  17
  -1   7   2 95.6805 6.30619   3
  -1   7   2 91.7251 6.30545   9
  -1  -7   1 64.2903 4.70607   9
  -1   7   1 70.4681 4.48812   1
   1   7  -1 60.8281 4.70508   8
  -1   7   1 61.8682 4.83904   6
  -1  -7   1 64.5670 4.00210  14
   1   7  -1 68.9220 4.95795   7
   1  -7  -1 59.6512 4.17548  17
   1   7  -1 60.6221 4.52413   1
  -1   7   1 68.2562 4.78849   8
   1   7  -1 63.2205 3.89298  15
  -1   7   1 69.0715 4.31663  16
  -1   7   1 61.9562 4.08311  15
  -1   7   1 69.2858 4.71482   3
   1  -7  -1 73.4043 4.99588   7
  -1  -7   1 65.0356 3.85266  17
   1  -7  -1 65.6959 4.85904   8
  -1  -7   1 71.4581 5.01875   8
  -1   7   1 57.2670 4.83957   7
  -1  -7   0 282.796 15.4318  14
  -1   7   0 263.804 15.6441  10
   1   7   0 253.290 16.1872   7
   1   7   0 290.360 15.3668   4
   1   7   0 228.543 15.4075  14
  -1   7   0 247.826 16.2979   7
   1   7   0 269.676 15.3787   4
  -1   7   0 258.062 15.8185   1
   1   7   0 252.086 16.0329   8
   1   7   0 250.558 15.2866  15
   1  -7   0 265.319 16.3828   7
   1   7   0 259.247 15.8599   1
   1  -7   0 260.554 15.6311  17
  -1  -7   0 274.907 16.3168   8
  -1   7   0 257.466 16.2909   6
  -1   7   0 260.236 15.4863  15
  -1  -7   0 274.467 16.1383   9
   1  -7   0 277.804 16.3199   8
   1   7   0 259.785 16.0822   6
  -1  -7  -1 45.6956 3.46734   9
   1  -7   1 47.4111 3.71478   8
   1   7   1 44.4028 3.35131   5
   1   7   1 48.6360 2.89524   4
   1   7   1 43.2894 2.80093  14
  -1   7  -1 37.5556 2.81572  15
  -1   7  -1 35.2443 3.17024   1
  -1   7  -1 34.3641 3.60534   7
  -1  -7  -1 43.9004 3.63143   8
   1   7   1 40.8195 2.61215  15
   1   7   1 42.2122 3.44157   9
  -1   7  -1 39.3354 3.45843   9
  -1   7  -1 41.3005 3.00824  10
   1  -7   1 41.0597 3.09299  17
   1   7   1 40.4946 3.42447   8
   1   7   1 45.5290 3.23990   1
  -1  -7  -1 46.7216 3.36941   6
   1   7   1 45.2822 3.46149   6
  -1   7  -1 44.8628 3.79561   6
   1   7   1 41.7331 3.49344   3
   1  -7   1 45.5700 3.80804   7
   1   7   1 41.5446 3.57607   7
   1   7   2 325.757 18.3543   1
  -1   7  -2 324.615 19.0119   6
  -1   7  -2 307.893 18.9375   7
   1  -7   2 300.726 18.3578  17
   1   7   2 311.220 18.1636  16
  -1   7  -2 306.263 18.0188  15
  -1  -7  -2 322.187 18.3620   6
  -1   7  -2 305.950 18.5589   3
   1   7   2 294.545 17.7973  15
   1   7   2 328.498 18.5168   5
   1   7   2 327.582 18.1743   4
   1  -7   2 317.443 18.8923   8
   1   7   2 291.769 18.0398  17
   1   7   2 322.364 18.6089   3
   1   7   2 305.497 18.5540   9
   1   7   2 306.500 18.0472  14
   1   7   2 289.066 18.5995   7
  -1  -7  -2 320.539 18.7329   8
  -1  -7  -2 324.294 18.6148   9
   1   7   2 297.682 18.5016   8
   1  -7   2 295.562 18.9810   7
   1   7   2 278.194 18.4190   6
  -1   7  -2 295.305 18.5773   9
  -1   7  -2 332.232 18.2317  10
  -1   7  -2 281.977 18.1664  16
   1   7   3 43.0843 3.47869   7
   1  -7   3 40.0419 3.68710   8
   1   7   3 39.8915 3.39643   3
   1  -7   3 47.7349 3.49278  17
   1   7   3 39.1752 3.37876   9
  -1   7  -3 47.5029 3.68568   8
  -1  -7  -3 44.8999 3.46091   9
   1   7   3 51.2110 3.10791  16
   1  -7   3 42.3779 3.00789  16
   1  -7   3 47.6807 4.06186   6
  -1  -7  -3 43.4303 3.08311   6
   1   7   3 48.9808 3.23831   1
   1   7   3 47.3094 3.48325   5
  -1   7  -3 37.1775 3.38407   3
   1   7   3 45.6175 3.35190   6
   1   7   3 49.2600 3.22164   4
   1   7   3 37.3620 3.00592  17
  -1   7  -3 41.4137 3.53258   9
  -1   7  -3 42.1395 3.12327  16
   1  -7   3 42.0634 3.97905   7
  -1   7  -3 45.1393 3.14785  10
   1   7   3 41.7290 2.96134  14
  -1   7  -3 46.1568 2.92820  15
   1   7   3 37.9061 2.66900  15
   1   7   3 41.0537 3.35680   8
   1   7   4 91.6528 6.76679   7
   1   7   4 106.669 6.89372   3
  -1   7  -4 100.239 6.96802   8
  -1   7  -4 100.338 6.72828   1
   1   7   4 117.186 6.90918  10
  -1   7  -4 117.740 6.97966   3
   1   7   4 106.521 6.99907   2
  -1   7  -4 120.223 6.65900  10
  -1  -7  -4 113.568 6.44567   6
   1  -7   4 100.176 7.16866   8
  -1   7  -4 107.303 6.99643   9
   1   7   4 99.1996 6.71794   8
   1  -7   4 100.148 6.04997  14
   1   7   4 92.8842 6.11392  15
   1   7   4 89.9936 6.35919  14
   1   7   4 101.054 6.75802   9
  -1   7  -4 100.489 6.33060  15
   1   7   4 97.0433 6.76430   5
  -1  -7  -4 112.019 6.86227   9
   1   7   4 104.816 6.51589  17
   1   7   4 91.3882 6.60188   6
   1   7   4 103.552 6.41834  16
   1  -7   4 106.667 7.46558   7
   1  -7   4 101.895 6.98463  17
  -1   7  -4 105.916 6.52183  16
   1   7   4 115.577 6.74333   4
   1   7   4 100.537 6.50976   1
   1  -7   4 103.029 6.40668  16
   1  -7   4 105.262 7.48720   6
   1   7   5 110.977 7.09701  17
   1   7   5 113.320 7.17535   6
  -1   7  -5 125.689 7.49833   3
   1   7   5 125.895 7.62183   2
   1   7   5 119.512 6.96635  16
   1   7   5 106.569 7.22980   9
   1   7   5 109.342 7.32961   3
  -1   7  -5 116.669 7.21314  10
   1   7   5 113.353 7.35545   5
  -1  -7  -5 130.024 7.42106   9
   1   7   5 110.653 7.31538   7
  -1   7  -5 107.122 7.03101  16
   1  -7   5 110.714 8.10636   6
   1  -7   5 117.398 8.11288   7
   1   7   5 103.983 6.70340  15
  -1   7  -5 107.016 7.46861   9
   1   7   5 133.396 7.54250  10
   1   7   5 108.806 6.99801  14
  -1   7  -5 117.994 7.32954   1
  -1   7  -5 103.036 7.50553   8
   1  -7   5 108.011 6.69894   4
   1   7   5 117.072 7.34781   4
  -1   7  -5 111.190 6.89827  15
   1  -7   5 119.943 7.75324  17
   1   7   5 114.505 7.04234   1
   1  -7   5 107.670 7.73212   8
   1  -7   5 103.258 6.66379  14
   1  -7   5 107.538 6.92793  16
   1   7   5 112.675 7.26722   8
   1   7   6 160.693 9.55925   1
   1   7   6 177.918 10.2295   2
  -1   7  -6 159.768 9.86319  10
  -1   7  -6 157.194 9.62281  16
   1   7   6 164.154 9.95830   5
   1   7   6 156.594 9.73812  17
   1   7   6 154.977 9.71486   6
   1   7   6 164.314 9.94842   3
  -1   7  -6 150.815 10.0556   9
   1  -7   6 152.853 9.38914   4
   1   7   6 146.165 9.61709  14
   1  -7   6 164.352 10.7305   7
   1   7   6 167.399 9.53481  16
  -1   7  -6 158.317 9.92773   1
  -1   7  -6 154.919 9.96694   3
   1   7   6 148.531 9.31901  15
   1   7   6 143.734 9.77128   7
  -1   7  -6 171.823 10.6171   7
   1   7   6 164.643 10.0695  10
   1   7   6 144.705 9.73138   8
   1  -7   6 143.038 9.28614  14
   1   7   6 185.332 10.1534   4
   1  -7   6 156.182 10.7823   6
  -1   7  -6 158.632 9.52145  15
  -1   7  -6 148.614 10.1073   8
   1   7   6 160.986 9.81404   9
   1   7   7 6.11510 1.32153  14
   1   7   7 4.97861 1.52723   5
  -1   7  -7 9.61794 1.85497   3
   1   7   7 3.49020 1.31472   8
  -1   7  -7 6.13801 1.11625  16
   1  -7   7 4.68817 1.08844   4
   1  -7   7 10.7966 2.49635   6
  -1   7  -7 4.46679 1.77672   9
   1   7   7 8.79007 1.94776   4
  -1   7  -7 8.42966 1.67938  10
   1   7   7 6.61654 1.07831   1
  -1   7  -7 4.99867 1.48139   1
   1   7   7 7.12499 0.95448  15
   1   7   7 6.29393 1.42679  17
   1   7   7 4.98007 1.39834   6
   1   7   7 6.36431 1.72927  10
   1   7   7 6.59982 1.42662   7
  -1   7  -7 2.86287 1.55844   8
  -1   7  -7 7.12001 1.14407  15
   1  -7   7 4.91589 2.07892   7
   1   7   7 7.94860 0.86825  13
  -1   7  -7 7.11617 2.19858   7
   1   7   7 7.82882 1.58759   3
   1   7   7 6.03971 1.79351   2
   1   7   7 4.89422 1.37367   9
   1   7   8 77.3144 5.55175  17
   1   7   8 76.7553 5.05828   1
  -1   7  -8 83.3657 5.86842   8
  -1   7  -8 94.4488 5.86623  10
   1  -7   8 82.4532 6.58131   7
  -1   7  -8 81.6949 5.24589  15
   1   7   8 77.9356 5.51904   3
   1  -7   8 81.2734 5.20366  16
   1   7   8 68.6781 5.02841  15
   1   7   8 76.6210 5.41956   7
   1   7   8 83.3387 5.92799   2
   1   7   8 83.5859 5.93280  10
   1   7   8 75.6829 5.34641   6
   1  -7   8 80.8743 5.50228  15
  -1   7  -8 83.4189 6.27526   7
   1   7   8 76.3457 5.33709   8
  -1   7  -8 74.0835 5.60036   1
   1   7   8 82.3467 5.60515   5
  -1   7  -8 94.1724 6.00169   2
   1  -7   8 82.3708 6.70440   6
   1  -7   8 83.9139 5.30872   4
  -1   7  -8 79.3382 5.28506  16
   1   7   8 91.8444 6.05135   4
  -1   7  -8 92.3886 5.81309   3
   1   7   8 82.8766 5.36466   9
  -1   7  -8 74.3004 5.75527   9
  -1   7  -8 80.2584 5.36325  13
   1   7   8 72.1166 5.39414  14
   1   7   8 81.5602 4.91813  13
   1  -7   8 80.1848 6.06973   8
   1   7   9 15.9426 1.97957   3
   1  -7   9 16.4441 1.74461  16
  -1   7  -9 12.5429 2.27354  10
   1   7   9 19.3794 2.61927  10
   1   7   9 15.8000 1.62532  15
   1   7   9 16.0939 1.93420   6
   1  -7   9 18.1126 3.15428   7
  -1   7  -9 21.4208 2.63146   2
   1  -7   9 16.5117 1.98291   4
   1   7   9 17.3352 2.21166  17
   1  -7   9 23.0778 3.42121   6
  -1   7  -9 20.3737 1.89216  16
   1   7   9 17.3011 1.37745  13
   1   7   9 21.9629 1.63220  11
  -1   7  -9 19.2023 1.96201  13
   1   7   9 20.1761 2.15749   5
  -1   7  -9 17.3721 1.80857  15
  -1   7  -9 11.6787 2.37490   9
  -1   7  -9 15.1206 2.40445   8
   1   7   9 18.8885 2.01212   7
   1   7   9 16.0593 1.95565  14
   1   7   9 18.0775 2.60809   4
   1   7   9 17.8015 1.46282   1
   1  -7   9 16.3069 1.98409  15
   1   7   9 19.6884 1.88958   9
   1  -7   9 16.8979 2.75585   8
   1   7   9 15.4661 1.74441   8
  -1   7  -9 13.5908 2.20572   1
  -1   7  -9 17.1937 2.31653   3
   1   7   9 19.5859 2.56267   2
  -1   7 -10 25.6197 2.34892  16
   1   7  10 27.6559 2.66294  14
  -1   7 -10 31.6053 2.90997   3
   1   7  10 26.1291 3.10163   2
   1   7  10 28.2122 1.95782  13
  -1   7 -10 22.8900 3.04229   2
   1  -7  10 27.2406 2.64185   4
   1   7  10 25.3820 2.43401   6
  -1   7 -10 33.2647 2.53783  13
   1   7  10 42.8553 2.35447  11
   1  -7  10 23.3141 2.25212  16
   1   7  10 29.0281 1.86580   1
   1  -7  10 29.7747 2.67518  15
  -1   7 -10 32.0803 3.11403   8
   1   7  10 24.4494 2.28816   9
   1  -7  10 27.1393 3.93019   6
   1  -7  10 21.4197 3.14384   8
  -1   7 -10 25.6949 2.92927   9
   1   7  10 25.0463 2.44002   7
   1   7  10 29.7804 2.57534   3
  -1   7 -10 21.4139 2.80871   1
  -1   7 -10 30.0223 2.41022  15
   1  -7  10 26.7096 2.90720  10
   1   7  10 27.4387 3.26934  10
   1   7  10 27.4911 3.21865   4
   1   7  10 23.1982 2.26132   8
   1   7  10 23.0271 2.22357  15
  -1   7 -10 25.5601 3.06271  10
   1   7  10 32.4853 2.72385   5
   1   7  10 27.8938 2.85214  17
   1   7  11 60.1664 4.02701   3
  -1   7 -11 55.6975 4.78224   2
  -1   7 -11 47.8382 4.34684   1
   1   7  11 47.4634 4.14891  14
   1  -7  11 51.3931 4.46756  10
   1  -7  11 46.9350 4.11591   4
   1   7  11 47.5960 3.89868   6
  -1   7 -11 53.6450 4.60459  10
   1  -7  11 46.0181 5.33276   6
   1   7  11 47.1752 4.24211  17
  -1   7 -11 56.0708 3.99791  15
   1  -7  11 46.8692 4.61646   8
   1  -7  11 52.8168 3.78977  16
  -1   7 -11 56.1767 3.92342  16
   1   7  11 69.4917 4.91063   2
  -1   7 -11 59.6032 4.51359   8
  -1   7 -11 54.4720 4.43756   9
   1   7  11 46.8353 3.65645   8
   1   7  11 57.1618 3.75409   9
   1   7  11 50.0634 3.84312   7
   1   7  11 62.9446 5.16233   4
   1   7  11 53.9559 4.12165   5
  -1   7 -11 53.9772 4.28223   3
   1   7  11 49.2282 4.80799  10
   1  -7  11 54.2336 4.24674  15
   1   7  11 53.9769 3.44370  13
   1   7  11 74.5917 3.72609  11
   1   7  11 47.9944 3.77028  15
   1   7  12 89.7843 6.39531  15
  -1   7 -12 95.5779 6.85774   3
  -1   7 -12 101.101 7.26999  10
   1  -7  12 85.2859 8.09959   6
   1  -7  12 85.8005 6.71505   4
   1   7  12 106.182 6.45693   3
   1   7  12 91.7877 6.35334   7
  -1   7 -12 95.3567 6.94058   1
   1   7  12 95.9451 7.49523   4
   1  -7  12 98.5717 7.12004  10
  -1   7 -12 106.293 7.03992   8
   1   7  12 110.029 7.34561   2
  -1   7 -12 98.4909 6.46761  16
   1   7  12 93.1144 6.14580   8
   1  -7  12 89.1666 7.20443   8
   1   7  12 96.9283 6.17629   9
   1   7  12 91.7892 6.45346   6
  -1   7 -12 102.922 6.54925  15
   1   7  12 98.9042 6.00397  13
   1   7  12 105.492 7.03915  17
   1   7  12 106.106 6.66529   5
   1   7  12 112.023 6.02139  11
   1   7  12 77.4870 6.59905  14
  -1   7 -12 97.3476 6.93528   9
   1  -7  12 100.675 6.87414  15
   1   7  12 110.653 7.54699  10
   1   7  13 17.8998 1.63574   8
   1   7  13 24.6075 3.52155  10
  -1   7 -13 23.0796 2.29486  15
  -1   7 -13 21.4838 3.11272  10
   1   7  13 18.4715 2.43837  14
  -1   7 -13 21.8161 2.18088  16
   1   7  13 18.3741 3.02258   2
  -1   7 -13 21.0511 2.69512   3
   1   7  13 19.7394 1.61241  13
   1   7  13 23.5718 2.38259   5
   1  -7  13 15.4201 3.56087   7
   1  -7  13 26.2343 3.32689   8
   1   7  13 20.4432 2.07553   7
   1   7  13 20.6151 1.74474   9
   1   7  13 20.1318 2.16340  15
   1  -7  13 24.4070 2.60707  15
   1  -7  13 19.3122 3.86745   6
   1   7  13 28.6192 2.14428   3
   1  -7  13 15.2708 2.80938  10
   1   7  13 22.4539 2.84575  17
  -1   7 -13 23.0449 2.85572   1
   1   7  13 18.0718 2.20614   6
   1   7  13 21.0032 3.55755   4
  -1   7 -13 26.5804 2.85985   9
   1  -7  14 46.6483 5.85262   6
  -1   7 -14 63.3326 4.25558  16
   1   7  14 52.0951 3.49597   8
   1   7  14 63.3144 4.97705  17
   1   7  14 52.4215 4.61091  14
  -1   7 -14 60.8663 5.19020  10
   1   7  14 51.9437 4.15961   6
   1   7  14 56.4971 3.63823  13
   1  -7  14 58.4091 5.08274  10
   1   7  14 61.7136 4.27801   5
   1   7  14 58.7285 3.98039   3
   1  -7  14 59.0748 4.67732  15
   1   7  14 58.7213 3.59714   9
   1  -7  14 60.0113 5.18499   8
[truncated: 4,176,638 more chars]
