# Supplementary material
Source: MDPI journal article supplement (https://www.mdpi.com/2304-6740/7/11/134)
Supplement: s1 [file s1 › maw200916.cif]

 
data_maw200916 
 
_audit_creation_method            SHELXL-97 
_chemical_name_systematic 
; 
 ? 
; 
_chemical_name_common             [Re(CO)3(allylSAAC)]PF6 
_chemical_melting_point           ? 
_chemical_formula_moiety          'C28 H25 F6 N3 O3.50 P Re' 
_chemical_formula_sum 
 'C56 H50 F12 N6 O7 P2 Re2' 
_chemical_formula_weight          1581.36 
 
loop_ 
 _atom_type_symbol 
 _atom_type_description 
 _atom_type_scat_dispersion_real 
 _atom_type_scat_dispersion_imag 
 _atom_type_scat_source 
 'C'  'C'   0.0033   0.0016 
 'International Tables Vol C Tables 4.2.6.8 and 6.1.1.4' 
 'H'  'H'   0.0000   0.0000 
 'International Tables Vol C Tables 4.2.6.8 and 6.1.1.4' 
 'N'  'N'   0.0061   0.0033 
 'International Tables Vol C Tables 4.2.6.8 and 6.1.1.4' 
 'O'  'O'   0.0106   0.0060 
 'International Tables Vol C Tables 4.2.6.8 and 6.1.1.4' 
 'F'  'F'   0.0171   0.0103 
 'International Tables Vol C Tables 4.2.6.8 and 6.1.1.4' 
 'P'  'P'   0.1023   0.0942 
 'International Tables Vol C Tables 4.2.6.8 and 6.1.1.4' 
 'Re'  'Re'  -1.0185   7.2310 
 'International Tables Vol C Tables 4.2.6.8 and 6.1.1.4' 
 
_symmetry_cell_setting            monoclinic  
_symmetry_space_group_name_H-M    P21
 
loop_ 
 _symmetry_equiv_pos_as_xyz 
 'x, y, z' 
 '-x, y+1/2, -z' 
 
_cell_length_a                    17.6463(6) 
_cell_length_b                    9.5745(2) 
_cell_length_c                    18.6548(7) 
_cell_angle_alpha                 90.00 
_cell_angle_beta                  115.083(4) 
_cell_angle_gamma                 90.00 
_cell_volume                      2854.58(16) 
_cell_formula_units_Z             2 
_cell_measurement_temperature     183(2) 
_cell_measurement_reflns_used     20512 
_cell_measurement_theta_min       2.5110 
_cell_measurement_theta_max       34.4150
 
_exptl_crystal_description        stick 
_exptl_crystal_colour             colorless
_exptl_crystal_size_max           0.59 
_exptl_crystal_size_mid           0.17 
_exptl_crystal_size_min           0.09 
_exptl_crystal_density_meas       ? 
_exptl_crystal_density_diffrn     1.840 
_exptl_crystal_density_method     'not measured' 
_exptl_crystal_F_000              1544 
_exptl_absorpt_coefficient_mu     4.390 
_exptl_absorpt_correction_type    analytical  
_exptl_absorpt_correction_T_min   0.1815 
_exptl_absorpt_correction_T_max   0.6934 
_exptl_absorpt_process_details     
;
CrysAlisPro 1.171.38.43 (Rigaku Oxford Diffraction, 2015)
Analytical numeric absorption correction using a multifaceted crystal
			model based on expressions derived by R.C. Clark & J.S. Reid.
(Clark, R. C. & Reid, J. S. (1995). Acta Cryst. A51, 887-897)
Empirical absorption correction using spherical harmonics,
 implemented in SCALE3 ABSPACK scaling algorithm.
;  
_exptl_special_details 
; 
 none 
; 
 
_diffrn_ambient_temperature       183(2) 
_diffrn_radiation_wavelength      0.71073 
_diffrn_radiation_type            MoK\a 
_diffrn_radiation_source          'fine-focus sealed tube' 
_diffrn_radiation_monochromator   graphite 
_diffrn_measurement_device_type   'Xcalibur, Ruby'
_diffrn_measurement_method        '\w scans'
_diffrn_detector_area_resol_mean  10.4498  
_diffrn_standards_number          ? 
_diffrn_standards_interval_count  ? 
_diffrn_standards_interval_time   ? 
_diffrn_standards_decay_%         ? 
_diffrn_reflns_number             44314 
_diffrn_reflns_av_R_equivalents   0.0347 
_diffrn_reflns_av_sigmaI/netI     0.0391 
_diffrn_reflns_limit_h_min        -24 
_diffrn_reflns_limit_h_max        25 
_diffrn_reflns_limit_k_min        -13 
_diffrn_reflns_limit_k_max        13 
_diffrn_reflns_limit_l_min        -26 
_diffrn_reflns_limit_l_max        26 
_diffrn_reflns_theta_min          2.20 
_diffrn_reflns_theta_max          30.51 
_reflns_number_total              17390 
_reflns_number_gt                 15898 
_reflns_threshold_expression      >2sigma(I) 
 
_computing_data_collection        'CrysAlisPro 1.171.38.43 (Rigaku OD, 2015)'  
_computing_cell_refinement        'CrysAlisPro 1.171.38.43 (Rigaku OD, 2015)' 
_computing_data_reduction         'CrysAlisPro 1.171.38.43 (Rigaku OD, 2015)'  
_computing_structure_solution     'SHELXS-97 (Sheldrick, 1990)' 
_computing_structure_refinement   'SHELXL-97 (Sheldrick, 1997)' 
_computing_molecular_graphics     'ORTEP-3 (Farrugia, 1997)'   
_computing_publication_material   'SHELXL-97 (Sheldrick, 1997)' 
 
_refine_special_details 
; 
 Refinement of F^2^ against ALL reflections.  The weighted R-factor wR and 
 goodness of fit S are based on F^2^, conventional R-factors R are based 
 on F, with F set to zero for negative F^2^. The threshold expression of 
 F^2^ > 2sigma(F^2^) is used only for calculating R-factors(gt) etc. and is 
 not relevant to the choice of reflections for refinement.  R-factors based 
 on F^2^ are statistically about twice as large as those based on F, and R- 
 factors based on ALL data will be even larger. 
; 
 
_refine_ls_structure_factor_coef  Fsqd  
_refine_ls_matrix_type            full 
_refine_ls_weighting_scheme       calc  
_refine_ls_weighting_details 
 'calc w=1/[\s^2^(Fo^2^)+(0.0470P)^2^+0.2279P] where P=(Fo^2^+2Fc^2^)/3' 
_atom_sites_solution_primary      direct 
_atom_sites_solution_secondary    difmap 
_atom_sites_solution_hydrogens    geom 
_refine_ls_hydrogen_treatment     constr
_refine_ls_extinction_method      none 
_refine_ls_extinction_coef        ? 
_refine_ls_abs_structure_details 
 'Flack H D (1983), Acta Cryst. A39, 876-881' 
_refine_ls_abs_structure_Flack    -0.012(5) 
_refine_ls_number_reflns          17390 
_refine_ls_number_parameters      752 
_refine_ls_number_restraints      19 
_refine_ls_R_factor_all           0.0383 
_refine_ls_R_factor_gt            0.0327 
_refine_ls_wR_factor_ref          0.0815 
_refine_ls_wR_factor_gt           0.0777 
_refine_ls_goodness_of_fit_ref    1.033 
_refine_ls_restrained_S_all       1.046 
_refine_ls_shift/su_max           0.002 
_refine_ls_shift/su_mean          0.000 
 
loop_ 
 _atom_site_label 
 _atom_site_type_symbol 
 _atom_site_fract_x 
 _atom_site_fract_y 
 _atom_site_fract_z 
 _atom_site_U_iso_or_equiv 
 _atom_site_adp_type 
 _atom_site_occupancy 
 _atom_site_symmetry_multiplicity 
 _atom_site_calc_flag 
 _atom_site_refinement_flags 
 _atom_site_disorder_assembly 
 _atom_site_disorder_group 
Re1 Re 0.510179(9) 0.216068(17) 0.863452(9) 0.02965(4) Uani 1 1 d . . . 
Re2 Re 0.105493(9) 0.263590(17) 0.740265(9) 0.02813(4) Uani 1 1 d . . . 
P1 P -0.17092(10) 0.0561(2) 0.86163(12) 0.0576(4) Uani 1 1 d D . . 
P2 P -0.26510(13) 0.4192(3) 0.51478(11) 0.0687(5) Uani 1 1 d . . . 
F1 F -0.2639(3) 0.3809(7) 0.5970(3) 0.0866(16) Uani 1 1 d . . . 
F2 F -0.2655(4) 0.4551(7) 0.4319(3) 0.1021(19) Uani 1 1 d . . . 
F3 F -0.3551(3) 0.4693(10) 0.4849(3) 0.140(3) Uani 1 1 d . . . 
F4 F -0.1764(7) 0.3655(18) 0.5438(6) 0.257(8) Uani 1 1 d . . . 
F5 F -0.2273(8) 0.5592(12) 0.5464(4) 0.219(6) Uani 1 1 d . . . 
F6 F -0.2962(11) 0.2729(10) 0.4831(6) 0.240(7) Uani 1 1 d . . . 
F7 F -0.2437(3) 0.0876(9) 0.8870(3) 0.121(3) Uani 1 1 d . A . 
F8 F -0.0975(2) 0.0305(4) 0.8330(2) 0.0590(9) Uani 1 1 d . A . 
F9 F -0.1331(4) 0.2168(8) 0.8800(4) 0.0648(15) Uiso 0.60 1 d PD A 1 
F10 F -0.2277(4) 0.1336(7) 0.7674(4) 0.0675(17) Uiso 0.60 1 d PD A 1 
F11 F -0.1241(6) 0.0028(11) 0.9347(6) 0.107(3) Uiso 0.60 1 d PD A 1 
F12 F -0.2183(5) -0.0768(10) 0.8163(5) 0.090(2) Uiso 0.60 1 d PD A 1 
F9B F -0.2344(7) 0.0052(12) 0.7829(6) 0.086(3) Uiso 0.40 1 d PD A 2 
F10B F -0.1558(7) -0.1103(11) 0.8919(6) 0.084(3) Uiso 0.40 1 d PD A 2 
F12B F -0.1784(8) 0.2085(12) 0.8466(7) 0.094(4) Uiso 0.40 1 d PD A 2 
F11B F -0.1011(5) 0.0806(9) 0.9553(5) 0.052(2) Uiso 0.40 1 d PD A 2 
O1 O 0.4778(3) 0.3483(5) 0.9967(2) 0.0500(10) Uani 1 1 d . . . 
O2 O 0.6494(3) 0.0534(5) 0.9931(3) 0.0596(12) Uani 1 1 d . . . 
O3 O 0.3868(2) 0.0004(4) 0.8720(2) 0.0494(10) Uani 1 1 d . . . 
O31 O 0.2559(2) 0.1210(5) 0.7303(2) 0.0482(9) Uani 1 1 d . . . 
O32 O 0.2403(3) 0.4634(5) 0.8484(3) 0.0594(12) Uani 1 1 d . . . 
O33 O 0.0987(3) 0.4464(4) 0.6034(2) 0.0482(9) Uani 1 1 d . . . 
O61 O -0.4617(7) -0.1735(15) 0.4614(9) 0.198(6) Uani 1 1 d . . . 
N1 N 0.5183(3) 0.1087(5) 0.7627(3) 0.0438(11) Uani 1 1 d . . . 
N2 N 0.4180(2) 0.3263(4) 0.7580(2) 0.0319(8) Uani 1 1 d . . . 
N3 N 0.5982(2) 0.3545(5) 0.8417(3) 0.0378(9) Uani 1 1 d . . . 
N31 N 0.0019(2) 0.3650(4) 0.7587(2) 0.0345(8) Uani 1 1 d . . . 
N32 N -0.0001(2) 0.1248(4) 0.6705(2) 0.0322(8) Uani 1 1 d . . . 
N33 N 0.0982(2) 0.1538(4) 0.8417(2) 0.0337(8) Uani 1 1 d . . . 
C1 C 0.4915(3) 0.3046(5) 0.9457(3) 0.0355(10) Uani 1 1 d . . . 
C2 C 0.5981(3) 0.1134(5) 0.9456(3) 0.0407(11) Uani 1 1 d . . . 
C3 C 0.4324(3) 0.0826(5) 0.8690(3) 0.0361(10) Uani 1 1 d . . . 
C4 C 0.4309(3) 0.1123(6) 0.6973(3) 0.0446(12) Uani 1 1 d . . . 
H4B H 0.4330 0.0918 0.6462 0.054 Uiso 1 1 calc R . . 
H4A H 0.3965 0.0394 0.7069 0.054 Uiso 1 1 calc R . . 
C5 C 0.3917(3) 0.2511(6) 0.6930(3) 0.0371(10) Uani 1 1 d . . . 
C6 C 0.3279(3) 0.2936(6) 0.6200(3) 0.0436(12) Uani 1 1 d . . . 
H6A H 0.3110 0.2354 0.5746 0.052 Uiso 1 1 calc R . . 
C7 C 0.2911(3) 0.4198(7) 0.6162(3) 0.0476(13) Uani 1 1 d . . . 
H7A H 0.2466 0.4493 0.5682 0.057 Uiso 1 1 calc R . . 
C8 C 0.3187(3) 0.5065(5) 0.6832(3) 0.0373(10) Uani 1 1 d . . . 
C9 C 0.2854(3) 0.6411(6) 0.6820(4) 0.0504(14) Uani 1 1 d . . . 
H9A H 0.2414 0.6741 0.6346 0.060 Uiso 1 1 calc R . . 
C10 C 0.3149(3) 0.7245(6) 0.7471(4) 0.0504(13) Uani 1 1 d . . . 
H10A H 0.2916 0.8146 0.7452 0.060 Uiso 1 1 calc R . . 
C11 C 0.3798(3) 0.6764(6) 0.8171(3) 0.0455(12) Uani 1 1 d . . . 
H11A H 0.4006 0.7346 0.8626 0.055 Uiso 1 1 calc R . . 
C12 C 0.4135(3) 0.5473(5) 0.8206(3) 0.0375(10) Uani 1 1 d . . . 
H12A H 0.4579 0.5174 0.8686 0.045 Uiso 1 1 calc R . . 
C13 C 0.3845(3) 0.4568(5) 0.7549(3) 0.0290(9) Uani 1 1 d . . . 
C14 C 0.5747(4) 0.1855(9) 0.7356(4) 0.0629(19) Uani 1 1 d . . . 
H14A H 0.5441 0.2028 0.6780 0.075 Uiso 1 1 calc R . . 
H14B H 0.6230 0.1247 0.7435 0.075 Uiso 1 1 calc R . . 
C15 C 0.6075(3) 0.3224(7) 0.7759(3) 0.0483(13) Uani 1 1 d . . . 
C16 C 0.6495(5) 0.4089(10) 0.7440(5) 0.073(2) Uani 1 1 d . . . 
H16A H 0.6565 0.3801 0.6984 0.088 Uiso 1 1 calc R . . 
C17 C 0.6800(5) 0.5336(11) 0.7782(6) 0.087(3) Uani 1 1 d . . . 
H17A H 0.7041 0.5964 0.7543 0.105 Uiso 1 1 calc R . . 
C18 C 0.6755(4) 0.5692(7) 0.8498(5) 0.0610(19) Uani 1 1 d . . . 
C19 C 0.7114(4) 0.6945(8) 0.8916(7) 0.082(3) Uani 1 1 d . . . 
H19A H 0.7388 0.7574 0.8709 0.099 Uiso 1 1 calc R . . 
C20 C 0.7069(4) 0.7240(7) 0.9589(7) 0.089(3) Uani 1 1 d . . . 
H20A H 0.7270 0.8114 0.9837 0.106 Uiso 1 1 calc R . . 
C21 C 0.6725(3) 0.6275(6) 0.9947(5) 0.0584(18) Uani 1 1 d . . . 
H21A H 0.6732 0.6475 1.0448 0.070 Uiso 1 1 calc R . . 
C22 C 0.6383(3) 0.5051(6) 0.9565(4) 0.0451(13) Uani 1 1 d . . . 
H22A H 0.6152 0.4403 0.9805 0.054 Uiso 1 1 calc R . . 
C23 C 0.6370(3) 0.4749(5) 0.8832(4) 0.0429(12) Uani 1 1 d . . . 
C24 C 0.5467(4) -0.0440(8) 0.7825(4) 0.0635(18) Uani 1 1 d . . . 
H24A H 0.6044 -0.0446 0.8249 0.076 Uiso 1 1 calc R . . 
H24B H 0.5103 -0.0901 0.8037 0.076 Uiso 1 1 calc R . . 
C25 C 0.5452(5) -0.1263(8) 0.7159(4) 0.0673(19) Uani 1 1 d . . . 
H25A H 0.5802 -0.1002 0.6911 0.081 Uiso 1 1 calc R . . 
C26 C 0.4976(6) -0.2324(11) 0.6905(6) 0.097(3) Uani 1 1 d . . . 
H26A H 0.4623 -0.2594 0.7149 0.117 Uiso 1 1 calc R . . 
H26B H 0.4975 -0.2846 0.6471 0.117 Uiso 1 1 calc R . . 
C31 C 0.1978(3) 0.1708(6) 0.7335(3) 0.0362(10) Uani 1 1 d . . . 
C32 C 0.1892(3) 0.3880(6) 0.8086(3) 0.0379(10) Uani 1 1 d . . . 
C33 C 0.0997(3) 0.3768(5) 0.6529(3) 0.0331(9) Uani 1 1 d . . . 
C34 C 0.0318(3) 0.3697(7) 0.8462(3) 0.0449(12) Uani 1 1 d . . . 
H34B H 0.0755 0.4424 0.8686 0.054 Uiso 1 1 calc R . . 
H34A H -0.0152 0.3942 0.8595 0.054 Uiso 1 1 calc R . . 
C35 C 0.0666(3) 0.2320(6) 0.8808(3) 0.0397(11) Uani 1 1 d . . . 
C36 C 0.0656(3) 0.1909(7) 0.9534(3) 0.0496(14) Uani 1 1 d . . . 
H36A H 0.0440 0.2518 0.9804 0.059 Uiso 1 1 calc R . . 
C37 C 0.0957(3) 0.0651(8) 0.9834(3) 0.0547(16) Uani 1 1 d . . . 
H37A H 0.0963 0.0370 1.0325 0.066 Uiso 1 1 calc R . . 
C38 C 0.1264(3) -0.0260(7) 0.9423(3) 0.0471(13) Uani 1 1 d . . . 
C39 C 0.1561(3) -0.1616(7) 0.9694(4) 0.0566(17) Uani 1 1 d . . . 
H39A H 0.1561 -0.1939 1.0175 0.068 Uiso 1 1 calc R . . 
C40 C 0.1846(3) -0.2462(8) 0.9285(4) 0.065(2) Uani 1 1 d . . . 
H40A H 0.2068 -0.3353 0.9493 0.078 Uiso 1 1 calc R . . 
C41 C 0.1816(3) -0.2033(6) 0.8547(4) 0.0517(14) Uani 1 1 d . . . 
H41A H 0.1985 -0.2652 0.8244 0.062 Uiso 1 1 calc R . . 
C42 C 0.1540(3) -0.0706(5) 0.8274(3) 0.0411(11) Uani 1 1 d . . . 
H42A H 0.1538 -0.0403 0.7788 0.049 Uiso 1 1 calc R . . 
C43 C 0.1266(3) 0.0198(5) 0.8698(3) 0.0364(10) Uani 1 1 d . . . 
C44 C -0.0762(3) 0.2781(6) 0.7230(3) 0.0414(11) Uani 1 1 d . . . 
H44B H -0.0933 0.2517 0.7653 0.050 Uiso 1 1 calc R . . 
H44A H -0.1215 0.3359 0.6841 0.050 Uiso 1 1 calc R . . 
C45 C -0.0676(3) 0.1482(5) 0.6827(3) 0.0362(10) Uani 1 1 d . . . 
C46 C -0.1365(3) 0.0546(7) 0.6559(4) 0.0500(14) Uani 1 1 d . . . 
H46A H -0.1862 0.0783 0.6612 0.060 Uiso 1 1 calc R . . 
C47 C -0.1311(4) -0.0679(6) 0.6229(4) 0.0555(16) Uani 1 1 d . . . 
H47A H -0.1741 -0.1357 0.6108 0.067 Uiso 1 1 calc R . . 
C48 C -0.0613(4) -0.0955(6) 0.6064(3) 0.0449(13) Uani 1 1 d . . . 
C49 C -0.0544(4) -0.2194(6) 0.5687(3) 0.0572(17) Uani 1 1 d . . . 
H49A H -0.0970 -0.2883 0.5547 0.069 Uiso 1 1 calc R . . 
C50 C 0.0121(4) -0.2406(7) 0.5525(3) 0.0604(16) Uani 1 1 d . . . 
H50A H 0.0180 -0.3265 0.5298 0.072 Uiso 1 1 calc R . . 
C51 C 0.0728(4) -0.1357(6) 0.5690(3) 0.0529(15) Uani 1 1 d . . . 
H51A H 0.1179 -0.1492 0.5546 0.063 Uiso 1 1 calc R . . 
C52 C 0.0680(3) -0.0138(5) 0.6055(3) 0.0403(11) Uani 1 1 d . . . 
H52A H 0.1087 0.0572 0.6151 0.048 Uiso 1 1 calc R . . 
C53 C 0.0033(3) 0.0057(5) 0.6284(3) 0.0361(10) Uani 1 1 d . . . 
C54 C -0.0165(3) 0.5116(5) 0.7262(4) 0.0425(12) Uani 1 1 d . . . 
H54B H 0.0362 0.5658 0.7478 0.051 Uiso 1 1 calc R . . 
H54A H -0.0365 0.5075 0.6680 0.051 Uiso 1 1 calc R . . 
C55 C -0.0803(4) 0.5876(6) 0.7448(4) 0.0518(14) Uani 1 1 d . . . 
H55A H -0.1361 0.5534 0.7225 0.062 Uiso 1 1 calc R . . 
C56 C -0.0634(5) 0.6974(8) 0.7896(5) 0.072(2) Uani 1 1 d . . . 
H56B H -0.0081 0.7338 0.8126 0.087 Uiso 1 1 calc R . . 
H56A H -0.1063 0.7415 0.7994 0.087 Uiso 1 1 calc R . . 
C61 C -0.3910(12) -0.204(2) 0.5483(11) 0.185(7) Uiso 1 1 d . . . 
H61A H -0.4142 -0.2370 0.5852 0.222 Uiso 1 1 calc R . . 
H61B H -0.3473 -0.2688 0.5485 0.222 Uiso 1 1 calc R . . 
C62 C -0.3611(10) -0.0518(19) 0.5633(10) 0.152(6) Uiso 1 1 d . . . 
H62A H -0.3304 -0.0360 0.6210 0.183 Uiso 1 1 calc R . . 
H62B H -0.3221 -0.0341 0.5388 0.183 Uiso 1 1 calc R . . 
C63 C -0.4332(16) 0.049(3) 0.5298(12) 0.242(12) Uani 1 1 d . . . 
H63A H -0.4668 0.0518 0.5610 0.290 Uiso 1 1 calc R . . 
H63B H -0.4156 0.1441 0.5231 0.290 Uiso 1 1 calc R . . 
C64 C -0.4764(11) -0.0264(18) 0.4535(10) 0.150(6) Uani 1 1 d . . . 
H64A H -0.5373 -0.0089 0.4325 0.180 Uiso 1 1 calc R . . 
H64B H -0.4568 0.0111 0.4148 0.180 Uiso 1 1 calc R . . 
 
loop_ 
 _atom_site_aniso_label 
 _atom_site_aniso_U_11 
 _atom_site_aniso_U_22 
 _atom_site_aniso_U_33 
 _atom_site_aniso_U_23 
 _atom_site_aniso_U_13 
 _atom_site_aniso_U_12 
Re1 0.02759(7) 0.02379(7) 0.02833(8) -0.00033(6) 0.00291(6) 0.00062(6) 
Re2 0.02516(7) 0.02364(7) 0.02963(8) 0.00219(6) 0.00585(6) -0.00200(6) 
P1 0.0470(8) 0.0613(10) 0.0791(12) -0.0253(9) 0.0409(8) -0.0167(7) 
P2 0.0683(11) 0.0828(14) 0.0428(9) 0.0203(9) 0.0117(8) 0.0140(10) 
F1 0.064(2) 0.130(5) 0.059(2) 0.038(3) 0.019(2) 0.018(3) 
F2 0.126(4) 0.123(5) 0.050(2) 0.032(3) 0.029(3) 0.042(4) 
F3 0.080(3) 0.249(10) 0.076(3) 0.052(5) 0.018(3) 0.056(5) 
F4 0.212(9) 0.46(2) 0.157(7) 0.196(11) 0.139(7) 0.231(12) 
F5 0.330(13) 0.235(11) 0.090(5) -0.057(6) 0.086(7) -0.207(11) 
F6 0.52(2) 0.098(5) 0.158(8) -0.027(6) 0.195(11) -0.051(10) 
F7 0.060(2) 0.214(8) 0.116(4) -0.064(5) 0.064(3) -0.027(3) 
F8 0.058(2) 0.052(2) 0.085(3) -0.002(2) 0.048(2) 0.0009(17) 
O1 0.061(2) 0.053(2) 0.0393(19) -0.0117(18) 0.0244(18) -0.016(2) 
O2 0.045(2) 0.053(3) 0.054(3) 0.016(2) -0.0044(19) -0.0001(19) 
O3 0.0477(19) 0.0321(18) 0.049(2) 0.0062(17) 0.0023(17) -0.0124(16) 
O31 0.0365(18) 0.054(2) 0.053(2) 0.0062(19) 0.0178(17) 0.0113(17) 
O32 0.051(2) 0.063(3) 0.050(2) -0.015(2) 0.0084(19) -0.028(2) 
O33 0.059(2) 0.042(2) 0.039(2) 0.0093(17) 0.0165(18) -0.0013(18) 
O61 0.128(8) 0.171(12) 0.290(17) -0.072(12) 0.082(9) -0.044(8) 
N1 0.035(2) 0.048(3) 0.040(2) -0.012(2) 0.0071(17) 0.0089(19) 
N2 0.0262(15) 0.0292(18) 0.0337(19) 0.0007(15) 0.0061(14) 0.0035(15) 
N3 0.0275(16) 0.040(2) 0.041(2) 0.0057(18) 0.0096(16) 0.0036(16) 
N31 0.0318(17) 0.0312(18) 0.038(2) 0.0038(16) 0.0124(16) 0.0037(15) 
N32 0.0286(16) 0.0227(16) 0.0343(19) 0.0038(15) 0.0028(14) -0.0033(14) 
N33 0.0243(15) 0.034(2) 0.038(2) 0.0080(17) 0.0084(15) -0.0003(15) 
C1 0.037(2) 0.027(2) 0.033(2) 0.0026(18) 0.0054(18) -0.0092(18) 
C2 0.038(2) 0.030(2) 0.040(3) 0.003(2) 0.002(2) -0.0040(19) 
C3 0.038(2) 0.028(2) 0.033(2) 0.0025(18) 0.0055(18) 0.0029(18) 
C4 0.039(2) 0.051(3) 0.030(2) -0.009(2) 0.0019(19) 0.013(2) 
C5 0.0290(17) 0.047(3) 0.0298(19) -0.003(2) 0.0067(15) 0.0035(19) 
C6 0.042(2) 0.055(3) 0.027(2) -0.004(2) 0.0083(18) 0.007(2) 
C7 0.043(3) 0.059(3) 0.032(2) 0.008(2) 0.007(2) 0.014(3) 
C8 0.034(2) 0.039(2) 0.034(2) 0.0071(19) 0.0090(18) 0.0069(19) 
C9 0.044(3) 0.046(3) 0.055(3) 0.019(3) 0.015(2) 0.015(2) 
C10 0.051(3) 0.029(2) 0.067(3) 0.006(3) 0.021(3) 0.012(2) 
C11 0.054(3) 0.030(2) 0.050(3) -0.005(2) 0.020(2) 0.002(2) 
C12 0.042(2) 0.026(2) 0.039(2) 0.0024(18) 0.012(2) 0.0019(18) 
C13 0.0237(17) 0.027(2) 0.033(2) 0.0054(16) 0.0094(16) 0.0009(15) 
C14 0.047(3) 0.094(6) 0.054(3) -0.016(4) 0.027(3) 0.000(3) 
C15 0.036(2) 0.065(4) 0.049(3) 0.017(3) 0.022(2) 0.017(2) 
C16 0.063(4) 0.093(6) 0.076(5) 0.030(5) 0.042(4) 0.015(4) 
C17 0.072(5) 0.092(7) 0.114(7) 0.058(6) 0.055(5) 0.016(5) 
C18 0.039(3) 0.054(4) 0.090(5) 0.032(4) 0.027(3) 0.005(3) 
C19 0.052(4) 0.044(4) 0.157(9) 0.033(5) 0.050(5) 0.002(3) 
C20 0.036(3) 0.028(3) 0.185(10) 0.006(5) 0.030(4) -0.005(2) 
C21 0.031(2) 0.039(3) 0.094(5) -0.015(3) 0.016(3) -0.004(2) 
C22 0.035(2) 0.028(2) 0.064(4) -0.003(2) 0.012(2) -0.0054(19) 
C23 0.0258(19) 0.030(2) 0.071(4) 0.016(2) 0.019(2) 0.0080(17) 
C24 0.062(4) 0.063(4) 0.054(4) 0.001(3) 0.015(3) 0.031(3) 
C25 0.081(5) 0.053(4) 0.071(5) -0.002(3) 0.035(4) 0.023(4) 
C26 0.098(6) 0.074(5) 0.116(8) -0.031(6) 0.041(6) -0.008(6) 
C31 0.034(2) 0.035(2) 0.031(2) 0.0067(19) 0.0059(17) -0.0013(19) 
C32 0.038(2) 0.039(2) 0.030(2) 0.0020(19) 0.0081(19) -0.004(2) 
C33 0.0303(19) 0.028(2) 0.031(2) 0.0009(18) 0.0037(17) -0.0005(17) 
C34 0.042(3) 0.050(3) 0.042(3) -0.005(2) 0.017(2) 0.005(2) 
C35 0.034(2) 0.047(3) 0.034(2) 0.004(2) 0.0109(17) 0.000(2) 
C36 0.040(2) 0.069(4) 0.044(3) 0.009(3) 0.022(2) 0.004(3) 
C37 0.035(2) 0.091(5) 0.037(3) 0.016(3) 0.015(2) -0.002(3) 
C38 0.032(2) 0.056(3) 0.045(3) 0.020(3) 0.008(2) -0.008(2) 
C39 0.043(3) 0.063(4) 0.060(4) 0.035(3) 0.017(3) 0.000(3) 
C40 0.044(3) 0.054(4) 0.082(4) 0.044(4) 0.011(3) 0.002(3) 
C41 0.049(3) 0.033(3) 0.067(4) 0.013(2) 0.019(3) 0.003(2) 
C42 0.040(2) 0.032(2) 0.050(3) 0.011(2) 0.018(2) 0.0001(19) 
C43 0.0244(18) 0.038(2) 0.040(2) 0.014(2) 0.0073(17) -0.0059(17) 
C44 0.0269(18) 0.039(3) 0.054(3) 0.005(2) 0.0132(19) -0.0003(19) 
C45 0.0285(19) 0.034(2) 0.035(2) 0.0092(19) 0.0025(17) -0.0045(17) 
C46 0.033(2) 0.049(3) 0.056(3) 0.000(3) 0.007(2) -0.014(2) 
C47 0.055(3) 0.041(3) 0.052(3) 0.005(3) 0.005(3) -0.017(3) 
C48 0.052(3) 0.032(2) 0.033(2) 0.005(2) 0.000(2) -0.014(2) 
C49 0.077(4) 0.027(3) 0.043(3) 0.002(2) 0.001(3) -0.016(3) 
C50 0.086(4) 0.032(2) 0.042(3) -0.006(3) 0.007(3) 0.002(3) 
C51 0.062(3) 0.040(3) 0.040(3) -0.001(2) 0.005(2) 0.016(3) 
C52 0.045(3) 0.032(2) 0.030(2) -0.0035(19) 0.003(2) 0.005(2) 
C53 0.041(2) 0.0197(19) 0.033(2) 0.0057(17) 0.0017(19) -0.0007(18) 
C54 0.038(2) 0.029(2) 0.059(3) 0.008(2) 0.018(2) 0.0057(19) 
C55 0.051(3) 0.042(3) 0.064(4) 0.004(3) 0.026(3) 0.013(2) 
C56 0.069(4) 0.052(4) 0.094(5) -0.017(4) 0.032(4) 0.009(3) 
C63 0.33(3) 0.18(2) 0.162(19) 0.041(17) 0.05(2) 0.07(2) 
C64 0.163(14) 0.127(13) 0.166(15) -0.047(12) 0.077(12) -0.034(11) 
 
_geom_special_details 
; 
 All esds (except the esd in the dihedral angle between two l.s. planes) 
 are estimated using the full covariance matrix.  The cell esds are taken 
 into account individually in the estimation of esds in distances, angles 
 and torsion angles; correlations between esds in cell parameters are only 
 used when they are defined by crystal symmetry.  An approximate (isotropic) 
 treatment of cell esds is used for estimating esds involving l.s. planes. 
; 
 
loop_ 
 _geom_bond_atom_site_label_1 
 _geom_bond_atom_site_label_2 
 _geom_bond_distance 
 _geom_bond_site_symmetry_2 
 _geom_bond_publ_flag 
Re1 C1 1.899(5) . ? 
Re1 C3 1.909(5) . ? 
Re1 C2 1.925(5) . ? 
Re1 N1 2.199(5) . ? 
Re1 N3 2.207(4) . ? 
Re1 N2 2.218(4) . ? 
Re2 C32 1.905(5) . ? 
Re2 C31 1.905(5) . ? 
Re2 C33 1.924(5) . ? 
Re2 N32 2.208(4) . ? 
Re2 N33 2.215(4) . ? 
Re2 N31 2.222(4) . ? 
P1 F11 1.359(10) . ? 
P1 F12B 1.480(12) . ? 
P1 F9B 1.502(10) . ? 
P1 F12 1.560(9) . ? 
P1 F7 1.575(4) . ? 
P1 F8 1.616(4) . ? 
P1 F9 1.654(8) . ? 
P1 F11B 1.673(8) . ? 
P1 F10B 1.673(11) . ? 
P1 F10 1.775(7) . ? 
P2 F5 1.502(8) . ? 
P2 F4 1.512(8) . ? 
P2 F3 1.521(6) . ? 
P2 F6 1.529(10) . ? 
P2 F1 1.569(5) . ? 
P2 F2 1.580(5) . ? 
O1 C1 1.156(6) . ? 
O2 C2 1.120(6) . ? 
O3 C3 1.144(6) . ? 
O31 C31 1.156(6) . ? 
O32 C32 1.148(6) . ? 
O33 C33 1.133(6) . ? 
O61 C64 1.43(2) . ? 
O61 C61 1.60(2) . ? 
N1 C14 1.490(9) . ? 
N1 C4 1.507(6) . ? 
N1 C24 1.539(8) . ? 
N2 C5 1.313(6) . ? 
N2 C13 1.373(6) . ? 
N3 C15 1.340(7) . ? 
N3 C23 1.396(7) . ? 
N31 C34 1.487(7) . ? 
N31 C44 1.501(6) . ? 
N31 C54 1.509(6) . ? 
N32 C45 1.323(6) . ? 
N32 C53 1.400(7) . ? 
N33 C35 1.323(7) . ? 
N33 C43 1.396(6) . ? 
C4 C5 1.485(7) . ? 
C4 H4B 0.9900 . ? 
C4 H4A 0.9900 . ? 
C5 C6 1.409(6) . ? 
C6 C7 1.359(8) . ? 
C6 H6A 0.9500 . ? 
C7 C8 1.405(8) . ? 
C7 H7A 0.9500 . ? 
C8 C9 1.413(8) . ? 
C8 C13 1.431(6) . ? 
C9 C10 1.359(9) . ? 
C9 H9A 0.9500 . ? 
C10 C11 1.400(8) . ? 
C10 H10A 0.9500 . ? 
C11 C12 1.362(7) . ? 
C11 H11A 0.9500 . ? 
C12 C13 1.407(7) . ? 
C12 H12A 0.9500 . ? 
C14 C15 1.499(10) . ? 
C14 H14A 0.9900 . ? 
C14 H14B 0.9900 . ? 
C15 C16 1.402(10) . ? 
C16 C17 1.353(14) . ? 
C16 H16A 0.9500 . ? 
C17 C18 1.413(13) . ? 
C17 H17A 0.9500 . ? 
C18 C23 1.423(8) . ? 
C18 C19 1.424(12) . ? 
C19 C20 1.321(13) . ? 
C19 H19A 0.9500 . ? 
C20 C21 1.418(11) . ? 
C20 H20A 0.9500 . ? 
C21 C22 1.371(8) . ? 
C21 H21A 0.9500 . ? 
C22 C23 1.389(9) . ? 
C22 H22A 0.9500 . ? 
C24 C25 1.462(10) . ? 
C24 H24A 0.9900 . ? 
C24 H24B 0.9900 . ? 
C25 C26 1.274(12) . ? 
C25 H25A 0.9500 . ? 
C26 H26A 0.9500 . ? 
C26 H26B 0.9500 . ? 
C34 C35 1.482(8) . ? 
C34 H34B 0.9900 . ? 
C34 H34A 0.9900 . ? 
C35 C36 1.417(7) . ? 
C36 C37 1.340(9) . ? 
C36 H36A 0.9500 . ? 
C37 C38 1.413(10) . ? 
C37 H37A 0.9500 . ? 
C38 C39 1.411(9) . ? 
C38 C43 1.423(7) . ? 
C39 C40 1.347(11) . ? 
C39 H39A 0.9500 . ? 
C40 C41 1.416(9) . ? 
C40 H40A 0.9500 . ? 
C41 C42 1.379(7) . ? 
C41 H41A 0.9500 . ? 
C42 C43 1.391(8) . ? 
C42 H42A 0.9500 . ? 
C44 C45 1.493(8) . ? 
C44 H44B 0.9900 . ? 
C44 H44A 0.9900 . ? 
C45 C46 1.420(7) . ? 
C46 C47 1.346(10) . ? 
C46 H46A 0.9500 . ? 
C47 C48 1.417(10) . ? 
C47 H47A 0.9500 . ? 
C48 C49 1.410(9) . ? 
C48 C53 1.418(7) . ? 
C49 C50 1.346(10) . ? 
C49 H49A 0.9500 . ? 
C50 C51 1.405(10) . ? 
C50 H50A 0.9500 . ? 
C51 C52 1.372(8) . ? 
C51 H51A 0.9500 . ? 
C52 C53 1.390(8) . ? 
C52 H52A 0.9500 . ? 
C54 C55 1.498(8) . ? 
C54 H54B 0.9900 . ? 
C54 H54A 0.9900 . ? 
C55 C56 1.297(9) . ? 
C55 H55A 0.9500 . ? 
C56 H56B 0.9500 . ? 
C56 H56A 0.9500 . ? 
C61 C62 1.53(2) . ? 
C61 H61A 0.9900 . ? 
C61 H61B 0.9900 . ? 
C62 C63 1.50(2) . ? 
C62 H62A 0.9900 . ? 
C62 H62B 0.9900 . ? 
C63 C64 1.48(2) . ? 
C63 H63A 0.9900 . ? 
C63 H63B 0.9900 . ? 
C64 H64A 0.9900 . ? 
C64 H64B 0.9900 . ? 
 
loop_ 
 _geom_angle_atom_site_label_1 
 _geom_angle_atom_site_label_2 
 _geom_angle_atom_site_label_3 
 _geom_angle 
 _geom_angle_site_symmetry_1 
 _geom_angle_site_symmetry_3 
 _geom_angle_publ_flag 
C1 Re1 C3 83.1(2) . . ? 
C1 Re1 C2 86.7(2) . . ? 
C3 Re1 C2 88.3(2) . . ? 
C1 Re1 N1 174.24(18) . . ? 
C3 Re1 N1 92.4(2) . . ? 
C2 Re1 N1 96.8(2) . . ? 
C1 Re1 N3 104.91(18) . . ? 
C3 Re1 N3 171.8(2) . . ? 
C2 Re1 N3 93.47(19) . . ? 
N1 Re1 N3 79.49(19) . . ? 
C1 Re1 N2 101.03(17) . . ? 
C3 Re1 N2 95.32(17) . . ? 
C2 Re1 N2 171.8(2) . . ? 
N1 Re1 N2 75.70(16) . . ? 
N3 Re1 N2 81.94(14) . . ? 
C32 Re2 C31 83.9(2) . . ? 
C32 Re2 C33 87.8(2) . . ? 
C31 Re2 C33 86.9(2) . . ? 
C32 Re2 N32 172.7(2) . . ? 
C31 Re2 N32 102.22(19) . . ? 
C33 Re2 N32 96.41(17) . . ? 
C32 Re2 N33 91.97(18) . . ? 
C31 Re2 N33 101.31(18) . . ? 
C33 Re2 N33 171.70(18) . . ? 
N32 Re2 N33 82.95(15) . . ? 
C32 Re2 N31 94.5(2) . . ? 
C31 Re2 N31 175.09(18) . . ? 
C33 Re2 N31 97.68(18) . . ? 
N32 Re2 N31 79.03(15) . . ? 
N33 Re2 N31 74.06(15) . . ? 
F11 P1 F12B 121.8(6) . . ? 
F11 P1 F9B 138.0(6) . . ? 
F12B P1 F9B 99.5(6) . . ? 
F11 P1 F12 101.2(5) . . ? 
F12B P1 F12 135.8(6) . . ? 
F9B P1 F12 36.8(5) . . ? 
F11 P1 F7 89.8(5) . . ? 
F12B P1 F7 81.3(6) . . ? 
F9B P1 F7 89.5(5) . . ? 
F12 P1 F7 90.0(4) . . ? 
F11 P1 F8 92.4(5) . . ? 
F12B P1 F8 96.1(5) . . ? 
F9B P1 F8 89.9(5) . . ? 
F12 P1 F8 91.0(4) . . ? 
F7 P1 F8 177.3(4) . . ? 
F11 P1 F9 97.0(5) . . ? 
F12B P1 F9 28.2(4) . . ? 
F9B P1 F9 124.9(5) . . ? 
F12 P1 F9 161.4(4) . . ? 
F7 P1 F9 94.0(4) . . ? 
F8 P1 F9 84.2(3) . . ? 
F11 P1 F11B 30.7(5) . . ? 
F12B P1 F11B 91.5(5) . . ? 
F9B P1 F11B 168.7(5) . . ? 
F12 P1 F11B 131.9(4) . . ? 
F7 P1 F11B 89.6(4) . . ? 
F8 P1 F11B 91.6(4) . . ? 
F9 P1 F11B 66.4(4) . . ? 
F11 P1 F10B 50.3(5) . . ? 
F12B P1 F10B 172.1(6) . . ? 
F9B P1 F10B 88.1(5) . . ? 
F12 P1 F10B 51.5(4) . . ? 
F7 P1 F10B 96.6(5) . . ? 
F8 P1 F10B 86.1(5) . . ? 
F9 P1 F10B 145.4(4) . . ? 
F11B P1 F10B 80.8(4) . . ? 
F11 P1 F10 176.7(5) . . ? 
F12B P1 F10 55.5(5) . . ? 
F9B P1 F10 45.0(5) . . ? 
F12 P1 F10 81.8(4) . . ? 
F7 P1 F10 91.6(4) . . ? 
F8 P1 F10 86.1(3) . . ? 
F9 P1 F10 79.9(3) . . ? 
F11B P1 F10 146.3(4) . . ? 
F10B P1 F10 132.4(4) . . ? 
F5 P2 F4 86.7(8) . . ? 
F5 P2 F3 94.8(7) . . ? 
F4 P2 F3 178.5(9) . . ? 
F5 P2 F6 175.1(8) . . ? 
F4 P2 F6 88.6(8) . . ? 
F3 P2 F6 89.9(7) . . ? 
F5 P2 F1 90.3(4) . . ? 
F4 P2 F1 89.3(3) . . ? 
F3 P2 F1 90.6(3) . . ? 
F6 P2 F1 91.0(4) . . ? 
F5 P2 F2 90.4(4) . . ? 
F4 P2 F2 90.0(3) . . ? 
F3 P2 F2 90.1(3) . . ? 
F6 P2 F2 88.3(4) . . ? 
F1 P2 F2 178.9(4) . . ? 
C64 O61 C61 108.2(14) . . ? 
C14 N1 C4 108.4(5) . . ? 
C14 N1 C24 110.7(5) . . ? 
C4 N1 C24 109.5(5) . . ? 
C14 N1 Re1 110.8(4) . . ? 
C4 N1 Re1 105.5(3) . . ? 
C24 N1 Re1 111.8(4) . . ? 
C5 N2 C13 118.9(4) . . ? 
C5 N2 Re1 113.4(3) . . ? 
C13 N2 Re1 127.6(3) . . ? 
C15 N3 C23 118.4(5) . . ? 
C15 N3 Re1 113.5(4) . . ? 
C23 N3 Re1 127.7(4) . . ? 
C34 N31 C44 109.7(4) . . ? 
C34 N31 C54 109.1(4) . . ? 
C44 N31 C54 109.7(4) . . ? 
C34 N31 Re2 104.5(3) . . ? 
C44 N31 Re2 110.4(3) . . ? 
C54 N31 Re2 113.3(3) . . ? 
C45 N32 C53 119.4(4) . . ? 
C45 N32 Re2 113.2(3) . . ? 
C53 N32 Re2 126.4(3) . . ? 
C35 N33 C43 118.7(4) . . ? 
C35 N33 Re2 113.2(3) . . ? 
C43 N33 Re2 128.0(3) . . ? 
O1 C1 Re1 174.5(4) . . ? 
O2 C2 Re1 179.7(6) . . ? 
O3 C3 Re1 178.6(5) . . ? 
C5 C4 N1 111.0(4) . . ? 
C5 C4 H4B 109.4 . . ? 
N1 C4 H4B 109.4 . . ? 
C5 C4 H4A 109.4 . . ? 
N1 C4 H4A 109.4 . . ? 
H4B C4 H4A 108.0 . . ? 
N2 C5 C6 123.9(5) . . ? 
N2 C5 C4 117.8(4) . . ? 
C6 C5 C4 118.3(4) . . ? 
C7 C6 C5 118.4(5) . . ? 
C7 C6 H6A 120.8 . . ? 
C5 C6 H6A 120.8 . . ? 
C6 C7 C8 120.0(5) . . ? 
C6 C7 H7A 120.0 . . ? 
C8 C7 H7A 120.0 . . ? 
C7 C8 C9 122.7(5) . . ? 
C7 C8 C13 118.3(5) . . ? 
C9 C8 C13 119.0(5) . . ? 
C10 C9 C8 121.5(5) . . ? 
C10 C9 H9A 119.2 . . ? 
C8 C9 H9A 119.2 . . ? 
C9 C10 C11 119.5(5) . . ? 
C9 C10 H10A 120.3 . . ? 
C11 C10 H10A 120.3 . . ? 
C12 C11 C10 120.8(5) . . ? 
C12 C11 H11A 119.6 . . ? 
C10 C11 H11A 119.6 . . ? 
C11 C12 C13 121.8(5) . . ? 
C11 C12 H12A 119.1 . . ? 
C13 C12 H12A 119.1 . . ? 
N2 C13 C12 122.2(4) . . ? 
N2 C13 C8 120.4(4) . . ? 
C12 C13 C8 117.4(5) . . ? 
N1 C14 C15 115.6(5) . . ? 
N1 C14 H14A 108.4 . . ? 
C15 C14 H14A 108.4 . . ? 
N1 C14 H14B 108.4 . . ? 
C15 C14 H14B 108.4 . . ? 
H14A C14 H14B 107.5 . . ? 
N3 C15 C16 123.0(7) . . ? 
N3 C15 C14 119.3(5) . . ? 
C16 C15 C14 117.6(6) . . ? 
C17 C16 C15 119.8(8) . . ? 
C17 C16 H16A 120.1 . . ? 
C15 C16 H16A 120.1 . . ? 
C16 C17 C18 119.3(7) . . ? 
C16 C17 H17A 120.4 . . ? 
C18 C17 H17A 120.4 . . ? 
C17 C18 C23 119.3(7) . . ? 
C17 C18 C19 122.1(7) . . ? 
C23 C18 C19 118.6(8) . . ? 
C20 C19 C18 120.6(7) . . ? 
C20 C19 H19A 119.7 . . ? 
C18 C19 H19A 119.7 . . ? 
C19 C20 C21 121.2(7) . . ? 
C19 C20 H20A 119.4 . . ? 
C21 C20 H20A 119.4 . . ? 
C22 C21 C20 119.7(8) . . ? 
C22 C21 H21A 120.2 . . ? 
C20 C21 H21A 120.2 . . ? 
C21 C22 C23 120.5(6) . . ? 
C21 C22 H22A 119.7 . . ? 
C23 C22 H22A 119.7 . . ? 
C22 C23 N3 121.1(5) . . ? 
C22 C23 C18 119.2(6) . . ? 
N3 C23 C18 119.6(6) . . ? 
C25 C24 N1 114.9(6) . . ? 
C25 C24 H24A 108.5 . . ? 
N1 C24 H24A 108.5 . . ? 
C25 C24 H24B 108.5 . . ? 
N1 C24 H24B 108.5 . . ? 
H24A C24 H24B 107.5 . . ? 
C26 C25 C24 121.2(9) . . ? 
C26 C25 H25A 119.4 . . ? 
C24 C25 H25A 119.4 . . ? 
C25 C26 H26A 120.0 . . ? 
C25 C26 H26B 120.0 . . ? 
H26A C26 H26B 120.0 . . ? 
O31 C31 Re2 176.5(5) . . ? 
O32 C32 Re2 178.3(5) . . ? 
O33 C33 Re2 177.4(4) . . ? 
C35 C34 N31 109.9(4) . . ? 
C35 C34 H34B 109.7 . . ? 
N31 C34 H34B 109.7 . . ? 
C35 C34 H34A 109.7 . . ? 
N31 C34 H34A 109.7 . . ? 
H34B C34 H34A 108.2 . . ? 
N33 C35 C36 123.3(5) . . ? 
N33 C35 C34 117.1(4) . . ? 
C36 C35 C34 119.6(5) . . ? 
C37 C36 C35 119.1(6) . . ? 
C37 C36 H36A 120.4 . . ? 
C35 C36 H36A 120.4 . . ? 
C36 C37 C38 120.2(5) . . ? 
C36 C37 H37A 119.9 . . ? 
C38 C37 H37A 119.9 . . ? 
C39 C38 C37 122.9(6) . . ? 
C39 C38 C43 118.3(6) . . ? 
C37 C38 C43 118.8(5) . . ? 
C40 C39 C38 121.5(6) . . ? 
C40 C39 H39A 119.3 . . ? 
C38 C39 H39A 119.3 . . ? 
C39 C40 C41 120.4(6) . . ? 
C39 C40 H40A 119.8 . . ? 
C41 C40 H40A 119.8 . . ? 
C42 C41 C40 119.2(6) . . ? 
C42 C41 H41A 120.4 . . ? 
C40 C41 H41A 120.4 . . ? 
C41 C42 C43 121.1(5) . . ? 
C41 C42 H42A 119.4 . . ? 
C43 C42 H42A 119.4 . . ? 
C42 C43 N33 120.9(5) . . ? 
C42 C43 C38 119.4(5) . . ? 
N33 C43 C38 119.7(5) . . ? 
C45 C44 N31 114.6(4) . . ? 
C45 C44 H44B 108.6 . . ? 
N31 C44 H44B 108.6 . . ? 
C45 C44 H44A 108.6 . . ? 
N31 C44 H44A 108.6 . . ? 
H44B C44 H44A 107.6 . . ? 
N32 C45 C46 122.1(5) . . ? 
N32 C45 C44 121.2(4) . . ? 
C46 C45 C44 116.7(5) . . ? 
C47 C46 C45 119.7(6) . . ? 
C47 C46 H46A 120.1 . . ? 
C45 C46 H46A 120.1 . . ? 
C46 C47 C48 119.9(5) . . ? 
C46 C47 H47A 120.1 . . ? 
C48 C47 H47A 120.1 . . ? 
C49 C48 C47 122.2(5) . . ? 
C49 C48 C53 119.4(6) . . ? 
C47 C48 C53 118.5(5) . . ? 
C50 C49 C48 120.5(6) . . ? 
C50 C49 H49A 119.8 . . ? 
C48 C49 H49A 119.8 . . ? 
C49 C50 C51 120.0(6) . . ? 
C49 C50 H50A 120.0 . . ? 
C51 C50 H50A 120.0 . . ? 
C52 C51 C50 121.0(7) . . ? 
C52 C51 H51A 119.5 . . ? 
C50 C51 H51A 119.5 . . ? 
C51 C52 C53 120.0(6) . . ? 
C51 C52 H52A 120.0 . . ? 
C53 C52 H52A 120.0 . . ? 
C52 C53 N32 121.2(4) . . ? 
C52 C53 C48 118.9(5) . . ? 
N32 C53 C48 119.9(5) . . ? 
C55 C54 N31 114.5(5) . . ? 
C55 C54 H54B 108.6 . . ? 
N31 C54 H54B 108.6 . . ? 
C55 C54 H54A 108.6 . . ? 
N31 C54 H54A 108.6 . . ? 
H54B C54 H54A 107.6 . . ? 
C56 C55 C54 123.6(6) . . ? 
C56 C55 H55A 118.2 . . ? 
C54 C55 H55A 118.2 . . ? 
C55 C56 H56B 120.0 . . ? 
C55 C56 H56A 120.0 . . ? 
H56B C56 H56A 120.0 . . ? 
C62 C61 O61 94.2(14) . . ? 
C62 C61 H61A 112.9 . . ? 
O61 C61 H61A 112.9 . . ? 
C62 C61 H61B 112.9 . . ? 
O61 C61 H61B 112.9 . . ? 
H61A C61 H61B 110.3 . . ? 
C63 C62 C61 111.5(16) . . ? 
C63 C62 H62A 109.3 . . ? 
C61 C62 H62A 109.3 . . ? 
C63 C62 H62B 109.3 . . ? 
C61 C62 H62B 109.3 . . ? 
H62A C62 H62B 108.0 . . ? 
C64 C63 C62 95.1(18) . . ? 
C64 C63 H63A 112.7 . . ? 
C62 C63 H63A 112.7 . . ? 
C64 C63 H63B 112.7 . . ? 
C62 C63 H63B 112.7 . . ? 
H63A C63 H63B 110.2 . . ? 
O61 C64 C63 112.5(17) . . ? 
O61 C64 H64A 109.1 . . ? 
C63 C64 H64A 109.1 . . ? 
O61 C64 H64B 109.1 . . ? 
C63 C64 H64B 109.1 . . ? 
H64A C64 H64B 107.8 . . ? 
 
loop_ 
 _geom_torsion_atom_site_label_1 
 _geom_torsion_atom_site_label_2 
 _geom_torsion_atom_site_label_3 
 _geom_torsion_atom_site_label_4 
 _geom_torsion 
 _geom_torsion_site_symmetry_1 
 _geom_torsion_site_symmetry_2 
 _geom_torsion_site_symmetry_3 
 _geom_torsion_site_symmetry_4 
 _geom_torsion_publ_flag 
C1 Re1 N1 C14 139.4(19) . . . . ? 
C3 Re1 N1 C14 178.3(4) . . . . ? 
C2 Re1 N1 C14 -93.2(4) . . . . ? 
N3 Re1 N1 C14 -0.9(4) . . . . ? 
N2 Re1 N1 C14 83.4(4) . . . . ? 
C1 Re1 N1 C4 22(2) . . . . ? 
C3 Re1 N1 C4 61.2(4) . . . . ? 
C2 Re1 N1 C4 149.8(4) . . . . ? 
N3 Re1 N1 C4 -117.9(4) . . . . ? 
N2 Re1 N1 C4 -33.7(4) . . . . ? 
C1 Re1 N1 C24 -97(2) . . . . ? 
C3 Re1 N1 C24 -57.7(4) . . . . ? 
C2 Re1 N1 C24 30.8(4) . . . . ? 
N3 Re1 N1 C24 123.1(4) . . . . ? 
N2 Re1 N1 C24 -152.6(4) . . . . ? 
C1 Re1 N2 C5 -152.5(3) . . . . ? 
C3 Re1 N2 C5 -68.5(4) . . . . ? 
C2 Re1 N2 C5 47.4(14) . . . . ? 
N1 Re1 N2 C5 22.6(3) . . . . ? 
N3 Re1 N2 C5 103.7(4) . . . . ? 
C1 Re1 N2 C13 24.3(4) . . . . ? 
C3 Re1 N2 C13 108.4(4) . . . . ? 
C2 Re1 N2 C13 -135.7(12) . . . . ? 
N1 Re1 N2 C13 -160.5(4) . . . . ? 
N3 Re1 N2 C13 -79.4(4) . . . . ? 
C1 Re1 N3 C15 -168.8(4) . . . . ? 
C3 Re1 N3 C15 1.5(14) . . . . ? 
C2 Re1 N3 C15 103.8(4) . . . . ? 
N1 Re1 N3 C15 7.4(3) . . . . ? 
N2 Re1 N3 C15 -69.4(3) . . . . ? 
C1 Re1 N3 C23 4.5(4) . . . . ? 
C3 Re1 N3 C23 174.8(11) . . . . ? 
C2 Re1 N3 C23 -83.0(4) . . . . ? 
N1 Re1 N3 C23 -179.3(4) . . . . ? 
N2 Re1 N3 C23 103.9(4) . . . . ? 
C32 Re2 N31 C34 -52.5(4) . . . . ? 
C31 Re2 N31 C34 19(2) . . . . ? 
C33 Re2 N31 C34 -141.0(3) . . . . ? 
N32 Re2 N31 C34 124.0(3) . . . . ? 
N33 Re2 N31 C34 38.2(3) . . . . ? 
C32 Re2 N31 C44 -170.4(3) . . . . ? 
C31 Re2 N31 C44 -99(2) . . . . ? 
C33 Re2 N31 C44 101.2(3) . . . . ? 
N32 Re2 N31 C44 6.1(3) . . . . ? 
N33 Re2 N31 C44 -79.6(3) . . . . ? 
C32 Re2 N31 C54 66.1(4) . . . . ? 
C31 Re2 N31 C54 137(2) . . . . ? 
C33 Re2 N31 C54 -22.3(4) . . . . ? 
N32 Re2 N31 C54 -117.4(3) . . . . ? 
N33 Re2 N31 C54 156.9(4) . . . . ? 
C32 Re2 N32 C45 17.4(16) . . . . ? 
C31 Re2 N32 C45 164.1(3) . . . . ? 
C33 Re2 N32 C45 -107.7(3) . . . . ? 
N33 Re2 N32 C45 64.0(3) . . . . ? 
N31 Re2 N32 C45 -11.1(3) . . . . ? 
C32 Re2 N32 C53 -150.9(14) . . . . ? 
C31 Re2 N32 C53 -4.2(4) . . . . ? 
C33 Re2 N32 C53 84.0(4) . . . . ? 
N33 Re2 N32 C53 -104.3(4) . . . . ? 
N31 Re2 N32 C53 -179.4(4) . . . . ? 
C32 Re2 N33 C35 67.7(3) . . . . ? 
C31 Re2 N33 C35 151.9(3) . . . . ? 
C33 Re2 N33 C35 -20.9(13) . . . . ? 
N32 Re2 N33 C35 -107.0(3) . . . . ? 
N31 Re2 N33 C35 -26.4(3) . . . . ? 
C32 Re2 N33 C43 -108.4(4) . . . . ? 
C31 Re2 N33 C43 -24.2(4) . . . . ? 
C33 Re2 N33 C43 163.0(11) . . . . ? 
N32 Re2 N33 C43 76.9(4) . . . . ? 
N31 Re2 N33 C43 157.5(4) . . . . ? 
C3 Re1 C1 O1 19(5) . . . . ? 
C2 Re1 C1 O1 -70(5) . . . . ? 
N1 Re1 C1 O1 58(6) . . . . ? 
N3 Re1 C1 O1 -162(5) . . . . ? 
N2 Re1 C1 O1 113(5) . . . . ? 
C1 Re1 C2 O2 -162(100) . . . . ? 
C3 Re1 C2 O2 115(100) . . . . ? 
N1 Re1 C2 O2 23(100) . . . . ? 
N3 Re1 C2 O2 -57(100) . . . . ? 
N2 Re1 C2 O2 -1(100) . . . . ? 
C1 Re1 C3 O3 -141(19) . . . . ? 
C2 Re1 C3 O3 -54(19) . . . . ? 
N1 Re1 C3 O3 42(19) . . . . ? 
N3 Re1 C3 O3 48(19) . . . . ? 
N2 Re1 C3 O3 118(19) . . . . ? 
C14 N1 C4 C5 -76.3(6) . . . . ? 
C24 N1 C4 C5 162.8(5) . . . . ? 
Re1 N1 C4 C5 42.3(5) . . . . ? 
C13 N2 C5 C6 -2.9(7) . . . . ? 
Re1 N2 C5 C6 174.3(4) . . . . ? 
C13 N2 C5 C4 178.0(4) . . . . ? 
Re1 N2 C5 C4 -4.8(6) . . . . ? 
N1 C4 C5 N2 -26.2(7) . . . . ? 
N1 C4 C5 C6 154.7(5) . . . . ? 
N2 C5 C6 C7 0.0(8) . . . . ? 
C4 C5 C6 C7 179.1(5) . . . . ? 
C5 C6 C7 C8 2.2(9) . . . . ? 
C6 C7 C8 C9 177.3(6) . . . . ? 
C6 C7 C8 C13 -1.5(8) . . . . ? 
C7 C8 C9 C10 -178.2(6) . . . . ? 
C13 C8 C9 C10 0.6(9) . . . . ? 
C8 C9 C10 C11 0.1(9) . . . . ? 
C9 C10 C11 C12 -0.1(9) . . . . ? 
C10 C11 C12 C13 -0.5(9) . . . . ? 
C5 N2 C13 C12 -175.5(5) . . . . ? 
Re1 N2 C13 C12 7.8(6) . . . . ? 
C5 N2 C13 C8 3.5(7) . . . . ? 
Re1 N2 C13 C8 -173.2(3) . . . . ? 
C11 C12 C13 N2 -179.8(5) . . . . ? 
C11 C12 C13 C8 1.1(8) . . . . ? 
C7 C8 C13 N2 -1.4(7) . . . . ? 
C9 C8 C13 N2 179.8(5) . . . . ? 
C7 C8 C13 C12 177.7(5) . . . . ? 
C9 C8 C13 C12 -1.1(7) . . . . ? 
C4 N1 C14 C15 110.1(5) . . . . ? 
C24 N1 C14 C15 -129.8(6) . . . . ? 
Re1 N1 C14 C15 -5.1(6) . . . . ? 
C23 N3 C15 C16 -4.5(8) . . . . ? 
Re1 N3 C15 C16 169.5(5) . . . . ? 
C23 N3 C15 C14 173.1(5) . . . . ? 
Re1 N3 C15 C14 -13.0(6) . . . . ? 
N1 C14 C15 N3 12.5(8) . . . . ? 
N1 C14 C15 C16 -169.8(6) . . . . ? 
N3 C15 C16 C17 -2.6(10) . . . . ? 
C14 C15 C16 C17 179.8(7) . . . . ? 
C15 C16 C17 C18 5.6(11) . . . . ? 
C16 C17 C18 C23 -1.7(11) . . . . ? 
C16 C17 C18 C19 175.8(7) . . . . ? 
C17 C18 C19 C20 -179.3(7) . . . . ? 
C23 C18 C19 C20 -1.8(10) . . . . ? 
C18 C19 C20 C21 5.1(11) . . . . ? 
C19 C20 C21 C22 -4.3(10) . . . . ? 
C20 C21 C22 C23 0.0(8) . . . . ? 
C21 C22 C23 N3 -176.4(5) . . . . ? 
C21 C22 C23 C18 3.2(8) . . . . ? 
C15 N3 C23 C22 -172.2(5) . . . . ? 
Re1 N3 C23 C22 14.8(6) . . . . ? 
C15 N3 C23 C18 8.2(7) . . . . ? 
Re1 N3 C23 C18 -164.8(4) . . . . ? 
C17 C18 C23 C22 175.2(6) . . . . ? 
C19 C18 C23 C22 -2.4(8) . . . . ? 
C17 C18 C23 N3 -5.2(8) . . . . ? 
C19 C18 C23 N3 177.2(5) . . . . ? 
C14 N1 C24 C25 -62.0(8) . . . . ? 
C4 N1 C24 C25 57.4(8) . . . . ? 
Re1 N1 C24 C25 173.9(5) . . . . ? 
N1 C24 C25 C26 -117.1(9) . . . . ? 
C32 Re2 C31 O31 -26(7) . . . . ? 
C33 Re2 C31 O31 63(7) . . . . ? 
N32 Re2 C31 O31 159(7) . . . . ? 
N33 Re2 C31 O31 -116(7) . . . . ? 
N31 Re2 C31 O31 -97(7) . . . . ? 
C31 Re2 C32 O32 53(18) . . . . ? 
C33 Re2 C32 O32 -34(18) . . . . ? 
N32 Re2 C32 O32 -160(17) . . . . ? 
N33 Re2 C32 O32 154(18) . . . . ? 
N31 Re2 C32 O32 -132(18) . . . . ? 
C32 Re2 C33 O33 4(11) . . . . ? 
C31 Re2 C33 O33 -80(11) . . . . ? 
N32 Re2 C33 O33 178(100) . . . . ? 
N33 Re2 C33 O33 93(11) . . . . ? 
N31 Re2 C33 O33 98(11) . . . . ? 
C44 N31 C34 C35 71.4(5) . . . . ? 
C54 N31 C34 C35 -168.4(4) . . . . ? 
Re2 N31 C34 C35 -46.9(5) . . . . ? 
C43 N33 C35 C36 4.8(7) . . . . ? 
Re2 N33 C35 C36 -171.7(4) . . . . ? 
C43 N33 C35 C34 -176.0(4) . . . . ? 
Re2 N33 C35 C34 7.5(5) . . . . ? 
N31 C34 C35 N33 27.7(6) . . . . ? 
N31 C34 C35 C36 -153.1(5) . . . . ? 
N33 C35 C36 C37 -2.1(8) . . . . ? 
C34 C35 C36 C37 178.7(5) . . . . ? 
C35 C36 C37 C38 -1.1(8) . . . . ? 
C36 C37 C38 C39 -177.8(5) . . . . ? 
C36 C37 C38 C43 1.5(8) . . . . ? 
C37 C38 C39 C40 179.6(6) . . . . ? 
C43 C38 C39 C40 0.3(8) . . . . ? 
C38 C39 C40 C41 -3.1(9) . . . . ? 
C39 C40 C41 C42 4.0(9) . . . . ? 
C40 C41 C42 C43 -2.1(8) . . . . ? 
C41 C42 C43 N33 -179.5(5) . . . . ? 
C41 C42 C43 C38 -0.6(7) . . . . ? 
C35 N33 C43 C42 174.7(4) . . . . ? 
Re2 N33 C43 C42 -9.4(6) . . . . ? 
C35 N33 C43 C38 -4.3(6) . . . . ? 
Re2 N33 C43 C38 171.7(3) . . . . ? 
C39 C38 C43 C42 1.5(7) . . . . ? 
C37 C38 C43 C42 -177.8(5) . . . . ? 
C39 C38 C43 N33 -179.5(4) . . . . ? 
C37 C38 C43 N33 1.2(7) . . . . ? 
C34 N31 C44 C45 -115.8(5) . . . . ? 
C54 N31 C44 C45 124.3(5) . . . . ? 
Re2 N31 C44 C45 -1.2(5) . . . . ? 
C53 N32 C45 C46 1.4(7) . . . . ? 
Re2 N32 C45 C46 -167.8(4) . . . . ? 
C53 N32 C45 C44 -176.3(4) . . . . ? 
Re2 N32 C45 C44 14.5(5) . . . . ? 
N31 C44 C45 N32 -9.1(7) . . . . ? 
N31 C44 C45 C46 173.1(4) . . . . ? 
N32 C45 C46 C47 5.8(9) . . . . ? 
C44 C45 C46 C47 -176.4(5) . . . . ? 
C45 C46 C47 C48 -7.7(9) . . . . ? 
C46 C47 C48 C49 -177.1(6) . . . . ? 
C46 C47 C48 C53 2.7(8) . . . . ? 
C47 C48 C49 C50 178.6(6) . . . . ? 
C53 C48 C49 C50 -1.1(8) . . . . ? 
C48 C49 C50 C51 -3.6(9) . . . . ? 
C49 C50 C51 C52 3.5(9) . . . . ? 
C50 C51 C52 C53 1.5(8) . . . . ? 
C51 C52 C53 N32 175.7(5) . . . . ? 
C51 C52 C53 C48 -6.3(7) . . . . ? 
C45 N32 C53 C52 171.6(4) . . . . ? 
Re2 N32 C53 C52 -20.7(6) . . . . ? 
C45 N32 C53 C48 -6.5(7) . . . . ? 
Re2 N32 C53 C48 161.2(3) . . . . ? 
C49 C48 C53 C52 6.1(7) . . . . ? 
C47 C48 C53 C52 -173.6(5) . . . . ? 
C49 C48 C53 N32 -175.8(4) . . . . ? 
C47 C48 C53 N32 4.5(7) . . . . ? 
C34 N31 C54 C55 -58.3(6) . . . . ? 
C44 N31 C54 C55 61.8(6) . . . . ? 
Re2 N31 C54 C55 -174.3(4) . . . . ? 
N31 C54 C55 C56 114.6(7) . . . . ? 
C64 O61 C61 C62 -16.8(19) . . . . ? 
O61 C61 C62 C63 39(2) . . . . ? 
C61 C62 C63 C64 -44(2) . . . . ? 
C61 O61 C64 C63 -9(2) . . . . ? 
C62 C63 C64 O61 31(2) . . . . ? 
 
_diffrn_measured_fraction_theta_max    1.000 
_diffrn_reflns_theta_full              30.51 
_diffrn_measured_fraction_theta_full   1.000 
_refine_diff_density_max    1.866 
_refine_diff_density_min   -1.011 
_refine_diff_density_rms    0.107 
