# Supplementary material
Source: MDPI journal article supplement (https://www.mdpi.com/2304-6740/7/11/134)
Supplement: s1 [file s1 › maw281116.cif]

 
data_c:\maw281116 
 
_audit_creation_method            SHELXL-97 
_chemical_name_systematic 
; 
 ? 
; 
_chemical_name_common              [Re(CO)3(tertcarboxySAAC)]PF6  
_chemical_melting_point           ? 
_chemical_formula_moiety          'C33 H35 F6 N3 O6 P Re'
_chemical_formula_sum 
 'C33 H35 F6 N3 O6 P Re' 
_chemical_formula_weight          900.81 
 
loop_ 
 _atom_type_symbol 
 _atom_type_description 
 _atom_type_scat_dispersion_real 
 _atom_type_scat_dispersion_imag 
 _atom_type_scat_source 
 'C'  'C'   0.0033   0.0016 
 'International Tables Vol C Tables 4.2.6.8 and 6.1.1.4' 
 'H'  'H'   0.0000   0.0000 
 'International Tables Vol C Tables 4.2.6.8 and 6.1.1.4' 
 'N'  'N'   0.0061   0.0033 
 'International Tables Vol C Tables 4.2.6.8 and 6.1.1.4' 
 'O'  'O'   0.0106   0.0060 
 'International Tables Vol C Tables 4.2.6.8 and 6.1.1.4' 
 'F'  'F'   0.0171   0.0103 
 'International Tables Vol C Tables 4.2.6.8 and 6.1.1.4' 
 'P'  'P'   0.1023   0.0942 
 'International Tables Vol C Tables 4.2.6.8 and 6.1.1.4' 
 'Re'  'Re'  -1.0185   7.2310 
 'International Tables Vol C Tables 4.2.6.8 and 6.1.1.4' 
 
_symmetry_cell_setting            triclinic 
_symmetry_space_group_name_H-M    P-1
 
loop_ 
 _symmetry_equiv_pos_as_xyz 
 'x, y, z' 
 '-x, -y, -z' 
 
_cell_length_a                    11.7074(3) 
_cell_length_b                    12.2413(4) 
_cell_length_c                    12.8682(3) 
_cell_angle_alpha                 89.647(2) 
_cell_angle_beta                  75.623(2) 
_cell_angle_gamma                 88.455(2) 
_cell_volume                      1785.79(9) 
_cell_formula_units_Z             2 
_cell_measurement_temperature     183(2) 
_cell_measurement_reflns_used     12253
_cell_measurement_theta_min       2.6950
_cell_measurement_theta_max       29.0520 
 
_exptl_crystal_description        stick
_exptl_crystal_colour             colorless 
_exptl_crystal_size_max           0.28 
_exptl_crystal_size_mid           0.10 
_exptl_crystal_size_min           0.07 
_exptl_crystal_density_meas       ? 
_exptl_crystal_density_diffrn     1.675 
_exptl_crystal_density_method     'not measured' 
_exptl_crystal_F_000              892 
_exptl_absorpt_coefficient_mu     3.525 
_exptl_absorpt_correction_type    multi-scan  
_exptl_absorpt_correction_T_min   0.4353 
_exptl_absorpt_correction_T_max   0.7804 
_exptl_absorpt_process_details    
;
CrysAlisPro 1.171.38.43 (Rigaku Oxford Diffraction, 2015)
Empirical absorption correction using spherical harmonics,
 implemented in SCALE3 ABSPACK scaling algorithm.
; 
 _exptl_special_details 
; 
 ? 
; 
 
_diffrn_ambient_temperature       183(2) 
_diffrn_radiation_wavelength      0.71073 
_diffrn_radiation_type            MoK\a 
_diffrn_radiation_source          'fine-focus sealed tube' 
_diffrn_radiation_monochromator   graphite 
_diffrn_measurement_device_type   'Xcalibur, Ruby' 
_diffrn_measurement_method        '\w scans' 
_diffrn_detector_area_resol_mean   10.4498
_diffrn_standards_number          ? 
_diffrn_standards_interval_count  ? 
_diffrn_standards_interval_time   ? 
_diffrn_standards_decay_%         ? 
_diffrn_reflns_number             37899 
_diffrn_reflns_av_R_equivalents   0.0642 
_diffrn_reflns_av_sigmaI/netI     0.0595 
_diffrn_reflns_limit_h_min        -15 
_diffrn_reflns_limit_h_max        16 
_diffrn_reflns_limit_k_min        -16 
_diffrn_reflns_limit_k_max        16 
_diffrn_reflns_limit_l_min        -17 
_diffrn_reflns_limit_l_max        17 
_diffrn_reflns_theta_min          2.33 
_diffrn_reflns_theta_max          29.57 
_reflns_number_total              9941 
_reflns_number_gt                 8439 
_reflns_threshold_expression      >2sigma(I) 
 
_computing_data_collection        'CrysAlis RED (Oxford, 2007)'  
_computing_cell_refinement        'CrysAlis RED (Oxford, 2007)' 
_computing_data_reduction         'CrysAlis RED (Oxford, 2007)'  
_computing_structure_solution     'SHELXS-97 (Sheldrick, 1990)' 
_computing_structure_refinement   'SHELXL-97 (Sheldrick, 1997)' 
_computing_molecular_graphics     'ORTEP-3 (Farrugia, 1997)' 
_computing_publication_material   'SHELXL-97 (Sheldrick, 1997)'  
 
_refine_special_details 
; 
 Refinement of F^2^ against ALL reflections.  The weighted R-factor wR and 
 goodness of fit S are based on F^2^, conventional R-factors R are based 
 on F, with F set to zero for negative F^2^. The threshold expression of 
 F^2^ > 2sigma(F^2^) is used only for calculating R-factors(gt) etc. and is 
 not relevant to the choice of reflections for refinement.  R-factors based 
 on F^2^ are statistically about twice as large as those based on F, and R- 
 factors based on ALL data will be even larger. 
; 
 
_refine_ls_structure_factor_coef  Fsqd  
_refine_ls_matrix_type            full 
_refine_ls_weighting_scheme       calc  
_refine_ls_weighting_details 
 'calc w=1/[\s^2^(Fo^2^)+(0.0365P)^2^+0.0000P] where P=(Fo^2^+2Fc^2^)/3' 
_atom_sites_solution_primary      direct 
_atom_sites_solution_secondary    difmap 
_atom_sites_solution_hydrogens    geom 
_refine_ls_hydrogen_treatment     constr 
_refine_ls_extinction_method      none 
_refine_ls_extinction_coef        ? 
_refine_ls_number_reflns          9941 
_refine_ls_number_parameters      454 
_refine_ls_number_restraints      0 
_refine_ls_R_factor_all           0.0498 
_refine_ls_R_factor_gt            0.0378 
_refine_ls_wR_factor_ref          0.0852 
_refine_ls_wR_factor_gt           0.0789 
_refine_ls_goodness_of_fit_ref    1.029 
_refine_ls_restrained_S_all       1.029 
_refine_ls_shift/su_max           0.001 
_refine_ls_shift/su_mean          0.000 
 
loop_ 
 _atom_site_label 
 _atom_site_type_symbol 
 _atom_site_fract_x 
 _atom_site_fract_y 
 _atom_site_fract_z 
 _atom_site_U_iso_or_equiv 
 _atom_site_adp_type 
 _atom_site_occupancy 
 _atom_site_symmetry_multiplicity 
 _atom_site_calc_flag 
 _atom_site_refinement_flags 
 _atom_site_disorder_assembly 
 _atom_site_disorder_group 
Re1 Re 0.189367(11) 0.368178(11) 0.382900(11) 0.02682(5) Uani 1 1 d . . . 
C1 C 0.1430(3) 0.4029(3) 0.5327(3) 0.0305(8) Uani 1 1 d . . . 
O1 O 0.1178(3) 0.4287(2) 0.6211(2) 0.0427(7) Uani 1 1 d . . . 
C2 C 0.0265(3) 0.3499(3) 0.3856(3) 0.0320(8) Uani 1 1 d . . . 
O2 O -0.0705(2) 0.3351(2) 0.3890(2) 0.0436(7) Uani 1 1 d . . . 
C3 C 0.1670(3) 0.5229(3) 0.3642(3) 0.0326(8) Uani 1 1 d . . . 
O3 O 0.1507(3) 0.6143(2) 0.3547(2) 0.0445(7) Uani 1 1 d . . . 
N1 N 0.2734(3) 0.3384(2) 0.2096(2) 0.0305(6) Uani 1 1 d . . . 
N2 N 0.3831(2) 0.3743(2) 0.3645(2) 0.0254(6) Uani 1 1 d . . . 
N3 N 0.2140(3) 0.1880(2) 0.3802(2) 0.0302(6) Uani 1 1 d . . . 
C4 C 0.3733(3) 0.4158(3) 0.1850(3) 0.0336(8) Uani 1 1 d . . . 
H4B H 0.4254 0.3987 0.1135 0.040 Uiso 1 1 calc R . . 
H4A H 0.3419 0.4915 0.1833 0.040 Uiso 1 1 calc R . . 
C5 C 0.4419(3) 0.4068(3) 0.2676(3) 0.0303(7) Uani 1 1 d . . . 
C6 C 0.5621(3) 0.4324(3) 0.2411(3) 0.0355(8) Uani 1 1 d . . . 
H6A H 0.6000 0.4548 0.1705 0.043 Uiso 1 1 calc R . . 
C7 C 0.6233(4) 0.4245(3) 0.3183(3) 0.0367(9) Uani 1 1 d . . . 
H7A H 0.7033 0.4451 0.3031 0.044 Uiso 1 1 calc R . . 
C8 C 0.5666(3) 0.3855(3) 0.4207(3) 0.0301(7) Uani 1 1 d . . . 
C9 C 0.6274(3) 0.3708(3) 0.5022(3) 0.0375(9) Uani 1 1 d . . . 
H9A H 0.7083 0.3884 0.4884 0.045 Uiso 1 1 calc R . . 
C10 C 0.5714(4) 0.3319(3) 0.5995(3) 0.0394(9) Uani 1 1 d . . . 
H10A H 0.6126 0.3242 0.6542 0.047 Uiso 1 1 calc R . . 
C11 C 0.4529(4) 0.3029(3) 0.6198(3) 0.0375(9) Uani 1 1 d . . . 
H11A H 0.4149 0.2740 0.6880 0.045 Uiso 1 1 calc R . . 
C12 C 0.3913(3) 0.3154(3) 0.5432(3) 0.0324(8) Uani 1 1 d . . . 
H12A H 0.3113 0.2946 0.5582 0.039 Uiso 1 1 calc R . . 
C13 C 0.4455(3) 0.3591(3) 0.4419(3) 0.0269(7) Uani 1 1 d . . . 
C14 C 0.3231(3) 0.2233(3) 0.1953(3) 0.0344(8) Uani 1 1 d . . . 
H14B H 0.3102 0.1934 0.1279 0.041 Uiso 1 1 calc R . . 
H14A H 0.4093 0.2251 0.1875 0.041 Uiso 1 1 calc R . . 
C15 C 0.2706(3) 0.1480(3) 0.2855(3) 0.0331(8) Uani 1 1 d . . . 
C16 C 0.2917(4) 0.0357(3) 0.2656(4) 0.0445(10) Uani 1 1 d . . . 
H16A H 0.3317 0.0105 0.1960 0.053 Uiso 1 1 calc R . . 
C17 C 0.2547(4) -0.0363(3) 0.3461(4) 0.0527(12) Uani 1 1 d . . . 
H17A H 0.2714 -0.1122 0.3339 0.063 Uiso 1 1 calc R . . 
C18 C 0.1920(4) 0.0005(3) 0.4469(4) 0.0429(10) Uani 1 1 d . . . 
C19 C 0.1466(4) -0.0716(4) 0.5321(4) 0.0544(12) Uani 1 1 d . . . 
H19A H 0.1620 -0.1478 0.5216 0.065 Uiso 1 1 calc R . . 
C20 C 0.0819(5) -0.0356(4) 0.6284(5) 0.0602(14) Uani 1 1 d . . . 
H20A H 0.0532 -0.0855 0.6851 0.072 Uiso 1 1 calc R . . 
C21 C 0.0579(5) 0.0771(4) 0.6431(4) 0.0538(12) Uani 1 1 d . . . 
H21A H 0.0106 0.1031 0.7098 0.065 Uiso 1 1 calc R . . 
C22 C 0.1014(4) 0.1504(3) 0.5629(3) 0.0413(9) Uani 1 1 d . . . 
H22A H 0.0845 0.2263 0.5750 0.050 Uiso 1 1 calc R . . 
C23 C 0.1700(3) 0.1146(3) 0.4638(3) 0.0356(8) Uani 1 1 d . . . 
C24 C 0.2073(4) 0.3648(3) 0.1273(3) 0.0378(9) Uani 1 1 d . . . 
H24B H 0.2636 0.3632 0.0558 0.045 Uiso 1 1 calc R . . 
H24A H 0.1747 0.4405 0.1398 0.045 Uiso 1 1 calc R . . 
C25 C 0.1079(4) 0.2905(3) 0.1248(3) 0.0383(9) Uani 1 1 d . . . 
C26 C -0.0402(5) 0.2754(5) 0.0181(4) 0.0587(13) Uani 1 1 d . . . 
C27 C -0.0214(6) 0.1562(5) -0.0022(5) 0.0772(18) Uani 1 1 d . . . 
H27A H -0.0859 0.1283 -0.0298 0.093 Uiso 1 1 calc R . . 
H27B H -0.0196 0.1186 0.0649 0.093 Uiso 1 1 calc R . . 
H27C H 0.0538 0.1429 -0.0551 0.093 Uiso 1 1 calc R . . 
C28 C -0.1427(5) 0.3021(6) 0.1101(6) 0.098(2) Uani 1 1 d . . . 
H28A H -0.1313 0.2659 0.1750 0.118 Uiso 1 1 calc R . . 
H28B H -0.2152 0.2766 0.0943 0.118 Uiso 1 1 calc R . . 
H28C H -0.1490 0.3814 0.1214 0.118 Uiso 1 1 calc R . . 
C29 C -0.0469(7) 0.3348(6) -0.0828(6) 0.109(3) Uani 1 1 d . . . 
H29C H -0.0556 0.4135 -0.0687 0.131 Uiso 1 1 calc R . . 
H29B H -0.1150 0.3098 -0.1068 0.131 Uiso 1 1 calc R . . 
H29A H 0.0254 0.3197 -0.1388 0.131 Uiso 1 1 calc R . . 
C30 C 0.3282(6) 0.0220(5) -0.2300(5) 0.0809(18) Uani 1 1 d . . . 
H30A H 0.3394 0.0907 -0.1939 0.097 Uiso 1 1 calc R . . 
H30B H 0.2432 0.0146 -0.2258 0.097 Uiso 1 1 calc R . . 
C31 C 0.3730(8) -0.0702(9) -0.1818(7) 0.148(4) Uani 1 1 d . . . 
H31A H 0.4239 -0.0450 -0.1362 0.177 Uiso 1 1 calc R . . 
H31B H 0.3067 -0.1101 -0.1358 0.177 Uiso 1 1 calc R . . 
O32 O 0.4394(4) -0.1411(3) -0.2639(4) 0.0897(14) Uani 1 1 d . . . 
C33 C 0.4359(7) -0.0964(5) -0.3622(5) 0.090(2) Uani 1 1 d . . . 
H33A H 0.3789 -0.1356 -0.3929 0.109 Uiso 1 1 calc R . . 
H33B H 0.5147 -0.1029 -0.4129 0.109 Uiso 1 1 calc R . . 
O4 O 0.0737(3) 0.2169(2) 0.1854(2) 0.0469(7) Uani 1 1 d . . . 
O5 O 0.0665(3) 0.3227(3) 0.0420(3) 0.0539(8) Uani 1 1 d . . . 
C34 C 0.3989(5) 0.0209(4) -0.3446(4) 0.0627(14) Uani 1 1 d . . . 
H34A H 0.3502 0.0452 -0.3937 0.075 Uiso 1 1 calc R . . 
H34B H 0.4681 0.0682 -0.3546 0.075 Uiso 1 1 calc R . . 
P1 P -0.42209(11) 0.24404(10) -0.08807(9) 0.0459(3) Uani 1 1 d . . . 
F1 F -0.5041(4) 0.1588(4) -0.0172(3) 0.137(2) Uani 1 1 d . . . 
F2 F -0.3130(3) 0.1644(3) -0.0907(3) 0.0787(9) Uani 1 1 d . . . 
F3 F -0.4025(3) 0.2980(3) 0.0167(3) 0.0982(13) Uani 1 1 d . . . 
F4 F -0.3367(4) 0.3231(3) -0.1621(3) 0.1136(15) Uani 1 1 d . . . 
F5 F -0.5285(4) 0.3249(4) -0.0853(4) 0.146(2) Uani 1 1 d . . . 
F6 F -0.4459(3) 0.1863(2) -0.1915(2) 0.0631(7) Uani 1 1 d . . . 
 
loop_ 
 _atom_site_aniso_label 
 _atom_site_aniso_U_11 
 _atom_site_aniso_U_22 
 _atom_site_aniso_U_33 
 _atom_site_aniso_U_23 
 _atom_site_aniso_U_13 
 _atom_site_aniso_U_12 
Re1 0.02312(8) 0.02535(8) 0.03224(8) -0.00015(5) -0.00754(6) 0.00129(5) 
C1 0.0318(19) 0.0249(18) 0.037(2) -0.0012(14) -0.0138(16) 0.0026(14) 
O1 0.0449(17) 0.0437(17) 0.0363(15) -0.0072(12) -0.0047(13) 0.0061(13) 
C2 0.032(2) 0.0237(18) 0.041(2) -0.0001(14) -0.0101(16) -0.0001(14) 
O2 0.0263(14) 0.0435(17) 0.0610(19) -0.0030(13) -0.0106(13) 0.0010(12) 
C3 0.0259(18) 0.033(2) 0.038(2) -0.0005(15) -0.0056(15) 0.0019(14) 
O3 0.0407(16) 0.0289(15) 0.0629(19) 0.0073(13) -0.0116(14) 0.0017(12) 
N1 0.0314(16) 0.0343(17) 0.0269(15) 0.0004(12) -0.0093(13) 0.0020(13) 
N2 0.0232(14) 0.0222(14) 0.0309(15) -0.0026(11) -0.0073(12) 0.0013(11) 
N3 0.0291(16) 0.0239(15) 0.0375(17) 0.0017(12) -0.0082(13) 0.0012(12) 
C4 0.0323(19) 0.036(2) 0.0306(19) 0.0053(14) -0.0045(16) -0.0057(15) 
C5 0.0324(19) 0.0260(18) 0.0321(18) -0.0047(13) -0.0071(15) 0.0003(14) 
C6 0.0291(19) 0.039(2) 0.037(2) -0.0047(16) -0.0046(16) -0.0033(15) 
C7 0.034(2) 0.032(2) 0.040(2) -0.0057(15) -0.0018(17) -0.0012(15) 
C8 0.0231(17) 0.0307(19) 0.0374(19) -0.0075(14) -0.0092(15) 0.0033(13) 
C9 0.0301(19) 0.035(2) 0.051(2) -0.0074(17) -0.0163(18) 0.0025(15) 
C10 0.042(2) 0.035(2) 0.048(2) -0.0032(17) -0.025(2) 0.0032(17) 
C11 0.041(2) 0.033(2) 0.041(2) 0.0025(16) -0.0153(18) 0.0007(16) 
C12 0.0322(19) 0.0304(19) 0.037(2) 0.0020(14) -0.0125(16) 0.0016(15) 
C13 0.0248(17) 0.0213(16) 0.0355(19) -0.0053(13) -0.0096(15) 0.0019(13) 
C14 0.036(2) 0.035(2) 0.0336(19) -0.0052(15) -0.0110(16) 0.0054(16) 
C15 0.0308(19) 0.0296(19) 0.042(2) -0.0008(15) -0.0143(17) 0.0002(15) 
C16 0.042(2) 0.031(2) 0.059(3) -0.0082(18) -0.008(2) 0.0018(17) 
C17 0.050(3) 0.024(2) 0.083(3) -0.001(2) -0.014(3) 0.0018(18) 
C18 0.039(2) 0.031(2) 0.063(3) 0.0114(18) -0.021(2) -0.0061(17) 
C19 0.053(3) 0.036(2) 0.079(4) 0.016(2) -0.027(3) -0.009(2) 
C20 0.058(3) 0.056(3) 0.074(4) 0.028(3) -0.028(3) -0.024(2) 
C21 0.064(3) 0.056(3) 0.044(3) 0.012(2) -0.015(2) -0.025(2) 
C22 0.042(2) 0.042(2) 0.041(2) 0.0067(17) -0.0119(19) -0.0123(18) 
C23 0.031(2) 0.034(2) 0.045(2) 0.0064(16) -0.0162(17) -0.0050(15) 
C24 0.037(2) 0.042(2) 0.036(2) 0.0044(16) -0.0144(18) -0.0001(17) 
C25 0.035(2) 0.045(2) 0.038(2) -0.0036(17) -0.0143(18) 0.0017(17) 
C26 0.054(3) 0.069(3) 0.065(3) -0.006(3) -0.036(3) -0.003(2) 
C27 0.084(4) 0.071(4) 0.088(4) -0.022(3) -0.042(4) -0.007(3) 
C28 0.049(3) 0.134(6) 0.120(6) -0.052(5) -0.036(4) 0.021(4) 
C29 0.121(6) 0.122(6) 0.122(6) 0.036(5) -0.098(5) -0.026(5) 
C30 0.088(5) 0.081(5) 0.082(4) -0.004(3) -0.036(4) 0.008(3) 
C31 0.110(7) 0.177(10) 0.125(8) 0.082(7) 0.023(6) 0.027(7) 
O32 0.098(4) 0.060(3) 0.125(4) 0.031(3) -0.055(3) 0.004(2) 
C33 0.136(6) 0.053(4) 0.107(5) -0.014(3) -0.078(5) 0.018(4) 
O4 0.0424(17) 0.0546(19) 0.0472(17) 0.0031(14) -0.0165(14) -0.0116(14) 
O5 0.055(2) 0.062(2) 0.0566(19) 0.0090(15) -0.0345(17) -0.0081(15) 
C34 0.086(4) 0.038(3) 0.073(4) 0.005(2) -0.037(3) 0.006(2) 
P1 0.0504(7) 0.0522(7) 0.0333(6) -0.0064(5) -0.0080(5) 0.0066(5) 
F1 0.129(4) 0.220(5) 0.060(2) 0.036(3) -0.010(2) -0.092(4) 
F2 0.090(2) 0.073(2) 0.080(2) -0.0157(17) -0.0374(19) 0.0291(18) 
F3 0.094(3) 0.129(3) 0.083(2) -0.067(2) -0.048(2) 0.041(2) 
F4 0.156(4) 0.077(3) 0.116(3) 0.042(2) -0.045(3) -0.057(3) 
F5 0.136(4) 0.179(5) 0.152(4) -0.109(3) -0.100(3) 0.110(3) 
F6 0.077(2) 0.0672(19) 0.0470(15) -0.0092(13) -0.0194(15) 0.0053(15) 
 
_geom_special_details 
; 
 All esds (except the esd in the dihedral angle between two l.s. planes) 
 are estimated using the full covariance matrix.  The cell esds are taken 
 into account individually in the estimation of esds in distances, angles 
 and torsion angles; correlations between esds in cell parameters are only 
 used when they are defined by crystal symmetry.  An approximate (isotropic) 
 treatment of cell esds is used for estimating esds involving l.s. planes. 
; 
 
loop_ 
 _geom_bond_atom_site_label_1 
 _geom_bond_atom_site_label_2 
 _geom_bond_distance 
 _geom_bond_site_symmetry_2 
 _geom_bond_publ_flag 
Re1 C1 1.915(4) . ? 
Re1 C2 1.918(4) . ? 
Re1 C3 1.927(4) . ? 
Re1 N3 2.216(3) . ? 
Re1 N2 2.224(3) . ? 
Re1 N1 2.230(3) . ? 
C1 O1 1.146(4) . ? 
C2 O2 1.144(4) . ? 
C3 O3 1.141(4) . ? 
N1 C24 1.489(5) . ? 
N1 C4 1.495(4) . ? 
N1 C14 1.504(5) . ? 
N2 C5 1.331(4) . ? 
N2 C13 1.382(4) . ? 
N3 C15 1.323(5) . ? 
N3 C23 1.403(4) . ? 
C4 C5 1.485(5) . ? 
C5 C6 1.406(5) . ? 
C6 C7 1.362(6) . ? 
C7 C8 1.408(5) . ? 
C8 C9 1.414(5) . ? 
C8 C13 1.421(5) . ? 
C9 C10 1.351(6) . ? 
C10 C11 1.402(6) . ? 
C11 C12 1.364(5) . ? 
C12 C13 1.409(5) . ? 
C14 C15 1.497(5) . ? 
C15 C16 1.405(5) . ? 
C16 C17 1.350(6) . ? 
C17 C18 1.393(6) . ? 
C18 C19 1.411(6) . ? 
C18 C23 1.422(6) . ? 
C19 C20 1.351(7) . ? 
C20 C21 1.405(7) . ? 
C21 C22 1.372(5) . ? 
C22 C23 1.393(6) . ? 
C24 C25 1.503(5) . ? 
C25 O4 1.197(5) . ? 
C25 O5 1.330(5) . ? 
C26 C27 1.486(8) . ? 
C26 O5 1.490(6) . ? 
C26 C28 1.492(8) . ? 
C26 C29 1.502(8) . ? 
C30 C31 1.433(9) . ? 
C30 C34 1.501(8) . ? 
C31 O32 1.428(10) . ? 
O32 C33 1.385(7) . ? 
C33 C34 1.491(7) . ? 
P1 F4 1.553(4) . ? 
P1 F5 1.564(4) . ? 
P1 F1 1.566(4) . ? 
P1 F3 1.574(3) . ? 
P1 F2 1.579(3) . ? 
P1 F6 1.599(3) . ? 
 
loop_ 
 _geom_angle_atom_site_label_1 
 _geom_angle_atom_site_label_2 
 _geom_angle_atom_site_label_3 
 _geom_angle 
 _geom_angle_site_symmetry_1 
 _geom_angle_site_symmetry_3 
 _geom_angle_publ_flag 
C1 Re1 C2 88.94(16) . . ? 
C1 Re1 C3 84.06(15) . . ? 
C2 Re1 C3 88.68(15) . . ? 
C1 Re1 N3 103.76(13) . . ? 
C2 Re1 N3 89.04(13) . . ? 
C3 Re1 N3 171.82(13) . . ? 
C1 Re1 N2 96.89(13) . . ? 
C2 Re1 N2 173.19(13) . . ? 
C3 Re1 N2 95.40(13) . . ? 
N3 Re1 N2 86.17(10) . . ? 
C1 Re1 N1 170.16(13) . . ? 
C2 Re1 N1 100.68(14) . . ? 
C3 Re1 N1 94.00(13) . . ? 
N3 Re1 N1 78.71(11) . . ? 
N2 Re1 N1 73.64(11) . . ? 
O1 C1 Re1 176.6(3) . . ? 
O2 C2 Re1 177.3(3) . . ? 
O3 C3 Re1 178.2(3) . . ? 
C24 N1 C4 103.6(3) . . ? 
C24 N1 C14 110.5(3) . . ? 
C4 N1 C14 108.8(3) . . ? 
C24 N1 Re1 120.1(2) . . ? 
C4 N1 Re1 103.7(2) . . ? 
C14 N1 Re1 109.3(2) . . ? 
C5 N2 C13 117.9(3) . . ? 
C5 N2 Re1 113.2(2) . . ? 
C13 N2 Re1 128.5(2) . . ? 
C15 N3 C23 118.5(3) . . ? 
C15 N3 Re1 114.0(2) . . ? 
C23 N3 Re1 127.3(3) . . ? 
C5 C4 N1 110.2(3) . . ? 
N2 C5 C6 123.8(3) . . ? 
N2 C5 C4 116.2(3) . . ? 
C6 C5 C4 120.0(3) . . ? 
C7 C6 C5 119.1(4) . . ? 
C6 C7 C8 119.3(4) . . ? 
C7 C8 C9 121.7(3) . . ? 
C7 C8 C13 118.9(3) . . ? 
C9 C8 C13 119.4(3) . . ? 
C10 C9 C8 120.6(4) . . ? 
C9 C10 C11 120.2(4) . . ? 
C12 C11 C10 120.9(4) . . ? 
C11 C12 C13 120.5(4) . . ? 
N2 C13 C12 120.9(3) . . ? 
N2 C13 C8 120.8(3) . . ? 
C12 C13 C8 118.2(3) . . ? 
C15 C14 N1 114.2(3) . . ? 
N3 C15 C16 123.1(3) . . ? 
N3 C15 C14 120.3(3) . . ? 
C16 C15 C14 116.4(3) . . ? 
C17 C16 C15 119.5(4) . . ? 
C16 C17 C18 120.1(4) . . ? 
C17 C18 C19 122.3(4) . . ? 
C17 C18 C23 119.0(4) . . ? 
C19 C18 C23 118.7(4) . . ? 
C20 C19 C18 122.0(5) . . ? 
C19 C20 C21 118.8(4) . . ? 
C22 C21 C20 121.2(5) . . ? 
C21 C22 C23 120.6(4) . . ? 
C22 C23 N3 121.6(3) . . ? 
C22 C23 C18 118.6(4) . . ? 
N3 C23 C18 119.7(4) . . ? 
N1 C24 C25 115.6(3) . . ? 
O4 C25 O5 127.3(4) . . ? 
O4 C25 C24 126.6(4) . . ? 
O5 C25 C24 106.1(3) . . ? 
C27 C26 O5 110.2(4) . . ? 
C27 C26 C28 113.1(5) . . ? 
O5 C26 C28 107.7(4) . . ? 
C27 C26 C29 110.6(5) . . ? 
O5 C26 C29 102.0(4) . . ? 
C28 C26 C29 112.6(6) . . ? 
C31 C30 C34 104.7(6) . . ? 
O32 C31 C30 109.5(7) . . ? 
C33 O32 C31 108.1(5) . . ? 
O32 C33 C34 107.7(5) . . ? 
C25 O5 C26 122.7(3) . . ? 
C33 C34 C30 102.6(5) . . ? 
F4 P1 F5 90.7(3) . . ? 
F4 P1 F1 176.7(3) . . ? 
F5 P1 F1 91.9(3) . . ? 
F4 P1 F3 92.5(2) . . ? 
F5 P1 F3 90.14(19) . . ? 
F1 P1 F3 89.5(2) . . ? 
F4 P1 F2 88.4(2) . . ? 
F5 P1 F2 178.8(3) . . ? 
F1 P1 F2 89.0(3) . . ? 
F3 P1 F2 89.17(18) . . ? 
F4 P1 F6 89.7(2) . . ? 
F5 P1 F6 89.58(19) . . ? 
F1 P1 F6 88.2(2) . . ? 
F3 P1 F6 177.7(2) . . ? 
F2 P1 F6 91.15(17) . . ? 
 
loop_ 
 _geom_torsion_atom_site_label_1 
 _geom_torsion_atom_site_label_2 
 _geom_torsion_atom_site_label_3 
 _geom_torsion_atom_site_label_4 
 _geom_torsion 
 _geom_torsion_site_symmetry_1 
 _geom_torsion_site_symmetry_2 
 _geom_torsion_site_symmetry_3 
 _geom_torsion_site_symmetry_4 
 _geom_torsion_publ_flag 
C2 Re1 C1 O1 -120(6) . . . . ? 
C3 Re1 C1 O1 -31(6) . . . . ? 
N3 Re1 C1 O1 152(6) . . . . ? 
N2 Re1 C1 O1 64(6) . . . . ? 
N1 Re1 C1 O1 48(6) . . . . ? 
C1 Re1 C2 O2 -78(8) . . . . ? 
C3 Re1 C2 O2 -162(8) . . . . ? 
N3 Re1 C2 O2 25(8) . . . . ? 
N2 Re1 C2 O2 71(8) . . . . ? 
N1 Re1 C2 O2 104(8) . . . . ? 
C1 Re1 C3 O3 -59(11) . . . . ? 
C2 Re1 C3 O3 30(11) . . . . ? 
N3 Re1 C3 O3 104(11) . . . . ? 
N2 Re1 C3 O3 -155(11) . . . . ? 
N1 Re1 C3 O3 131(11) . . . . ? 
C1 Re1 N1 C24 -138.4(7) . . . . ? 
C2 Re1 N1 C24 29.3(3) . . . . ? 
C3 Re1 N1 C24 -60.2(3) . . . . ? 
N3 Re1 N1 C24 116.1(3) . . . . ? 
N2 Re1 N1 C24 -154.6(3) . . . . ? 
C1 Re1 N1 C4 -23.4(8) . . . . ? 
C2 Re1 N1 C4 144.2(2) . . . . ? 
C3 Re1 N1 C4 54.8(2) . . . . ? 
N3 Re1 N1 C4 -129.0(2) . . . . ? 
N2 Re1 N1 C4 -39.7(2) . . . . ? 
C1 Re1 N1 C14 92.4(7) . . . . ? 
C2 Re1 N1 C14 -100.0(2) . . . . ? 
C3 Re1 N1 C14 170.6(2) . . . . ? 
N3 Re1 N1 C14 -13.1(2) . . . . ? 
N2 Re1 N1 C14 76.2(2) . . . . ? 
C1 Re1 N2 C5 -148.7(2) . . . . ? 
C2 Re1 N2 C5 62.5(11) . . . . ? 
C3 Re1 N2 C5 -64.1(3) . . . . ? 
N3 Re1 N2 C5 107.9(2) . . . . ? 
N1 Re1 N2 C5 28.5(2) . . . . ? 
C1 Re1 N2 C13 24.6(3) . . . . ? 
C2 Re1 N2 C13 -124.1(10) . . . . ? 
C3 Re1 N2 C13 109.3(3) . . . . ? 
N3 Re1 N2 C13 -78.8(3) . . . . ? 
N1 Re1 N2 C13 -158.1(3) . . . . ? 
C1 Re1 N3 C15 -166.1(3) . . . . ? 
C2 Re1 N3 C15 105.2(3) . . . . ? 
C3 Re1 N3 C15 31.4(10) . . . . ? 
N2 Re1 N3 C15 -69.9(3) . . . . ? 
N1 Re1 N3 C15 4.1(3) . . . . ? 
C1 Re1 N3 C23 18.5(3) . . . . ? 
C2 Re1 N3 C23 -70.1(3) . . . . ? 
C3 Re1 N3 C23 -144.0(8) . . . . ? 
N2 Re1 N3 C23 114.7(3) . . . . ? 
N1 Re1 N3 C23 -171.2(3) . . . . ? 
C24 N1 C4 C5 174.6(3) . . . . ? 
C14 N1 C4 C5 -67.8(4) . . . . ? 
Re1 N1 C4 C5 48.4(3) . . . . ? 
C13 N2 C5 C6 -3.7(5) . . . . ? 
Re1 N2 C5 C6 170.4(3) . . . . ? 
C13 N2 C5 C4 176.5(3) . . . . ? 
Re1 N2 C5 C4 -9.4(4) . . . . ? 
N1 C4 C5 N2 -27.4(4) . . . . ? 
N1 C4 C5 C6 152.7(3) . . . . ? 
N2 C5 C6 C7 -0.4(6) . . . . ? 
C4 C5 C6 C7 179.5(3) . . . . ? 
C5 C6 C7 C8 3.4(6) . . . . ? 
C6 C7 C8 C9 177.0(4) . . . . ? 
C6 C7 C8 C13 -2.3(5) . . . . ? 
C7 C8 C9 C10 -179.2(4) . . . . ? 
C13 C8 C9 C10 0.1(6) . . . . ? 
C8 C9 C10 C11 1.7(6) . . . . ? 
C9 C10 C11 C12 -1.4(6) . . . . ? 
C10 C11 C12 C13 -0.7(6) . . . . ? 
C5 N2 C13 C12 -174.2(3) . . . . ? 
Re1 N2 C13 C12 12.7(5) . . . . ? 
C5 N2 C13 C8 4.7(5) . . . . ? 
Re1 N2 C13 C8 -168.4(2) . . . . ? 
C11 C12 C13 N2 -178.6(3) . . . . ? 
C11 C12 C13 C8 2.4(5) . . . . ? 
C7 C8 C13 N2 -1.8(5) . . . . ? 
C9 C8 C13 N2 178.9(3) . . . . ? 
C7 C8 C13 C12 177.2(3) . . . . ? 
C9 C8 C13 C12 -2.1(5) . . . . ? 
C24 N1 C14 C15 -113.9(3) . . . . ? 
C4 N1 C14 C15 132.9(3) . . . . ? 
Re1 N1 C14 C15 20.4(4) . . . . ? 
C23 N3 C15 C16 -1.9(6) . . . . ? 
Re1 N3 C15 C16 -177.7(3) . . . . ? 
C23 N3 C15 C14 -177.6(3) . . . . ? 
Re1 N3 C15 C14 6.6(4) . . . . ? 
N1 C14 C15 N3 -19.0(5) . . . . ? 
N1 C14 C15 C16 165.1(3) . . . . ? 
N3 C15 C16 C17 -0.9(6) . . . . ? 
C14 C15 C16 C17 174.9(4) . . . . ? 
C15 C16 C17 C18 2.5(7) . . . . ? 
C16 C17 C18 C19 177.0(4) . . . . ? 
C16 C17 C18 C23 -1.3(7) . . . . ? 
C17 C18 C19 C20 -177.4(5) . . . . ? 
C23 C18 C19 C20 0.9(7) . . . . ? 
C18 C19 C20 C21 1.0(7) . . . . ? 
C19 C20 C21 C22 -1.8(7) . . . . ? 
C20 C21 C22 C23 0.6(7) . . . . ? 
C21 C22 C23 N3 179.1(4) . . . . ? 
C21 C22 C23 C18 1.3(6) . . . . ? 
C15 N3 C23 C22 -174.7(4) . . . . ? 
Re1 N3 C23 C22 0.5(5) . . . . ? 
C15 N3 C23 C18 3.1(5) . . . . ? 
Re1 N3 C23 C18 178.3(3) . . . . ? 
C17 C18 C23 C22 176.3(4) . . . . ? 
C19 C18 C23 C22 -2.0(6) . . . . ? 
C17 C18 C23 N3 -1.6(6) . . . . ? 
C19 C18 C23 N3 -179.9(4) . . . . ? 
C4 N1 C24 C25 173.6(3) . . . . ? 
C14 N1 C24 C25 57.2(4) . . . . ? 
Re1 N1 C24 C25 -71.5(4) . . . . ? 
N1 C24 C25 O4 4.2(6) . . . . ? 
N1 C24 C25 O5 -175.6(3) . . . . ? 
C34 C30 C31 O32 -16.0(10) . . . . ? 
C30 C31 O32 C33 -0.9(10) . . . . ? 
C31 O32 C33 C34 17.7(8) . . . . ? 
O4 C25 O5 C26 5.8(7) . . . . ? 
C24 C25 O5 C26 -174.4(4) . . . . ? 
C27 C26 O5 C25 -60.5(6) . . . . ? 
C28 C26 O5 C25 63.3(6) . . . . ? 
C29 C26 O5 C25 -178.0(5) . . . . ? 
O32 C33 C34 C30 -26.8(7) . . . . ? 
C31 C30 C34 C33 25.3(8) . . . . ? 
 
_diffrn_measured_fraction_theta_max    0.994 
_diffrn_reflns_theta_full              29.57 
_diffrn_measured_fraction_theta_full   0.994 
_refine_diff_density_max    1.870 
_refine_diff_density_min   -0.806 
_refine_diff_density_rms    0.127 
